# Supplementary material
Source: MDPI journal article supplement (https://www.mdpi.com/2311-553X/3/2/17)
Supplement: s1 [file s1]

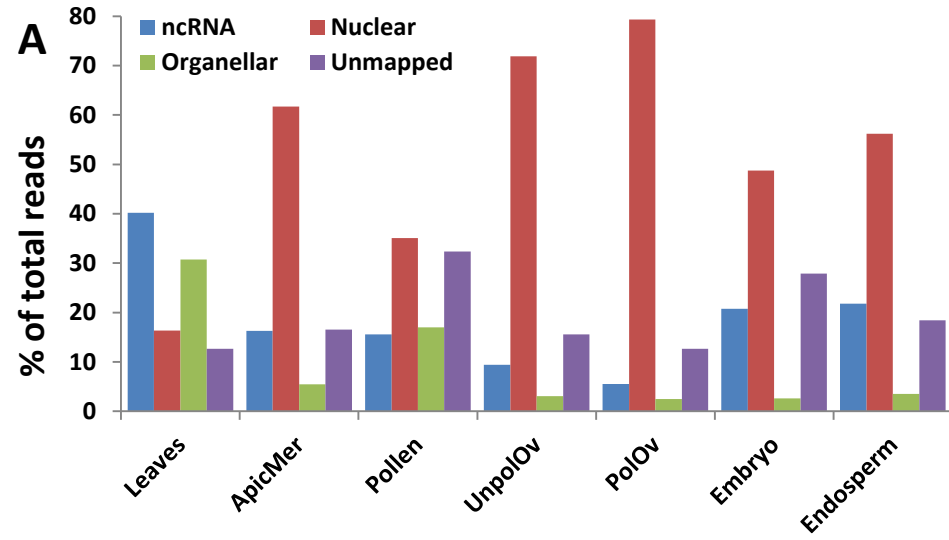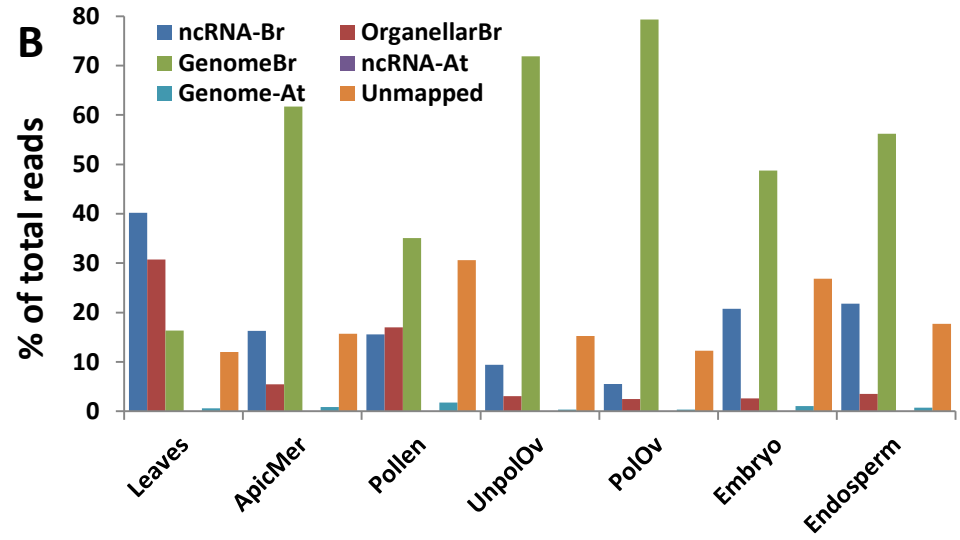

Supplementary Figure 1

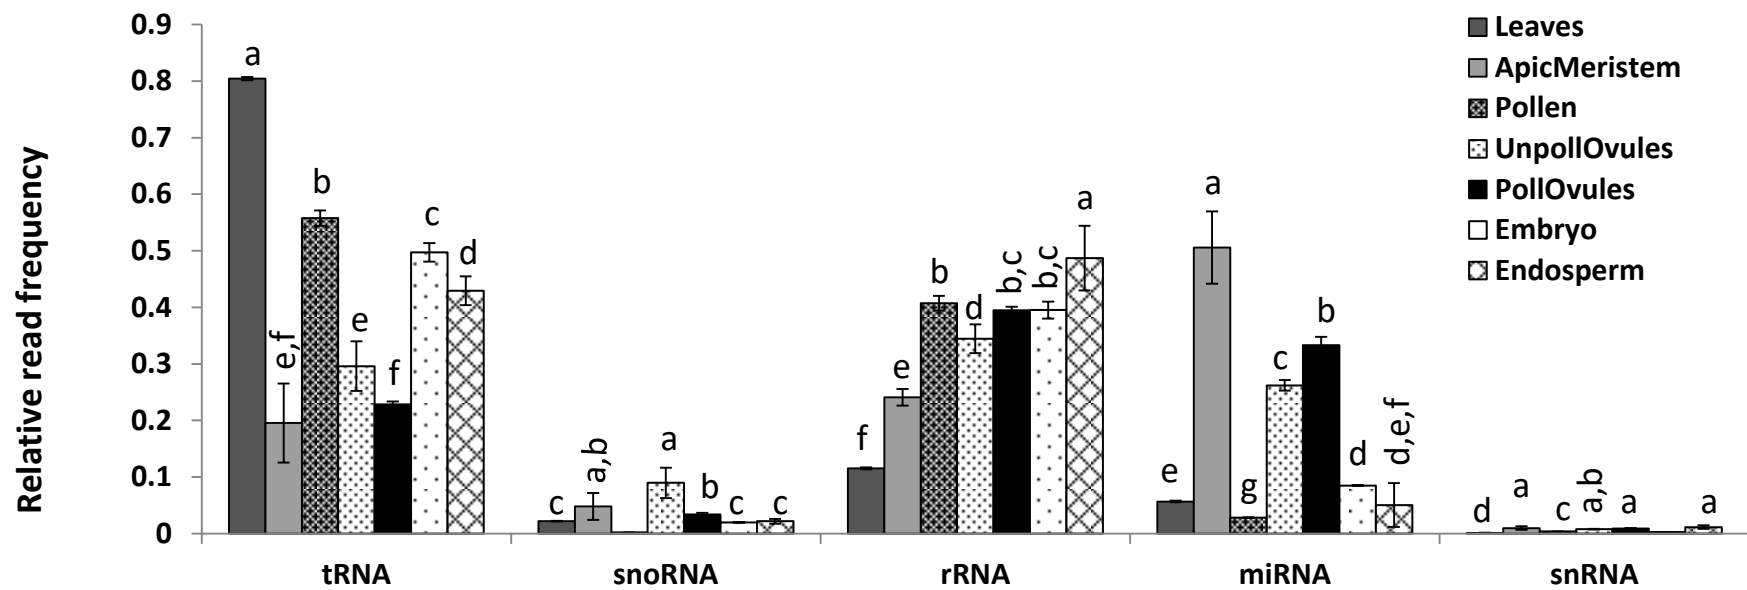

Supplementary Figure 2

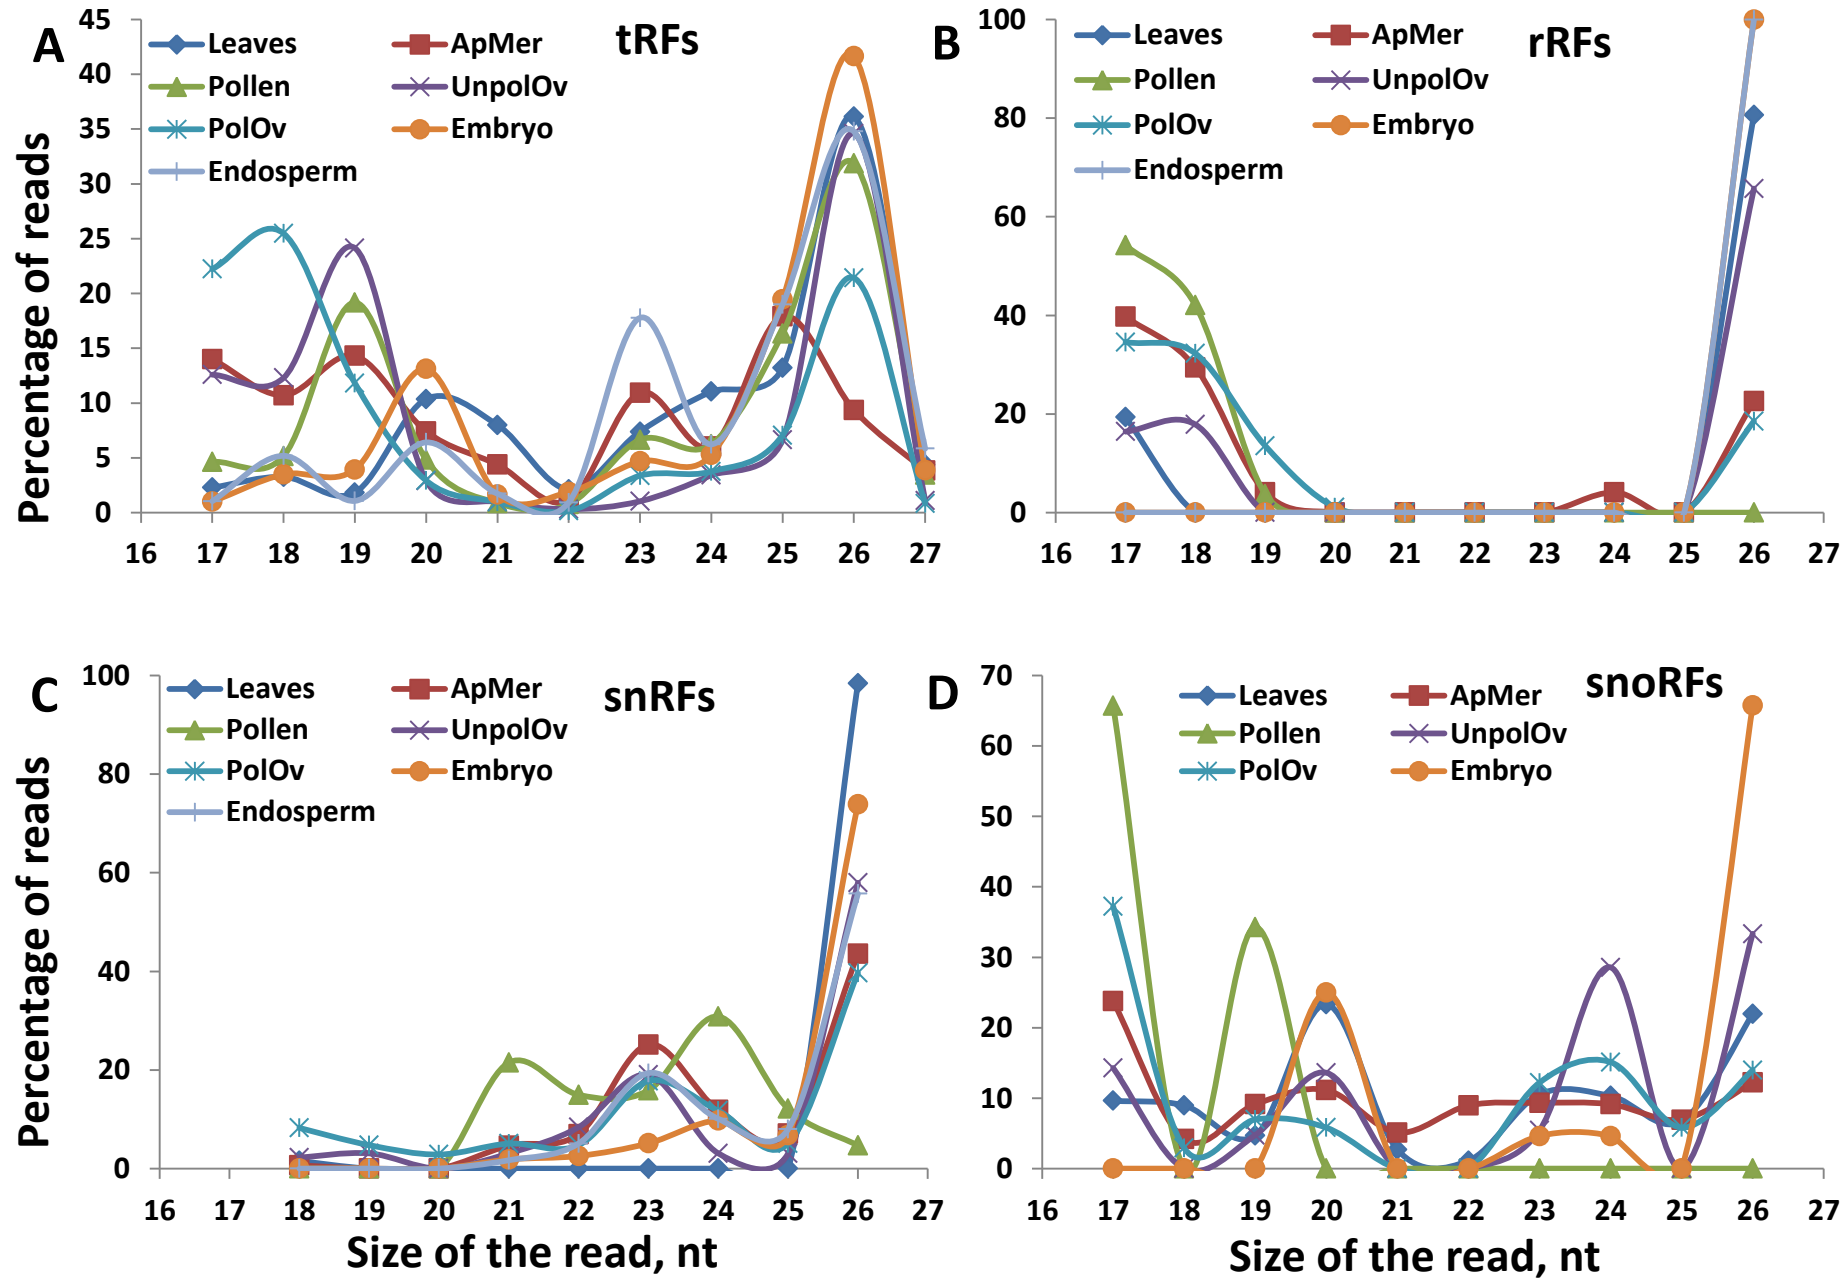

Supplementary Figure 3

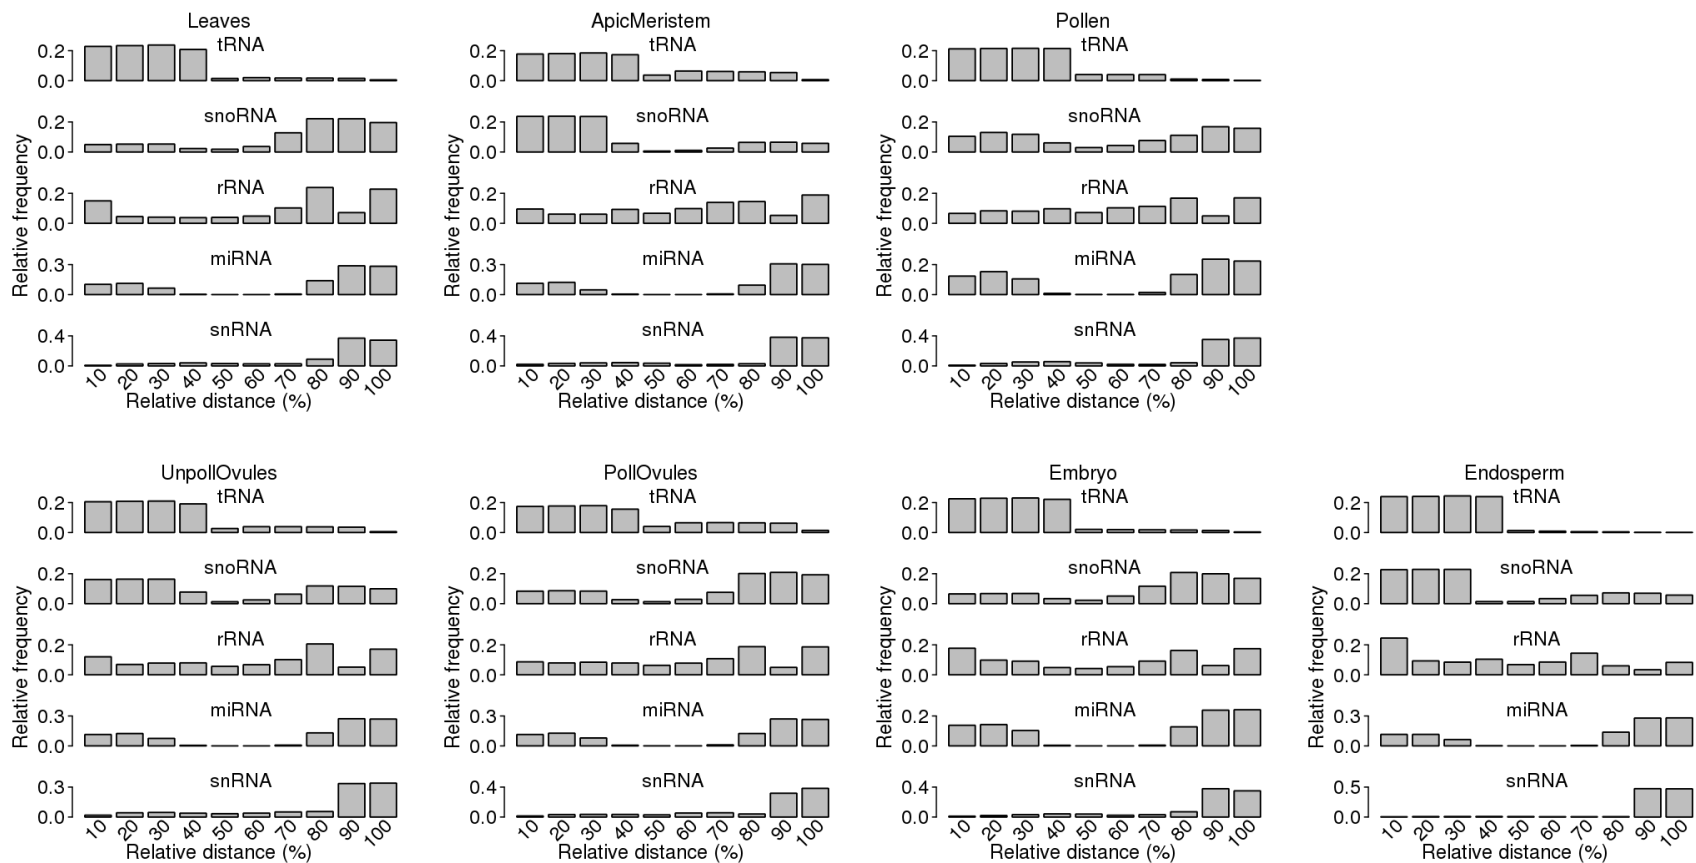

Supplementary Figure 4

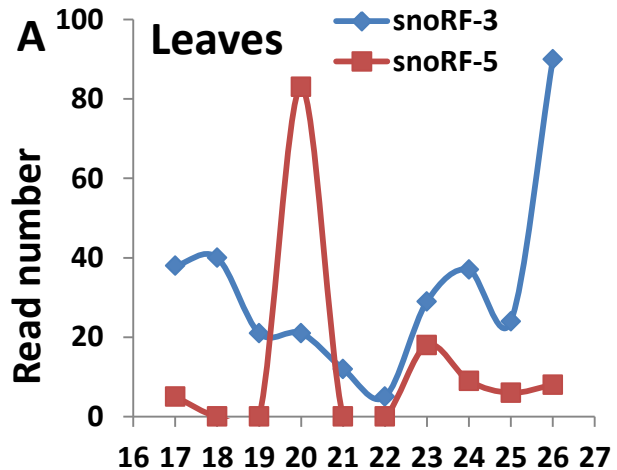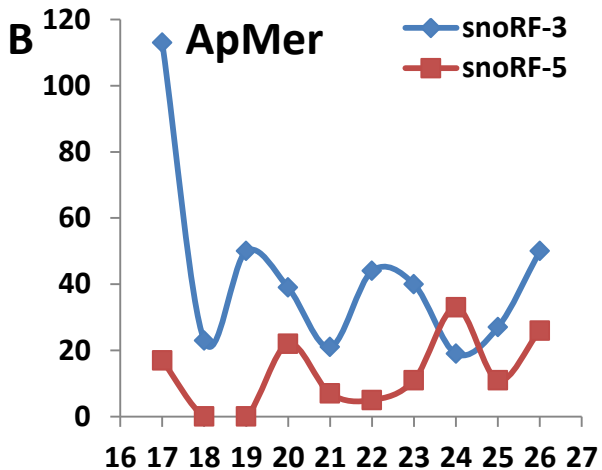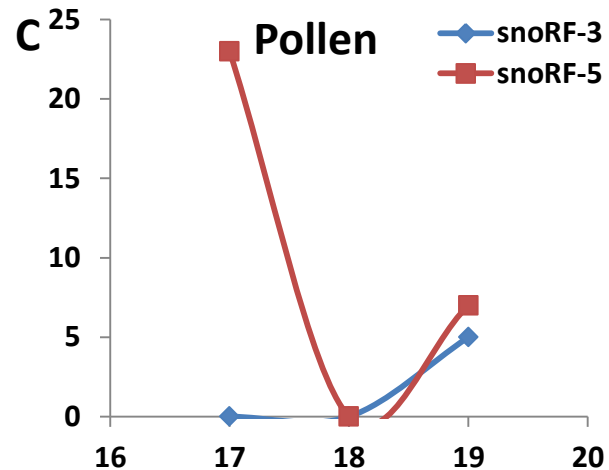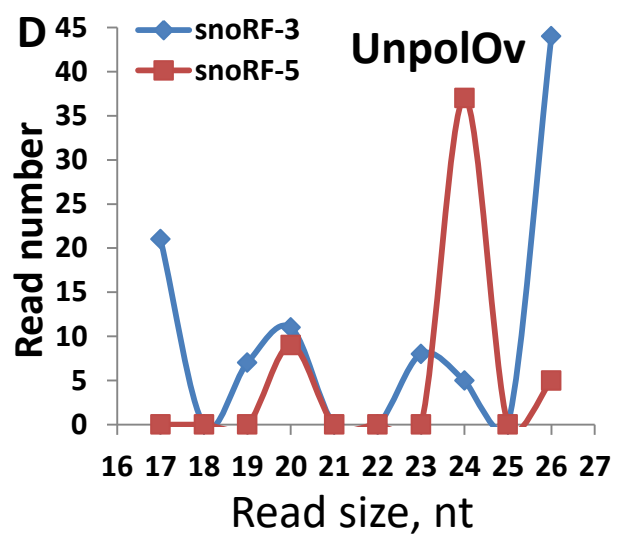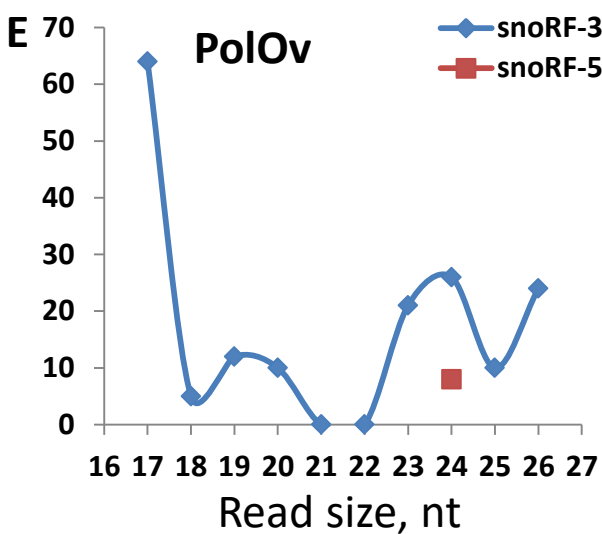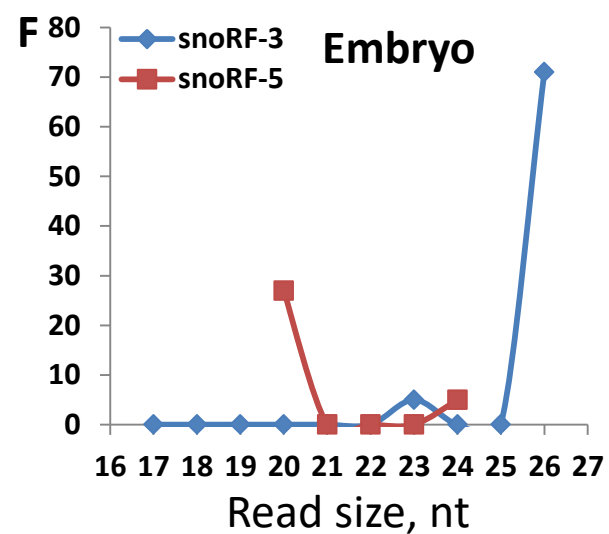

Supplementary Figure 5
