# Supplementary material
Source: MDPI journal article supplement (https://www.mdpi.com/2311-553X/3/2/17)
Supplement: s1 [file s1]

**Table S1. Frequency of occurrence of various tRNAs in different tissues of *Brassica rapa***

|               | Leaves        | ApicMer | Pollen | UnpolOv | PollOv | Embryo | Endosperm |
|---------------|---------------|---------|--------|---------|--------|--------|-----------|
| <b>Ala</b>    | 1.10          | 0.85    | 0.16   | 0.98    | 0.64   | 0.96   | 0.69      |
| <b>Arg</b>    | <b>6.89*</b>  | 0.65    | 0.22   | 0.76    | 0.43   | 0.28   | 0.10      |
| <b>Asn</b>    | 0.05          | 0.05    | 0.03   | 0.08    | 0.14   | 0.03   |           |
| <b>Asp</b>    | <b>6.73*</b>  | 0.61    | 0.24   | 1.55    | 0.63   | 3.36   | 1.31      |
| <b>Cys</b>    | 0.09          | 0.11    | 0.09   | 0.29    |        | 0.08   | 0.04      |
| <b>Gln</b>    | 0.99          | 1.08    | 1.12   | 1.71    | 1.77   | 1.22   | 1.11      |
| <b>Glu</b>    | 58.23         | 62.63   | 78.40  | 64.99   | 59.27  | 76.23  | 92.19     |
| <b>Gly</b>    | 8.18          | 23.75   | 5.56   | 24.36   | 31.18  | 14.04  | 3.16      |
| <b>His</b>    | 0.12          | 0.68    | 0.10   | 0.37    |        | 0.59   | 1.23      |
| <b>Ile</b>    | 0.02          | 0.14    |        |         | 0.10   | 0.05   |           |
| <b>Leu</b>    | 0.16          | 0.33    | 12.30  | 0.18    | 0.56   | 0.09   |           |
| <b>Lys</b>    | 0.19          | 0.16    | 0.05   | 0.83    | 0.74   | 0.15   |           |
| <b>Met</b>    | 0.25          | 0.27    | 0.06   | 0.35    | 0.22   | 0.24   |           |
| <b>Phe</b>    | 0.25          |         | 1.12   |         |        |        |           |
| <b>Pro</b>    | 0.52          |         |        | 0.12    |        | 1.29   | 0.05      |
| <b>SeC</b>    | 0.01          |         | 0.00   | 0.02    |        | 0.00   | 0.01      |
| <b>Ser</b>    | 0.12          |         |        | 0.19    |        | 0.05   |           |
| <b>Thr</b>    | 1.11          |         |        | 0.29    |        | 0.16   |           |
| <b>Trp</b>    |               |         |        |         |        |        |           |
| <b>Tyr</b>    | 3.28          | 7.96    |        | 2.93    | 3.91   | 1.15   |           |
| <b>Val</b>    | 0.13          | 0.09    | 0.19   |         |        | 0.04   |           |
| <b>Pseudo</b> | <b>11.59*</b> | 0.65    | 0.35   | 0.32    | 0.41   | 0.27   | 0.11      |

Leaves – leaf tissue, ApicMer – apical meristem, Pollen – pollen, UnpolOv – unpollinated ovule, PollOv – pollinated ovule, Embryo – embryo tissues, Endosperm – endosperm tissues. Asterisks indicate difference from all other tissues (p<0.05).

**Table S2. Frequency of occurrence of various tRFs in different tissues of *Brassica rapa***

|               | Leaves        | ApicMer | Pollen       | UnpolOv       | PollOv | Embryo | Endosperm |
|---------------|---------------|---------|--------------|---------------|--------|--------|-----------|
| <b>Ala</b>    | 8.06          | 6.54    | 0.76         | 0.11          | 0.24   | 4.70   | 17.09     |
| <b>Arg</b>    | 2.02          | 0.87    | 0.90         | <b>*13.96</b> | 0.96   | 4.17   | 1.50      |
| <b>Asn</b>    | 0.02          | 0.31    | 0.11         | 0.88          | 0.08   | 0.13   |           |
| <b>Asp</b>    | <b>*75.40</b> | 14.51   | 2.16         | 13.87         | 8.76   | 23.15  | 12.44     |
| <b>Cys</b>    | 0.07          | 0.16    | 0.53         |               |        | 0.21   |           |
| <b>Gln</b>    | 0.07          | 0.67    | <b>*8.25</b> | 0.65          | 1.63   |        |           |
| <b>Glu</b>    | 3.38          | 25.78   | 29.88        | 20.80         | 35.50  | 11.67  | 21.65     |
| <b>Gly</b>    | <b>*7.77</b>  | 43.85   | 56.67        | 42.15         | 47.44  | 51.80  | 44.20     |
| <b>His</b>    |               | 1.36    | 0.25         |               |        | 0.15   | 0.50      |
| <b>Ile</b>    | 0.01          | 0.18    |              |               | 0.08   | 0.21   |           |
| <b>Leu</b>    | 0.14          | 0.59    | 0.17         | 3.55          | 1.37   | 0.33   |           |
| <b>Lys</b>    | 0.07          | 0.18    | 0.17         | 0.74          | 0.17   | 0.14   |           |
| <b>Met</b>    | 0.06          | 2.43    | 0.06         | 0.47          | 1.36   | 2.63   |           |
| <b>Phe</b>    | 0.18          |         | 0.03         |               |        |        |           |
| <b>Pro</b>    |               |         |              |               |        | 0.11   |           |
| <b>SeC</b>    |               |         | 0.03         |               |        | 0.00   |           |
| <b>Ser</b>    | 0.03          |         |              |               |        | 0.03   |           |
| <b>Thr</b>    | 0.08          |         |              |               |        | 0.15   |           |
| <b>Trp</b>    |               |         |              |               |        |        |           |
| <b>Tyr</b>    | 1.34          | 0.07    |              |               | 0.08   | 0.16   |           |
| <b>Val</b>    | 0.10          | 0.14    | 0.03         |               |        | 0.45   |           |
| <b>Pseudo</b> | 1.27          | 2.36    | 3.15         | 2.81          | 2.35   | 2.71   | 2.62      |

Leaves – leaf tissue, ApicMer – apical meristem, Pollen – pollen, UnpolOv – unpollinated ovule, PollOv – pollinated ovule, Embryo – embryo tissues, Endosperm – endosperm tissues. Asterisks indicate difference from all other tissues (p<0.05).

**Table S3. tRF to tRNA ratio for different tissues**

| <b>tRnaType</b>   | <b>Leaves</b> | <b>ApMer</b> | <b>Pollen</b> | <b>UnpolOvule</b> | <b>PolOvule</b> | <b>Embryo</b> | <b>Endosperm</b> |
|-------------------|---------------|--------------|---------------|-------------------|-----------------|---------------|------------------|
| <b>Asp_GUC5'</b>  | 178.359       | 2.247        | 0.848         | 20.547            | 2.146           | 51.914        | 39.834           |
| <b>Pseudo_UCC</b> | 25.667        | 5.091        | 2.230         | 12.667            | 3.895           | 48.141        | 25.263           |
| <b>Gly_UCC</b>    | 24.498        | 7.619        | 2.403         | 13.555            | 6.122           | 37.944        | 26.330           |
| <b>Gln_UUG</b>    | 7.666         | 0.066        | 2.932         | 1.721             | 0.028           | 2.011         | 2.112            |
| <b>Pro_CGG</b>    | 5.929         |              |               | 2.143             |                 | 5.626         | 0.818            |
| <b>Ala_AGC</b>    | 4.573         | 0.796        | 0.160         |                   | 0.030           | 0.868         | 1.827            |
| <b>Met_CAU</b>    | 3.402         | 0.848        | 0.096         | 0.259             | 0.978           | 1.255         |                  |
| <b>Arg_CCU</b>    | 2.127         | 0.152        | 0.384         | 6.356             | 0.688           | 4.652         | 1.375            |
| <b>Arg_UCU5'</b>  | 1.951         | 0.128        |               |                   | 0.094           | 0.116         |                  |
| <b>Gly_GCC</b>    | 1.637         | 0.032        | 0.047         | 0.169             |                 | 1.006         | 2.616            |
| <b>Ala_UGC</b>    | 1.483         | 0.739        | 0.218         | 0.221             | 0.108           |               | 1.315            |
| <b>Cys_GCA</b>    | 1.457         | 0.145        | 0.579         | 2.976             |                 | 1.925         | 3.885            |
| <b>Ala_CGC</b>    | 1.453         | 0.464        | 0.045         | 0.163             |                 | 0.355         | 0.692            |
| <b>SeC_UCA</b>    | 1.250         |              | 0.833         | 2.222             |                 | 6.000         | 2.250            |
| <b>His_GUG</b>    | 1.042         | 0.192        | 0.231         | 2.026             |                 | 7.068         | 4.735            |
| <b>Glu_CUC</b>    | 1.027         | 0.345        | 0.776         | 6.886             | 0.177           | 4.582         | 1.522            |
| <b>Gly_CCC</b>    | 0.982         | 0.011        | 0.052         | 0.684             | 0.013           | 1.226         | 4.743            |
| <b>Gln_CUG5'</b>  | 0.755         | 0.056        |               | 3.702             | 0.179           | 1.907         | 0.667            |
| <b>Leu_UAG</b>    | 0.585         | 0.167        | 0.001         | 2.079             | 0.381           | 0.544         |                  |
| <b>Val_GAC</b>    | 0.500         |              |               |                   |                 |               |                  |
| <b>Pro_UGG</b>    | 0.317         |              |               |                   |                 | 0.339         |                  |
| <b>Phe_GAA</b>    | 0.313         |              | 0.003         |                   |                 |               |                  |
| <b>Val_CAC</b>    | 0.304         | 0.143        | 0.016         |                   |                 | 1.200         |                  |
| <b>Ile_UAU</b>    | 0.294         | 0.124        |               |                   | 0.114           | 0.455         |                  |
| <b>Leu_UAA</b>    | 0.283         |              |               |                   |                 | 3.000         |                  |
| <b>Pro_AGG</b>    | 0.263         |              |               |                   |                 | 0.500         |                  |
| <b>Asn_GUU</b>    | 0.200         | 0.575        | 0.321         | 1.343             | 0.085           | 0.462         |                  |
| <b>Glu_UUC5'</b>  | 0.195         | 0.030        | 0.032         | 0.174             | 0.088           | 0.243         | 0.454            |
| <b>Tyr_GUA5'</b>  | 0.181         | 0.001        |               | 0.009             | 0.003           |               |                  |

|                     |       |       |       |       |       |        |       |
|---------------------|-------|-------|-------|-------|-------|--------|-------|
| <b>Ser_UGA</b>      | 0.171 |       |       |       |       |        |       |
| <b>Lys_UUU</b>      | 0.160 | 0.107 | 0.308 | 0.095 | 0.035 | 0.144  |       |
| <b>Thr_UGU</b>      | 0.066 |       |       |       |       |        |       |
| <b>Arg_UCG</b>      | 0.034 | 0.094 |       | 0.803 |       |        |       |
| <b>Pseudo_GGC</b>   | 0.032 | 0.011 | 0.019 | 0.152 | 0.044 | 0.036  |       |
| <b>Arg_UCU3'</b>    | 0.016 | 0.064 |       | 0.450 |       |        | 0.792 |
| <b>Tyr_GUA3'</b>    | 0.004 |       |       |       |       | 0.025  |       |
| <b>Asp_GUC3'</b>    | 0.002 |       |       |       |       |        |       |
| <b>Glu_UUC3'</b>    | 0.001 |       |       |       |       | 0.0002 |       |
| <b>Gln_CUG3'</b>    |       | 0.031 | 0.048 |       |       |        |       |
| <b>Thr_CGU</b>      |       |       |       | 3.000 |       | 3.959  | 5.497 |
| <b>Ser_CGA</b>      |       |       |       | 0.524 |       | 2.041  | 5.107 |
| <b>Thr_AGU</b>      |       |       |       | 0.361 |       | 1.127  |       |
| <b>Ala_AGC</b>      |       |       |       | 0.067 |       | 0.789  |       |
| <b>Pseudo_UCU3'</b> |       |       |       |       |       | 0.005  |       |

---

The ratio was calculated by dividing the number of tRF reads (shorter or equal to 27 nt) by the number of tRNA reads (longer than 29 nt).

**Table S4. Common targets for various ncRFs**

| <b>tRF</b>  | <b>Leaves</b> | <b>ApicMer</b> | <b>Pollen</b> | <b>UnpolOv</b> | <b>PolOv</b> | <b>Embryo</b> | <b>Endosperm</b> |                                                       |
|-------------|---------------|----------------|---------------|----------------|--------------|---------------|------------------|-------------------------------------------------------|
| Bra003753   | 53            | 23             | 15            | 17             | 17           | 13            | 15               | BEL1-like homeodomain 3                               |
| Bra021314   | 31            | 10             | 5             | 8              | 8            | 8             | 9                | No annotation                                         |
| Bra013336   | 25            | 10             | 5             | 8              | 8            | 8             | 8                | Leucine-rich repeat protein kinase                    |
| Bra000529   | 14            | 42             | 42            | 19             | 25           | 33            | 36               | proteasome family protein                             |
| Bra037748   | 14            | 42             | 30            | 18             | 25           | 33            | 36               | cyclin-dependent kinase E1                            |
|             |               |                |               |                |              |               |                  | B-box type zinc finger protein with CCT               |
| Bra037499   | 10            | 10             | 7             | 3              | 5            | 13            | 1                | domain                                                |
| Bra013528   | 10            | 10             | 7             | 3              | 5            | 13            | 1                | PapD-like superfamily protein                         |
| Bra013584   | 9             | 28             | 25            | 10             | 13           | 25            | 22               | WRKY DNA binding protein 31                           |
| Bra020153   | 9             | 28             | 25            | 10             | 13           | 26            | 24               | LA RNA-binding protein                                |
| Bra012143   | 9             | 33             | 25            | 10             | 13           | 25            | 21               | Unknown                                               |
| Bra016601   | 8             | 21             | 19            | 14             | 16           | 17            | 10               | alpha/beta-Hydrolases superfamily protein             |
| Bra034753   | 7             | 2              | 2             | 3              | 1            | 2             | 4                | Unknown                                               |
|             |               |                |               |                |              |               |                  | nudix hydrolase homolog 3,                            |
| Bra003597   | 7             | 2              | 2             | 3              | 1            | 2             | 4                | phosphohydrolase                                      |
| Bra023172   | 7             | 2              | 2             | 3              | 1            | 2             | 4                | Argonaute family protein - AGO2                       |
| Bra032111   | 5             | 14             | 15            | 9              | 12           | 8             | 14               | LJRHL1-like 1                                         |
|             |               |                |               |                |              |               |                  | associated molecule with the SH3 domain               |
| Bra033536   | 4             | 5              | 8             | 2              | 8            | 3             | 2                | of STAM 3                                             |
| <b>rRF</b>  | <b>Leaves</b> | <b>ApicMer</b> | <b>Pollen</b> | <b>UnpolOv</b> | <b>PolOv</b> | <b>Embryo</b> | <b>Endosperm</b> |                                                       |
| Bra030994   | 5             | 4              |               | 5              | 5            | 5             | 5                | Disease resistance protein (TIR-NBS-LRR class) family |
| Bra034079   | 5             | 4              |               | 5              | 5            | 5             | 5                | Disease resistance protein (TIR-NBS-LRR class) family |
| Bra013685   | 5             | 4              |               | 5              | 5            | 5             | 5                | unknown                                               |
| <b>snRF</b> | <b>Leaves</b> | <b>ApicMer</b> | <b>Pollen</b> | <b>UnpolOv</b> | <b>PolOv</b> | <b>Embryo</b> | <b>Endosperm</b> |                                                       |
| Bra032383   | 0             | 2              | 2             | 2              | 3            | 2             | 2                |                                                       |

|           |   |   |   |   |   |   |   |                                                            |
|-----------|---|---|---|---|---|---|---|------------------------------------------------------------|
| Bra034244 | 0 | 1 | 1 | 1 | 1 | 1 | 1 | Tetratricopeptide repeat (TPR)-like<br>superfamily protein |
| Bra018742 | 0 | 8 | 1 | 3 | 6 | 8 | 7 |                                                            |
| Bra030327 | 0 | 1 | 1 | 1 | 1 | 1 | 1 |                                                            |

| snoRF     | Leaves | ApicMer | Pollen | UnpolOv | PolOv | Embryo | Endosperm |                                                |
|-----------|--------|---------|--------|---------|-------|--------|-----------|------------------------------------------------|
| Bra039448 | 5      | 3       | 0      | 2       | 2     | 3      | 0         | unknown function                               |
| Bra034045 | 3      | 3       | 0      | 2       | 2     | 3      | 0         | Peptidase S24/S26A/S26B/S26C family<br>protein |
| Bra029738 | 3      | 3       | 0      | 2       | 2     | 3      | 0         | Peptidase S24/S26A/S26B/S26C family<br>protein |

Numbers show the number of unique ncRFs targeting specific genes.

**Table S5. Frequency of predicted binding of tRFs to various regions of their potential targets in different tissues**

Each mRNA target was divided into three sections (5' third, central third and 3' third). The number of tRFs binding to specific regions is expressed in percentage of total.

| tRF    |                | Cleavage   |               |           | Translation inhibition |               |           |
|--------|----------------|------------|---------------|-----------|------------------------|---------------|-----------|
| tissue |                | 5' third   | central third | 3' third  | 5' third               | central third | 3' third  |
| 1      | leaves         | 48%        | 50%           | 2%        | 65%                    | 34%           | 2%        |
| 2      | ap_meri        | 68%        | 31%           | 2%        | 23%                    | 75%           | 2%        |
| 3      | pollen         | 66%        | 34%           | 0%        | 15%                    | 85%           | 0%        |
| 4      | unpol_ovule    | 75%        | 24%           | 1%        | 26%                    | 73%           | 1%        |
| 5      | pol_ovule      | 74%        | 26%           | 1%        | 25%                    | 74%           | 1%        |
| 6      | embryo         | 41%        | 58%           | 1%        | 24%                    | 75%           | 1%        |
| 7      | endosperm      | 64%        | 36%           | 0%        | 13%                    | 87%           | 0%        |
|        | <b>Average</b> | <b>63%</b> | <b>37%</b>    | <b>1%</b> | <b>26%</b>             | <b>74%</b>    | <b>1%</b> |
