# Supplementary material
Source: MDPI journal article supplement (https://www.mdpi.com/2311-553X/3/2/17)
Supplement: s1 [file s1]

## Supplementary file 1

### tRF - Leaves

| ncRNA<br>_Acc. | Target<br>_Acc. | Expect<br>ation | UP<br>E  | ncRNA<br>_start | ncRNA<br>_end | Target_<br>start | Target<br>_end | ncRNA_aligned_fragmen<br>t | Target_aligned_fragmen<br>t | Inhibit<br>ion | Multip<br>licity |
|----------------|-----------------|-----------------|----------|-----------------|---------------|------------------|----------------|----------------------------|-----------------------------|----------------|------------------|
| trf_1_4<br>64  | Bra000<br>111   | 3               | 14.<br>5 | 1               | 22            | 635              | 656            | GGGAUUGUAGUUAAAU<br>UGGUCA | UGGUUCAUUUAGCUAC<br>AAUCCC  | Cleava<br>ge   | 1                |
| trf_1_8        | Bra000<br>529   | 2.5             | 11.<br>2 | 1               | 21            | 984              | 1004           | UCCGUUAUCGUCCAGCG<br>GUUA  | UAACCGGAGGACGAUA<br>AUGGA   | Cleava<br>ge   | 1                |
| trf_1_9        | Bra000<br>529   | 2.5             | 11.<br>2 | 1               | 21            | 984              | 1004           | UCCGUUAUCGUCCAGCG<br>GUUA  | UAACCGGAGGACGAUA<br>AUGGA   | Cleava<br>ge   | 1                |
| trf_1_1<br>0   | Bra000<br>529   | 2.5             | 11.<br>2 | 1               | 21            | 984              | 1004           | UCCGUUAUCGUCCAGCG<br>GUUA  | UAACCGGAGGACGAUA<br>AUGGA   | Cleava<br>ge   | 1                |
| trf_1_9<br>4   | Bra000<br>529   | 3               | 11.<br>2 | 1               | 21            | 984              | 1004           | UCCGUUGUCGUCCAGCG<br>GUUA  | UAACCGGAGGACGAUA<br>AUGGA   | Cleava<br>ge   | 1                |
| trf_1_9<br>5   | Bra000<br>529   | 3               | 11.<br>2 | 1               | 21            | 984              | 1004           | UCCGUUGUCGUCCAGCG<br>GUUA  | UAACCGGAGGACGAUA<br>AUGGA   | Cleava<br>ge   | 1                |
| trf_1_2<br>31  | Bra000<br>529   | 2.5             | 11.<br>2 | 1               | 21            | 984              | 1004           | UCCGUUAUCGUCCAGCG<br>GUUA  | UAACCGGAGGACGAUA<br>AUGGA   | Cleava<br>ge   | 1                |
| trf_1_2<br>32  | Bra000<br>529   | 2.5             | 11.<br>2 | 1               | 21            | 984              | 1004           | UCCGUUAUCGUCCAGCG<br>GUUA  | UAACCGGAGGACGAUA<br>AUGGA   | Cleava<br>ge   | 1                |
| trf_1_2<br>59  | Bra000<br>529   | 3               | 11.<br>2 | 1               | 20            | 985              | 1004           | UCCGUUGUCGUCCAGCG<br>GUU   | AACCGGAGGACGAUAA<br>UGGA    | Cleava<br>ge   | 1                |
| trf_1_2<br>61  | Bra000<br>529   | 3               | 11.<br>2 | 1               | 21            | 984              | 1004           | UCCGUUGUCGUCCAGCG<br>GUUA  | UAACCGGAGGACGAUA<br>AUGGA   | Cleava<br>ge   | 1                |
| trf_1_2<br>87  | Bra000<br>529   | 3               | 11.<br>2 | 1               | 21            | 984              | 1004           | UCCGUUGUCGUCCAGCG<br>GUUA  | UAACCGGAGGACGAUA<br>AUGGA   | Cleava<br>ge   | 1                |
| trf_1_2<br>88  | Bra000<br>529   | 3               | 11.<br>2 | 1               | 21            | 984              | 1004           | UCCGUUGUCGUCCAGCG<br>GUUA  | UAACCGGAGGACGAUA<br>AUGGA   | Cleava<br>ge   | 1                |
| trf_1_5<br>10  | Bra000<br>529   | 3               | 11.<br>2 | 1               | 21            | 984              | 1004           | UCCGUUGUCGUCCAGCG<br>GUUA  | UAACCGGAGGACGAUA<br>AUGGA   | Cleava<br>ge   | 1                |
| trf_1_5<br>11  | Bra000<br>529   | 3               | 11.<br>2 | 1               | 21            | 984              | 1004           | UCCGUUGUCGUCCAGCG<br>GUUA  | UAACCGGAGGACGAUA<br>AUGGA   | Cleava<br>ge   | 1                |

|         |        |     |   |   |    |      |      |                   |                   |        |   |
|---------|--------|-----|---|---|----|------|------|-------------------|-------------------|--------|---|
| trf_1_5 | Bra000 | 11. |   |   |    |      |      | UCCGUUGUCGUCCAGCG | UAACCGGAGGACGAUA  | Cleava |   |
| 12      | 529    | 3   | 2 | 1 | 21 | 984  | 1004 | GUUA              | AUGGA             | ge     | 1 |
| trf_1_1 | Bra000 | 16. |   |   |    |      |      | GACGGUUUGGCCGAGU  | AACCAUUCCGCCAAAU  | Cleava |   |
| 26      | 788    | 3   | 6 | 1 | 20 | 52   | 71   | GGUC              | GUC               | ge     | 1 |
| trf_1_5 | Bra000 | 11. |   |   |    |      |      | GUCUGGGUGGUGUAGU  | GCUAACCAACUACACCA | Cleava |   |
| 4       | 881    | 2.5 | 0 | 1 | 24 | 162  | 185  | CGGUUAUC          | UCCAGAA           | ge     | 1 |
| trf_1_1 | Bra000 | 11. |   |   |    |      |      | GUCUGGGUGGUGUAGU  | GCUAACCAACUACACCA | Cleava |   |
| 88      | 881    | 2.5 | 0 | 1 | 24 | 162  | 185  | CGGUUAUC          | UCCAGAA           | ge     | 1 |
| trf_1_5 | Bra000 | 11. |   |   |    |      |      | GUCUGGGUGGUGUAGU  | GCUAACCAACUACACCA | Cleava |   |
| 28      | 881    | 2.5 | 0 | 1 | 24 | 162  | 185  | CGGUUAUC          | UCCAGAA           | ge     | 1 |
| trf_1_4 | Bra000 | 17. |   |   |    |      |      | UGGAUUGUAGUUCAAU  | GCUCUUACCAGUUGAA  | Cleava |   |
| 25      | 885    | 3   | 3 | 1 | 26 | 398  | 423  | UGGUCAGAGC        | CUACAAAUCG        | ge     | 1 |
| trf_1_4 | Bra000 | 17. |   |   |    |      |      | UGGAUUGUAGUUCAAU  | CUCUUACCAGUUGAAC  | Cleava |   |
| 62      | 885    | 3   | 3 | 1 | 25 | 399  | 423  | UGGUCAGAG         | UACAAAUCG         | ge     | 1 |
| trf_1_4 | Bra000 | 17. |   |   |    |      |      | UGGAUUGUAGUUCAAU  | GCUCUUACCAGUUGAA  | Cleava |   |
| 66      | 885    | 3   | 3 | 1 | 26 | 398  | 423  | UGGUCAGAGC        | CUACAAAUCG        | ge     | 1 |
| trf_1_1 | Bra001 | 24. |   |   |    |      |      | ACCUACUUAACUCAGUG | CUAACCAUGGCGUUA   | Cleava |   |
| 05      | 550    | 3   | 2 | 1 | 22 | 1006 | 1027 | GUUAG             | GUGGGU            | ge     | 1 |
| trf_1_4 | Bra002 | 25. |   |   |    |      |      | GGGAUUGUAGUUCAAU  | GGCAGUUGAUCUACAA  | Transl |   |
| 60      | 337    | 3   | 0 | 1 | 20 | 863  | 882  | UGUC              | UUUC              | ation  | 1 |
| trf_1_1 | Bra002 | 10. |   |   |    |      |      | GACGGUUUGGCCGAGU  | GACUUUCCGGCCAAACC | Cleava |   |
| 26      | 609    | 3   | 2 | 1 | 20 | 1237 | 1256 | GGUC              | GUC               | ge     | 1 |
| trf_1_1 | Bra002 | 16. |   |   |    |      |      | AGGGAUAUAACUCAGCG | CUGCUGCUGAGUUCUA  | Cleava |   |
| 95      | 746    | 3   | 3 | 1 | 21 | 218  | 238  | GUAG              | UCCCA             | ge     | 1 |
| trf_1_1 | Bra002 | 16. |   |   |    |      |      | AGGGAUAUAACUCAGCG | CUGCUGCUGAGUUCUA  | Cleava |   |
| 96      | 746    | 3   | 3 | 1 | 21 | 218  | 238  | GUAG              | UCCCA             | ge     | 1 |
| trf_1_1 | Bra002 | 16. |   |   |    |      |      | AGGGAUAUAACUCAGCG | CUGCUGCUGAGUUCUA  | Cleava |   |
| 97      | 746    | 3   | 3 | 1 | 21 | 218  | 238  | GUAG              | UCCCA             | ge     | 1 |
| trf_1_1 | Bra002 | 16. |   |   |    |      |      | AGGGAUAUAACUCAGCG | UGCUGCUGAGUUCUAU  | Cleava |   |
| 98      | 746    | 3   | 3 | 1 | 20 | 219  | 238  | GUA               | CCCA              | ge     | 1 |
| trf_1_1 | Bra002 | 16. |   |   |    |      |      | AGGGAUAUAACUCAGCG | CUGCUGCUGAGUUCUA  | Cleava |   |
| 99      | 746    | 3   | 3 | 1 | 21 | 218  | 238  | GUAG              | UCCCA             | ge     | 1 |
| trf_1_5 | Bra003 | 16. |   |   |    |      |      | GCUGGAGUAGCUCAGU  | CCUAACGGAGCUGCUC  | Cleava |   |
| 29      | 013    | 3   | 5 | 1 | 20 | 319  | 338  | UGGU              | AGC               | ge     | 1 |

|         |        |     |   |   |    |      |      |                  |                   |             |   |
|---------|--------|-----|---|---|----|------|------|------------------|-------------------|-------------|---|
| trf_1_5 | Bra003 | 15. |   |   |    |      |      | GUCUGGGUGGUGUAGU | GCUCACCAGCUACACCA | Cleavage    |   |
| 4       | 121    | 3   | 1 | 1 | 24 | 760  | 783  | CGGUUAUC         | CACAGAC           | ge          | 1 |
| trf_1_1 | Bra003 | 15. |   |   |    |      |      | GUCUGGGUGGUGUAGU | GCUCACCAGCUACACCA | Cleavage    |   |
| 88      | 121    | 3   | 1 | 1 | 24 | 760  | 783  | CGGUUAUC         | CACAGAC           | ge          | 1 |
| trf_1_5 | Bra003 | 15. |   |   |    |      |      | GUCUGGGUGGUGUAGU | GCUCACCAGCUACACCA | Cleavage    |   |
| 28      | 121    | 3   | 1 | 1 | 24 | 760  | 783  | CGGUUAUC         | CACAGAC           | ge          | 1 |
| trf_1_1 | Bra003 | 24. |   |   |    |      |      | GACGGUUUGGCCGAGU | GGCGAUUCGGCCAAAU  | Cleavage    |   |
| 26      | 534    | 3   | 7 | 1 | 20 | 3589 | 3608 | GGUC             | UGUC              | ge          | 1 |
| trf_1_4 | Bra003 | 13. |   |   |    |      |      | GGGAUUGUAGUUCAAU | UCCAGUUAUUCUACAA  | Translation |   |
| 18      | 597    | 3   | 1 | 1 | 20 | 1508 | 1527 | UGGA             | UUCC              | ation       | 1 |
| trf_1_4 | Bra003 | 13. |   |   |    |      |      | GGGAUUGUAGUUCAAU | UCCAGUUAUUCUACAA  | Translation |   |
| 19      | 597    | 3   | 1 | 1 | 20 | 1508 | 1527 | UGGA             | UUCC              | ation       | 1 |
| trf_1_4 | Bra003 | 13. |   |   |    |      |      | GGGAUUGUAGUUCAAU | UCCAGUUAUUCUACAA  | Translation |   |
| 34      | 597    | 3   | 1 | 1 | 20 | 1508 | 1527 | UGGA             | UUCC              | ation       | 1 |
| trf_1_4 | Bra003 | 13. |   |   |    |      |      | GGGAUUGUAGUUCAAU | UCCAGUUAUUCUACAA  | Translation |   |
| 45      | 597    | 3   | 1 | 1 | 20 | 1508 | 1527 | UGGA             | UUCC              | ation       | 1 |
| trf_1_4 | Bra003 | 13. |   |   |    |      |      | GGGAUUGUAGUUCAAU | AUCCAGUUAUUCUACAA | Translation |   |
| 47      | 597    | 3   | 1 | 1 | 21 | 1507 | 1527 | UGGAU            | UUCC              | ation       | 1 |
| trf_1_4 | Bra003 | 13. |   |   |    |      |      | GGGAUUGUAGUUCAAU | UCCAGUUAUUCUACAA  | Translation |   |
| 56      | 597    | 3   | 1 | 1 | 20 | 1508 | 1527 | UGGA             | UUCC              | ation       | 1 |
| trf_1_4 | Bra003 | 13. |   |   |    |      |      | GGGAUUGUAGUUCAAU | UCCAGUUAUUCUACAA  | Translation |   |
| 65      | 597    | 3   | 1 | 1 | 20 | 1508 | 1527 | UGGA             | UUCC              | ation       | 1 |
| trf_1_5 | Bra003 | 23. |   |   |    |      |      | GCUGGAGUAGCUCAGU | CGAACCAACCGGGCUAC | Cleavage    |   |
| 29      | 602    | 3   | 1 | 1 | 23 | 271  | 293  | UGGUUAG          | UGCAGC            | ge          | 1 |
| trf_1_4 | Bra003 | 16. |   |   |    |      |      | GGGAUUGUAGUUCAAU | ACCAGUUGAAUUACAA  | Cleavage    |   |
| 13      | 753    | 2.5 | 2 | 1 | 20 | 284  | 303  | CGGU             | UCCU              | ge          | 1 |
| trf_1_4 | Bra003 | 16. |   |   |    |      |      | GGGAUUGUAGUUCAAU | ACCAGUUGAAUUACAA  | Cleavage    |   |
| 14      | 753    | 1.5 | 2 | 1 | 20 | 284  | 303  | UGGU             | UCCU              | ge          | 1 |
| trf_1_4 | Bra003 | 16. |   |   |    |      |      | GGGAUUGUAGUUCAAU | ACCAGUUGAAUUACAA  | Cleavage    |   |
| 15      | 753    | 1.5 | 2 | 1 | 20 | 284  | 303  | UGGU             | UCCU              | ge          | 1 |
| trf_1_4 | Bra003 | 16. |   |   |    |      |      | GGGAUUGUAGUUCAAU | ACCAGUUGAAUUACAA  | Cleavage    |   |
| 16      | 753    | 1.5 | 2 | 1 | 20 | 284  | 303  | UGGU             | UCCU              | ge          | 1 |
| trf_1_4 | Bra003 | 16. |   |   |    |      |      | GGGAUUGUAGUUCAAU | ACCAGUUGAAUUACAA  | Cleavage    |   |
| 18      | 753    | 2.5 | 2 | 1 | 20 | 284  | 303  | UGGA             | UCCU              | ge          | 1 |

|         |        |     |   |   |    |     |     |                  |                  |        |   |
|---------|--------|-----|---|---|----|-----|-----|------------------|------------------|--------|---|
| trf_1_4 | Bra003 | 16. |   |   |    |     |     | GGGAUUGUAGUUCAAU | ACCAGUUGAAUUACAA | Cleava |   |
| 19      | 753    | 2.5 | 2 | 1 | 20 | 284 | 303 | UGGA             | UCCU             | ge     | 1 |
| trf_1_4 | Bra003 | 16. |   |   |    |     |     | GGGAUUGUAGUUCAAU | ACCAGUUGAAUUACAA | Cleava |   |
| 20      | 753    | 2.5 | 2 | 1 | 20 | 284 | 303 | UGGC             | UCCU             | ge     | 1 |
| trf_1_4 | Bra003 | 16. |   |   |    |     |     | NGGAUUGUAGUUCAAU | ACCAGUUGAAUUACAA | Cleava |   |
| 21      | 753    | 2   | 2 | 1 | 20 | 284 | 303 | UGGU             | UCCU             | ge     | 1 |
| trf_1_4 | Bra003 | 16. |   |   |    |     |     | GGGAUUGUAGUUCAAU | ACCAGUUGAAUUACAA | Cleava |   |
| 22      | 753    | 1.5 | 2 | 1 | 20 | 284 | 303 | UGGU             | UCCU             | ge     | 1 |
| trf_1_4 | Bra003 | 16. |   |   |    |     |     | GGGAUUGUAGUUCAAU | ACCAGUUGAAUUACAA | Cleava |   |
| 23      | 753    | 1.5 | 2 | 1 | 20 | 284 | 303 | UGGU             | UCCU             | ge     | 1 |
| trf_1_4 | Bra003 | 16. |   |   |    |     |     | GGGAUUGUAGUUCAAU | ACCAGUUGAAUUACAA | Cleava |   |
| 24      | 753    | 1.5 | 2 | 1 | 20 | 284 | 303 | UGGU             | UCCU             | ge     | 1 |
| trf_1_4 | Bra003 | 16. |   |   |    |     |     | UGGAUUGUAGUUCAAU | ACCAGUUGAAUUACAA | Cleava |   |
| 25      | 753    | 2   | 2 | 1 | 20 | 284 | 303 | UGGU             | UCCU             | ge     | 1 |
| trf_1_4 | Bra003 | 16. |   |   |    |     |     | GGGAUUGUAGUUCAAU | ACCAGUUGAAUUACAA | Cleava |   |
| 26      | 753    | 1.5 | 2 | 1 | 20 | 284 | 303 | UGGU             | UCCU             | ge     | 1 |
| trf_1_4 | Bra003 | 16. |   |   |    |     |     | GGGAUCGUAGUUCAAU | ACCAGUUGAAUUACAA | Cleava |   |
| 28      | 753    | 3   | 2 | 1 | 20 | 284 | 303 | UGGU             | UCCU             | ge     | 1 |
| trf_1_4 | Bra003 | 16. |   |   |    |     |     | GGGAUUGUAGUUCAAU | ACCAGUUGAAUUACAA | Cleava |   |
| 29      | 753    | 1.5 | 2 | 1 | 20 | 284 | 303 | UGGU             | UCCU             | ge     | 1 |
| trf_1_4 | Bra003 | 16. |   |   |    |     |     | GGGAUUGUAGUUCAAU | AACCAGUUGAAUUACA | Cleava |   |
| 30      | 753    | 2.5 | 2 | 1 | 21 | 283 | 303 | UGGCU            | AUCCU            | ge     | 1 |
| trf_1_4 | Bra003 | 16. |   |   |    |     |     | GGGAUUGUAGUUCAAU | ACCAGUUGAAUUACAA | Cleava |   |
| 31      | 753    | 1.5 | 2 | 1 | 20 | 284 | 303 | UGGU             | UCCU             | ge     | 1 |
| trf_1_4 | Bra003 | 16. |   |   |    |     |     | GGGAUUGUAGUUCAAU | ACCAGUUGAAUUACAA | Cleava |   |
| 33      | 753    | 2.5 | 2 | 1 | 20 | 284 | 303 | UGGG             | UCCU             | ge     | 1 |
| trf_1_4 | Bra003 | 16. |   |   |    |     |     | GGGAUUGUAGUUCAAU | ACCAGUUGAAUUACAA | Cleava |   |
| 34      | 753    | 2.5 | 2 | 1 | 20 | 284 | 303 | UGGA             | UCCU             | ge     | 1 |
| trf_1_4 | Bra003 | 16. |   |   |    |     |     | NGGAUUGUAGUUCAAU | ACCAGUUGAAUUACAA | Cleava |   |
| 35      | 753    | 2   | 2 | 1 | 20 | 284 | 303 | UGGU             | UCCU             | ge     | 1 |
| trf_1_4 | Bra003 | 16. |   |   |    |     |     | GGGAUUGUAGUUCAAU | ACCAGUUGAAUUACAA | Cleava |   |
| 36      | 753    | 2.5 | 2 | 1 | 20 | 284 | 303 | CGGU             | UCCU             | ge     | 1 |
| trf_1_4 | Bra003 | 16. |   |   |    |     |     | GGGAUUGUAGUUCAAU | ACCAGUUGAAUUACAA | Cleava |   |
| 37      | 753    | 2.5 | 2 | 1 | 20 | 284 | 303 | UGGC             | UCCU             | ge     | 1 |

|         |        |     |   |   |    |     |     |                  |                  |        |   |
|---------|--------|-----|---|---|----|-----|-----|------------------|------------------|--------|---|
| trf_1_4 | Bra003 | 16. |   |   |    |     |     | GGGAUUGUAGUUCAAU | ACCAGUUGAAUUACAA | Cleava |   |
| 38      | 753    | 1.5 | 2 | 1 | 20 | 284 | 303 | UGGU             | UCCU             | ge     | 1 |
| trf_1_4 | Bra003 | 16. |   |   |    |     |     | GGGAUUGUAGUUCAAU | ACCAGUUGAAUUACAA | Cleava |   |
| 39      | 753    | 1.5 | 2 | 1 | 20 | 284 | 303 | UGGU             | UCCU             | ge     | 1 |
| trf_1_4 | Bra003 | 16. |   |   |    |     |     | GGGAUUGUAGUUCAAU | ACCAGUUGAAUUACAA | Cleava |   |
| 40      | 753    | 1.5 | 2 | 1 | 20 | 284 | 303 | UGGU             | UCCU             | ge     | 1 |
| trf_1_4 | Bra003 | 16. |   |   |    |     |     | GGGAUUGUAGUUCAAU | ACCAGUUGAAUUACAA | Cleava |   |
| 41      | 753    | 2.5 | 2 | 1 | 20 | 284 | 303 | UGGG             | UCCU             | ge     | 1 |
| trf_1_4 | Bra003 | 16. |   |   |    |     |     | GGGAUUGUAGUUCAAU | ACCAGUUGAAUUACAA | Cleava |   |
| 42      | 753    | 2.5 | 2 | 1 | 20 | 284 | 303 | UGGG             | UCCU             | ge     | 1 |
| trf_1_4 | Bra003 | 16. |   |   |    |     |     | GGGAUUGUAGUUCAAU | ACCAGUUGAAUUACAA | Cleava |   |
| 43      | 753    | 1.5 | 2 | 1 | 20 | 284 | 303 | UGGU             | UCCU             | ge     | 1 |
| trf_1_4 | Bra003 | 16. |   |   |    |     |     | GGGAUUGUAGUUCAAU | ACCAGUUGAAUUACAA | Cleava |   |
| 44      | 753    | 1.5 | 2 | 1 | 20 | 284 | 303 | UGGU             | UCCU             | ge     | 1 |
| trf_1_4 | Bra003 | 16. |   |   |    |     |     | GGGAUUGUAGUUCAAU | ACCAGUUGAAUUACAA | Cleava |   |
| 45      | 753    | 2.5 | 2 | 1 | 20 | 284 | 303 | UGGA             | UCCU             | ge     | 1 |
| trf_1_4 | Bra003 | 16. |   |   |    |     |     | GGGAUUGUAGUUCAAU | AACCAGUUGAAUUACA | Cleava |   |
| 47      | 753    | 2.5 | 2 | 1 | 21 | 283 | 303 | UGGAU            | AUCCU            | ge     | 1 |
| trf_1_4 | Bra003 | 16. |   |   |    |     |     | GGGAUUGUAGUUCAAU | ACCAGUUGAAUUACAA | Cleava |   |
| 48      | 753    | 2.5 | 2 | 1 | 20 | 284 | 303 | UGGC             | UCCU             | ge     | 1 |
| trf_1_4 | Bra003 | 16. |   |   |    |     |     | GGGAUUGUAGUUCAAU | ACCAGUUGAAUUACAA | Cleava |   |
| 49      | 753    | 1.5 | 2 | 1 | 20 | 284 | 303 | UGGU             | UCCU             | ge     | 1 |
| trf_1_4 | Bra003 | 16. |   |   |    |     |     | GGGAUUGUAGUUCAAU | ACCAGUUGAAUUACAA | Cleava |   |
| 50      | 753    | 1.5 | 2 | 1 | 20 | 284 | 303 | UGGU             | UCCU             | ge     | 1 |
| trf_1_4 | Bra003 | 16. |   |   |    |     |     | GGGAUUGUAGUUCAAU | ACCAGUUGAAUUACAA | Cleava |   |
| 51      | 753    | 1.5 | 2 | 1 | 20 | 284 | 303 | UGGU             | UCCU             | ge     | 1 |
| trf_1_4 | Bra003 | 16. |   |   |    |     |     | GGGAUUGUAGUUCAAU | ACCAGUUGAAUUACAA | Cleava |   |
| 53      | 753    | 1.5 | 2 | 1 | 20 | 284 | 303 | UGGU             | UCCU             | ge     | 1 |
| trf_1_4 | Bra003 | 16. |   |   |    |     |     | GGGAUUGUAGUUCAAU | ACCAGUUGAAUUACAA | Cleava |   |
| 54      | 753    | 2.5 | 2 | 1 | 20 | 284 | 303 | CGGU             | UCCU             | ge     | 1 |
| trf_1_4 | Bra003 | 16. |   |   |    |     |     | GGGAUUGUAGUUCAAU | ACCAGUUGAAUUACAA | Cleava |   |
| 55      | 753    | 1.5 | 2 | 1 | 20 | 284 | 303 | UGGU             | UCCU             | ge     | 1 |
| trf_1_4 | Bra003 | 16. |   |   |    |     |     | GGGAUUGUAGUUCAAU | ACCAGUUGAAUUACAA | Cleava |   |
| 56      | 753    | 2.5 | 2 | 1 | 20 | 284 | 303 | UGGA             | UCCU             | ge     | 1 |

|         |        |     |   |   |    |      |      |                   |                  |          |   |
|---------|--------|-----|---|---|----|------|------|-------------------|------------------|----------|---|
| trf_1_4 | Bra003 | 16. |   |   |    |      |      | GGGAUUGUAGUUCAAU  | AACCAGUUGAAUUACA | Cleavage | 1 |
| 57      | 753    | 1.5 | 2 | 1 | 21 | 283  | 303  | UGGUU             | AUCCU            | ge       |   |
| trf_1_4 | Bra003 | 16. |   |   |    |      |      | GGGAUUGUAGUUCAAU  | ACCAGUUGAAUUACAA | Cleavage | 1 |
| 58      | 753    | 1.5 | 2 | 1 | 20 | 284  | 303  | UGGU              | UCCU             | ge       |   |
| trf_1_4 | Bra003 | 16. |   |   |    |      |      | GGGAUUGUAGUUCAAU  | ACCAGUUGAAUUACAA | Cleavage | 1 |
| 59      | 753    | 2.5 | 2 | 1 | 20 | 284  | 303  | CGGU              | UCCU             | ge       |   |
| trf_1_4 | Bra003 | 16. |   |   |    |      |      | NGGAUUGUAGUUCAAU  | ACCAGUUGAAUUACAA | Cleavage | 1 |
| 61      | 753    | 2   | 2 | 1 | 20 | 284  | 303  | UGGU              | UCCU             | ge       |   |
| trf_1_4 | Bra003 | 16. |   |   |    |      |      | UGGAUUGUAGUUCAAU  | ACCAGUUGAAUUACAA | Cleavage | 1 |
| 62      | 753    | 2   | 2 | 1 | 20 | 284  | 303  | UGGU              | UCCU             | ge       |   |
| trf_1_4 | Bra003 | 16. |   |   |    |      |      | GGGAUUGUAGUUCAAU  | ACCAGUUGAAUUACAA | Cleavage | 1 |
| 63      | 753    | 1.5 | 2 | 1 | 20 | 284  | 303  | UGGU              | UCCU             | ge       |   |
| trf_1_4 | Bra003 | 16. |   |   |    |      |      | GGGAUUGUAGUUAAAU  | ACCAGUUGAAUUACAA | Cleavage | 1 |
| 64      | 753    | 2.5 | 2 | 1 | 20 | 284  | 303  | UGGU              | UCCU             | ge       |   |
| trf_1_4 | Bra003 | 16. |   |   |    |      |      | GGGAUUGUAGUUCAAU  | ACCAGUUGAAUUACAA | Cleavage | 1 |
| 65      | 753    | 2.5 | 2 | 1 | 20 | 284  | 303  | UGGA              | UCCU             | ge       |   |
| trf_1_4 | Bra003 | 16. |   |   |    |      |      | UGGAUUGUAGUUCAAU  | ACCAGUUGAAUUACAA | Cleavage | 1 |
| 66      | 753    | 2   | 2 | 1 | 20 | 284  | 303  | UGGU              | UCCU             | ge       |   |
| trf_1_4 | Bra003 | 16. |   |   |    |      |      | GGGAUUGUAGUUCAAU  | GAACCAGUUGAAUUAC | Cleavage | 1 |
| 67      | 753    | 1.5 | 2 | 1 | 22 | 282  | 303  | UGGUCC            | AAUCCU           | ge       |   |
| trf_1_4 | Bra003 | 16. |   |   |    |      |      | GGGAUUGUAGUUCAAU  | AACCAGUUGAAUUACA | Cleavage | 1 |
| 68      | 753    | 1.5 | 2 | 1 | 21 | 283  | 303  | UGGUU             | AUCCU            | ge       |   |
| trf_1_4 | Bra003 | 16. |   |   |    |      |      | GGGAUUGUAGUUCAAU  | ACCAGUUGAAUUACAA | Cleavage | 1 |
| 69      | 753    | 2.5 | 2 | 1 | 20 | 284  | 303  | UGGC              | UCCU             | ge       |   |
| trf_1_4 | Bra003 | 16. |   |   |    |      |      | NGGAUUGUAGUUCAAU  | ACCAGUUGAAUUACAA | Cleavage | 1 |
| 70      | 753    | 3   | 2 | 1 | 20 | 284  | 303  | UGGA              | UCCU             | ge       |   |
| trf_1_4 | Bra003 | 16. |   |   |    |      |      | GGGAUUGUAGUUCAAU  | GAACCAGUUGAAUUAC | Cleavage | 1 |
| 71      | 753    | 1.5 | 2 | 1 | 22 | 282  | 303  | UGGUCC            | AAUCCU           | ge       |   |
| trf_1_1 | Bra004 | 20. |   |   |    |      |      | CCGACCUUAGCUCAGUU | GUUAACUGGGCUAAGG | Cleavage | 1 |
| 82      | 481    | 3   | 0 | 1 | 20 | 1660 | 1679 | GGU               | UCGC             | ge       |   |
| trf_1_4 | Bra004 | 20. |   |   |    |      |      | CCGACCUUAGCUCAGUU | GUUAACUGGGCUAAGG | Cleavage | 1 |
| 76      | 481    | 3   | 0 | 1 | 20 | 1660 | 1679 | GGU               | UCGC             | ge       |   |
| trf_1_4 | Bra004 | 20. |   |   |    |      |      | CCGACCUUAGCUCAGUU | GUUAACUGGGCUAAGG | Cleavage | 1 |
| 78      | 481    | 3   | 0 | 1 | 20 | 1660 | 1679 | GGU               | UCGC             | ge       |   |

|         |        |     |   |   |    |      |      |                   |                   |        |   |
|---------|--------|-----|---|---|----|------|------|-------------------|-------------------|--------|---|
| trf_1_4 | Bra004 | 20. |   |   |    |      |      | CCGACCUUAGCUCAGUU | GUUAACUGGGCUAAGG  | Cleava |   |
| 79      | 481    | 3   | 0 | 1 | 20 | 1660 | 1679 | GGU               | UCGC              | ge     | 1 |
| trf_1_5 | Bra004 | 20. |   |   |    |      |      | CCGACCUUAGCUCAGUU | GUUAACUGGGCUAAGG  | Cleava |   |
| 20      | 481    | 3   | 0 | 1 | 20 | 1660 | 1679 | GGU               | UCGC              | ge     | 1 |
| trf_1_5 | Bra005 | 13. |   |   |    |      |      | GCUGGAGU-         | AACCAACUGAUCUCACU | Transl |   |
| 29      | 116    | 3   | 5 | 1 | 21 | 233  | 254  | AGCUCAGUUGGUU     | CCAGC             | ation  | 1 |
| trf_1_4 | Bra006 | 21. |   |   |    |      |      | GGGAUUGUAGUUCAAU  | GGCAGUUGAUCUACAA  | Transl |   |
| 60      | 584    | 3   | 1 | 1 | 20 | 1526 | 1545 | UGUC              | UUUC              | ation  | 1 |
|         | Bra007 | 14. |   |   |    |      |      | GCACCAGUGGUCUAGU  | UUACUACUGGACCUUU  | Cleava |   |
| trf_1_4 | 154    | 2.5 | 1 | 1 | 21 | 510  | 530  | GGUAG             | GGUGC             | ge     | 1 |
|         | Bra007 | 14. |   |   |    |      |      | GCACCAGUGGUCUAGU  | UUACUACUGGACCUUU  | Cleava |   |
| trf_1_7 | 154    | 2.5 | 1 | 1 | 21 | 510  | 530  | GGUAG             | GGUGC             | ge     | 1 |
| trf_1_6 | Bra007 | 14. |   |   |    |      |      | GCACCAGUGGUCUAGU  | UUACUACUGGACCUUU  | Cleava |   |
| 8       | 154    | 2.5 | 1 | 1 | 21 | 510  | 530  | GGUAG             | GGUGC             | ge     | 1 |
| trf_1_6 | Bra007 | 14. |   |   |    |      |      | GCACCAGUGGUCUAGU  | UUACUACUGGACCUUU  | Cleava |   |
| 9       | 154    | 2.5 | 1 | 1 | 21 | 510  | 530  | GGUAG             | GGUGC             | ge     | 1 |
| trf_1_8 | Bra007 | 14. |   |   |    |      |      | GCACCAGUGGUCUAGU  | UUACUACUGGACCUUU  | Cleava |   |
| 6       | 154    | 2.5 | 1 | 1 | 21 | 510  | 530  | GGUAG             | GGUGC             | ge     | 1 |
| trf_1_8 | Bra007 | 14. |   |   |    |      |      | GCACCAGUGGUCUAGU  | UUACUACUGGACCUUU  | Cleava |   |
| 7       | 154    | 2.5 | 1 | 1 | 21 | 510  | 530  | GGUAG             | GGUGC             | ge     | 1 |
| trf_1_1 | Bra007 | 14. |   |   |    |      |      | GCACCAGUGGUCUAGU  | UUACUACUGGACCUUU  | Cleava |   |
| 27      | 154    | 2.5 | 1 | 1 | 21 | 510  | 530  | GGUAG             | GGUGC             | ge     | 1 |
| trf_1_1 | Bra007 | 14. |   |   |    |      |      | GCACCAGUGGUCUAGU  | UUACUACUGGACCUUU  | Cleava |   |
| 41      | 154    | 2.5 | 1 | 1 | 21 | 510  | 530  | GGUAG             | GGUGC             | ge     | 1 |
| trf_1_1 | Bra007 | 14. |   |   |    |      |      | GCACCAGUGGUCUAGU  | UUACUACUGGACCUUU  | Cleava |   |
| 50      | 154    | 2.5 | 1 | 1 | 21 | 510  | 530  | GGUAG             | GGUGC             | ge     | 1 |
| trf_1_1 | Bra007 | 14. |   |   |    |      |      | GCACCAGUGGUCUAGU  | UUACUACUGGACCUUU  | Cleava |   |
| 67      | 154    | 2.5 | 1 | 1 | 21 | 510  | 530  | GGUAG             | GGUGC             | ge     | 1 |
| trf_1_2 | Bra007 | 14. |   |   |    |      |      | GCACCAGUGGUCUAGU  | UUACUACUGGACCUUU  | Cleava |   |
| 50      | 154    | 2.5 | 1 | 1 | 21 | 510  | 530  | GGUAG             | GGUGC             | ge     | 1 |
| trf_1_2 | Bra007 | 14. |   |   |    |      |      | GCACCAGUGGUCUAGU  | UUACUACUGGACCUUU  | Cleava |   |
| 62      | 154    | 2.5 | 1 | 1 | 21 | 510  | 530  | GGUAG             | GGUGC             | ge     | 1 |
| trf_1_2 | Bra007 | 14. |   |   |    |      |      | GCACCAGUGGUCUAGU  | UUACUACUGGACCUUU  | Cleava |   |
| 80      | 154    | 2.5 | 1 | 1 | 21 | 510  | 530  | GGUAG             | GGUGC             | ge     | 1 |

|         |        |     |   |   |    |      |      |                   |                   |        |   |
|---------|--------|-----|---|---|----|------|------|-------------------|-------------------|--------|---|
| trf_1_3 | Bra007 | 14. |   |   |    |      |      | GCACCAGUGGUCUAGU  | UUACUACUGGACCUUU  | Cleava |   |
| 29      | 154    | 2.5 | 1 | 1 | 21 | 510  | 530  | GGUAG             | GGUGC             | ge     | 1 |
| trf_1_3 | Bra007 | 14. |   |   |    |      |      | GCACCAGUGGUCUAGU  | UUACUACUGGACCUUU  | Cleava |   |
| 30      | 154    | 2.5 | 1 | 1 | 21 | 510  | 530  | GGUAG             | GGUGC             | ge     | 1 |
| trf_1_4 | Bra007 | 14. |   |   |    |      |      | GCACCAGUGGUCUAGU  | UUACUACUGGACCUUU  | Cleava |   |
| 12      | 154    | 2.5 | 1 | 1 | 21 | 510  | 530  | GGUAG             | GGUGC             | ge     | 1 |
| trf_1_4 | Bra007 | 14. |   |   |    |      |      | GCACCAGUGGUCUAGU  | UUACUACUGGACCUUU  | Cleava |   |
| 80      | 154    | 2.5 | 1 | 1 | 21 | 510  | 530  | GGUAG             | GGUGC             | ge     | 1 |
| trf_1_5 | Bra007 | 14. |   |   |    |      |      | GCACCAGUGGUCUAGU  | UUACUACUGGACCUUU  | Cleava |   |
| 13      | 154    | 2.5 | 1 | 1 | 21 | 510  | 530  | GGUAG             | GGUGC             | ge     | 1 |
| trf_1_5 | Bra007 | 14. |   |   |    |      |      | GCACCAGUGGUCUAGU  | UUACUACUGGACCUUU  | Cleava |   |
| 75      | 154    | 2.5 | 1 | 1 | 21 | 510  | 530  | GGUAG             | GGUGC             | ge     | 1 |
| trf_1_4 | Bra007 | 21. |   |   |    |      |      | GGGAUUGUAGUUAAAU  | AACAGUUUAACAACAAU | Transl |   |
| 64      | 277    | 3   | 1 | 1 | 20 | 926  | 945  | UGGU              | CCU               | ation  | 1 |
| trf_1_2 | Bra007 | 16. |   |   |    |      |      | GCGUCCAUUGUCUAAU  | AUCCGUCAGACAAUGGA | Cleava |   |
| 71      | 620    | 3   | 3 | 1 | 20 | 292  | 311  | GGAU              | AGC               | ge     | 1 |
| trf_1_2 | Bra007 | 16. |   |   |    |      |      | GCGUCCAUUGUCUAAU  | AUCCGUCAGACAAUGGA | Cleava |   |
| 72      | 620    | 3   | 3 | 1 | 20 | 292  | 311  | GGAU              | AGC               | ge     | 1 |
| trf_1_2 | Bra007 | 16. |   |   |    |      |      | GCGUCCAUUGUCUAAU  | AUCCGUCAGACAAUGGA | Cleava |   |
| 73      | 620    | 3   | 3 | 1 | 20 | 292  | 311  | GGAU              | AGC               | ge     | 1 |
| trf_1_2 | Bra007 | 16. |   |   |    |      |      | GCGUCCAUUGUCUAAU  | AUCCGUCAGACAAUGGA | Cleava |   |
| 74      | 620    | 3   | 3 | 1 | 20 | 292  | 311  | GGAU              | AGC               | ge     | 1 |
| trf_1_2 | Bra007 | 16. |   |   |    |      |      | GCGUCCAUUGUCUAAU  | AUCCGUCAGACAAUGGA | Cleava |   |
| 75      | 620    | 3   | 3 | 1 | 20 | 292  | 311  | GGAU              | AGC               | ge     | 1 |
| trf_1_2 | Bra007 | 16. |   |   |    |      |      | GCGUCCAUUGUCUAAU  | AUCCGUCAGACAAUGGA | Cleava |   |
| 76      | 620    | 3   | 3 | 1 | 20 | 292  | 311  | GGAU              | AGC               | ge     | 1 |
| trf_1_2 | Bra007 | 16. |   |   |    |      |      | GCGUCCAUUGUCUAAU  | AUCCGUCAGACAAUGGA | Cleava |   |
| 78      | 620    | 3   | 3 | 1 | 20 | 292  | 311  | GGAU              | AGC               | ge     | 1 |
| trf_1_2 | Bra007 | 16. |   |   |    |      |      | GCGUCCAUUGUCUAAU  | AUCCGUCAGACAAUGGA | Cleava |   |
| 79      | 620    | 3   | 3 | 1 | 20 | 292  | 311  | GGAU              | AGC               | ge     | 1 |
| trf_1_5 | Bra008 | 14. |   |   |    |      |      | UUAGGUUCAAUCCUA   | UCGAUGGGGAUUGAAC  | Transl |   |
| 77      | 706    | 3   | 7 | 1 | 20 | 1321 | 1340 | UUGG              | CUAA              | ation  | 1 |
| trf_1_1 | Bra009 | 16. |   |   |    |      |      | CCGACCUUAGCUCAGUU | UCAAACUGAGCCAAGGU | Transl |   |
| 82      | 057    | 3   | 0 | 1 | 20 | 737  | 756  | GGU               | CGG               | ation  | 1 |



|         |        |     |   |   |    |     |     |                   |                   |        |   |
|---------|--------|-----|---|---|----|-----|-----|-------------------|-------------------|--------|---|
| trf_1_4 | Bra009 | 16. |   |   |    |     |     | CCGACCUUAGCUCAGUU | UCAAACUGAGCCAAGGU | Transl |   |
| 76      | 057    | 3   | 0 | 1 | 20 | 737 | 756 | GGU               | CGG               | ation  | 1 |
| trf_1_4 | Bra009 | 16. |   |   |    |     |     | CCGACCUUAGCUCAGUU | UCAAACUGAGCCAAGGU | Transl |   |
| 78      | 057    | 3   | 0 | 1 | 20 | 737 | 756 | GGU               | CGG               | ation  | 1 |
| trf_1_4 | Bra009 | 16. |   |   |    |     |     | CCGACCUUAGCUCAGUU | UCAAACUGAGCCAAGGU | Transl |   |
| 79      | 057    | 3   | 0 | 1 | 20 | 737 | 756 | GGU               | CGG               | ation  | 1 |
| trf_1_5 | Bra009 | 16. |   |   |    |     |     | CCGACCUUAGCUCAGUU | UCAAACUGAGCCAAGGU | Transl |   |
| 20      | 057    | 3   | 0 | 1 | 20 | 737 | 756 | GGU               | CGG               | ation  | 1 |
| trf_1_4 | Bra009 | 15. |   |   |    |     |     | UGGAUUGUAGUUCAAU  | CUCAGUUGAACUUCAA  | Cleava |   |
| 25      | 115    | 3   | 2 | 1 | 20 | 602 | 621 | UGGU              | UCCA              | ge     | 1 |
| trf_1_4 | Bra009 | 15. |   |   |    |     |     | GGGAUUGUAGUUCAAU  | CUCAGUUGAACUUCAA  | Cleava |   |
| 33      | 115    | 3   | 2 | 1 | 20 | 602 | 621 | UGGG              | UCCA              | ge     | 1 |
| trf_1_4 | Bra009 | 15. |   |   |    |     |     | GGGAUUGUAGUUCAAU  | CUCAGUUGAACUUCAA  | Cleava |   |
| 41      | 115    | 3   | 2 | 1 | 20 | 602 | 621 | UGGG              | UCCA              | ge     | 1 |
| trf_1_4 | Bra009 | 15. |   |   |    |     |     | GGGAUUGUAGUUCAAU  | CUCAGUUGAACUUCAA  | Cleava |   |
| 42      | 115    | 3   | 2 | 1 | 20 | 602 | 621 | UGGG              | UCCA              | ge     | 1 |
| trf_1_4 | Bra009 | 15. |   |   |    |     |     | UGGAUUGUAGUUCAAU  | CUCAGUUGAACUUCAA  | Cleava |   |
| 62      | 115    | 3   | 2 | 1 | 20 | 602 | 621 | UGGU              | UCCA              | ge     | 1 |
| trf_1_4 | Bra009 | 15. |   |   |    |     |     | UGGAUUGUAGUUCAAU  | CUCAGUUGAACUUCAA  | Cleava |   |
| 66      | 115    | 3   | 2 | 1 | 20 | 602 | 621 | UGGU              | UCCA              | ge     | 1 |
| trf_1_5 | Bra009 | 18. |   |   |    |     |     | GGUUCAAAUCCUUAUUG | UCCGUCCAAGAGGAUU  | Cleava |   |
| 80      | 190    | 2.5 | 3 | 1 | 22 | 559 | 580 | GACGCA            | UCAACC            | ge     | 1 |
| trf_1_5 | Bra009 | 21. |   |   |    |     |     | UUAGGUUCAAUCCUA   | UGCAGUCGAUAGGAUA  | Transl |   |
| 77      | 377    | 3   | 2 | 1 | 25 | 578 | 602 | UUGGACGCA         | UGAGCCUGA         | ation  | 1 |
| trf_1_3 | Bra009 | 14. |   |   |    |     |     | GGGGAUGUAGCUCAGA  | UUAUCAUCUGGGCUUC  | Cleava |   |
| 1       | 876    | 3   | 9 | 1 | 22 | 16  | 37  | UGGUAG            | GUCCUC            | ge     | 1 |
| trf_1_3 | Bra009 | 14. |   |   |    |     |     | GGGGAUGUAGCUCAGA  | AUCAUCUGGGCUUCGU  | Cleava |   |
| 5       | 876    | 3   | 9 | 1 | 20 | 18  | 37  | UGGU              | CCUC              | ge     | 1 |
| trf_1_6 | Bra009 | 14. |   |   |    |     |     | GGGGAUGUAGCUCAGA  | UUAUCAUCUGGGCUUC  | Cleava |   |
| 0       | 876    | 3   | 9 | 1 | 22 | 16  | 37  | UGGUAG            | GUCCUC            | ge     | 1 |
| trf_1_6 | Bra009 | 14. |   |   |    |     |     | GGGGAUGUAGCUCAGA  | CGUUAUCAUCUGGGCU  | Cleava |   |
| 2       | 876    | 3   | 9 | 1 | 24 | 14  | 37  | UGGUAGAG          | UCGUCCUC          | ge     | 1 |
| trf_1_9 | Bra009 | 14. |   |   |    |     |     | GGGGAUGUAGCUCAGA  | UUAUCAUCUGGGCUUC  | Cleava |   |
| 0       | 876    | 3   | 9 | 1 | 22 | 16  | 37  | UGGUAG            | GUCCUC            | ge     | 1 |

|         |        |     |   |   |    |    |                  |                  |        |   |
|---------|--------|-----|---|---|----|----|------------------|------------------|--------|---|
| trf_1_1 | Bra009 | 14. |   |   |    |    | GGGGAUGUAGCUCAGA | UUAUCAUCUGGGCUUC | Cleava |   |
| 33      | 876    | 3   | 9 | 1 | 22 | 16 | 37 UGGUAG        | GUCCUC           | ge     | 1 |
| trf_1_1 | Bra009 | 14. |   |   |    |    | GGGGAUGUAGCUCAGA | AUCAUCUGGGCUUCGU | Cleava |   |
| 37      | 876    | 3   | 9 | 1 | 20 | 18 | 37 UGGU          | CCUC             | ge     | 1 |
| trf_1_1 | Bra009 | 14. |   |   |    |    | GGGGAUGUAGCUCAGA | UAUCAUCUGGGCUUCG | Cleava |   |
| 38      | 876    | 3   | 9 | 1 | 21 | 17 | 37 UGGUA         | UCCUC            | ge     | 1 |
| trf_1_1 | Bra009 | 14. |   |   |    |    | GGGGAUGUAGCUCAGA | UUAUCAUCUGGGCUUC | Cleava |   |
| 53      | 876    | 3   | 9 | 1 | 22 | 16 | 37 UGGUAG        | GUCCUC           | ge     | 1 |
| trf_1_1 | Bra009 | 14. |   |   |    |    | GGGGAUGUAGCUCAGA | CGUUAUCAUCUGGGCU | Cleava |   |
| 54      | 876    | 3   | 9 | 1 | 24 | 14 | 37 UGGUAGAG      | UCGUCCUC         | ge     | 1 |
| trf_1_1 | Bra009 | 14. |   |   |    |    | GGGGAUGUAGCUCAGA | UUAUCAUCUGGGCUUC | Cleava |   |
| 60      | 876    | 3   | 9 | 1 | 22 | 16 | 37 UGGUAG        | GUCCUC           | ge     | 1 |
| trf_1_1 | Bra009 | 14. |   |   |    |    | GGGGAUGUAGCUCAGA | CGUUAUCAUCUGGGCU | Cleava |   |
| 62      | 876    | 3   | 9 | 1 | 24 | 14 | 37 UGGUAGAG      | UCGUCCUC         | ge     | 1 |
| trf_1_1 | Bra009 | 14. |   |   |    |    | GGGGAUGUAGCUCAGA | UUAUCAUCUGGGCUUC | Cleava |   |
| 69      | 876    | 3   | 9 | 1 | 22 | 16 | 37 UGGUAG        | GUCCUC           | ge     | 1 |
| trf_1_1 | Bra009 | 14. |   |   |    |    | GGGGAUGUAGCUCAGA | CGUUAUCAUCUGGGCU | Cleava |   |
| 73      | 876    | 3   | 9 | 1 | 24 | 14 | 37 UGGUAGAG      | UCGUCCUC         | ge     | 1 |
| trf_1_1 | Bra009 | 14. |   |   |    |    | GGGGAUGUAGCUCAGA | UUAUCAUCUGGGCUUC | Cleava |   |
| 83      | 876    | 3   | 9 | 1 | 22 | 16 | 37 UGGUAG        | GUCCUC           | ge     | 1 |
| trf_1_2 | Bra009 | 14. |   |   |    |    | GGGGAUGUAGCUCAGA | UUAUCAUCUGGGCUUC | Cleava |   |
| 33      | 876    | 3   | 9 | 1 | 22 | 16 | 37 UGGUAG        | GUCCUC           | ge     | 1 |
| trf_1_2 | Bra009 | 14. |   |   |    |    | GGGGAUGUAGCUCAGA | CGUUAUCAUCUGGGCU | Cleava |   |
| 36      | 876    | 3   | 9 | 1 | 24 | 14 | 37 UGGUAGAG      | UCGUCCUC         | ge     | 1 |
| trf_1_2 | Bra009 | 14. |   |   |    |    | GGGGAUGUAGCUCAGA | UUAUCAUCUGGGCUUC | Cleava |   |
| 44      | 876    | 3   | 9 | 1 | 22 | 16 | 37 UGGUAG        | GUCCUC           | ge     | 1 |
| trf_1_2 | Bra009 | 14. |   |   |    |    | GGGGAUGUAGCUCAGA | CGUUAUCAUCUGGGCU | Cleava |   |
| 47      | 876    | 3   | 9 | 1 | 24 | 14 | 37 UGGUAGAG      | UCGUCCUC         | ge     | 1 |
| trf_1_2 | Bra009 | 14. |   |   |    |    | GGGGAUGUAGCUCAGA | UUAUCAUCUGGGCUUC | Cleava |   |
| 66      | 876    | 3   | 9 | 1 | 22 | 16 | 37 UGGUAG        | GUCCUC           | ge     | 1 |
| trf_1_2 | Bra009 | 14. |   |   |    |    | GGGGAUGUAGCUCAGA | UUAUCAUCUGGGCUUC | Cleava |   |
| 86      | 876    | 3   | 9 | 1 | 22 | 16 | 37 UGGUAG        | GUCCUC           | ge     | 1 |
| trf_1_2 | Bra009 | 14. |   |   |    |    | GGGGAUGUAGCUCAGA | UUAUCAUCUGGGCUUC | Cleava |   |
| 93      | 876    | 3   | 9 | 1 | 22 | 16 | 37 UGGUAG        | GUCCUC           | ge     | 1 |

|         |        |     |   |   |    |    |    |                  |                  |        |   |
|---------|--------|-----|---|---|----|----|----|------------------|------------------|--------|---|
| trf_1_2 | Bra009 | 14. |   |   |    |    |    | GGGGAUGUAGCUCAGA | CGUUAUCAUCUGGGCU | Cleava |   |
| 97      | 876    | 3   | 9 | 1 | 24 | 14 | 37 | UGGUAGAG         | UCGUCCUC         | ge     | 1 |
| trf_1_3 | Bra009 | 14. |   |   |    |    |    | GGGGAUGUAGCUCAGA | UUAUCAUCUGGGCUUC | Cleava |   |
| 02      | 876    | 3   | 9 | 1 | 22 | 16 | 37 | UGGUAG           | GUCCUC           | ge     | 1 |
| trf_1_3 | Bra009 | 14. |   |   |    |    |    | GGGGAUGUAGCUCAGA | UUAUCAUCUGGGCUUC | Cleava |   |
| 07      | 876    | 3   | 9 | 1 | 22 | 16 | 37 | UGGUAG           | GUCCUC           | ge     | 1 |
| trf_1_3 | Bra009 | 14. |   |   |    |    |    | GGGGAUGUAGCUCAGA | UUAUCAUCUGGGCUUC | Cleava |   |
| 14      | 876    | 3   | 9 | 1 | 22 | 16 | 37 | UGGUAG           | GUCCUC           | ge     | 1 |
| trf_1_3 | Bra009 | 14. |   |   |    |    |    | GGGGAUGUAGCUCAGA | UUAUCAUCUGGGCUUC | Cleava |   |
| 22      | 876    | 3   | 9 | 1 | 22 | 16 | 37 | UGGUAG           | GUCCUC           | ge     | 1 |
| trf_1_3 | Bra009 | 14. |   |   |    |    |    | GGGGAUGUAGCUCAGA | CGUUAUCAUCUGGGCU | Cleava |   |
| 23      | 876    | 3   | 9 | 1 | 24 | 14 | 37 | UGGUAGAG         | UCGUCCUC         | ge     | 1 |
| trf_1_3 | Bra009 | 14. |   |   |    |    |    | GGGGAUGUAGCUCAGA | UUAUCAUCUGGGCUUC | Cleava |   |
| 32      | 876    | 3   | 9 | 1 | 22 | 16 | 37 | UGGUAG           | GUCCUC           | ge     | 1 |
| trf_1_3 | Bra009 | 14. |   |   |    |    |    | GGGGAUGUAGCUCAGA | CGUUAUCAUCUGGGCU | Cleava |   |
| 38      | 876    | 3   | 9 | 1 | 24 | 14 | 37 | UGGUAGAG         | UCGUCCUC         | ge     | 1 |
| trf_1_3 | Bra009 | 14. |   |   |    |    |    | GGGGAUGUAGCUCAGA | UUAUCAUCUGGGCUUC | Cleava |   |
| 41      | 876    | 3   | 9 | 1 | 22 | 16 | 37 | UGGUAG           | GUCCUC           | ge     | 1 |
| trf_1_3 | Bra009 | 14. |   |   |    |    |    | GGGGAUGUAGCUCAGA | UUAUCAUCUGGGCUUC | Cleava |   |
| 51      | 876    | 3   | 9 | 1 | 22 | 16 | 37 | UGGUAG           | GUCCUC           | ge     | 1 |
| trf_1_3 | Bra009 | 14. |   |   |    |    |    | GGGGAUGUAGCUCAGA | AUCAUCUGGGCUUCGU | Cleava |   |
| 53      | 876    | 3   | 9 | 1 | 20 | 18 | 37 | UGGU             | CCUC             | ge     | 1 |
| trf_1_3 | Bra009 | 14. |   |   |    |    |    | GGGGAUGUAGCUCAGA | UUAUCAUCUGGGCUUC | Cleava |   |
| 62      | 876    | 3   | 9 | 1 | 22 | 16 | 37 | UGGUAG           | GUCCUC           | ge     | 1 |
| trf_1_3 | Bra009 | 14. |   |   |    |    |    | GGGGAUGUAGCUCAGA | CGUUAUCAUCUGGGCU | Cleava |   |
| 66      | 876    | 3   | 9 | 1 | 24 | 14 | 37 | UGGUAGAG         | UCGUCCUC         | ge     | 1 |
| trf_1_3 | Bra009 | 14. |   |   |    |    |    | GGGGAUGUAGCUCAGA | UUAUCAUCUGGGCUUC | Cleava |   |
| 75      | 876    | 3   | 9 | 1 | 22 | 16 | 37 | UGGUAG           | GUCCUC           | ge     | 1 |
| trf_1_3 | Bra009 | 14. |   |   |    |    |    | GGGGAUGUAGCUCAGA | CGUUAUCAUCUGGGCU | Cleava |   |
| 79      | 876    | 3   | 9 | 1 | 24 | 14 | 37 | UGGUAGAG         | UCGUCCUC         | ge     | 1 |
| trf_1_3 | Bra009 | 14. |   |   |    |    |    | GGGGAUGUAGCUCAGA | UUAUCAUCUGGGCUUC | Cleava |   |
| 82      | 876    | 3   | 9 | 1 | 22 | 16 | 37 | UGGUAG           | GUCCUC           | ge     | 1 |
| trf_1_3 | Bra009 | 14. |   |   |    |    |    | GGGGAUGUAGCUCAGA | CGUUAUCAUCUGGGCU | Cleava |   |
| 83      | 876    | 3   | 9 | 1 | 24 | 14 | 37 | UGGUAGAG         | UCGUCCUC         | ge     | 1 |

|         |        |     |   |   |    |      |      |                   |                   |        |   |
|---------|--------|-----|---|---|----|------|------|-------------------|-------------------|--------|---|
| trf_1_3 | Bra009 | 14. |   |   |    |      |      | GGGGAUGUAGCUCAGA  | UUAUCAUCUGGGCUUC  | Cleava |   |
| 91      | 876    | 3   | 9 | 1 | 22 | 16   | 37   | UGGUAG            | GUCCUC            | ge     | 1 |
| trf_1_3 | Bra009 | 14. |   |   |    |      |      | GGGGAUGUAGCUCAGA  | AUCAUCUGGGCUUCGU  | Cleava |   |
| 92      | 876    | 3   | 9 | 1 | 20 | 18   | 37   | UGGU              | CCUC              | ge     | 1 |
| trf_1_3 | Bra009 | 14. |   |   |    |      |      | GGGGAUGUAGCUCAGA  | CGUUAUCAUCUGGGCU  | Cleava |   |
| 93      | 876    | 3   | 9 | 1 | 24 | 14   | 37   | UGGUAGAG          | UCGUCCUC          | ge     | 1 |
| trf_1_4 | Bra009 | 14. |   |   |    |      |      | GGGGAUGUAGCUCAGA  | UUAUCAUCUGGGCUUC  | Cleava |   |
| 00      | 876    | 3   | 9 | 1 | 22 | 16   | 37   | UGGUAG            | GUCCUC            | ge     | 1 |
| trf_1_4 | Bra009 | 14. |   |   |    |      |      | GGGGAUGUAGCUCAGA  | AUCAUCUGGGCUUCGU  | Cleava |   |
| 04      | 876    | 3   | 9 | 1 | 20 | 18   | 37   | UGGU              | CCUC              | ge     | 1 |
| trf_1_4 | Bra009 | 14. |   |   |    |      |      | GGGGAUGUAGCUCAGA  | UUAUCAUCUGGGCUUC  | Cleava |   |
| 08      | 876    | 3   | 9 | 1 | 22 | 16   | 37   | UGGUAG            | GUCCUC            | ge     | 1 |
| trf_1_4 | Bra009 | 14. |   |   |    |      |      | GGGGAUGUAGCUCAGA  | AUCAUCUGGGCUUCGU  | Cleava |   |
| 10      | 876    | 3   | 9 | 1 | 20 | 18   | 37   | UGGU              | CCUC              | ge     | 1 |
| trf_1_4 | Bra009 | 14. |   |   |    |      |      | GGGGAUGUAGCUCAGA  | UUAUCAUCUGGGCUUC  | Cleava |   |
| 82      | 876    | 3   | 9 | 1 | 22 | 16   | 37   | UGGUAG            | GUCCUC            | ge     | 1 |
| trf_1_4 | Bra009 | 14. |   |   |    |      |      | GGGGAUGUAGCUCAGA  | AUCAUCUGGGCUUCGU  | Cleava |   |
| 86      | 876    | 3   | 9 | 1 | 20 | 18   | 37   | UGGU              | CCUC              | ge     | 1 |
| trf_1_4 | Bra009 | 14. |   |   |    |      |      | GGGGAUGUAGCUCAGA  | UUAUCAUCUGGGCUUC  | Cleava |   |
| 89      | 876    | 3   | 9 | 1 | 22 | 16   | 37   | UGGUAG            | GUCCUC            | ge     | 1 |
| trf_1_4 | Bra009 | 14. |   |   |    |      |      | GGGGAUGUAGCUCAGA  | AUCAUCUGGGCUUCGU  | Cleava |   |
| 94      | 876    | 3   | 9 | 1 | 20 | 18   | 37   | UGGU              | CCUC              | ge     | 1 |
| trf_1_4 | Bra009 | 14. |   |   |    |      |      | GGGGAUGUAGCUCAGA  | AUCAUCUGGGCUUCGU  | Cleava |   |
| 98      | 876    | 3   | 9 | 1 | 20 | 18   | 37   | UGGU              | CCUC              | ge     | 1 |
| trf_1_4 | Bra009 | 14. |   |   |    |      |      | GGGGAUGUAGCUCAGA  | UUAUCAUCUGGGCUUC  | Cleava |   |
| 99      | 876    | 3   | 9 | 1 | 22 | 16   | 37   | UGGUAG            | GUCCUC            | ge     | 1 |
| trf_1_3 | Bra010 | 19. |   |   |    |      |      | GGGGAUUAUAGCUCAGU | GUUCUCACCAGCAGAGC | Cleava |   |
| 2       | 298    | 3   | 9 | 1 | 25 | 1891 | 1916 | UGGU-AGAGC        | UAUAUUCCA         | ge     | 1 |
| trf_1_3 | Bra010 | 19. |   |   |    |      |      | GGGGAUUAUAGCUCAGU | ACCAGCAGAGCUAUAU  | Cleava |   |
| 3       | 298    | 3   | 9 | 1 | 20 | 1897 | 1916 | UGGU              | UCCA              | ge     | 1 |
| trf_1_3 | Bra010 | 19. |   |   |    |      |      | GGGGAUUAUAGCUCAGU | UUCUCACCAGCAGAGCU | Cleava |   |
| 4       | 298    | 3   | 9 | 1 | 24 | 1892 | 1916 | UGGU-AGAG         | AUAUUCCA          | ge     | 1 |
| trf_1_3 | Bra010 | 19. |   |   |    |      |      | GGGGAUUAUAGCUCAGU | ACCAGCAGAGCUAUAU  | Cleava |   |
| 6       | 298    | 3   | 9 | 1 | 20 | 1897 | 1916 | UGGU              | UCCA              | ge     | 1 |

|         |        |     |   |   |    |      |      |                   |                   |        |   |
|---------|--------|-----|---|---|----|------|------|-------------------|-------------------|--------|---|
| trf_1_5 | Bra010 | 19. |   |   |    |      |      | GGGGAUUAUAGCUCAGU | ACCAGCAGAGCUAUAU  | Cleava |   |
| 9       | 298    | 3   | 9 | 1 | 20 | 1897 | 1916 | UGGU              | UCCA              | ge     | 1 |
| trf_1_6 | Bra010 | 19. |   |   |    |      |      | GGGGAUUAUAGCUCAGU | GUUCUCACCAGCAGAGC | Cleava |   |
| 1       | 298    | 3   | 9 | 1 | 25 | 1891 | 1916 | UGGU-AGAGC        | UAUUAUCCA         | ge     | 1 |
| trf_1_6 | Bra010 | 19. |   |   |    |      |      | GGGGAUUAUAGCUCAGU | ACCAGCAGAGCUAUAU  | Cleava |   |
| 3       | 298    | 3   | 9 | 1 | 20 | 1897 | 1916 | UGGU              | UCCA              | ge     | 1 |
| trf_1_6 | Bra010 | 19. |   |   |    |      |      | GGGGAUUAUAGCUCAGU | ACCAGCAGAGCUAUAU  | Cleava |   |
| 4       | 298    | 3   | 9 | 1 | 20 | 1897 | 1916 | UGGU              | UCCA              | ge     | 1 |
| trf_1_8 | Bra010 | 19. |   |   |    |      |      | GGGGAUUAUAGCUCAGU | ACCAGCAGAGCUAUAU  | Cleava |   |
| 9       | 298    | 3   | 9 | 1 | 20 | 1897 | 1916 | UGGU              | UCCA              | ge     | 1 |
| trf_1_9 | Bra010 | 19. |   |   |    |      |      | GGGGAUUAUAGCUCAGU | GUUCUCACCAGCAGAGC | Cleava |   |
| 1       | 298    | 3   | 9 | 1 | 25 | 1891 | 1916 | UGGU-AGAGC        | UAUUAUCCA         | ge     | 1 |
| trf_1_9 | Bra010 | 19. |   |   |    |      |      | GGGGAUUAUAGCUCAGU | ACCAGCAGAGCUAUAU  | Cleava |   |
| 2       | 298    | 3   | 9 | 1 | 20 | 1897 | 1916 | UGGU              | UCCA              | ge     | 1 |
| trf_1_9 | Bra010 | 19. |   |   |    |      |      | GGGGAUUAUAGCUCAGU | ACCAGCAGAGCUAUAU  | Cleava |   |
| 3       | 298    | 3   | 9 | 1 | 20 | 1897 | 1916 | UGGU              | UCCA              | ge     | 1 |
| trf_1_1 | Bra010 | 19. |   |   |    |      |      | GGGGAUUAUAGCUCAGU | ACCAGCAGAGCUAUAU  | Cleava |   |
| 34      | 298    | 3   | 9 | 1 | 20 | 1897 | 1916 | UGGU              | UCCA              | ge     | 1 |
| trf_1_1 | Bra010 | 19. |   |   |    |      |      | GGGGAUUAUAGCUCAGU | ACCAGCAGAGCUAUAU  | Cleava |   |
| 35      | 298    | 3   | 9 | 1 | 20 | 1897 | 1916 | UGGU              | UCCA              | ge     | 1 |
| trf_1_1 | Bra010 | 19. |   |   |    |      |      | GGGGAUUAUAGCUCAGU | GUUCUCACCAGCAGAGC | Cleava |   |
| 36      | 298    | 3   | 9 | 1 | 25 | 1891 | 1916 | UGGU-AGAGC        | UAUUAUCCA         | ge     | 1 |
| trf_1_1 | Bra010 | 19. |   |   |    |      |      | GGGGAUUAUAGCUCAGU | ACCAGCAGAGCUAUAU  | Cleava |   |
| 39      | 298    | 3   | 9 | 1 | 20 | 1897 | 1916 | UGGU              | UCCA              | ge     | 1 |
| trf_1_1 | Bra010 | 19. |   |   |    |      |      | GGGGAUUAUAGCUCAGU | ACCAGCAGAGCUAUAU  | Cleava |   |
| 51      | 298    | 3   | 9 | 1 | 20 | 1897 | 1916 | UGGU              | UCCA              | ge     | 1 |
| trf_1_1 | Bra010 | 19. |   |   |    |      |      | GGGGAUUAUAGCUCAGU | ACCAGCAGAGCUAUAU  | Cleava |   |
| 52      | 298    | 3   | 9 | 1 | 20 | 1897 | 1916 | UGGU              | UCCA              | ge     | 1 |
| trf_1_1 | Bra010 | 19. |   |   |    |      |      | GGGGAUUAUAGCUCAGU | ACCAGCAGAGCUAUAU  | Cleava |   |
| 55      | 298    | 3   | 9 | 1 | 20 | 1897 | 1916 | UGGU              | UCCA              | ge     | 1 |
| trf_1_1 | Bra010 | 19. |   |   |    |      |      | GGGGAUUAUAGCUCAGU | GUUCUCACCAGCAGAGC | Cleava |   |
| 56      | 298    | 3   | 9 | 1 | 25 | 1891 | 1916 | UGGU-AGAGC        | UAUUAUCCA         | ge     | 1 |
| trf_1_1 | Bra010 | 19. |   |   |    |      |      | GGGGAUUAUAGCUCAGU | GUUCUCACCAGCAGAGC | Cleava |   |
| 61      | 298    | 3   | 9 | 1 | 25 | 1891 | 1916 | UGGU-AGAGC        | UAUUAUCCA         | ge     | 1 |

|         |        |     |   |   |    |      |      |                   |                   |        |   |
|---------|--------|-----|---|---|----|------|------|-------------------|-------------------|--------|---|
| trf_1_1 | Bra010 | 19. |   |   |    |      |      | GGGGAUUAUAGCUCAGU | UUCUCACCAGCAGAGCU | Cleava |   |
| 63      | 298    | 3   | 9 | 1 | 24 | 1892 | 1916 | UGGU-AGAG         | AUAUUCCA          | ge     | 1 |
| trf_1_1 | Bra010 | 19. |   |   |    |      |      | GGGGAUUAUAGCUCAGU | ACCAGCAGAGCUAUAU  | Cleava |   |
| 64      | 298    | 3   | 9 | 1 | 20 | 1897 | 1916 | UGGU              | UCCA              | ge     | 1 |
| trf_1_1 | Bra010 | 19. |   |   |    |      |      | GGGGAUUAUAGCUCAGU | ACCAGCAGAGCUAUAU  | Cleava |   |
| 65      | 298    | 3   | 9 | 1 | 20 | 1897 | 1916 | UGGU              | UCCA              | ge     | 1 |
| trf_1_1 | Bra010 | 19. |   |   |    |      |      | GGGGAUUAUAGCUCAGU | ACCAGCAGAGCUAUAU  | Cleava |   |
| 66      | 298    | 3   | 9 | 1 | 20 | 1897 | 1916 | UGGU              | UCCA              | ge     | 1 |
| trf_1_1 | Bra010 | 19. |   |   |    |      |      | GGGGAUUAUAGCUCAGU | GUUCUCACCAGCAGAGC | Cleava |   |
| 68      | 298    | 3   | 9 | 1 | 25 | 1891 | 1916 | UGGU-AGAGC        | UAUAUUCCA         | ge     | 1 |
| trf_1_1 | Bra010 | 19. |   |   |    |      |      | GGGGAUUAUAGCUCAGU | ACCAGCAGAGCUAUAU  | Cleava |   |
| 70      | 298    | 3   | 9 | 1 | 20 | 1897 | 1916 | UGGU              | UCCA              | ge     | 1 |
| trf_1_1 | Bra010 | 19. |   |   |    |      |      | GGGGAUUAUAGCUCAGU | ACCAGCAGAGCUAUAU  | Cleava |   |
| 71      | 298    | 3   | 9 | 1 | 20 | 1897 | 1916 | UGGU              | UCCA              | ge     | 1 |
| trf_1_1 | Bra010 | 19. |   |   |    |      |      | GGGGAUUAUAGCUCAGU | ACCAGCAGAGCUAUAU  | Cleava |   |
| 72      | 298    | 3   | 9 | 1 | 20 | 1897 | 1916 | UGGU              | UCCA              | ge     | 1 |
| trf_1_1 | Bra010 | 19. |   |   |    |      |      | GGGGAUUAUAGCUCAGU | GUUCUCACCAGCAGAGC | Cleava |   |
| 84      | 298    | 3   | 9 | 1 | 25 | 1891 | 1916 | UGGU-AGAGC        | UAUAUUCCA         | ge     | 1 |
| trf_1_1 | Bra010 | 19. |   |   |    |      |      | GGGGAUUAUAGCUCAGU | ACCAGCAGAGCUAUAU  | Cleava |   |
| 85      | 298    | 3   | 9 | 1 | 20 | 1897 | 1916 | UGGU              | UCCA              | ge     | 1 |
| trf_1_1 | Bra010 | 19. |   |   |    |      |      | GGGGAUUAUAGCUCAGU | ACCAGCAGAGCUAUAU  | Cleava |   |
| 86      | 298    | 3   | 9 | 1 | 20 | 1897 | 1916 | UGGU              | UCCA              | ge     | 1 |
| trf_1_1 | Bra010 | 19. |   |   |    |      |      | GGGGAUUAUAGCUCAGU | ACCAGCAGAGCUAUAU  | Cleava |   |
| 87      | 298    | 3   | 9 | 1 | 20 | 1897 | 1916 | UGGU              | UCCA              | ge     | 1 |
| trf_1_2 | Bra010 | 19. |   |   |    |      |      | GGGGAUUAUAGCUCAGU | ACCAGCAGAGCUAUAU  | Cleava |   |
| 34      | 298    | 3   | 9 | 1 | 20 | 1897 | 1916 | UGGU              | UCCA              | ge     | 1 |
| trf_1_2 | Bra010 | 19. |   |   |    |      |      | GGGGAUUAUAGCUCAGU | ACCAGCAGAGCUAUAU  | Cleava |   |
| 35      | 298    | 3   | 9 | 1 | 20 | 1897 | 1916 | UGGU              | UCCA              | ge     | 1 |
| trf_1_2 | Bra010 | 19. |   |   |    |      |      | GGGGAUUAUAGCUCAGU | UUCUCACCAGCAGAGCU | Cleava |   |
| 37      | 298    | 3   | 9 | 1 | 24 | 1892 | 1916 | UGGU-AGAG         | AUAUUCCA          | ge     | 1 |
| trf_1_2 | Bra010 | 19. |   |   |    |      |      | GGGGAUUAUAGCUCAGU | ACCAGCAGAGCUAUAU  | Cleava |   |
| 45      | 298    | 3   | 9 | 1 | 20 | 1897 | 1916 | UGGU              | UCCA              | ge     | 1 |
| trf_1_2 | Bra010 | 19. |   |   |    |      |      | GGGGAUUAUAGCUCAGU | ACCAGCAGAGCUAUAU  | Cleava |   |
| 46      | 298    | 3   | 9 | 1 | 20 | 1897 | 1916 | UGGU              | UCCA              | ge     | 1 |

|         |        |     |   |   |    |      |      |                   |                   |        |   |
|---------|--------|-----|---|---|----|------|------|-------------------|-------------------|--------|---|
| trf_1_2 | Bra010 | 19. |   |   |    |      |      | GGGGAUUAUAGCUCAGU | GUUCUCACCAGCAGAGC | Cleava |   |
| 48      | 298    | 3   | 9 | 1 | 25 | 1891 | 1916 | UGGU-AGAGC        | UAUAUUCCA         | ge     | 1 |
| trf_1_2 | Bra010 | 19. |   |   |    |      |      | GGGGAUUAUAGCUCAGU | ACCAGCAGAGCUAUAU  | Cleava |   |
| 65      | 298    | 3   | 9 | 1 | 20 | 1897 | 1916 | UGGU              | UCCA              | ge     | 1 |
| trf_1_2 | Bra010 | 19. |   |   |    |      |      | GGGGAUUAUAGCUCAGU | GUUCUCACCAGCAGAGC | Cleava |   |
| 67      | 298    | 3   | 9 | 1 | 25 | 1891 | 1916 | UGGU-AGAGC        | UAUAUUCCA         | ge     | 1 |
| trf_1_2 | Bra010 | 19. |   |   |    |      |      | GGGGAUUAUAGCUCAGU | ACCAGCAGAGCUAUAU  | Cleava |   |
| 68      | 298    | 3   | 9 | 1 | 20 | 1897 | 1916 | UGGU              | UCCA              | ge     | 1 |
| trf_1_2 | Bra010 | 19. |   |   |    |      |      | GGGGAUUAUAGCUCAGU | ACCAGCAGAGCUAUAU  | Cleava |   |
| 69      | 298    | 3   | 9 | 1 | 20 | 1897 | 1916 | UGGU              | UCCA              | ge     | 1 |
| trf_1_2 | Bra010 | 19. |   |   |    |      |      | GGGGAUUAUAGCUCAGU | UUCUCACCAGCAGAGCU | Cleava |   |
| 70      | 298    | 3   | 9 | 1 | 24 | 1892 | 1916 | UGGU-AGAG         | AUAUUCCA          | ge     | 1 |
| trf_1_2 | Bra010 | 19. |   |   |    |      |      | GGGGAUUAUAGCUCAGU | ACCAGCAGAGCUAUAU  | Cleava |   |
| 83      | 298    | 3   | 9 | 1 | 20 | 1897 | 1916 | UGGU              | UCCA              | ge     | 1 |
| trf_1_2 | Bra010 | 19. |   |   |    |      |      | GGGGAUUAUAGCUCAGU | GUUCUCACCAGCAGAGC | Cleava |   |
| 84      | 298    | 3   | 9 | 1 | 25 | 1891 | 1916 | UGGU-AGAGC        | UAUAUUCCA         | ge     | 1 |
| trf_1_2 | Bra010 | 19. |   |   |    |      |      | GGGGAUUAUAGCUCAGU | ACCAGCAGAGCUAUAU  | Cleava |   |
| 85      | 298    | 3   | 9 | 1 | 20 | 1897 | 1916 | UGGU              | UCCA              | ge     | 1 |
| trf_1_2 | Bra010 | 19. |   |   |    |      |      | GGGGAUUAUAGCUCAGU | ACCAGCAGAGCUAUAU  | Cleava |   |
| 94      | 298    | 3   | 9 | 1 | 20 | 1897 | 1916 | UGGU              | UCCA              | ge     | 1 |
| trf_1_2 | Bra010 | 19. |   |   |    |      |      | GGGGAUUAUAGCUCAGU | GUUCUCACCAGCAGAGC | Cleava |   |
| 95      | 298    | 3   | 9 | 1 | 25 | 1891 | 1916 | UGGU-AGAGC        | UAUAUUCCA         | ge     | 1 |
| trf_1_2 | Bra010 | 19. |   |   |    |      |      | GGGGAUUAUAGCUCAGU | ACCAGCAGAGCUAUAU  | Cleava |   |
| 96      | 298    | 3   | 9 | 1 | 20 | 1897 | 1916 | UGGU              | UCCA              | ge     | 1 |
| trf_1_2 | Bra010 | 19. |   |   |    |      |      | GGGGAUUAUAGCUCAGU | UUCUCACCAGCAGAGCU | Cleava |   |
| 98      | 298    | 3   | 9 | 1 | 24 | 1892 | 1916 | UGGU-AGAG         | AUAUUCCA          | ge     | 1 |
| trf_1_3 | Bra010 | 19. |   |   |    |      |      | GGGGAUUAUAGCUCAGU | ACCAGCAGAGCUAUAU  | Cleava |   |
| 01      | 298    | 3   | 9 | 1 | 20 | 1897 | 1916 | UGGU              | UCCA              | ge     | 1 |
| trf_1_3 | Bra010 | 19. |   |   |    |      |      | GGGGAUUAUAGCUCAGU | GUUCUCACCAGCAGAGC | Cleava |   |
| 03      | 298    | 3   | 9 | 1 | 25 | 1891 | 1916 | UGGU-AGAGC        | UAUAUUCCA         | ge     | 1 |
| trf_1_3 | Bra010 | 19. |   |   |    |      |      | GGGGAUUAUAGCUCAGU | ACCAGCAGAGCUAUAU  | Cleava |   |
| 04      | 298    | 3   | 9 | 1 | 20 | 1897 | 1916 | UGGU              | UCCA              | ge     | 1 |
| trf_1_3 | Bra010 | 19. |   |   |    |      |      | GGGGAUUAUAGCUCAGU | ACCAGCAGAGCUAUAU  | Cleava |   |
| 05      | 298    | 3   | 9 | 1 | 20 | 1897 | 1916 | UGGU              | UCCA              | ge     | 1 |

|         |        |     |   |   |    |      |      |                   |                   |        |   |
|---------|--------|-----|---|---|----|------|------|-------------------|-------------------|--------|---|
| trf_1_3 | Bra010 | 19. |   |   |    |      |      | GGGGAUUAUAGCUCAGU | ACCAGCAGAGCUAUUAU | Cleava |   |
| 08      | 298    | 3   | 9 | 1 | 20 | 1897 | 1916 | UGGU              | UCCA              | ge     | 1 |
| trf_1_3 | Bra010 | 19. |   |   |    |      |      | GGGGAUUAUAGCUCAGU | GUUCUCACCAGCAGAGC | Cleava |   |
| 09      | 298    | 3   | 9 | 1 | 25 | 1891 | 1916 | UGGU-AGAGC        | UAUAUUCCA         | ge     | 1 |
| trf_1_3 | Bra010 | 19. |   |   |    |      |      | GGGGAUUAUAGCUCAGU | ACCAGCAGAGCUAUUAU | Cleava |   |
| 10      | 298    | 3   | 9 | 1 | 20 | 1897 | 1916 | UGGU              | UCCA              | ge     | 1 |
| trf_1_3 | Bra010 | 19. |   |   |    |      |      | GGGGAUUAUAGCUCAGU | UUCUCACCAGCAGAGCU | Cleava |   |
| 15      | 298    | 3   | 9 | 1 | 24 | 1892 | 1916 | UGGU-AGAG         | AUAUUCCA          | ge     | 1 |
| trf_1_3 | Bra010 | 19. |   |   |    |      |      | GGGGAUUAUAGCUCAGU | GUUCUCACCAGCAGAGC | Cleava |   |
| 16      | 298    | 3   | 9 | 1 | 25 | 1891 | 1916 | UGGU-AGAGC        | UAUAUUCCA         | ge     | 1 |
| trf_1_3 | Bra010 | 19. |   |   |    |      |      | GGGGAUUAUAGCUCAGU | ACCAGCAGAGCUAUUAU | Cleava |   |
| 17      | 298    | 3   | 9 | 1 | 20 | 1897 | 1916 | UGGU              | UCCA              | ge     | 1 |
| trf_1_3 | Bra010 | 19. |   |   |    |      |      | GGGGAUUAUAGCUCAGU | ACCAGCAGAGCUAUUAU | Cleava |   |
| 18      | 298    | 3   | 9 | 1 | 20 | 1897 | 1916 | UGGU              | UCCA              | ge     | 1 |
| trf_1_3 | Bra010 | 19. |   |   |    |      |      | GGGGAUUAUAGCUCAGU | GUUCUCACCAGCAGAGC | Cleava |   |
| 21      | 298    | 3   | 9 | 1 | 25 | 1891 | 1916 | UGGU-AGAGC        | UAUAUUCCA         | ge     | 1 |
| trf_1_3 | Bra010 | 19. |   |   |    |      |      | GGGGAUUAUAGCUCAGU | ACCAGCAGAGCUAUUAU | Cleava |   |
| 24      | 298    | 3   | 9 | 1 | 20 | 1897 | 1916 | UGGU              | UCCA              | ge     | 1 |
| trf_1_3 | Bra010 | 19. |   |   |    |      |      | GGGGAUUAUAGCUCAGU | ACCAGCAGAGCUAUUAU | Cleava |   |
| 25      | 298    | 3   | 9 | 1 | 20 | 1897 | 1916 | UGGU              | UCCA              | ge     | 1 |
| trf_1_3 | Bra010 | 19. |   |   |    |      |      | GGGGAUUAUAGCUCAGU | ACCAGCAGAGCUAUUAU | Cleava |   |
| 33      | 298    | 3   | 9 | 1 | 20 | 1897 | 1916 | UGGU              | UCCA              | ge     | 1 |
| trf_1_3 | Bra010 | 19. |   |   |    |      |      | GGGGAUUAUAGCUCAGU | ACCAGCAGAGCUAUUAU | Cleava |   |
| 34      | 298    | 3   | 9 | 1 | 20 | 1897 | 1916 | UGGU              | UCCA              | ge     | 1 |
| trf_1_3 | Bra010 | 19. |   |   |    |      |      | GGGGAUUAUAGCUCAGU | GUUCUCACCAGCAGAGC | Cleava |   |
| 35      | 298    | 3   | 9 | 1 | 25 | 1891 | 1916 | UGGU-AGAGC        | UAUAUUCCA         | ge     | 1 |
| trf_1_3 | Bra010 | 19. |   |   |    |      |      | GGGGAUUAUAGCUCAGU | ACCAGCAGAGCUAUUAU | Cleava |   |
| 39      | 298    | 3   | 9 | 1 | 20 | 1897 | 1916 | UGGU              | UCCA              | ge     | 1 |
| trf_1_3 | Bra010 | 19. |   |   |    |      |      | GGGGAUUAUAGCUCAGU | GUUCUCACCAGCAGAGC | Cleava |   |
| 40      | 298    | 3   | 9 | 1 | 25 | 1891 | 1916 | UGGU-AGAGC        | UAUAUUCCA         | ge     | 1 |
| trf_1_3 | Bra010 | 19. |   |   |    |      |      | GGGGAUUAUAGCUCAGU | ACCAGCAGAGCUAUUAU | Cleava |   |
| 42      | 298    | 3   | 9 | 1 | 20 | 1897 | 1916 | UGGU              | UCCA              | ge     | 1 |
| trf_1_3 | Bra010 | 19. |   |   |    |      |      | GGGGAUUAUAGCUCAGU | ACCAGCAGAGCUAUUAU | Cleava |   |
| 43      | 298    | 3   | 9 | 1 | 20 | 1897 | 1916 | UGGU              | UCCA              | ge     | 1 |



|         |        |     |   |   |    |      |      |                   |                   |        |   |
|---------|--------|-----|---|---|----|------|------|-------------------|-------------------|--------|---|
| trf_1_3 | Bra010 | 19. |   |   |    |      |      | GGGGAUUAUAGCUCAGU | ACCAGCAGAGCUAUUAU | Cleava |   |
| 44      | 298    | 3   | 9 | 1 | 20 | 1897 | 1916 | UGGU              | UCCA              | ge     | 1 |
| trf_1_3 | Bra010 | 19. |   |   |    |      |      | GGGGAUUAUAGCUCAGU | ACCAGCAGAGCUAUUAU | Cleava |   |
| 52      | 298    | 3   | 9 | 1 | 20 | 1897 | 1916 | UGGU              | UCCA              | ge     | 1 |
| trf_1_3 | Bra010 | 19. |   |   |    |      |      | GGGGAUUAUAGCUCAGU | ACCAGCAGAGCUAUUAU | Cleava |   |
| 54      | 298    | 3   | 9 | 1 | 20 | 1897 | 1916 | UGGU              | UCCA              | ge     | 1 |
| trf_1_3 | Bra010 | 19. |   |   |    |      |      | GGGGAUUAUAGCUCAGU | ACCAGCAGAGCUAUUAU | Cleava |   |
| 55      | 298    | 3   | 9 | 1 | 20 | 1897 | 1916 | UGGU              | UCCA              | ge     | 1 |
| trf_1_3 | Bra010 | 19. |   |   |    |      |      | GGGGAUUAUAGCUCAGU | ACCAGCAGAGCUAUUAU | Cleava |   |
| 56      | 298    | 3   | 9 | 1 | 20 | 1897 | 1916 | UGGU              | UCCA              | ge     | 1 |
| trf_1_3 | Bra010 | 19. |   |   |    |      |      | GGGGAUUAUAGCUCAGU | GUUCUCACCAGCAGAGC | Cleava |   |
| 57      | 298    | 3   | 9 | 1 | 25 | 1891 | 1916 | UGGU-AGAGC        | UAUAUUCCA         | ge     | 1 |
| trf_1_3 | Bra010 | 19. |   |   |    |      |      | GGGGAUUAUAGCUCAGU | UUCUCACCAGCAGAGCU | Cleava |   |
| 58      | 298    | 3   | 9 | 1 | 24 | 1892 | 1916 | UGGU-AGAG         | AUAUUCCA          | ge     | 1 |
| trf_1_3 | Bra010 | 19. |   |   |    |      |      | GGGGAUUAUAGCUCAGU | ACCAGCAGAGCUAUUAU | Cleava |   |
| 61      | 298    | 3   | 9 | 1 | 20 | 1897 | 1916 | UGGU              | UCCA              | ge     | 1 |
| trf_1_3 | Bra010 | 19. |   |   |    |      |      | GGGGAUUAUAGCUCAGU | ACCAGCAGAGCUAUUAU | Cleava |   |
| 63      | 298    | 3   | 9 | 1 | 20 | 1897 | 1916 | UGGU              | UCCA              | ge     | 1 |
| trf_1_3 | Bra010 | 19. |   |   |    |      |      | GGGGAUUAUAGCUCAGU | GUUCUCACCAGCAGAGC | Cleava |   |
| 64      | 298    | 3   | 9 | 1 | 25 | 1891 | 1916 | UGGU-AGAGC        | UAUAUUCCA         | ge     | 1 |
| trf_1_3 | Bra010 | 19. |   |   |    |      |      | GGGGAUUAUAGCUCAGU | ACCAGCAGAGCUAUUAU | Cleava |   |
| 65      | 298    | 3   | 9 | 1 | 20 | 1897 | 1916 | UGGU              | UCCA              | ge     | 1 |
| trf_1_3 | Bra010 | 19. |   |   |    |      |      | GGGGAUUAUAGCUCAGU | ACCAGCAGAGCUAUUAU | Cleava |   |
| 76      | 298    | 3   | 9 | 1 | 20 | 1897 | 1916 | UGGU              | UCCA              | ge     | 1 |
| trf_1_3 | Bra010 | 19. |   |   |    |      |      | GGGGAUUAUAGCUCAGU | ACCAGCAGAGCUAUUAU | Cleava |   |
| 77      | 298    | 3   | 9 | 1 | 20 | 1897 | 1916 | UGGU              | UCCA              | ge     | 1 |
| trf_1_3 | Bra010 | 19. |   |   |    |      |      | GGGGAUUAUAGCUCAGU | GUUCUCACCAGCAGAGC | Cleava |   |
| 78      | 298    | 3   | 9 | 1 | 25 | 1891 | 1916 | UGGU-AGAGC        | UAUAUUCCA         | ge     | 1 |
| trf_1_3 | Bra010 | 19. |   |   |    |      |      | GGGGAUUAUAGCUCAGU | ACCAGCAGAGCUAUUAU | Cleava |   |
| 80      | 298    | 3   | 9 | 1 | 20 | 1897 | 1916 | UGGU              | UCCA              | ge     | 1 |
| trf_1_3 | Bra010 | 19. |   |   |    |      |      | GGGGAUUAUAGCUCAGU | ACCAGCAGAGCUAUUAU | Cleava |   |
| 84      | 298    | 3   | 9 | 1 | 20 | 1897 | 1916 | UGGU              | UCCA              | ge     | 1 |
| trf_1_3 | Bra010 | 19. |   |   |    |      |      | GGGGAUUAUAGCUCAGU | ACCAGCAGAGCUAUUAU | Cleava |   |
| 85      | 298    | 3   | 9 | 1 | 20 | 1897 | 1916 | UGGU              | UCCA              | ge     | 1 |

|         |        |     |   |   |    |      |      |                   |                   |        |   |
|---------|--------|-----|---|---|----|------|------|-------------------|-------------------|--------|---|
| trf_1_3 | Bra010 | 19. |   |   |    |      |      | GGGGAUUAUAGCUCAGU | GUUCUCACCAGCAGAGC | Cleava |   |
| 86      | 298    | 3   | 9 | 1 | 25 | 1891 | 1916 | UGGU-AGAGC        | UAUAUUCCA         | ge     | 1 |
| trf_1_3 | Bra010 | 19. |   |   |    |      |      | GGGGAUUAUAGCUCAGU | ACCAGCAGAGCUAUAU  | Cleava |   |
| 87      | 298    | 3   | 9 | 1 | 20 | 1897 | 1916 | UGGU              | UCCA              | ge     | 1 |
| trf_1_3 | Bra010 | 19. |   |   |    |      |      | GGGGAUUAUAGCUCAGU | ACCAGCAGAGCUAUAU  | Cleava |   |
| 94      | 298    | 3   | 9 | 1 | 20 | 1897 | 1916 | UGGU              | UCCA              | ge     | 1 |
| trf_1_3 | Bra010 | 19. |   |   |    |      |      | GGGGAUUAUAGCUCAGU | GUUCUCACCAGCAGAGC | Cleava |   |
| 95      | 298    | 3   | 9 | 1 | 25 | 1891 | 1916 | UGGU-AGAGC        | UAUAUUCCA         | ge     | 1 |
| trf_1_3 | Bra010 | 19. |   |   |    |      |      | GGGGAUUAUAGCUCAGU | ACCAGCAGAGCUAUAU  | Cleava |   |
| 96      | 298    | 3   | 9 | 1 | 20 | 1897 | 1916 | UGGU              | UCCA              | ge     | 1 |
| trf_1_3 | Bra010 | 19. |   |   |    |      |      | GGGGAUUAUAGCUCAGU | ACCAGCAGAGCUAUAU  | Cleava |   |
| 97      | 298    | 3   | 9 | 1 | 20 | 1897 | 1916 | UGGU              | UCCA              | ge     | 1 |
| trf_1_4 | Bra010 | 19. |   |   |    |      |      | GGGGAUUAUAGCUCAGU | GUUCUCACCAGCAGAGC | Cleava |   |
| 01      | 298    | 3   | 9 | 1 | 25 | 1891 | 1916 | UGGU-AGAGC        | UAUAUUCCA         | ge     | 1 |
| trf_1_4 | Bra010 | 19. |   |   |    |      |      | GGGGAUUAUAGCUCAGU | ACCAGCAGAGCUAUAU  | Cleava |   |
| 02      | 298    | 3   | 9 | 1 | 20 | 1897 | 1916 | UGGU              | UCCA              | ge     | 1 |
| trf_1_4 | Bra010 | 19. |   |   |    |      |      | GGGGAUUAUAGCUCAGU | ACCAGCAGAGCUAUAU  | Cleava |   |
| 03      | 298    | 3   | 9 | 1 | 20 | 1897 | 1916 | UGGU              | UCCA              | ge     | 1 |
| trf_1_4 | Bra010 | 19. |   |   |    |      |      | GGGGAUUAUAGCUCAGU | UUCUCACCAGCAGAGCU | Cleava |   |
| 05      | 298    | 3   | 9 | 1 | 24 | 1892 | 1916 | UGGU-AGAG         | AUAUUCCA          | ge     | 1 |
| trf_1_4 | Bra010 | 19. |   |   |    |      |      | GGGGAUUAUAGCUCAGU | ACCAGCAGAGCUAUAU  | Cleava |   |
| 06      | 298    | 3   | 9 | 1 | 20 | 1897 | 1916 | UGGU              | UCCA              | ge     | 1 |
| trf_1_4 | Bra010 | 19. |   |   |    |      |      | GGGGAUUAUAGCUCAGU | ACCAGCAGAGCUAUAU  | Cleava |   |
| 07      | 298    | 3   | 9 | 1 | 20 | 1897 | 1916 | UGGU              | UCCA              | ge     | 1 |
| trf_1_4 | Bra010 | 19. |   |   |    |      |      | GGGGAUUAUAGCUCAGU | GUUCUCACCAGCAGAGC | Cleava |   |
| 09      | 298    | 3   | 9 | 1 | 25 | 1891 | 1916 | UGGU-AGAGC        | UAUAUUCCA         | ge     | 1 |
| trf_1_4 | Bra010 | 19. |   |   |    |      |      | GGGGAUUAUAGCUCAGU | ACCAGCAGAGCUAUAU  | Cleava |   |
| 11      | 298    | 3   | 9 | 1 | 20 | 1897 | 1916 | UGGU              | UCCA              | ge     | 1 |
| trf_1_4 | Bra010 | 19. |   |   |    |      |      | GGGGAUUAUAGCUCAGU | ACCAGCAGAGCUAUAU  | Cleava |   |
| 83      | 298    | 3   | 9 | 1 | 20 | 1897 | 1916 | UGGU              | UCCA              | ge     | 1 |
| trf_1_4 | Bra010 | 19. |   |   |    |      |      | GGGGAUUAUAGCUCAGU | ACCAGCAGAGCUAUAU  | Cleava |   |
| 84      | 298    | 3   | 9 | 1 | 20 | 1897 | 1916 | UGGU              | UCCA              | ge     | 1 |
| trf_1_4 | Bra010 | 19. |   |   |    |      |      | GGGGAUUAUAGCUCAGU | ACCAGCAGAGCUAUAU  | Cleava |   |
| 85      | 298    | 3   | 9 | 1 | 20 | 1897 | 1916 | UGGU              | UCCA              | ge     | 1 |

|         |        |     |   |   |    |      |      |                   |                   |        |   |
|---------|--------|-----|---|---|----|------|------|-------------------|-------------------|--------|---|
| trf_1_4 | Bra010 | 19. |   |   |    |      |      | GGGGAUUAUAGCUCAGU | GUUCUCACCAGCAGAGC | Cleava |   |
| 87      | 298    | 3   | 9 | 1 | 25 | 1891 | 1916 | UGGU-AGAGC        | UAUAUUCCA         | ge     | 1 |
| trf_1_4 | Bra010 | 19. |   |   |    |      |      | GGGGAUUAUAGCUCAGU | ACCAGCAGAGCUAUAU  | Cleava |   |
| 88      | 298    | 3   | 9 | 1 | 20 | 1897 | 1916 | UGGU              | UCCA              | ge     | 1 |
| trf_1_4 | Bra010 | 19. |   |   |    |      |      | GGGGAUUAUAGCUCAGU | ACCAGCAGAGCUAUAU  | Cleava |   |
| 90      | 298    | 3   | 9 | 1 | 20 | 1897 | 1916 | UGGU              | UCCA              | ge     | 1 |
| trf_1_4 | Bra010 | 19. |   |   |    |      |      | GGGGAUUAUAGCUCAGU | GUUCUCACCAGCAGAGC | Cleava |   |
| 91      | 298    | 3   | 9 | 1 | 25 | 1891 | 1916 | UGGU-AGAGC        | UAUAUUCCA         | ge     | 1 |
| trf_1_4 | Bra010 | 19. |   |   |    |      |      | GGGGAUUAUAGCUCAGU | ACCAGCAGAGCUAUAU  | Cleava |   |
| 92      | 298    | 3   | 9 | 1 | 20 | 1897 | 1916 | UGGU              | UCCA              | ge     | 1 |
| trf_1_4 | Bra010 | 19. |   |   |    |      |      | GGGGAUUAUAGCUCAGU | ACCAGCAGAGCUAUAU  | Cleava |   |
| 93      | 298    | 3   | 9 | 1 | 20 | 1897 | 1916 | UGGU              | UCCA              | ge     | 1 |
| trf_1_4 | Bra010 | 19. |   |   |    |      |      | GGGGAUUAUAGCUCAGU | UUCUCACCAGCAGAGCU | Cleava |   |
| 95      | 298    | 3   | 9 | 1 | 24 | 1892 | 1916 | UGGU-AGAG         | AUAUUCCA          | ge     | 1 |
| trf_1_5 | Bra010 | 19. |   |   |    |      |      | GGGGAUUAUAGCUCAGU | ACCAGCAGAGCUAUAU  | Cleava |   |
| 00      | 298    | 3   | 9 | 1 | 20 | 1897 | 1916 | UGGU              | UCCA              | ge     | 1 |
| trf_1_5 | Bra010 | 19. |   |   |    |      |      | GGGGAUUAUAGCUCAGU | UUCUCACCAGCAGAGCU | Cleava |   |
| 01      | 298    | 3   | 9 | 1 | 24 | 1892 | 1916 | UGGU-AGAG         | AUAUUCCA          | ge     | 1 |
| trf_1_5 | Bra010 | 19. |   |   |    |      |      | GGGGAUUAUAGCUCAGU | ACCAGCAGAGCUAUAU  | Cleava |   |
| 02      | 298    | 3   | 9 | 1 | 20 | 1897 | 1916 | UGGU              | UCCA              | ge     | 1 |
| trf_1_5 | Bra010 | 19. |   |   |    |      |      | GGGGAUUAUAGCUCAGU | GUUCUCACCAGCAGAGC | Cleava |   |
| 03      | 298    | 3   | 9 | 1 | 25 | 1891 | 1916 | UGGU-AGAGC        | UAUAUUCCA         | ge     | 1 |
| trf_1_5 | Bra010 | 19. |   |   |    |      |      | GGGGAUUAUAGCUCAGU | ACCAGCAGAGCUAUAU  | Cleava |   |
| 04      | 298    | 3   | 9 | 1 | 20 | 1897 | 1916 | UGGU              | UCCA              | ge     | 1 |
| trf_1_3 | Bra010 | 19. |   |   |    |      |      | GGGGAUUAUAGCUCAGU | GUUCUCACCAGCAGAGC | Cleava |   |
| 2       | 299    | 3   | 9 | 1 | 25 | 1867 | 1892 | UGGU-AGAGC        | UAUAUUCCA         | ge     | 1 |
| trf_1_3 | Bra010 | 19. |   |   |    |      |      | GGGGAUUAUAGCUCAGU | ACCAGCAGAGCUAUAU  | Cleava |   |
| 3       | 299    | 3   | 9 | 1 | 20 | 1873 | 1892 | UGGU              | UCCA              | ge     | 1 |
| trf_1_3 | Bra010 | 19. |   |   |    |      |      | GGGGAUUAUAGCUCAGU | UUCUCACCAGCAGAGCU | Cleava |   |
| 4       | 299    | 3   | 9 | 1 | 24 | 1868 | 1892 | UGGU-AGAG         | AUAUUCCA          | ge     | 1 |
| trf_1_3 | Bra010 | 19. |   |   |    |      |      | GGGGAUUAUAGCUCAGU | ACCAGCAGAGCUAUAU  | Cleava |   |
| 6       | 299    | 3   | 9 | 1 | 20 | 1873 | 1892 | UGGU              | UCCA              | ge     | 1 |
| trf_1_5 | Bra010 | 19. |   |   |    |      |      | GGGGAUUAUAGCUCAGU | ACCAGCAGAGCUAUAU  | Cleava |   |
| 9       | 299    | 3   | 9 | 1 | 20 | 1873 | 1892 | UGGU              | UCCA              | ge     | 1 |

|         |        |     |   |   |    |      |      |                   |                   |        |   |
|---------|--------|-----|---|---|----|------|------|-------------------|-------------------|--------|---|
| trf_1_6 | Bra010 | 19. |   |   |    |      |      | GGGGAUUAUAGCUCAGU | GUUCUCACCAGCAGAGC | Cleava |   |
| 1       | 299    | 3   | 9 | 1 | 25 | 1867 | 1892 | UGGU-AGAGC        | UAUAUUCCA         | ge     | 1 |
| trf_1_6 | Bra010 | 19. |   |   |    |      |      | GGGGAUUAUAGCUCAGU | ACCAGCAGAGCUAUAU  | Cleava |   |
| 3       | 299    | 3   | 9 | 1 | 20 | 1873 | 1892 | UGGU              | UCCA              | ge     | 1 |
| trf_1_6 | Bra010 | 19. |   |   |    |      |      | GGGGAUUAUAGCUCAGU | ACCAGCAGAGCUAUAU  | Cleava |   |
| 4       | 299    | 3   | 9 | 1 | 20 | 1873 | 1892 | UGGU              | UCCA              | ge     | 1 |
| trf_1_8 | Bra010 | 19. |   |   |    |      |      | GGGGAUUAUAGCUCAGU | ACCAGCAGAGCUAUAU  | Cleava |   |
| 9       | 299    | 3   | 9 | 1 | 20 | 1873 | 1892 | UGGU              | UCCA              | ge     | 1 |
| trf_1_9 | Bra010 | 19. |   |   |    |      |      | GGGGAUUAUAGCUCAGU | GUUCUCACCAGCAGAGC | Cleava |   |
| 1       | 299    | 3   | 9 | 1 | 25 | 1867 | 1892 | UGGU-AGAGC        | UAUAUUCCA         | ge     | 1 |
| trf_1_9 | Bra010 | 19. |   |   |    |      |      | GGGGAUUAUAGCUCAGU | ACCAGCAGAGCUAUAU  | Cleava |   |
| 2       | 299    | 3   | 9 | 1 | 20 | 1873 | 1892 | UGGU              | UCCA              | ge     | 1 |
| trf_1_9 | Bra010 | 19. |   |   |    |      |      | GGGGAUUAUAGCUCAGU | ACCAGCAGAGCUAUAU  | Cleava |   |
| 3       | 299    | 3   | 9 | 1 | 20 | 1873 | 1892 | UGGU              | UCCA              | ge     | 1 |
| trf_1_1 | Bra010 | 19. |   |   |    |      |      | GGGGAUUAUAGCUCAGU | ACCAGCAGAGCUAUAU  | Cleava |   |
| 34      | 299    | 3   | 9 | 1 | 20 | 1873 | 1892 | UGGU              | UCCA              | ge     | 1 |
| trf_1_1 | Bra010 | 19. |   |   |    |      |      | GGGGAUUAUAGCUCAGU | ACCAGCAGAGCUAUAU  | Cleava |   |
| 35      | 299    | 3   | 9 | 1 | 20 | 1873 | 1892 | UGGU              | UCCA              | ge     | 1 |
| trf_1_1 | Bra010 | 19. |   |   |    |      |      | GGGGAUUAUAGCUCAGU | GUUCUCACCAGCAGAGC | Cleava |   |
| 36      | 299    | 3   | 9 | 1 | 25 | 1867 | 1892 | UGGU-AGAGC        | UAUAUUCCA         | ge     | 1 |
| trf_1_1 | Bra010 | 19. |   |   |    |      |      | GGGGAUUAUAGCUCAGU | ACCAGCAGAGCUAUAU  | Cleava |   |
| 39      | 299    | 3   | 9 | 1 | 20 | 1873 | 1892 | UGGU              | UCCA              | ge     | 1 |
| trf_1_1 | Bra010 | 19. |   |   |    |      |      | GGGGAUUAUAGCUCAGU | ACCAGCAGAGCUAUAU  | Cleava |   |
| 51      | 299    | 3   | 9 | 1 | 20 | 1873 | 1892 | UGGU              | UCCA              | ge     | 1 |
| trf_1_1 | Bra010 | 19. |   |   |    |      |      | GGGGAUUAUAGCUCAGU | ACCAGCAGAGCUAUAU  | Cleava |   |
| 52      | 299    | 3   | 9 | 1 | 20 | 1873 | 1892 | UGGU              | UCCA              | ge     | 1 |
| trf_1_1 | Bra010 | 19. |   |   |    |      |      | GGGGAUUAUAGCUCAGU | ACCAGCAGAGCUAUAU  | Cleava |   |
| 55      | 299    | 3   | 9 | 1 | 20 | 1873 | 1892 | UGGU              | UCCA              | ge     | 1 |
| trf_1_1 | Bra010 | 19. |   |   |    |      |      | GGGGAUUAUAGCUCAGU | GUUCUCACCAGCAGAGC | Cleava |   |
| 56      | 299    | 3   | 9 | 1 | 25 | 1867 | 1892 | UGGU-AGAGC        | UAUAUUCCA         | ge     | 1 |
| trf_1_1 | Bra010 | 19. |   |   |    |      |      | GGGGAUUAUAGCUCAGU | GUUCUCACCAGCAGAGC | Cleava |   |
| 61      | 299    | 3   | 9 | 1 | 25 | 1867 | 1892 | UGGU-AGAGC        | UAUAUUCCA         | ge     | 1 |
| trf_1_1 | Bra010 | 19. |   |   |    |      |      | GGGGAUUAUAGCUCAGU | UUCUCACCAGCAGAGCU | Cleava |   |
| 63      | 299    | 3   | 9 | 1 | 24 | 1868 | 1892 | UGGU-AGAG         | AUAUUCCA          | ge     | 1 |

|         |        |     |   |   |    |      |      |                   |                   |        |   |
|---------|--------|-----|---|---|----|------|------|-------------------|-------------------|--------|---|
| trf_1_1 | Bra010 | 19. |   |   |    |      |      | GGGGAUUAUAGCUCAGU | ACCAGCAGAGCUAUAU  | Cleava |   |
| 64      | 299    | 3   | 9 | 1 | 20 | 1873 | 1892 | UGGU              | UCCA              | ge     | 1 |
| trf_1_1 | Bra010 | 19. |   |   |    |      |      | GGGGAUUAUAGCUCAGU | ACCAGCAGAGCUAUAU  | Cleava |   |
| 65      | 299    | 3   | 9 | 1 | 20 | 1873 | 1892 | UGGU              | UCCA              | ge     | 1 |
| trf_1_1 | Bra010 | 19. |   |   |    |      |      | GGGGAUUAUAGCUCAGU | ACCAGCAGAGCUAUAU  | Cleava |   |
| 66      | 299    | 3   | 9 | 1 | 20 | 1873 | 1892 | UGGU              | UCCA              | ge     | 1 |
| trf_1_1 | Bra010 | 19. |   |   |    |      |      | GGGGAUUAUAGCUCAGU | GUUCUCACCAGCAGAGC | Cleava |   |
| 68      | 299    | 3   | 9 | 1 | 25 | 1867 | 1892 | UGGU-AGAGC        | UAUUAUCCA         | ge     | 1 |
| trf_1_1 | Bra010 | 19. |   |   |    |      |      | GGGGAUUAUAGCUCAGU | ACCAGCAGAGCUAUAU  | Cleava |   |
| 70      | 299    | 3   | 9 | 1 | 20 | 1873 | 1892 | UGGU              | UCCA              | ge     | 1 |
| trf_1_1 | Bra010 | 19. |   |   |    |      |      | GGGGAUUAUAGCUCAGU | ACCAGCAGAGCUAUAU  | Cleava |   |
| 71      | 299    | 3   | 9 | 1 | 20 | 1873 | 1892 | UGGU              | UCCA              | ge     | 1 |
| trf_1_1 | Bra010 | 19. |   |   |    |      |      | GGGGAUUAUAGCUCAGU | ACCAGCAGAGCUAUAU  | Cleava |   |
| 72      | 299    | 3   | 9 | 1 | 20 | 1873 | 1892 | UGGU              | UCCA              | ge     | 1 |
| trf_1_1 | Bra010 | 19. |   |   |    |      |      | GGGGAUUAUAGCUCAGU | GUUCUCACCAGCAGAGC | Cleava |   |
| 84      | 299    | 3   | 9 | 1 | 25 | 1867 | 1892 | UGGU-AGAGC        | UAUUAUCCA         | ge     | 1 |
| trf_1_1 | Bra010 | 19. |   |   |    |      |      | GGGGAUUAUAGCUCAGU | ACCAGCAGAGCUAUAU  | Cleava |   |
| 85      | 299    | 3   | 9 | 1 | 20 | 1873 | 1892 | UGGU              | UCCA              | ge     | 1 |
| trf_1_1 | Bra010 | 19. |   |   |    |      |      | GGGGAUUAUAGCUCAGU | ACCAGCAGAGCUAUAU  | Cleava |   |
| 86      | 299    | 3   | 9 | 1 | 20 | 1873 | 1892 | UGGU              | UCCA              | ge     | 1 |
| trf_1_1 | Bra010 | 19. |   |   |    |      |      | GGGGAUUAUAGCUCAGU | ACCAGCAGAGCUAUAU  | Cleava |   |
| 87      | 299    | 3   | 9 | 1 | 20 | 1873 | 1892 | UGGU              | UCCA              | ge     | 1 |
| trf_1_2 | Bra010 | 19. |   |   |    |      |      | GGGGAUUAUAGCUCAGU | ACCAGCAGAGCUAUAU  | Cleava |   |
| 34      | 299    | 3   | 9 | 1 | 20 | 1873 | 1892 | UGGU              | UCCA              | ge     | 1 |
| trf_1_2 | Bra010 | 19. |   |   |    |      |      | GGGGAUUAUAGCUCAGU | ACCAGCAGAGCUAUAU  | Cleava |   |
| 35      | 299    | 3   | 9 | 1 | 20 | 1873 | 1892 | UGGU              | UCCA              | ge     | 1 |
| trf_1_2 | Bra010 | 19. |   |   |    |      |      | GGGGAUUAUAGCUCAGU | UUCUCACCAGCAGAGCU | Cleava |   |
| 37      | 299    | 3   | 9 | 1 | 24 | 1868 | 1892 | UGGU-AGAG         | AUAUCCA           | ge     | 1 |
| trf_1_2 | Bra010 | 19. |   |   |    |      |      | GGGGAUUAUAGCUCAGU | ACCAGCAGAGCUAUAU  | Cleava |   |
| 45      | 299    | 3   | 9 | 1 | 20 | 1873 | 1892 | UGGU              | UCCA              | ge     | 1 |
| trf_1_2 | Bra010 | 19. |   |   |    |      |      | GGGGAUUAUAGCUCAGU | ACCAGCAGAGCUAUAU  | Cleava |   |
| 46      | 299    | 3   | 9 | 1 | 20 | 1873 | 1892 | UGGU              | UCCA              | ge     | 1 |
| trf_1_2 | Bra010 | 19. |   |   |    |      |      | GGGGAUUAUAGCUCAGU | GUUCUCACCAGCAGAGC | Cleava |   |
| 48      | 299    | 3   | 9 | 1 | 25 | 1867 | 1892 | UGGU-AGAGC        | UAUUAUCCA         | ge     | 1 |

|         |        |     |   |   |    |      |      |                   |                   |        |   |
|---------|--------|-----|---|---|----|------|------|-------------------|-------------------|--------|---|
| trf_1_2 | Bra010 | 19. |   |   |    |      |      | GGGGAUUAUAGCUCAGU | ACCAGCAGAGCUAUAU  | Cleava |   |
| 65      | 299    | 3   | 9 | 1 | 20 | 1873 | 1892 | UGGU              | UCCA              | ge     | 1 |
| trf_1_2 | Bra010 | 19. |   |   |    |      |      | GGGGAUUAUAGCUCAGU | GUUCUCACCAGCAGAGC | Cleava |   |
| 67      | 299    | 3   | 9 | 1 | 25 | 1867 | 1892 | UGGU-AGAGC        | UAUUAUCCA         | ge     | 1 |
| trf_1_2 | Bra010 | 19. |   |   |    |      |      | GGGGAUUAUAGCUCAGU | ACCAGCAGAGCUAUAU  | Cleava |   |
| 68      | 299    | 3   | 9 | 1 | 20 | 1873 | 1892 | UGGU              | UCCA              | ge     | 1 |
| trf_1_2 | Bra010 | 19. |   |   |    |      |      | GGGGAUUAUAGCUCAGU | ACCAGCAGAGCUAUAU  | Cleava |   |
| 69      | 299    | 3   | 9 | 1 | 20 | 1873 | 1892 | UGGU              | UCCA              | ge     | 1 |
| trf_1_2 | Bra010 | 19. |   |   |    |      |      | GGGGAUUAUAGCUCAGU | UUCUCACCAGCAGAGCU | Cleava |   |
| 70      | 299    | 3   | 9 | 1 | 24 | 1868 | 1892 | UGGU-AGAG         | AUAUCCA           | ge     | 1 |
| trf_1_2 | Bra010 | 19. |   |   |    |      |      | GGGGAUUAUAGCUCAGU | ACCAGCAGAGCUAUAU  | Cleava |   |
| 83      | 299    | 3   | 9 | 1 | 20 | 1873 | 1892 | UGGU              | UCCA              | ge     | 1 |
| trf_1_2 | Bra010 | 19. |   |   |    |      |      | GGGGAUUAUAGCUCAGU | GUUCUCACCAGCAGAGC | Cleava |   |
| 84      | 299    | 3   | 9 | 1 | 25 | 1867 | 1892 | UGGU-AGAGC        | UAUUAUCCA         | ge     | 1 |
| trf_1_2 | Bra010 | 19. |   |   |    |      |      | GGGGAUUAUAGCUCAGU | ACCAGCAGAGCUAUAU  | Cleava |   |
| 85      | 299    | 3   | 9 | 1 | 20 | 1873 | 1892 | UGGU              | UCCA              | ge     | 1 |
| trf_1_2 | Bra010 | 19. |   |   |    |      |      | GGGGAUUAUAGCUCAGU | ACCAGCAGAGCUAUAU  | Cleava |   |
| 94      | 299    | 3   | 9 | 1 | 20 | 1873 | 1892 | UGGU              | UCCA              | ge     | 1 |
| trf_1_2 | Bra010 | 19. |   |   |    |      |      | GGGGAUUAUAGCUCAGU | GUUCUCACCAGCAGAGC | Cleava |   |
| 95      | 299    | 3   | 9 | 1 | 25 | 1867 | 1892 | UGGU-AGAGC        | UAUUAUCCA         | ge     | 1 |
| trf_1_2 | Bra010 | 19. |   |   |    |      |      | GGGGAUUAUAGCUCAGU | ACCAGCAGAGCUAUAU  | Cleava |   |
| 96      | 299    | 3   | 9 | 1 | 20 | 1873 | 1892 | UGGU              | UCCA              | ge     | 1 |
| trf_1_2 | Bra010 | 19. |   |   |    |      |      | GGGGAUUAUAGCUCAGU | UUCUCACCAGCAGAGCU | Cleava |   |
| 98      | 299    | 3   | 9 | 1 | 24 | 1868 | 1892 | UGGU-AGAG         | AUAUCCA           | ge     | 1 |
| trf_1_3 | Bra010 | 19. |   |   |    |      |      | GGGGAUUAUAGCUCAGU | ACCAGCAGAGCUAUAU  | Cleava |   |
| 01      | 299    | 3   | 9 | 1 | 20 | 1873 | 1892 | UGGU              | UCCA              | ge     | 1 |
| trf_1_3 | Bra010 | 19. |   |   |    |      |      | GGGGAUUAUAGCUCAGU | GUUCUCACCAGCAGAGC | Cleava |   |
| 03      | 299    | 3   | 9 | 1 | 25 | 1867 | 1892 | UGGU-AGAGC        | UAUUAUCCA         | ge     | 1 |
| trf_1_3 | Bra010 | 19. |   |   |    |      |      | GGGGAUUAUAGCUCAGU | ACCAGCAGAGCUAUAU  | Cleava |   |
| 04      | 299    | 3   | 9 | 1 | 20 | 1873 | 1892 | UGGU              | UCCA              | ge     | 1 |
| trf_1_3 | Bra010 | 19. |   |   |    |      |      | GGGGAUUAUAGCUCAGU | ACCAGCAGAGCUAUAU  | Cleava |   |
| 05      | 299    | 3   | 9 | 1 | 20 | 1873 | 1892 | UGGU              | UCCA              | ge     | 1 |
| trf_1_3 | Bra010 | 19. |   |   |    |      |      | GGGGAUUAUAGCUCAGU | ACCAGCAGAGCUAUAU  | Cleava |   |
| 08      | 299    | 3   | 9 | 1 | 20 | 1873 | 1892 | UGGU              | UCCA              | ge     | 1 |

|         |        |     |   |   |    |      |      |                   |                   |        |   |
|---------|--------|-----|---|---|----|------|------|-------------------|-------------------|--------|---|
| trf_1_3 | Bra010 | 19. |   |   |    |      |      | GGGGAUUAUAGCUCAGU | GUUCUCACCAGCAGAGC | Cleava |   |
| 09      | 299    | 3   | 9 | 1 | 25 | 1867 | 1892 | UGGU-AGAGC        | UAUAUUCCA         | ge     | 1 |
| trf_1_3 | Bra010 | 19. |   |   |    |      |      | GGGGAUUAUAGCUCAGU | ACCAGCAGAGCUAUAU  | Cleava |   |
| 10      | 299    | 3   | 9 | 1 | 20 | 1873 | 1892 | UGGU              | UCCA              | ge     | 1 |
| trf_1_3 | Bra010 | 19. |   |   |    |      |      | GGGGAUUAUAGCUCAGU | UUCUCACCAGCAGAGCU | Cleava |   |
| 15      | 299    | 3   | 9 | 1 | 24 | 1868 | 1892 | UGGU-AGAG         | AUAUUCCA          | ge     | 1 |
| trf_1_3 | Bra010 | 19. |   |   |    |      |      | GGGGAUUAUAGCUCAGU | GUUCUCACCAGCAGAGC | Cleava |   |
| 16      | 299    | 3   | 9 | 1 | 25 | 1867 | 1892 | UGGU-AGAGC        | UAUAUUCCA         | ge     | 1 |
| trf_1_3 | Bra010 | 19. |   |   |    |      |      | GGGGAUUAUAGCUCAGU | ACCAGCAGAGCUAUAU  | Cleava |   |
| 17      | 299    | 3   | 9 | 1 | 20 | 1873 | 1892 | UGGU              | UCCA              | ge     | 1 |
| trf_1_3 | Bra010 | 19. |   |   |    |      |      | GGGGAUUAUAGCUCAGU | ACCAGCAGAGCUAUAU  | Cleava |   |
| 18      | 299    | 3   | 9 | 1 | 20 | 1873 | 1892 | UGGU              | UCCA              | ge     | 1 |
| trf_1_3 | Bra010 | 19. |   |   |    |      |      | GGGGAUUAUAGCUCAGU | GUUCUCACCAGCAGAGC | Cleava |   |
| 21      | 299    | 3   | 9 | 1 | 25 | 1867 | 1892 | UGGU-AGAGC        | UAUAUUCCA         | ge     | 1 |
| trf_1_3 | Bra010 | 19. |   |   |    |      |      | GGGGAUUAUAGCUCAGU | ACCAGCAGAGCUAUAU  | Cleava |   |
| 24      | 299    | 3   | 9 | 1 | 20 | 1873 | 1892 | UGGU              | UCCA              | ge     | 1 |
| trf_1_3 | Bra010 | 19. |   |   |    |      |      | GGGGAUUAUAGCUCAGU | ACCAGCAGAGCUAUAU  | Cleava |   |
| 25      | 299    | 3   | 9 | 1 | 20 | 1873 | 1892 | UGGU              | UCCA              | ge     | 1 |
| trf_1_3 | Bra010 | 19. |   |   |    |      |      | GGGGAUUAUAGCUCAGU | ACCAGCAGAGCUAUAU  | Cleava |   |
| 33      | 299    | 3   | 9 | 1 | 20 | 1873 | 1892 | UGGU              | UCCA              | ge     | 1 |
| trf_1_3 | Bra010 | 19. |   |   |    |      |      | GGGGAUUAUAGCUCAGU | ACCAGCAGAGCUAUAU  | Cleava |   |
| 34      | 299    | 3   | 9 | 1 | 20 | 1873 | 1892 | UGGU              | UCCA              | ge     | 1 |
| trf_1_3 | Bra010 | 19. |   |   |    |      |      | GGGGAUUAUAGCUCAGU | GUUCUCACCAGCAGAGC | Cleava |   |
| 35      | 299    | 3   | 9 | 1 | 25 | 1867 | 1892 | UGGU-AGAGC        | UAUAUUCCA         | ge     | 1 |
| trf_1_3 | Bra010 | 19. |   |   |    |      |      | GGGGAUUAUAGCUCAGU | ACCAGCAGAGCUAUAU  | Cleava |   |
| 39      | 299    | 3   | 9 | 1 | 20 | 1873 | 1892 | UGGU              | UCCA              | ge     | 1 |
| trf_1_3 | Bra010 | 19. |   |   |    |      |      | GGGGAUUAUAGCUCAGU | GUUCUCACCAGCAGAGC | Cleava |   |
| 40      | 299    | 3   | 9 | 1 | 25 | 1867 | 1892 | UGGU-AGAGC        | UAUAUUCCA         | ge     | 1 |
| trf_1_3 | Bra010 | 19. |   |   |    |      |      | GGGGAUUAUAGCUCAGU | ACCAGCAGAGCUAUAU  | Cleava |   |
| 42      | 299    | 3   | 9 | 1 | 20 | 1873 | 1892 | UGGU              | UCCA              | ge     | 1 |
| trf_1_3 | Bra010 | 19. |   |   |    |      |      | GGGGAUUAUAGCUCAGU | ACCAGCAGAGCUAUAU  | Cleava |   |
| 43      | 299    | 3   | 9 | 1 | 20 | 1873 | 1892 | UGGU              | UCCA              | ge     | 1 |
| trf_1_3 | Bra010 | 19. |   |   |    |      |      | GGGGAUUAUAGCUCAGU | ACCAGCAGAGCUAUAU  | Cleava |   |
| 44      | 299    | 3   | 9 | 1 | 20 | 1873 | 1892 | UGGU              | UCCA              | ge     | 1 |

|         |        |     |   |   |    |      |      |                   |                   |          |   |
|---------|--------|-----|---|---|----|------|------|-------------------|-------------------|----------|---|
| trf_1_3 | Bra010 | 19. |   |   |    |      |      | GGGGAUUAUAGCUCAGU | ACCAGCAGAGCUAUUAU | Cleavage |   |
| 52      | 299    | 3   | 9 | 1 | 20 | 1873 | 1892 | UGGU              | UCCA              | ge       | 1 |
| trf_1_3 | Bra010 | 19. |   |   |    |      |      | GGGGAUUAUAGCUCAGU | ACCAGCAGAGCUAUUAU | Cleavage |   |
| 54      | 299    | 3   | 9 | 1 | 20 | 1873 | 1892 | UGGU              | UCCA              | ge       | 1 |
| trf_1_3 | Bra010 | 19. |   |   |    |      |      | GGGGAUUAUAGCUCAGU | ACCAGCAGAGCUAUUAU | Cleavage |   |
| 55      | 299    | 3   | 9 | 1 | 20 | 1873 | 1892 | UGGU              | UCCA              | ge       | 1 |
| trf_1_3 | Bra010 | 19. |   |   |    |      |      | GGGGAUUAUAGCUCAGU | ACCAGCAGAGCUAUUAU | Cleavage |   |
| 56      | 299    | 3   | 9 | 1 | 20 | 1873 | 1892 | UGGU              | UCCA              | ge       | 1 |
| trf_1_3 | Bra010 | 19. |   |   |    |      |      | GGGGAUUAUAGCUCAGU | GUUCUCACCAGCAGAGC | Cleavage |   |
| 57      | 299    | 3   | 9 | 1 | 25 | 1867 | 1892 | UGGU-AGAGC        | UAUAUUCCA         | ge       | 1 |
| trf_1_3 | Bra010 | 19. |   |   |    |      |      | GGGGAUUAUAGCUCAGU | UUCUCACCAGCAGAGCU | Cleavage |   |
| 58      | 299    | 3   | 9 | 1 | 24 | 1868 | 1892 | UGGU-AGAG         | AUAUUCCA          | ge       | 1 |
| trf_1_3 | Bra010 | 19. |   |   |    |      |      | GGGGAUUAUAGCUCAGU | ACCAGCAGAGCUAUUAU | Cleavage |   |
| 61      | 299    | 3   | 9 | 1 | 20 | 1873 | 1892 | UGGU              | UCCA              | ge       | 1 |
| trf_1_3 | Bra010 | 19. |   |   |    |      |      | GGGGAUUAUAGCUCAGU | ACCAGCAGAGCUAUUAU | Cleavage |   |
| 63      | 299    | 3   | 9 | 1 | 20 | 1873 | 1892 | UGGU              | UCCA              | ge       | 1 |
| trf_1_3 | Bra010 | 19. |   |   |    |      |      | GGGGAUUAUAGCUCAGU | GUUCUCACCAGCAGAGC | Cleavage |   |
| 64      | 299    | 3   | 9 | 1 | 25 | 1867 | 1892 | UGGU-AGAGC        | UAUAUUCCA         | ge       | 1 |
| trf_1_3 | Bra010 | 19. |   |   |    |      |      | GGGGAUUAUAGCUCAGU | ACCAGCAGAGCUAUUAU | Cleavage |   |
| 65      | 299    | 3   | 9 | 1 | 20 | 1873 | 1892 | UGGU              | UCCA              | ge       | 1 |
| trf_1_3 | Bra010 | 19. |   |   |    |      |      | GGGGAUUAUAGCUCAGU | ACCAGCAGAGCUAUUAU | Cleavage |   |
| 76      | 299    | 3   | 9 | 1 | 20 | 1873 | 1892 | UGGU              | UCCA              | ge       | 1 |
| trf_1_3 | Bra010 | 19. |   |   |    |      |      | GGGGAUUAUAGCUCAGU | ACCAGCAGAGCUAUUAU | Cleavage |   |
| 77      | 299    | 3   | 9 | 1 | 20 | 1873 | 1892 | UGGU              | UCCA              | ge       | 1 |
| trf_1_3 | Bra010 | 19. |   |   |    |      |      | GGGGAUUAUAGCUCAGU | GUUCUCACCAGCAGAGC | Cleavage |   |
| 78      | 299    | 3   | 9 | 1 | 25 | 1867 | 1892 | UGGU-AGAGC        | UAUAUUCCA         | ge       | 1 |
| trf_1_3 | Bra010 | 19. |   |   |    |      |      | GGGGAUUAUAGCUCAGU | ACCAGCAGAGCUAUUAU | Cleavage |   |
| 80      | 299    | 3   | 9 | 1 | 20 | 1873 | 1892 | UGGU              | UCCA              | ge       | 1 |
| trf_1_3 | Bra010 | 19. |   |   |    |      |      | GGGGAUUAUAGCUCAGU | ACCAGCAGAGCUAUUAU | Cleavage |   |
| 84      | 299    | 3   | 9 | 1 | 20 | 1873 | 1892 | UGGU              | UCCA              | ge       | 1 |
| trf_1_3 | Bra010 | 19. |   |   |    |      |      | GGGGAUUAUAGCUCAGU | ACCAGCAGAGCUAUUAU | Cleavage |   |
| 85      | 299    | 3   | 9 | 1 | 20 | 1873 | 1892 | UGGU              | UCCA              | ge       | 1 |
| trf_1_3 | Bra010 | 19. |   |   |    |      |      | GGGGAUUAUAGCUCAGU | GUUCUCACCAGCAGAGC | Cleavage |   |
| 86      | 299    | 3   | 9 | 1 | 25 | 1867 | 1892 | UGGU-AGAGC        | UAUAUUCCA         | ge       | 1 |



|         |        |     |   |   |    |      |      |                   |                   |          |   |
|---------|--------|-----|---|---|----|------|------|-------------------|-------------------|----------|---|
| trf_1_3 | Bra010 | 19. |   |   |    |      |      | GGGGAUUAUAGCUCAGU | ACCAGCAGAGCUAUUAU | Cleavage |   |
| 87      | 299    | 3   | 9 | 1 | 20 | 1873 | 1892 | UGGU              | UCCA              | ge       | 1 |
| trf_1_3 | Bra010 | 19. |   |   |    |      |      | GGGGAUUAUAGCUCAGU | ACCAGCAGAGCUAUUAU | Cleavage |   |
| 94      | 299    | 3   | 9 | 1 | 20 | 1873 | 1892 | UGGU              | UCCA              | ge       | 1 |
| trf_1_3 | Bra010 | 19. |   |   |    |      |      | GGGGAUUAUAGCUCAGU | GUUCUCACCAGCAGAGC | Cleavage |   |
| 95      | 299    | 3   | 9 | 1 | 25 | 1867 | 1892 | UGGU-AGAGC        | UAUAUUCCA         | ge       | 1 |
| trf_1_3 | Bra010 | 19. |   |   |    |      |      | GGGGAUUAUAGCUCAGU | ACCAGCAGAGCUAUUAU | Cleavage |   |
| 96      | 299    | 3   | 9 | 1 | 20 | 1873 | 1892 | UGGU              | UCCA              | ge       | 1 |
| trf_1_3 | Bra010 | 19. |   |   |    |      |      | GGGGAUUAUAGCUCAGU | ACCAGCAGAGCUAUUAU | Cleavage |   |
| 97      | 299    | 3   | 9 | 1 | 20 | 1873 | 1892 | UGGU              | UCCA              | ge       | 1 |
| trf_1_4 | Bra010 | 19. |   |   |    |      |      | GGGGAUUAUAGCUCAGU | GUUCUCACCAGCAGAGC | Cleavage |   |
| 01      | 299    | 3   | 9 | 1 | 25 | 1867 | 1892 | UGGU-AGAGC        | UAUAUUCCA         | ge       | 1 |
| trf_1_4 | Bra010 | 19. |   |   |    |      |      | GGGGAUUAUAGCUCAGU | ACCAGCAGAGCUAUUAU | Cleavage |   |
| 02      | 299    | 3   | 9 | 1 | 20 | 1873 | 1892 | UGGU              | UCCA              | ge       | 1 |
| trf_1_4 | Bra010 | 19. |   |   |    |      |      | GGGGAUUAUAGCUCAGU | ACCAGCAGAGCUAUUAU | Cleavage |   |
| 03      | 299    | 3   | 9 | 1 | 20 | 1873 | 1892 | UGGU              | UCCA              | ge       | 1 |
| trf_1_4 | Bra010 | 19. |   |   |    |      |      | GGGGAUUAUAGCUCAGU | UUCUCACCAGCAGAGCU | Cleavage |   |
| 05      | 299    | 3   | 9 | 1 | 24 | 1868 | 1892 | UGGU-AGAG         | AUAUUCCA          | ge       | 1 |
| trf_1_4 | Bra010 | 19. |   |   |    |      |      | GGGGAUUAUAGCUCAGU | ACCAGCAGAGCUAUUAU | Cleavage |   |
| 06      | 299    | 3   | 9 | 1 | 20 | 1873 | 1892 | UGGU              | UCCA              | ge       | 1 |
| trf_1_4 | Bra010 | 19. |   |   |    |      |      | GGGGAUUAUAGCUCAGU | ACCAGCAGAGCUAUUAU | Cleavage |   |
| 07      | 299    | 3   | 9 | 1 | 20 | 1873 | 1892 | UGGU              | UCCA              | ge       | 1 |
| trf_1_4 | Bra010 | 19. |   |   |    |      |      | GGGGAUUAUAGCUCAGU | GUUCUCACCAGCAGAGC | Cleavage |   |
| 09      | 299    | 3   | 9 | 1 | 25 | 1867 | 1892 | UGGU-AGAGC        | UAUAUUCCA         | ge       | 1 |
| trf_1_4 | Bra010 | 19. |   |   |    |      |      | GGGGAUUAUAGCUCAGU | ACCAGCAGAGCUAUUAU | Cleavage |   |
| 11      | 299    | 3   | 9 | 1 | 20 | 1873 | 1892 | UGGU              | UCCA              | ge       | 1 |
| trf_1_4 | Bra010 | 19. |   |   |    |      |      | GGGGAUUAUAGCUCAGU | ACCAGCAGAGCUAUUAU | Cleavage |   |
| 83      | 299    | 3   | 9 | 1 | 20 | 1873 | 1892 | UGGU              | UCCA              | ge       | 1 |
| trf_1_4 | Bra010 | 19. |   |   |    |      |      | GGGGAUUAUAGCUCAGU | ACCAGCAGAGCUAUUAU | Cleavage |   |
| 84      | 299    | 3   | 9 | 1 | 20 | 1873 | 1892 | UGGU              | UCCA              | ge       | 1 |
| trf_1_4 | Bra010 | 19. |   |   |    |      |      | GGGGAUUAUAGCUCAGU | ACCAGCAGAGCUAUUAU | Cleavage |   |
| 85      | 299    | 3   | 9 | 1 | 20 | 1873 | 1892 | UGGU              | UCCA              | ge       | 1 |
| trf_1_4 | Bra010 | 19. |   |   |    |      |      | GGGGAUUAUAGCUCAGU | GUUCUCACCAGCAGAGC | Cleavage |   |
| 87      | 299    | 3   | 9 | 1 | 25 | 1867 | 1892 | UGGU-AGAGC        | UAUAUUCCA         | ge       | 1 |

|         |        |     |   |   |    |      |      |                   |                   |        |   |
|---------|--------|-----|---|---|----|------|------|-------------------|-------------------|--------|---|
| trf_1_4 | Bra010 | 19. |   |   |    |      |      | GGGGAUUAUAGCUCAGU | ACCAGCAGAGCUAUUAU | Cleava |   |
| 88      | 299    | 3   | 9 | 1 | 20 | 1873 | 1892 | UGGU              | UCCA              | ge     | 1 |
| trf_1_4 | Bra010 | 19. |   |   |    |      |      | GGGGAUUAUAGCUCAGU | ACCAGCAGAGCUAUUAU | Cleava |   |
| 90      | 299    | 3   | 9 | 1 | 20 | 1873 | 1892 | UGGU              | UCCA              | ge     | 1 |
| trf_1_4 | Bra010 | 19. |   |   |    |      |      | GGGGAUUAUAGCUCAGU | GUUCUCACCAGCAGAGC | Cleava |   |
| 91      | 299    | 3   | 9 | 1 | 25 | 1867 | 1892 | UGGU-AGAGC        | UAUAUUCCA         | ge     | 1 |
| trf_1_4 | Bra010 | 19. |   |   |    |      |      | GGGGAUUAUAGCUCAGU | ACCAGCAGAGCUAUUAU | Cleava |   |
| 92      | 299    | 3   | 9 | 1 | 20 | 1873 | 1892 | UGGU              | UCCA              | ge     | 1 |
| trf_1_4 | Bra010 | 19. |   |   |    |      |      | GGGGAUUAUAGCUCAGU | ACCAGCAGAGCUAUUAU | Cleava |   |
| 93      | 299    | 3   | 9 | 1 | 20 | 1873 | 1892 | UGGU              | UCCA              | ge     | 1 |
| trf_1_4 | Bra010 | 19. |   |   |    |      |      | GGGGAUUAUAGCUCAGU | UUCUCACCAGCAGAGCU | Cleava |   |
| 95      | 299    | 3   | 9 | 1 | 24 | 1868 | 1892 | UGGU-AGAG         | AUAUUCCA          | ge     | 1 |
| trf_1_5 | Bra010 | 19. |   |   |    |      |      | GGGGAUUAUAGCUCAGU | ACCAGCAGAGCUAUUAU | Cleava |   |
| 00      | 299    | 3   | 9 | 1 | 20 | 1873 | 1892 | UGGU              | UCCA              | ge     | 1 |
| trf_1_5 | Bra010 | 19. |   |   |    |      |      | GGGGAUUAUAGCUCAGU | UUCUCACCAGCAGAGCU | Cleava |   |
| 01      | 299    | 3   | 9 | 1 | 24 | 1868 | 1892 | UGGU-AGAG         | AUAUUCCA          | ge     | 1 |
| trf_1_5 | Bra010 | 19. |   |   |    |      |      | GGGGAUUAUAGCUCAGU | ACCAGCAGAGCUAUUAU | Cleava |   |
| 02      | 299    | 3   | 9 | 1 | 20 | 1873 | 1892 | UGGU              | UCCA              | ge     | 1 |
| trf_1_5 | Bra010 | 19. |   |   |    |      |      | GGGGAUUAUAGCUCAGU | GUUCUCACCAGCAGAGC | Cleava |   |
| 03      | 299    | 3   | 9 | 1 | 25 | 1867 | 1892 | UGGU-AGAGC        | UAUAUUCCA         | ge     | 1 |
| trf_1_5 | Bra010 | 19. |   |   |    |      |      | GGGGAUUAUAGCUCAGU | ACCAGCAGAGCUAUUAU | Cleava |   |
| 04      | 299    | 3   | 9 | 1 | 20 | 1873 | 1892 | UGGU              | UCCA              | ge     | 1 |
| trf_1_2 | Bra010 | 20. |   |   |    |      |      | GCGUCCAUUGUCUAAU  | AUGCAUCAGAUAGUGG  | Cleava |   |
| 71      | 618    | 3   | 4 | 1 | 20 | 442  | 461  | GGAU              | ACGC              | ge     | 1 |
| trf_1_2 | Bra010 | 20. |   |   |    |      |      | GCGUCCAUUGUCUAAU  | AUGCAUCAGAUAGUGG  | Cleava |   |
| 72      | 618    | 3   | 4 | 1 | 20 | 442  | 461  | GGAU              | ACGC              | ge     | 1 |
| trf_1_2 | Bra010 | 20. |   |   |    |      |      | GCGUCCAUUGUCUAAU  | AUGCAUCAGAUAGUGG  | Cleava |   |
| 73      | 618    | 3   | 4 | 1 | 20 | 442  | 461  | GGAU              | ACGC              | ge     | 1 |
| trf_1_2 | Bra010 | 20. |   |   |    |      |      | GCGUCCAUUGUCUAAU  | AUGCAUCAGAUAGUGG  | Cleava |   |
| 74      | 618    | 3   | 4 | 1 | 20 | 442  | 461  | GGAU              | ACGC              | ge     | 1 |
| trf_1_2 | Bra010 | 20. |   |   |    |      |      | GCGUCCAUUGUCUAAU  | AUGCAUCAGAUAGUGG  | Cleava |   |
| 75      | 618    | 3   | 4 | 1 | 20 | 442  | 461  | GGAU              | ACGC              | ge     | 1 |
| trf_1_2 | Bra010 | 20. |   |   |    |      |      | GCGUCCAUUGUCUAAU  | AUGCAUCAGAUAGUGG  | Cleava |   |
| 76      | 618    | 3   | 4 | 1 | 20 | 442  | 461  | GGAU              | ACGC              | ge     | 1 |

|         |        |     |     |   |    |      |      |                    |                   |        |   |
|---------|--------|-----|-----|---|----|------|------|--------------------|-------------------|--------|---|
| trf_1_2 | Bra010 | 20. |     |   |    |      |      | GCGUCCAUUGUCUAAU   | AUGCAUCAGAUAGUGG  | Cleava |   |
| 78      | 618    | 3   | 4   | 1 | 20 | 442  | 461  | GGAU               | ACGC              | ge     | 1 |
| trf_1_2 | Bra010 | 20. |     |   |    |      |      | GCGUCCAUUGUCUAAU   | AUGCAUCAGAUAGUGG  | Cleava |   |
| 79      | 618    | 3   | 4   | 1 | 20 | 442  | 461  | GGAU               | ACGC              | ge     | 1 |
| trf_1_7 | Bra011 | 21. |     |   |    |      |      | GCGCCUGUAGCUCAGU   | UUCCACUGAGGUGAAG  | Transl |   |
| 6       | 329    | 3   | 7   | 1 | 20 | 399  | 418  | GGAA               | GCGC              | ation  | 1 |
| trf_1_4 | Bra011 | 15. |     |   |    |      |      | GGGAUCGUAGUUCAAU   | CAGAACAAUUUAACUAC | Cleava |   |
| 28      | 657    | 3   | 7   | 1 | 23 | 764  | 786  | UGGUCAG            | GGUUCC            | ge     | 1 |
| trf_1_4 | Bra011 | 15. |     |   |    |      |      | GGGAUUGUAGUUAUUAAU | CAGAACAAUUUAACUAC | Cleava |   |
| 64      | 657    | 2.5 | 7   | 1 | 23 | 764  | 786  | UGGUCAG            | GGUUCC            | ge     | 1 |
| trf_1_9 | Bra012 | 18. |     |   |    |      |      | UCCGUUGUCGUCCAGCG  | AAUCGCUGAACCACAAC | Transl |   |
| 4       | 143    | 2.5 | 5   | 1 | 20 | 392  | 411  | GUU                | GGA               | ation  | 1 |
| trf_1_9 | Bra012 | 18. |     |   |    |      |      | UCCGUUGUCGUCCAGCG  | AAUCGCUGAACCACAAC | Transl |   |
| 5       | 143    | 2.5 | 5   | 1 | 20 | 392  | 411  | GUU                | GGA               | ation  | 1 |
| trf_1_2 | Bra012 | 18. |     |   |    |      |      | UCCGUUGUCGUCCAGCG  | AAUCGCUGAACCACAAC | Transl |   |
| 59      | 143    | 2.5 | 5   | 1 | 20 | 392  | 411  | GUU                | GGA               | ation  | 1 |
| trf_1_2 | Bra012 | 18. |     |   |    |      |      | UCCGUUGUCGUCCAGCG  | AAUCGCUGAACCACAAC | Transl |   |
| 61      | 143    | 2.5 | 5   | 1 | 20 | 392  | 411  | GUU                | GGA               | ation  | 1 |
| trf_1_2 | Bra012 | 18. |     |   |    |      |      | UCCGUUGUCGUCCAGCG  | AAUCGCUGAACCACAAC | Transl |   |
| 87      | 143    | 2.5 | 5   | 1 | 20 | 392  | 411  | GUU                | GGA               | ation  | 1 |
| trf_1_2 | Bra012 | 18. |     |   |    |      |      | UCCGUUGUCGUCCAGCG  | AAUCGCUGAACCACAAC | Transl |   |
| 88      | 143    | 2.5 | 5   | 1 | 20 | 392  | 411  | GUU                | GGA               | ation  | 1 |
| trf_1_5 | Bra012 | 18. |     |   |    |      |      | UCCGUUGUCGUCCAGCG  | AAUCGCUGAACCACAAC | Transl |   |
| 10      | 143    | 2.5 | 5   | 1 | 20 | 392  | 411  | GUU                | GGA               | ation  | 1 |
| trf_1_5 | Bra012 | 18. |     |   |    |      |      | UCCGUUGUCGUCCAGCG  | AAUCGCUGAACCACAAC | Transl |   |
| 11      | 143    | 2.5 | 5   | 1 | 20 | 392  | 411  | GUU                | GGA               | ation  | 1 |
| trf_1_5 | Bra012 | 18. |     |   |    |      |      | UCCGUUGUCGUCCAGCG  | AAUCGCUGAACCACAAC | Transl |   |
| 12      | 143    | 2.5 | 5   | 1 | 20 | 392  | 411  | GUU                | GGA               | ation  | 1 |
| trf_1_4 | Bra012 |     |     |   |    |      |      | GGGAUUGUAGUUCAAU   | UUCAAUUCAAUUACAA  | Cleava |   |
| 52      | 183    | 3   | 9.2 | 1 | 20 | 301  | 320  | UGAA               | UUCG              | ge     | 1 |
| trf_1_5 | Bra012 | 15. |     |   |    |      |      | GUCUGGGUGGUGUAGU   | ACCGGUUGCACCGUCCG | Cleava |   |
| 4       | 326    | 3   | 0   | 1 | 20 | 1326 | 1345 | CGGU               | GAC               | ge     | 1 |
| trf_1_1 | Bra012 | 15. |     |   |    |      |      | GUCUGGGUGGUGUAGU   | ACCGGUUGCACCGUCCG | Cleava |   |
| 88      | 326    | 3   | 0   | 1 | 20 | 1326 | 1345 | CGGU               | GAC               | ge     | 1 |

|         |        |     |   |   |    |      |      |                   |                   |        |   |
|---------|--------|-----|---|---|----|------|------|-------------------|-------------------|--------|---|
| trf_1_5 | Bra012 | 15. |   |   |    |      |      | GUCUGGGUGGUGUAGU  | ACCGGUUGCACCGUCCG | Cleava |   |
| 28      | 326    | 3   | 0 | 1 | 20 | 1326 | 1345 | CGGU              | GAC               | ge     | 1 |
| trf_1_1 | Bra012 | 14. |   |   |    |      |      | AGGGAUAUAACUCAGCG | UACCUUUGAGUUAUGU  | Cleava |   |
| 95      | 734    | 3   | 1 | 1 | 20 | 1709 | 1728 | GUA               | UUCU              | ge     | 1 |
| trf_1_1 | Bra012 | 14. |   |   |    |      |      | AGGGAUAUAACUCAGCG | UACCUUUGAGUUAUGU  | Cleava |   |
| 96      | 734    | 3   | 1 | 1 | 20 | 1709 | 1728 | GUA               | UUCU              | ge     | 1 |
| trf_1_1 | Bra012 | 14. |   |   |    |      |      | AGGGAUAUAACUCAGCG | UACCUUUGAGUUAUGU  | Cleava |   |
| 97      | 734    | 3   | 1 | 1 | 20 | 1709 | 1728 | GUA               | UUCU              | ge     | 1 |
| trf_1_1 | Bra012 | 14. |   |   |    |      |      | AGGGAUAUAACUCAGCG | UACCUUUGAGUUAUGU  | Cleava |   |
| 98      | 734    | 3   | 1 | 1 | 20 | 1709 | 1728 | GUA               | UUCU              | ge     | 1 |
| trf_1_1 | Bra012 | 14. |   |   |    |      |      | AGGGAUAUAACUCAGCG | UACCUUUGAGUUAUGU  | Cleava |   |
| 99      | 734    | 3   | 1 | 1 | 20 | 1709 | 1728 | GUA               | UUCU              | ge     | 1 |
| trf_1_2 | Bra013 | 18. |   |   |    |      |      | GGGUCGAUGCCCGAGCG | UAACCGAUCGGGCCUCG | Cleava |   |
| 11      | 150    | 2.5 | 5 | 1 | 21 | 93   | 113  | GUUA              | AUCC              | ge     | 1 |
| trf_1_2 | Bra013 | 18. |   |   |    |      |      | GGGUCGAUGCCCGAGCG | UAACCGAUCGGGCCUCG | Cleava |   |
| 13      | 150    | 2.5 | 5 | 1 | 21 | 93   | 113  | GUUA              | AUCC              | ge     | 1 |
| trf_1_2 | Bra013 | 18. |   |   |    |      |      | GGGUCGAUGCCCGAGCG | UAACCGAUCGGGCCUCG | Cleava |   |
| 18      | 150    | 2.5 | 5 | 1 | 21 | 93   | 113  | GUUA              | AUCC              | ge     | 1 |
| trf_1_2 | Bra013 | 18. |   |   |    |      |      | GGGUCGAUGCCCGAGCG | UAACCGAUCGGGCCUCG | Cleava |   |
| 19      | 150    | 2.5 | 5 | 1 | 21 | 93   | 113  | GUUA              | AUCC              | ge     | 1 |
| trf_1_2 | Bra013 | 18. |   |   |    |      |      | GGGUCGAUGCCCGAGCG | GCUAACCGAUCGGGCCU | Cleava |   |
| 20      | 150    | 2.5 | 5 | 1 | 23 | 91   | 113  | GUUAAC            | CGAUCC            | ge     | 1 |
| trf_1_2 | Bra013 | 18. |   |   |    |      |      | GGGUCGAUGCCCGAGCG | UAACCGAUCGGGCCUCG | Cleava |   |
| 23      | 150    | 2.5 | 5 | 1 | 21 | 93   | 113  | GUUA              | AUCC              | ge     | 1 |
| trf_1_2 | Bra013 | 18. |   |   |    |      |      | GGGUCGAUGCCCGAGCG | UAACCGAUCGGGCCUCG | Cleava |   |
| 24      | 150    | 2.5 | 5 | 1 | 21 | 93   | 113  | GUUA              | AUCC              | ge     | 1 |
| trf_1_2 | Bra013 | 18. |   |   |    |      |      | GGGUCGAUGCCCGAGCG | UAACCGAUCGGGCCUCG | Cleava |   |
| 25      | 150    | 2.5 | 5 | 1 | 21 | 93   | 113  | GUUA              | AUCC              | ge     | 1 |
| trf_1_2 | Bra013 | 18. |   |   |    |      |      | GGGUCGAUGCCCGAGCG | UAACCGAUCGGGCCUCG | Cleava |   |
| 26      | 150    | 2.5 | 5 | 1 | 21 | 93   | 113  | GUUA              | AUCC              | ge     | 1 |
| trf_1_2 | Bra013 | 18. |   |   |    |      |      | GGGUCGAUGCCCGAGCG | CUAACCGAUCGGGCCUC | Cleava |   |
| 28      | 150    | 2.5 | 5 | 1 | 22 | 92   | 113  | GUUAG             | GAUCC             | ge     | 1 |
| trf_1_2 | Bra013 | 18. |   |   |    |      |      | GGGUCGAUGCCCGAGCG | CUAACCGAUCGGGCCUC | Cleava |   |
| 29      | 150    | 2.5 | 5 | 1 | 22 | 92   | 113  | GUUAG             | GAUCC             | ge     | 1 |

|         |        |     |   |   |    |     |                  |                   |        |   |
|---------|--------|-----|---|---|----|-----|------------------|-------------------|--------|---|
| trf_1_4 | Bra013 | 19. |   |   |    |     | GGGAUUGUAGUUCAAU | ACUAAUUGAACUAAGA  | Cleava |   |
| 14      | 336    | 3   | 5 | 1 | 20 | 267 | 286 UGGU         | UCUC              | ge     | 1 |
| trf_1_4 | Bra013 | 19. |   |   |    |     | GGGAUUGUAGUUCAAU | ACUAAUUGAACUAAGA  | Cleava |   |
| 15      | 336    | 3   | 5 | 1 | 20 | 267 | 286 UGGU         | UCUC              | ge     | 1 |
| trf_1_4 | Bra013 | 19. |   |   |    |     | GGGAUUGUAGUUCAAU | ACUAAUUGAACUAAGA  | Cleava |   |
| 16      | 336    | 3   | 5 | 1 | 20 | 267 | 286 UGGU         | UCUC              | ge     | 1 |
| trf_1_4 | Bra013 | 19. |   |   |    |     | GGGAUUGUAGUUCAAU | ACUAAUUGAACUAAGA  | Cleava |   |
| 22      | 336    | 3   | 5 | 1 | 20 | 267 | 286 UGGU         | UCUC              | ge     | 1 |
| trf_1_4 | Bra013 | 19. |   |   |    |     | GGGAUUGUAGUUCAAU | ACUAAUUGAACUAAGA  | Cleava |   |
| 23      | 336    | 3   | 5 | 1 | 20 | 267 | 286 UGGU         | UCUC              | ge     | 1 |
| trf_1_4 | Bra013 | 19. |   |   |    |     | GGGAUUGUAGUUCAAU | ACUAAUUGAACUAAGA  | Cleava |   |
| 24      | 336    | 3   | 5 | 1 | 20 | 267 | 286 UGGU         | UCUC              | ge     | 1 |
| trf_1_4 | Bra013 | 19. |   |   |    |     | GGGAUUGUAGUUCAAU | ACUAAUUGAACUAAGA  | Cleava |   |
| 26      | 336    | 3   | 5 | 1 | 20 | 267 | 286 UGGU         | UCUC              | ge     | 1 |
| trf_1_4 | Bra013 | 19. |   |   |    |     | GGGAUCGUAGUUCAAU | ACUAAUUGAACUAAGA  | Cleava |   |
| 28      | 336    | 2.5 | 5 | 1 | 20 | 267 | 286 UGGU         | UCUC              | ge     | 1 |
| trf_1_4 | Bra013 | 19. |   |   |    |     | GGGAUUGUAGUUCAAU | ACUAAUUGAACUAAGA  | Cleava |   |
| 29      | 336    | 3   | 5 | 1 | 20 | 267 | 286 UGGU         | UCUC              | ge     | 1 |
| trf_1_4 | Bra013 | 19. |   |   |    |     | GGGAUUGUAGUUCAAU | ACUAAUUGAACUAAGA  | Cleava |   |
| 31      | 336    | 3   | 5 | 1 | 20 | 267 | 286 UGGU         | UCUC              | ge     | 1 |
| trf_1_4 | Bra013 | 19. |   |   |    |     | GGGAUUGUAGUUCAAU | CCAACUAAUUGAACUAA | Cleava |   |
| 38      | 336    | 3   | 5 | 1 | 23 | 264 | 286 UGGUCGG      | GAUCUC            | ge     | 1 |
| trf_1_4 | Bra013 | 19. |   |   |    |     | GGGAUUGUAGUUCAAU | CCAACUAAUUGAACUAA | Cleava |   |
| 39      | 336    | 3   | 5 | 1 | 23 | 264 | 286 UGGUCGG      | GAUCUC            | ge     | 1 |
| trf_1_4 | Bra013 | 19. |   |   |    |     | GGGAUUGUAGUUCAAU | CCAACUAAUUGAACUAA | Cleava |   |
| 40      | 336    | 3   | 5 | 1 | 23 | 264 | 286 UGGUCGG      | GAUCUC            | ge     | 1 |
| trf_1_4 | Bra013 | 19. |   |   |    |     | GGGAUUGUAGUUCAAU | CAACUAAUUGAACUAA  | Cleava |   |
| 43      | 336    | 3   | 5 | 1 | 22 | 265 | 286 UGGUCG       | GAUCUC            | ge     | 1 |
| trf_1_4 | Bra013 | 19. |   |   |    |     | GGGAUUGUAGUUCAAU | CCAACUAAUUGAACUAA | Cleava |   |
| 44      | 336    | 3   | 5 | 1 | 23 | 264 | 286 UGGUCGG      | GAUCUC            | ge     | 1 |
| trf_1_4 | Bra013 | 19. |   |   |    |     | GGGAUUGUAGUUCAAU | ACUAAUUGAACUAAGA  | Cleava |   |
| 49      | 336    | 3   | 5 | 1 | 20 | 267 | 286 UGGU         | UCUC              | ge     | 1 |
| trf_1_4 | Bra013 | 19. |   |   |    |     | GGGAUUGUAGUUCAAU | ACUAAUUGAACUAAGA  | Cleava |   |
| 50      | 336    | 3   | 5 | 1 | 20 | 267 | 286 UGGU         | UCUC              | ge     | 1 |

|         |        |     |   |   |    |      |      |                   |                   |        |   |
|---------|--------|-----|---|---|----|------|------|-------------------|-------------------|--------|---|
| trf_1_4 | Bra013 | 19. |   |   |    |      |      | GGGAUUGUAGUUCAAU  | ACUAAUUGAACUAAGA  | Cleava |   |
| 51      | 336    | 3   | 5 | 1 | 20 | 267  | 286  | UGGU              | UCUC              | ge     | 1 |
| trf_1_4 | Bra013 | 19. |   |   |    |      |      | GGGAUUGUAGUUCAAU  | ACUAAUUGAACUAAGA  | Cleava |   |
| 53      | 336    | 3   | 5 | 1 | 20 | 267  | 286  | UGGU              | UCUC              | ge     | 1 |
| trf_1_4 | Bra013 | 19. |   |   |    |      |      | GGGAUUGUAGUUCAAU  | ACUAAUUGAACUAAGA  | Cleava |   |
| 55      | 336    | 3   | 5 | 1 | 20 | 267  | 286  | UGGU              | UCUC              | ge     | 1 |
| trf_1_4 | Bra013 | 19. |   |   |    |      |      | GGGAUUGUAGUUCAAU  | AACUAAUUGAACUAAG  | Cleava |   |
| 57      | 336    | 3   | 5 | 1 | 21 | 266  | 286  | UGGUU             | AUCUC             | ge     | 1 |
| trf_1_4 | Bra013 | 19. |   |   |    |      |      | GGGAUUGUAGUUCAAU  | ACUAAUUGAACUAAGA  | Cleava |   |
| 58      | 336    | 3   | 5 | 1 | 20 | 267  | 286  | UGGU              | UCUC              | ge     | 1 |
| trf_1_4 | Bra013 | 19. |   |   |    |      |      | GGGAUUGUAGUUCAAU  | ACUAAUUGAACUAAGA  | Cleava |   |
| 63      | 336    | 3   | 5 | 1 | 20 | 267  | 286  | UGGU              | UCUC              | ge     | 1 |
| trf_1_4 | Bra013 | 19. |   |   |    |      |      | GGGAUUGUAGUUCAAU  | ACUAAUUGAACUAAGA  | Cleava |   |
| 67      | 336    | 3   | 5 | 1 | 20 | 267  | 286  | UGGU              | UCUC              | ge     | 1 |
| trf_1_4 | Bra013 | 19. |   |   |    |      |      | GGGAUUGUAGUUCAAU  | CCAACUAAUUGAACUAA | Cleava |   |
| 68      | 336    | 3   | 5 | 1 | 23 | 264  | 286  | UGGUUAG           | GAUCUC            | ge     | 1 |
| trf_1_4 | Bra013 | 19. |   |   |    |      |      | GGGAUUGUAGUUCAAU  | ACUAAUUGAACUAAGA  | Cleava |   |
| 71      | 336    | 3   | 5 | 1 | 20 | 267  | 286  | UGGU              | UCUC              | ge     | 1 |
| trf_1_1 | Bra013 | 14. |   |   |    |      |      | GGGGAUUAUAGCUCAGU | UCCCUACAGAGUUGUA  | Cleava |   |
| 4       | 348    | 3   | 5 | 1 | 21 | 1004 | 1024 | UGGGA             | UCCCC             | ge     | 1 |
| trf_1_1 | Bra013 | 22. |   |   |    |      |      | UCCGUUGUAGUCUAGC  | CAUCAUCAGCUUGGCU  | Cleava |   |
| 1       | 528    | 3   | 0 | 1 | 24 | 196  | 219  | UGGUUAGG          | AUAACGGG          | ge     | 1 |
| trf_1_1 | Bra013 | 22. |   |   |    |      |      | UCCGUUGUAGUCUAGC  | CAUCAUCAGCUUGGCU  | Cleava |   |
| 2       | 528    | 3   | 0 | 1 | 24 | 196  | 219  | UGGUUAGG          | AUAACGGG          | ge     | 1 |
| trf_1_4 | Bra013 | 22. |   |   |    |      |      | UCCGUUGUAGUCUAGC  | CAUCAUCAGCUUGGCU  | Cleava |   |
| 2       | 528    | 3   | 0 | 1 | 24 | 196  | 219  | UGGUCAGG          | AUAACGGG          | ge     | 1 |
| trf_1_8 | Bra013 | 22. |   |   |    |      |      | UCCGUUGUAGUCUAGC  | CAUCAUCAGCUUGGCU  | Cleava |   |
| 8       | 528    | 3   | 0 | 1 | 24 | 196  | 219  | UGGUCAGG          | AUAACGGG          | ge     | 1 |
| trf_1_1 | Bra013 | 22. |   |   |    |      |      | UCCGUUGUAGUCUAGC  | CAUCAUCAGCUUGGCU  | Cleava |   |
| 28      | 528    | 3   | 0 | 1 | 24 | 196  | 219  | UGGUCAGG          | AUAACGGG          | ge     | 1 |
| trf_1_1 | Bra013 | 22. |   |   |    |      |      | UCCGUUGUAGUCUAGC  | CAUCAUCAGCUUGGCU  | Cleava |   |
| 40      | 528    | 3   | 0 | 1 | 24 | 196  | 219  | UGGUCAGG          | AUAACGGG          | ge     | 1 |
| trf_1_1 | Bra013 | 22. |   |   |    |      |      | UCCGUUGUAGUCUAGC  | CAUCAUCAGCUUGGCU  | Cleava |   |
| 59      | 528    | 3   | 0 | 1 | 24 | 196  | 219  | UGGUCAGG          | AUAACGGG          | ge     | 1 |

|         |        |     |   |   |    |     |     |                   |                   |             |   |
|---------|--------|-----|---|---|----|-----|-----|-------------------|-------------------|-------------|---|
| trf_1_2 | Bra013 | 22. |   |   |    |     |     | UCCGUUGUAGUCUAGC  | CAUCAUCAGCUUGGCU  | Cleavage    |   |
| 63      | 528    | 3   | 0 | 1 | 24 | 196 | 219 | UGGUCAGG          | AUAACGGG          | ge          | 1 |
| trf_1_3 | Bra013 | 22. |   |   |    |     |     | UCCGUUGUAGUCUAGC  | CAUCAUCAGCUUGGCU  | Cleavage    |   |
| 26      | 528    | 3   | 0 | 1 | 24 | 196 | 219 | UGGUCAGG          | AUAACGGG          | ge          | 1 |
| trf_1_5 | Bra013 | 22. |   |   |    |     |     | UCCGUUGUAGUCUAGC  | CAUCAUCAGCUUGGCU  | Cleavage    |   |
| 70      | 528    | 3   | 0 | 1 | 24 | 196 | 219 | UGGUCAGG          | AUAACGGG          | ge          | 1 |
| trf_1_5 | Bra013 | 11. |   |   |    |     |     | GUCUGGGUGGUGUAGU  | AACCGACUCCACAAUUC | Translation |   |
| 4       | 558    | 3   | 8 | 1 | 21 | 165 | 185 | CGGUU             | AGAC              | ation       | 1 |
| trf_1_1 | Bra013 | 11. |   |   |    |     |     | GUCUGGGUGGUGUAGU  | AACCGACUCCACAAUUC | Translation |   |
| 88      | 558    | 3   | 8 | 1 | 21 | 165 | 185 | CGGUU             | AGAC              | ation       | 1 |
| trf_1_5 | Bra013 | 11. |   |   |    |     |     | GUCUGGGUGGUGUAGU  | AACCGACUCCACAAUUC | Translation |   |
| 28      | 558    | 3   | 8 | 1 | 21 | 165 | 185 | CGGUU             | AGAC              | ation       | 1 |
| trf_1_9 | Bra013 | 16. |   |   |    |     |     | UCCGUUGUCGUCCAGCG | AUGAUAACCGAUGGAU  | Cleavage    |   |
| 4       | 584    | 3   | 4 | 1 | 25 | 886 | 910 | GUUAGGAU          | GUCAAUGGA         | ge          | 1 |
| trf_1_9 | Bra013 | 16. |   |   |    |     |     | UCCGUUGUCGUCCAGCG | UAUGAUAACCGAUGGA  | Cleavage    |   |
| 5       | 584    | 3   | 4 | 1 | 26 | 885 | 910 | GUUAGGAUA         | UGUCAAUGGA        | ge          | 1 |
| trf_1_2 | Bra013 | 16. |   |   |    |     |     | UCCGUUGUCGUCCAGCG | AACCGAUGGAUGUCA   | Cleavage    |   |
| 59      | 584    | 3   | 4 | 1 | 20 | 891 | 910 | GUU               | UGGA              | ge          | 1 |
| trf_1_2 | Bra013 | 16. |   |   |    |     |     | UCCGUUGUCGUCCAGCG | UAUGAUAACCGAUGGA  | Cleavage    |   |
| 61      | 584    | 3   | 4 | 1 | 26 | 885 | 910 | GUUAGGAUA         | UGUCAAUGGA        | ge          | 1 |
| trf_1_2 | Bra013 | 16. |   |   |    |     |     | UCCGUUGUCGUCCAGCG | AUGAUAACCGAUGGAU  | Cleavage    |   |
| 87      | 584    | 3   | 4 | 1 | 25 | 886 | 910 | GUUAGGAU          | GUCAAUGGA         | ge          | 1 |
| trf_1_2 | Bra013 | 16. |   |   |    |     |     | UCCGUUGUCGUCCAGCG | UAUGAUAACCGAUGGA  | Cleavage    |   |
| 88      | 584    | 3   | 4 | 1 | 26 | 885 | 910 | GUUAGGAUA         | UGUCAAUGGA        | ge          | 1 |
| trf_1_5 | Bra013 | 16. |   |   |    |     |     | UCCGUUGUCGUCCAGCG | AUGAUAACCGAUGGAU  | Cleavage    |   |
| 10      | 584    | 3   | 4 | 1 | 25 | 886 | 910 | GUUAGGAU          | GUCAAUGGA         | ge          | 1 |
| trf_1_5 | Bra013 | 16. |   |   |    |     |     | UCCGUUGUCGUCCAGCG | UAUGAUAACCGAUGGA  | Cleavage    |   |
| 11      | 584    | 3   | 4 | 1 | 26 | 885 | 910 | GUUAGGAUA         | UGUCAAUGGA        | ge          | 1 |
| trf_1_5 | Bra013 | 16. |   |   |    |     |     | UCCGUUGUCGUCCAGCG | UAACCGAUGGAUGUCA  | Cleavage    |   |
| 12      | 584    | 3   | 4 | 1 | 21 | 890 | 910 | GUUA              | AUGGA             | ge          | 1 |
| trf_1_4 | Bra014 | 17. |   |   |    |     |     | UGGAUUGUAGUUCAAU  | AUCAAGUGAGUUACAA  | Cleavage    |   |
| 25      | 182    | 3   | 7 | 1 | 20 | 689 | 708 | UGGU              | UCUA              | ge          | 1 |
| trf_1_4 | Bra014 | 17. |   |   |    |     |     | UGGAUUGUAGUUCAAU  | AUCAAGUGAGUUACAA  | Cleavage    |   |
| 62      | 182    | 3   | 7 | 1 | 20 | 689 | 708 | UGGU              | UCUA              | ge          | 1 |

|         |        |     |   |   |    |      |      |                   |                  |        |   |
|---------|--------|-----|---|---|----|------|------|-------------------|------------------|--------|---|
| trf_1_4 | Bra014 | 17. |   |   |    |      |      | UGGAUUGUAGUUCAAU  | AUCAAGUGAGUUACAA | Cleava |   |
| 66      | 182    | 3   | 7 | 1 | 20 | 689  | 708  | UGGU              | UCUA             | ge     | 1 |
| trf_1_1 | Bra014 | 17. |   |   |    |      |      | GGGGAUGUAGCUCAUA  | AUUUAUUAGCUAUAU  | Cleava |   |
| 19      | 507    | 3   | 0 | 1 | 20 | 544  | 563  | UGGU              | CUCC             | ge     | 1 |
| trf_1_1 | Bra014 | 17. |   |   |    |      |      | GGGGAUGUAGCUCAUA  | UGUAUUUAUUAGCUA  | Cleava |   |
| 20      | 507    | 3   | 0 | 1 | 23 | 541  | 563  | UGGUAGA           | UAUCUCC          | ge     | 1 |
| trf_1_2 | Bra014 | 17. |   |   |    |      |      | GGGGAUGUAGCUCAUA  | UGUAUUUAUUAGCUA  | Cleava |   |
| 89      | 507    | 3   | 0 | 1 | 23 | 541  | 563  | UGGUAGA           | UAUCUCC          | ge     | 1 |
| trf_1_2 | Bra014 | 17. |   |   |    |      |      | GGGGAUGUAGCUCAUA  | AUUUAUUAGCUAUAU  | Cleava |   |
| 90      | 507    | 3   | 0 | 1 | 20 | 544  | 563  | UGGU              | CUCC             | ge     | 1 |
| trf_1_3 | Bra014 | 17. |   |   |    |      |      | GGGGAUGUAGCUCAUA  | AUUUAUUAGCUAUAU  | Cleava |   |
| 88      | 507    | 3   | 0 | 1 | 20 | 544  | 563  | UGGU              | CUCC             | ge     | 1 |
| trf_1_3 | Bra014 | 17. |   |   |    |      |      | GGGGAUGUAGCUCAUA  | UGUAUUUAUUAGCUA  | Cleava |   |
| 89      | 507    | 3   | 0 | 1 | 23 | 541  | 563  | UGGUAGA           | UAUCUCC          | ge     | 1 |
| trf_1_4 | Bra014 | 17. |   |   |    |      |      | GGGGAUGUAGCUCAUA  | UGUAUUUAUUAGCUA  | Cleava |   |
| 81      | 507    | 3   | 0 | 1 | 23 | 541  | 563  | UGGUAGA           | UAUCUCC          | ge     | 1 |
| trf_1_4 | Bra014 | 17. |   |   |    |      |      | GGGGAUGUAGCUCAUA  | UGUAUUUAUUAGCUA  | Cleava |   |
| 96      | 507    | 3   | 0 | 1 | 23 | 541  | 563  | UGGUAGA           | UAUCUCC          | ge     | 1 |
| trf_1_4 | Bra014 | 17. |   |   |    |      |      | GGGGAUGUAGCUCAUA  | AUUUAUUAGCUAUAU  | Cleava |   |
| 97      | 507    | 3   | 0 | 1 | 20 | 544  | 563  | UGGU              | CUCC             | ge     | 1 |
| trf_1_2 | Bra015 | 24. |   |   |    |      |      | AUCAGAGUGGCGCAGCG | CUCCGUUCCACUGCAC | Transl |   |
| 58      | 824    | 3   | 0 | 1 | 26 | 913  | 938  | GAAGCGUGG         | CACUCUGAC        | ation  | 1 |
| trf_1_5 | Bra015 | 24. |   |   |    |      |      | AUCAGAGUGGCGCAGCG | CUCCGUUCCACUGCAC | Transl |   |
| 69      | 824    | 3   | 0 | 1 | 26 | 913  | 938  | GAAGCGUGG         | CACUCUGAC        | ation  | 1 |
| trf_1_3 | Bra016 | 10. |   |   |    |      |      | GGGGAUGUAGCUCAGA  | UUAUCAUCUGAGCUUC | Cleava |   |
| 1       | 141    | 3   | 4 | 1 | 22 | 3031 | 3052 | UGGUAG            | GUUCUC           | ge     | 1 |
| trf_1_3 | Bra016 | 10. |   |   |    |      |      | GGGGAUGUAGCUCAGA  | AUCAUCUGAGCUUCGU | Cleava |   |
| 5       | 141    | 3   | 4 | 1 | 20 | 3033 | 3052 | UGGU              | UCUC             | ge     | 1 |
| trf_1_6 | Bra016 | 10. |   |   |    |      |      | GGGGAUGUAGCUCAGA  | UUAUCAUCUGAGCUUC | Cleava |   |
| 0       | 141    | 3   | 4 | 1 | 22 | 3031 | 3052 | UGGUAG            | GUUCUC           | ge     | 1 |
| trf_1_6 | Bra016 | 10. |   |   |    |      |      | GGGGAUGUAGCUCAGA  | CAUUAUCAUCUGAGCU | Cleava |   |
| 2       | 141    | 3   | 4 | 1 | 24 | 3029 | 3052 | UGGUAGAG          | UCGUUCUC         | ge     | 1 |
| trf_1_9 | Bra016 | 10. |   |   |    |      |      | GGGGAUGUAGCUCAGA  | UUAUCAUCUGAGCUUC | Cleava |   |
| 0       | 141    | 3   | 4 | 1 | 22 | 3031 | 3052 | UGGUAG            | GUUCUC           | ge     | 1 |



|         |        |     |   |   |    |      |      |                  |                  |        |   |
|---------|--------|-----|---|---|----|------|------|------------------|------------------|--------|---|
| trf_1_1 | Bra016 | 10. |   |   |    |      |      | GGGGAUGUAGCUCAGA | UUAUCAUCUGAGCUUC | Cleava |   |
| 33      | 141    | 3   | 4 | 1 | 22 | 3031 | 3052 | UGGUAG           | GUUCUC           | ge     | 1 |
| trf_1_1 | Bra016 | 10. |   |   |    |      |      | GGGGAUGUAGCUCAGA | AUCAUCUGAGCUUCGU | Cleava |   |
| 37      | 141    | 3   | 4 | 1 | 20 | 3033 | 3052 | UGGU             | UCUC             | ge     | 1 |
| trf_1_1 | Bra016 | 10. |   |   |    |      |      | GGGGAUGUAGCUCAGA | UAUCAUCUGAGCUUCG | Cleava |   |
| 38      | 141    | 3   | 4 | 1 | 21 | 3032 | 3052 | UGGUA            | UUCUC            | ge     | 1 |
| trf_1_1 | Bra016 | 10. |   |   |    |      |      | GGGGAUGUAGCUCAGA | UUAUCAUCUGAGCUUC | Cleava |   |
| 53      | 141    | 3   | 4 | 1 | 22 | 3031 | 3052 | UGGUAG           | GUUCUC           | ge     | 1 |
| trf_1_1 | Bra016 | 10. |   |   |    |      |      | GGGGAUGUAGCUCAGA | CAUUAUCAUCUGAGCU | Cleava |   |
| 54      | 141    | 3   | 4 | 1 | 24 | 3029 | 3052 | UGGUAGAG         | UCGUUCUC         | ge     | 1 |
| trf_1_1 | Bra016 | 10. |   |   |    |      |      | GGGGAUGUAGCUCAGA | UUAUCAUCUGAGCUUC | Cleava |   |
| 60      | 141    | 3   | 4 | 1 | 22 | 3031 | 3052 | UGGUAG           | GUUCUC           | ge     | 1 |
| trf_1_1 | Bra016 | 10. |   |   |    |      |      | GGGGAUGUAGCUCAGA | CAUUAUCAUCUGAGCU | Cleava |   |
| 62      | 141    | 3   | 4 | 1 | 24 | 3029 | 3052 | UGGUAGAG         | UCGUUCUC         | ge     | 1 |
| trf_1_1 | Bra016 | 10. |   |   |    |      |      | GGGGAUGUAGCUCAGA | UUAUCAUCUGAGCUUC | Cleava |   |
| 69      | 141    | 3   | 4 | 1 | 22 | 3031 | 3052 | UGGUAG           | GUUCUC           | ge     | 1 |
| trf_1_1 | Bra016 | 10. |   |   |    |      |      | GGGGAUGUAGCUCAGA | CAUUAUCAUCUGAGCU | Cleava |   |
| 73      | 141    | 3   | 4 | 1 | 24 | 3029 | 3052 | UGGUAGAG         | UCGUUCUC         | ge     | 1 |
| trf_1_1 | Bra016 | 10. |   |   |    |      |      | GGGGAUGUAGCUCAGA | UUAUCAUCUGAGCUUC | Cleava |   |
| 83      | 141    | 3   | 4 | 1 | 22 | 3031 | 3052 | UGGUAG           | GUUCUC           | ge     | 1 |
| trf_1_2 | Bra016 | 10. |   |   |    |      |      | GGGGAUGUAGCUCAGA | UUAUCAUCUGAGCUUC | Cleava |   |
| 33      | 141    | 3   | 4 | 1 | 22 | 3031 | 3052 | UGGUAG           | GUUCUC           | ge     | 1 |
| trf_1_2 | Bra016 | 10. |   |   |    |      |      | GGGGAUGUAGCUCAGA | CAUUAUCAUCUGAGCU | Cleava |   |
| 36      | 141    | 3   | 4 | 1 | 24 | 3029 | 3052 | UGGUAGAG         | UCGUUCUC         | ge     | 1 |
| trf_1_2 | Bra016 | 10. |   |   |    |      |      | GGGGAUGUAGCUCAGA | UUAUCAUCUGAGCUUC | Cleava |   |
| 44      | 141    | 3   | 4 | 1 | 22 | 3031 | 3052 | UGGUAG           | GUUCUC           | ge     | 1 |
| trf_1_2 | Bra016 | 10. |   |   |    |      |      | GGGGAUGUAGCUCAGA | CAUUAUCAUCUGAGCU | Cleava |   |
| 47      | 141    | 3   | 4 | 1 | 24 | 3029 | 3052 | UGGUAGAG         | UCGUUCUC         | ge     | 1 |
| trf_1_2 | Bra016 | 10. |   |   |    |      |      | GGGGAUGUAGCUCAGA | UUAUCAUCUGAGCUUC | Cleava |   |
| 66      | 141    | 3   | 4 | 1 | 22 | 3031 | 3052 | UGGUAG           | GUUCUC           | ge     | 1 |
| trf_1_2 | Bra016 | 10. |   |   |    |      |      | GGGGAUGUAGCUCAGA | UUAUCAUCUGAGCUUC | Cleava |   |
| 86      | 141    | 3   | 4 | 1 | 22 | 3031 | 3052 | UGGUAG           | GUUCUC           | ge     | 1 |
| trf_1_2 | Bra016 | 10. |   |   |    |      |      | GGGGAUGUAGCUCAGA | UUAUCAUCUGAGCUUC | Cleava |   |
| 93      | 141    | 3   | 4 | 1 | 22 | 3031 | 3052 | UGGUAG           | GUUCUC           | ge     | 1 |

|         |        |     |   |   |    |      |      |                  |                  |        |   |
|---------|--------|-----|---|---|----|------|------|------------------|------------------|--------|---|
| trf_1_2 | Bra016 | 10. |   |   |    |      |      | GGGGAUGUAGCUCAGA | CAUUAUCAUCUGAGCU | Cleava |   |
| 97      | 141    | 3   | 4 | 1 | 24 | 3029 | 3052 | UGGUAGAG         | UCGUUCUC         | ge     | 1 |
| trf_1_3 | Bra016 | 10. |   |   |    |      |      | GGGGAUGUAGCUCAGA | UUAUCAUCUGAGCUUC | Cleava |   |
| 02      | 141    | 3   | 4 | 1 | 22 | 3031 | 3052 | UGGUAG           | GUUCUC           | ge     | 1 |
| trf_1_3 | Bra016 | 10. |   |   |    |      |      | GGGGAUGUAGCUCAGA | UUAUCAUCUGAGCUUC | Cleava |   |
| 07      | 141    | 3   | 4 | 1 | 22 | 3031 | 3052 | UGGUAG           | GUUCUC           | ge     | 1 |
| trf_1_3 | Bra016 | 10. |   |   |    |      |      | GGGGAUGUAGCUCAGA | UUAUCAUCUGAGCUUC | Cleava |   |
| 14      | 141    | 3   | 4 | 1 | 22 | 3031 | 3052 | UGGUAG           | GUUCUC           | ge     | 1 |
| trf_1_3 | Bra016 | 10. |   |   |    |      |      | GGGGAUGUAGCUCAGA | UUAUCAUCUGAGCUUC | Cleava |   |
| 22      | 141    | 3   | 4 | 1 | 22 | 3031 | 3052 | UGGUAG           | GUUCUC           | ge     | 1 |
| trf_1_3 | Bra016 | 10. |   |   |    |      |      | GGGGAUGUAGCUCAGA | CAUUAUCAUCUGAGCU | Cleava |   |
| 23      | 141    | 3   | 4 | 1 | 24 | 3029 | 3052 | UGGUAGAG         | UCGUUCUC         | ge     | 1 |
| trf_1_3 | Bra016 | 10. |   |   |    |      |      | GGGGAUGUAGCUCAGA | UUAUCAUCUGAGCUUC | Cleava |   |
| 32      | 141    | 3   | 4 | 1 | 22 | 3031 | 3052 | UGGUAG           | GUUCUC           | ge     | 1 |
| trf_1_3 | Bra016 | 10. |   |   |    |      |      | GGGGAUGUAGCUCAGA | CAUUAUCAUCUGAGCU | Cleava |   |
| 38      | 141    | 3   | 4 | 1 | 24 | 3029 | 3052 | UGGUAGAG         | UCGUUCUC         | ge     | 1 |
| trf_1_3 | Bra016 | 10. |   |   |    |      |      | GGGGAUGUAGCUCAGA | UUAUCAUCUGAGCUUC | Cleava |   |
| 41      | 141    | 3   | 4 | 1 | 22 | 3031 | 3052 | UGGUAG           | GUUCUC           | ge     | 1 |
| trf_1_3 | Bra016 | 10. |   |   |    |      |      | GGGGAUGUAGCUCAGA | UUAUCAUCUGAGCUUC | Cleava |   |
| 51      | 141    | 3   | 4 | 1 | 22 | 3031 | 3052 | UGGUAG           | GUUCUC           | ge     | 1 |
| trf_1_3 | Bra016 | 10. |   |   |    |      |      | GGGGAUGUAGCUCAGA | AUCAUCUGAGCUUCGU | Cleava |   |
| 53      | 141    | 3   | 4 | 1 | 20 | 3033 | 3052 | UGGU             | UCUC             | ge     | 1 |
| trf_1_3 | Bra016 | 10. |   |   |    |      |      | GGGGAUGUAGCUCAGA | UUAUCAUCUGAGCUUC | Cleava |   |
| 62      | 141    | 3   | 4 | 1 | 22 | 3031 | 3052 | UGGUAG           | GUUCUC           | ge     | 1 |
| trf_1_3 | Bra016 | 10. |   |   |    |      |      | GGGGAUGUAGCUCAGA | CAUUAUCAUCUGAGCU | Cleava |   |
| 66      | 141    | 3   | 4 | 1 | 24 | 3029 | 3052 | UGGUAGAG         | UCGUUCUC         | ge     | 1 |
| trf_1_3 | Bra016 | 10. |   |   |    |      |      | GGGGAUGUAGCUCAGA | UUAUCAUCUGAGCUUC | Cleava |   |
| 75      | 141    | 3   | 4 | 1 | 22 | 3031 | 3052 | UGGUAG           | GUUCUC           | ge     | 1 |
| trf_1_3 | Bra016 | 10. |   |   |    |      |      | GGGGAUGUAGCUCAGA | CAUUAUCAUCUGAGCU | Cleava |   |
| 79      | 141    | 3   | 4 | 1 | 24 | 3029 | 3052 | UGGUAGAG         | UCGUUCUC         | ge     | 1 |
| trf_1_3 | Bra016 | 10. |   |   |    |      |      | GGGGAUGUAGCUCAGA | UUAUCAUCUGAGCUUC | Cleava |   |
| 82      | 141    | 3   | 4 | 1 | 22 | 3031 | 3052 | UGGUAG           | GUUCUC           | ge     | 1 |
| trf_1_3 | Bra016 | 10. |   |   |    |      |      | GGGGAUGUAGCUCAGA | CAUUAUCAUCUGAGCU | Cleava |   |
| 83      | 141    | 3   | 4 | 1 | 24 | 3029 | 3052 | UGGUAGAG         | UCGUUCUC         | ge     | 1 |

|         |        |     |     |   |    |      |      |                  |                   |        |   |
|---------|--------|-----|-----|---|----|------|------|------------------|-------------------|--------|---|
| trf_1_3 | Bra016 | 10. |     |   |    |      |      | GGGGAUGUAGCUCAGA | UUAUCAUCUGAGCUUC  | Cleava |   |
| 91      | 141    | 3   | 4   | 1 | 22 | 3031 | 3052 | UGGUAG           | GUUCUC            | ge     | 1 |
| trf_1_3 | Bra016 | 10. |     |   |    |      |      | GGGGAUGUAGCUCAGA | AUCAUCUGAGCUUCGU  | Cleava |   |
| 92      | 141    | 3   | 4   | 1 | 20 | 3033 | 3052 | UGGU             | UCUC              | ge     | 1 |
| trf_1_3 | Bra016 | 10. |     |   |    |      |      | GGGGAUGUAGCUCAGA | CAUUAUCAUCUGAGCU  | Cleava |   |
| 93      | 141    | 3   | 4   | 1 | 24 | 3029 | 3052 | UGGUAGAG         | UCGUUCUC          | ge     | 1 |
| trf_1_4 | Bra016 | 10. |     |   |    |      |      | GGGGAUGUAGCUCAGA | UUAUCAUCUGAGCUUC  | Cleava |   |
| 00      | 141    | 3   | 4   | 1 | 22 | 3031 | 3052 | UGGUAG           | GUUCUC            | ge     | 1 |
| trf_1_4 | Bra016 | 10. |     |   |    |      |      | GGGGAUGUAGCUCAGA | AUCAUCUGAGCUUCGU  | Cleava |   |
| 04      | 141    | 3   | 4   | 1 | 20 | 3033 | 3052 | UGGU             | UCUC              | ge     | 1 |
| trf_1_4 | Bra016 | 10. |     |   |    |      |      | GGGGAUGUAGCUCAGA | UUAUCAUCUGAGCUUC  | Cleava |   |
| 08      | 141    | 3   | 4   | 1 | 22 | 3031 | 3052 | UGGUAG           | GUUCUC            | ge     | 1 |
| trf_1_4 | Bra016 | 10. |     |   |    |      |      | GGGGAUGUAGCUCAGA | AUCAUCUGAGCUUCGU  | Cleava |   |
| 10      | 141    | 3   | 4   | 1 | 20 | 3033 | 3052 | UGGU             | UCUC              | ge     | 1 |
| trf_1_4 | Bra016 | 10. |     |   |    |      |      | GGGGAUGUAGCUCAGA | UUAUCAUCUGAGCUUC  | Cleava |   |
| 82      | 141    | 3   | 4   | 1 | 22 | 3031 | 3052 | UGGUAG           | GUUCUC            | ge     | 1 |
| trf_1_4 | Bra016 | 10. |     |   |    |      |      | GGGGAUGUAGCUCAGA | AUCAUCUGAGCUUCGU  | Cleava |   |
| 86      | 141    | 3   | 4   | 1 | 20 | 3033 | 3052 | UGGU             | UCUC              | ge     | 1 |
| trf_1_4 | Bra016 | 10. |     |   |    |      |      | GGGGAUGUAGCUCAGA | UUAUCAUCUGAGCUUC  | Cleava |   |
| 89      | 141    | 3   | 4   | 1 | 22 | 3031 | 3052 | UGGUAG           | GUUCUC            | ge     | 1 |
| trf_1_4 | Bra016 | 10. |     |   |    |      |      | GGGGAUGUAGCUCAGA | AUCAUCUGAGCUUCGU  | Cleava |   |
| 94      | 141    | 3   | 4   | 1 | 20 | 3033 | 3052 | UGGU             | UCUC              | ge     | 1 |
| trf_1_4 | Bra016 | 10. |     |   |    |      |      | GGGGAUGUAGCUCAGA | AUCAUCUGAGCUUCGU  | Cleava |   |
| 98      | 141    | 3   | 4   | 1 | 20 | 3033 | 3052 | UGGU             | UCUC              | ge     | 1 |
| trf_1_4 | Bra016 | 10. |     |   |    |      |      | GGGGAUGUAGCUCAGA | UUAUCAUCUGAGCUUC  | Cleava |   |
| 99      | 141    | 3   | 4   | 1 | 22 | 3031 | 3052 | UGGUAG           | GUUCUC            | ge     | 1 |
| trf_1_1 | Bra016 |     |     |   |    |      |      | GUCGUUGUAGUAUAGU | UACUAUUUAUACUACAA | Cleava |   |
| 4       | 584    | 3   | 9.9 | 1 | 20 | 1045 | 1064 | GGUA             | AGGC              | ge     | 1 |
| trf_1_2 | Bra016 |     |     |   |    |      |      | GUCGUUGUAGUAUAGU | UACUAUUUAUACUACAA | Cleava |   |
| 5       | 584    | 3   | 9.9 | 1 | 20 | 1045 | 1064 | GGUA             | AGGC              | ge     | 1 |
| trf_1_2 | Bra016 |     |     |   |    |      |      | GUCGUUGUAGUAUAGU | UACUAUUUAUACUACAA | Cleava |   |
| 6       | 584    | 3   | 9.9 | 1 | 20 | 1045 | 1064 | GGUA             | AGGC              | ge     | 1 |

|         |        |   |     |   |    |      |                  |                   |        |   |
|---------|--------|---|-----|---|----|------|------------------|-------------------|--------|---|
| trf_1_5 | Bra016 |   |     |   |    |      | GUCGUUGUAGUAUAGU | UACUAUUUAUACUACAA | Cleava |   |
| 0       | 584    | 3 | 9.9 | 1 | 20 | 1045 | GGUA             | AGGC              | ge     | 1 |
| trf_1_5 | Bra016 |   |     |   |    |      | GUCGUUGUAGUAUAGU | UACUAUUUAUACUACAA | Cleava |   |
| 1       | 584    | 3 | 9.9 | 1 | 20 | 1045 | GGUA             | AGGC              | ge     | 1 |
| trf_1_5 | Bra016 |   |     |   |    |      | GUCGUUGUAGUAUAGU | UACUAUUUAUACUACAA | Cleava |   |
| 2       | 584    | 3 | 9.9 | 1 | 20 | 1045 | GGUA             | AGGC              | ge     | 1 |
| trf_1_5 | Bra016 |   |     |   |    |      | GUCGUUGUAGUAUAGU | UACUAUUUAUACUACAA | Cleava |   |
| 3       | 584    | 3 | 9.9 | 1 | 20 | 1045 | GGUA             | AGGC              | ge     | 1 |
| trf_1_6 | Bra016 |   |     |   |    |      | GUCGUUGUAGUAUAGU | UACUAUUUAUACUACAA | Cleava |   |
| 5       | 584    | 3 | 9.9 | 1 | 20 | 1045 | GGUA             | AGGC              | ge     | 1 |
| trf_1_6 | Bra016 |   |     |   |    |      | GUCGUUGUAGUAUAGU | UACUAUUUAUACUACAA | Cleava |   |
| 6       | 584    | 3 | 9.9 | 1 | 20 | 1045 | GGUA             | AGGC              | ge     | 1 |
| trf_1_6 | Bra016 |   |     |   |    |      | GUCGUUGUAGUAUAGU | UACUAUUUAUACUACAA | Cleava |   |
| 7       | 584    | 3 | 9.9 | 1 | 20 | 1045 | GGUA             | AGGC              | ge     | 1 |
| trf_1_1 | Bra016 |   |     |   |    |      | GUCGUUGUAGUAUAGU | UACUAUUUAUACUACAA | Cleava |   |
| 25      | 584    | 3 | 9.9 | 1 | 20 | 1045 | GGUA             | AGGC              | ge     | 1 |
| trf_1_1 | Bra016 |   |     |   |    |      | GUCGUUGUAGUAUAGU | UACUAUUUAUACUACAA | Cleava |   |
| 31      | 584    | 3 | 9.9 | 1 | 20 | 1045 | GGUA             | AGGC              | ge     | 1 |
| trf_1_1 | Bra016 |   |     |   |    |      | GUCGUUGUAGUAUAGU | UACUAUUUAUACUACAA | Cleava |   |
| 32      | 584    | 3 | 9.9 | 1 | 20 | 1045 | GGUA             | AGGC              | ge     | 1 |
| trf_1_2 | Bra016 |   |     |   |    |      | GUCGUUGUAGUAUAGU | UACUAUUUAUACUACAA | Cleava |   |
| 30      | 584    | 3 | 9.9 | 1 | 20 | 1045 | GGUA             | AGGC              | ge     | 1 |
| trf_1_2 | Bra016 |   |     |   |    |      | GUCGUUGUAGUAUAGU | UACUAUUUAUACUACAA | Cleava |   |
| 57      | 584    | 3 | 9.9 | 1 | 20 | 1045 | GGUA             | AGGC              | ge     | 1 |
| trf_1_2 | Bra016 |   |     |   |    |      | GUCGUUGUAGUAUAGU | UACUAUUUAUACUACAA | Cleava |   |
| 81      | 584    | 3 | 9.9 | 1 | 20 | 1045 | GGUA             | AGGC              | ge     | 1 |
| trf_1_2 | Bra016 |   |     |   |    |      | GUCGUUGUAGUAUAGU | UACUAUUUAUACUACAA | Cleava |   |
| 82      | 584    | 3 | 9.9 | 1 | 20 | 1045 | GGUA             | AGGC              | ge     | 1 |
| trf_1_3 | Bra016 |   |     |   |    |      | GUCGUUGUAGUAUAGU | UACUAUUUAUACUACAA | Cleava |   |
| 06      | 584    | 3 | 9.9 | 1 | 20 | 1045 | GGUA             | AGGC              | ge     | 1 |
| trf_1_3 | Bra016 |   |     |   |    |      | GUCGUUGUAGUAUAGU | UACUAUUUAUACUACAA | Cleava |   |
| 31      | 584    | 3 | 9.9 | 1 | 20 | 1045 | GGUA             | AGGC              | ge     | 1 |
| trf_1_3 | Bra016 |   |     |   |    |      | GUCGUUGUAGUAUAGU | UACUAUUUAUACUACAA | Cleava |   |
| 72      | 584    | 3 | 9.9 | 1 | 20 | 1045 | GGUA             | AGGC              | ge     | 1 |

|         |        |   |     |   |    |      |      |                   |                   |        |   |
|---------|--------|---|-----|---|----|------|------|-------------------|-------------------|--------|---|
| trf_1_3 | Bra016 |   |     |   |    |      |      | GUCGUUGUAGUAUAGU  | UACUAUUUAUACUACAA | Cleava |   |
| 73      | 584    | 3 | 9.9 | 1 | 20 | 1045 | 1064 | GGUA              | AGGC              | ge     | 1 |
| trf_1_3 | Bra016 |   |     |   |    |      |      | GUCGUUGUAGUAUAGU  | UACUAUUUAUACUACAA | Cleava |   |
| 74      | 584    | 3 | 9.9 | 1 | 20 | 1045 | 1064 | GGUA              | AGGC              | ge     | 1 |
| trf_1_3 | Bra016 |   |     |   |    |      |      | GUCGUUGUAGUAUAGU  | UACUAUUUAUACUACAA | Cleava |   |
| 90      | 584    | 3 | 9.9 | 1 | 20 | 1045 | 1064 | GGUA              | AGGC              | ge     | 1 |
| trf_1_3 | Bra016 |   |     |   |    |      |      | GUCGUUGUAGUAUAGU  | UACUAUUUAUACUACAA | Cleava |   |
| 99      | 584    | 3 | 9.9 | 1 | 20 | 1045 | 1064 | GGUA              | AGGC              | ge     | 1 |
| trf_1_5 | Bra016 |   |     |   |    |      |      | GUCGUUGUAGUAUAGU  | UACUAUUUAUACUACAA | Cleava |   |
| 24      | 584    | 3 | 9.9 | 1 | 20 | 1045 | 1064 | GGUA              | AGGC              | ge     | 1 |
| trf_1_5 | Bra016 |   |     |   |    |      |      | GUCGUUGUAGUAUAGU  | UACUAUUUAUACUACAA | Cleava |   |
| 32      | 584    | 3 | 9.9 | 1 | 20 | 1045 | 1064 | GGUA              | AGGC              | ge     | 1 |
| trf_1_5 | Bra016 |   |     |   |    |      |      | GUCGUUGUAGUAUAGU  | UACUAUUUAUACUACAA | Cleava |   |
| 76      | 584    | 3 | 9.9 | 1 | 20 | 1045 | 1064 | GGUA              | AGGC              | ge     | 1 |
| trf_1_2 | Bra016 |   | 20. |   |    |      |      | UCCGUCGUAGUCUAGC  | CUGAAGAAGCUAGGCU  | Cleava |   |
| 1       | 601    | 3 | 8   | 1 | 24 | 415  | 438  | UGGUUAGG          | GCGACGGA          | ge     | 1 |
| trf_1_2 | Bra016 |   | 20. |   |    |      |      | UCCGUCGUAGUCUAGC  | CUGAAGAAGCUAGGCU  | Cleava |   |
| 2       | 601    | 3 | 8   | 1 | 24 | 415  | 438  | UGGUUAGG          | GCGACGGA          | ge     | 1 |
| trf_1_2 | Bra016 |   | 20. |   |    |      |      | UCCGUCGUAGUCUAGC  | CUGAAGAAGCUAGGCU  | Cleava |   |
| 91      | 601    | 3 | 8   | 1 | 24 | 415  | 438  | UGGUUAGG          | GCGACGGA          | ge     | 1 |
| trf_1_2 | Bra016 |   | 20. |   |    |      |      | UCCGUCGUAGUCUAGC  | CUGAAGAAGCUAGGCU  | Cleava |   |
| 92      | 601    | 3 | 8   | 1 | 24 | 415  | 438  | UGGUUAGG          | GCGACGGA          | ge     | 1 |
| trf_1_5 | Bra016 |   | 20. |   |    |      |      | UCCGUCGUAGUCUAGC  | CUGAAGAAGCUAGGCU  | Cleava |   |
| 16      | 601    | 3 | 8   | 1 | 24 | 415  | 438  | UGGUUAGG          | GCGACGGA          | ge     | 1 |
| trf_1_5 | Bra016 |   | 20. |   |    |      |      | UCCGUCGUAGUCUAGC  | CUGAAGAAGCUAGGCU  | Cleava |   |
| 21      | 601    | 3 | 8   | 1 | 24 | 415  | 438  | UGGUUAGG          | GCGACGGA          | ge     | 1 |
| trf_1_5 | Bra016 |   | 20. |   |    |      |      | UCCGUCGUAGUCUAGC  | CUGAAGAAGCUAGGCU  | Cleava |   |
| 22      | 601    | 3 | 8   | 1 | 24 | 415  | 438  | UGGUUAGG          | GCGACGGA          | ge     | 1 |
| trf_1_5 | Bra016 |   | 20. |   |    |      |      | UCCGUCGUAGUCUAGC  | AAGAAGCUAGGCUGCG  | Cleava |   |
| 23      | 601    | 3 | 8   | 1 | 21 | 418  | 438  | UGGUU             | ACGGA             | ge     | 1 |
| trf_1_1 | Bra018 |   |     |   |    |      |      | GACGGUUUUGGCCGAGU | CCCAAGACCACUCCUCG | Transl |   |
| 26      | 257    | 3 | 7.1 | 1 | 25 | 27   | 51   | GGUCUAAGG         | AAACCGUC          | ation  | 1 |
| trf_1_3 | Bra018 |   |     |   |    |      |      | GGGGAUGUAGCUCAGA  | GCCACCUCAGCUACAUC | Cleava |   |
| 1       | 620    | 3 | 8.3 | 1 | 20 | 7    | 26   | UGGU              | CUC               | ge     | 1 |

|         |        |   |     |   |    |   |                  |                   |        |   |
|---------|--------|---|-----|---|----|---|------------------|-------------------|--------|---|
| trf_1_3 | Bra018 |   |     |   |    |   | GGGGAUGUAGCUCAGA | GCCACCUCAGCUACAUC | Cleava |   |
| 5       | 620    | 3 | 8.3 | 1 | 20 | 7 | 26 UGGU          | CUC               | ge     | 1 |
| trf_1_6 | Bra018 |   |     |   |    |   | GGGGAUGUAGCUCAGA | GCCACCUCAGCUACAUC | Cleava |   |
| 0       | 620    | 3 | 8.3 | 1 | 20 | 7 | 26 UGGU          | CUC               | ge     | 1 |
| trf_1_6 | Bra018 |   |     |   |    |   | GGGGAUGUAGCUCAGA | GCCACCUCAGCUACAUC | Cleava |   |
| 2       | 620    | 3 | 8.3 | 1 | 20 | 7 | 26 UGGU          | CUC               | ge     | 1 |
| trf_1_9 | Bra018 |   |     |   |    |   | GGGGAUGUAGCUCAGA | GCCACCUCAGCUACAUC | Cleava |   |
| 0       | 620    | 3 | 8.3 | 1 | 20 | 7 | 26 UGGU          | CUC               | ge     | 1 |
| trf_1_1 | Bra018 |   |     |   |    |   | GGGGAUGUAGCUCAGA | GCCACCUCAGCUACAUC | Cleava |   |
| 33      | 620    | 3 | 8.3 | 1 | 20 | 7 | 26 UGGU          | CUC               | ge     | 1 |
| trf_1_1 | Bra018 |   |     |   |    |   | GGGGAUGUAGCUCAGA | GCCACCUCAGCUACAUC | Cleava |   |
| 37      | 620    | 3 | 8.3 | 1 | 20 | 7 | 26 UGGU          | CUC               | ge     | 1 |
| trf_1_1 | Bra018 |   |     |   |    |   | GGGGAUGUAGCUCAGA | GCCACCUCAGCUACAUC | Cleava |   |
| 38      | 620    | 3 | 8.3 | 1 | 20 | 7 | 26 UGGU          | CUC               | ge     | 1 |
| trf_1_1 | Bra018 |   |     |   |    |   | GGGGAUGUAGCUCAGA | GCCACCUCAGCUACAUC | Cleava |   |
| 53      | 620    | 3 | 8.3 | 1 | 20 | 7 | 26 UGGU          | CUC               | ge     | 1 |
| trf_1_1 | Bra018 |   |     |   |    |   | GGGGAUGUAGCUCAGA | GCCACCUCAGCUACAUC | Cleava |   |
| 54      | 620    | 3 | 8.3 | 1 | 20 | 7 | 26 UGGU          | CUC               | ge     | 1 |
| trf_1_1 | Bra018 |   |     |   |    |   | GGGGAUGUAGCUCAGA | GCCACCUCAGCUACAUC | Cleava |   |
| 60      | 620    | 3 | 8.3 | 1 | 20 | 7 | 26 UGGU          | CUC               | ge     | 1 |
| trf_1_1 | Bra018 |   |     |   |    |   | GGGGAUGUAGCUCAGA | GCCACCUCAGCUACAUC | Cleava |   |
| 62      | 620    | 3 | 8.3 | 1 | 20 | 7 | 26 UGGU          | CUC               | ge     | 1 |
| trf_1_1 | Bra018 |   |     |   |    |   | GGGGAUGUAGCUCAGA | GCCACCUCAGCUACAUC | Cleava |   |
| 69      | 620    | 3 | 8.3 | 1 | 20 | 7 | 26 UGGU          | CUC               | ge     | 1 |
| trf_1_1 | Bra018 |   |     |   |    |   | GGGGAUGUAGCUCAGA | GCCACCUCAGCUACAUC | Cleava |   |
| 73      | 620    | 3 | 8.3 | 1 | 20 | 7 | 26 UGGU          | CUC               | ge     | 1 |
| trf_1_1 | Bra018 |   |     |   |    |   | GGGGAUGUAGCUCAGA | GCCACCUCAGCUACAUC | Cleava |   |
| 83      | 620    | 3 | 8.3 | 1 | 20 | 7 | 26 UGGU          | CUC               | ge     | 1 |
| trf_1_2 | Bra018 |   |     |   |    |   | GGGGAUGUAGCUCAGA | GCCACCUCAGCUACAUC | Cleava |   |
| 33      | 620    | 3 | 8.3 | 1 | 20 | 7 | 26 UGGU          | CUC               | ge     | 1 |
| trf_1_2 | Bra018 |   |     |   |    |   | GGGGAUGUAGCUCAGA | GCCACCUCAGCUACAUC | Cleava |   |
| 36      | 620    | 3 | 8.3 | 1 | 20 | 7 | 26 UGGU          | CUC               | ge     | 1 |
| trf_1_2 | Bra018 |   |     |   |    |   | GGGGAUGUAGCUCAGA | GCCACCUCAGCUACAUC | Cleava |   |
| 44      | 620    | 3 | 8.3 | 1 | 20 | 7 | 26 UGGU          | CUC               | ge     | 1 |

|         |        |   |     |   |    |   |    |                  |                   |        |   |
|---------|--------|---|-----|---|----|---|----|------------------|-------------------|--------|---|
| trf_1_2 | Bra018 |   |     |   |    |   |    | GGGGAUGUAGCUCAGA | GCCACCUCAGCUACAUC | Cleava |   |
| 47      | 620    | 3 | 8.3 | 1 | 20 | 7 | 26 | UGGU             | CUC               | ge     | 1 |
| trf_1_2 | Bra018 |   |     |   |    |   |    | GGGGAUGUAGCUCAGA | GCCACCUCAGCUACAUC | Cleava |   |
| 66      | 620    | 3 | 8.3 | 1 | 20 | 7 | 26 | UGGU             | CUC               | ge     | 1 |
| trf_1_2 | Bra018 |   |     |   |    |   |    | GGGGAUGUAGCUCAGA | GCCACCUCAGCUACAUC | Cleava |   |
| 86      | 620    | 3 | 8.3 | 1 | 20 | 7 | 26 | UGGU             | CUC               | ge     | 1 |
| trf_1_2 | Bra018 |   |     |   |    |   |    | GGGGAUGUAGCUCAGA | GCCACCUCAGCUACAUC | Cleava |   |
| 93      | 620    | 3 | 8.3 | 1 | 20 | 7 | 26 | UGGU             | CUC               | ge     | 1 |
| trf_1_2 | Bra018 |   |     |   |    |   |    | GGGGAUGUAGCUCAGA | GCCACCUCAGCUACAUC | Cleava |   |
| 97      | 620    | 3 | 8.3 | 1 | 20 | 7 | 26 | UGGU             | CUC               | ge     | 1 |
| trf_1_3 | Bra018 |   |     |   |    |   |    | GGGGAUGUAGCUCAGA | GCCACCUCAGCUACAUC | Cleava |   |
| 02      | 620    | 3 | 8.3 | 1 | 20 | 7 | 26 | UGGU             | CUC               | ge     | 1 |
| trf_1_3 | Bra018 |   |     |   |    |   |    | GGGGAUGUAGCUCAGA | GCCACCUCAGCUACAUC | Cleava |   |
| 07      | 620    | 3 | 8.3 | 1 | 20 | 7 | 26 | UGGU             | CUC               | ge     | 1 |
| trf_1_3 | Bra018 |   |     |   |    |   |    | GGGGAUGUAGCUCAGA | GCCACCUCAGCUACAUC | Cleava |   |
| 14      | 620    | 3 | 8.3 | 1 | 20 | 7 | 26 | UGGU             | CUC               | ge     | 1 |
| trf_1_3 | Bra018 |   |     |   |    |   |    | GGGGAUGUAGCUCAGA | GCCACCUCAGCUACAUC | Cleava |   |
| 22      | 620    | 3 | 8.3 | 1 | 20 | 7 | 26 | UGGU             | CUC               | ge     | 1 |
| trf_1_3 | Bra018 |   |     |   |    |   |    | GGGGAUGUAGCUCAGA | GCCACCUCAGCUACAUC | Cleava |   |
| 23      | 620    | 3 | 8.3 | 1 | 20 | 7 | 26 | UGGU             | CUC               | ge     | 1 |
| trf_1_3 | Bra018 |   |     |   |    |   |    | GGGGAUGUAGCUCAGA | GCCACCUCAGCUACAUC | Cleava |   |
| 32      | 620    | 3 | 8.3 | 1 | 20 | 7 | 26 | UGGU             | CUC               | ge     | 1 |
| trf_1_3 | Bra018 |   |     |   |    |   |    | GGGGAUGUAGCUCAGA | GCCACCUCAGCUACAUC | Cleava |   |
| 38      | 620    | 3 | 8.3 | 1 | 20 | 7 | 26 | UGGU             | CUC               | ge     | 1 |
| trf_1_3 | Bra018 |   |     |   |    |   |    | GGGGAUGUAGCUCAGA | GCCACCUCAGCUACAUC | Cleava |   |
| 41      | 620    | 3 | 8.3 | 1 | 20 | 7 | 26 | UGGU             | CUC               | ge     | 1 |
| trf_1_3 | Bra018 |   |     |   |    |   |    | GGGGAUGUAGCUCAGA | GCCACCUCAGCUACAUC | Cleava |   |
| 51      | 620    | 3 | 8.3 | 1 | 20 | 7 | 26 | UGGU             | CUC               | ge     | 1 |
| trf_1_3 | Bra018 |   |     |   |    |   |    | GGGGAUGUAGCUCAGA | GCCACCUCAGCUACAUC | Cleava |   |
| 53      | 620    | 3 | 8.3 | 1 | 20 | 7 | 26 | UGGU             | CUC               | ge     | 1 |
| trf_1_3 | Bra018 |   |     |   |    |   |    | GGGGAUGUAGCUCAGA | GCCACCUCAGCUACAUC | Cleava |   |
| 62      | 620    | 3 | 8.3 | 1 | 20 | 7 | 26 | UGGU             | CUC               | ge     | 1 |
| trf_1_3 | Bra018 |   |     |   |    |   |    | GGGGAUGUAGCUCAGA | GCCACCUCAGCUACAUC | Cleava |   |
| 66      | 620    | 3 | 8.3 | 1 | 20 | 7 | 26 | UGGU             | CUC               | ge     | 1 |

|         |        |   |     |   |    |   |    |                  |                   |        |   |
|---------|--------|---|-----|---|----|---|----|------------------|-------------------|--------|---|
| trf_1_3 | Bra018 |   |     |   |    |   |    | GGGGAUGUAGCUCAGA | GCCACCUCAGCUACAUC | Cleava |   |
| 75      | 620    | 3 | 8.3 | 1 | 20 | 7 | 26 | UGGU             | CUC               | ge     | 1 |
| trf_1_3 | Bra018 |   |     |   |    |   |    | GGGGAUGUAGCUCAGA | GCCACCUCAGCUACAUC | Cleava |   |
| 79      | 620    | 3 | 8.3 | 1 | 20 | 7 | 26 | UGGU             | CUC               | ge     | 1 |
| trf_1_3 | Bra018 |   |     |   |    |   |    | GGGGAUGUAGCUCAGA | GCCACCUCAGCUACAUC | Cleava |   |
| 82      | 620    | 3 | 8.3 | 1 | 20 | 7 | 26 | UGGU             | CUC               | ge     | 1 |
| trf_1_3 | Bra018 |   |     |   |    |   |    | GGGGAUGUAGCUCAGA | GCCACCUCAGCUACAUC | Cleava |   |
| 83      | 620    | 3 | 8.3 | 1 | 20 | 7 | 26 | UGGU             | CUC               | ge     | 1 |
| trf_1_3 | Bra018 |   |     |   |    |   |    | GGGGAUGUAGCUCAGA | GCCACCUCAGCUACAUC | Cleava |   |
| 91      | 620    | 3 | 8.3 | 1 | 20 | 7 | 26 | UGGU             | CUC               | ge     | 1 |
| trf_1_3 | Bra018 |   |     |   |    |   |    | GGGGAUGUAGCUCAGA | GCCACCUCAGCUACAUC | Cleava |   |
| 92      | 620    | 3 | 8.3 | 1 | 20 | 7 | 26 | UGGU             | CUC               | ge     | 1 |
| trf_1_3 | Bra018 |   |     |   |    |   |    | GGGGAUGUAGCUCAGA | GCCACCUCAGCUACAUC | Cleava |   |
| 93      | 620    | 3 | 8.3 | 1 | 20 | 7 | 26 | UGGU             | CUC               | ge     | 1 |
| trf_1_4 | Bra018 |   |     |   |    |   |    | GGGGAUGUAGCUCAGA | GCCACCUCAGCUACAUC | Cleava |   |
| 00      | 620    | 3 | 8.3 | 1 | 20 | 7 | 26 | UGGU             | CUC               | ge     | 1 |
| trf_1_4 | Bra018 |   |     |   |    |   |    | GGGGAUGUAGCUCAGA | GCCACCUCAGCUACAUC | Cleava |   |
| 04      | 620    | 3 | 8.3 | 1 | 20 | 7 | 26 | UGGU             | CUC               | ge     | 1 |
| trf_1_4 | Bra018 |   |     |   |    |   |    | GGGGAUGUAGCUCAGA | GCCACCUCAGCUACAUC | Cleava |   |
| 08      | 620    | 3 | 8.3 | 1 | 20 | 7 | 26 | UGGU             | CUC               | ge     | 1 |
| trf_1_4 | Bra018 |   |     |   |    |   |    | GGGGAUGUAGCUCAGA | GCCACCUCAGCUACAUC | Cleava |   |
| 10      | 620    | 3 | 8.3 | 1 | 20 | 7 | 26 | UGGU             | CUC               | ge     | 1 |
| trf_1_4 | Bra018 |   |     |   |    |   |    | GGGGAUGUAGCUCAGA | GCCACCUCAGCUACAUC | Cleava |   |
| 82      | 620    | 3 | 8.3 | 1 | 20 | 7 | 26 | UGGU             | CUC               | ge     | 1 |
| trf_1_4 | Bra018 |   |     |   |    |   |    | GGGGAUGUAGCUCAGA | GCCACCUCAGCUACAUC | Cleava |   |
| 86      | 620    | 3 | 8.3 | 1 | 20 | 7 | 26 | UGGU             | CUC               | ge     | 1 |
| trf_1_4 | Bra018 |   |     |   |    |   |    | GGGGAUGUAGCUCAGA | GCCACCUCAGCUACAUC | Cleava |   |
| 89      | 620    | 3 | 8.3 | 1 | 20 | 7 | 26 | UGGU             | CUC               | ge     | 1 |
| trf_1_4 | Bra018 |   |     |   |    |   |    | GGGGAUGUAGCUCAGA | GCCACCUCAGCUACAUC | Cleava |   |
| 94      | 620    | 3 | 8.3 | 1 | 20 | 7 | 26 | UGGU             | CUC               | ge     | 1 |
| trf_1_4 | Bra018 |   |     |   |    |   |    | GGGGAUGUAGCUCAGA | GCCACCUCAGCUACAUC | Cleava |   |
| 98      | 620    | 3 | 8.3 | 1 | 20 | 7 | 26 | UGGU             | CUC               | ge     | 1 |
| trf_1_4 | Bra018 |   |     |   |    |   |    | GGGGAUGUAGCUCAGA | GCCACCUCAGCUACAUC | Cleava |   |
| 99      | 620    | 3 | 8.3 | 1 | 20 | 7 | 26 | UGGU             | CUC               | ge     | 1 |



|         |        |     |   |   |    |      |      |                   |                   |        |   |
|---------|--------|-----|---|---|----|------|------|-------------------|-------------------|--------|---|
| trf_1_1 | Bra018 | 15. |   |   |    |      |      | CCGACCUUAGCUCAGUU | CAACAAACUGGGUGAA  | Transl |   |
| 82      | 971    | 3   | 6 | 1 | 22 | 132  | 153  | GGUAG             | GGUCGG            | ation  | 1 |
| trf_1_4 | Bra018 | 15. |   |   |    |      |      | CCGACCUUAGCUCAGUU | CAACAAACUGGGUGAA  | Transl |   |
| 76      | 971    | 3   | 6 | 1 | 22 | 132  | 153  | GGUAG             | GGUCGG            | ation  | 1 |
| trf_1_4 | Bra018 | 15. |   |   |    |      |      | CCGACCUUAGCUCAGUU | CAACAAACUGGGUGAA  | Transl |   |
| 78      | 971    | 3   | 6 | 1 | 22 | 132  | 153  | GGUAG             | GGUCGG            | ation  | 1 |
| trf_1_4 | Bra018 | 15. |   |   |    |      |      | CCGACCUUAGCUCAGUU | CAACAAACUGGGUGAA  | Transl |   |
| 79      | 971    | 3   | 6 | 1 | 22 | 132  | 153  | GGUAG             | GGUCGG            | ation  | 1 |
| trf_1_5 | Bra018 | 15. |   |   |    |      |      | CCGACCUUAGCUCAGUU | CAACAAACUGGGUGAA  | Transl |   |
| 20      | 971    | 3   | 6 | 1 | 22 | 132  | 153  | GGUAG             | GGUCGG            | ation  | 1 |
| trf_1_5 | Bra019 | 16. |   |   |    |      |      | UUAGGUUCAAUCCUA   | CCA AUUGGAUUUGAUC | Cleava |   |
| 77      | 452    | 2.5 | 5 | 1 | 20 | 970  | 989  | UUGG              | CUAA              | ge     | 1 |
| trf_1_1 | Bra019 | 12. |   |   |    |      |      | GACGGUUUGGCCGAGU  | UGAGACUACUUGGUCC  | Cleava |   |
| 26      | 760    | 3   | 5 | 1 | 23 | 1328 | 1350 | GGUCUAA           | AGCCGUC           | ge     | 1 |
| trf_1_9 | Bra020 | 15. |   |   |    |      |      | UCCGUUGUCGUCCAGCG | CCAACUGCUGGAAGACA | Transl |   |
| 4       | 153    | 2.5 | 4 | 1 | 22 | 1953 | 1974 | GUUAG             | AUGGG             | ation  | 1 |
| trf_1_9 | Bra020 | 15. |   |   |    |      |      | UCCGUUGUCGUCCAGCG | CCAACUGCUGGAAGACA | Transl |   |
| 5       | 153    | 2.5 | 4 | 1 | 22 | 1953 | 1974 | GUUAG             | AUGGG             | ation  | 1 |
| trf_1_2 | Bra020 | 15. |   |   |    |      |      | UCCGUUGUCGUCCAGCG | AACUGCUGGAAGACAA  | Transl |   |
| 59      | 153    | 2.5 | 4 | 1 | 20 | 1955 | 1974 | GUU               | UGGG              | ation  | 1 |
| trf_1_2 | Bra020 | 15. |   |   |    |      |      | UCCGUUGUCGUCCAGCG | CCAACUGCUGGAAGACA | Transl |   |
| 61      | 153    | 2.5 | 4 | 1 | 22 | 1953 | 1974 | GUUAG             | AUGGG             | ation  | 1 |
| trf_1_2 | Bra020 | 15. |   |   |    |      |      | UCCGUUGUCGUCCAGCG | CCAACUGCUGGAAGACA | Transl |   |
| 87      | 153    | 2.5 | 4 | 1 | 22 | 1953 | 1974 | GUUAG             | AUGGG             | ation  | 1 |
| trf_1_2 | Bra020 | 15. |   |   |    |      |      | UCCGUUGUCGUCCAGCG | CCAACUGCUGGAAGACA | Transl |   |
| 88      | 153    | 2.5 | 4 | 1 | 22 | 1953 | 1974 | GUUAG             | AUGGG             | ation  | 1 |
| trf_1_5 | Bra020 | 15. |   |   |    |      |      | UCCGUUGUCGUCCAGCG | CCAACUGCUGGAAGACA | Transl |   |
| 10      | 153    | 2.5 | 4 | 1 | 22 | 1953 | 1974 | GUUAG             | AUGGG             | ation  | 1 |
| trf_1_5 | Bra020 | 15. |   |   |    |      |      | UCCGUUGUCGUCCAGCG | CCAACUGCUGGAAGACA | Transl |   |
| 11      | 153    | 2.5 | 4 | 1 | 22 | 1953 | 1974 | GUUAG             | AUGGG             | ation  | 1 |
| trf_1_5 | Bra020 | 15. |   |   |    |      |      | UCCGUUGUCGUCCAGCG | CCAACUGCUGGAAGACA | Transl |   |
| 12      | 153    | 2.5 | 4 | 1 | 22 | 1953 | 1974 | GUUAG             | AUGGG             | ation  | 1 |
|         | Bra020 | 12. |   |   |    |      |      | GGGGAUGUAGCUCAA   | GCCAUUGGAGCUAUAU  | Cleava |   |
| trf_1_5 | 755    | 3   | 6 | 1 | 20 | 454  | 473  | UGGU              | UCUC              | ge     | 1 |

|         |        |       |   |    |      |      |                  |                   |             |   |
|---------|--------|-------|---|----|------|------|------------------|-------------------|-------------|---|
| trf_1_1 | Bra020 | 12.   |   |    |      |      | GGGGAUGUAGCUCAAA | GCCAUUGGAGCUAUAU  | Cleavage    |   |
| 9       | 755    | 3 6   | 1 | 20 | 454  | 473  | UGGU             | UCUC              | ge          | 1 |
| trf_1_3 | Bra020 | 12.   |   |    |      |      | GGGGAUGUAGCUCAAA | GCCAUUGGAGCUAUAU  | Cleavage    |   |
| 0       | 755    | 3 6   | 1 | 20 | 454  | 473  | UGGU             | UCUC              | ge          | 1 |
| trf_1_7 | Bra020 | 12.   |   |    |      |      | GGGGAUGUAGCUCAAA | GCCAUUGGAGCUAUAU  | Cleavage    |   |
| 3       | 755    | 3 6   | 1 | 20 | 454  | 473  | UGGU             | UCUC              | ge          | 1 |
| trf_1_1 | Bra020 | 12.   |   |    |      |      | GGGGAUGUAGCUCAAA | GCCAUUGGAGCUAUAU  | Cleavage    |   |
| 16      | 755    | 3 6   | 1 | 20 | 454  | 473  | UGGU             | UCUC              | ge          | 1 |
| trf_1_1 | Bra020 | 12.   |   |    |      |      | GGGGAUGUAGCUCAAA | GCCAUUGGAGCUAUAU  | Cleavage    |   |
| 22      | 755    | 3 6   | 1 | 20 | 454  | 473  | UGGU             | UCUC              | ge          | 1 |
| trf_1_1 | Bra020 | 12.   |   |    |      |      | GGGGAUGUAGCUCAAA | GCCAUUGGAGCUAUAU  | Cleavage    |   |
| 30      | 755    | 3 6   | 1 | 20 | 454  | 473  | UGGU             | UCUC              | ge          | 1 |
| trf_1_3 | Bra020 | 12.   |   |    |      |      | GGGGAUGUAGCUCAAA | GCCAUUGGAGCUAUAU  | Cleavage    |   |
| 36      | 755    | 3 6   | 1 | 20 | 454  | 473  | UGGU             | UCUC              | ge          | 1 |
| trf_1_5 | Bra020 | 12.   |   |    |      |      | GGGGAUGUAGCUCAAA | GCCAUUGGAGCUAUAU  | Cleavage    |   |
| 19      | 755    | 3 6   | 1 | 20 | 454  | 473  | UGGU             | UCUC              | ge          | 1 |
| trf_1_5 | Bra020 | 12.   |   |    |      |      | GGGGAUGUAGCUCAAA | GCCAUUGGAGCUAUAU  | Cleavage    |   |
| 68      | 755    | 3 6   | 1 | 20 | 454  | 473  | UGGU             | UCUC              | ge          | 1 |
| trf_1_1 | Bra020 |       |   |    |      |      | GGGGGUGUAGCUCAUA | UUUUUACAUCAGCUAC  | Cleavage    |   |
| 7       | 835    | 3 9.5 | 1 | 22 | 5316 | 5337 | UGGUAG           | ACCCCC            | ge          | 1 |
| trf_1_1 | Bra020 |       |   |    |      |      | GGGGGUGUAGCUCAUA | UUUUUACAUCAGCUAC  | Cleavage    |   |
| 8       | 835    | 3 9.5 | 1 | 22 | 5316 | 5337 | UGGUAG           | ACCCCC            | ge          | 1 |
| trf_1_4 | Bra020 |       |   |    |      |      | GGGGGUGUAGCUCAUA | UUUUUACAUCAGCUAC  | Cleavage    |   |
| 3       | 835    | 3 9.5 | 1 | 22 | 5316 | 5337 | UGGUAG           | ACCCCC            | ge          | 1 |
| trf_1_2 | Bra020 |       |   |    |      |      | GGGGGUGUAGCUCAUA | UUUUUACAUCAGCUAC  | Cleavage    |   |
| 64      | 835    | 3 9.5 | 1 | 22 | 5316 | 5337 | UGGUAG           | ACCCCC            | ge          | 1 |
| trf_1_3 | Bra020 |       |   |    |      |      | GGGGGUGUAGCUCAUA | UUUUUACAUCAGCUAC  | Cleavage    |   |
| 98      | 835    | 3 9.5 | 1 | 22 | 5316 | 5337 | UGGUAG           | ACCCCC            | ge          | 1 |
| trf_1_5 | Bra020 | 12.   |   |    |      |      | AGGUUCAAUCCUAUU  | GUCCGAGAGGCUUUGG  | Translation |   |
| 78      | 978    | 3 8   | 1 | 20 | 173  | 192  | GGAC             | ACCU              | ation       | 1 |
| trf_1_4 | Bra021 | 23.   |   |    |      |      | GGGAUUGUAGUUCAAU | ACCAACUGAACUGCAAU | Cleavage    |   |
| 14      | 314    | 3 2   | 1 | 20 | 234  | 253  | UGGU             | CUG               | ge          | 1 |
| trf_1_4 | Bra021 | 23.   |   |    |      |      | GGGAUUGUAGUUCAAU | ACCAACUGAACUGCAAU | Cleavage    |   |
| 15      | 314    | 3 2   | 1 | 20 | 234  | 253  | UGGU             | CUG               | ge          | 1 |

|         |        |     |   |   |    |     |     |                  |                   |        |   |
|---------|--------|-----|---|---|----|-----|-----|------------------|-------------------|--------|---|
| trf_1_4 | Bra021 | 23. |   |   |    |     |     | GGGAUUGUAGUUCAAU | ACCAACUGAACUGCAAU | Cleava |   |
| 16      | 314    | 3   | 2 | 1 | 20 | 234 | 253 | UGGU             | CUG               | ge     | 1 |
| trf_1_4 | Bra021 | 23. |   |   |    |     |     | NGGAUUGUAGUUCAAU | ACCAACUGAACUGCAAU | Cleava |   |
| 21      | 314    | 3   | 2 | 1 | 20 | 234 | 253 | UGGU             | CUG               | ge     | 1 |
| trf_1_4 | Bra021 | 23. |   |   |    |     |     | GGGAUUGUAGUUCAAU | ACCAACUGAACUGCAAU | Cleava |   |
| 22      | 314    | 3   | 2 | 1 | 20 | 234 | 253 | UGGU             | CUG               | ge     | 1 |
| trf_1_4 | Bra021 | 23. |   |   |    |     |     | GGGAUUGUAGUUCAAU | ACCAACUGAACUGCAAU | Cleava |   |
| 23      | 314    | 3   | 2 | 1 | 20 | 234 | 253 | UGGU             | CUG               | ge     | 1 |
| trf_1_4 | Bra021 | 23. |   |   |    |     |     | GGGAUUGUAGUUCAAU | ACCAACUGAACUGCAAU | Cleava |   |
| 24      | 314    | 3   | 2 | 1 | 20 | 234 | 253 | UGGU             | CUG               | ge     | 1 |
| trf_1_4 | Bra021 | 23. |   |   |    |     |     | UGGAUUGUAGUUCAAU | ACCAACUGAACUGCAAU | Cleava |   |
| 25      | 314    | 2.5 | 2 | 1 | 20 | 234 | 253 | UGGU             | CUG               | ge     | 1 |
| trf_1_4 | Bra021 | 23. |   |   |    |     |     | GGGAUUGUAGUUCAAU | ACCAACUGAACUGCAAU | Cleava |   |
| 26      | 314    | 3   | 2 | 1 | 20 | 234 | 253 | UGGU             | CUG               | ge     | 1 |
| trf_1_4 | Bra021 | 23. |   |   |    |     |     | GGGAUUGUAGUUCAAU | ACCAACUGAACUGCAAU | Cleava |   |
| 29      | 314    | 3   | 2 | 1 | 20 | 234 | 253 | UGGU             | CUG               | ge     | 1 |
| trf_1_4 | Bra021 | 23. |   |   |    |     |     | GGGAUUGUAGUUCAAU | ACCAACUGAACUGCAAU | Cleava |   |
| 31      | 314    | 3   | 2 | 1 | 20 | 234 | 253 | UGGU             | CUG               | ge     | 1 |
| trf_1_4 | Bra021 | 23. |   |   |    |     |     | NGGAUUGUAGUUCAAU | ACCAACUGAACUGCAAU | Cleava |   |
| 35      | 314    | 3   | 2 | 1 | 20 | 234 | 253 | UGGU             | CUG               | ge     | 1 |
| trf_1_4 | Bra021 | 23. |   |   |    |     |     | GGGAUUGUAGUUCAAU | ACCAACUGAACUGCAAU | Cleava |   |
| 38      | 314    | 3   | 2 | 1 | 20 | 234 | 253 | UGGU             | CUG               | ge     | 1 |
| trf_1_4 | Bra021 | 23. |   |   |    |     |     | GGGAUUGUAGUUCAAU | ACCAACUGAACUGCAAU | Cleava |   |
| 39      | 314    | 3   | 2 | 1 | 20 | 234 | 253 | UGGU             | CUG               | ge     | 1 |
| trf_1_4 | Bra021 | 23. |   |   |    |     |     | GGGAUUGUAGUUCAAU | ACCAACUGAACUGCAAU | Cleava |   |
| 40      | 314    | 3   | 2 | 1 | 20 | 234 | 253 | UGGU             | CUG               | ge     | 1 |
| trf_1_4 | Bra021 | 23. |   |   |    |     |     | GGGAUUGUAGUUCAAU | ACCAACUGAACUGCAAU | Cleava |   |
| 43      | 314    | 3   | 2 | 1 | 20 | 234 | 253 | UGGU             | CUG               | ge     | 1 |
| trf_1_4 | Bra021 | 23. |   |   |    |     |     | GGGAUUGUAGUUCAAU | ACCAACUGAACUGCAAU | Cleava |   |
| 44      | 314    | 3   | 2 | 1 | 20 | 234 | 253 | UGGU             | CUG               | ge     | 1 |
| trf_1_4 | Bra021 | 23. |   |   |    |     |     | GGGAUUGUAGUUCAAU | ACCAACUGAACUGCAAU | Cleava |   |
| 49      | 314    | 3   | 2 | 1 | 20 | 234 | 253 | UGGU             | CUG               | ge     | 1 |
| trf_1_4 | Bra021 | 23. |   |   |    |     |     | GGGAUUGUAGUUCAAU | ACCAACUGAACUGCAAU | Cleava |   |
| 50      | 314    | 3   | 2 | 1 | 20 | 234 | 253 | UGGU             | CUG               | ge     | 1 |

|         |        |     |   |   |    |      |      |                   |                    |        |   |
|---------|--------|-----|---|---|----|------|------|-------------------|--------------------|--------|---|
| trf_1_4 | Bra021 | 23. |   |   |    |      |      | GGGAUUGUAGUUCAAU  | ACCAACUGAACUGCAAU  | Cleava |   |
| 51      | 314    | 3   | 2 | 1 | 20 | 234  | 253  | UGGU              | CUG                | ge     | 1 |
| trf_1_4 | Bra021 | 23. |   |   |    |      |      | GGGAUUGUAGUUCAAU  | ACCAACUGAACUGCAAU  | Cleava |   |
| 53      | 314    | 3   | 2 | 1 | 20 | 234  | 253  | UGGU              | CUG                | ge     | 1 |
| trf_1_4 | Bra021 | 23. |   |   |    |      |      | GGGAUUGUAGUUCAAU  | ACCAACUGAACUGCAAU  | Cleava |   |
| 55      | 314    | 3   | 2 | 1 | 20 | 234  | 253  | UGGU              | CUG                | ge     | 1 |
| trf_1_4 | Bra021 | 23. |   |   |    |      |      | GGGAUUGUAGUUCAAU  | ACCAACUGAACUGCAAU  | Cleava |   |
| 57      | 314    | 3   | 2 | 1 | 20 | 234  | 253  | UGGU              | CUG                | ge     | 1 |
| trf_1_4 | Bra021 | 23. |   |   |    |      |      | GGGAUUGUAGUUCAAU  | ACACCAACUGAACUGCA  | Cleava |   |
| 58      | 314    | 3   | 2 | 1 | 22 | 232  | 253  | UGGUCU            | AUCUG              | ge     | 1 |
| trf_1_4 | Bra021 | 23. |   |   |    |      |      | NGGAUUGUAGUUCAAU  | ACCAACUGAACUGCAAU  | Cleava |   |
| 61      | 314    | 3   | 2 | 1 | 20 | 234  | 253  | UGGU              | CUG                | ge     | 1 |
| trf_1_4 | Bra021 | 23. |   |   |    |      |      | UGGAUUGUAGUUCAAU  | ACCAACUGAACUGCAAU  | Cleava |   |
| 62      | 314    | 2.5 | 2 | 1 | 20 | 234  | 253  | UGGU              | CUG                | ge     | 1 |
| trf_1_4 | Bra021 | 23. |   |   |    |      |      | GGGAUUGUAGUUCAAU  | ACCAACUGAACUGCAAU  | Cleava |   |
| 63      | 314    | 3   | 2 | 1 | 20 | 234  | 253  | UGGU              | CUG                | ge     | 1 |
| trf_1_4 | Bra021 | 23. |   |   |    |      |      | UGGAUUGUAGUUCAAU  | ACCAACUGAACUGCAAU  | Cleava |   |
| 66      | 314    | 2.5 | 2 | 1 | 20 | 234  | 253  | UGGU              | CUG                | ge     | 1 |
| trf_1_4 | Bra021 | 23. |   |   |    |      |      | GGGAUUGUAGUUCAAU  | ACCAACUGAACUGCAAU  | Cleava |   |
| 67      | 314    | 3   | 2 | 1 | 20 | 234  | 253  | UGGU              | CUG                | ge     | 1 |
| trf_1_4 | Bra021 | 23. |   |   |    |      |      | GGGAUUGUAGUUCAAU  | GCUCAACACCAACUGAA  | Cleava |   |
| 68      | 314    | 3   | 2 | 1 | 26 | 227  | 253  | UGGU-UAGAGC       | CUGCAAUCUG         | ge     | 1 |
| trf_1_4 | Bra021 | 23. |   |   |    |      |      | GGGAUUGUAGUUCAAU  | ACCAACUGAACUGCAAU  | Cleava |   |
| 71      | 314    | 3   | 2 | 1 | 20 | 234  | 253  | UGGU              | CUG                | ge     | 1 |
| trf_1_5 | Bra021 | 14. |   |   |    |      |      | UUAGGUUCAAUCCUA   | UGCAAUAGGAUUUAGA   | Cleava |   |
| 77      | 441    | 3   | 8 | 1 | 21 | 759  | 779  | UUGGA             | CCUAG              | ge     | 1 |
| trf_1_5 | Bra021 | 14. |   |   |    |      |      | UAGGUUCAAUCCUAU   | UGCAAUAGGAUUUAGA   | Cleava |   |
| 79      | 441    | 3   | 7 | 1 | 20 | 759  | 778  | UGGA              | CCUA               | ge     | 1 |
| trf_1_1 | Bra021 | 19. |   |   |    |      |      | ACCUACUUAACUCAGUG | CUAACCAUGGCGUUAA   | Cleava |   |
| 05      | 555    | 3   | 4 | 1 | 22 | 946  | 967  | GUUAG             | GUGGGU             | ge     | 1 |
| trf_1_5 | Bra022 | 23. |   |   |    |      |      | GCUGGAGUAGCUCAGU  | AUCAAUUGGGAUACUC   | Transl |   |
| 29      | 251    | 3   | 9 | 1 | 20 | 3475 | 3494 | UGGU              | UAGC               | ation  | 1 |
| trf_1_3 | Bra023 | 19. |   |   |    |      |      | GGGGAUUAUAGCUCAGU | ACCACCGGACCUAUUAUC | Transl |   |
| 2       | 165    | 3   | 6 | 1 | 20 | 229  | 248  | UGGU              | CCC                | ation  | 1 |

|         |        |     |   |   |    |     |                   |                   |        |   |
|---------|--------|-----|---|---|----|-----|-------------------|-------------------|--------|---|
| trf_1_3 | Bra023 | 19. |   |   |    |     | GGGGAUUAUAGCUCAGU | ACCACCGGACCUAUAUC | Transl |   |
| 3       | 165    | 3   | 6 | 1 | 20 | 229 | 248 UGGU          | CCC               | ation  | 1 |
| trf_1_3 | Bra023 | 19. |   |   |    |     | GGGGAUUAUAGCUCAGU | ACCACCGGACCUAUAUC | Transl |   |
| 4       | 165    | 3   | 6 | 1 | 20 | 229 | 248 UGGU          | CCC               | ation  | 1 |
| trf_1_3 | Bra023 | 19. |   |   |    |     | GGGGAUUAUAGCUCAGU | ACCACCGGACCUAUAUC | Transl |   |
| 6       | 165    | 3   | 6 | 1 | 20 | 229 | 248 UGGU          | CCC               | ation  | 1 |
| trf_1_5 | Bra023 | 19. |   |   |    |     | GGGGAUUAUAGCUCAGU | ACCACCGGACCUAUAUC | Transl |   |
| 9       | 165    | 3   | 6 | 1 | 20 | 229 | 248 UGGU          | CCC               | ation  | 1 |
| trf_1_6 | Bra023 | 19. |   |   |    |     | GGGGAUUAUAGCUCAGU | ACCACCGGACCUAUAUC | Transl |   |
| 1       | 165    | 3   | 6 | 1 | 20 | 229 | 248 UGGU          | CCC               | ation  | 1 |
| trf_1_6 | Bra023 | 19. |   |   |    |     | GGGGAUUAUAGCUCAGU | ACCACCGGACCUAUAUC | Transl |   |
| 3       | 165    | 3   | 6 | 1 | 20 | 229 | 248 UGGU          | CCC               | ation  | 1 |
| trf_1_6 | Bra023 | 19. |   |   |    |     | GGGGAUUAUAGCUCAGU | ACCACCGGACCUAUAUC | Transl |   |
| 4       | 165    | 3   | 6 | 1 | 20 | 229 | 248 UGGU          | CCC               | ation  | 1 |
| trf_1_8 | Bra023 | 19. |   |   |    |     | GGGGAUUAUAGCUCAGU | ACCACCGGACCUAUAUC | Transl |   |
| 9       | 165    | 3   | 6 | 1 | 20 | 229 | 248 UGGU          | CCC               | ation  | 1 |
| trf_1_9 | Bra023 | 19. |   |   |    |     | GGGGAUUAUAGCUCAGU | ACCACCGGACCUAUAUC | Transl |   |
| 1       | 165    | 3   | 6 | 1 | 20 | 229 | 248 UGGU          | CCC               | ation  | 1 |
| trf_1_9 | Bra023 | 19. |   |   |    |     | GGGGAUUAUAGCUCAGU | ACCACCGGACCUAUAUC | Transl |   |
| 2       | 165    | 3   | 6 | 1 | 20 | 229 | 248 UGGU          | CCC               | ation  | 1 |
| trf_1_9 | Bra023 | 19. |   |   |    |     | GGGGAUUAUAGCUCAGU | ACCACCGGACCUAUAUC | Transl |   |
| 3       | 165    | 3   | 6 | 1 | 20 | 229 | 248 UGGU          | CCC               | ation  | 1 |
| trf_1_1 | Bra023 | 19. |   |   |    |     | GGGGAUUAUAGCUCAGU | ACCACCGGACCUAUAUC | Transl |   |
| 34      | 165    | 3   | 6 | 1 | 20 | 229 | 248 UGGU          | CCC               | ation  | 1 |
| trf_1_1 | Bra023 | 19. |   |   |    |     | GGGGAUUAUAGCUCAGU | ACCACCGGACCUAUAUC | Transl |   |
| 35      | 165    | 3   | 6 | 1 | 20 | 229 | 248 UGGU          | CCC               | ation  | 1 |
| trf_1_1 | Bra023 | 19. |   |   |    |     | GGGGAUUAUAGCUCAGU | ACCACCGGACCUAUAUC | Transl |   |
| 36      | 165    | 3   | 6 | 1 | 20 | 229 | 248 UGGU          | CCC               | ation  | 1 |
| trf_1_1 | Bra023 | 19. |   |   |    |     | GGGGAUUAUAGCUCAGU | ACCACCGGACCUAUAUC | Transl |   |
| 39      | 165    | 3   | 6 | 1 | 20 | 229 | 248 UGGU          | CCC               | ation  | 1 |
| trf_1_1 | Bra023 | 19. |   |   |    |     | GGGGAUUAUAGCUCAGU | ACCACCGGACCUAUAUC | Transl |   |
| 51      | 165    | 3   | 6 | 1 | 20 | 229 | 248 UGGU          | CCC               | ation  | 1 |
| trf_1_1 | Bra023 | 19. |   |   |    |     | GGGGAUUAUAGCUCAGU | ACCACCGGACCUAUAUC | Transl |   |
| 52      | 165    | 3   | 6 | 1 | 20 | 229 | 248 UGGU          | CCC               | ation  | 1 |

|         |        |     |   |   |    |     |     |                   |                   |        |   |
|---------|--------|-----|---|---|----|-----|-----|-------------------|-------------------|--------|---|
| trf_1_1 | Bra023 | 19. |   |   |    |     |     | GGGGAUUAUAGCUCAGU | ACCACCGGACCUAUAUC | Transl |   |
| 55      | 165    | 3   | 6 | 1 | 20 | 229 | 248 | UGGU              | CCC               | ation  | 1 |
| trf_1_1 | Bra023 | 19. |   |   |    |     |     | GGGGAUUAUAGCUCAGU | ACCACCGGACCUAUAUC | Transl |   |
| 56      | 165    | 3   | 6 | 1 | 20 | 229 | 248 | UGGU              | CCC               | ation  | 1 |
| trf_1_1 | Bra023 | 19. |   |   |    |     |     | GGGGAUUAUAGCUCAGU | ACCACCGGACCUAUAUC | Transl |   |
| 61      | 165    | 3   | 6 | 1 | 20 | 229 | 248 | UGGU              | CCC               | ation  | 1 |
| trf_1_1 | Bra023 | 19. |   |   |    |     |     | GGGGAUUAUAGCUCAGU | ACCACCGGACCUAUAUC | Transl |   |
| 63      | 165    | 3   | 6 | 1 | 20 | 229 | 248 | UGGU              | CCC               | ation  | 1 |
| trf_1_1 | Bra023 | 19. |   |   |    |     |     | GGGGAUUAUAGCUCAGU | ACCACCGGACCUAUAUC | Transl |   |
| 64      | 165    | 3   | 6 | 1 | 20 | 229 | 248 | UGGU              | CCC               | ation  | 1 |
| trf_1_1 | Bra023 | 19. |   |   |    |     |     | GGGGAUUAUAGCUCAGU | ACCACCGGACCUAUAUC | Transl |   |
| 65      | 165    | 3   | 6 | 1 | 20 | 229 | 248 | UGGU              | CCC               | ation  | 1 |
| trf_1_1 | Bra023 | 19. |   |   |    |     |     | GGGGAUUAUAGCUCAGU | ACCACCGGACCUAUAUC | Transl |   |
| 66      | 165    | 3   | 6 | 1 | 20 | 229 | 248 | UGGU              | CCC               | ation  | 1 |
| trf_1_1 | Bra023 | 19. |   |   |    |     |     | GGGGAUUAUAGCUCAGU | ACCACCGGACCUAUAUC | Transl |   |
| 68      | 165    | 3   | 6 | 1 | 20 | 229 | 248 | UGGU              | CCC               | ation  | 1 |
| trf_1_1 | Bra023 | 19. |   |   |    |     |     | GGGGAUUAUAGCUCAGU | ACCACCGGACCUAUAUC | Transl |   |
| 70      | 165    | 3   | 6 | 1 | 20 | 229 | 248 | UGGU              | CCC               | ation  | 1 |
| trf_1_1 | Bra023 | 19. |   |   |    |     |     | GGGGAUUAUAGCUCAGU | ACCACCGGACCUAUAUC | Transl |   |
| 71      | 165    | 3   | 6 | 1 | 20 | 229 | 248 | UGGU              | CCC               | ation  | 1 |
| trf_1_1 | Bra023 | 19. |   |   |    |     |     | GGGGAUUAUAGCUCAGU | ACCACCGGACCUAUAUC | Transl |   |
| 72      | 165    | 3   | 6 | 1 | 20 | 229 | 248 | UGGU              | CCC               | ation  | 1 |
| trf_1_1 | Bra023 | 19. |   |   |    |     |     | GGGGAUUAUAGCUCAGU | ACCACCGGACCUAUAUC | Transl |   |
| 84      | 165    | 3   | 6 | 1 | 20 | 229 | 248 | UGGU              | CCC               | ation  | 1 |
| trf_1_1 | Bra023 | 19. |   |   |    |     |     | GGGGAUUAUAGCUCAGU | ACCACCGGACCUAUAUC | Transl |   |
| 85      | 165    | 3   | 6 | 1 | 20 | 229 | 248 | UGGU              | CCC               | ation  | 1 |
| trf_1_1 | Bra023 | 19. |   |   |    |     |     | GGGGAUUAUAGCUCAGU | ACCACCGGACCUAUAUC | Transl |   |
| 86      | 165    | 3   | 6 | 1 | 20 | 229 | 248 | UGGU              | CCC               | ation  | 1 |
| trf_1_1 | Bra023 | 19. |   |   |    |     |     | GGGGAUUAUAGCUCAGU | ACCACCGGACCUAUAUC | Transl |   |
| 87      | 165    | 3   | 6 | 1 | 20 | 229 | 248 | UGGU              | CCC               | ation  | 1 |
| trf_1_2 | Bra023 | 19. |   |   |    |     |     | GGGGAUUAUAGCUCAGU | ACCACCGGACCUAUAUC | Transl |   |
| 34      | 165    | 3   | 6 | 1 | 20 | 229 | 248 | UGGU              | CCC               | ation  | 1 |
| trf_1_2 | Bra023 | 19. |   |   |    |     |     | GGGGAUUAUAGCUCAGU | ACCACCGGACCUAUAUC | Transl |   |
| 35      | 165    | 3   | 6 | 1 | 20 | 229 | 248 | UGGU              | CCC               | ation  | 1 |

|         |        |     |   |   |    |     |                   |                   |        |   |
|---------|--------|-----|---|---|----|-----|-------------------|-------------------|--------|---|
| trf_1_2 | Bra023 | 19. |   |   |    |     | GGGGAUUAUAGCUCAGU | ACCACCGGACCUAUAUC | Transl |   |
| 37      | 165    | 3   | 6 | 1 | 20 | 229 | 248 UGGU          | CCC               | ation  | 1 |
| trf_1_2 | Bra023 | 19. |   |   |    |     | GGGGAUUAUAGCUCAGU | ACCACCGGACCUAUAUC | Transl |   |
| 45      | 165    | 3   | 6 | 1 | 20 | 229 | 248 UGGU          | CCC               | ation  | 1 |
| trf_1_2 | Bra023 | 19. |   |   |    |     | GGGGAUUAUAGCUCAGU | ACCACCGGACCUAUAUC | Transl |   |
| 46      | 165    | 3   | 6 | 1 | 20 | 229 | 248 UGGU          | CCC               | ation  | 1 |
| trf_1_2 | Bra023 | 19. |   |   |    |     | GGGGAUUAUAGCUCAGU | ACCACCGGACCUAUAUC | Transl |   |
| 48      | 165    | 3   | 6 | 1 | 20 | 229 | 248 UGGU          | CCC               | ation  | 1 |
| trf_1_2 | Bra023 | 19. |   |   |    |     | GGGGAUUAUAGCUCAGU | ACCACCGGACCUAUAUC | Transl |   |
| 65      | 165    | 3   | 6 | 1 | 20 | 229 | 248 UGGU          | CCC               | ation  | 1 |
| trf_1_2 | Bra023 | 19. |   |   |    |     | GGGGAUUAUAGCUCAGU | ACCACCGGACCUAUAUC | Transl |   |
| 67      | 165    | 3   | 6 | 1 | 20 | 229 | 248 UGGU          | CCC               | ation  | 1 |
| trf_1_2 | Bra023 | 19. |   |   |    |     | GGGGAUUAUAGCUCAGU | ACCACCGGACCUAUAUC | Transl |   |
| 68      | 165    | 3   | 6 | 1 | 20 | 229 | 248 UGGU          | CCC               | ation  | 1 |
| trf_1_2 | Bra023 | 19. |   |   |    |     | GGGGAUUAUAGCUCAGU | ACCACCGGACCUAUAUC | Transl |   |
| 69      | 165    | 3   | 6 | 1 | 20 | 229 | 248 UGGU          | CCC               | ation  | 1 |
| trf_1_2 | Bra023 | 19. |   |   |    |     | GGGGAUUAUAGCUCAGU | ACCACCGGACCUAUAUC | Transl |   |
| 70      | 165    | 3   | 6 | 1 | 20 | 229 | 248 UGGU          | CCC               | ation  | 1 |
| trf_1_2 | Bra023 | 19. |   |   |    |     | GGGGAUUAUAGCUCAGU | ACCACCGGACCUAUAUC | Transl |   |
| 83      | 165    | 3   | 6 | 1 | 20 | 229 | 248 UGGU          | CCC               | ation  | 1 |
| trf_1_2 | Bra023 | 19. |   |   |    |     | GGGGAUUAUAGCUCAGU | ACCACCGGACCUAUAUC | Transl |   |
| 84      | 165    | 3   | 6 | 1 | 20 | 229 | 248 UGGU          | CCC               | ation  | 1 |
| trf_1_2 | Bra023 | 19. |   |   |    |     | GGGGAUUAUAGCUCAGU | ACCACCGGACCUAUAUC | Transl |   |
| 85      | 165    | 3   | 6 | 1 | 20 | 229 | 248 UGGU          | CCC               | ation  | 1 |
| trf_1_2 | Bra023 | 19. |   |   |    |     | GGGGAUUAUAGCUCAGU | ACCACCGGACCUAUAUC | Transl |   |
| 94      | 165    | 3   | 6 | 1 | 20 | 229 | 248 UGGU          | CCC               | ation  | 1 |
| trf_1_2 | Bra023 | 19. |   |   |    |     | GGGGAUUAUAGCUCAGU | ACCACCGGACCUAUAUC | Transl |   |
| 95      | 165    | 3   | 6 | 1 | 20 | 229 | 248 UGGU          | CCC               | ation  | 1 |
| trf_1_2 | Bra023 | 19. |   |   |    |     | GGGGAUUAUAGCUCAGU | ACCACCGGACCUAUAUC | Transl |   |
| 96      | 165    | 3   | 6 | 1 | 20 | 229 | 248 UGGU          | CCC               | ation  | 1 |
| trf_1_2 | Bra023 | 19. |   |   |    |     | GGGGAUUAUAGCUCAGU | ACCACCGGACCUAUAUC | Transl |   |
| 98      | 165    | 3   | 6 | 1 | 20 | 229 | 248 UGGU          | CCC               | ation  | 1 |
| trf_1_3 | Bra023 | 19. |   |   |    |     | GGGGAUUAUAGCUCAGU | ACCACCGGACCUAUAUC | Transl |   |
| 01      | 165    | 3   | 6 | 1 | 20 | 229 | 248 UGGU          | CCC               | ation  | 1 |

|         |        |     |   |   |    |     |                   |                   |        |   |
|---------|--------|-----|---|---|----|-----|-------------------|-------------------|--------|---|
| trf_1_3 | Bra023 | 19. |   |   |    |     | GGGGAUUAUAGCUCAGU | ACCACCGGACCUAUAUC | Transl |   |
| 03      | 165    | 3   | 6 | 1 | 20 | 229 | 248 UGGU          | CCC               | ation  | 1 |
| trf_1_3 | Bra023 | 19. |   |   |    |     | GGGGAUUAUAGCUCAGU | ACCACCGGACCUAUAUC | Transl |   |
| 04      | 165    | 3   | 6 | 1 | 20 | 229 | 248 UGGU          | CCC               | ation  | 1 |
| trf_1_3 | Bra023 | 19. |   |   |    |     | GGGGAUUAUAGCUCAGU | ACCACCGGACCUAUAUC | Transl |   |
| 05      | 165    | 3   | 6 | 1 | 20 | 229 | 248 UGGU          | CCC               | ation  | 1 |
| trf_1_3 | Bra023 | 19. |   |   |    |     | GGGGAUUAUAGCUCAGU | ACCACCGGACCUAUAUC | Transl |   |
| 08      | 165    | 3   | 6 | 1 | 20 | 229 | 248 UGGU          | CCC               | ation  | 1 |
| trf_1_3 | Bra023 | 19. |   |   |    |     | GGGGAUUAUAGCUCAGU | ACCACCGGACCUAUAUC | Transl |   |
| 09      | 165    | 3   | 6 | 1 | 20 | 229 | 248 UGGU          | CCC               | ation  | 1 |
| trf_1_3 | Bra023 | 19. |   |   |    |     | GGGGAUUAUAGCUCAGU | ACCACCGGACCUAUAUC | Transl |   |
| 10      | 165    | 3   | 6 | 1 | 20 | 229 | 248 UGGU          | CCC               | ation  | 1 |
| trf_1_3 | Bra023 | 19. |   |   |    |     | GGGGAUUAUAGCUCAGU | ACCACCGGACCUAUAUC | Transl |   |
| 15      | 165    | 3   | 6 | 1 | 20 | 229 | 248 UGGU          | CCC               | ation  | 1 |
| trf_1_3 | Bra023 | 19. |   |   |    |     | GGGGAUUAUAGCUCAGU | ACCACCGGACCUAUAUC | Transl |   |
| 16      | 165    | 3   | 6 | 1 | 20 | 229 | 248 UGGU          | CCC               | ation  | 1 |
| trf_1_3 | Bra023 | 19. |   |   |    |     | GGGGAUUAUAGCUCAGU | ACCACCGGACCUAUAUC | Transl |   |
| 17      | 165    | 3   | 6 | 1 | 20 | 229 | 248 UGGU          | CCC               | ation  | 1 |
| trf_1_3 | Bra023 | 19. |   |   |    |     | GGGGAUUAUAGCUCAGU | ACCACCGGACCUAUAUC | Transl |   |
| 18      | 165    | 3   | 6 | 1 | 20 | 229 | 248 UGGU          | CCC               | ation  | 1 |
| trf_1_3 | Bra023 | 19. |   |   |    |     | GGGGAUUAUAGCUCAGU | ACCACCGGACCUAUAUC | Transl |   |
| 21      | 165    | 3   | 6 | 1 | 20 | 229 | 248 UGGU          | CCC               | ation  | 1 |
| trf_1_3 | Bra023 | 19. |   |   |    |     | GGGGAUUAUAGCUCAGU | ACCACCGGACCUAUAUC | Transl |   |
| 24      | 165    | 3   | 6 | 1 | 20 | 229 | 248 UGGU          | CCC               | ation  | 1 |
| trf_1_3 | Bra023 | 19. |   |   |    |     | GGGGAUUAUAGCUCAGU | ACCACCGGACCUAUAUC | Transl |   |
| 25      | 165    | 3   | 6 | 1 | 20 | 229 | 248 UGGU          | CCC               | ation  | 1 |
| trf_1_3 | Bra023 | 19. |   |   |    |     | GGGGAUUAUAGCUCAGU | ACCACCGGACCUAUAUC | Transl |   |
| 33      | 165    | 3   | 6 | 1 | 20 | 229 | 248 UGGU          | CCC               | ation  | 1 |
| trf_1_3 | Bra023 | 19. |   |   |    |     | GGGGAUUAUAGCUCAGU | ACCACCGGACCUAUAUC | Transl |   |
| 34      | 165    | 3   | 6 | 1 | 20 | 229 | 248 UGGU          | CCC               | ation  | 1 |
| trf_1_3 | Bra023 | 19. |   |   |    |     | GGGGAUUAUAGCUCAGU | ACCACCGGACCUAUAUC | Transl |   |
| 35      | 165    | 3   | 6 | 1 | 20 | 229 | 248 UGGU          | CCC               | ation  | 1 |
| trf_1_3 | Bra023 | 19. |   |   |    |     | GGGGAUUAUAGCUCAGU | ACCACCGGACCUAUAUC | Transl |   |
| 39      | 165    | 3   | 6 | 1 | 20 | 229 | 248 UGGU          | CCC               | ation  | 1 |



|         |        |     |   |   |    |     |                   |                   |        |   |
|---------|--------|-----|---|---|----|-----|-------------------|-------------------|--------|---|
| trf_1_3 | Bra023 | 19. |   |   |    |     | GGGGAUUAUAGCUCAGU | ACCACCGGACCUAUAUC | Transl |   |
| 40      | 165    | 3   | 6 | 1 | 20 | 229 | 248 UGGU          | CCC               | ation  | 1 |
| trf_1_3 | Bra023 | 19. |   |   |    |     | GGGGAUUAUAGCUCAGU | ACCACCGGACCUAUAUC | Transl |   |
| 42      | 165    | 3   | 6 | 1 | 20 | 229 | 248 UGGU          | CCC               | ation  | 1 |
| trf_1_3 | Bra023 | 19. |   |   |    |     | GGGGAUUAUAGCUCAGU | ACCACCGGACCUAUAUC | Transl |   |
| 43      | 165    | 3   | 6 | 1 | 20 | 229 | 248 UGGU          | CCC               | ation  | 1 |
| trf_1_3 | Bra023 | 19. |   |   |    |     | GGGGAUUAUAGCUCAGU | ACCACCGGACCUAUAUC | Transl |   |
| 44      | 165    | 3   | 6 | 1 | 20 | 229 | 248 UGGU          | CCC               | ation  | 1 |
| trf_1_3 | Bra023 | 19. |   |   |    |     | GGGGAUUAUAGCUCAGU | ACCACCGGACCUAUAUC | Transl |   |
| 52      | 165    | 3   | 6 | 1 | 20 | 229 | 248 UGGU          | CCC               | ation  | 1 |
| trf_1_3 | Bra023 | 19. |   |   |    |     | GGGGAUUAUAGCUCAGU | ACCACCGGACCUAUAUC | Transl |   |
| 54      | 165    | 3   | 6 | 1 | 20 | 229 | 248 UGGU          | CCC               | ation  | 1 |
| trf_1_3 | Bra023 | 19. |   |   |    |     | GGGGAUUAUAGCUCAGU | ACCACCGGACCUAUAUC | Transl |   |
| 55      | 165    | 3   | 6 | 1 | 20 | 229 | 248 UGGU          | CCC               | ation  | 1 |
| trf_1_3 | Bra023 | 19. |   |   |    |     | GGGGAUUAUAGCUCAGU | ACCACCGGACCUAUAUC | Transl |   |
| 56      | 165    | 3   | 6 | 1 | 20 | 229 | 248 UGGU          | CCC               | ation  | 1 |
| trf_1_3 | Bra023 | 19. |   |   |    |     | GGGGAUUAUAGCUCAGU | ACCACCGGACCUAUAUC | Transl |   |
| 57      | 165    | 3   | 6 | 1 | 20 | 229 | 248 UGGU          | CCC               | ation  | 1 |
| trf_1_3 | Bra023 | 19. |   |   |    |     | GGGGAUUAUAGCUCAGU | ACCACCGGACCUAUAUC | Transl |   |
| 58      | 165    | 3   | 6 | 1 | 20 | 229 | 248 UGGU          | CCC               | ation  | 1 |
| trf_1_3 | Bra023 | 19. |   |   |    |     | GGGGAUUAUAGCUCAGU | ACCACCGGACCUAUAUC | Transl |   |
| 61      | 165    | 3   | 6 | 1 | 20 | 229 | 248 UGGU          | CCC               | ation  | 1 |
| trf_1_3 | Bra023 | 19. |   |   |    |     | GGGGAUUAUAGCUCAGU | ACCACCGGACCUAUAUC | Transl |   |
| 63      | 165    | 3   | 6 | 1 | 20 | 229 | 248 UGGU          | CCC               | ation  | 1 |
| trf_1_3 | Bra023 | 19. |   |   |    |     | GGGGAUUAUAGCUCAGU | ACCACCGGACCUAUAUC | Transl |   |
| 64      | 165    | 3   | 6 | 1 | 20 | 229 | 248 UGGU          | CCC               | ation  | 1 |
| trf_1_3 | Bra023 | 19. |   |   |    |     | GGGGAUUAUAGCUCAGU | ACCACCGGACCUAUAUC | Transl |   |
| 65      | 165    | 3   | 6 | 1 | 20 | 229 | 248 UGGU          | CCC               | ation  | 1 |
| trf_1_3 | Bra023 | 19. |   |   |    |     | GGGGAUUAUAGCUCAGU | ACCACCGGACCUAUAUC | Transl |   |
| 76      | 165    | 3   | 6 | 1 | 20 | 229 | 248 UGGU          | CCC               | ation  | 1 |
| trf_1_3 | Bra023 | 19. |   |   |    |     | GGGGAUUAUAGCUCAGU | ACCACCGGACCUAUAUC | Transl |   |
| 77      | 165    | 3   | 6 | 1 | 20 | 229 | 248 UGGU          | CCC               | ation  | 1 |
| trf_1_3 | Bra023 | 19. |   |   |    |     | GGGGAUUAUAGCUCAGU | ACCACCGGACCUAUAUC | Transl |   |
| 78      | 165    | 3   | 6 | 1 | 20 | 229 | 248 UGGU          | CCC               | ation  | 1 |

|         |        |     |   |   |    |     |                   |                   |        |   |
|---------|--------|-----|---|---|----|-----|-------------------|-------------------|--------|---|
| trf_1_3 | Bra023 | 19. |   |   |    |     | GGGGAUUAUAGCUCAGU | ACCACCGGACCUAUAUC | Transl |   |
| 80      | 165    | 3   | 6 | 1 | 20 | 229 | 248 UGGU          | CCC               | ation  | 1 |
| trf_1_3 | Bra023 | 19. |   |   |    |     | GGGGAUUAUAGCUCAGU | ACCACCGGACCUAUAUC | Transl |   |
| 84      | 165    | 3   | 6 | 1 | 20 | 229 | 248 UGGU          | CCC               | ation  | 1 |
| trf_1_3 | Bra023 | 19. |   |   |    |     | GGGGAUUAUAGCUCAGU | ACCACCGGACCUAUAUC | Transl |   |
| 85      | 165    | 3   | 6 | 1 | 20 | 229 | 248 UGGU          | CCC               | ation  | 1 |
| trf_1_3 | Bra023 | 19. |   |   |    |     | GGGGAUUAUAGCUCAGU | ACCACCGGACCUAUAUC | Transl |   |
| 86      | 165    | 3   | 6 | 1 | 20 | 229 | 248 UGGU          | CCC               | ation  | 1 |
| trf_1_3 | Bra023 | 19. |   |   |    |     | GGGGAUUAUAGCUCAGU | ACCACCGGACCUAUAUC | Transl |   |
| 87      | 165    | 3   | 6 | 1 | 20 | 229 | 248 UGGU          | CCC               | ation  | 1 |
| trf_1_3 | Bra023 | 19. |   |   |    |     | GGGGAUUAUAGCUCAGU | ACCACCGGACCUAUAUC | Transl |   |
| 94      | 165    | 3   | 6 | 1 | 20 | 229 | 248 UGGU          | CCC               | ation  | 1 |
| trf_1_3 | Bra023 | 19. |   |   |    |     | GGGGAUUAUAGCUCAGU | ACCACCGGACCUAUAUC | Transl |   |
| 95      | 165    | 3   | 6 | 1 | 20 | 229 | 248 UGGU          | CCC               | ation  | 1 |
| trf_1_3 | Bra023 | 19. |   |   |    |     | GGGGAUUAUAGCUCAGU | ACCACCGGACCUAUAUC | Transl |   |
| 96      | 165    | 3   | 6 | 1 | 20 | 229 | 248 UGGU          | CCC               | ation  | 1 |
| trf_1_3 | Bra023 | 19. |   |   |    |     | GGGGAUUAUAGCUCAGU | ACCACCGGACCUAUAUC | Transl |   |
| 97      | 165    | 3   | 6 | 1 | 20 | 229 | 248 UGGU          | CCC               | ation  | 1 |
| trf_1_4 | Bra023 | 19. |   |   |    |     | GGGGAUUAUAGCUCAGU | ACCACCGGACCUAUAUC | Transl |   |
| 01      | 165    | 3   | 6 | 1 | 20 | 229 | 248 UGGU          | CCC               | ation  | 1 |
| trf_1_4 | Bra023 | 19. |   |   |    |     | GGGGAUUAUAGCUCAGU | ACCACCGGACCUAUAUC | Transl |   |
| 02      | 165    | 3   | 6 | 1 | 20 | 229 | 248 UGGU          | CCC               | ation  | 1 |
| trf_1_4 | Bra023 | 19. |   |   |    |     | GGGGAUUAUAGCUCAGU | ACCACCGGACCUAUAUC | Transl |   |
| 03      | 165    | 3   | 6 | 1 | 20 | 229 | 248 UGGU          | CCC               | ation  | 1 |
| trf_1_4 | Bra023 | 19. |   |   |    |     | GGGGAUUAUAGCUCAGU | ACCACCGGACCUAUAUC | Transl |   |
| 05      | 165    | 3   | 6 | 1 | 20 | 229 | 248 UGGU          | CCC               | ation  | 1 |
| trf_1_4 | Bra023 | 19. |   |   |    |     | GGGGAUUAUAGCUCAGU | ACCACCGGACCUAUAUC | Transl |   |
| 06      | 165    | 3   | 6 | 1 | 20 | 229 | 248 UGGU          | CCC               | ation  | 1 |
| trf_1_4 | Bra023 | 19. |   |   |    |     | GGGGAUUAUAGCUCAGU | ACCACCGGACCUAUAUC | Transl |   |
| 07      | 165    | 3   | 6 | 1 | 20 | 229 | 248 UGGU          | CCC               | ation  | 1 |
| trf_1_4 | Bra023 | 19. |   |   |    |     | GGGGAUUAUAGCUCAGU | ACCACCGGACCUAUAUC | Transl |   |
| 09      | 165    | 3   | 6 | 1 | 20 | 229 | 248 UGGU          | CCC               | ation  | 1 |
| trf_1_4 | Bra023 | 19. |   |   |    |     | GGGGAUUAUAGCUCAGU | ACCACCGGACCUAUAUC | Transl |   |
| 11      | 165    | 3   | 6 | 1 | 20 | 229 | 248 UGGU          | CCC               | ation  | 1 |

|         |        |     |   |    |     |     |                   |                   |        |   |
|---------|--------|-----|---|----|-----|-----|-------------------|-------------------|--------|---|
| trf_1_4 | Bra023 | 19. |   |    |     |     | GGGGAUUAUAGCUCAGU | ACCACCGGACCUAUAUC | Transl |   |
| 83      | 165    | 3 6 | 1 | 20 | 229 | 248 | UGGU              | CCC               | ation  | 1 |
| trf_1_4 | Bra023 | 19. |   |    |     |     | GGGGAUUAUAGCUCAGU | ACCACCGGACCUAUAUC | Transl |   |
| 84      | 165    | 3 6 | 1 | 20 | 229 | 248 | UGGU              | CCC               | ation  | 1 |
| trf_1_4 | Bra023 | 19. |   |    |     |     | GGGGAUUAUAGCUCAGU | ACCACCGGACCUAUAUC | Transl |   |
| 85      | 165    | 3 6 | 1 | 20 | 229 | 248 | UGGU              | CCC               | ation  | 1 |
| trf_1_4 | Bra023 | 19. |   |    |     |     | GGGGAUUAUAGCUCAGU | ACCACCGGACCUAUAUC | Transl |   |
| 87      | 165    | 3 6 | 1 | 20 | 229 | 248 | UGGU              | CCC               | ation  | 1 |
| trf_1_4 | Bra023 | 19. |   |    |     |     | GGGGAUUAUAGCUCAGU | ACCACCGGACCUAUAUC | Transl |   |
| 88      | 165    | 3 6 | 1 | 20 | 229 | 248 | UGGU              | CCC               | ation  | 1 |
| trf_1_4 | Bra023 | 19. |   |    |     |     | GGGGAUUAUAGCUCAGU | ACCACCGGACCUAUAUC | Transl |   |
| 90      | 165    | 3 6 | 1 | 20 | 229 | 248 | UGGU              | CCC               | ation  | 1 |
| trf_1_4 | Bra023 | 19. |   |    |     |     | GGGGAUUAUAGCUCAGU | ACCACCGGACCUAUAUC | Transl |   |
| 91      | 165    | 3 6 | 1 | 20 | 229 | 248 | UGGU              | CCC               | ation  | 1 |
| trf_1_4 | Bra023 | 19. |   |    |     |     | GGGGAUUAUAGCUCAGU | ACCACCGGACCUAUAUC | Transl |   |
| 92      | 165    | 3 6 | 1 | 20 | 229 | 248 | UGGU              | CCC               | ation  | 1 |
| trf_1_4 | Bra023 | 19. |   |    |     |     | GGGGAUUAUAGCUCAGU | ACCACCGGACCUAUAUC | Transl |   |
| 93      | 165    | 3 6 | 1 | 20 | 229 | 248 | UGGU              | CCC               | ation  | 1 |
| trf_1_4 | Bra023 | 19. |   |    |     |     | GGGGAUUAUAGCUCAGU | ACCACCGGACCUAUAUC | Transl |   |
| 95      | 165    | 3 6 | 1 | 20 | 229 | 248 | UGGU              | CCC               | ation  | 1 |
| trf_1_5 | Bra023 | 19. |   |    |     |     | GGGGAUUAUAGCUCAGU | ACCACCGGACCUAUAUC | Transl |   |
| 00      | 165    | 3 6 | 1 | 20 | 229 | 248 | UGGU              | CCC               | ation  | 1 |
| trf_1_5 | Bra023 | 19. |   |    |     |     | GGGGAUUAUAGCUCAGU | ACCACCGGACCUAUAUC | Transl |   |
| 01      | 165    | 3 6 | 1 | 20 | 229 | 248 | UGGU              | CCC               | ation  | 1 |
| trf_1_5 | Bra023 | 19. |   |    |     |     | GGGGAUUAUAGCUCAGU | ACCACCGGACCUAUAUC | Transl |   |
| 02      | 165    | 3 6 | 1 | 20 | 229 | 248 | UGGU              | CCC               | ation  | 1 |
| trf_1_5 | Bra023 | 19. |   |    |     |     | GGGGAUUAUAGCUCAGU | ACCACCGGACCUAUAUC | Transl |   |
| 03      | 165    | 3 6 | 1 | 20 | 229 | 248 | UGGU              | CCC               | ation  | 1 |
| trf_1_5 | Bra023 | 19. |   |    |     |     | GGGGAUUAUAGCUCAGU | ACCACCGGACCUAUAUC | Transl |   |
| 04      | 165    | 3 6 | 1 | 20 | 229 | 248 | UGGU              | CCC               | ation  | 1 |
| trf_1_4 | Bra023 | 12. |   |    |     |     | GGGAUUGUAGUUCAAU  | UCCAAGUGAACAUCAAU | Transl |   |
| 18      | 172    | 3 4 | 1 | 20 | 614 | 633 | UGGA              | CCC               | ation  | 1 |
| trf_1_4 | Bra023 | 12. |   |    |     |     | GGGAUUGUAGUUCAAU  | UCCAAGUGAACAUCAA  | Transl |   |
| 19      | 172    | 3 4 | 1 | 21 | 613 | 633 | UGGAA             | UCCC              | ation  | 1 |

|         |        |     |     |   |    |      |      |                   |                   |        |   |
|---------|--------|-----|-----|---|----|------|------|-------------------|-------------------|--------|---|
| trf_1_4 | Bra023 | 12. |     |   |    |      |      | GGGAUUGUAGUUCAAU  | UCCAAGUGAACAUCAAU | Transl |   |
| 34      | 172    | 3   | 4   | 1 | 20 | 614  | 633  | UGGA              | CCC               | ation  | 1 |
| trf_1_4 | Bra023 | 12. |     |   |    |      |      | GGGAUUGUAGUUCAAU  | UUUCCAAGUGAACAUUC | Transl |   |
| 45      | 172    | 3   | 4   | 1 | 22 | 612  | 633  | UGGAAA            | AAUCCC            | ation  | 1 |
| trf_1_4 | Bra023 | 12. |     |   |    |      |      | GGGAUUGUAGUUCAAU  | UCCAAGUGAACAUCAAU | Transl |   |
| 47      | 172    | 3   | 4   | 1 | 20 | 614  | 633  | UGGA              | CCC               | ation  | 1 |
| trf_1_4 | Bra023 | 12. |     |   |    |      |      | GGGAUUGUAGUUCAAU  | UUUCCAAGUGAACAUUC | Transl |   |
| 56      | 172    | 3   | 4   | 1 | 22 | 612  | 633  | UGGAGA            | AAUCCC            | ation  | 1 |
| trf_1_4 | Bra023 | 12. |     |   |    |      |      | GGGAUUGUAGUUCAAU  | UUCCAAGUGAACAUCAA | Transl |   |
| 65      | 172    | 3   | 4   | 1 | 21 | 613  | 633  | UGGAG             | UCCC              | ation  | 1 |
| trf_1_4 | Bra023 |     |     |   |    |      |      | GGUUCUAUGGUGUAGU  | AACCAAUACAUGAUAGA | Transl |   |
| 77      | 904    | 3   | 9.9 | 1 | 20 | 1163 | 1182 | GGUU              | AUC               | ation  | 1 |
| trf_1_5 | Bra023 |     |     |   |    |      |      | GGUUCUAUGGUGUAGU  | AACCAAUACAUGAUAGA | Transl |   |
| 39      | 904    | 3   | 9.9 | 1 | 20 | 1163 | 1182 | GGUU              | AUC               | ation  | 1 |
| trf_1_1 | Bra024 | 22. |     |   |    |      |      | GGGGAUUAUAGCUCAGU | UCCAACAGAGUUGUAU  | Cleava |   |
| 4       | 084    | 3   | 2   | 1 | 20 | 1249 | 1268 | UGGG              | CCUC              | ge     | 1 |
| trf_1_2 | Bra024 | 20. |     |   |    |      |      | GCGUCCAUUGUCUAAU  | GUUCUGUCCAUCAGAU  | Cleava |   |
| 71      | 316    | 3   | 4   | 1 | 25 | 431  | 455  | GGAUAGGAC         | ACUGGACGC         | ge     | 1 |
| trf_1_2 | Bra024 | 20. |     |   |    |      |      | GCGUCCAUUGUCUAAU  | UUCUGUCCAUCAGAU   | Cleava |   |
| 72      | 316    | 3   | 4   | 1 | 24 | 432  | 455  | GGAUAGGA          | CUGGACGC          | ge     | 1 |
| trf_1_2 | Bra024 | 20. |     |   |    |      |      | GCGUCCAUUGUCUAAU  | GUUCUGUCCAUCAGAU  | Cleava |   |
| 73      | 316    | 3   | 4   | 1 | 25 | 431  | 455  | GGAUAGGAC         | ACUGGACGC         | ge     | 1 |
| trf_1_2 | Bra024 | 20. |     |   |    |      |      | GCGUCCAUUGUCUAAU  | GUCCAUCAGAUACUGG  | Cleava |   |
| 74      | 316    | 3   | 4   | 1 | 20 | 436  | 455  | GGAU              | ACGC              | ge     | 1 |
| trf_1_2 | Bra024 | 20. |     |   |    |      |      | GCGUCCAUUGUCUAAU  | UCUGUCCAUCAGAUAC  | Cleava |   |
| 75      | 316    | 3   | 4   | 1 | 23 | 433  | 455  | GGAUAGG           | UGGACGC           | ge     | 1 |
| trf_1_2 | Bra024 | 20. |     |   |    |      |      | GCGUCCAUUGUCUAAU  | AGGUUCUGUCCAUCAG  | Cleava |   |
| 76      | 316    | 3   | 4   | 1 | 27 | 429  | 455  | GGAUAGGACAU       | AUACUGGACGC       | ge     | 1 |
| trf_1_2 | Bra024 | 20. |     |   |    |      |      | GCGUCCAUUGUCUAAU  | UGUCCAUCAGAUACUG  | Cleava |   |
| 78      | 316    | 3   | 4   | 1 | 21 | 435  | 455  | GGAU              | GACGC             | ge     | 1 |
| trf_1_2 | Bra024 | 20. |     |   |    |      |      | GCGUCCAUUGUCUAAU  | CUGUCCAUCAGAUACU  | Cleava |   |
| 79      | 316    | 3   | 4   | 1 | 22 | 434  | 455  | GGAUAG            | GGACGC            | ge     | 1 |
|         | Bra024 |     |     |   |    |      |      | GGGGAUGUAGCUCAA   | UCCAACAUUUCGGUUA  | Cleava |   |
| trf_1_2 | 638    | 3   | 7.5 | 1 | 23 | 203  | 225  | UGGUAGA           | CAUCCCC           | ge     | 1 |

|         |               |   |     |   |    |     |     |                              |                             |              |   |
|---------|---------------|---|-----|---|----|-----|-----|------------------------------|-----------------------------|--------------|---|
| trf_1_3 | Bra024<br>638 | 3 | 7.5 | 1 | 24 | 202 | 225 | GGGGAUGUAGCUCAAA<br>UGGUAGAG | UCCAACAUUUCGGUU<br>ACAUCCCC | Cleava<br>ge | 1 |
| trf_1_5 | Bra024<br>638 | 3 | 7.5 | 1 | 20 | 206 | 225 | GGGGAUGUAGCUCAAA<br>UGGU     | AACAUUUCGGUUACAU<br>CCCC    | Cleava<br>ge | 1 |
| trf_1_6 | Bra024<br>638 | 3 | 7.5 | 1 | 23 | 203 | 225 | GGGGAUGUAGCUCAAA<br>UGGUAGA  | UCCAACAUUUCGGUUA<br>CAUCCCC | Cleava<br>ge | 1 |
| trf_1_1 | Bra024<br>638 | 3 | 7.5 | 1 | 20 | 206 | 225 | GGGGAUGUAGCUCAAA<br>UGGU     | AACAUUUCGGUUACAU<br>CCCC    | Cleava<br>ge | 1 |
| trf_1_2 | Bra024<br>638 | 3 | 7.5 | 1 | 23 | 203 | 225 | GGGGAUGUAGCUCAAA<br>UGGUAGA  | UCCAACAUUUCGGUUA<br>CAUCCCC | Cleava<br>ge | 1 |
| trf_1_2 | Bra024<br>638 | 3 | 7.5 | 1 | 23 | 203 | 225 | GGGGAUGUAGCUCAAA<br>UGGUAGA  | UCCAACAUUUCGGUUA<br>CAUCCCC | Cleava<br>ge | 1 |
| trf_1_3 | Bra024<br>638 | 3 | 7.5 | 1 | 20 | 206 | 225 | GGGGAUGUAGCUCAAA<br>UGGU     | AACAUUUCGGUUACAU<br>CCCC    | Cleava<br>ge | 1 |
| trf_1_7 | Bra024<br>638 | 3 | 7.5 | 1 | 23 | 203 | 225 | GGGGAUGUAGCUCAAA<br>UGGUAGA  | UCCAACAUUUCGGUUA<br>CAUCCCC | Cleava<br>ge | 1 |
| trf_1_7 | Bra024<br>638 | 3 | 7.5 | 1 | 20 | 206 | 225 | GGGGAUGUAGCUCAAA<br>UGGU     | AACAUUUCGGUUACAU<br>CCCC    | Cleava<br>ge | 1 |
| trf_1_1 | Bra024<br>638 | 3 | 7.5 | 1 | 20 | 206 | 225 | GGGGAUGUAGCUCAAA<br>UGGU     | AACAUUUCGGUUACAU<br>CCCC    | Cleava<br>ge | 1 |
| trf_1_1 | Bra024<br>638 | 3 | 7.5 | 1 | 23 | 203 | 225 | GGGGAUGUAGCUCAAA<br>UGGUAGA  | UCCAACAUUUCGGUUA<br>CAUCCCC | Cleava<br>ge | 1 |
| trf_1_1 | Bra024<br>638 | 3 | 7.5 | 1 | 24 | 202 | 225 | GGGGAUGUAGCUCAAA<br>UGGUAGAG | UCCAACAUUUCGGUU<br>ACAUCCCC | Cleava<br>ge | 1 |
| trf_1_1 | Bra024<br>638 | 3 | 7.5 | 1 | 23 | 203 | 225 | GGGGAUGUAGCUCAAA<br>UGGUAGA  | UCCAACAUUUCGGUUA<br>CAUCCCC | Cleava<br>ge | 1 |
| trf_1_1 | Bra024<br>638 | 3 | 7.5 | 1 | 20 | 206 | 225 | GGGGAUGUAGCUCAAA<br>UGGU     | AACAUUUCGGUUACAU<br>CCCC    | Cleava<br>ge | 1 |
| trf_1_1 | Bra024<br>638 | 3 | 7.5 | 1 | 23 | 203 | 225 | GGGGAUGUAGCUCAAA<br>UGGUAGA  | UCCAACAUUUCGGUUA<br>CAUCCCC | Cleava<br>ge | 1 |
| trf_1_1 | Bra024<br>638 | 3 | 7.5 | 1 | 20 | 206 | 225 | GGGGAUGUAGCUCAAA<br>UGGU     | AACAUUUCGGUUACAU<br>CCCC    | Cleava<br>ge | 1 |
| trf_1_3 | Bra024<br>638 | 3 | 7.5 | 1 | 20 | 206 | 225 | GGGGAUGUAGCUCAAA<br>UGGU     | AACAUUUCGGUUACAU<br>CCCC    | Cleava<br>ge | 1 |

|         |        |   |     |   |    |     |     |                  |                  |        |   |
|---------|--------|---|-----|---|----|-----|-----|------------------|------------------|--------|---|
| trf_1_3 | Bra024 |   |     |   |    |     |     | GGGGAUGUAGCUCAAA | UCCAACAUUUCGGUUA | Cleava |   |
| 37      | 638    | 3 | 7.5 | 1 | 23 | 203 | 225 | UGGUAGA          | CAUCCCC          | ge     | 1 |
| trf_1_3 | Bra024 |   |     |   |    |     |     | GGGGAUGUAGCUCAAA | UCCAACAUUUCGGUUA | Cleava |   |
| 67      | 638    | 3 | 7.5 | 1 | 23 | 203 | 225 | UGGUAGA          | CAUCCCC          | ge     | 1 |
| trf_1_3 | Bra024 |   |     |   |    |     |     | GGGGAUGUAGCUCAAA | UUCCAACAUUUCGGUU | Cleava |   |
| 68      | 638    | 3 | 7.5 | 1 | 24 | 202 | 225 | UGGUAGAG         | ACAUCCCC         | ge     | 1 |
| trf_1_5 | Bra024 |   |     |   |    |     |     | GGGGAUGUAGCUCAAA | UCCAACAUUUCGGUUA | Cleava |   |
| 17      | 638    | 3 | 7.5 | 1 | 23 | 203 | 225 | UGGUAGA          | CAUCCCC          | ge     | 1 |
| trf_1_5 | Bra024 |   |     |   |    |     |     | GGGGAUGUAGCUCAAA | UUCCAACAUUUCGGUU | Cleava |   |
| 18      | 638    | 3 | 7.5 | 1 | 24 | 202 | 225 | UGGUAGAG         | ACAUCCCC         | ge     | 1 |
| trf_1_5 | Bra024 |   |     |   |    |     |     | GGGGAUGUAGCUCAAA | AACAUUUCGGUUACAU | Cleava |   |
| 19      | 638    | 3 | 7.5 | 1 | 20 | 206 | 225 | UGGU             | CCCC             | ge     | 1 |
| trf_1_5 | Bra024 |   |     |   |    |     |     | GGGGAUGUAGCUCAAA | UCCAACAUUUCGGUUA | Cleava |   |
| 66      | 638    | 3 | 7.5 | 1 | 23 | 203 | 225 | UGGUAGA          | CAUCCCC          | ge     | 1 |
| trf_1_5 | Bra024 |   |     |   |    |     |     | GGGGAUGUAGCUCAAA | UUCCAACAUUUCGGUU | Cleava |   |
| 67      | 638    | 3 | 7.5 | 1 | 24 | 202 | 225 | UGGUAGAG         | ACAUCCCC         | ge     | 1 |
| trf_1_5 | Bra024 |   |     |   |    |     |     | GGGGAUGUAGCUCAAA | AACAUUUCGGUUACAU | Cleava |   |
| 68      | 638    | 3 | 7.5 | 1 | 20 | 206 | 225 | UGGU             | CCCC             | ge     | 1 |
|         | Bra025 |   | 17. |   |    |     |     | GGGGAUGUAGCUCAAA | ACAAUUUGAGCUUCAU | Cleava |   |
| trf_1_2 | 904    | 3 | 2   | 1 | 20 | 344 | 363 | UGGU             | CUUC             | ge     | 1 |
|         | Bra025 |   | 17. |   |    |     |     | GGGGAUGUAGCUCAAA | ACAAUUUGAGCUUCAU | Cleava |   |
| trf_1_3 | 904    | 3 | 2   | 1 | 20 | 344 | 363 | UGGU             | CUUC             | ge     | 1 |
|         | Bra025 |   | 17. |   |    |     |     | GGGGAUGUAGCUCAAA | ACAAUUUGAGCUUCAU | Cleava |   |
| trf_1_5 | 904    | 3 | 2   | 1 | 20 | 344 | 363 | UGGU             | CUUC             | ge     | 1 |
|         | Bra025 |   | 17. |   |    |     |     | GGGGAUGUAGCUCAAA | ACAAUUUGAGCUUCAU | Cleava |   |
| trf_1_6 | 904    | 3 | 2   | 1 | 20 | 344 | 363 | UGGU             | CUUC             | ge     | 1 |
| trf_1_1 | Bra025 |   | 17. |   |    |     |     | GGGGAUGUAGCUCAAA | ACAAUUUGAGCUUCAU | Cleava |   |
| 9       | 904    | 3 | 2   | 1 | 20 | 344 | 363 | UGGU             | CUUC             | ge     | 1 |
| trf_1_2 | Bra025 |   | 17. |   |    |     |     | GGGGAUGUAGCUCAAA | ACAAUUUGAGCUUCAU | Cleava |   |
| 0       | 904    | 3 | 2   | 1 | 20 | 344 | 363 | UGGU             | CUUC             | ge     | 1 |
| trf_1_2 | Bra025 |   | 17. |   |    |     |     | GGGGAUGUAGCUCAAA | ACAAUUUGAGCUUCAU | Cleava |   |
| 9       | 904    | 3 | 2   | 1 | 20 | 344 | 363 | UGGU             | CUUC             | ge     | 1 |
| trf_1_3 | Bra025 |   | 17. |   |    |     |     | GGGGAUGUAGCUCAAA | ACAAUUUGAGCUUCAU | Cleava |   |
| 0       | 904    | 3 | 2   | 1 | 20 | 344 | 363 | UGGU             | CUUC             | ge     | 1 |

|         |        |     |   |   |    |     |     |                  |                  |        |   |
|---------|--------|-----|---|---|----|-----|-----|------------------|------------------|--------|---|
| trf_1_7 | Bra025 | 17. |   |   |    |     |     | GGGGAUGUAGCUCAAA | ACAAUUUGAGCUUCAU | Cleava |   |
| 2       | 904    | 3   | 2 | 1 | 20 | 344 | 363 | UGGU             | CUUC             | ge     | 1 |
| trf_1_7 | Bra025 | 17. |   |   |    |     |     | GGGGAUGUAGCUCAAA | ACAAUUUGAGCUUCAU | Cleava |   |
| 3       | 904    | 3   | 2 | 1 | 20 | 344 | 363 | UGGU             | CUUC             | ge     | 1 |
| trf_1_1 | Bra025 | 17. |   |   |    |     |     | GGGGAUGUAGCUCAAA | ACAAUUUGAGCUUCAU | Cleava |   |
| 16      | 904    | 3   | 2 | 1 | 20 | 344 | 363 | UGGU             | CUUC             | ge     | 1 |
| trf_1_1 | Bra025 | 17. |   |   |    |     |     | GGGGAUGUAGCUCAAA | ACAAUUUGAGCUUCAU | Cleava |   |
| 17      | 904    | 3   | 2 | 1 | 20 | 344 | 363 | UGGU             | CUUC             | ge     | 1 |
| trf_1_1 | Bra025 | 17. |   |   |    |     |     | GGGGAUGUAGCUCAAA | ACAAUUUGAGCUUCAU | Cleava |   |
| 18      | 904    | 3   | 2 | 1 | 20 | 344 | 363 | UGGU             | CUUC             | ge     | 1 |
| trf_1_1 | Bra025 | 17. |   |   |    |     |     | GGGGAUGUAGCUCAAA | ACAAUUUGAGCUUCAU | Cleava |   |
| 21      | 904    | 3   | 2 | 1 | 20 | 344 | 363 | UGGU             | CUUC             | ge     | 1 |
| trf_1_1 | Bra025 | 17. |   |   |    |     |     | GGGGAUGUAGCUCAAA | ACAAUUUGAGCUUCAU | Cleava |   |
| 22      | 904    | 3   | 2 | 1 | 20 | 344 | 363 | UGGU             | CUUC             | ge     | 1 |
| trf_1_1 | Bra025 | 17. |   |   |    |     |     | GGGGAUGUAGCUCAAA | ACAAUUUGAGCUUCAU | Cleava |   |
| 29      | 904    | 3   | 2 | 1 | 20 | 344 | 363 | UGGU             | CUUC             | ge     | 1 |
| trf_1_1 | Bra025 | 17. |   |   |    |     |     | GGGGAUGUAGCUCAAA | ACAAUUUGAGCUUCAU | Cleava |   |
| 30      | 904    | 3   | 2 | 1 | 20 | 344 | 363 | UGGU             | CUUC             | ge     | 1 |
| trf_1_3 | Bra025 | 17. |   |   |    |     |     | GGGGAUGUAGCUCAAA | ACAAUUUGAGCUUCAU | Cleava |   |
| 36      | 904    | 3   | 2 | 1 | 20 | 344 | 363 | UGGU             | CUUC             | ge     | 1 |
| trf_1_3 | Bra025 | 17. |   |   |    |     |     | GGGGAUGUAGCUCAAA | ACAAUUUGAGCUUCAU | Cleava |   |
| 37      | 904    | 3   | 2 | 1 | 20 | 344 | 363 | UGGU             | CUUC             | ge     | 1 |
| trf_1_3 | Bra025 | 17. |   |   |    |     |     | GGGGAUGUAGCUCAAA | ACAAUUUGAGCUUCAU | Cleava |   |
| 67      | 904    | 3   | 2 | 1 | 20 | 344 | 363 | UGGU             | CUUC             | ge     | 1 |
| trf_1_3 | Bra025 | 17. |   |   |    |     |     | GGGGAUGUAGCUCAAA | ACAAUUUGAGCUUCAU | Cleava |   |
| 68      | 904    | 3   | 2 | 1 | 20 | 344 | 363 | UGGU             | CUUC             | ge     | 1 |
| trf_1_5 | Bra025 | 17. |   |   |    |     |     | GGGGAUGUAGCUCAAA | ACAAUUUGAGCUUCAU | Cleava |   |
| 17      | 904    | 3   | 2 | 1 | 20 | 344 | 363 | UGGU             | CUUC             | ge     | 1 |
| trf_1_5 | Bra025 | 17. |   |   |    |     |     | GGGGAUGUAGCUCAAA | ACAAUUUGAGCUUCAU | Cleava |   |
| 18      | 904    | 3   | 2 | 1 | 20 | 344 | 363 | UGGU             | CUUC             | ge     | 1 |
| trf_1_5 | Bra025 | 17. |   |   |    |     |     | GGGGAUGUAGCUCAAA | ACAAUUUGAGCUUCAU | Cleava |   |
| 19      | 904    | 3   | 2 | 1 | 20 | 344 | 363 | UGGU             | CUUC             | ge     | 1 |
| trf_1_5 | Bra025 | 17. |   |   |    |     |     | GGGGAUGUAGCUCAAA | ACAAUUUGAGCUUCAU | Cleava |   |
| 66      | 904    | 3   | 2 | 1 | 20 | 344 | 363 | UGGU             | CUUC             | ge     | 1 |

|         |        |     |     |   |    |      |      |                    |                  |             |   |
|---------|--------|-----|-----|---|----|------|------|--------------------|------------------|-------------|---|
| trf_1_5 | Bra025 | 17. |     |   |    |      |      | GGGGAUGUAGCUCAAA   | ACAAUUUGAGCUUCAU | Cleavage    |   |
| 67      | 904    | 3   | 2   | 1 | 20 | 344  | 363  | UGGU               | CUUC             |             | 1 |
| trf_1_5 | Bra025 | 17. |     |   |    |      |      | GGGGAUGUAGCUCAAA   | ACAAUUUGAGCUUCAU | Cleavage    |   |
| 68      | 904    | 3   | 2   | 1 | 20 | 344  | 363  | UGGU               | CUUC             |             | 1 |
| trf_1_2 | Bra026 | 24. |     |   |    |      |      | GGGUCGAUGCCCCGAGCG | CGCCGCUCGGGGAUCG | Translation |   |
| 08      | 093    | 3   | 7   | 1 | 20 | 454  | 473  | GAG                | ACUU             |             | 1 |
| trf_1_2 | Bra026 | 24. |     |   |    |      |      | GGGUCGAUGCCCCGAGCG | CGCCGCUCGGGGAUCG | Translation |   |
| 12      | 093    | 3   | 7   | 1 | 20 | 454  | 473  | GCU                | ACUU             |             | 1 |
| trf_1_1 | Bra027 | 22. |     |   |    |      |      | GCCGACUUAGCUCAGUG  | UACCACAGGGCGAAGU | Translation |   |
| 58      | 297    | 3   | 9   | 1 | 20 | 178  | 197  | GUA                | UGGC             |             | 1 |
| trf_1_3 | Bra027 | 22. |     |   |    |      |      | GCCGACUUAGCUCAGUG  | UACCACAGGGCGAAGU | Translation |   |
| 50      | 297    | 3   | 9   | 1 | 20 | 178  | 197  | GUA                | UGGC             |             | 1 |
| trf_1_2 | Bra027 | 22. |     |   |    |      |      | GGGUCGAUGCCCCGAGCG | UUCUGCUCGGCAUCG  | Cleavage    |   |
| 08      | 479    | 2.5 | 7   | 1 | 20 | 193  | 212  | GAG                | ACCU             |             | 1 |
| trf_1_2 | Bra027 | 22. |     |   |    |      |      | GGGUCGAUGCCCCGAGCG | UUCUGCUCGGCAUCG  | Cleavage    |   |
| 14      | 479    | 3   | 7   | 1 | 20 | 193  | 212  | GAU                | ACCU             |             | 1 |
| trf_1_2 | Bra027 | 22. |     |   |    |      |      | GGGUCGAUGCCCCGAGCG | UUCUGCUCGGCAUCG  | Cleavage    |   |
| 16      | 479    | 2.5 | 7   | 1 | 20 | 193  | 212  | GGA                | ACCU             |             | 1 |
| trf_1_2 | Bra027 | 22. |     |   |    |      |      | GGGUCGAUGCCCCGAGCG | UUCUGCUCGGCAUCG  | Cleavage    |   |
| 17      | 479    | 2   | 7   | 1 | 20 | 193  | 212  | GAA                | ACCU             |             | 1 |
| trf_1_2 | Bra027 | 22. |     |   |    |      |      | GGGUCGAUGCCCCGAGCG | UUCUGCUCGGCAUCG  | Cleavage    |   |
| 21      | 479    | 2   | 7   | 1 | 20 | 193  | 212  | GAA                | ACCU             |             | 1 |
| trf_1_4 | Bra028 | 17. |     |   |    |      |      | GGGAUCGUAGUUCAAU   | ACCCUUUGAACUAUGA | Cleavage    |   |
| 28      | 504    | 3   | 0   | 1 | 20 | 1007 | 1026 | UGGU               | UUCC             |             | 1 |
| trf_1_2 | Bra029 | 16. |     |   |    |      |      | GGGUCGAUGCCCCGAGCG | UUUUCGCUCGGGCCUU | Cleavage    |   |
| 17      | 587    | 3   | 1   | 1 | 21 | 1011 | 1031 | GAAA               | GACCG            |             | 1 |
| trf_1_2 | Bra029 | 16. |     |   |    |      |      | GGGUCGAUGCCCCGAGCG | UUUCGCUCGGGCCUUG | Cleavage    |   |
| 21      | 587    | 3   | 1   | 1 | 20 | 1012 | 1031 | GAA                | ACCG             |             | 1 |
| trf_1_5 | Bra029 | 20. |     |   |    |      |      | GCUGGAGUAGCUCAGU   | GGUCAGCUGAGCUACU | Cleavage    |   |
| 29      | 975    | 3   | 8   | 1 | 21 | 1244 | 1264 | UGGUU              | CAAGC            |             | 1 |
| trf_1_2 | Bra030 |     |     |   |    |      |      | GGGUCGAUGCCCCGAGCG | CUCCGCUCGCCGUCGA | Translation |   |
| 08      | 030    | 3   | 6.8 | 1 | 20 | 340  | 359  | GAG                | CUC              |             | 1 |
| trf_1_1 | Bra030 | 14. |     |   |    |      |      | GGGGAUAUAGCUCAGU   | UCCAAUUGAUCUUUAU | Translation |   |
| 4       | 524    | 3   | 1   | 1 | 20 | 2271 | 2290 | UGGG               | CCCC             |             | 1 |



|            |        |     |   |   |    |      |      |                   |                   |             |   |
|------------|--------|-----|---|---|----|------|------|-------------------|-------------------|-------------|---|
| trf_1_8    | Bra032 | 22. |   |   |    |      |      | UCCGUUAUCGUCCAGCG | GACGGCUUGACGAUGA  | Cleavage    | 1 |
|            | 111    | 3   | 4 | 1 | 20 | 727  | 746  | GUU               | CGGA              |             |   |
| trf_1_9    | Bra032 | 22. |   |   |    |      |      | UCCGUUAUCGUCCAGCG | GACGGCUUGACGAUGA  | Cleavage    | 1 |
|            | 111    | 3   | 4 | 1 | 20 | 727  | 746  | GUU               | CGGA              |             |   |
| trf_1_10   | Bra032 | 22. |   |   |    |      |      | UCCGUUAUCGUCCAGCG | GACGGCUUGACGAUGA  | Cleavage    | 1 |
|            | 111    | 3   | 4 | 1 | 20 | 727  | 746  | GUU               | CGGA              |             |   |
| trf_1_231  | Bra032 | 22. |   |   |    |      |      | UCCGUUAUCGUCCAGCG | GACGGCUUGACGAUGA  | Cleavage    | 1 |
|            | 111    | 3   | 4 | 1 | 20 | 727  | 746  | GUU               | CGGA              |             |   |
| trf_1_232  | Bra032 | 22. |   |   |    |      |      | UCCGUUAUCGUCCAGCG | GACGGCUUGACGAUGA  | Cleavage    | 1 |
|            | 111    | 3   | 4 | 1 | 20 | 727  | 746  | GUU               | CGGA              |             |   |
| trf_1_529  | Bra032 | 22. |   |   |    |      |      | GCUGGAGUAGCUCAGU  | AUCGGCUGAGCCACUCC | Translation | 1 |
|            | 168    | 2.5 | 3 | 1 | 20 | 150  | 169  | UGGU              | AGC               |             |   |
| trf_1_580  | Bra033 | 19. |   |   |    |      |      | GGUUCAAAUCCUAUUG  | UGUCCAA-          | Cleavage    | 1 |
|            | 006    | 3   | 3 | 1 | 20 | 787  | 805  | GACG              | AGGGUUUGAACC      |             |   |
| trf_1_258  | Bra033 | 18. |   |   |    |      |      | AUCAGAGUGGCGCAGCG | UUACGUUGCACCACUU  | Translation | 1 |
|            | 352    | 3   | 3 | 1 | 25 | 586  | 609  | GAAGCGUG          | UGAU              |             |   |
| trf_1_569  | Bra033 | 18. |   |   |    |      |      | AUCAGAGUGGCGCAGCG | UUACGUUGCACCACUU  | Translation | 1 |
|            | 352    | 3   | 3 | 1 | 25 | 586  | 609  | GAAGCGUG          | UGAU              |             |   |
| trf_1_2370 | Bra033 | 21. |   |   |    |      |      | GGGGAUGUAGCUCAAA  | ACCCUUUGGGUAACAU  | Translation | 1 |
|            | 370    | 3   | 6 | 1 | 20 | 4750 | 4769 | UGGU              | CCCC              |             |   |
| trf_1_3370 | Bra033 | 21. |   |   |    |      |      | GGGGAUGUAGCUCAAA  | CUGGACCCUUUGGGUA  | Translation | 1 |
|            | 370    | 3   | 6 | 1 | 24 | 4746 | 4769 | UGGUAGAG          | ACAUCCCC          |             |   |
| trf_1_5370 | Bra033 | 21. |   |   |    |      |      | GGGGAUGUAGCUCAAA  | ACCCUUUGGGUAACAU  | Translation | 1 |
|            | 370    | 3   | 6 | 1 | 20 | 4750 | 4769 | UGGU              | CCCC              |             |   |
| trf_1_6370 | Bra033 | 21. |   |   |    |      |      | GGGGAUGUAGCUCAAA  | ACCCUUUGGGUAACAU  | Translation | 1 |
|            | 370    | 3   | 6 | 1 | 20 | 4750 | 4769 | UGGU              | CCCC              |             |   |
| trf_1_19   | Bra033 | 21. |   |   |    |      |      | GGGGAUGUAGCUCAAA  | ACCCUUUGGGUAACAU  | Translation | 1 |
|            | 370    | 3   | 6 | 1 | 20 | 4750 | 4769 | UGGU              | CCCC              |             |   |
| trf_1_20   | Bra033 | 21. |   |   |    |      |      | GGGGAUGUAGCUCAAA  | ACCCUUUGGGUAACAU  | Translation | 1 |
|            | 370    | 3   | 6 | 1 | 20 | 4750 | 4769 | UGGU              | CCCC              |             |   |
| trf_1_29   | Bra033 | 21. |   |   |    |      |      | GGGGAUGUAGCUCAAA  | ACCCUUUGGGUAACAU  | Translation | 1 |
|            | 370    | 3   | 6 | 1 | 20 | 4750 | 4769 | UGGU              | CCCC              |             |   |

|         |        |     |   |    |      |      |                  |                  |        |   |
|---------|--------|-----|---|----|------|------|------------------|------------------|--------|---|
| trf_1_3 | Bra033 | 21. |   |    |      |      | GGGGAUGUAGCUCAAA | ACCCUUUGGGUAACAU | Transl |   |
| 0       | 370    | 3 6 | 1 | 20 | 4750 | 4769 | UGGU             | CCCC             | ation  | 1 |
| trf_1_7 | Bra033 | 21. |   |    |      |      | GGGGAUGUAGCUCAAA | ACCCUUUGGGUAACAU | Transl |   |
| 2       | 370    | 3 6 | 1 | 20 | 4750 | 4769 | UGGU             | CCCC             | ation  | 1 |
| trf_1_7 | Bra033 | 21. |   |    |      |      | GGGGAUGUAGCUCAAA | ACCCUUUGGGUAACAU | Transl |   |
| 3       | 370    | 3 6 | 1 | 20 | 4750 | 4769 | UGGU             | CCCC             | ation  | 1 |
| trf_1_1 | Bra033 | 21. |   |    |      |      | GGGGAUGUAGCUCAAA | ACCCUUUGGGUAACAU | Transl |   |
| 16      | 370    | 3 6 | 1 | 20 | 4750 | 4769 | UGGU             | CCCC             | ation  | 1 |
| trf_1_1 | Bra033 | 21. |   |    |      |      | GGGGAUGUAGCUCAAA | ACCCUUUGGGUAACAU | Transl |   |
| 17      | 370    | 3 6 | 1 | 20 | 4750 | 4769 | UGGU             | CCCC             | ation  | 1 |
| trf_1_1 | Bra033 | 21. |   |    |      |      | GGGGAUGUAGCUCAAA | CUGGACCCUUUGGGUA | Transl |   |
| 18      | 370    | 3 6 | 1 | 24 | 4746 | 4769 | UGGUAGAG         | ACAUCCCC         | ation  | 1 |
| trf_1_1 | Bra033 | 21. |   |    |      |      | GGGGAUGUAGCUCAAA | ACCCUUUGGGUAACAU | Transl |   |
| 21      | 370    | 3 6 | 1 | 20 | 4750 | 4769 | UGGU             | CCCC             | ation  | 1 |
| trf_1_1 | Bra033 | 21. |   |    |      |      | GGGGAUGUAGCUCAAA | ACCCUUUGGGUAACAU | Transl |   |
| 22      | 370    | 3 6 | 1 | 20 | 4750 | 4769 | UGGU             | CCCC             | ation  | 1 |
| trf_1_1 | Bra033 | 21. |   |    |      |      | GGGGAUGUAGCUCAAA | ACCCUUUGGGUAACAU | Transl |   |
| 29      | 370    | 3 6 | 1 | 20 | 4750 | 4769 | UGGU             | CCCC             | ation  | 1 |
| trf_1_1 | Bra033 | 21. |   |    |      |      | GGGGAUGUAGCUCAAA | ACCCUUUGGGUAACAU | Transl |   |
| 30      | 370    | 3 6 | 1 | 20 | 4750 | 4769 | UGGU             | CCCC             | ation  | 1 |
| trf_1_3 | Bra033 | 21. |   |    |      |      | GGGGAUGUAGCUCAAA | ACCCUUUGGGUAACAU | Transl |   |
| 36      | 370    | 3 6 | 1 | 20 | 4750 | 4769 | UGGU             | CCCC             | ation  | 1 |
| trf_1_3 | Bra033 | 21. |   |    |      |      | GGGGAUGUAGCUCAAA | ACCCUUUGGGUAACAU | Transl |   |
| 37      | 370    | 3 6 | 1 | 20 | 4750 | 4769 | UGGU             | CCCC             | ation  | 1 |
| trf_1_3 | Bra033 | 21. |   |    |      |      | GGGGAUGUAGCUCAAA | ACCCUUUGGGUAACAU | Transl |   |
| 67      | 370    | 3 6 | 1 | 20 | 4750 | 4769 | UGGU             | CCCC             | ation  | 1 |
| trf_1_3 | Bra033 | 21. |   |    |      |      | GGGGAUGUAGCUCAAA | CUGGACCCUUUGGGUA | Transl |   |
| 68      | 370    | 3 6 | 1 | 24 | 4746 | 4769 | UGGUAGAG         | ACAUCCCC         | ation  | 1 |
| trf_1_5 | Bra033 | 21. |   |    |      |      | GGGGAUGUAGCUCAAA | ACCCUUUGGGUAACAU | Transl |   |
| 17      | 370    | 3 6 | 1 | 20 | 4750 | 4769 | UGGU             | CCCC             | ation  | 1 |
| trf_1_5 | Bra033 | 21. |   |    |      |      | GGGGAUGUAGCUCAAA | CUGGACCCUUUGGGUA | Transl |   |
| 18      | 370    | 3 6 | 1 | 24 | 4746 | 4769 | UGGUAGAG         | ACAUCCCC         | ation  | 1 |
| trf_1_5 | Bra033 | 21. |   |    |      |      | GGGGAUGUAGCUCAAA | ACCCUUUGGGUAACAU | Transl |   |
| 19      | 370    | 3 6 | 1 | 20 | 4750 | 4769 | UGGU             | CCCC             | ation  | 1 |

|         |        |     |   |   |    |      |      |                   |                  |        |   |
|---------|--------|-----|---|---|----|------|------|-------------------|------------------|--------|---|
| trf_1_5 | Bra033 | 21. |   |   |    |      |      | GGGGAUGUAGCUCAAA  | ACCCUUUGGGUAACAU | Transl |   |
| 66      | 370    | 3   | 6 | 1 | 20 | 4750 | 4769 | UGGU              | CCCC             | ation  | 1 |
| trf_1_5 | Bra033 | 21. |   |   |    |      |      | GGGGAUGUAGCUCAAA  | CUGGACCCUUUGGGUA | Transl |   |
| 67      | 370    | 3   | 6 | 1 | 24 | 4746 | 4769 | UGGUAGAG          | ACAUCCCC         | ation  | 1 |
| trf_1_5 | Bra033 | 21. |   |   |    |      |      | GGGGAUGUAGCUCAAA  | ACCCUUUGGGUAACAU | Transl |   |
| 68      | 370    | 3   | 6 | 1 | 20 | 4750 | 4769 | UGGU              | CCCC             | ation  | 1 |
| trf_1_1 | Bra033 | 24. |   |   |    |      |      | CCGACCUUAGCUCAGUU | UCAACCAACGGAGUUG | Cleava |   |
| 82      | 405    | 3   | 4 | 1 | 23 | 30   | 52   | GGUAGA            | GGGUUGG          | ge     | 1 |
| trf_1_4 | Bra033 | 24. |   |   |    |      |      | CCGACCUUAGCUCAGUU | UCAACCAACGGAGUUG | Cleava |   |
| 76      | 405    | 3   | 4 | 1 | 23 | 30   | 52   | GGUAGA            | GGGUUGG          | ge     | 1 |
| trf_1_4 | Bra033 | 24. |   |   |    |      |      | CCGACCUUAGCUCAGUU | UCAACCAACGGAGUUG | Cleava |   |
| 78      | 405    | 3   | 4 | 1 | 23 | 30   | 52   | GGUAGA            | GGGUUGG          | ge     | 1 |
| trf_1_4 | Bra033 | 24. |   |   |    |      |      | CCGACCUUAGCUCAGUU | UCAACCAACGGAGUUG | Cleava |   |
| 79      | 405    | 3   | 4 | 1 | 23 | 30   | 52   | GGUAGA            | GGGUUGG          | ge     | 1 |
| trf_1_5 | Bra033 | 24. |   |   |    |      |      | CCGACCUUAGCUCAGUU | UCAACCAACGGAGUUG | Cleava |   |
| 20      | 405    | 3   | 4 | 1 | 23 | 30   | 52   | GGUAGA            | GGGUUGG          | ge     | 1 |
| trf_1_1 | Bra033 | 24. |   |   |    |      |      | CCGACCUUAGCUCAGUU | UCAACCAACGGAGUUG | Cleava |   |
| 82      | 406    | 3   | 4 | 1 | 23 | 30   | 52   | GGUAGA            | GGGUUGG          | ge     | 1 |
| trf_1_4 | Bra033 | 24. |   |   |    |      |      | CCGACCUUAGCUCAGUU | UCAACCAACGGAGUUG | Cleava |   |
| 76      | 406    | 3   | 4 | 1 | 23 | 30   | 52   | GGUAGA            | GGGUUGG          | ge     | 1 |
| trf_1_4 | Bra033 | 24. |   |   |    |      |      | CCGACCUUAGCUCAGUU | UCAACCAACGGAGUUG | Cleava |   |
| 78      | 406    | 3   | 4 | 1 | 23 | 30   | 52   | GGUAGA            | GGGUUGG          | ge     | 1 |
| trf_1_4 | Bra033 | 24. |   |   |    |      |      | CCGACCUUAGCUCAGUU | UCAACCAACGGAGUUG | Cleava |   |
| 79      | 406    | 3   | 4 | 1 | 23 | 30   | 52   | GGUAGA            | GGGUUGG          | ge     | 1 |
| trf_1_5 | Bra033 | 24. |   |   |    |      |      | CCGACCUUAGCUCAGUU | UCAACCAACGGAGUUG | Cleava |   |
| 20      | 406    | 3   | 4 | 1 | 23 | 30   | 52   | GGUAGA            | GGGUUGG          | ge     | 1 |
| trf_1_4 | Bra033 | 10. |   |   |    |      |      | GGGAUUGUAGUUCAAU  | ACCGAUUGAUCAGCAA | Transl |   |
| 13      | 536    | 3   | 5 | 1 | 20 | 426  | 445  | CGGU              | UUCC             | ation  | 1 |
| trf_1_4 | Bra033 | 10. |   |   |    |      |      | GGGAUUGUAGUUCAAU  | ACCGAUUGAUCAGCAA | Transl |   |
| 36      | 536    | 3   | 5 | 1 | 20 | 426  | 445  | CGGU              | UUCC             | ation  | 1 |
| trf_1_4 | Bra033 | 10. |   |   |    |      |      | GGGAUUGUAGUUCAAU  | ACCGAUUGAUCAGCAA | Transl |   |
| 54      | 536    | 3   | 5 | 1 | 20 | 426  | 445  | CGGU              | UUCC             | ation  | 1 |
| trf_1_4 | Bra033 | 10. |   |   |    |      |      | GGGAUUGUAGUUCAAU  | ACCGAUUGAUCAGCAA | Transl |   |
| 59      | 536    | 3   | 5 | 1 | 20 | 426  | 445  | CGGU              | UUCC             | ation  | 1 |

|         |        |     |     |   |    |      |      |                  |                   |        |   |
|---------|--------|-----|-----|---|----|------|------|------------------|-------------------|--------|---|
| trf_1_5 | Bra034 | 21. |     |   |    |      |      | UUAGGUUCAAUCCUA  | UGCGAUAGGAUUUGGA  | Cleava |   |
| 77      | 278    | 3   | 9   | 1 | 21 | 2430 | 2450 | UUGGA            | CCUGG             | ge     | 1 |
| trf_1_5 | Bra034 | 22. |     |   |    |      |      | AGGUUCAAUCCUAUU  | CUGCGAUAGGAUUUGG  | Cleava |   |
| 78      | 278    | 3   | 4   | 1 | 20 | 2429 | 2448 | GGAC             | ACCU              | ge     | 1 |
| trf_1_5 | Bra034 | 22. |     |   |    |      |      | UAGGUUCAAUCCUAU  | UGCGAUAGGAUUUGGA  | Cleava |   |
| 79      | 278    | 2.5 | 3   | 1 | 20 | 2430 | 2449 | UGGA             | CCUG              | ge     | 1 |
| trf_1_4 | Bra034 |     |     |   |    |      |      | GGGAUUGUAGUUCAAU | CCUAAUUAACCACAAU  | Transl |   |
| 33      | 571    | 3   | 9.0 | 1 | 20 | 52   | 71   | UGGG             | CUC               | ation  | 1 |
| trf_1_4 | Bra034 |     |     |   |    |      |      | GGGAUUGUAGUUCAAU | CCUAAUUAACCACAAU  | Transl |   |
| 41      | 571    | 3   | 9.0 | 1 | 20 | 52   | 71   | UGGG             | CUC               | ation  | 1 |
| trf_1_4 | Bra034 |     |     |   |    |      |      | GGGAUUGUAGUUCAAU | CCUAAUUAACCACAAU  | Transl |   |
| 42      | 571    | 3   | 9.0 | 1 | 20 | 52   | 71   | UGGG             | CUC               | ation  | 1 |
| trf_1_4 | Bra034 | 11. |     |   |    |      |      | GGGAUUGUAGUUCAAU | UCCAAAUGAGCAGCAAU | Transl |   |
| 18      | 753    | 3   | 6   | 1 | 20 | 443  | 462  | UGGA             | CCC               | ation  | 1 |
| trf_1_4 | Bra034 | 11. |     |   |    |      |      | GGGAUUGUAGUUCAAU | UCCAAAUGAGCAGCAAU | Transl |   |
| 19      | 753    | 3   | 6   | 1 | 20 | 443  | 462  | UGGA             | CCC               | ation  | 1 |
| trf_1_4 | Bra034 | 11. |     |   |    |      |      | GGGAUUGUAGUUCAAU | UCCAAAUGAGCAGCAAU | Transl |   |
| 34      | 753    | 3   | 6   | 1 | 20 | 443  | 462  | UGGA             | CCC               | ation  | 1 |
| trf_1_4 | Bra034 | 11. |     |   |    |      |      | GGGAUUGUAGUUCAAU | UAUCCAAAUGAGCAGCA | Transl |   |
| 45      | 753    | 3   | 6   | 1 | 22 | 441  | 462  | UGGAAA           | AUCCC             | ation  | 1 |
| trf_1_4 | Bra034 | 11. |     |   |    |      |      | GGGAUUGUAGUUCAAU | AUCCAAAUGAGCAGCAA | Transl |   |
| 47      | 753    | 3   | 6   | 1 | 21 | 442  | 462  | UGGAU            | UCCC              | ation  | 1 |
| trf_1_4 | Bra034 | 11. |     |   |    |      |      | GGGAUUGUAGUUCAAU | UAUCCAAAUGAGCAGCA | Transl |   |
| 56      | 753    | 3   | 6   | 1 | 22 | 441  | 462  | UGGAGA           | AUCCC             | ation  | 1 |
| trf_1_4 | Bra034 | 11. |     |   |    |      |      | GGGAUUGUAGUUCAAU | UCCAAAUGAGCAGCAAU | Transl |   |
| 65      | 753    | 3   | 6   | 1 | 20 | 443  | 462  | UGGA             | CCC               | ation  | 1 |
|         | Bra035 | 10. |     |   |    |      |      | GUCGUUGUAGUAUAGU | UACCACAAUACUUCAAC | Cleava |   |
| trf_1_1 | 409    | 3   | 4   | 1 | 20 | 1328 | 1347 | GGUA             | GAG               | ge     | 1 |
| trf_1_2 | Bra035 | 10. |     |   |    |      |      | GUCGUUGUAGUAUAGU | UACCACAAUACUUCAAC | Cleava |   |
| 4       | 409    | 3   | 4   | 1 | 20 | 1328 | 1347 | GGUA             | GAG               | ge     | 1 |
| trf_1_2 | Bra035 | 10. |     |   |    |      |      | GUCGUUGUAGUAUAGU | UACCACAAUACUUCAAC | Cleava |   |
| 5       | 409    | 3   | 4   | 1 | 20 | 1328 | 1347 | GGUA             | GAG               | ge     | 1 |
| trf_1_2 | Bra035 | 10. |     |   |    |      |      | GUCGUUGUAGUAUAGU | UACCACAAUACUUCAAC | Cleava |   |
| 6       | 409    | 3   | 4   | 1 | 20 | 1328 | 1347 | GGUA             | GAG               | ge     | 1 |

|         |        |     |   |   |    |      |      |                  |                   |        |   |
|---------|--------|-----|---|---|----|------|------|------------------|-------------------|--------|---|
| trf_1_5 | Bra035 | 10. |   |   |    |      |      | GUCGUUGUAGUAUAGU | UACCACAAUACUUCAAC | Cleava |   |
| 0       | 409    | 3   | 4 | 1 | 20 | 1328 | 1347 | GGUA             | GAG               | ge     | 1 |
| trf_1_5 | Bra035 | 10. |   |   |    |      |      | GUCGUUGUAGUAUAGU | UACCACAAUACUUCAAC | Cleava |   |
| 2       | 409    | 3   | 4 | 1 | 20 | 1328 | 1347 | GGUA             | GAG               | ge     | 1 |
| trf_1_5 | Bra035 | 10. |   |   |    |      |      | GUCGUUGUAGUAUAGU | UACCACAAUACUUCAAC | Cleava |   |
| 3       | 409    | 3   | 4 | 1 | 20 | 1328 | 1347 | GGUA             | GAG               | ge     | 1 |
| trf_1_6 | Bra035 | 10. |   |   |    |      |      | GUCGUUGUAGUAUAGU | UACCACAAUACUUCAAC | Cleava |   |
| 5       | 409    | 3   | 4 | 1 | 20 | 1328 | 1347 | GGUA             | GAG               | ge     | 1 |
| trf_1_6 | Bra035 | 10. |   |   |    |      |      | GUCGUUGUAGUAUAGU | UACCACAAUACUUCAAC | Cleava |   |
| 6       | 409    | 3   | 4 | 1 | 20 | 1328 | 1347 | GGUA             | GAG               | ge     | 1 |
| trf_1_6 | Bra035 | 10. |   |   |    |      |      | GUCGUUGUAGUAUAGU | UACCACAAUACUUCAAC | Cleava |   |
| 7       | 409    | 3   | 4 | 1 | 20 | 1328 | 1347 | GGUA             | GAG               | ge     | 1 |
| trf_1_1 | Bra035 | 10. |   |   |    |      |      | GUCGUUGUAGUAUAGU | UACCACAAUACUUCAAC | Cleava |   |
| 25      | 409    | 3   | 4 | 1 | 20 | 1328 | 1347 | GGUA             | GAG               | ge     | 1 |
| trf_1_1 | Bra035 | 10. |   |   |    |      |      | GUCGUUGUAGUAUAGU | UACCACAAUACUUCAAC | Cleava |   |
| 31      | 409    | 3   | 4 | 1 | 20 | 1328 | 1347 | GGUA             | GAG               | ge     | 1 |
| trf_1_1 | Bra035 | 10. |   |   |    |      |      | GUCGUUGUAGUAUAGU | UACCACAAUACUUCAAC | Cleava |   |
| 32      | 409    | 3   | 4 | 1 | 20 | 1328 | 1347 | GGUA             | GAG               | ge     | 1 |
| trf_1_2 | Bra035 | 10. |   |   |    |      |      | GUCGUUGUAGUAUAGU | UACCACAAUACUUCAAC | Cleava |   |
| 30      | 409    | 3   | 4 | 1 | 20 | 1328 | 1347 | GGUA             | GAG               | ge     | 1 |
| trf_1_2 | Bra035 | 10. |   |   |    |      |      | GUCGUUGUAGUAUAGU | UACCACAAUACUUCAAC | Cleava |   |
| 57      | 409    | 3   | 4 | 1 | 20 | 1328 | 1347 | GGUA             | GAG               | ge     | 1 |
| trf_1_2 | Bra035 | 10. |   |   |    |      |      | GUCGUUGUAGUAUAGU | UACCACAAUACUUCAAC | Cleava |   |
| 81      | 409    | 3   | 4 | 1 | 20 | 1328 | 1347 | GGUA             | GAG               | ge     | 1 |
| trf_1_2 | Bra035 | 10. |   |   |    |      |      | GUCGUUGUAGUAUAGU | UACCACAAUACUUCAAC | Cleava |   |
| 82      | 409    | 3   | 4 | 1 | 20 | 1328 | 1347 | GGUA             | GAG               | ge     | 1 |
| trf_1_3 | Bra035 | 10. |   |   |    |      |      | GUCGUUGUAGUAUAGU | UACCACAAUACUUCAAC | Cleava |   |
| 06      | 409    | 3   | 4 | 1 | 20 | 1328 | 1347 | GGUA             | GAG               | ge     | 1 |
| trf_1_3 | Bra035 | 10. |   |   |    |      |      | GUCGUUGUAGUAUAGU | UACCACAAUACUUCAAC | Cleava |   |
| 31      | 409    | 3   | 4 | 1 | 20 | 1328 | 1347 | GGUA             | GAG               | ge     | 1 |
| trf_1_3 | Bra035 | 10. |   |   |    |      |      | GUCGUUGUAGUAUAGU | UACCACAAUACUUCAAC | Cleava |   |
| 72      | 409    | 3   | 4 | 1 | 20 | 1328 | 1347 | GGUA             | GAG               | ge     | 1 |
| trf_1_3 | Bra035 | 10. |   |   |    |      |      | GUCGUUGUAGUAUAGU | UACCACAAUACUUCAAC | Cleava |   |
| 73      | 409    | 3   | 4 | 1 | 20 | 1328 | 1347 | GGUA             | GAG               | ge     | 1 |

|         |        |     |   |   |    |      |      |                  |                   |        |   |
|---------|--------|-----|---|---|----|------|------|------------------|-------------------|--------|---|
| trf_1_3 | Bra035 | 10. |   |   |    |      |      | GUCGUUGUAGUAUAGU | UACCACAAUACUUCAAC | Cleava |   |
| 74      | 409    | 3   | 4 | 1 | 20 | 1328 | 1347 | GGUA             | GAG               | ge     | 1 |
| trf_1_3 | Bra035 | 10. |   |   |    |      |      | GUCGUUGUAGUAUAGU | UACCACAAUACUUCAAC | Cleava |   |
| 90      | 409    | 3   | 4 | 1 | 20 | 1328 | 1347 | GGUA             | GAG               | ge     | 1 |
| trf_1_3 | Bra035 | 10. |   |   |    |      |      | GUCGUUGUAGUAUAGU | UACCACAAUACUUCAAC | Cleava |   |
| 99      | 409    | 3   | 4 | 1 | 20 | 1328 | 1347 | GGUA             | GAG               | ge     | 1 |
| trf_1_5 | Bra035 | 10. |   |   |    |      |      | GUCGUUGUAGUAUAGU | UACCACAAUACUUCAAC | Cleava |   |
| 24      | 409    | 3   | 4 | 1 | 20 | 1328 | 1347 | GGUA             | GAG               | ge     | 1 |
| trf_1_5 | Bra035 | 10. |   |   |    |      |      | GUCGUUGUAGUAUAGU | UACCACAAUACUUCAAC | Cleava |   |
| 32      | 409    | 3   | 4 | 1 | 20 | 1328 | 1347 | GGUA             | GAG               | ge     | 1 |
| trf_1_5 | Bra035 | 10. |   |   |    |      |      | GUCGUUGUAGUAUAGU | UACCACAAUACUUCAAC | Cleava |   |
| 76      | 409    | 3   | 4 | 1 | 20 | 1328 | 1347 | GGUA             | GAG               | ge     | 1 |
| trf_1_5 | Bra036 | 17. |   |   |    |      |      | AGGUUCAAUCCUAUU  | GAGUCCAAUGUGGUUU  | Cleava |   |
| 78      | 447    | 2.5 | 4 | 1 | 22 | 804  | 825  | GGACGC           | GAGCCU            | ge     | 1 |
| trf_1_3 | Bra036 | 20. |   |   |    |      |      | GGGGAUGUAGCUCAGA | UCGACUGGCUGAGCUA  | Cleava |   |
| 1       | 771    | 3   | 2 | 1 | 23 | 5375 | 5397 | UGGUAGA          | CAUUCCU           | ge     | 1 |
| trf_1_3 | Bra036 | 20. |   |   |    |      |      | GGGGAUGUAGCUCAGA | ACUGGCUGAGCUACAU  | Cleava |   |
| 5       | 771    | 3   | 2 | 1 | 20 | 5378 | 5397 | UGGU             | UCCU              | ge     | 1 |
| trf_1_6 | Bra036 | 20. |   |   |    |      |      | GGGGAUGUAGCUCAGA | UCGACUGGCUGAGCUA  | Cleava |   |
| 0       | 771    | 3   | 2 | 1 | 23 | 5375 | 5397 | UGGUAGA          | CAUUCCU           | ge     | 1 |
| trf_1_6 | Bra036 | 20. |   |   |    |      |      | GGGGAUGUAGCUCAGA | CUCGACUGGCUGAGCU  | Cleava |   |
| 2       | 771    | 3   | 2 | 1 | 24 | 5374 | 5397 | UGGUAGAG         | ACAUUCCU          | ge     | 1 |
| trf_1_9 | Bra036 | 20. |   |   |    |      |      | GGGGAUGUAGCUCAGA | UCGACUGGCUGAGCUA  | Cleava |   |
| 0       | 771    | 3   | 2 | 1 | 23 | 5375 | 5397 | UGGUAGA          | CAUUCCU           | ge     | 1 |
| trf_1_1 | Bra036 | 20. |   |   |    |      |      | GGGGAUGUAGCUCAGA | UCGACUGGCUGAGCUA  | Cleava |   |
| 33      | 771    | 3   | 2 | 1 | 23 | 5375 | 5397 | UGGUAGA          | CAUUCCU           | ge     | 1 |
| trf_1_1 | Bra036 | 20. |   |   |    |      |      | GGGGAUGUAGCUCAGA | ACUGGCUGAGCUACAU  | Cleava |   |
| 37      | 771    | 3   | 2 | 1 | 20 | 5378 | 5397 | UGGU             | UCCU              | ge     | 1 |
| trf_1_1 | Bra036 | 20. |   |   |    |      |      | GGGGAUGUAGCUCAGA | ACUGGCUGAGCUACAU  | Cleava |   |
| 38      | 771    | 3   | 2 | 1 | 20 | 5378 | 5397 | UGGU             | UCCU              | ge     | 1 |
| trf_1_1 | Bra036 | 20. |   |   |    |      |      | GGGGAUGUAGCUCAGA | UCGACUGGCUGAGCUA  | Cleava |   |
| 53      | 771    | 3   | 2 | 1 | 23 | 5375 | 5397 | UGGUAGA          | CAUUCCU           | ge     | 1 |
| trf_1_1 | Bra036 | 20. |   |   |    |      |      | GGGGAUGUAGCUCAGA | CUCGACUGGCUGAGCU  | Cleava |   |
| 54      | 771    | 3   | 2 | 1 | 24 | 5374 | 5397 | UGGUAGAG         | ACAUUCCU          | ge     | 1 |

|         |        |     |   |   |    |      |      |                  |                  |        |   |
|---------|--------|-----|---|---|----|------|------|------------------|------------------|--------|---|
| trf_1_1 | Bra036 | 20. |   |   |    |      |      | GGGGAUGUAGCUCAGA | UCGACUGGCUGAGCUA | Cleava |   |
| 60      | 771    | 3   | 2 | 1 | 23 | 5375 | 5397 | UGGUAGA          | CAUUCCU          | ge     | 1 |
| trf_1_1 | Bra036 | 20. |   |   |    |      |      | GGGGAUGUAGCUCAGA | CUCGACUGGCUGAGCU | Cleava |   |
| 62      | 771    | 3   | 2 | 1 | 24 | 5374 | 5397 | UGGUAGAG         | ACAUUCCU         | ge     | 1 |
| trf_1_1 | Bra036 | 20. |   |   |    |      |      | GGGGAUGUAGCUCAGA | UCGACUGGCUGAGCUA | Cleava |   |
| 69      | 771    | 3   | 2 | 1 | 23 | 5375 | 5397 | UGGUAGA          | CAUUCCU          | ge     | 1 |
| trf_1_1 | Bra036 | 20. |   |   |    |      |      | GGGGAUGUAGCUCAGA | CUCGACUGGCUGAGCU | Cleava |   |
| 73      | 771    | 3   | 2 | 1 | 24 | 5374 | 5397 | UGGUAGAG         | ACAUUCCU         | ge     | 1 |
| trf_1_1 | Bra036 | 20. |   |   |    |      |      | GGGGAUGUAGCUCAGA | UCGACUGGCUGAGCUA | Cleava |   |
| 83      | 771    | 3   | 2 | 1 | 23 | 5375 | 5397 | UGGUAGA          | CAUUCCU          | ge     | 1 |
| trf_1_2 | Bra036 | 20. |   |   |    |      |      | GGGGAUGUAGCUCAGA | UCGACUGGCUGAGCUA | Cleava |   |
| 33      | 771    | 3   | 2 | 1 | 23 | 5375 | 5397 | UGGUAGA          | CAUUCCU          | ge     | 1 |
| trf_1_2 | Bra036 | 20. |   |   |    |      |      | GGGGAUGUAGCUCAGA | CUCGACUGGCUGAGCU | Cleava |   |
| 36      | 771    | 3   | 2 | 1 | 24 | 5374 | 5397 | UGGUAGAG         | ACAUUCCU         | ge     | 1 |
| trf_1_2 | Bra036 | 20. |   |   |    |      |      | GGGGAUGUAGCUCAGA | UCGACUGGCUGAGCUA | Cleava |   |
| 44      | 771    | 3   | 2 | 1 | 23 | 5375 | 5397 | UGGUAGA          | CAUUCCU          | ge     | 1 |
| trf_1_2 | Bra036 | 20. |   |   |    |      |      | GGGGAUGUAGCUCAGA | CUCGACUGGCUGAGCU | Cleava |   |
| 47      | 771    | 3   | 2 | 1 | 24 | 5374 | 5397 | UGGUAGAG         | ACAUUCCU         | ge     | 1 |
| trf_1_2 | Bra036 | 20. |   |   |    |      |      | GGGGAUGUAGCUCAGA | UCGACUGGCUGAGCUA | Cleava |   |
| 66      | 771    | 3   | 2 | 1 | 23 | 5375 | 5397 | UGGUAGA          | CAUUCCU          | ge     | 1 |
| trf_1_2 | Bra036 | 20. |   |   |    |      |      | GGGGAUGUAGCUCAGA | UCGACUGGCUGAGCUA | Cleava |   |
| 86      | 771    | 3   | 2 | 1 | 23 | 5375 | 5397 | UGGUAGA          | CAUUCCU          | ge     | 1 |
| trf_1_2 | Bra036 | 20. |   |   |    |      |      | GGGGAUGUAGCUCAGA | UCGACUGGCUGAGCUA | Cleava |   |
| 93      | 771    | 3   | 2 | 1 | 23 | 5375 | 5397 | UGGUAGA          | CAUUCCU          | ge     | 1 |
| trf_1_2 | Bra036 | 20. |   |   |    |      |      | GGGGAUGUAGCUCAGA | CUCGACUGGCUGAGCU | Cleava |   |
| 97      | 771    | 3   | 2 | 1 | 24 | 5374 | 5397 | UGGUAGAG         | ACAUUCCU         | ge     | 1 |
| trf_1_3 | Bra036 | 20. |   |   |    |      |      | GGGGAUGUAGCUCAGA | UCGACUGGCUGAGCUA | Cleava |   |
| 02      | 771    | 3   | 2 | 1 | 23 | 5375 | 5397 | UGGUAGA          | CAUUCCU          | ge     | 1 |
| trf_1_3 | Bra036 | 20. |   |   |    |      |      | GGGGAUGUAGCUCAGA | UCGACUGGCUGAGCUA | Cleava |   |
| 07      | 771    | 3   | 2 | 1 | 23 | 5375 | 5397 | UGGUAGA          | CAUUCCU          | ge     | 1 |
| trf_1_3 | Bra036 | 20. |   |   |    |      |      | GGGGAUGUAGCUCAGA | UCGACUGGCUGAGCUA | Cleava |   |
| 14      | 771    | 3   | 2 | 1 | 23 | 5375 | 5397 | UGGUAGA          | CAUUCCU          | ge     | 1 |
| trf_1_3 | Bra036 | 20. |   |   |    |      |      | GGGGAUGUAGCUCAGA | UCGACUGGCUGAGCUA | Cleava |   |
| 22      | 771    | 3   | 2 | 1 | 23 | 5375 | 5397 | UGGUAGA          | CAUUCCU          | ge     | 1 |

|         |        |     |   |   |    |      |      |                  |                  |        |   |
|---------|--------|-----|---|---|----|------|------|------------------|------------------|--------|---|
| trf_1_3 | Bra036 | 20. |   |   |    |      |      | GGGGAUGUAGCUCAGA | CUCGACUGGCUGAGCU | Cleava |   |
| 23      | 771    | 3   | 2 | 1 | 24 | 5374 | 5397 | UGGUAGAG         | ACAUUCCU         | ge     | 1 |
| trf_1_3 | Bra036 | 20. |   |   |    |      |      | GGGGAUGUAGCUCAGA | UCGACUGGCUGAGCUA | Cleava |   |
| 32      | 771    | 3   | 2 | 1 | 23 | 5375 | 5397 | UGGUAGA          | CAUUCCU          | ge     | 1 |
| trf_1_3 | Bra036 | 20. |   |   |    |      |      | GGGGAUGUAGCUCAGA | CUCGACUGGCUGAGCU | Cleava |   |
| 38      | 771    | 3   | 2 | 1 | 24 | 5374 | 5397 | UGGUAGAG         | ACAUUCCU         | ge     | 1 |
| trf_1_3 | Bra036 | 20. |   |   |    |      |      | GGGGAUGUAGCUCAGA | UCGACUGGCUGAGCUA | Cleava |   |
| 41      | 771    | 3   | 2 | 1 | 23 | 5375 | 5397 | UGGUAGA          | CAUUCCU          | ge     | 1 |
| trf_1_3 | Bra036 | 20. |   |   |    |      |      | GGGGAUGUAGCUCAGA | UCGACUGGCUGAGCUA | Cleava |   |
| 51      | 771    | 3   | 2 | 1 | 23 | 5375 | 5397 | UGGUAGA          | CAUUCCU          | ge     | 1 |
| trf_1_3 | Bra036 | 20. |   |   |    |      |      | GGGGAUGUAGCUCAGA | ACUGGCUGAGCUACAU | Cleava |   |
| 53      | 771    | 3   | 2 | 1 | 20 | 5378 | 5397 | UGGU             | UCCU             | ge     | 1 |
| trf_1_3 | Bra036 | 20. |   |   |    |      |      | GGGGAUGUAGCUCAGA | UCGACUGGCUGAGCUA | Cleava |   |
| 62      | 771    | 3   | 2 | 1 | 23 | 5375 | 5397 | UGGUAGA          | CAUUCCU          | ge     | 1 |
| trf_1_3 | Bra036 | 20. |   |   |    |      |      | GGGGAUGUAGCUCAGA | CUCGACUGGCUGAGCU | Cleava |   |
| 66      | 771    | 3   | 2 | 1 | 24 | 5374 | 5397 | UGGUAGAG         | ACAUUCCU         | ge     | 1 |
| trf_1_3 | Bra036 | 20. |   |   |    |      |      | GGGGAUGUAGCUCAGA | UCGACUGGCUGAGCUA | Cleava |   |
| 75      | 771    | 3   | 2 | 1 | 23 | 5375 | 5397 | UGGUAGA          | CAUUCCU          | ge     | 1 |
| trf_1_3 | Bra036 | 20. |   |   |    |      |      | GGGGAUGUAGCUCAGA | CUCGACUGGCUGAGCU | Cleava |   |
| 79      | 771    | 3   | 2 | 1 | 24 | 5374 | 5397 | UGGUAGAG         | ACAUUCCU         | ge     | 1 |
| trf_1_3 | Bra036 | 20. |   |   |    |      |      | GGGGAUGUAGCUCAGA | UCGACUGGCUGAGCUA | Cleava |   |
| 82      | 771    | 3   | 2 | 1 | 23 | 5375 | 5397 | UGGUAGA          | CAUUCCU          | ge     | 1 |
| trf_1_3 | Bra036 | 20. |   |   |    |      |      | GGGGAUGUAGCUCAGA | CUCGACUGGCUGAGCU | Cleava |   |
| 83      | 771    | 3   | 2 | 1 | 24 | 5374 | 5397 | UGGUAGAG         | ACAUUCCU         | ge     | 1 |
| trf_1_3 | Bra036 | 20. |   |   |    |      |      | GGGGAUGUAGCUCAGA | UCGACUGGCUGAGCUA | Cleava |   |
| 91      | 771    | 3   | 2 | 1 | 23 | 5375 | 5397 | UGGUAGA          | CAUUCCU          | ge     | 1 |
| trf_1_3 | Bra036 | 20. |   |   |    |      |      | GGGGAUGUAGCUCAGA | ACUGGCUGAGCUACAU | Cleava |   |
| 92      | 771    | 3   | 2 | 1 | 20 | 5378 | 5397 | UGGU             | UCCU             | ge     | 1 |
| trf_1_3 | Bra036 | 20. |   |   |    |      |      | GGGGAUGUAGCUCAGA | CUCGACUGGCUGAGCU | Cleava |   |
| 93      | 771    | 3   | 2 | 1 | 24 | 5374 | 5397 | UGGUAGAG         | ACAUUCCU         | ge     | 1 |
| trf_1_4 | Bra036 | 20. |   |   |    |      |      | GGGGAUGUAGCUCAGA | UCGACUGGCUGAGCUA | Cleava |   |
| 00      | 771    | 3   | 2 | 1 | 23 | 5375 | 5397 | UGGUAGA          | CAUUCCU          | ge     | 1 |
| trf_1_4 | Bra036 | 20. |   |   |    |      |      | GGGGAUGUAGCUCAGA | ACUGGCUGAGCUACAU | Cleava |   |
| 04      | 771    | 3   | 2 | 1 | 20 | 5378 | 5397 | UGGU             | UCCU             | ge     | 1 |



|               |               |          |   |   |    |      |      |                             |                             |                 |   |
|---------------|---------------|----------|---|---|----|------|------|-----------------------------|-----------------------------|-----------------|---|
| trf_1_4<br>08 | Bra036<br>771 | 20.<br>3 | 2 | 1 | 23 | 5375 | 5397 | GGGGAUGUAGCUCAGA<br>UGGUAGA | UCGACUGGCUGAGCUA<br>CAUUCCU | Cleava<br>ge    | 1 |
| trf_1_4<br>10 | Bra036<br>771 | 20.<br>3 | 2 | 1 | 20 | 5378 | 5397 | GGGGAUGUAGCUCAGA<br>UGGU    | ACUGGCUGAGCUACAU<br>UCCU    | Cleava<br>ge    | 1 |
| trf_1_4<br>82 | Bra036<br>771 | 20.<br>3 | 2 | 1 | 23 | 5375 | 5397 | GGGGAUGUAGCUCAGA<br>UGGUAGA | UCGACUGGCUGAGCUA<br>CAUUCCU | Cleava<br>ge    | 1 |
| trf_1_4<br>86 | Bra036<br>771 | 20.<br>3 | 2 | 1 | 20 | 5378 | 5397 | GGGGAUGUAGCUCAGA<br>UGGU    | ACUGGCUGAGCUACAU<br>UCCU    | Cleava<br>ge    | 1 |
| trf_1_4<br>89 | Bra036<br>771 | 20.<br>3 | 2 | 1 | 23 | 5375 | 5397 | GGGGAUGUAGCUCAGA<br>UGGUAGA | UCGACUGGCUGAGCUA<br>CAUUCCU | Cleava<br>ge    | 1 |
| trf_1_4<br>94 | Bra036<br>771 | 20.<br>3 | 2 | 1 | 20 | 5378 | 5397 | GGGGAUGUAGCUCAGA<br>UGGU    | ACUGGCUGAGCUACAU<br>UCCU    | Cleava<br>ge    | 1 |
| trf_1_4<br>98 | Bra036<br>771 | 20.<br>3 | 2 | 1 | 20 | 5378 | 5397 | GGGGAUGUAGCUCAGA<br>UGGU    | ACUGGCUGAGCUACAU<br>UCCU    | Cleava<br>ge    | 1 |
| trf_1_4<br>99 | Bra036<br>771 | 20.<br>3 | 2 | 1 | 23 | 5375 | 5397 | GGGGAUGUAGCUCAGA<br>UGGUAGA | UCGACUGGCUGAGCUA<br>CAUUCCU | Cleava<br>ge    | 1 |
| trf_1_1<br>26 | Bra037<br>152 | 12.<br>3 | 2 | 1 | 22 | 478  | 499  | GACGGUUUGCCGAGU<br>GGUCUA   | UUGACUACUCGUCCAAA<br>CCCUC  | Transl<br>ation | 1 |
| trf_1_1<br>1  | Bra037<br>499 | 14.<br>3 | 7 | 1 | 22 | 174  | 195  | UCCGUUGUAGUCUAGC<br>UGGUUA  | UGACUGGUUAGGCCAC<br>AACGGA  | Transl<br>ation | 1 |
| trf_1_1<br>2  | Bra037<br>499 | 14.<br>3 | 7 | 1 | 22 | 174  | 195  | UCCGUUGUAGUCUAGC<br>UGGUUA  | UGACUGGUUAGGCCAC<br>AACGGA  | Transl<br>ation | 1 |
| trf_1_4<br>2  | Bra037<br>499 | 14.<br>3 | 7 | 1 | 22 | 174  | 195  | UCCGUUGUAGUCUAGC<br>UGGUCA  | UGACUGGUUAGGCCAC<br>AACGGA  | Transl<br>ation | 1 |
| trf_1_8<br>8  | Bra037<br>499 | 14.<br>3 | 7 | 1 | 22 | 174  | 195  | UCCGUUGUAGUCUAGC<br>UGGUCA  | UGACUGGUUAGGCCAC<br>AACGGA  | Transl<br>ation | 1 |
| trf_1_1<br>28 | Bra037<br>499 | 14.<br>3 | 7 | 1 | 22 | 174  | 195  | UCCGUUGUAGUCUAGC<br>UGGUCA  | UGACUGGUUAGGCCAC<br>AACGGA  | Transl<br>ation | 1 |
| trf_1_1<br>40 | Bra037<br>499 | 14.<br>3 | 7 | 1 | 22 | 174  | 195  | UCCGUUGUAGUCUAGC<br>UGGUCA  | UGACUGGUUAGGCCAC<br>AACGGA  | Transl<br>ation | 1 |
| trf_1_1<br>59 | Bra037<br>499 | 14.<br>3 | 7 | 1 | 22 | 174  | 195  | UCCGUUGUAGUCUAGC<br>UGGUCA  | UGACUGGUUAGGCCAC<br>AACGGA  | Transl<br>ation | 1 |
| trf_1_2<br>63 | Bra037<br>499 | 14.<br>3 | 7 | 1 | 22 | 174  | 195  | UCCGUUGUAGUCUAGC<br>UGGUCA  | UGACUGGUUAGGCCAC<br>AACGGA  | Transl<br>ation | 1 |

|         |        |     |     |   |    |     |     |                   |                   |        |   |
|---------|--------|-----|-----|---|----|-----|-----|-------------------|-------------------|--------|---|
| trf_1_3 | Bra037 | 14. |     |   |    |     |     | UCCGUUGUAGUCUAGC  | UGACUGGUUAGGCCAC  | Transl |   |
| 26      | 499    | 3   | 7   | 1 | 22 | 174 | 195 | UGGUCA            | AACGGA            | ation  | 1 |
| trf_1_5 | Bra037 | 14. |     |   |    |     |     | UCCGUUGUAGUCUAGC  | UGACUGGUUAGGCCAC  | Transl |   |
| 70      | 499    | 3   | 7   | 1 | 22 | 174 | 195 | UGGUCA            | AACGGA            | ation  | 1 |
|         | Bra037 | 22. |     |   |    |     |     | UCCGUUAUCGUCCAGCG | GUUGAAACCGCUGUCU  | Transl |   |
| trf_1_8 | 748    | 2.5 | 8   | 1 | 25 | 561 | 585 | GUUAGGAU          | GAUAACGGA         | ation  | 1 |
|         | Bra037 | 22. |     |   |    |     |     | UCCGUUAUCGUCCAGCG | GUUGAAACCGCUGUCU  | Transl |   |
| trf_1_9 | 748    | 2.5 | 8   | 1 | 25 | 561 | 585 | GUUAGGAU          | GAUAACGGA         | ation  | 1 |
| trf_1_1 | Bra037 | 22. |     |   |    |     |     | UCCGUUAUCGUCCAGCG | GUUGAAACCGCUGUCU  | Transl |   |
| 0       | 748    | 2.5 | 8   | 1 | 25 | 561 | 585 | GUUAGGAU          | GAUAACGGA         | ation  | 1 |
| trf_1_9 | Bra037 | 22. |     |   |    |     |     | UCCGUUGUCGUCCAGCG | GUUGAAACCGCUGUCU  | Transl |   |
| 4       | 748    | 3   | 8   | 1 | 25 | 561 | 585 | GUUAGGAU          | GAUAACGGA         | ation  | 1 |
| trf_1_9 | Bra037 | 22. |     |   |    |     |     | UCCGUUGUCGUCCAGCG | GUUGAAACCGCUGUCU  | Transl |   |
| 5       | 748    | 3   | 8   | 1 | 25 | 561 | 585 | GUUAGGAU          | GAUAACGGA         | ation  | 1 |
| trf_1_2 | Bra037 | 22. |     |   |    |     |     | UCCGUUAUCGUCCAGCG | GUUGAAACCGCUGUCU  | Transl |   |
| 31      | 748    | 2.5 | 8   | 1 | 25 | 561 | 585 | GUUAGGAU          | GAUAACGGA         | ation  | 1 |
| trf_1_2 | Bra037 | 22. |     |   |    |     |     | UCCGUUAUCGUCCAGCG | GUUGAAACCGCUGUCU  | Transl |   |
| 32      | 748    | 2.5 | 8   | 1 | 25 | 561 | 585 | GUUAGGAU          | GAUAACGGA         | ation  | 1 |
| trf_1_2 | Bra037 | 22. |     |   |    |     |     | UCCGUUGUCGUCCAGCG | AACCGCUGUCUGAUAAC | Transl |   |
| 59      | 748    | 3   | 8   | 1 | 20 | 566 | 585 | GUU               | GGA               | ation  | 1 |
| trf_1_2 | Bra037 | 22. |     |   |    |     |     | UCCGUUGUCGUCCAGCG | GUUGAAACCGCUGUCU  | Transl |   |
| 61      | 748    | 3   | 8   | 1 | 25 | 561 | 585 | GUUAGGAU          | GAUAACGGA         | ation  | 1 |
| trf_1_2 | Bra037 | 22. |     |   |    |     |     | UCCGUUGUCGUCCAGCG | GUUGAAACCGCUGUCU  | Transl |   |
| 87      | 748    | 3   | 8   | 1 | 25 | 561 | 585 | GUUAGGAU          | GAUAACGGA         | ation  | 1 |
| trf_1_2 | Bra037 | 22. |     |   |    |     |     | UCCGUUGUCGUCCAGCG | GUUGAAACCGCUGUCU  | Transl |   |
| 88      | 748    | 3   | 8   | 1 | 25 | 561 | 585 | GUUAGGAU          | GAUAACGGA         | ation  | 1 |
| trf_1_5 | Bra037 | 22. |     |   |    |     |     | UCCGUUGUCGUCCAGCG | GUUGAAACCGCUGUCU  | Transl |   |
| 10      | 748    | 3   | 8   | 1 | 25 | 561 | 585 | GUUAGGAU          | GAUAACGGA         | ation  | 1 |
| trf_1_5 | Bra037 | 22. |     |   |    |     |     | UCCGUUGUCGUCCAGCG | GUUGAAACCGCUGUCU  | Transl |   |
| 11      | 748    | 3   | 8   | 1 | 25 | 561 | 585 | GUUAGGAU          | GAUAACGGA         | ation  | 1 |
| trf_1_5 | Bra037 | 22. |     |   |    |     |     | UCCGUUGUCGUCCAGCG | AACCGCUGUCUGAUAAC | Transl |   |
| 12      | 748    | 3   | 8   | 1 | 20 | 566 | 585 | GUU               | GGA               | ation  | 1 |
| trf_1_2 | Bra038 |     |     |   |    |     |     | GUCGAUAUGUCCGAGU  | UAUCUAUUCGGACGUA  | Cleava |   |
| 7       | 442    | 3   | 9.2 | 1 | 21 | 202 | 222 | GGUUA             | UCGAU             | ge     | 1 |

|         |        |   |     |   |    |      |      |                   |                   |        |   |
|---------|--------|---|-----|---|----|------|------|-------------------|-------------------|--------|---|
| trf_1_3 | Bra038 |   |     |   |    |      |      | GUCGAUAUGUCCGAGU  | UAUCUAUUCGGACGUA  | Cleava |   |
| 45      | 442    | 3 | 9.2 | 1 | 21 | 202  | 222  | GGUUA             | UCGAU             | ge     | 1 |
| trf_1_5 | Bra040 |   | 13. |   |    |      |      | GUCUGGGUGGUGUAGU  | AGCUGACUCCAUCACUC | Cleava |   |
| 4       | 072    | 3 | 8   | 1 | 21 | 504  | 524  | CGGUU             | AGAC              | ge     | 1 |
| trf_1_1 | Bra040 |   | 13. |   |    |      |      | GUCUGGGUGGUGUAGU  | AGCUGACUCCAUCACUC | Cleava |   |
| 88      | 072    | 3 | 8   | 1 | 21 | 504  | 524  | CGGUU             | AGAC              | ge     | 1 |
| trf_1_5 | Bra040 |   | 13. |   |    |      |      | GUCUGGGUGGUGUAGU  | AGCUGACUCCAUCACUC | Cleava |   |
| 28      | 072    | 3 | 8   | 1 | 21 | 504  | 524  | CGGUU             | AGAC              | ge     | 1 |
| trf_1_2 | Bra040 |   | 16. |   |    |      |      | GGGUCGAUGCCCGAGCG | UUUCCGCUCGGGCCUU  | Cleava |   |
| 17      | 276    | 3 | 3   | 1 | 21 | 987  | 1007 | GAAA              | GAUCG             | ge     | 1 |
| trf_1_2 | Bra040 |   | 16. |   |    |      |      | GGGUCGAUGCCCGAGCG | UUCCGCUCGGGCCUUG  | Cleava |   |
| 21      | 276    | 3 | 3   | 1 | 20 | 988  | 1007 | GAA               | AUCG              | ge     | 1 |
| trf_1_7 | Bra040 |   | 21. |   |    |      |      | GCGCCUGUAGCUCAGU  | UUCCACUCAGCUACAGU | Cleava |   |
| 6       | 563    | 3 | 7   | 1 | 20 | 1048 | 1067 | GGAA              | UGC               | ge     | 1 |

# tRF - Apical Meristem

| ncRNA<br>_Acc. | Target<br>_Acc. | Expect<br>ation | U<br>PE | ncRNA<br>_start | ncRNA<br>_end | Target_<br>start | Target<br>_end | ncRNA_aligned_fragme<br>nt | Target_aligned_fragme<br>nt | Inhibit<br>ion | Multip<br>licity |
|----------------|-----------------|-----------------|---------|-----------------|---------------|------------------|----------------|----------------------------|-----------------------------|----------------|------------------|
|                | Bra024          |                 | 7.      |                 |               |                  |                | GGGGAUGUAGCUCAAA           | UUCCAACAUUUCGGUU            | Cleava         |                  |
| trf_2_1        | 638             | 3               | 5       | 1               | 24            | 202              | 225            | UGGUAGAG                   | ACAUCCCC                    | ge             | 1                |
|                | Bra025          |                 | 17      |                 |               |                  |                | GGGGAUGUAGCUCAAA           | ACAAUUUGAGCUUCAU            | Cleava         |                  |
| trf_2_1        | 904             | 3               | .2      | 1               | 20            | 344              | 363            | UGGU                       | CUUC                        | ge             | 1                |
|                | Bra024          |                 | 7.      |                 |               |                  |                | GGGGAUGUAGCUCAAA           | UCCAACAUUUCGGUUA            | Cleava         |                  |
| trf_2_2        | 638             | 3               | 5       | 1               | 23            | 203              | 225            | UGGUAGA                    | CAUCCCC                     | ge             | 1                |
|                | Bra025          |                 | 17      |                 |               |                  |                | GGGGAUGUAGCUCAAA           | ACAAUUUGAGCUUCAU            | Cleava         |                  |
| trf_2_2        | 904             | 3               | .2      | 1               | 20            | 344              | 363            | UGGU                       | CUUC                        | ge             | 1                |
|                | Bra000          |                 | 11      |                 |               |                  |                | UCCGUUAUCGUCCAGC           | AACCGGAGGACGAUA             | Cleava         |                  |
| trf_2_3        | 529             | 2.5             | .2      | 1               | 20            | 985              | 1004           | GGUU                       | UGGA                        | ge             | 1                |
|                | Bra032          |                 | 22      |                 |               |                  |                | UCCGUUAUCGUCCAGC           | GACGGCUUGACGAUGA            | Cleava         |                  |
| trf_2_3        | 111             | 3               | .4      | 1               | 20            | 727              | 746            | GGUU                       | CGGA                        | ge             | 1                |
|                | Bra000          |                 | 11      |                 |               |                  |                | UCCGUUAUCGUCCAGC           | UAACCGGAGGACGAUA            | Cleava         |                  |
| trf_2_4        | 529             | 2.5             | .2      | 1               | 21            | 984              | 1004           | GGUUA                      | AUGGA                       | ge             | 1                |
|                | Bra032          |                 | 22      |                 |               |                  |                | UCCGUUAUCGUCCAGC           | GACGGCUUGACGAUGA            | Cleava         |                  |
| trf_2_4        | 111             | 3               | .4      | 1               | 20            | 727              | 746            | GGUU                       | CGGA                        | ge             | 1                |
|                | Bra000          |                 | 11      |                 |               |                  |                | UCCGUUAUCGUCCAGC           | UAACCGGAGGACGAUA            | Cleava         |                  |
| trf_2_5        | 529             | 2.5             | .2      | 1               | 21            | 984              | 1004           | GGUUA                      | AUGGA                       | ge             | 1                |
|                | Bra032          |                 | 22      |                 |               |                  |                | UCCGUUAUCGUCCAGC           | GACGGCUUGACGAUGA            | Cleava         |                  |
| trf_2_5        | 111             | 3               | .4      | 1               | 20            | 727              | 746            | GGUU                       | CGGA                        | ge             | 1                |
|                | Bra000          |                 | 11      |                 |               |                  |                | UCCGUUAUCGUCCAGC           | UAACCGGAGGACGAUA            | Cleava         |                  |
| trf_2_7        | 529             | 2.5             | .2      | 1               | 21            | 984              | 1004           | GGUUA                      | AUGGA                       | ge             | 1                |
|                | Bra032          |                 | 22      |                 |               |                  |                | UCCGUUAUCGUCCAGC           | GACGGCUUGACGAUGA            | Cleava         |                  |
| trf_2_7        | 111             | 3               | .4      | 1               | 20            | 727              | 746            | GGUU                       | CGGA                        | ge             | 1                |
| trf_2_1        | Bra000          |                 | 11      |                 |               |                  |                | UCCGUUAUCGUCCAGC           | UAACCGGAGGACGAUA            | Cleava         |                  |
| 1              | 529             | 2.5             | .2      | 1               | 21            | 984              | 1004           | GGUUA                      | AUGGA                       | ge             | 1                |
| trf_2_1        | Bra032          |                 | 22      |                 |               |                  |                | UCCGUUAUCGUCCAGC           | GACGGCUUGACGAUGA            | Cleava         |                  |
| 1              | 111             | 3               | .4      | 1               | 20            | 727              | 746            | GGUU                       | CGGA                        | ge             | 1                |
| trf_2_1        | Bra000          |                 | 11      |                 |               |                  |                | UCCGUUAUCGUCCAGC           | UAACCGGAGGACGAUA            | Cleava         |                  |
| 2              | 529             | 2.5             | .2      | 1               | 21            | 984              | 1004           | GGUUA                      | AUGGA                       | ge             | 1                |

|         |        |     |    |   |    |      |      |                  |                  |          |   |
|---------|--------|-----|----|---|----|------|------|------------------|------------------|----------|---|
| trf_2_1 | Bra032 | 22  |    |   |    |      |      | UCCGUUAUCGUCCAGC | GACGGCUUGACGAUGA | Cleavage |   |
| 2       | 111    | 3   | .4 | 1 | 20 | 727  | 746  | GGUU             | CGGA             | ge       | 1 |
| trf_2_1 | Bra000 | 11  |    |   |    |      |      | UCCGUUAUCGUCCAGC | UAACCGGAGGACGAUA | Cleavage |   |
| 3       | 529    | 2.5 | .2 | 1 | 21 | 984  | 1004 | GGUUA            | AUGGA            | ge       | 1 |
| trf_2_1 | Bra032 | 22  |    |   |    |      |      | UCCGUUAUCGUCCAGC | GACGGCUUGACGAUGA | Cleavage |   |
| 3       | 111    | 3   | .4 | 1 | 20 | 727  | 746  | GGUU             | CGGA             | ge       | 1 |
| trf_2_1 | Bra013 | 22  |    |   |    |      |      | UCCGUUGUAGUCUAGC | CAUCAUCAGCUUGGCU | Cleavage |   |
| 4       | 528    | 3   | .0 | 1 | 24 | 196  | 219  | UGGUUAGG         | AUAACGGG         | ge       | 1 |
| trf_2_1 | Bra013 | 22  |    |   |    |      |      | UCCGUUGUAGUCUAGC | CAUCAUCAGCUUGGCU | Cleavage |   |
| 5       | 528    | 3   | .0 | 1 | 24 | 196  | 219  | UGGUUAGG         | AUAACGGG         | ge       | 1 |
| trf_2_1 | Bra024 | 7.  |    |   |    |      |      | GGGGAUGUAGCUCAAA | UCCAACAUUUCGGUUA | Cleavage |   |
| 6       | 638    | 3   | 5  | 1 | 23 | 203  | 225  | UGGUAGA          | CAUCCCC          | ge       | 1 |
| trf_2_1 | Bra025 | 17  |    |   |    |      |      | GGGGAUGUAGCUCAAA | ACAAUUUGAGCUUCAU | Cleavage |   |
| 6       | 904    | 3   | .2 | 1 | 20 | 344  | 363  | UGGU             | CUUC             | ge       | 1 |
| trf_2_1 | Bra016 | 20  |    |   |    |      |      | UCCGUCGUAGUCUAGC | CUGAAGAAGCUAGGCU | Cleavage |   |
| 7       | 601    | 3   | .8 | 1 | 24 | 415  | 438  | UGGUUAGG         | GCGACGGA         | ge       | 1 |
| trf_2_1 | Bra016 | 20  |    |   |    |      |      | UCCGUCGUAGUCUAGC | AAGAAGCUAGGCUGCG | Cleavage |   |
| 8       | 601    | 3   | .8 | 1 | 21 | 418  | 438  | UGGUU            | ACGGA            | ge       | 1 |
| trf_2_1 | Bra016 | 20  |    |   |    |      |      | UCCGUCGUAGUCUAGC | CUGAAGAAGCUAGGCU | Cleavage |   |
| 9       | 601    | 3   | .8 | 1 | 24 | 415  | 438  | UGGUUAGG         | GCGACGGA         | ge       | 1 |
| trf_2_2 | Bra016 | 20  |    |   |    |      |      | UCCGUCGUAGUCUAGC | AAGAAGCUAGGCUGCG | Cleavage |   |
| 1       | 601    | 3   | .8 | 1 | 21 | 418  | 438  | UGGUU            | ACGGA            | ge       | 1 |
| trf_2_2 | Bra016 | 20  |    |   |    |      |      | UCCGUCGUAGUCUAGC | CUGAAGAAGCUAGGCU | Cleavage |   |
| 2       | 601    | 3   | .8 | 1 | 24 | 415  | 438  | UGGUUAGG         | GCGACGGA         | ge       | 1 |
| trf_2_2 | Bra020 | 12  |    |   |    |      |      | GGGGAUGUAGCUCAAA | GCCAUUGGAGCUAUAU | Cleavage |   |
| 6       | 755    | 3   | .6 | 1 | 20 | 454  | 473  | UGGU             | UCUC             | ge       | 1 |
| trf_2_2 | Bra025 | 17  |    |   |    |      |      | GGGGAUGUAGCUCAAA | ACAAUUUGAGCUUCAU | Cleavage |   |
| 6       | 904    | 3   | .2 | 1 | 20 | 344  | 363  | UGGU             | CUUC             | ge       | 1 |
| trf_2_2 | Bra024 | 7.  |    |   |    |      |      | GGGGAUGUAGCUCAAA | AACAUUUCGGUUAU   | Cleavage |   |
| 6       | 638    | 3   | 5  | 1 | 20 | 206  | 225  | UGGU             | CCCC             | ge       | 1 |
| trf_2_2 | Bra009 | 14  |    |   |    |      |      | GGGGAUGUAGCUCAGA | UUAUCAUCUGGGCUUC | Cleavage |   |
| 7       | 876    | 3   | .9 | 1 | 22 | 16   | 37   | UGGUAG           | GUCCUC           | ge       | 1 |
| trf_2_2 | Bra016 | 10  |    |   |    |      |      | GGGGAUGUAGCUCAGA | UUAUCAUCUGAGCUUC | Cleavage |   |
| 7       | 141    | 3   | .4 | 1 | 22 | 3031 | 3052 | UGGUAG           | GUUCUC           | ge       | 1 |

|         |        |     |    |   |    |      |      |                  |                   |        |   |
|---------|--------|-----|----|---|----|------|------|------------------|-------------------|--------|---|
| trf_2_2 | Bra036 | 20  |    |   |    |      |      | GGGGAUGUAGCUCAGA | UCGACUGGCUGAGCUA  | Cleava |   |
| 7       | 771    | 3   | .2 | 1 | 23 | 5375 | 5397 | UGGUAGA          | CAUUCCU           | ge     | 1 |
| trf_2_2 | Bra018 | 8.  |    |   |    |      |      | GGGGAUGUAGCUCAGA | GCCACCUCAGCUACAUC | Cleava |   |
| 7       | 620    | 3   | 3  | 1 | 20 | 7    | 26   | UGGU             | CUC               | ge     | 1 |
| trf_2_3 | Bra013 | 22  |    |   |    |      |      | UCCGUUGUAGUCUAGC | CAUCAUCAGCUUGGCU  | Cleava |   |
| 7       | 528    | 3   | .0 | 1 | 24 | 196  | 219  | UGGUCAGG         | AUAACGGG          | ge     | 1 |
| trf_2_3 | Bra005 | 12  |    |   |    |      |      | GUGGCUGUAGUUUAG  | CUCACCGCUGAACUAU  | Cleava |   |
| 8       | 511    | 2.5 | .8 | 1 | 22 | 1113 | 1134 | UGGUGAG          | GGCUAC            | ge     | 1 |
| trf_2_3 | Bra035 | 17  |    |   |    |      |      | GUGGCUGUAGUUUAG  | UAUUCAUCUCUAGGCU  | Cleava |   |
| 8       | 454    | 3   | .9 | 1 | 24 | 1241 | 1264 | UGGUGAGAA        | ACAGCCAU          | ge     | 1 |
| trf_2_3 | Bra009 | 12  |    |   |    |      |      | GUGGCUGUAGUUUAG  | CAACAUUGAGCUACAG  | Cleava |   |
| 8       | 047    | 3   | .1 | 1 | 20 | 243  | 262  | UGGUG            | CCAU              | ge     | 1 |
| trf_2_4 | Bra007 | 14  |    |   |    |      |      | GCACCAGUGGUCUAGU | UUACUACUGGACCUUU  | Cleava |   |
| 9       | 154    | 2.5 | .1 | 1 | 21 | 510  | 530  | GGUAG            | GGUGC             | ge     | 1 |
| trf_2_5 | Bra009 | 14  |    |   |    |      |      | GGGGAUGUAGCUCAGA | UUAUCAUCUGGGCUUC  | Cleava |   |
| 5       | 876    | 3   | .9 | 1 | 22 | 16   | 37   | UGGUAG           | GUCCUC            | ge     | 1 |
| trf_2_5 | Bra016 | 10  |    |   |    |      |      | GGGGAUGUAGCUCAGA | UUAUCAUCUGAGCUUC  | Cleava |   |
| 5       | 141    | 3   | .4 | 1 | 22 | 3031 | 3052 | UGGUAG           | GUUCUC            | ge     | 1 |
| trf_2_5 | Bra036 | 20  |    |   |    |      |      | GGGGAUGUAGCUCAGA | UCGACUGGCUGAGCUA  | Cleava |   |
| 5       | 771    | 3   | .2 | 1 | 23 | 5375 | 5397 | UGGUAGA          | CAUUCCU           | ge     | 1 |
| trf_2_5 | Bra018 | 8.  |    |   |    |      |      | GGGGAUGUAGCUCAGA | GCCACCUCAGCUACAUC | Cleava |   |
| 5       | 620    | 3   | 3  | 1 | 20 | 7    | 26   | UGGU             | CUC               | ge     | 1 |
| trf_2_5 | Bra007 | 14  |    |   |    |      |      | GCACCAGUGGUCUAGU | UUACUACUGGACCUUU  | Cleava |   |
| 6       | 154    | 2.5 | .1 | 1 | 21 | 510  | 530  | GGUAG            | GGUGC             | ge     | 1 |
| trf_2_5 | Bra007 | 14  |    |   |    |      |      | GCACCAGUGGUCUAGU | UUACUACUGGACCUUU  | Cleava |   |
| 7       | 154    | 2.5 | .1 | 1 | 21 | 510  | 530  | GGUAG            | GGUGC             | ge     | 1 |
| trf_2_5 | Bra020 | 9.  |    |   |    |      |      | GGGGGUGUAGCUCAUA | UUAUUACAUCAGCUAC  | Cleava |   |
| 9       | 835    | 3   | 5  | 1 | 22 | 5316 | 5337 | UGGUAG           | ACCCCC            | ge     | 1 |
| trf_2_7 | Bra014 | 21  |    |   |    |      |      | GGUCCCAUGGUCUAGC | AGCUGCUAGACCUUGG  | Cleava |   |
| 2       | 489    | 2   | .1 | 1 | 20 | 168  | 187  | GGUU             | GACC              | ge     | 1 |
| trf_2_7 | Bra007 | 20  |    |   |    |      |      | GGUCCCAUGGUCUAGC | GGCUGCUAGACCUUGG  | Cleava |   |
| 2       | 535    | 3   | .1 | 1 | 20 | 51   | 70   | GGUU             | GAUC              | ge     | 1 |
| trf_2_7 | Bra013 | 22  |    |   |    |      |      | UCCGUUGUAGUCUAGC | AUCAGCUUGGCUAUAA  | Cleava |   |
| 3       | 528    | 3   | .0 | 1 | 20 | 200  | 219  | UGGU             | CGGG              | ge     | 1 |

|         |        |     |    |   |    |      |      |                  |                   |        |   |
|---------|--------|-----|----|---|----|------|------|------------------|-------------------|--------|---|
| trf_2_7 | Bra007 | 14  |    |   |    |      |      | GCACCAGUGGUCUAGU | UUACUACUGGACCUUU  | Cleava |   |
| 4       | 154    | 2.5 | .1 | 1 | 21 | 510  | 530  | GGUAG            | GGUGC             | ge     | 1 |
| trf_2_7 | Bra007 | 14  |    |   |    |      |      | GCACCAGUGGUCUAGU | UUACUACUGGACCUUU  | Cleava |   |
| 5       | 154    | 2.5 | .1 | 1 | 21 | 510  | 530  | GGUAG            | GGUGC             | ge     | 1 |
| trf_2_7 | Bra009 | 14  |    |   |    |      |      | GGGGAUGUAGCUCAGA | UUAUCAUCUGGGCUUC  | Cleava |   |
| 6       | 876    | 3   | .9 | 1 | 22 | 16   | 37   | UGGUAG           | GUCCUC            | ge     | 1 |
| trf_2_7 | Bra016 | 10  |    |   |    |      |      | GGGGAUGUAGCUCAGA | UUAUCAUCUGAGCUUC  | Cleava |   |
| 6       | 141    | 3   | .4 | 1 | 22 | 3031 | 3052 | UGGUAG           | GUUCUC            | ge     | 1 |
| trf_2_7 | Bra036 | 20  |    |   |    |      |      | GGGGAUGUAGCUCAGA | UCGACUGGCUGAGCUA  | Cleava |   |
| 6       | 771    | 3   | .2 | 1 | 23 | 5375 | 5397 | UGGUAGA          | CAUUCCU           | ge     | 1 |
| trf_2_7 | Bra018 | 8.  |    |   |    |      |      | GGGGAUGUAGCUCAGA | GCCACCUCAGCUACAUC | Cleava |   |
| 6       | 620    | 3   | 3  | 1 | 20 | 7    | 26   | UGGU             | CUC               | ge     | 1 |
| trf_2_7 | Bra013 | 16  |    |   |    |      |      | UCCGUUGUCGUCCAGC | AUGAUAACCGAUGGAU  | Cleava |   |
| 7       | 584    | 3   | .4 | 1 | 25 | 886  | 910  | GGUUAGGAU        | GUCAAUGGA         | ge     | 1 |
| trf_2_7 | Bra000 | 11  |    |   |    |      |      | UCCGUUGUCGUCCAGC | UAACCGGAGGACGAUA  | Cleava |   |
| 7       | 529    | 3   | .2 | 1 | 21 | 984  | 1004 | GGUUA            | AUGGA             | ge     | 1 |
| trf_2_7 | Bra013 | 16  |    |   |    |      |      | UCCGUUGUCGUCCAGC | UAACCGAUGGAUGUCA  | Cleava |   |
| 8       | 584    | 3   | .4 | 1 | 21 | 890  | 910  | GGUUA            | AUGGA             | ge     | 1 |
| trf_2_7 | Bra000 | 11  |    |   |    |      |      | UCCGUUGUCGUCCAGC | UAACCGGAGGACGAUA  | Cleava |   |
| 8       | 529    | 3   | .2 | 1 | 21 | 984  | 1004 | GGUUA            | AUGGA             | ge     | 1 |
| trf_2_8 | Bra013 | 16  |    |   |    |      |      | UCCGUUGUCGUCCAGC | UAACCGAUGGAUGUCA  | Cleava |   |
| 0       | 584    | 3   | .4 | 1 | 21 | 890  | 910  | GGUUA            | AUGGA             | ge     | 1 |
| trf_2_8 | Bra000 | 11  |    |   |    |      |      | UCCGUUGUCGUCCAGC | UAACCGGAGGACGAUA  | Cleava |   |
| 0       | 529    | 3   | .2 | 1 | 21 | 984  | 1004 | GGUUA            | AUGGA             | ge     | 1 |
| trf_2_8 | Bra013 | 16  |    |   |    |      |      | UCCGUUGUCGUCCAGC | AACCGAUGGAUGUCA   | Cleava |   |
| 1       | 584    | 3   | .4 | 1 | 20 | 891  | 910  | GGUU             | UGGA              | ge     | 1 |
| trf_2_8 | Bra000 | 11  |    |   |    |      |      | UCCGUUGUCGUCCAGC | AACCGGAGGACGAUAA  | Cleava |   |
| 1       | 529    | 3   | .2 | 1 | 20 | 985  | 1004 | GGUU             | UGGA              | ge     | 1 |
| trf_2_8 | Bra013 | 16  |    |   |    |      |      | UCCGUUGUCGUCCAGC | UAUGAUAACCGAUGGA  | Cleava |   |
| 3       | 584    | 3   | .4 | 1 | 26 | 885  | 910  | GGUUAGGAUA       | UGUCA AUGGA       | ge     | 1 |
| trf_2_8 | Bra000 | 11  |    |   |    |      |      | UCCGUUGUCGUCCAGC | UAACCGGAGGACGAUA  | Cleava |   |
| 3       | 529    | 3   | .2 | 1 | 21 | 984  | 1004 | GGUUA            | AUGGA             | ge     | 1 |
| trf_2_8 | Bra013 | 16  |    |   |    |      |      | UCCGUUGUCGUCCAGC | UAACCGAUGGAUGUCA  | Cleava |   |
| 5       | 584    | 3   | .4 | 1 | 21 | 890  | 910  | GGUUA            | AUGGA             | ge     | 1 |

|         |        |     |    |   |    |      |      |                  |                   |        |   |
|---------|--------|-----|----|---|----|------|------|------------------|-------------------|--------|---|
| trf_2_8 | Bra000 | 11  |    |   |    |      |      | UCCGUUGUCGUCCAGC | UAACCGGAGGACGAUA  | Cleava |   |
| 5       | 529    | 3   | .2 | 1 | 21 | 984  | 1004 | GGUUA            | AUGGA             | ge     | 1 |
| trf_2_8 | Bra013 | 16  |    |   |    |      |      | UCCGUUGUCGUCCAGC | UAUGAUAAACCGAUGGA | Cleava |   |
| 6       | 584    | 3   | .4 | 1 | 26 | 885  | 910  | GGUUAGGAUA       | UGUCAAUUGGA       | ge     | 1 |
| trf_2_8 | Bra000 | 11  |    |   |    |      |      | UCCGUUGUCGUCCAGC | UAACCGGAGGACGAUA  | Cleava |   |
| 6       | 529    | 3   | .2 | 1 | 21 | 984  | 1004 | GGUUA            | AUGGA             | ge     | 1 |
| trf_2_9 | Bra005 | 12  |    |   |    |      |      | GUGGCUGUAGUUUAG  | CUCACCGCUGAACUAU  | Cleava |   |
| 7       | 511    | 2.5 | .8 | 1 | 22 | 1113 | 1134 | UGGUGAG          | GGCUAC            | ge     | 1 |
| trf_2_9 | Bra035 | 17  |    |   |    |      |      | GUGGCUGUAGUUUAG  | UUCAUCUCUAGGCUAC  | Cleava |   |
| 7       | 454    | 3   | .9 | 1 | 22 | 1243 | 1264 | UGGUGAG          | AGCCAU            | ge     | 1 |
| trf_2_9 | Bra009 | 12  |    |   |    |      |      | GUGGCUGUAGUUUAG  | CAACAUUGAGCUACAG  | Cleava |   |
| 7       | 047    | 3   | .1 | 1 | 20 | 243  | 262  | UGGUG            | CCAU              | ge     | 1 |
| trf_2_9 | Bra005 | 12  |    |   |    |      |      | GUGGCUGUAGUUUAG  | CUCACCGCUGAACUAU  | Cleava |   |
| 8       | 511    | 2.5 | .8 | 1 | 22 | 1113 | 1134 | UGGUGAG          | GGCUAC            | ge     | 1 |
| trf_2_9 | Bra035 | 17  |    |   |    |      |      | GUGGCUGUAGUUUAG  | UAUUCAUCUCUAGGCU  | Cleava |   |
| 8       | 454    | 3   | .9 | 1 | 24 | 1241 | 1264 | UGGUGAGAA        | ACAGCCAU          | ge     | 1 |
| trf_2_9 | Bra009 | 12  |    |   |    |      |      | GUGGCUGUAGUUUAG  | CAACAUUGAGCUACAG  | Cleava |   |
| 8       | 047    | 3   | .1 | 1 | 20 | 243  | 262  | UGGUG            | CCAU              | ge     | 1 |
| trf_2_1 | Bra000 | 11  |    |   |    |      |      | GUCUGGGUGGUGUAG  | GCUAACCAACUACACCA | Cleava |   |
| 00      | 881    | 2.5 | .0 | 1 | 24 | 162  | 185  | UCGGUUAUC        | UCCAGAA           | ge     | 1 |
| trf_2_1 | Bra040 | 13  |    |   |    |      |      | GUCUGGGUGGUGUAG  | AGCUGACUCCAUCACU  | Cleava |   |
| 00      | 072    | 3   | .8 | 1 | 21 | 504  | 524  | UCGGUU           | CAGAC             | ge     | 1 |
| trf_2_1 | Bra012 | 15  |    |   |    |      |      | GUCUGGGUGGUGUAG  | ACCGGUUGCACCGUCC  | Cleava |   |
| 00      | 326    | 3   | .0 | 1 | 20 | 1326 | 1345 | UCGGU            | GGAC              | ge     | 1 |
| trf_2_1 | Bra003 | 15  |    |   |    |      |      | GUCUGGGUGGUGUAG  | GCUCACCAGCUACACCA | Cleava |   |
| 00      | 121    | 3   | .1 | 1 | 24 | 760  | 783  | UCGGUUAUC        | CACAGAC           | ge     | 1 |
| trf_2_1 | Bra024 | 7.  |    |   |    |      |      | GGGGAUGUAGCUCAAA | UCCAACAUUUCGGUUA  | Cleava |   |
| 16      | 638    | 3   | 5  | 1 | 23 | 203  | 225  | UGGUAGA          | CAUCCCC           | ge     | 1 |
| trf_2_1 | Bra025 | 17  |    |   |    |      |      | GGGGAUGUAGCUCAAA | ACAAUUUUGAGCUUCAU | Cleava |   |
| 16      | 904    | 3   | .2 | 1 | 20 | 344  | 363  | UGGU             | CUUC              | ge     | 1 |
| trf_2_1 | Bra014 | 17  |    |   |    |      |      | GGGGAUGUAGCUCAUA | AUUUAUUUAGCUAUAU  | Cleava |   |
| 17      | 507    | 3   | .0 | 1 | 20 | 544  | 563  | UGGU             | CUCC              | ge     | 1 |
| trf_2_1 | Bra014 | 17  |    |   |    |      |      | GGGGAUGUAGCUCAUA | UGUAUUUAUUAGCU    | Cleava |   |
| 18      | 507    | 3   | .0 | 1 | 23 | 541  | 563  | UGGUAGA          | AUAUCUCC          | ge     | 1 |



|         |        |    |    |   |    |      |      |                  |                  |        |   |
|---------|--------|----|----|---|----|------|------|------------------|------------------|--------|---|
| trf_2_1 | Bra014 | 17 |    |   |    |      |      | GGGGAUGUAGCUCAUA | UUGUAUUUAUUAUAGC | Cleava |   |
| 19      | 507    | 3  | .0 | 1 | 24 | 540  | 563  | UGGUAGAG         | UAUAUCUCC        | ge     | 1 |
| trf_2_1 | Bra024 | 7. |    |   |    |      |      | GGGGAUGUAGCUCAAA | UCCAACAUUUCGGUUA | Cleava |   |
| 20      | 638    | 3  | 5  | 1 | 23 | 203  | 225  | UGGUAGA          | CAUCCCC          | ge     | 1 |
| trf_2_1 | Bra025 | 17 |    |   |    |      |      | GGGGAUGUAGCUCAAA | ACAAUUUGAGCUUCAU | Cleava |   |
| 20      | 904    | 3  | .2 | 1 | 20 | 344  | 363  | UGGU             | CUUC             | ge     | 1 |
| trf_2_1 | Bra024 | 7. |    |   |    |      |      | GGGGAUGUAGCUCAAA | UCCAACAUUUCGGUU  | Cleava |   |
| 21      | 638    | 3  | 5  | 1 | 24 | 202  | 225  | UGGUAGAG         | ACAUCCCC         | ge     | 1 |
| trf_2_1 | Bra025 | 17 |    |   |    |      |      | GGGGAUGUAGCUCAAA | ACAAUUUGAGCUUCAU | Cleava |   |
| 21      | 904    | 3  | .2 | 1 | 20 | 344  | 363  | UGGU             | CUUC             | ge     | 1 |
| trf_2_1 | Bra019 | 12 |    |   |    |      |      | GACGGUUUGGCCGAGU | UGAGACUACUUGGUCC | Cleava |   |
| 22      | 760    | 3  | .5 | 1 | 23 | 1328 | 1350 | GGUCUAA          | AGCCGUC          | ge     | 1 |
| trf_2_1 | Bra000 | 16 |    |   |    |      |      | GACGGUUUGGCCGAGU | AACCAUUCGCCAAAUC | Cleava |   |
| 22      | 788    | 3  | .6 | 1 | 20 | 52   | 71   | GGUC             | GUC              | ge     | 1 |
| trf_2_1 | Bra003 | 24 |    |   |    |      |      | GACGGUUUGGCCGAGU | GGCGAUUCGGCCAAAU | Cleava |   |
| 22      | 534    | 3  | .7 | 1 | 20 | 3589 | 3608 | GGUC             | UGUC             | ge     | 1 |
| trf_2_1 | Bra002 | 10 |    |   |    |      |      | GACGGUUUGGCCGAGU | GACUUUCCGGCCAAAC | Cleava |   |
| 22      | 609    | 3  | .2 | 1 | 20 | 1237 | 1256 | GGUC             | CGUC             | ge     | 1 |
| trf_2_1 | Bra014 | 21 |    |   |    |      |      | GGUCCCAUGGUCUAGC | AGCUGCUAGACCUUGG | Cleava |   |
| 23      | 489    | 2  | .1 | 1 | 20 | 168  | 187  | GGUU             | GACC             | ge     | 1 |
| trf_2_1 | Bra007 | 20 |    |   |    |      |      | GGUCCCAUGGUCUAGC | GGCUGCUAGACCUUGG | Cleava |   |
| 23      | 535    | 3  | .1 | 1 | 20 | 51   | 70   | GGUU             | GAUC             | ge     | 1 |
| trf_2_1 | Bra014 | 21 |    |   |    |      |      | GGUCCCAUGGUCUAGC | AGCUGCUAGACCUUGG | Cleava |   |
| 24      | 489    | 2  | .1 | 1 | 20 | 168  | 187  | GGUU             | GACC             | ge     | 1 |
| trf_2_1 | Bra007 | 20 |    |   |    |      |      | GGUCCCAUGGUCUAGC | GGCUGCUAGACCUUGG | Cleava |   |
| 24      | 535    | 3  | .1 | 1 | 20 | 51   | 70   | GGUU             | GAUC             | ge     | 1 |
| trf_2_1 | Bra024 | 7. |    |   |    |      |      | GGGGAUGUAGCUCAAA | UCCAACAUUUCGGUU  | Cleava |   |
| 26      | 638    | 3  | 5  | 1 | 24 | 202  | 225  | UGGUAGAG         | ACAUCCCC         | ge     | 1 |
| trf_2_1 | Bra025 | 17 |    |   |    |      |      | GGGGAUGUAGCUCAAA | ACAAUUUGAGCUUCAU | Cleava |   |
| 26      | 904    | 3  | .2 | 1 | 20 | 344  | 363  | UGGU             | CUUC             | ge     | 1 |
| trf_2_1 | Bra024 | 7. |    |   |    |      |      | GGGGAUGUAGCUCAAA | UCCAACAUUUCGGUUA | Cleava |   |
| 27      | 638    | 3  | 5  | 1 | 23 | 203  | 225  | UGGUAGA          | CAUCCCC          | ge     | 1 |
| trf_2_1 | Bra025 | 17 |    |   |    |      |      | GGGGAUGUAGCUCAAA | ACAAUUUGAGCUUCAU | Cleava |   |
| 27      | 904    | 3  | .2 | 1 | 20 | 344  | 363  | UGGU             | CUUC             | ge     | 1 |

|         |        |     |    |   |    |      |      |                  |                   |        |   |
|---------|--------|-----|----|---|----|------|------|------------------|-------------------|--------|---|
| trf_2_1 | Bra009 | 14  |    |   |    |      |      | GGGGAUGUAGCUCAGA | UUAUCAUCUGGGCUUC  | Cleava |   |
| 28      | 876    | 3   | .9 | 1 | 22 | 16   | 37   | UGGUAG           | GUCCUC            | ge     | 1 |
| trf_2_1 | Bra016 | 10  |    |   |    |      |      | GGGGAUGUAGCUCAGA | UUAUCAUCUGAGCUUC  | Cleava |   |
| 28      | 141    | 3   | .4 | 1 | 22 | 3031 | 3052 | UGGUAG           | GUUCUC            | ge     | 1 |
| trf_2_1 | Bra036 | 20  |    |   |    |      |      | GGGGAUGUAGCUCAGA | UCGACUGGCUGAGCUA  | Cleava |   |
| 28      | 771    | 3   | .2 | 1 | 23 | 5375 | 5397 | UGGUAGA          | CAUUCCU           | ge     | 1 |
| trf_2_1 | Bra018 | 8.  |    |   |    |      |      | GGGGAUGUAGCUCAGA | GCCACCUCAGCUACAUC | Cleava |   |
| 28      | 620    | 3   | 3  | 1 | 20 | 7    | 26   | UGGU             | CUC               | ge     | 1 |
| trf_2_1 | Bra009 | 14  |    |   |    |      |      | GGGGAUGUAGCUCAGA | GCGUUAUCAUCUGGGC  | Cleava |   |
| 29      | 876    | 3   | .9 | 1 | 25 | 13   | 37   | UGGUAGAGC        | UUCGUCCUC         | ge     | 1 |
| trf_2_1 | Bra036 | 20  |    |   |    |      |      | GGGGAUGUAGCUCAGA | CUCGACUGGCUGAGCU  | Cleava |   |
| 29      | 771    | 3   | .2 | 1 | 24 | 5374 | 5397 | UGGUAGAG         | ACAUUCCU          | ge     | 1 |
| trf_2_1 | Bra016 | 10  |    |   |    |      |      | GGGGAUGUAGCUCAGA | CAUUAUCAUCUGAGCU  | Cleava |   |
| 29      | 141    | 3   | .4 | 1 | 24 | 3029 | 3052 | UGGUAGAG         | UCGUUCUC          | ge     | 1 |
| trf_2_1 | Bra018 | 8.  |    |   |    |      |      | GGGGAUGUAGCUCAGA | GCCACCUCAGCUACAUC | Cleava |   |
| 29      | 620    | 3   | 3  | 1 | 20 | 7    | 26   | UGGU             | CUC               | ge     | 1 |
| trf_2_1 | Bra007 | 14  |    |   |    |      |      | GCACCAGUGGUCUAGU | UUACUACUGGACCUUU  | Cleava |   |
| 30      | 154    | 2.5 | .1 | 1 | 21 | 510  | 530  | GGUAG            | GGUGC             | ge     | 1 |
| trf_2_1 | Bra007 | 14  |    |   |    |      |      | GCACCAGUGGUCUAGU | UUACUACUGGACCUUU  | Cleava |   |
| 31      | 154    | 2.5 | .1 | 1 | 21 | 510  | 530  | GGUAG            | GGUGC             | ge     | 1 |
| trf_2_1 | Bra000 | 15  |    |   |    |      |      | GGUUCUAUGGUCUAGC | GACCGCUGGACCAGAG  | Cleava |   |
| 33      | 719    | 3   | .3 | 1 | 20 | 1680 | 1699 | GGUU             | AACU              | ge     | 1 |
| trf_2_1 | Bra014 | 21  |    |   |    |      |      | GGUUCUAUGGUCUAGC | AGCUGCUAGACCUUGG  | Cleava |   |
| 33      | 489    | 3   | .1 | 1 | 20 | 168  | 187  | GGUU             | GACC              | ge     | 1 |
| trf_2_1 | Bra005 | 12  |    |   |    |      |      | GUGGCUGUAGUUUAG  | CUCACCGCUGAACUUAU | Cleava |   |
| 42      | 511    | 2.5 | .8 | 1 | 22 | 1113 | 1134 | UGGUGAG          | GGCUAC            | ge     | 1 |
| trf_2_1 | Bra035 | 17  |    |   |    |      |      | GUGGCUGUAGUUUAG  | UAUUCAUCUCUAGGCU  | Cleava |   |
| 42      | 454    | 3   | .9 | 1 | 24 | 1241 | 1264 | UGGUGAGAA        | ACAGCCAU          | ge     | 1 |
| trf_2_1 | Bra009 | 12  |    |   |    |      |      | GUGGCUGUAGUUUAG  | CAACAUUGAGCUACAG  | Cleava |   |
| 42      | 047    | 3   | .1 | 1 | 20 | 243  | 262  | UGGUG            | CCAU              | ge     | 1 |
| trf_2_1 | Bra007 | 14  |    |   |    |      |      | GCACCAGUGGUCUAGU | UUACUACUGGACCUUU  | Cleava |   |
| 47      | 154    | 2.5 | .1 | 1 | 21 | 510  | 530  | GGUAG            | GGUGC             | ge     | 1 |
| trf_2_1 | Bra009 | 14  |    |   |    |      |      | GGGGAUGUAGCUCAGA | UUAUCAUCUGGGCUUC  | Cleava |   |
| 49      | 876    | 3   | .9 | 1 | 22 | 16   | 37   | UGGUAG           | GUCCUC            | ge     | 1 |

|         |        |     |    |   |    |      |      |                  |                   |        |   |
|---------|--------|-----|----|---|----|------|------|------------------|-------------------|--------|---|
| trf_2_1 | Bra016 | 10  |    |   |    |      |      | GGGGAUGUAGCUCAGA | UUAUCAUCUGAGCUUC  | Cleava |   |
| 49      | 141    | 3   | .4 | 1 | 22 | 3031 | 3052 | UGGUAG           | GUUCUC            | ge     | 1 |
| trf_2_1 | Bra036 | 20  |    |   |    |      |      | GGGGAUGUAGCUCAGA | UCGACUGGCUGAGCUA  | Cleava |   |
| 49      | 771    | 3   | .2 | 1 | 23 | 5375 | 5397 | UGGUAGA          | CAUUCCU           | ge     | 1 |
| trf_2_1 | Bra018 | 8.  |    |   |    |      |      | GGGGAUGUAGCUCAGA | GCCACCUCAGCUACAUC | Cleava |   |
| 49      | 620    | 3   | 3  | 1 | 20 | 7    | 26   | UGGU             | CUC               | ge     | 1 |
| trf_2_1 | Bra007 | 14  |    |   |    |      |      | GCACCAGUGGUCUAGU | UUACUACUGGACCUUU  | Cleava |   |
| 50      | 154    | 2.5 | .1 | 1 | 21 | 510  | 530  | GGUAG            | GGUGC             | ge     | 1 |
| trf_2_1 | Bra013 | 22  |    |   |    |      |      | UCCGUUGUAGUCUAGC | CAUCAUCAGCUUGGCU  | Cleava |   |
| 52      | 528    | 3   | .0 | 1 | 24 | 196  | 219  | UGGUCAGG         | AUAACGGG          | ge     | 1 |
| trf_2_1 | Bra009 | 14  |    |   |    |      |      | GGGGAUGUAGCUCAGA | UUAUCAUCUGGGCUUC  | Cleava |   |
| 53      | 876    | 3   | .9 | 1 | 22 | 16   | 37   | UGGUAG           | GUCCUC            | ge     | 1 |
| trf_2_1 | Bra016 | 10  |    |   |    |      |      | GGGGAUGUAGCUCAGA | UUAUCAUCUGAGCUUC  | Cleava |   |
| 53      | 141    | 3   | .4 | 1 | 22 | 3031 | 3052 | UGGUAG           | GUUCUC            | ge     | 1 |
| trf_2_1 | Bra036 | 20  |    |   |    |      |      | GGGGAUGUAGCUCAGA | UCGACUGGCUGAGCUA  | Cleava |   |
| 53      | 771    | 3   | .2 | 1 | 23 | 5375 | 5397 | UGGUAGA          | CAUUCCU           | ge     | 1 |
| trf_2_1 | Bra018 | 8.  |    |   |    |      |      | GGGGAUGUAGCUCAGA | GCCACCUCAGCUACAUC | Cleava |   |
| 53      | 620    | 3   | 3  | 1 | 20 | 7    | 26   | UGGU             | CUC               | ge     | 1 |
| trf_2_1 | Bra007 | 14  |    |   |    |      |      | GCACCAGUGGUCUAGU | UUACUACUGGACCUUU  | Cleava |   |
| 54      | 154    | 2.5 | .1 | 1 | 21 | 510  | 530  | GGUAG            | GGUGC             | ge     | 1 |
| trf_2_1 | Bra009 | 14  |    |   |    |      |      | GGGGAUGUAGCUCAGA | UUAUCAUCUGGGCUUC  | Cleava |   |
| 55      | 876    | 3   | .9 | 1 | 22 | 16   | 37   | UGGUAG           | GUCCUC            | ge     | 1 |
| trf_2_1 | Bra016 | 10  |    |   |    |      |      | GGGGAUGUAGCUCAGA | UUAUCAUCUGAGCUUC  | Cleava |   |
| 55      | 141    | 3   | .4 | 1 | 22 | 3031 | 3052 | UGGUAG           | GUUCUC            | ge     | 1 |
| trf_2_1 | Bra036 | 20  |    |   |    |      |      | GGGGAUGUAGCUCAGA | UCGACUGGCUGAGCUA  | Cleava |   |
| 55      | 771    | 3   | .2 | 1 | 23 | 5375 | 5397 | UGGUAGA          | CAUUCCU           | ge     | 1 |
| trf_2_1 | Bra018 | 8.  |    |   |    |      |      | GGGGAUGUAGCUCAGA | GCCACCUCAGCUACAUC | Cleava |   |
| 55      | 620    | 3   | 3  | 1 | 20 | 7    | 26   | UGGU             | CUC               | ge     | 1 |
| trf_2_1 | Bra009 | 14  |    |   |    |      |      | GGGGAUGUAGCUCAGA | UUAUCAUCUGGGCUUC  | Cleava |   |
| 64      | 876    | 3   | .9 | 1 | 22 | 16   | 37   | UGGUAG           | GUCCUC            | ge     | 1 |
| trf_2_1 | Bra016 | 10  |    |   |    |      |      | GGGGAUGUAGCUCAGA | UUAUCAUCUGAGCUUC  | Cleava |   |
| 64      | 141    | 3   | .4 | 1 | 22 | 3031 | 3052 | UGGUAG           | GUUCUC            | ge     | 1 |
| trf_2_1 | Bra036 | 20  |    |   |    |      |      | GGGGAUGUAGCUCAGA | UCGACUGGCUGAGCUA  | Cleava |   |
| 64      | 771    | 3   | .2 | 1 | 23 | 5375 | 5397 | UGGUAGA          | CAUUCCU           | ge     | 1 |

|         |        |     |    |   |    |      |      |                  |                   |        |   |
|---------|--------|-----|----|---|----|------|------|------------------|-------------------|--------|---|
| trf_2_1 | Bra018 | 8.  |    |   |    |      |      | GGGGAUGUAGCUCAGA | GCCACCUCAGCUACAUC | Cleava |   |
| 64      | 620    | 3   | 3  | 1 | 20 | 7    | 26   | UGGU             | CUC               | ge     | 1 |
| trf_2_1 | Bra013 | 22  |    |   |    |      |      | UCCGUUGUAGUCUAGC | CAUCAUCAGCUUGGCU  | Cleava |   |
| 73      | 528    | 3   | .0 | 1 | 24 | 196  | 219  | UGGUCAGG         | AUAACGGG          | ge     | 1 |
| trf_2_1 | Bra000 | 15  |    |   |    |      |      | GGUUCUAUGGUCUAGC | GACCGCUGGACCAGAG  | Cleava |   |
| 82      | 719    | 3   | .3 | 1 | 20 | 1680 | 1699 | GGUU             | AACU              | ge     | 1 |
| trf_2_1 | Bra014 | 21  |    |   |    |      |      | GGUUCUAUGGUCUAGC | AGCUGCUAGACCUUGG  | Cleava |   |
| 82      | 489    | 3   | .1 | 1 | 20 | 168  | 187  | GGUU             | GACC              | ge     | 1 |
| trf_2_1 | Bra000 | 15  |    |   |    |      |      | GGUUCUAUGGUCUAGC | GACCGCUGGACCAGAG  | Cleava |   |
| 83      | 719    | 3   | .3 | 1 | 20 | 1680 | 1699 | GGUU             | AACU              | ge     | 1 |
| trf_2_1 | Bra014 | 21  |    |   |    |      |      | GGUUCUAUGGUCUAGC | AGCUGCUAGACCUUGG  | Cleava |   |
| 83      | 489    | 3   | .1 | 1 | 20 | 168  | 187  | GGUU             | GACC              | ge     | 1 |
| trf_2_1 | Bra000 | 11  |    |   |    |      |      | UCCGUUAUCGUCCAGC | UAACCGGAGGACGAUA  | Cleava |   |
| 86      | 529    | 2.5 | .2 | 1 | 21 | 984  | 1004 | GGUUA            | AUGGA             | ge     | 1 |
| trf_2_1 | Bra032 | 22  |    |   |    |      |      | UCCGUUAUCGUCCAGC | GACGGCUUGACGAUGA  | Cleava |   |
| 86      | 111    | 3   | .4 | 1 | 20 | 727  | 746  | GGUU             | CGGA              | ge     | 1 |
| trf_2_1 | Bra000 | 11  |    |   |    |      |      | UCCGUUAUCGUCCAGC | UAACCGGAGGACGAUA  | Cleava |   |
| 87      | 529    | 2.5 | .2 | 1 | 21 | 984  | 1004 | GGUUA            | AUGGA             | ge     | 1 |
| trf_2_1 | Bra032 | 22  |    |   |    |      |      | UCCGUUAUCGUCCAGC | GACGGCUUGACGAUGA  | Cleava |   |
| 87      | 111    | 3   | .4 | 1 | 20 | 727  | 746  | GGUU             | CGGA              | ge     | 1 |
| trf_2_1 | Bra000 | 11  |    |   |    |      |      | UCCGUUAUCGUCCAGC | UAACCGGAGGACGAUA  | Cleava |   |
| 88      | 529    | 2.5 | .2 | 1 | 21 | 984  | 1004 | GGUUA            | AUGGA             | ge     | 1 |
| trf_2_1 | Bra032 | 22  |    |   |    |      |      | UCCGUUAUCGUCCAGC | GACGGCUUGACGAUGA  | Cleava |   |
| 88      | 111    | 3   | .4 | 1 | 20 | 727  | 746  | GGUU             | CGGA              | ge     | 1 |
| trf_2_1 | Bra000 | 11  |    |   |    |      |      | UCCGUUAUCGUCCAGC | AACCGGAGGACGAUAA  | Cleava |   |
| 90      | 529    | 2.5 | .2 | 1 | 20 | 985  | 1004 | GGUU             | UGGA              | ge     | 1 |
| trf_2_1 | Bra032 | 22  |    |   |    |      |      | UCCGUUAUCGUCCAGC | GACGGCUUGACGAUGA  | Cleava |   |
| 90      | 111    | 3   | .4 | 1 | 20 | 727  | 746  | GGUU             | CGGA              | ge     | 1 |
| trf_2_1 | Bra000 | 11  |    |   |    |      |      | UCCGUUAUCGUCCAGC | UAACCGGAGGACGAUA  | Cleava |   |
| 92      | 529    | 2.5 | .2 | 1 | 21 | 984  | 1004 | GGUUA            | AUGGA             | ge     | 1 |
| trf_2_1 | Bra032 | 22  |    |   |    |      |      | UCCGUUAUCGUCCAGC | GACGGCUUGACGAUGA  | Cleava |   |
| 92      | 111    | 3   | .4 | 1 | 20 | 727  | 746  | GGUU             | CGGA              | ge     | 1 |
| trf_2_1 | Bra000 | 11  |    |   |    |      |      | UCCGUUAUCGUCCAGC | UAACCGGAGGACGAUA  | Cleava |   |
| 93      | 529    | 2.5 | .2 | 1 | 21 | 984  | 1004 | GGUUA            | AUGGA             | ge     | 1 |

|         |        |     |    |   |    |      |      |                  |                   |        |   |
|---------|--------|-----|----|---|----|------|------|------------------|-------------------|--------|---|
| trf_2_1 | Bra032 | 22  |    |   |    |      |      | UCCGUUAUCGUCCAGC | GACGGCUUGACGAUGA  | Cleava |   |
| 93      | 111    | 3   | .4 | 1 | 20 | 727  | 746  | GGUU             | CGGA              | ge     | 1 |
| trf_2_1 | Bra000 | 11  |    |   |    |      |      | UCCGUUAUCGUCCAGC | UAACCGGAGGACGAUA  | Cleava |   |
| 94      | 529    | 2.5 | .2 | 1 | 21 | 984  | 1004 | GGUUA            | AUGGA             | ge     | 1 |
| trf_2_1 | Bra032 | 22  |    |   |    |      |      | UCCGUUAUCGUCCAGC | GACGGCUUGACGAUGA  | Cleava |   |
| 94      | 111    | 3   | .4 | 1 | 20 | 727  | 746  | GGUU             | CGGA              | ge     | 1 |
| trf_2_1 | Bra009 | 14  |    |   |    |      |      | GGGGAUGUAGCUCAGA | UUAUCAUCUGGGCUUC  | Cleava |   |
| 95      | 876    | 3   | .9 | 1 | 22 | 16   | 37   | UGGUAG           | GUCCUC            | ge     | 1 |
| trf_2_1 | Bra016 | 10  |    |   |    |      |      | GGGGAUGUAGCUCAGA | UUAUCAUCUGAGCUUC  | Cleava |   |
| 95      | 141    | 3   | .4 | 1 | 22 | 3031 | 3052 | UGGUAG           | GUUCUC            | ge     | 1 |
| trf_2_1 | Bra036 | 20  |    |   |    |      |      | GGGGAUGUAGCUCAGA | UCGACUGGCUGAGCUA  | Cleava |   |
| 95      | 771    | 3   | .2 | 1 | 23 | 5375 | 5397 | UGGUAGA          | CAUUCCU           | ge     | 1 |
| trf_2_1 | Bra018 | 8.  |    |   |    |      |      | GGGGAUGUAGCUCAGA | GCCACCUCAGCUACAUC | Cleava |   |
| 95      | 620    | 3   | 3  | 1 | 20 | 7    | 26   | UGGU             | CUC               | ge     | 1 |
| trf_2_2 | Bra009 | 14  |    |   |    |      |      | GGGGAUGUAGCUCAGA | UUAUCAUCUGGGCUUC  | Cleava |   |
| 08      | 876    | 3   | .9 | 1 | 22 | 16   | 37   | UGGUAG           | GUCCUC            | ge     | 1 |
| trf_2_2 | Bra016 | 10  |    |   |    |      |      | GGGGAUGUAGCUCAGA | UUAUCAUCUGAGCUUC  | Cleava |   |
| 08      | 141    | 3   | .4 | 1 | 22 | 3031 | 3052 | UGGUAG           | GUUCUC            | ge     | 1 |
| trf_2_2 | Bra036 | 20  |    |   |    |      |      | GGGGAUGUAGCUCAGA | UCGACUGGCUGAGCUA  | Cleava |   |
| 08      | 771    | 3   | .2 | 1 | 23 | 5375 | 5397 | UGGUAGA          | CAUUCCU           | ge     | 1 |
| trf_2_2 | Bra018 | 8.  |    |   |    |      |      | GGGGAUGUAGCUCAGA | GCCACCUCAGCUACAUC | Cleava |   |
| 08      | 620    | 3   | 3  | 1 | 20 | 7    | 26   | UGGU             | CUC               | ge     | 1 |
| trf_2_2 | Bra007 | 14  |    |   |    |      |      | GCACCAGUGGUCUAGU | UUACUACUGGACCUUU  | Cleava |   |
| 10      | 154    | 2.5 | .1 | 1 | 21 | 510  | 530  | GGUAG            | GGUGC             | ge     | 1 |
| trf_2_2 | Bra013 | 16  |    |   |    |      |      | UCCGUUGUCGUCCAGC | UAACCGAUGGAUGUCA  | Cleava |   |
| 24      | 584    | 3   | .4 | 1 | 21 | 890  | 910  | GGUUA            | AUGGA             | ge     | 1 |
| trf_2_2 | Bra000 | 11  |    |   |    |      |      | UCCGUUGUCGUCCAGC | UAACCGGAGGACGAUA  | Cleava |   |
| 24      | 529    | 3   | .2 | 1 | 21 | 984  | 1004 | GGUUA            | AUGGA             | ge     | 1 |
| trf_2_2 | Bra013 | 16  |    |   |    |      |      | UCCGUUGUCGUCCAGC | AUGAUAACCGAUGGAU  | Cleava |   |
| 25      | 584    | 3   | .4 | 1 | 25 | 886  | 910  | GGUUAGGAU        | GUCAAUGGA         | ge     | 1 |
| trf_2_2 | Bra000 | 11  |    |   |    |      |      | UCCGUUGUCGUCCAGC | UAACCGGAGGACGAUA  | Cleava |   |
| 25      | 529    | 3   | .2 | 1 | 21 | 984  | 1004 | GGUUA            | AUGGA             | ge     | 1 |
| trf_2_2 | Bra013 | 16  |    |   |    |      |      | UCCGUUGUCGUCCAGC | UAUGAUAACCGAUGGA  | Cleava |   |
| 26      | 584    | 3   | .4 | 1 | 26 | 885  | 910  | GGUUAGGAUA       | UGUCA AUGGA       | ge     | 1 |

|         |        |     |    |   |    |      |      |                  |                   |        |   |
|---------|--------|-----|----|---|----|------|------|------------------|-------------------|--------|---|
| trf_2_2 | Bra000 | 11  |    |   |    |      |      | UCCGUUGUCGUCCAGC | UAACCGGAGGACGAUA  | Cleava |   |
| 26      | 529    | 3   | .2 | 1 | 21 | 984  | 1004 | GGUUA            | AUGGA             | ge     | 1 |
| trf_2_2 | Bra013 | 16  |    |   |    |      |      | UCCGUUGUCGUCCAGC | UAACCGAUGGAUGUCA  | Cleava |   |
| 27      | 584    | 3   | .4 | 1 | 21 | 890  | 910  | GGUUA            | AUGGA             | ge     | 1 |
| trf_2_2 | Bra000 | 11  |    |   |    |      |      | UCCGUUGUCGUCCAGC | UAACCGGAGGACGAUA  | Cleava |   |
| 27      | 529    | 3   | .2 | 1 | 21 | 984  | 1004 | GGUUA            | AUGGA             | ge     | 1 |
| trf_2_2 | Bra013 | 16  |    |   |    |      |      | UCCGUUGUCGUCCAGC | AACCGAUGGAUGUCA   | Cleava |   |
| 28      | 584    | 3   | .4 | 1 | 20 | 891  | 910  | GGUU             | UGGA              | ge     | 1 |
| trf_2_2 | Bra000 | 11  |    |   |    |      |      | UCCGUUGUCGUCCAGC | AACCGGAGGACGAUAA  | Cleava |   |
| 28      | 529    | 3   | .2 | 1 | 20 | 985  | 1004 | GGUU             | UGGA              | ge     | 1 |
| trf_2_2 | Bra013 | 16  |    |   |    |      |      | UCCGUUGUCGUCCAGC | UAUGAUAAACCGAUGGA | Cleava |   |
| 29      | 584    | 3   | .4 | 1 | 26 | 885  | 910  | GGUUAGGAUA       | UGUCA AUGGA       | ge     | 1 |
| trf_2_2 | Bra000 | 11  |    |   |    |      |      | UCCGUUGUCGUCCAGC | UAACCGGAGGACGAUA  | Cleava |   |
| 29      | 529    | 3   | .2 | 1 | 21 | 984  | 1004 | GGUUA            | AUGGA             | ge     | 1 |
| trf_2_2 | Bra013 | 16  |    |   |    |      |      | UCCGUUGUCGUCCAGC | UAACCGAUGGAUGUCA  | Cleava |   |
| 30      | 584    | 3   | .4 | 1 | 21 | 890  | 910  | GGUUA            | AUGGA             | ge     | 1 |
| trf_2_2 | Bra000 | 11  |    |   |    |      |      | UCCGUUGUCGUCCAGC | UAACCGGAGGACGAUA  | Cleava |   |
| 30      | 529    | 3   | .2 | 1 | 21 | 984  | 1004 | GGUUA            | AUGGA             | ge     | 1 |
| trf_2_2 | Bra007 | 14  |    |   |    |      |      | GCACCAGUGGUCUAGU | UUACUACUGGACCUUU  | Cleava |   |
| 35      | 154    | 2.5 | .1 | 1 | 21 | 510  | 530  | GGUAG            | GGUGC             | ge     | 1 |
| trf_2_2 | Bra013 | 22  |    |   |    |      |      | UCCGUUGUAGUCUAGC | CAUCAUCAGCUUGGCU  | Cleava |   |
| 36      | 528    | 3   | .0 | 1 | 24 | 196  | 219  | UGGUCAGG         | AUAACGGG          | ge     | 1 |
| trf_2_2 | Bra009 | 14  |    |   |    |      |      | GGGGAUGUAGCUCAGA | UUAUCAUCUGGGCUUC  | Cleava |   |
| 37      | 876    | 3   | .9 | 1 | 22 | 16   | 37   | UGGUAG           | GUCCUC            | ge     | 1 |
| trf_2_2 | Bra016 | 10  |    |   |    |      |      | GGGGAUGUAGCUCAGA | UUAUCAUCUGAGCUUC  | Cleava |   |
| 37      | 141    | 3   | .4 | 1 | 22 | 3031 | 3052 | UGGUAG           | GUUCUC            | ge     | 1 |
| trf_2_2 | Bra036 | 20  |    |   |    |      |      | GGGGAUGUAGCUCAGA | UCGACUGGCUGAGCUA  | Cleava |   |
| 37      | 771    | 3   | .2 | 1 | 23 | 5375 | 5397 | UGGUAGA          | CAUUCCU           | ge     | 1 |
| trf_2_2 | Bra018 | 8.  |    |   |    |      |      | GGGGAUGUAGCUCAGA | GCCACCUCAGCUACAUC | Cleava |   |
| 37      | 620    | 3   | 3  | 1 | 20 | 7    | 26   | UGGU             | CUC               | ge     | 1 |
| trf_2_2 | Bra024 | 20  |    |   |    |      |      | GCGUCCAUUGUCUAAU | GUUCUGUCCAUCAGAU  | Cleava |   |
| 38      | 316    | 3   | .4 | 1 | 25 | 431  | 455  | GGAUAGGAC        | ACUGGACGC         | ge     | 1 |
| trf_2_2 | Bra007 | 16  |    |   |    |      |      | GCGUCCAUUGUCUAAU | AUCCGUCAGACAAUGG  | Cleava |   |
| 38      | 620    | 3   | .3 | 1 | 20 | 292  | 311  | GGAU             | AAGC              | ge     | 1 |

|         |        |     |    |   |    |      |      |                  |                   |        |   |
|---------|--------|-----|----|---|----|------|------|------------------|-------------------|--------|---|
| trf_2_2 | Bra010 | 20  |    |   |    |      |      | GCGUCCAUUGUCUAAU | AUGCAUCAGAUAGUGG  | Cleava |   |
| 38      | 618    | 3   | .4 | 1 | 20 | 442  | 461  | GGAU             | ACGC              | ge     | 1 |
| trf_2_2 | Bra024 | 20  |    |   |    |      |      | GCGUCCAUUGUCUAAU | GUUCUGUCCAUCAGAU  | Cleava |   |
| 40      | 316    | 3   | .4 | 1 | 25 | 431  | 455  | GGAUAGGAC        | ACUGGACGC         | ge     | 1 |
| trf_2_2 | Bra007 | 16  |    |   |    |      |      | GCGUCCAUUGUCUAAU | AUCCGUCAGACAAUGG  | Cleava |   |
| 40      | 620    | 3   | .3 | 1 | 20 | 292  | 311  | GGAU             | AAGC              | ge     | 1 |
| trf_2_2 | Bra010 | 20  |    |   |    |      |      | GCGUCCAUUGUCUAAU | AUGCAUCAGAUAGUGG  | Cleava |   |
| 40      | 618    | 3   | .4 | 1 | 20 | 442  | 461  | GGAU             | ACGC              | ge     | 1 |
| trf_2_2 | Bra024 | 20  |    |   |    |      |      | GCGUCCAUUGUCUAAU | UUCUGUCCAUCAGAU   | Cleava |   |
| 41      | 316    | 3   | .4 | 1 | 24 | 432  | 455  | GGAUAGGA         | CUGGACGC          | ge     | 1 |
| trf_2_2 | Bra007 | 16  |    |   |    |      |      | GCGUCCAUUGUCUAAU | AUCCGUCAGACAAUGG  | Cleava |   |
| 41      | 620    | 3   | .3 | 1 | 20 | 292  | 311  | GGAU             | AAGC              | ge     | 1 |
| trf_2_2 | Bra010 | 20  |    |   |    |      |      | GCGUCCAUUGUCUAAU | AUGCAUCAGAUAGUGG  | Cleava |   |
| 41      | 618    | 3   | .4 | 1 | 20 | 442  | 461  | GGAU             | ACGC              | ge     | 1 |
| trf_2_2 | Bra007 | 14  |    |   |    |      |      | GCACCAGUGGUCUAGU | UUACUACUGGACCUUU  | Cleava |   |
| 44      | 154    | 2.5 | .1 | 1 | 21 | 510  | 530  | GGUAG            | GGUGC             | ge     | 1 |
| trf_2_2 | Bra000 | 11  |    |   |    |      |      | GUCUGGGUGGUGUAG  | GCUAACCAACUACACCA | Cleava |   |
| 45      | 881    | 2.5 | .0 | 1 | 24 | 162  | 185  | UCGGUUAUC        | UCCAGAA           | ge     | 1 |
| trf_2_2 | Bra040 | 13  |    |   |    |      |      | GUCUGGGUGGUGUAG  | AGCUGACUCCAUCACU  | Cleava |   |
| 45      | 072    | 3   | .8 | 1 | 21 | 504  | 524  | UCGGUU           | CAGAC             | ge     | 1 |
| trf_2_2 | Bra012 | 15  |    |   |    |      |      | GUCUGGGUGGUGUAG  | ACCGGUUGCACCGUCC  | Cleava |   |
| 45      | 326    | 3   | .0 | 1 | 20 | 1326 | 1345 | UCGGU            | GGAC              | ge     | 1 |
| trf_2_2 | Bra003 | 15  |    |   |    |      |      | GUCUGGGUGGUGUAG  | GCUCACCAGCUACACCA | Cleava |   |
| 45      | 121    | 3   | .1 | 1 | 24 | 760  | 783  | UCGGUUAUC        | CACAGAC           | ge     | 1 |
| trf_2_2 | Bra007 | 14  |    |   |    |      |      | GCACCAGUGGUCUAGU | UUACUACUGGACCUUU  | Cleava |   |
| 46      | 154    | 2.5 | .1 | 1 | 21 | 510  | 530  | GGUAG            | GGUGC             | ge     | 1 |
| trf_2_2 | Bra009 | 14  |    |   |    |      |      | GGGGAUGUAGCUCAGA | UUAUCAUCUGGGCUUC  | Cleava |   |
| 47      | 876    | 3   | .9 | 1 | 22 | 16   | 37   | UGGUAG           | GUCCUC            | ge     | 1 |
| trf_2_2 | Bra016 | 10  |    |   |    |      |      | GGGGAUGUAGCUCAGA | UUAUCAUCUGAGCUUC  | Cleava |   |
| 47      | 141    | 3   | .4 | 1 | 22 | 3031 | 3052 | UGGUAG           | GUUCUC            | ge     | 1 |
| trf_2_2 | Bra036 | 20  |    |   |    |      |      | GGGGAUGUAGCUCAGA | UCGACUGGCUGAGCUA  | Cleava |   |
| 47      | 771    | 3   | .2 | 1 | 23 | 5375 | 5397 | UGGUAGA          | CAUUCCU           | ge     | 1 |
| trf_2_2 | Bra018 | 8.  |    |   |    |      |      | GGGGAUGUAGCUCAGA | GCCACCUCAGCUACAUC | Cleava |   |
| 47      | 620    | 3   | 3  | 1 | 20 | 7    | 26   | UGGU             | CUC               | ge     | 1 |

|         |        |    |    |   |    |     |      |                  |                   |        |   |
|---------|--------|----|----|---|----|-----|------|------------------|-------------------|--------|---|
| trf_2_2 | Bra013 | 16 |    |   |    |     |      | UCCGUUGUCGUCCAGC | UAUGAUAAACCGAUGGA | Cleava |   |
| 48      | 584    | 3  | .4 | 1 | 26 | 885 | 910  | GGUUAGGAUA       | UGUCAAUGGA        | ge     | 1 |
| trf_2_2 | Bra000 | 11 |    |   |    |     |      | UCCGUUGUCGUCCAGC | UAACCGGAGGACGAUA  | Cleava |   |
| 48      | 529    | 3  | .2 | 1 | 21 | 984 | 1004 | GGUUA            | AUGGA             | ge     | 1 |
| trf_2_2 | Bra013 | 16 |    |   |    |     |      | UCCGUUGUCGUCCAGC | UAACCGAUGGAUGUCA  | Cleava |   |
| 50      | 584    | 3  | .4 | 1 | 21 | 890 | 910  | GGUUA            | AUGGA             | ge     | 1 |
| trf_2_2 | Bra000 | 11 |    |   |    |     |      | UCCGUUGUCGUCCAGC | UAACCGGAGGACGAUA  | Cleava |   |
| 50      | 529    | 3  | .2 | 1 | 21 | 984 | 1004 | GGUUA            | AUGGA             | ge     | 1 |
| trf_2_2 | Bra013 | 16 |    |   |    |     |      | UCCGUUGUCGUCCAGC | AUGAUAAACCGAUGGAU | Cleava |   |
| 51      | 584    | 3  | .4 | 1 | 25 | 886 | 910  | GGUUAGGAU        | GUCAAUGGA         | ge     | 1 |
| trf_2_2 | Bra000 | 11 |    |   |    |     |      | UCCGUUGUCGUCCAGC | UAACCGGAGGACGAUA  | Cleava |   |
| 51      | 529    | 3  | .2 | 1 | 21 | 984 | 1004 | GGUUA            | AUGGA             | ge     | 1 |
| trf_2_2 | Bra013 | 16 |    |   |    |     |      | UCCGUUGUCGUCCAGC | UAACCGAUGGAUGUCA  | Cleava |   |
| 53      | 584    | 3  | .4 | 1 | 21 | 890 | 910  | GGUUA            | AUGGA             | ge     | 1 |
| trf_2_2 | Bra000 | 11 |    |   |    |     |      | UCCGUUGUCGUCCAGC | UAACCGGAGGACGAUA  | Cleava |   |
| 53      | 529    | 3  | .2 | 1 | 21 | 984 | 1004 | GGUUA            | AUGGA             | ge     | 1 |
| trf_2_2 | Bra013 | 16 |    |   |    |     |      | UCCGUUGUCGUCCAGC | AACCGAUGGAUGUCA   | Cleava |   |
| 54      | 584    | 3  | .4 | 1 | 20 | 891 | 910  | GGUU             | UGGA              | ge     | 1 |
| trf_2_2 | Bra000 | 11 |    |   |    |     |      | UCCGUUGUCGUCCAGC | AACCGGAGGACGAUAA  | Cleava |   |
| 54      | 529    | 3  | .2 | 1 | 20 | 985 | 1004 | GGUU             | UGGA              | ge     | 1 |
| trf_2_2 | Bra013 | 16 |    |   |    |     |      | UCCGUUGUCGUCCAGC | UAACCGAUGGAUGUCA  | Cleava |   |
| 56      | 584    | 3  | .4 | 1 | 21 | 890 | 910  | GGUUA            | AUGGA             | ge     | 1 |
| trf_2_2 | Bra000 | 11 |    |   |    |     |      | UCCGUUGUCGUCCAGC | UAACCGGAGGACGAUA  | Cleava |   |
| 56      | 529    | 3  | .2 | 1 | 21 | 984 | 1004 | GGUUA            | AUGGA             | ge     | 1 |
| trf_2_2 | Bra013 | 16 |    |   |    |     |      | UCCGUUGUCGUCCAGC | UAUGAUAAACCGAUGGA | Cleava |   |
| 57      | 584    | 3  | .4 | 1 | 26 | 885 | 910  | GGUUAGGAUA       | UGUCAAUGGA        | ge     | 1 |
| trf_2_2 | Bra000 | 11 |    |   |    |     |      | UCCGUUGUCGUCCAGC | UAACCGGAGGACGAUA  | Cleava |   |
| 57      | 529    | 3  | .2 | 1 | 21 | 984 | 1004 | GGUUA            | AUGGA             | ge     | 1 |
| trf_2_2 | Bra014 | 17 |    |   |    |     |      | GGGGAUGUAGCUCAUA | UGUAUUUAUUAGCU    | Cleava |   |
| 58      | 507    | 3  | .0 | 1 | 23 | 541 | 563  | UGGUAGA          | AUAUCUCC          | ge     | 1 |
| trf_2_2 | Bra014 | 17 |    |   |    |     |      | GGGGAUGUAGCUCAUA | AUUUAUUUAGCUAUAU  | Cleava |   |
| 59      | 507    | 3  | .0 | 1 | 20 | 544 | 563  | UGGU             | CUCC              | ge     | 1 |
| trf_2_2 | Bra016 | 20 |    |   |    |     |      | UCCGUCGUAGUCUAGC | CUGAAGAAGCUAGGCU  | Cleava |   |
| 60      | 601    | 3  | .8 | 1 | 24 | 415 | 438  | UGGUUAGG         | GCGACGGA          | ge     | 1 |



|         |        |     |    |   |    |      |      |                  |                   |        |   |
|---------|--------|-----|----|---|----|------|------|------------------|-------------------|--------|---|
| trf_2_2 | Bra016 | 20  |    |   |    |      |      | UCCGUCGUAGUCUAGC | CUGAAGAAGCUAGGCU  | Cleava |   |
| 62      | 601    | 3   | .8 | 1 | 24 | 415  | 438  | UGGUUAGG         | GCGACGGA          | ge     | 1 |
| trf_2_2 | Bra016 | 20  |    |   |    |      |      | UCCGUCGUAGUCUAGC | AAGAAGCUAGGCUGCG  | Cleava |   |
| 63      | 601    | 3   | .8 | 1 | 21 | 418  | 438  | UGGUU            | ACGGA             | ge     | 1 |
| trf_2_2 | Bra016 | 20  |    |   |    |      |      | UCCGUCGUAGUCUAGC | CUGAAGAAGCUAGGCU  | Cleava |   |
| 65      | 601    | 3   | .8 | 1 | 24 | 415  | 438  | UGGUUAGG         | GCGACGGA          | ge     | 1 |
| trf_2_2 | Bra016 | 20  |    |   |    |      |      | UCCGUCGUAGUCUAGC | AAGAAGCUAGGCUGCG  | Cleava |   |
| 66      | 601    | 3   | .8 | 1 | 21 | 418  | 438  | UGGUU            | ACGGA             | ge     | 1 |
| trf_2_2 | Bra016 | 20  |    |   |    |      |      | UCCGUCGUAGUCUAGC | AAGAAGCUAGGCUGCG  | Cleava |   |
| 67      | 601    | 3   | .8 | 1 | 21 | 418  | 438  | UGGUU            | ACGGA             | ge     | 1 |
| trf_2_2 | Bra005 | 12  |    |   |    |      |      | GUGGCUGUAGUUUAG  | CUCACCGCUGAACUUAU | Cleava |   |
| 68      | 511    | 2.5 | .8 | 1 | 22 | 1113 | 1134 | UGGUGAG          | GGCUAC            | ge     | 1 |
| trf_2_2 | Bra035 | 17  |    |   |    |      |      | GUGGCUGUAGUUUAG  | UAUUCAUCUCUAGGCU  | Cleava |   |
| 68      | 454    | 3   | .9 | 1 | 24 | 1241 | 1264 | UGGUGAGAA        | ACAGCCAU          | ge     | 1 |
| trf_2_2 | Bra009 | 12  |    |   |    |      |      | GUGGCUGUAGUUUAG  | CAACAUUGAGCUACAG  | Cleava |   |
| 68      | 047    | 3   | .1 | 1 | 20 | 243  | 262  | UGGUG            | CCAU              | ge     | 1 |
| trf_2_2 | Bra009 | 14  |    |   |    |      |      | GGGGAUGUAGCUCAGA | UUAUCAUCUGGGCUUC  | Cleava |   |
| 69      | 876    | 3   | .9 | 1 | 22 | 16   | 37   | UGGUAG           | GUCCUC            | ge     | 1 |
| trf_2_2 | Bra016 | 10  |    |   |    |      |      | GGGGAUGUAGCUCAGA | UUAUCAUCUGAGCUUC  | Cleava |   |
| 69      | 141    | 3   | .4 | 1 | 22 | 3031 | 3052 | UGGUAG           | GUUCUC            | ge     | 1 |
| trf_2_2 | Bra036 | 20  |    |   |    |      |      | GGGGAUGUAGCUCAGA | UCGACUGGCUGAGCUA  | Cleava |   |
| 69      | 771    | 3   | .2 | 1 | 23 | 5375 | 5397 | UGGUAGA          | CAUUCCU           | ge     | 1 |
| trf_2_2 | Bra018 | 8.  |    |   |    |      |      | GGGGAUGUAGCUCAGA | GCCACCUCAGCUACAUC | Cleava |   |
| 69      | 620    | 3   | 3  | 1 | 20 | 7    | 26   | UGGU             | CUC               | ge     | 1 |
| trf_2_2 | Bra009 | 14  |    |   |    |      |      | GGGGAUGUAGCUCAGA | UUAUCAUCUGGGCUUC  | Cleava |   |
| 73      | 876    | 3   | .9 | 1 | 22 | 16   | 37   | UGGUAG           | GUCCUC            | ge     | 1 |
| trf_2_2 | Bra016 | 10  |    |   |    |      |      | GGGGAUGUAGCUCAGA | UUAUCAUCUGAGCUUC  | Cleava |   |
| 73      | 141    | 3   | .4 | 1 | 22 | 3031 | 3052 | UGGUAG           | GUUCUC            | ge     | 1 |
| trf_2_2 | Bra036 | 20  |    |   |    |      |      | GGGGAUGUAGCUCAGA | UCGACUGGCUGAGCUA  | Cleava |   |
| 73      | 771    | 3   | .2 | 1 | 23 | 5375 | 5397 | UGGUAGA          | CAUUCCU           | ge     | 1 |
| trf_2_2 | Bra018 | 8.  |    |   |    |      |      | GGGGAUGUAGCUCAGA | GCCACCUCAGCUACAUC | Cleava |   |
| 73      | 620    | 3   | 3  | 1 | 20 | 7    | 26   | UGGU             | CUC               | ge     | 1 |
| trf_2_2 | Bra020 | 9.  |    |   |    |      |      | GGGGGUGUAGCUCAUA | UUAUUACAUCAGCUAC  | Cleava |   |
| 75      | 835    | 3   | 5  | 1 | 22 | 5316 | 5337 | UGGUAG           | ACCCCC            | ge     | 1 |

|         |        |     |    |   |    |      |      |                  |                   |        |   |
|---------|--------|-----|----|---|----|------|------|------------------|-------------------|--------|---|
| trf_2_2 | Bra009 | 14  |    |   |    |      |      | GGGGAUGUAGCUCAGA | UUAUCAUCUGGGCUUC  | Cleava |   |
| 77      | 876    | 3   | .9 | 1 | 22 | 16   | 37   | UGGUAG           | GUCCUC            | ge     | 1 |
| trf_2_2 | Bra016 | 10  |    |   |    |      |      | GGGGAUGUAGCUCAGA | UUAUCAUCUGAGCUUC  | Cleava |   |
| 77      | 141    | 3   | .4 | 1 | 22 | 3031 | 3052 | UGGUAG           | GUUCUC            | ge     | 1 |
| trf_2_2 | Bra036 | 20  |    |   |    |      |      | GGGGAUGUAGCUCAGA | UCGACUGGCUGAGCUA  | Cleava |   |
| 77      | 771    | 3   | .2 | 1 | 23 | 5375 | 5397 | UGGUAGA          | CAUUCCU           | ge     | 1 |
| trf_2_2 | Bra018 | 8.  |    |   |    |      |      | GGGGAUGUAGCUCAGA | GCCACCUCAGCUACAUC | Cleava |   |
| 77      | 620    | 3   | 3  | 1 | 20 | 7    | 26   | UGGU             | CUC               | ge     | 1 |
| trf_2_2 | Bra009 | 14  |    |   |    |      |      | GGGGAUGUAGCUCAGA | UUAUCAUCUGGGCUUC  | Cleava |   |
| 79      | 876    | 3   | .9 | 1 | 22 | 16   | 37   | UGGUAG           | GUCCUC            | ge     | 1 |
| trf_2_2 | Bra016 | 10  |    |   |    |      |      | GGGGAUGUAGCUCAGA | UUAUCAUCUGAGCUUC  | Cleava |   |
| 79      | 141    | 3   | .4 | 1 | 22 | 3031 | 3052 | UGGUAG           | GUUCUC            | ge     | 1 |
| trf_2_2 | Bra036 | 20  |    |   |    |      |      | GGGGAUGUAGCUCAGA | UCGACUGGCUGAGCUA  | Cleava |   |
| 79      | 771    | 3   | .2 | 1 | 23 | 5375 | 5397 | UGGUAGA          | CAUUCCU           | ge     | 1 |
| trf_2_2 | Bra018 | 8.  |    |   |    |      |      | GGGGAUGUAGCUCAGA | GCCACCUCAGCUACAUC | Cleava |   |
| 79      | 620    | 3   | 3  | 1 | 20 | 7    | 26   | UGGU             | CUC               | ge     | 1 |
| trf_2_2 | Bra009 | 14  |    |   |    |      |      | GGGGAUGUAGCUCAGA | UUAUCAUCUGGGCUUC  | Cleava |   |
| 83      | 876    | 3   | .9 | 1 | 22 | 16   | 37   | UGGUAG           | GUCCUC            | ge     | 1 |
| trf_2_2 | Bra016 | 10  |    |   |    |      |      | GGGGAUGUAGCUCAGA | UUAUCAUCUGAGCUUC  | Cleava |   |
| 83      | 141    | 3   | .4 | 1 | 22 | 3031 | 3052 | UGGUAG           | GUUCUC            | ge     | 1 |
| trf_2_2 | Bra036 | 20  |    |   |    |      |      | GGGGAUGUAGCUCAGA | UCGACUGGCUGAGCUA  | Cleava |   |
| 83      | 771    | 3   | .2 | 1 | 23 | 5375 | 5397 | UGGUAGA          | CAUUCCU           | ge     | 1 |
| trf_2_2 | Bra018 | 8.  |    |   |    |      |      | GGGGAUGUAGCUCAGA | GCCACCUCAGCUACAUC | Cleava |   |
| 83      | 620    | 3   | 3  | 1 | 20 | 7    | 26   | UGGU             | CUC               | ge     | 1 |
| trf_2_2 | Bra007 | 14  |    |   |    |      |      | GCACCAGUGGUCUAGU | UUACUACUGGACCUUU  | Cleava |   |
| 84      | 154    | 2.5 | .1 | 1 | 21 | 510  | 530  | GGUAG            | GGUGC             | ge     | 1 |
| trf_2_2 | Bra009 | 14  |    |   |    |      |      | GGGGAUGUAGCUCAGA | UUAUCAUCUGGGCUUC  | Cleava |   |
| 87      | 876    | 3   | .9 | 1 | 22 | 16   | 37   | UGGUAG           | GUCCUC            | ge     | 1 |
| trf_2_2 | Bra016 | 10  |    |   |    |      |      | GGGGAUGUAGCUCAGA | UUAUCAUCUGAGCUUC  | Cleava |   |
| 87      | 141    | 3   | .4 | 1 | 22 | 3031 | 3052 | UGGUAG           | GUUCUC            | ge     | 1 |
| trf_2_2 | Bra036 | 20  |    |   |    |      |      | GGGGAUGUAGCUCAGA | UCGACUGGCUGAGCUA  | Cleava |   |
| 87      | 771    | 3   | .2 | 1 | 23 | 5375 | 5397 | UGGUAGA          | CAUUCCU           | ge     | 1 |
| trf_2_2 | Bra018 | 8.  |    |   |    |      |      | GGGGAUGUAGCUCAGA | GCCACCUCAGCUACAUC | Cleava |   |
| 87      | 620    | 3   | 3  | 1 | 20 | 7    | 26   | UGGU             | CUC               | ge     | 1 |

|         |        |    |    |   |    |      |      |                  |                   |        |   |
|---------|--------|----|----|---|----|------|------|------------------|-------------------|--------|---|
| trf_2_2 | Bra024 | 7. |    |   |    |      |      | GGGGAUGUAGCUCAAA | UCCAACAUUUCGGUU   | Cleava |   |
| 88      | 638    | 3  | 5  | 1 | 24 | 202  | 225  | UGGUAGAG         | ACAUCCCC          | ge     | 1 |
| trf_2_2 | Bra025 | 17 |    |   |    |      |      | GGGGAUGUAGCUCAAA | ACAAUUUGAGCUUCAU  | Cleava |   |
| 88      | 904    | 3  | .2 | 1 | 20 | 344  | 363  | UGGU             | CUUC              | ge     | 1 |
| trf_2_2 | Bra024 | 7. |    |   |    |      |      | GGGGAUGUAGCUCAAA | UCCAACAUUUCGGUUA  | Cleava |   |
| 89      | 638    | 3  | 5  | 1 | 23 | 203  | 225  | UGGUAGA          | CAUCCCC           | ge     | 1 |
| trf_2_2 | Bra025 | 17 |    |   |    |      |      | GGGGAUGUAGCUCAAA | ACAAUUUGAGCUUCAU  | Cleava |   |
| 89      | 904    | 3  | .2 | 1 | 20 | 344  | 363  | UGGU             | CUUC              | ge     | 1 |
| trf_2_2 | Bra009 | 14 |    |   |    |      |      | GGGGAUGUAGCUCAGA | UUAUCAUCUGGGCUUC  | Cleava |   |
| 90      | 876    | 3  | .9 | 1 | 22 | 16   | 37   | UGGUAG           | GUCCUC            | ge     | 1 |
| trf_2_2 | Bra016 | 10 |    |   |    |      |      | GGGGAUGUAGCUCAGA | UUAUCAUCUGAGCUUC  | Cleava |   |
| 90      | 141    | 3  | .4 | 1 | 22 | 3031 | 3052 | UGGUAG           | GUUCUC            | ge     | 1 |
| trf_2_2 | Bra036 | 20 |    |   |    |      |      | GGGGAUGUAGCUCAGA | UCGACUGGCUGAGCUA  | Cleava |   |
| 90      | 771    | 3  | .2 | 1 | 23 | 5375 | 5397 | UGGUAGA          | CAUUCCU           | ge     | 1 |
| trf_2_2 | Bra018 | 8. |    |   |    |      |      | GGGGAUGUAGCUCAGA | GCCACCUCAGCUACAUC | Cleava |   |
| 90      | 620    | 3  | 3  | 1 | 20 | 7    | 26   | UGGU             | CUC               | ge     | 1 |
| trf_2_3 | Bra009 | 14 |    |   |    |      |      | GGGGAUGUAGCUCAGA | UUAUCAUCUGGGCUUC  | Cleava |   |
| 01      | 876    | 3  | .9 | 1 | 22 | 16   | 37   | UGGUAG           | GUCCUC            | ge     | 1 |
| trf_2_3 | Bra016 | 10 |    |   |    |      |      | GGGGAUGUAGCUCAGA | UUAUCAUCUGAGCUUC  | Cleava |   |
| 01      | 141    | 3  | .4 | 1 | 22 | 3031 | 3052 | UGGUAG           | GUUCUC            | ge     | 1 |
| trf_2_3 | Bra036 | 20 |    |   |    |      |      | GGGGAUGUAGCUCAGA | UCGACUGGCUGAGCUA  | Cleava |   |
| 01      | 771    | 3  | .2 | 1 | 23 | 5375 | 5397 | UGGUAGA          | CAUUCCU           | ge     | 1 |
| trf_2_3 | Bra018 | 8. |    |   |    |      |      | GGGGAUGUAGCUCAGA | GCCACCUCAGCUACAUC | Cleava |   |
| 01      | 620    | 3  | 3  | 1 | 20 | 7    | 26   | UGGU             | CUC               | ge     | 1 |
| trf_2_3 | Bra036 | 20 |    |   |    |      |      | GGGGAUGUAGCUCAGA | CUCGACUGGCUGAGCU  | Cleava |   |
| 02      | 771    | 3  | .2 | 1 | 24 | 5374 | 5397 | UGGUAGAG         | ACAUUCCU          | ge     | 1 |
| trf_2_3 | Bra009 | 14 |    |   |    |      |      | GGGGAUGUAGCUCAGA | CGUUAUCAUCUGGGCU  | Cleava |   |
| 02      | 876    | 3  | .9 | 1 | 24 | 14   | 37   | UGGUAGAG         | UCGUCCUC          | ge     | 1 |
| trf_2_3 | Bra016 | 10 |    |   |    |      |      | GGGGAUGUAGCUCAGA | CAUUAUCAUCUGAGCU  | Cleava |   |
| 02      | 141    | 3  | .4 | 1 | 24 | 3029 | 3052 | UGGUAGAG         | UCGUUCUC          | ge     | 1 |
| trf_2_3 | Bra018 | 8. |    |   |    |      |      | GGGGAUGUAGCUCAGA | GCCACCUCAGCUACAUC | Cleava |   |
| 02      | 620    | 3  | 3  | 1 | 20 | 7    | 26   | UGGU             | CUC               | ge     | 1 |
| trf_2_3 | Bra009 | 14 |    |   |    |      |      | GGGGAUGUAGCUCAGA | UUAUCAUCUGGGCUUC  | Cleava |   |
| 06      | 876    | 3  | .9 | 1 | 22 | 16   | 37   | UGGUAG           | GUCCUC            | ge     | 1 |

|         |        |    |    |   |    |      |      |                  |                   |        |   |
|---------|--------|----|----|---|----|------|------|------------------|-------------------|--------|---|
| trf_2_3 | Bra016 | 10 |    |   |    |      |      | GGGGAUGUAGCUCAGA | UUAUCAUCUGAGCUUC  | Cleava |   |
| 06      | 141    | 3  | .4 | 1 | 22 | 3031 | 3052 | UGGUAG           | GUUCUC            | ge     | 1 |
| trf_2_3 | Bra036 | 20 |    |   |    |      |      | GGGGAUGUAGCUCAGA | UCGACUGGCUGAGCUA  | Cleava |   |
| 06      | 771    | 3  | .2 | 1 | 23 | 5375 | 5397 | UGGUAGA          | CAUUCCU           | ge     | 1 |
| trf_2_3 | Bra018 | 8. |    |   |    |      |      | GGGGAUGUAGCUCAGA | GCCACCUCAGCUACAUC | Cleava |   |
| 06      | 620    | 3  | 3  | 1 | 20 | 7    | 26   | UGGU             | CUC               | ge     | 1 |
| trf_2_3 | Bra009 | 14 |    |   |    |      |      | GGGGAUGUAGCUCAGA | GCGUUAUCAUCUGGGC  | Cleava |   |
| 07      | 876    | 3  | .9 | 1 | 25 | 13   | 37   | UGGUAGAGC        | UUCGUCCUC         | ge     | 1 |
| trf_2_3 | Bra036 | 20 |    |   |    |      |      | GGGGAUGUAGCUCAGA | CUCGACUGGCUGAGCU  | Cleava |   |
| 07      | 771    | 3  | .2 | 1 | 24 | 5374 | 5397 | UGGUAGAG         | ACAUUCCU          | ge     | 1 |
| trf_2_3 | Bra016 | 10 |    |   |    |      |      | GGGGAUGUAGCUCAGA | CAUUAUCAUCUGAGCU  | Cleava |   |
| 07      | 141    | 3  | .4 | 1 | 24 | 3029 | 3052 | UGGUAGAG         | UCGUUCUC          | ge     | 1 |
| trf_2_3 | Bra018 | 8. |    |   |    |      |      | GGGGAUGUAGCUCAGA | GCCACCUCAGCUACAUC | Cleava |   |
| 07      | 620    | 3  | 3  | 1 | 20 | 7    | 26   | UGGU             | CUC               | ge     | 1 |
| trf_2_3 | Bra024 | 7. |    |   |    |      |      | GGGGAUGUAGCUCAA  | UCCAACAUUUCGGUUA  | Cleava |   |
| 08      | 638    | 3  | 5  | 1 | 23 | 203  | 225  | UGGUAGA          | CAUCCCC           | ge     | 1 |
| trf_2_3 | Bra025 | 17 |    |   |    |      |      | GGGGAUGUAGCUCAA  | ACAAUUUGAGCUUCAU  | Cleava |   |
| 08      | 904    | 3  | .2 | 1 | 20 | 344  | 363  | UGGU             | CUUC              | ge     | 1 |
| trf_2_3 | Bra009 | 14 |    |   |    |      |      | GGGGAUGUAGCUCAGA | UUAUCAUCUGGGCUUC  | Cleava |   |
| 10      | 876    | 3  | .9 | 1 | 22 | 16   | 37   | UGGUAG           | GUCCUC            | ge     | 1 |
| trf_2_3 | Bra016 | 10 |    |   |    |      |      | GGGGAUGUAGCUCAGA | UUAUCAUCUGAGCUUC  | Cleava |   |
| 10      | 141    | 3  | .4 | 1 | 22 | 3031 | 3052 | UGGUAG           | GUUCUC            | ge     | 1 |
| trf_2_3 | Bra036 | 20 |    |   |    |      |      | GGGGAUGUAGCUCAGA | UCGACUGGCUGAGCUA  | Cleava |   |
| 10      | 771    | 3  | .2 | 1 | 23 | 5375 | 5397 | UGGUAGA          | CAUUCCU           | ge     | 1 |
| trf_2_3 | Bra018 | 8. |    |   |    |      |      | GGGGAUGUAGCUCAGA | GCCACCUCAGCUACAUC | Cleava |   |
| 10      | 620    | 3  | 3  | 1 | 20 | 7    | 26   | UGGU             | CUC               | ge     | 1 |
| trf_2_3 | Bra009 | 14 |    |   |    |      |      | GGGGAUGUAGCUCAGA | GCGUUAUCAUCUGGGC  | Cleava |   |
| 11      | 876    | 3  | .9 | 1 | 25 | 13   | 37   | UGGUAGAGC        | UUCGUCCUC         | ge     | 1 |
| trf_2_3 | Bra036 | 20 |    |   |    |      |      | GGGGAUGUAGCUCAGA | CUCGACUGGCUGAGCU  | Cleava |   |
| 11      | 771    | 3  | .2 | 1 | 24 | 5374 | 5397 | UGGUAGAG         | ACAUUCCU          | ge     | 1 |
| trf_2_3 | Bra016 | 10 |    |   |    |      |      | GGGGAUGUAGCUCAGA | CAUUAUCAUCUGAGCU  | Cleava |   |
| 11      | 141    | 3  | .4 | 1 | 24 | 3029 | 3052 | UGGUAGAG         | UCGUUCUC          | ge     | 1 |
| trf_2_3 | Bra018 | 8. |    |   |    |      |      | GGGGAUGUAGCUCAGA | GCCACCUCAGCUACAUC | Cleava |   |
| 11      | 620    | 3  | 3  | 1 | 20 | 7    | 26   | UGGU             | CUC               | ge     | 1 |

|         |        |    |    |   |    |      |      |                  |                   |        |   |
|---------|--------|----|----|---|----|------|------|------------------|-------------------|--------|---|
| trf_2_3 | Bra009 | 14 |    |   |    |      |      | GGGGAUGUAGCUCAGA | UUAUCAUCUGGGCUUC  | Cleava |   |
| 12      | 876    | 3  | .9 | 1 | 22 | 16   | 37   | UGGUAG           | GUCCUC            | ge     | 1 |
| trf_2_3 | Bra016 | 10 |    |   |    |      |      | GGGGAUGUAGCUCAGA | UUAUCAUCUGAGCUUC  | Cleava |   |
| 12      | 141    | 3  | .4 | 1 | 22 | 3031 | 3052 | UGGUAG           | GUUCUC            | ge     | 1 |
| trf_2_3 | Bra036 | 20 |    |   |    |      |      | GGGGAUGUAGCUCAGA | UCGACUGGCUGAGCUA  | Cleava |   |
| 12      | 771    | 3  | .2 | 1 | 23 | 5375 | 5397 | UGGUAGA          | CAUUCCU           | ge     | 1 |
| trf_2_3 | Bra018 | 8. |    |   |    |      |      | GGGGAUGUAGCUCAGA | GCCACCUCAGCUACAUC | Cleava |   |
| 12      | 620    | 3  | 3  | 1 | 20 | 7    | 26   | UGGU             | CUC               | ge     | 1 |
| trf_2_3 | Bra014 | 17 |    |   |    |      |      | GGGGAUGUAGCUCAUA | UGUAUUUAUUAGCU    | Cleava |   |
| 14      | 507    | 3  | .0 | 1 | 23 | 541  | 563  | UGGUAGA          | AUAUCUCC          | ge     | 1 |
| trf_2_3 | Bra014 | 17 |    |   |    |      |      | GGGGAUGUAGCUCAUA | AUUUAUUUAGCUAUAU  | Cleava |   |
| 15      | 507    | 3  | .0 | 1 | 20 | 544  | 563  | UGGU             | CUCC              | ge     | 1 |
| trf_2_3 | Bra009 | 14 |    |   |    |      |      | GGGGAUGUAGCUCAGA | UUAUCAUCUGGGCUUC  | Cleava |   |
| 16      | 876    | 3  | .9 | 1 | 22 | 16   | 37   | UGGUAG           | GUCCUC            | ge     | 1 |
| trf_2_3 | Bra016 | 10 |    |   |    |      |      | GGGGAUGUAGCUCAGA | UUAUCAUCUGAGCUUC  | Cleava |   |
| 16      | 141    | 3  | .4 | 1 | 22 | 3031 | 3052 | UGGUAG           | GUUCUC            | ge     | 1 |
| trf_2_3 | Bra036 | 20 |    |   |    |      |      | GGGGAUGUAGCUCAGA | UCGACUGGCUGAGCUA  | Cleava |   |
| 16      | 771    | 3  | .2 | 1 | 23 | 5375 | 5397 | UGGUAGA          | CAUUCCU           | ge     | 1 |
| trf_2_3 | Bra018 | 8. |    |   |    |      |      | GGGGAUGUAGCUCAGA | GCCACCUCAGCUACAUC | Cleava |   |
| 16      | 620    | 3  | 3  | 1 | 20 | 7    | 26   | UGGU             | CUC               | ge     | 1 |
| trf_2_3 | Bra009 | 14 |    |   |    |      |      | GGGGAUGUAGCUCAGA | UUAUCAUCUGGGCUUC  | Cleava |   |
| 17      | 876    | 3  | .9 | 1 | 22 | 16   | 37   | UGGUAG           | GUCCUC            | ge     | 1 |
| trf_2_3 | Bra016 | 10 |    |   |    |      |      | GGGGAUGUAGCUCAGA | UUAUCAUCUGAGCUUC  | Cleava |   |
| 17      | 141    | 3  | .4 | 1 | 22 | 3031 | 3052 | UGGUAG           | GUUCUC            | ge     | 1 |
| trf_2_3 | Bra036 | 20 |    |   |    |      |      | GGGGAUGUAGCUCAGA | UCGACUGGCUGAGCUA  | Cleava |   |
| 17      | 771    | 3  | .2 | 1 | 23 | 5375 | 5397 | UGGUAGA          | CAUUCCU           | ge     | 1 |
| trf_2_3 | Bra018 | 8. |    |   |    |      |      | GGGGAUGUAGCUCAGA | GCCACCUCAGCUACAUC | Cleava |   |
| 17      | 620    | 3  | 3  | 1 | 20 | 7    | 26   | UGGU             | CUC               | ge     | 1 |
| trf_2_3 | Bra009 | 14 |    |   |    |      |      | GGGGAUGUAGCUCAGA | UUAUCAUCUGGGCUUC  | Cleava |   |
| 18      | 876    | 3  | .9 | 1 | 22 | 16   | 37   | UGGUAG           | GUCCUC            | ge     | 1 |
| trf_2_3 | Bra016 | 10 |    |   |    |      |      | GGGGAUGUAGCUCAGA | UUAUCAUCUGAGCUUC  | Cleava |   |
| 18      | 141    | 3  | .4 | 1 | 22 | 3031 | 3052 | UGGUAG           | GUUCUC            | ge     | 1 |
| trf_2_3 | Bra036 | 20 |    |   |    |      |      | GGGGAUGUAGCUCAGA | UCGACUGGCUGAGCUA  | Cleava |   |
| 18      | 771    | 3  | .2 | 1 | 23 | 5375 | 5397 | UGGUAGA          | CAUUCCU           | ge     | 1 |

|         |        |     |    |   |    |     |     |                  |                   |        |   |
|---------|--------|-----|----|---|----|-----|-----|------------------|-------------------|--------|---|
| trf_2_3 | Bra018 | 8.  |    |   |    |     |     | GGGGAUGUAGCUCAGA | GCCACCUCAGCUACAUC | Cleava |   |
| 18      | 620    | 3   | 3  | 1 | 20 | 7   | 26  | UGGU             | CUC               | ge     | 1 |
| trf_2_3 | Bra007 | 14  |    |   |    |     |     | GCACCAGUGGUCUAGU | UUACUACUGGACCUUU  | Cleava |   |
| 19      | 154    | 2.5 | .1 | 1 | 21 | 510 | 530 | GGUAG            | GGUGC             | ge     | 1 |
| trf_2_3 | Bra003 | 16  |    |   |    |     |     | GGGAUUGUAGUUCAA  | AACCAGUUGAAUUACA  | Cleava |   |
| 20      | 753    | 2.5 | .2 | 1 | 21 | 283 | 303 | UUGGCU           | AUCCU             | ge     | 1 |
| trf_2_3 | Bra003 | 16  |    |   |    |     |     | GGGAUUGUAGUUCAA  | ACCAGUUGAAUUACAA  | Cleava |   |
| 21      | 753    | 1.5 | .2 | 1 | 20 | 284 | 303 | UUGGU            | UCCU              | ge     | 1 |
| trf_2_3 | Bra013 | 19  |    |   |    |     |     | GGGAUUGUAGUUCAA  | ACUAAUUGAACUAAGA  | Cleava |   |
| 21      | 336    | 3   | .5 | 1 | 20 | 267 | 286 | UUGGU            | UCUC              | ge     | 1 |
| trf_2_3 | Bra021 | 23  |    |   |    |     |     | GGGAUUGUAGUUCAA  | ACCAACUGAACUGCAA  | Cleava |   |
| 21      | 314    | 3   | .2 | 1 | 20 | 234 | 253 | UUGGU            | UCUG              | ge     | 1 |
| trf_2_3 | Bra003 | 16  |    |   |    |     |     | GGGAUUGUAGUUCAA  | ACCAGUUGAAUUACAA  | Cleava |   |
| 22      | 753    | 1.5 | .2 | 1 | 20 | 284 | 303 | UUGGU            | UCCU              | ge     | 1 |
| trf_2_3 | Bra013 | 19  |    |   |    |     |     | GGGAUUGUAGUUCAA  | ACUAAUUGAACUAAGA  | Cleava |   |
| 22      | 336    | 3   | .5 | 1 | 20 | 267 | 286 | UUGGU            | UCUC              | ge     | 1 |
| trf_2_3 | Bra021 | 23  |    |   |    |     |     | GGGAUUGUAGUUCAA  | ACCAACUGAACUGCAA  | Cleava |   |
| 22      | 314    | 3   | .2 | 1 | 20 | 234 | 253 | UUGGU            | UCUG              | ge     | 1 |
| trf_2_3 | Bra003 | 16  |    |   |    |     |     | GGGAUUGUAGUUCAA  | ACCAGUUGAAUUACAA  | Cleava |   |
| 23      | 753    | 1.5 | .2 | 1 | 20 | 284 | 303 | UUGGU            | UCCU              | ge     | 1 |
| trf_2_3 | Bra013 | 19  |    |   |    |     |     | GGGAUUGUAGUUCAA  | ACUAAUUGAACUAAGA  | Cleava |   |
| 23      | 336    | 3   | .5 | 1 | 20 | 267 | 286 | UUGGU            | UCUC              | ge     | 1 |
| trf_2_3 | Bra021 | 23  |    |   |    |     |     | GGGAUUGUAGUUCAA  | ACCAACUGAACUGCAA  | Cleava |   |
| 23      | 314    | 3   | .2 | 1 | 20 | 234 | 253 | UUGGU            | UCUG              | ge     | 1 |
| trf_2_3 | Bra003 | 16  |    |   |    |     |     | GGGAUUGUAGUUCAA  | ACCAGUUGAAUUACAA  | Cleava |   |
| 25      | 753    | 1.5 | .2 | 1 | 20 | 284 | 303 | UUGGU            | UCCU              | ge     | 1 |
| trf_2_3 | Bra013 | 19  |    |   |    |     |     | GGGAUUGUAGUUCAA  | ACUAAUUGAACUAAGA  | Cleava |   |
| 25      | 336    | 3   | .5 | 1 | 20 | 267 | 286 | UUGGU            | UCUC              | ge     | 1 |
| trf_2_3 | Bra021 | 23  |    |   |    |     |     | GGGAUUGUAGUUCAA  | ACCAACUGAACUGCAA  | Cleava |   |
| 25      | 314    | 3   | .2 | 1 | 20 | 234 | 253 | UUGGU            | UCUG              | ge     | 1 |
| trf_2_3 | Bra003 | 16  |    |   |    |     |     | GGGAUUGUAGUUCAA  | ACCAGUUGAAUUACAA  | Cleava |   |
| 26      | 753    | 2.5 | .2 | 1 | 20 | 284 | 303 | UCGGU            | UCCU              | ge     | 1 |
| trf_2_3 | Bra003 | 16  |    |   |    |     |     | GGGAUUGUAGUUCAA  | ACCAGUUGAAUUACAA  | Cleava |   |
| 27      | 753    | 1.5 | .2 | 1 | 20 | 284 | 303 | UUGGU            | UCCU              | ge     | 1 |

|         |        |     |    |   |    |     |     |               |                  |          |   |
|---------|--------|-----|----|---|----|-----|-----|---------------|------------------|----------|---|
| trf_2_3 | Bra013 | 19  |    |   |    |     |     | GGGAUUGUAGUUC | ACUAAUUGAACUAAGA | Cleavage |   |
| 27      | 336    | 3   | .5 | 1 | 20 | 267 | 286 | UUGGU         | UCUC             | ge       | 1 |
| trf_2_3 | Bra021 | 23  |    |   |    |     |     | GGGAUUGUAGUUC | ACCAACUGAACUGCAA | Cleavage |   |
| 27      | 314    | 3   | .2 | 1 | 20 | 234 | 253 | UUGGU         | UCUG             | ge       | 1 |
| trf_2_3 | Bra003 | 16  |    |   |    |     |     | GGGAUUGUAGUUC | ACCAGUUGAAUUACAA | Cleavage |   |
| 28      | 753    | 2.5 | .2 | 1 | 20 | 284 | 303 | UUGGC         | UCCU             | ge       | 1 |
| trf_2_3 | Bra003 | 16  |    |   |    |     |     | GGGAUUGUAGUUC | ACCAGUUGAAUUACAA | Cleavage |   |
| 29      | 753    | 2.5 | .2 | 1 | 20 | 284 | 303 | UCGGU         | UCCU             | ge       | 1 |
| trf_2_3 | Bra003 | 16  |    |   |    |     |     | GGGAUUGUAGUUC | ACCAGUUGAAUUACAA | Cleavage |   |
| 30      | 753    | 2.5 | .2 | 1 | 20 | 284 | 303 | UUGGA         | UCCU             | ge       | 1 |
| trf_2_3 | Bra003 | 16  |    |   |    |     |     | GGGAUUGUAGUUC | ACCAGUUGAAUUACAA | Cleavage |   |
| 31      | 753    | 1.5 | .2 | 1 | 20 | 284 | 303 | UUGGU         | UCCU             | ge       | 1 |
| trf_2_3 | Bra013 | 19  |    |   |    |     |     | GGGAUUGUAGUUC | ACUAAUUGAACUAAGA | Cleavage |   |
| 31      | 336    | 3   | .5 | 1 | 20 | 267 | 286 | UUGGU         | UCUC             | ge       | 1 |
| trf_2_3 | Bra021 | 23  |    |   |    |     |     | GGGAUUGUAGUUC | ACCAACUGAACUGCAA | Cleavage |   |
| 31      | 314    | 3   | .2 | 1 | 20 | 234 | 253 | UUGGU         | UCUG             | ge       | 1 |
| trf_2_3 | Bra003 | 16  |    |   |    |     |     | GGGAUUGUAGUUC | AACCAGUUGAAUUACA | Cleavage |   |
| 33      | 753    | 1.5 | .2 | 1 | 21 | 283 | 303 | UUGGUU        | AUCCU            | ge       | 1 |
| trf_2_3 | Bra013 | 19  |    |   |    |     |     | GGGAUUGUAGUUC | AACUAAUUGAACUAAG | Cleavage |   |
| 33      | 336    | 3   | .5 | 1 | 21 | 266 | 286 | UUGGUU        | AUCUC            | ge       | 1 |
| trf_2_3 | Bra021 | 23  |    |   |    |     |     | GGGAUUGUAGUUC | ACCAACUGAACUGCAA | Cleavage |   |
| 33      | 314    | 3   | .2 | 1 | 20 | 234 | 253 | UUGGU         | UCUG             | ge       | 1 |
| trf_2_3 | Bra003 | 16  |    |   |    |     |     | GGGAUUGUAGUUC | ACCAGUUGAAUUACAA | Cleavage |   |
| 34      | 753    | 1.5 | .2 | 1 | 20 | 284 | 303 | UUGGU         | UCCU             | ge       | 1 |
| trf_2_3 | Bra013 | 19  |    |   |    |     |     | GGGAUUGUAGUUC | ACUAAUUGAACUAAGA | Cleavage |   |
| 34      | 336    | 3   | .5 | 1 | 20 | 267 | 286 | UUGGU         | UCUC             | ge       | 1 |
| trf_2_3 | Bra021 | 23  |    |   |    |     |     | GGGAUUGUAGUUC | ACCAACUGAACUGCAA | Cleavage |   |
| 34      | 314    | 3   | .2 | 1 | 20 | 234 | 253 | UUGGU         | UCUG             | ge       | 1 |
| trf_2_3 | Bra003 | 16  |    |   |    |     |     | GGGAUUGUAGUUC | ACCAGUUGAAUUACAA | Cleavage |   |
| 36      | 753    | 2.5 | .2 | 1 | 20 | 284 | 303 | UUGGC         | UCCU             | ge       | 1 |
| trf_2_3 | Bra003 | 16  |    |   |    |     |     | GGGAUUGUAGUUC | ACCAGUUGAAUUACAA | Cleavage |   |
| 37      | 753    | 2.5 | .2 | 1 | 20 | 284 | 303 | UUGGC         | UCCU             | ge       | 1 |
| trf_2_3 | Bra003 | 16  |    |   |    |     |     | GGGAUUGUAGUUC | AACCAGUUGAAUUACA | Cleavage |   |
| 38      | 753    | 2.5 | .2 | 1 | 21 | 283 | 303 | UUGGAU        | AUCCU            | ge       | 1 |

|         |        |     |    |   |    |      |      |                  |                  |          |   |
|---------|--------|-----|----|---|----|------|------|------------------|------------------|----------|---|
| trf_2_3 | Bra003 | 16  |    |   |    |      |      | GGGAUUGUAGUUCAA  | ACCAGUUGAAUUACAA | Cleavage |   |
| 39      | 753    | 2.5 | .2 | 1 | 20 | 284  | 303  | UCGGU            | UCCU             | ge       | 1 |
| trf_2_3 | Bra003 | 16  |    |   |    |      |      | GGGAUUGUAGUUCAA  | ACCAGUUGAAUUACAA | Cleavage |   |
| 40      | 753    | 1.5 | .2 | 1 | 20 | 284  | 303  | UUGGU            | UCCU             | ge       | 1 |
| trf_2_3 | Bra013 | 19  |    |   |    |      |      | GGGAUUGUAGUUCAA  | ACUAAUUGAACUAAGA | Cleavage |   |
| 40      | 336    | 3   | .5 | 1 | 20 | 267  | 286  | UUGGU            | UCUC             | ge       | 1 |
| trf_2_3 | Bra021 | 23  |    |   |    |      |      | GGGAUUGUAGUUCAA  | ACCAACUGAACUGCAA | Cleavage |   |
| 40      | 314    | 3   | .2 | 1 | 20 | 234  | 253  | UUGGU            | UCUG             | ge       | 1 |
| trf_2_3 | Bra003 | 16  |    |   |    |      |      | GGGAUUGUAGUUCAA  | ACCAGUUGAAUUACAA | Cleavage |   |
| 41      | 753    | 2.5 | .2 | 1 | 20 | 284  | 303  | UCGGU            | UCCU             | ge       | 1 |
| trf_2_3 | Bra003 | 16  |    |   |    |      |      | GGGAUUGUAGUUCAA  | ACCAGUUGAAUUACAA | Cleavage |   |
| 42      | 753    | 2.5 | .2 | 1 | 20 | 284  | 303  | UCGGU            | UCCU             | ge       | 1 |
| trf_2_3 | Bra003 | 16  |    |   |    |      |      | GGGAUUGUAGUUCAA  | ACCAGUUGAAUUACAA | Cleavage |   |
| 43      | 753    | 1.5 | .2 | 1 | 20 | 284  | 303  | UUGGU            | UCCU             | ge       | 1 |
| trf_2_3 | Bra013 | 19  |    |   |    |      |      | GGGAUUGUAGUUCAA  | ACUAAUUGAACUAAGA | Cleavage |   |
| 43      | 336    | 3   | .5 | 1 | 20 | 267  | 286  | UUGGU            | UCUC             | ge       | 1 |
| trf_2_3 | Bra021 | 23  |    |   |    |      |      | GGGAUUGUAGUUCAA  | ACCAACUGAACUGCAA | Cleavage |   |
| 43      | 314    | 3   | .2 | 1 | 20 | 234  | 253  | UUGGU            | UCUG             | ge       | 1 |
| trf_2_3 | Bra003 | 16  |    |   |    |      |      | GGGAUUGUAGUUCAA  | ACCAGUUGAAUUACAA | Cleavage |   |
| 45      | 753    | 2.5 | .2 | 1 | 20 | 284  | 303  | UUGGG            | UCCU             | ge       | 1 |
| trf_2_3 | Bra009 | 15  |    |   |    |      |      | GGGAUUGUAGUUCAA  | CUCAGUUGAACUUCAA | Cleavage |   |
| 45      | 115    | 3   | .2 | 1 | 20 | 602  | 621  | UUGGG            | UCCA             | ge       | 1 |
| trf_2_3 | Bra003 | 16  |    |   |    |      |      | GGGAUUGUAGUUCAA  | ACCAGUUGAAUUACAA | Cleavage |   |
| 46      | 753    | 2.5 | .2 | 1 | 20 | 284  | 303  | UUGGG            | UCCU             | ge       | 1 |
| trf_2_3 | Bra009 | 15  |    |   |    |      |      | GGGAUUGUAGUUCAA  | CUCAGUUGAACUUCAA | Cleavage |   |
| 46      | 115    | 3   | .2 | 1 | 20 | 602  | 621  | UUGGG            | UCCA             | ge       | 1 |
| trf_2_3 | Bra010 | 20  |    |   |    |      |      | GCUUCAGUAGCUCGGA | GUCAUCCGAGCUGAUG | Cleavage |   |
| 52      | 153    | 2.5 | .4 | 1 | 20 | 850  | 869  | UGGC             | AAGC             | ge       | 1 |
| trf_2_3 | Bra035 | 17  |    |   |    |      |      | GCUUCAGUAGCUCGGA | GCUGUCUGAGUUACUG | Cleavage |   |
| 52      | 649    | 3   | .6 | 1 | 20 | 423  | 442  | UGGC             | AAGA             | ge       | 1 |
| trf_2_3 | Bra016 | 16  |    |   |    |      |      | GCUUCAGUAGCUCGGA | GCCAUCCAGGUUGCUG | Cleavage |   |
| 52      | 307    | 2.5 | .1 | 1 | 20 | 1153 | 1172 | UGGC             | AAGC             | ge       | 1 |
| trf_2_3 | Bra029 | 21  |    |   |    |      |      | GCUUCAGUAGCUCGGA | ACUAACCGGGCUACUG | Cleavage |   |
| 52      | 313    | 3   | .3 | 1 | 20 | 262  | 281  | UGGC             | AAGC             | ge       | 1 |



|         |        |    |    |   |    |      |      |                  |                   |        |   |
|---------|--------|----|----|---|----|------|------|------------------|-------------------|--------|---|
| trf_2_3 | Bra018 | 12 |    |   |    |      |      | GCUUCAGUAGCUCGGA | GGCAUCUGAGCUACUA  | Cleava |   |
| 52      | 588    | 3  | .1 | 1 | 20 | 897  | 916  | UGGC             | AAGC              | ge     | 1 |
| trf_2_3 | Bra032 | 23 |    |   |    |      |      | GCUUCAGUAGCUCGGA | GAUGUUCGAGCUGCUG  | Cleava |   |
| 52      | 316    | 3  | .9 | 1 | 20 | 880  | 899  | UGGC             | AAGC              | ge     | 1 |
| trf_2_3 | Bra008 | 20 |    |   |    |      |      | GCUUCAGUAGCUCGGA | GUCAUCGCAGCUGCUG  | Cleava |   |
| 52      | 784    | 3  | .8 | 1 | 20 | 1057 | 1076 | UGGC             | AAGC              | ge     | 1 |
| trf_2_3 | Bra014 | 17 |    |   |    |      |      | GGGGAUGUAGCUCAUA | UGUAUUAUUAUAGCU   | Cleava |   |
| 55      | 507    | 3  | .0 | 1 | 23 | 541  | 563  | UGGUAGA          | AUAUCUCC          | ge     | 1 |
| trf_2_3 | Bra009 | 14 |    |   |    |      |      | GGGGAUGUAGCUCAGA | UUAUCAUCUGGGCUUC  | Cleava |   |
| 56      | 876    | 3  | .9 | 1 | 22 | 16   | 37   | UGGUAG           | GUCCUC            | ge     | 1 |
| trf_2_3 | Bra016 | 10 |    |   |    |      |      | GGGGAUGUAGCUCAGA | UUAUCAUCUGAGCUUC  | Cleava |   |
| 56      | 141    | 3  | .4 | 1 | 22 | 3031 | 3052 | UGGUAG           | GUUCUC            | ge     | 1 |
| trf_2_3 | Bra036 | 20 |    |   |    |      |      | GGGGAUGUAGCUCAGA | UCGACUGGCUGAGCUA  | Cleava |   |
| 56      | 771    | 3  | .2 | 1 | 23 | 5375 | 5397 | UGGUAGA          | CAUUCCU           | ge     | 1 |
| trf_2_3 | Bra018 | 8. |    |   |    |      |      | GGGGAUGUAGCUCAGA | GCCACCUCAGCUACAUC | Cleava |   |
| 56      | 620    | 3  | 3  | 1 | 20 | 7    | 26   | UGGU             | CUC               | ge     | 1 |
| trf_2_3 | Bra009 | 14 |    |   |    |      |      | GGGGAUGUAGCUCAGA | UUAUCAUCUGGGCUUC  | Cleava |   |
| 57      | 876    | 3  | .9 | 1 | 22 | 16   | 37   | UGGUAG           | GUCCUC            | ge     | 1 |
| trf_2_3 | Bra016 | 10 |    |   |    |      |      | GGGGAUGUAGCUCAGA | UUAUCAUCUGAGCUUC  | Cleava |   |
| 57      | 141    | 3  | .4 | 1 | 22 | 3031 | 3052 | UGGUAG           | GUUCUC            | ge     | 1 |
| trf_2_3 | Bra036 | 20 |    |   |    |      |      | GGGGAUGUAGCUCAGA | UCGACUGGCUGAGCUA  | Cleava |   |
| 57      | 771    | 3  | .2 | 1 | 23 | 5375 | 5397 | UGGUAGA          | CAUUCCU           | ge     | 1 |
| trf_2_3 | Bra018 | 8. |    |   |    |      |      | GGGGAUGUAGCUCAGA | GCCACCUCAGCUACAUC | Cleava |   |
| 57      | 620    | 3  | 3  | 1 | 20 | 7    | 26   | UGGU             | CUC               | ge     | 1 |
| trf_2_3 | Bra014 | 17 |    |   |    |      |      | GGGGAUGUAGCUCAUA | UGUAUUAUUAUAGCU   | Cleava |   |
| 58      | 507    | 3  | .0 | 1 | 23 | 541  | 563  | UGGUAGA          | AUAUCUCC          | ge     | 1 |
| trf_2_3 | Bra014 | 17 |    |   |    |      |      | GGGGAUGUAGCUCAUA | AUUAUUAUAGCUAUAU  | Cleava |   |
| 59      | 507    | 3  | .0 | 1 | 20 | 544  | 563  | UGGU             | CUCC              | ge     | 1 |
| trf_2_3 | Bra009 | 14 |    |   |    |      |      | GGGGAUGUAGCUCAGA | UUAUCAUCUGGGCUUC  | Cleava |   |
| 60      | 876    | 3  | .9 | 1 | 22 | 16   | 37   | UGGUAG           | GUCCUC            | ge     | 1 |
| trf_2_3 | Bra016 | 10 |    |   |    |      |      | GGGGAUGUAGCUCAGA | UUAUCAUCUGAGCUUC  | Cleava |   |
| 60      | 141    | 3  | .4 | 1 | 22 | 3031 | 3052 | UGGUAG           | GUUCUC            | ge     | 1 |
| trf_2_3 | Bra036 | 20 |    |   |    |      |      | GGGGAUGUAGCUCAGA | UCGACUGGCUGAGCUA  | Cleava |   |
| 60      | 771    | 3  | .2 | 1 | 23 | 5375 | 5397 | UGGUAGA          | CAUUCCU           | ge     | 1 |

|         |        |     |    |   |    |     |      |                  |                   |        |   |
|---------|--------|-----|----|---|----|-----|------|------------------|-------------------|--------|---|
| trf_2_3 | Bra018 | 8.  |    |   |    |     |      | GGGGAUGUAGCUCAGA | GCCACCUCAGCUACAUC | Cleava |   |
| 60      | 620    | 3   | 3  | 1 | 20 | 7   | 26   | UGGU             | CUC               | ge     | 1 |
| trf_2_3 | Bra013 | 16  |    |   |    |     |      | UCCGUUGUCGUCCAGC | UAACCGAUGGAUGUCA  | Cleava |   |
| 70      | 584    | 3   | .4 | 1 | 21 | 890 | 910  | GGUUA            | AUGGA             | ge     | 1 |
| trf_2_3 | Bra000 | 11  |    |   |    |     |      | UCCGUUGUCGUCCAGC | UAACCGGAGGACGAUA  | Cleava |   |
| 70      | 529    | 3   | .2 | 1 | 21 | 984 | 1004 | GGUUA            | AUGGA             | ge     | 1 |
| trf_2_3 | Bra013 | 16  |    |   |    |     |      | UCCGUUGUCGUCCAGC | AUGAUAACCGAUGGAU  | Cleava |   |
| 71      | 584    | 3   | .4 | 1 | 25 | 886 | 910  | GGUUAGGAU        | GUCAAUGGA         | ge     | 1 |
| trf_2_3 | Bra000 | 11  |    |   |    |     |      | UCCGUUGUCGUCCAGC | UAACCGGAGGACGAUA  | Cleava |   |
| 71      | 529    | 3   | .2 | 1 | 21 | 984 | 1004 | GGUUA            | AUGGA             | ge     | 1 |
| trf_2_3 | Bra013 | 16  |    |   |    |     |      | UCCGUUGUCGUCCAGC | UAACCGAUGGAUGUCA  | Cleava |   |
| 73      | 584    | 3   | .4 | 1 | 21 | 890 | 910  | GGUUA            | AUGGA             | ge     | 1 |
| trf_2_3 | Bra000 | 11  |    |   |    |     |      | UCCGUUGUCGUCCAGC | UAACCGGAGGACGAUA  | Cleava |   |
| 73      | 529    | 3   | .2 | 1 | 21 | 984 | 1004 | GGUUA            | AUGGA             | ge     | 1 |
| trf_2_3 | Bra013 | 16  |    |   |    |     |      | UCCGUUGUCGUCCAGC | UAUGAUAACCGAUGGA  | Cleava |   |
| 74      | 584    | 3   | .4 | 1 | 26 | 885 | 910  | GGUUAGGAUA       | UGUCAAUGGA        | ge     | 1 |
| trf_2_3 | Bra000 | 11  |    |   |    |     |      | UCCGUUGUCGUCCAGC | UAACCGGAGGACGAUA  | Cleava |   |
| 74      | 529    | 3   | .2 | 1 | 21 | 984 | 1004 | GGUUA            | AUGGA             | ge     | 1 |
| trf_2_3 | Bra013 | 16  |    |   |    |     |      | UCCGUUGUCGUCCAGC | AACCGAUGGAUGUCAA  | Cleava |   |
| 77      | 584    | 3   | .4 | 1 | 20 | 891 | 910  | GGUU             | UGGA              | ge     | 1 |
| trf_2_3 | Bra000 | 11  |    |   |    |     |      | UCCGUUGUCGUCCAGC | AACCGGAGGACGAUAA  | Cleava |   |
| 77      | 529    | 3   | .2 | 1 | 20 | 985 | 1004 | GGUU             | UGGA              | ge     | 1 |
| trf_2_3 | Bra013 | 16  |    |   |    |     |      | UCCGUUGUCGUCCAGC | UAACCGAUGGAUGUCA  | Cleava |   |
| 78      | 584    | 3   | .4 | 1 | 21 | 890 | 910  | GGUUA            | AUGGA             | ge     | 1 |
| trf_2_3 | Bra000 | 11  |    |   |    |     |      | UCCGUUGUCGUCCAGC | UAACCGGAGGACGAUA  | Cleava |   |
| 78      | 529    | 3   | .2 | 1 | 21 | 984 | 1004 | GGUUA            | AUGGA             | ge     | 1 |
| trf_2_3 | Bra013 | 16  |    |   |    |     |      | UCCGUUGUCGUCCAGC | UAUGAUAACCGAUGGA  | Cleava |   |
| 79      | 584    | 3   | .4 | 1 | 26 | 885 | 910  | GGUUAGGAUA       | UGUCAAUGGA        | ge     | 1 |
| trf_2_3 | Bra000 | 11  |    |   |    |     |      | UCCGUUGUCGUCCAGC | UAACCGGAGGACGAUA  | Cleava |   |
| 79      | 529    | 3   | .2 | 1 | 21 | 984 | 1004 | GGUUA            | AUGGA             | ge     | 1 |
| trf_2_3 | Bra007 | 14  |    |   |    |     |      | GCACCAGUGGUCUAGU | UUACUACUGGACCUUU  | Cleava |   |
| 80      | 154    | 2.5 | .1 | 1 | 21 | 510 | 530  | GGUAG            | GGUGC             | ge     | 1 |
| trf_2_3 | Bra016 | 20  |    |   |    |     |      | UCCGUUGUCGUCCAGC | AAGAAGCUAGGCUGCG  | Cleava |   |
| 81      | 601    | 3   | .8 | 1 | 21 | 418 | 438  | UGGUU            | ACGGA             | ge     | 1 |

|         |        |    |    |   |    |      |      |                  |                  |        |   |
|---------|--------|----|----|---|----|------|------|------------------|------------------|--------|---|
| trf_2_3 | Bra016 | 20 |    |   |    |      |      | UCCGUCGUAGUCUAGC | CUGAAGAAGCUAGGCU | Cleava |   |
| 82      | 601    | 3  | .8 | 1 | 24 | 415  | 438  | UGGUUAGG         | GCGACGGA         | ge     | 1 |
| trf_2_3 | Bra016 | 20 |    |   |    |      |      | UCCGUCGUAGUCUAGC | AAGAAGCUAGGCUGCG | Cleava |   |
| 84      | 601    | 3  | .8 | 1 | 21 | 418  | 438  | UGGUU            | ACGGA            | ge     | 1 |
| trf_2_3 | Bra016 | 20 |    |   |    |      |      | UCCGUCGUAGUCUAGC | CUGAAGAAGCUAGGCU | Cleava |   |
| 86      | 601    | 3  | .8 | 1 | 24 | 415  | 438  | UGGUUAGG         | GCGACGGA         | ge     | 1 |
| trf_2_3 | Bra016 | 20 |    |   |    |      |      | UCCGUCGUAGUCUAGC | CUGAAGAAGCUAGGCU | Cleava |   |
| 87      | 601    | 3  | .8 | 1 | 24 | 415  | 438  | UGGUUAGG         | GCGACGGA         | ge     | 1 |
| trf_2_3 | Bra024 | 7. |    |   |    |      |      | GGGGAUGUAGCUCAA  | UUCCAACAUUUCGGUU | Cleava |   |
| 88      | 638    | 3  | 5  | 1 | 24 | 202  | 225  | UGGUAGAG         | ACAUCCCC         | ge     | 1 |
| trf_2_3 | Bra025 | 17 |    |   |    |      |      | GGGGAUGUAGCUCAA  | ACAAUUUGAGCUUCAU | Cleava |   |
| 88      | 904    | 3  | .2 | 1 | 20 | 344  | 363  | UGGU             | CUUC             | ge     | 1 |
| trf_2_3 | Bra024 | 7. |    |   |    |      |      | GGGGAUGUAGCUCAA  | UCCAACAUUUCGGUUA | Cleava |   |
| 89      | 638    | 3  | 5  | 1 | 23 | 203  | 225  | UGGUAGA          | CAUCCCC          | ge     | 1 |
| trf_2_3 | Bra025 | 17 |    |   |    |      |      | GGGGAUGUAGCUCAA  | ACAAUUUGAGCUUCAU | Cleava |   |
| 89      | 904    | 3  | .2 | 1 | 20 | 344  | 363  | UGGU             | CUUC             | ge     | 1 |
| trf_2_3 | Bra016 | 20 |    |   |    |      |      | UCCGUCGUAGUCUAGC | CUGAAGAAGCUAGGCU | Cleava |   |
| 90      | 601    | 3  | .8 | 1 | 24 | 415  | 438  | UGGUUAGG         | GCGACGGA         | ge     | 1 |
| trf_2_3 | Bra016 | 20 |    |   |    |      |      | UCCGUCGUAGUCUAGC | CUGAAGAAGCUAGGCU | Cleava |   |
| 91      | 601    | 3  | .8 | 1 | 24 | 415  | 438  | UGGUUAGG         | GCGACGGA         | ge     | 1 |
| trf_2_3 | Bra016 | 20 |    |   |    |      |      | UCCGUCGUAGUCUAGC | AAGAAGCUAGGCUGCG | Cleava |   |
| 92      | 601    | 3  | .8 | 1 | 21 | 418  | 438  | UGGUU            | ACGGA            | ge     | 1 |
| trf_2_3 | Bra016 | 20 |    |   |    |      |      | UCCGUCGUAGUCUAGC | AAGAAGCUAGGCUGCG | Cleava |   |
| 94      | 601    | 3  | .8 | 1 | 21 | 418  | 438  | UGGUU            | ACGGA            | ge     | 1 |
| trf_2_3 | Bra016 | 20 |    |   |    |      |      | UCCGUCGUAGUCUAGC | CUGAAGAAGCUAGGCU | Cleava |   |
| 95      | 601    | 3  | .8 | 1 | 24 | 415  | 438  | UGGUUAGG         | GCGACGGA         | ge     | 1 |
| trf_2_4 | Bra013 | 22 |    |   |    |      |      | UCCGUUGUAGUCUAGC | AUCAGCUUGGCUAUAA | Cleava |   |
| 06      | 528    | 3  | .0 | 1 | 20 | 200  | 219  | UGGU             | CGGG             | ge     | 1 |
| trf_2_4 | Bra029 | 20 |    |   |    |      |      | GCUGGAGUAGCUCAGU | GUCAGCUGAGCUACUC | Cleava |   |
| 07      | 975    | 3  | .8 | 1 | 20 | 1245 | 1264 | UGGU             | AAGC             | ge     | 1 |
| trf_2_4 | Bra003 | 16 |    |   |    |      |      | GCUGGAGUAGCUCAGU | CCUAACGGAGCUGCUC | Cleava |   |
| 07      | 013    | 3  | .5 | 1 | 20 | 319  | 338  | UGGU             | CAGC             | ge     | 1 |
| trf_2_4 | Bra003 | 23 |    |   |    |      |      | GCUGGAGUAGCUCAGU | ACCAACCGGGCUACUG | Cleava |   |
| 07      | 602    | 3  | .1 | 1 | 20 | 274  | 293  | UGGU             | CAGC             | ge     | 1 |

|         |        |     |    |   |    |      |      |                   |                   |        |   |
|---------|--------|-----|----|---|----|------|------|-------------------|-------------------|--------|---|
| trf_2_4 | Bra003 | 23  |    |   |    |      |      | GCUGGAGUAGCUCAGU  | AACCAACCGGGCUACU  | Cleava |   |
| 08      | 602    | 3   | .1 | 1 | 21 | 273  | 293  | UGGUU             | GCAGC             | ge     | 1 |
| trf_2_4 | Bra029 | 20  |    |   |    |      |      | GCUGGAGUAGCUCAGU  | GGUCAGCUGAGCUACU  | Cleava |   |
| 08      | 975    | 3   | .8 | 1 | 21 | 1244 | 1264 | UGGUU             | CAAGC             | ge     | 1 |
| trf_2_4 | Bra003 | 16  |    |   |    |      |      | GCUGGAGUAGCUCAGU  | CCU AACGGAGCUGCUC | Cleava |   |
| 08      | 013    | 3   | .5 | 1 | 20 | 319  | 338  | UGGU              | CAGC              | ge     | 1 |
| trf_2_4 | Bra005 | 12  |    |   |    |      |      | GUGGCUGUAGUUUAG   | CUCACCGCUGAACU AU | Cleava |   |
| 09      | 511    | 2.5 | .8 | 1 | 22 | 1113 | 1134 | UGGUGAG           | GGCUAC            | ge     | 1 |
| trf_2_4 | Bra035 | 17  |    |   |    |      |      | GUGGCUGUAGUUUAG   | UAUUCAUCUCUAGGCU  | Cleava |   |
| 09      | 454    | 3   | .9 | 1 | 24 | 1241 | 1264 | UGGUGAGAA         | ACAGCCAU          | ge     | 1 |
| trf_2_4 | Bra009 | 12  |    |   |    |      |      | GUGGCUGUAGUUUAG   | CAACAUUGAGCUACAG  | Cleava |   |
| 09      | 047    | 3   | .1 | 1 | 20 | 243  | 262  | UGGUG             | CCAU              | ge     | 1 |
| trf_2_4 | Bra007 | 14  |    |   |    |      |      | GCACCAGUGGUCUAGU  | UUACUACUGGACCUUU  | Cleava |   |
| 11      | 154    | 2.5 | .1 | 1 | 21 | 510  | 530  | GGUAG             | GGUGC             | ge     | 1 |
| trf_2_4 | Bra013 | 22  |    |   |    |      |      | UCCGUUGUAGUCUAGC  | CAUCAUCAGCUUGGCU  | Cleava |   |
| 20      | 528    | 3   | .0 | 1 | 24 | 196  | 219  | UGGUCAGG          | AUAACGGG          | ge     | 1 |
| trf_2_4 | Bra024 | 7.  |    |   |    |      |      | GGGGAUGUAGCUCAA   | UCCAACAUUUCGGUUA  | Cleava |   |
| 33      | 638    | 3   | 5  | 1 | 23 | 203  | 225  | UGGUAGA           | CAUCCCC           | ge     | 1 |
| trf_2_4 | Bra025 | 17  |    |   |    |      |      | GGGGAUGUAGCUCAA   | ACAAUUUGAGCUUCAU  | Cleava |   |
| 33      | 904    | 3   | .2 | 1 | 20 | 344  | 363  | UGGU              | CUUC              | ge     | 1 |
| trf_2_4 | Bra013 | 22  |    |   |    |      |      | UCCGUUGUAGUCUAGC  | CAUCAUCAGCUUGGCU  | Cleava |   |
| 35      | 528    | 3   | .0 | 1 | 24 | 196  | 219  | UGGUCAGG          | AUAACGGG          | ge     | 1 |
| trf_2_4 | Bra034 | 21  |    |   |    |      |      | UUAGGUUCAA AUCCUA | UGCGAUAGGAUUUGG   | Cleava |   |
| 45      | 278    | 3   | .9 | 1 | 21 | 2430 | 2450 | UUGGA             | ACCU GG           | ge     | 1 |
| trf_2_4 | Bra019 | 16  |    |   |    |      |      | UUAGGUUCAA AUCCUA | CCAAUUGGAUUUGAUC  | Cleava |   |
| 45      | 452    | 2.5 | .5 | 1 | 20 | 970  | 989  | UUGG              | CUAA              | ge     | 1 |
| trf_2_4 | Bra021 | 14  |    |   |    |      |      | UUAGGUUCAA AUCCUA | UGCAAUAGGAUUUAGA  | Cleava |   |
| 45      | 441    | 3   | .8 | 1 | 21 | 759  | 779  | UUGGA             | CCUAG             | ge     | 1 |
| trf_2_4 | Bra036 | 17  |    |   |    |      |      | AGGUUCAAAUCCUAUU  | GAGUCCAAUGUGGUUU  | Cleava |   |
| 46      | 447    | 2.5 | .4 | 1 | 22 | 804  | 825  | GGACGC            | GAGCCU            | ge     | 1 |
| trf_2_4 | Bra034 | 22  |    |   |    |      |      | AGGUUCAAAUCCUAUU  | CUGCGAUAGGAUUUGG  | Cleava |   |
| 46      | 278    | 3   | .4 | 1 | 20 | 2429 | 2448 | GGAC              | ACCU              | ge     | 1 |
|         | Bra033 | 21  |    |   |    |      |      | GGGGAUGUAGCUCAA   | CUGGACCCUUUGGGUA  | Transl |   |
| trf_2_1 | 370    | 3   | .6 | 1 | 24 | 4746 | 4769 | UGGUAGAG          | ACAUCCCC          | ation  | 1 |

|         |        |     |    |   |    |      |      |                  |                  |        |   |
|---------|--------|-----|----|---|----|------|------|------------------|------------------|--------|---|
| trf_2_2 | Bra033 | 21  |    |   |    |      |      | GGGGAUGUAGCUCAAA | ACCCUUUGGGUAACAU | Transl |   |
|         | 370    | 3   | .6 | 1 | 20 | 4750 | 4769 | UGGU             | CCCC             | ation  | 1 |
|         | Bra037 | 22  |    |   |    |      |      | UCCGUUAUCGUCCAGC | AACCGCUGUCUGAUAA | Transl |   |
| trf_2_3 | 748    | 2.5 | .8 | 1 | 20 | 566  | 585  | GGUU             | CGGA             | ation  | 1 |
|         | Bra037 | 22  |    |   |    |      |      | UCCGUUAUCGUCCAGC | GUUGAAACCGCUGUCU | Transl |   |
| trf_2_4 | 748    | 2.5 | .8 | 1 | 25 | 561  | 585  | GGUUAGGAU        | GAUAACGGA        | ation  | 1 |
|         | Bra037 | 22  |    |   |    |      |      | UCCGUUAUCGUCCAGC | AACCGCUGUCUGAUAA | Transl |   |
| trf_2_5 | 748    | 2.5 | .8 | 1 | 20 | 566  | 585  | GGUU             | CGGA             | ation  | 1 |
|         | Bra037 | 22  |    |   |    |      |      | UCCGUUAUCGUCCAGC | GUUGAAACCGCUGUCU | Transl |   |
| trf_2_7 | 748    | 2.5 | .8 | 1 | 25 | 561  | 585  | GGUUAGGAU        | GAUAACGGA        | ation  | 1 |
| trf_2_1 | Bra037 | 22  |    |   |    |      |      | UCCGUUAUCGUCCAGC | AACCGCUGUCUGAUAA | Transl |   |
| 1       | 748    | 2.5 | .8 | 1 | 20 | 566  | 585  | GGUU             | CGGA             | ation  | 1 |
| trf_2_1 | Bra037 | 22  |    |   |    |      |      | UCCGUUAUCGUCCAGC | AACCGCUGUCUGAUAA | Transl |   |
| 2       | 748    | 2.5 | .8 | 1 | 20 | 566  | 585  | GGUU             | CGGA             | ation  | 1 |
| trf_2_1 | Bra037 | 22  |    |   |    |      |      | UCCGUUAUCGUCCAGC | GUUGAAACCGCUGUCU | Transl |   |
| 3       | 748    | 2.5 | .8 | 1 | 25 | 561  | 585  | GGUUAGGAU        | GAUAACGGA        | ation  | 1 |
| trf_2_1 | Bra037 | 14  |    |   |    |      |      | UCCGUUGUAGUCUAGC | UGACUGGUUAGGCCAC | Transl |   |
| 4       | 499    | 3   | .7 | 1 | 22 | 174  | 195  | UGGUUA           | AACGGA           | ation  | 1 |
| trf_2_1 | Bra037 | 14  |    |   |    |      |      | UCCGUUGUAGUCUAGC | UGACUGGUUAGGCCAC | Transl |   |
| 5       | 499    | 3   | .7 | 1 | 22 | 174  | 195  | UGGUUA           | AACGGA           | ation  | 1 |
| trf_2_1 | Bra033 | 21  |    |   |    |      |      | GGGGAUGUAGCUCAAA | ACCCUUUGGGUAACAU | Transl |   |
| 6       | 370    | 3   | .6 | 1 | 20 | 4750 | 4769 | UGGU             | CCCC             | ation  | 1 |
| trf_2_2 | Bra033 | 21  |    |   |    |      |      | GGGGAUGUAGCUCAAA | ACCCUUUGGGUAACAU | Transl |   |
| 6       | 370    | 3   | .6 | 1 | 20 | 4750 | 4769 | UGGU             | CCCC             | ation  | 1 |
| trf_2_3 | Bra037 | 14  |    |   |    |      |      | UCCGUUGUAGUCUAGC | UGACUGGUUAGGCCAC | Transl |   |
| 7       | 499    | 3   | .7 | 1 | 22 | 174  | 195  | UGGUCA           | AACGGA           | ation  | 1 |
| trf_2_3 | Bra036 | 13  |    |   |    |      |      | GUGGCUGUAGUUUAG  | CAACACUAAAGUGCAG | Transl |   |
| 8       | 328    | 3   | .8 | 1 | 20 | 708  | 727  | UGGUG            | CUAC             | ation  | 1 |
| trf_2_5 | Bra015 | 24  |    |   |    |      |      | AUCAGAGUGGCGCAGC | CGUUUCCACUGCACCA | Transl |   |
| 4       | 824    | 3   | .0 | 1 | 23 | 916  | 938  | GGAAGCG          | CUCUGAC          | ation  | 1 |
| trf_2_5 | Bra033 | 18  |    |   |    |      |      | AUCAGAGUGGCGCAGC | UUACGUUGCACCACUU | Transl |   |
| 4       | 352    | 3   | .3 | 1 | 20 | 590  | 609  | GGAA             | UGAU             | ation  | 1 |
| trf_2_7 | Bra012 | 16  |    |   |    |      |      | GGUCCAUUGGUCUAGC | AACUGCUACUCCAUGG | Transl |   |
| 2       | 946    | 3   | .6 | 1 | 20 | 957  | 976  | GGUU             | GACU             | ation  | 1 |

|         |        |     |    |   |    |      |      |                  |                   |        |   |
|---------|--------|-----|----|---|----|------|------|------------------|-------------------|--------|---|
| trf_2_7 | Bra037 | 14  |    |   |    |      |      | UCCGUUGUAGUCUAGC | ACUGGUUAGGCCACAA  | Transl |   |
| 3       | 499    | 3   | .7 | 1 | 20 | 176  | 195  | UGGU             | CGGA              | ation  | 1 |
| trf_2_7 | Bra020 | 15  |    |   |    |      |      | UCCGUUGUCGUCCAGC | CCAACUGCUGGAAGAC  | Transl |   |
| 7       | 153    | 2.5 | .4 | 1 | 22 | 1953 | 1974 | GGUUAG           | AAUGGG            | ation  | 1 |
| trf_2_7 | Bra012 | 18  |    |   |    |      |      | UCCGUUGUCGUCCAGC | AAUCGCUGAACCACAAC | Transl |   |
| 7       | 143    | 2.5 | .5 | 1 | 20 | 392  | 411  | GGUU             | GGA               | ation  | 1 |
| trf_2_7 | Bra037 | 22  |    |   |    |      |      | UCCGUUGUCGUCCAGC | GUUGAAACCGCUGUCU  | Transl |   |
| 7       | 748    | 3   | .8 | 1 | 25 | 561  | 585  | GGUUAGGAU        | GAUAACGGA         | ation  | 1 |
| trf_2_7 | Bra020 | 15  |    |   |    |      |      | UCCGUUGUCGUCCAGC | CCAACUGCUGGAAGAC  | Transl |   |
| 8       | 153    | 2.5 | .4 | 1 | 22 | 1953 | 1974 | GGUUAG           | AAUGGG            | ation  | 1 |
| trf_2_7 | Bra012 | 18  |    |   |    |      |      | UCCGUUGUCGUCCAGC | AAUCGCUGAACCACAAC | Transl |   |
| 8       | 143    | 2.5 | .5 | 1 | 20 | 392  | 411  | GGUU             | GGA               | ation  | 1 |
| trf_2_7 | Bra037 | 22  |    |   |    |      |      | UCCGUUGUCGUCCAGC | AACCGCUGUCUGAUAA  | Transl |   |
| 8       | 748    | 3   | .8 | 1 | 20 | 566  | 585  | GGUU             | CGGA              | ation  | 1 |
| trf_2_8 | Bra020 | 15  |    |   |    |      |      | UCCGUUGUCGUCCAGC | CCAACUGCUGGAAGAC  | Transl |   |
| 0       | 153    | 2.5 | .4 | 1 | 22 | 1953 | 1974 | GGUUAG           | AAUGGG            | ation  | 1 |
| trf_2_8 | Bra012 | 18  |    |   |    |      |      | UCCGUUGUCGUCCAGC | AAUCGCUGAACCACAAC | Transl |   |
| 0       | 143    | 2.5 | .5 | 1 | 20 | 392  | 411  | GGUU             | GGA               | ation  | 1 |
| trf_2_8 | Bra037 | 22  |    |   |    |      |      | UCCGUUGUCGUCCAGC | AACCGCUGUCUGAUAA  | Transl |   |
| 0       | 748    | 3   | .8 | 1 | 20 | 566  | 585  | GGUU             | CGGA              | ation  | 1 |
| trf_2_8 | Bra020 | 15  |    |   |    |      |      | UCCGUUGUCGUCCAGC | AACUGCUGGAAGACAA  | Transl |   |
| 1       | 153    | 2.5 | .4 | 1 | 20 | 1955 | 1974 | GGUU             | UGGG              | ation  | 1 |
| trf_2_8 | Bra012 | 18  |    |   |    |      |      | UCCGUUGUCGUCCAGC | AAUCGCUGAACCACAAC | Transl |   |
| 1       | 143    | 2.5 | .5 | 1 | 20 | 392  | 411  | GGUU             | GGA               | ation  | 1 |
| trf_2_8 | Bra037 | 22  |    |   |    |      |      | UCCGUUGUCGUCCAGC | AACCGCUGUCUGAUAA  | Transl |   |
| 1       | 748    | 3   | .8 | 1 | 20 | 566  | 585  | GGUU             | CGGA              | ation  | 1 |
| trf_2_8 | Bra020 | 15  |    |   |    |      |      | UCCGUUGUCGUCCAGC | CCAACUGCUGGAAGAC  | Transl |   |
| 3       | 153    | 2.5 | .4 | 1 | 22 | 1953 | 1974 | GGUUAG           | AAUGGG            | ation  | 1 |
| trf_2_8 | Bra012 | 18  |    |   |    |      |      | UCCGUUGUCGUCCAGC | AAUCGCUGAACCACAAC | Transl |   |
| 3       | 143    | 2.5 | .5 | 1 | 20 | 392  | 411  | GGUU             | GGA               | ation  | 1 |
| trf_2_8 | Bra037 | 22  |    |   |    |      |      | UCCGUUGUCGUCCAGC | GUUGAAACCGCUGUCU  | Transl |   |
| 3       | 748    | 3   | .8 | 1 | 25 | 561  | 585  | GGUUAGGAU        | GAUAACGGA         | ation  | 1 |
| trf_2_8 | Bra020 | 15  |    |   |    |      |      | UCCGUUGUCGUCCAGC | CCAACUGCUGGAAGAC  | Transl |   |
| 5       | 153    | 2.5 | .4 | 1 | 22 | 1953 | 1974 | GGUUAG           | AAUGGG            | ation  | 1 |

|         |        |     |    |   |    |      |      |                  |                   |        |   |
|---------|--------|-----|----|---|----|------|------|------------------|-------------------|--------|---|
| trf_2_8 | Bra012 | 18  |    |   |    |      |      | UCCGUUGUCGUCCAGC | AAUCGCUGAACCACAAC | Transl |   |
| 5       | 143    | 2.5 | .5 | 1 | 20 | 392  | 411  | GGUU             | GGA               | ation  | 1 |
| trf_2_8 | Bra037 | 22  |    |   |    |      |      | UCCGUUGUCGUCCAGC | AACCGCUGUCUGAUAA  | Transl |   |
| 5       | 748    | 3   | .8 | 1 | 20 | 566  | 585  | GGUU             | CGGA              | ation  | 1 |
| trf_2_8 | Bra020 | 15  |    |   |    |      |      | UCCGUUGUCGUCCAGC | CCAACUGCUGGAAGAC  | Transl |   |
| 6       | 153    | 2.5 | .4 | 1 | 22 | 1953 | 1974 | GGUUAG           | AAUGGG            | ation  | 1 |
| trf_2_8 | Bra012 | 18  |    |   |    |      |      | UCCGUUGUCGUCCAGC | AAUCGCUGAACCACAAC | Transl |   |
| 6       | 143    | 2.5 | .5 | 1 | 20 | 392  | 411  | GGUU             | GGA               | ation  | 1 |
| trf_2_8 | Bra037 | 22  |    |   |    |      |      | UCCGUUGUCGUCCAGC | GUUGAAACCGCUGUCU  | Transl |   |
| 6       | 748    | 3   | .8 | 1 | 25 | 561  | 585  | GGUUAGGAU        | GAUAACGGA         | ation  | 1 |
| trf_2_9 | Bra036 | 13  |    |   |    |      |      | GUGGCUGUAGUUUAG  | CAACACUAAAGUGCAG  | Transl |   |
| 7       | 328    | 3   | .8 | 1 | 20 | 708  | 727  | UGGUG            | CUAC              | ation  | 1 |
| trf_2_9 | Bra003 | 7.  |    |   |    |      |      | GUGGCUGUAGUUUAG  | UACCAUUAA-        | Transl |   |
| 7       | 191    | 3   | 6  | 1 | 20 | 27   | 45   | UGGUG            | CUACAGCCAC        | ation  | 1 |
| trf_2_9 | Bra036 | 13  |    |   |    |      |      | GUGGCUGUAGUUUAG  | CAACACUAAAGUGCAG  | Transl |   |
| 8       | 328    | 3   | .8 | 1 | 20 | 708  | 727  | UGGUG            | CUAC              | ation  | 1 |
| trf_2_1 | Bra013 | 11  |    |   |    |      |      | GUCUGGGUGGUGUAG  | AACCGACUCCACAAUUC | Transl |   |
| 00      | 558    | 3   | .8 | 1 | 21 | 165  | 185  | UCGGUU           | AGAC              | ation  | 1 |
| trf_2_1 | Bra033 | 21  |    |   |    |      |      | GGGGAUGUAGCUCAA  | ACCCUUUGGGUAACAU  | Transl |   |
| 16      | 370    | 3   | .6 | 1 | 20 | 4750 | 4769 | UGGU             | CCCC              | ation  | 1 |
| trf_2_1 | Bra033 | 21  |    |   |    |      |      | GGGGAUGUAGCUCAA  | ACCCUUUGGGUAACAU  | Transl |   |
| 20      | 370    | 3   | .6 | 1 | 20 | 4750 | 4769 | UGGU             | CCCC              | ation  | 1 |
| trf_2_1 | Bra033 | 21  |    |   |    |      |      | GGGGAUGUAGCUCAA  | CUGGACCCUUUGGGUA  | Transl |   |
| 21      | 370    | 3   | .6 | 1 | 24 | 4746 | 4769 | UGGUAGAG         | ACAUCCCC          | ation  | 1 |
| trf_2_1 | Bra037 | 12  |    |   |    |      |      | GACGGUUUGGCCGAGU | UUGACUACUCGUCCAA  | Transl |   |
| 22      | 152    | 3   | .2 | 1 | 22 | 478  | 499  | GGUCUA           | ACCCUC            | ation  | 1 |
| trf_2_1 | Bra018 | 7.  |    |   |    |      |      | GACGGUUUGGCCGAGU | CCCAAGACCACUCCUCG | Transl |   |
| 22      | 257    | 3   | 1  | 1 | 25 | 27   | 51   | GGUCUAAGG        | AAACCGUC          | ation  | 1 |
| trf_2_1 | Bra012 | 16  |    |   |    |      |      | GGUCCCAUGGUCUAGC | AACUGCUACUCCAUGG  | Transl |   |
| 23      | 946    | 3   | .6 | 1 | 20 | 957  | 976  | GGUU             | GACU              | ation  | 1 |
| trf_2_1 | Bra012 | 16  |    |   |    |      |      | GGUCCCAUGGUCUAGC | AACUGCUACUCCAUGG  | Transl |   |
| 24      | 946    | 3   | .6 | 1 | 20 | 957  | 976  | GGUU             | GACU              | ation  | 1 |
| trf_2_1 | Bra015 | 24  |    |   |    |      |      | AUCAGAGUGGCGCAGC | CGUUUCCACUGCACCA  | Transl |   |
| 25      | 824    | 3   | .0 | 1 | 23 | 916  | 938  | GGAAGCG          | CUCUGAC           | ation  | 1 |

|         |        |     |    |   |    |      |      |                  |                  |        |   |
|---------|--------|-----|----|---|----|------|------|------------------|------------------|--------|---|
| trf_2_1 | Bra033 | 18  |    |   |    |      |      | AUCAGAGUGGCGCAGC | UUACGUUGCACCACUU | Transl |   |
| 25      | 352    | 3   | .3 | 1 | 20 | 590  | 609  | GGAA             | UGAU             | ation  | 1 |
| trf_2_1 | Bra033 | 21  |    |   |    |      |      | GGGGAUGUAGCUCAAA | CUGGACCCUUUGGGUA | Transl |   |
| 26      | 370    | 3   | .6 | 1 | 24 | 4746 | 4769 | UGGUAGAG         | ACAUCCCC         | ation  | 1 |
| trf_2_1 | Bra033 | 21  |    |   |    |      |      | GGGGAUGUAGCUCAAA | ACCCUUUGGGUAACAU | Transl |   |
| 27      | 370    | 3   | .6 | 1 | 20 | 4750 | 4769 | UGGU             | CCCC             | ation  | 1 |
| trf_2_1 | Bra015 | 24  |    |   |    |      |      | AUCAGAGUGGCGCAGC | CGUUUCCACUGCACCA | Transl |   |
| 32      | 824    | 3   | .0 | 1 | 23 | 916  | 938  | GGAAGCG          | CUCUGAC          | ation  | 1 |
| trf_2_1 | Bra033 | 18  |    |   |    |      |      | AUCAGAGUGGCGCAGC | UUACGUUGCACCACUU | Transl |   |
| 32      | 352    | 3   | .3 | 1 | 20 | 590  | 609  | GGAA             | UGAU             | ation  | 1 |
| trf_2_1 | Bra036 | 13  |    |   |    |      |      | GUGGCUGUAGUUUAG  | CAACACUAAAGUGCAG | Transl |   |
| 42      | 328    | 3   | .8 | 1 | 20 | 708  | 727  | UGGUG            | CUAC             | ation  | 1 |
| trf_2_1 | Bra027 | 22  |    |   |    |      |      | GCCGACUUAGCUCAGU | UACCACAGGGCGAAGU | Transl |   |
| 51      | 297    | 3   | .9 | 1 | 20 | 178  | 197  | GGUA             | UGGC             | ation  | 1 |
| trf_2_1 | Bra037 | 14  |    |   |    |      |      | UCCGUUGUAGUCUAGC | UGACUGGUUAGGCCAC | Transl |   |
| 52      | 499    | 3   | .7 | 1 | 22 | 174  | 195  | UGGUCA           | AACGGA           | ation  | 1 |
| trf_2_1 | Bra037 | 14  |    |   |    |      |      | UCCGUUGUAGUCUAGC | UGACUGGUUAGGCCAC | Transl |   |
| 73      | 499    | 3   | .7 | 1 | 22 | 174  | 195  | UGGUCA           | AACGGA           | ation  | 1 |
| trf_2_1 | Bra037 | 22  |    |   |    |      |      | UCCGUUAUCGUCCAGC | GUUGAAACCGCUGUCU | Transl |   |
| 86      | 748    | 2.5 | .8 | 1 | 25 | 561  | 585  | GGUUAGGAU        | GAUAACGGA        | ation  | 1 |
| trf_2_1 | Bra037 | 22  |    |   |    |      |      | UCCGUUAUCGUCCAGC | GUUGAAACCGCUGUCU | Transl |   |
| 87      | 748    | 2.5 | .8 | 1 | 25 | 561  | 585  | GGUUAGGAU        | GAUAACGGA        | ation  | 1 |
| trf_2_1 | Bra037 | 22  |    |   |    |      |      | UCCGUUAUCGUCCAGC | AACCGCUGUCUGAUAA | Transl |   |
| 88      | 748    | 2.5 | .8 | 1 | 20 | 566  | 585  | GGUU             | CGGA             | ation  | 1 |
| trf_2_1 | Bra037 | 22  |    |   |    |      |      | UCCGUUAUCGUCCAGC | AACCGCUGUCUGAUAA | Transl |   |
| 90      | 748    | 2.5 | .8 | 1 | 20 | 566  | 585  | GGUU             | CGGA             | ation  | 1 |
| trf_2_1 | Bra037 | 22  |    |   |    |      |      | UCCGUUAUCGUCCAGC | AACCGCUGUCUGAUAA | Transl |   |
| 92      | 748    | 2.5 | .8 | 1 | 20 | 566  | 585  | GGUU             | CGGA             | ation  | 1 |
| trf_2_1 | Bra037 | 22  |    |   |    |      |      | UCCGUUAUCGUCCAGC | AACCGCUGUCUGAUAA | Transl |   |
| 93      | 748    | 2.5 | .8 | 1 | 20 | 566  | 585  | GGUU             | CGGA             | ation  | 1 |
| trf_2_1 | Bra037 | 22  |    |   |    |      |      | UCCGUUAUCGUCCAGC | GUUGAAACCGCUGUCU | Transl |   |
| 94      | 748    | 2.5 | .8 | 1 | 25 | 561  | 585  | GGUUAGGAU        | GAUAACGGA        | ation  | 1 |
| trf_2_2 | Bra015 | 24  |    |   |    |      |      | AUCAGAGUGGCGCAGC | CGUUUCCACUGCACCA | Transl |   |
| 12      | 824    | 3   | .0 | 1 | 23 | 916  | 938  | GGAAGCG          | CUCUGAC          | ation  | 1 |



|         |        |     |    |   |    |      |      |                  |                   |        |   |
|---------|--------|-----|----|---|----|------|------|------------------|-------------------|--------|---|
| trf_2_2 | Bra033 | 18  |    |   |    |      |      | AUCAGAGUGGCGCAGC | UUACGUUGCACCACUU  | Transl |   |
| 12      | 352    | 3   | .3 | 1 | 20 | 590  | 609  | GGAA             | UGAU              | ation  | 1 |
| trf_2_2 | Bra015 | 24  |    |   |    |      |      | AUCAGAGUGGCGCAGC | CGUUUCCACUGCACCA  | Transl |   |
| 22      | 824    | 3   | .0 | 1 | 23 | 916  | 938  | GGAAGCG          | CUCUGAC           | ation  | 1 |
| trf_2_2 | Bra033 | 18  |    |   |    |      |      | AUCAGAGUGGCGCAGC | UUACGUUGCACCACUU  | Transl |   |
| 22      | 352    | 3   | .3 | 1 | 20 | 590  | 609  | GGAA             | UGAU              | ation  | 1 |
| trf_2_2 | Bra020 | 15  |    |   |    |      |      | UCCGUUGUCGUCCAGC | CCAACUGCUGGAAGAC  | Transl |   |
| 24      | 153    | 2.5 | .4 | 1 | 22 | 1953 | 1974 | GGUUAG           | AAUGGG            | ation  | 1 |
| trf_2_2 | Bra012 | 18  |    |   |    |      |      | UCCGUUGUCGUCCAGC | AAUCGCUGAACCACAAC | Transl |   |
| 24      | 143    | 2.5 | .5 | 1 | 20 | 392  | 411  | GGUU             | GGA               | ation  | 1 |
| trf_2_2 | Bra037 | 22  |    |   |    |      |      | UCCGUUGUCGUCCAGC | AACCGCUGUCUGAUAA  | Transl |   |
| 24      | 748    | 3   | .8 | 1 | 20 | 566  | 585  | GGUU             | CGGA              | ation  | 1 |
| trf_2_2 | Bra020 | 15  |    |   |    |      |      | UCCGUUGUCGUCCAGC | CCAACUGCUGGAAGAC  | Transl |   |
| 25      | 153    | 2.5 | .4 | 1 | 22 | 1953 | 1974 | GGUUAG           | AAUGGG            | ation  | 1 |
| trf_2_2 | Bra012 | 18  |    |   |    |      |      | UCCGUUGUCGUCCAGC | AAUCGCUGAACCACAAC | Transl |   |
| 25      | 143    | 2.5 | .5 | 1 | 20 | 392  | 411  | GGUU             | GGA               | ation  | 1 |
| trf_2_2 | Bra037 | 22  |    |   |    |      |      | UCCGUUGUCGUCCAGC | GUUGAAACCGCUGUCU  | Transl |   |
| 25      | 748    | 3   | .8 | 1 | 25 | 561  | 585  | GGUUAGGAU        | GAUAACGGA         | ation  | 1 |
| trf_2_2 | Bra020 | 15  |    |   |    |      |      | UCCGUUGUCGUCCAGC | CCAACUGCUGGAAGAC  | Transl |   |
| 26      | 153    | 2.5 | .4 | 1 | 22 | 1953 | 1974 | GGUUAG           | AAUGGG            | ation  | 1 |
| trf_2_2 | Bra012 | 18  |    |   |    |      |      | UCCGUUGUCGUCCAGC | AAUCGCUGAACCACAAC | Transl |   |
| 26      | 143    | 2.5 | .5 | 1 | 20 | 392  | 411  | GGUU             | GGA               | ation  | 1 |
| trf_2_2 | Bra037 | 22  |    |   |    |      |      | UCCGUUGUCGUCCAGC | GUUGAAACCGCUGUCU  | Transl |   |
| 26      | 748    | 3   | .8 | 1 | 25 | 561  | 585  | GGUUAGGAU        | GAUAACGGA         | ation  | 1 |
| trf_2_2 | Bra020 | 15  |    |   |    |      |      | UCCGUUGUCGUCCAGC | CCAACUGCUGGAAGAC  | Transl |   |
| 27      | 153    | 2.5 | .4 | 1 | 22 | 1953 | 1974 | GGUUAG           | AAUGGG            | ation  | 1 |
| trf_2_2 | Bra012 | 18  |    |   |    |      |      | UCCGUUGUCGUCCAGC | AAUCGCUGAACCACAAC | Transl |   |
| 27      | 143    | 2.5 | .5 | 1 | 20 | 392  | 411  | GGUU             | GGA               | ation  | 1 |
| trf_2_2 | Bra037 | 22  |    |   |    |      |      | UCCGUUGUCGUCCAGC | AACCGCUGUCUGAUAA  | Transl |   |
| 27      | 748    | 3   | .8 | 1 | 20 | 566  | 585  | GGUU             | CGGA              | ation  | 1 |
| trf_2_2 | Bra020 | 15  |    |   |    |      |      | UCCGUUGUCGUCCAGC | AACUGCUGGAAGACAA  | Transl |   |
| 28      | 153    | 2.5 | .4 | 1 | 20 | 1955 | 1974 | GGUU             | UGGG              | ation  | 1 |
| trf_2_2 | Bra012 | 18  |    |   |    |      |      | UCCGUUGUCGUCCAGC | AAUCGCUGAACCACAAC | Transl |   |
| 28      | 143    | 2.5 | .5 | 1 | 20 | 392  | 411  | GGUU             | GGA               | ation  | 1 |

|         |        |     |    |   |    |      |      |                  |                   |        |   |
|---------|--------|-----|----|---|----|------|------|------------------|-------------------|--------|---|
| trf_2_2 | Bra037 | 22  |    |   |    |      |      | UCCGUUGUCGUCCAGC | AACCGCUGUCUGAUAA  | Transl |   |
| 28      | 748    | 3   | .8 | 1 | 20 | 566  | 585  | GGUU             | CGGA              | ation  | 1 |
| trf_2_2 | Bra020 | 15  |    |   |    |      |      | UCCGUUGUCGUCCAGC | CCAACUGCUGGAAGAC  | Transl |   |
| 29      | 153    | 2.5 | .4 | 1 | 22 | 1953 | 1974 | GGUUAG           | AAUGGG            | ation  | 1 |
| trf_2_2 | Bra012 | 18  |    |   |    |      |      | UCCGUUGUCGUCCAGC | AAUCGCUGAACCACAAC | Transl |   |
| 29      | 143    | 2.5 | .5 | 1 | 20 | 392  | 411  | GGUU             | GGA               | ation  | 1 |
| trf_2_2 | Bra037 | 22  |    |   |    |      |      | UCCGUUGUCGUCCAGC | GUUGAAACCGCUGUCU  | Transl |   |
| 29      | 748    | 3   | .8 | 1 | 25 | 561  | 585  | GGUUAGGAU        | GAUAACGGA         | ation  | 1 |
| trf_2_2 | Bra020 | 15  |    |   |    |      |      | UCCGUUGUCGUCCAGC | CCAACUGCUGGAAGAC  | Transl |   |
| 30      | 153    | 2.5 | .4 | 1 | 22 | 1953 | 1974 | GGUUAG           | AAUGGG            | ation  | 1 |
| trf_2_2 | Bra012 | 18  |    |   |    |      |      | UCCGUUGUCGUCCAGC | AAUCGCUGAACCACAAC | Transl |   |
| 30      | 143    | 2.5 | .5 | 1 | 20 | 392  | 411  | GGUU             | GGA               | ation  | 1 |
| trf_2_2 | Bra037 | 22  |    |   |    |      |      | UCCGUUGUCGUCCAGC | AACCGCUGUCUGAUAA  | Transl |   |
| 30      | 748    | 3   | .8 | 1 | 20 | 566  | 585  | GGUU             | CGGA              | ation  | 1 |
| trf_2_2 | Bra037 | 14  |    |   |    |      |      | UCCGUUGUAGUCUAGC | UGACUGGUUAGGCCAC  | Transl |   |
| 36      | 499    | 3   | .7 | 1 | 22 | 174  | 195  | UGGUCA           | AACGGA            | ation  | 1 |
| trf_2_2 | Bra015 | 24  |    |   |    |      |      | AUCAGAGUGGCGCAGC | CGUUUCCACUGCACCA  | Transl |   |
| 43      | 824    | 3   | .0 | 1 | 23 | 916  | 938  | GGAAGCG          | CUCUGAC           | ation  | 1 |
| trf_2_2 | Bra033 | 18  |    |   |    |      |      | AUCAGAGUGGCGCAGC | UUACGUUGCACCACUU  | Transl |   |
| 43      | 352    | 3   | .3 | 1 | 20 | 590  | 609  | GGAA             | UGAU              | ation  | 1 |
| trf_2_2 | Bra013 | 11  |    |   |    |      |      | GUCUGGGUGGUGUAG  | AACCGACUCCACAAUUC | Transl |   |
| 45      | 558    | 3   | .8 | 1 | 21 | 165  | 185  | UCGGUU           | AGAC              | ation  | 1 |
| trf_2_2 | Bra020 | 15  |    |   |    |      |      | UCCGUUGUCGUCCAGC | CCAACUGCUGGAAGAC  | Transl |   |
| 48      | 153    | 2.5 | .4 | 1 | 22 | 1953 | 1974 | GGUUAG           | AAUGGG            | ation  | 1 |
| trf_2_2 | Bra012 | 18  |    |   |    |      |      | UCCGUUGUCGUCCAGC | AAUCGCUGAACCACAAC | Transl |   |
| 48      | 143    | 2.5 | .5 | 1 | 20 | 392  | 411  | GGUU             | GGA               | ation  | 1 |
| trf_2_2 | Bra037 | 22  |    |   |    |      |      | UCCGUUGUCGUCCAGC | GUUGAAACCGCUGUCU  | Transl |   |
| 48      | 748    | 3   | .8 | 1 | 25 | 561  | 585  | GGUUAGGAU        | GAUAACGGA         | ation  | 1 |
| trf_2_2 | Bra020 | 15  |    |   |    |      |      | UCCGUUGUCGUCCAGC | CCAACUGCUGGAAGAC  | Transl |   |
| 50      | 153    | 2.5 | .4 | 1 | 22 | 1953 | 1974 | GGUUAG           | AAUGGG            | ation  | 1 |
| trf_2_2 | Bra012 | 18  |    |   |    |      |      | UCCGUUGUCGUCCAGC | AAUCGCUGAACCACAAC | Transl |   |
| 50      | 143    | 2.5 | .5 | 1 | 20 | 392  | 411  | GGUU             | GGA               | ation  | 1 |
| trf_2_2 | Bra037 | 22  |    |   |    |      |      | UCCGUUGUCGUCCAGC | AACCGCUGUCUGAUAA  | Transl |   |
| 50      | 748    | 3   | .8 | 1 | 20 | 566  | 585  | GGUU             | CGGA              | ation  | 1 |

|         |        |     |    |   |    |      |      |                  |                   |        |   |
|---------|--------|-----|----|---|----|------|------|------------------|-------------------|--------|---|
| trf_2_2 | Bra020 | 15  |    |   |    |      |      | UCCGUUGUCGUCCAGC | CCAACUGCUGGAAGAC  | Transl |   |
| 51      | 153    | 2.5 | .4 | 1 | 22 | 1953 | 1974 | GGUUAG           | AAUGGG            | ation  | 1 |
| trf_2_2 | Bra012 | 18  |    |   |    |      |      | UCCGUUGUCGUCCAGC | AAUCGCUGAACCACAAC | Transl |   |
| 51      | 143    | 2.5 | .5 | 1 | 20 | 392  | 411  | GGUU             | GGA               | ation  | 1 |
| trf_2_2 | Bra037 | 22  |    |   |    |      |      | UCCGUUGUCGUCCAGC | GUUGAAACCGCUGUCU  | Transl |   |
| 51      | 748    | 3   | .8 | 1 | 25 | 561  | 585  | GGUUAGGAU        | GAUAACGGA         | ation  | 1 |
| trf_2_2 | Bra020 | 15  |    |   |    |      |      | UCCGUUGUCGUCCAGC | CCAACUGCUGGAAGAC  | Transl |   |
| 53      | 153    | 2.5 | .4 | 1 | 22 | 1953 | 1974 | GGUUAG           | AAUGGG            | ation  | 1 |
| trf_2_2 | Bra012 | 18  |    |   |    |      |      | UCCGUUGUCGUCCAGC | AAUCGCUGAACCACAAC | Transl |   |
| 53      | 143    | 2.5 | .5 | 1 | 20 | 392  | 411  | GGUU             | GGA               | ation  | 1 |
| trf_2_2 | Bra037 | 22  |    |   |    |      |      | UCCGUUGUCGUCCAGC | AACCGCUGUCUGAUAA  | Transl |   |
| 53      | 748    | 3   | .8 | 1 | 20 | 566  | 585  | GGUU             | CGGA              | ation  | 1 |
| trf_2_2 | Bra020 | 15  |    |   |    |      |      | UCCGUUGUCGUCCAGC | AACUGCUGGAAGACAA  | Transl |   |
| 54      | 153    | 2.5 | .4 | 1 | 20 | 1955 | 1974 | GGUU             | UGGG              | ation  | 1 |
| trf_2_2 | Bra012 | 18  |    |   |    |      |      | UCCGUUGUCGUCCAGC | AAUCGCUGAACCACAAC | Transl |   |
| 54      | 143    | 2.5 | .5 | 1 | 20 | 392  | 411  | GGUU             | GGA               | ation  | 1 |
| trf_2_2 | Bra037 | 22  |    |   |    |      |      | UCCGUUGUCGUCCAGC | AACCGCUGUCUGAUAA  | Transl |   |
| 54      | 748    | 3   | .8 | 1 | 20 | 566  | 585  | GGUU             | CGGA              | ation  | 1 |
| trf_2_2 | Bra020 | 15  |    |   |    |      |      | UCCGUUGUCGUCCAGC | CCAACUGCUGGAAGAC  | Transl |   |
| 56      | 153    | 2.5 | .4 | 1 | 22 | 1953 | 1974 | GGUUAG           | AAUGGG            | ation  | 1 |
| trf_2_2 | Bra012 | 18  |    |   |    |      |      | UCCGUUGUCGUCCAGC | AAUCGCUGAACCACAAC | Transl |   |
| 56      | 143    | 2.5 | .5 | 1 | 20 | 392  | 411  | GGUU             | GGA               | ation  | 1 |
| trf_2_2 | Bra037 | 22  |    |   |    |      |      | UCCGUUGUCGUCCAGC | AACCGCUGUCUGAUAA  | Transl |   |
| 56      | 748    | 3   | .8 | 1 | 20 | 566  | 585  | GGUU             | CGGA              | ation  | 1 |
| trf_2_2 | Bra020 | 15  |    |   |    |      |      | UCCGUUGUCGUCCAGC | CCAACUGCUGGAAGAC  | Transl |   |
| 57      | 153    | 2.5 | .4 | 1 | 22 | 1953 | 1974 | GGUUAG           | AAUGGG            | ation  | 1 |
| trf_2_2 | Bra012 | 18  |    |   |    |      |      | UCCGUUGUCGUCCAGC | AAUCGCUGAACCACAAC | Transl |   |
| 57      | 143    | 2.5 | .5 | 1 | 20 | 392  | 411  | GGUU             | GGA               | ation  | 1 |
| trf_2_2 | Bra037 | 22  |    |   |    |      |      | UCCGUUGUCGUCCAGC | GUUGAAACCGCUGUCU  | Transl |   |
| 57      | 748    | 3   | .8 | 1 | 25 | 561  | 585  | GGUUAGGAU        | GAUAACGGA         | ation  | 1 |
| trf_2_2 | Bra036 | 13  |    |   |    |      |      | GUGGCUGUAGUUUAG  | CAACACUAAAGUGCAG  | Transl |   |
| 68      | 328    | 3   | .8 | 1 | 20 | 708  | 727  | UGGUG            | CUAC              | ation  | 1 |
| trf_2_2 | Bra015 | 24  |    |   |    |      |      | AUCAGAGUGGCGCAGC | CGUUUCCACUGCACCA  | Transl |   |
| 74      | 824    | 3   | .0 | 1 | 23 | 916  | 938  | GGAAGCG          | CUCUGAC           | ation  | 1 |

|         |        |    |    |   |    |      |      |                  |                   |        |   |
|---------|--------|----|----|---|----|------|------|------------------|-------------------|--------|---|
| trf_2_2 | Bra033 | 18 |    |   |    |      |      | AUCAGAGUGGCGCAGC | UUACGUUGCACCACUU  | Transl |   |
| 74      | 352    | 3  | .3 | 1 | 20 | 590  | 609  | GGAA             | UGAU              | ation  | 1 |
| trf_2_2 | Bra015 | 24 |    |   |    |      |      | AUCAGAGUGGCGCAGC | CGUUUCCACUGCACCA  | Transl |   |
| 76      | 824    | 3  | .0 | 1 | 23 | 916  | 938  | GGAAGCG          | CUCUGAC           | ation  | 1 |
| trf_2_2 | Bra033 | 18 |    |   |    |      |      | AUCAGAGUGGCGCAGC | UUACGUUGCACCACUU  | Transl |   |
| 76      | 352    | 3  | .3 | 1 | 20 | 590  | 609  | GGAA             | UGAU              | ation  | 1 |
| trf_2_2 | Bra015 | 24 |    |   |    |      |      | AUCAGAGUGGCGCAGC | CGUUUCCACUGCACCA  | Transl |   |
| 82      | 824    | 3  | .0 | 1 | 23 | 916  | 938  | GGAAGCG          | CUCUGAC           | ation  | 1 |
| trf_2_2 | Bra033 | 18 |    |   |    |      |      | AUCAGAGUGGCGCAGC | UUACGUUGCACCACUU  | Transl |   |
| 82      | 352    | 3  | .3 | 1 | 20 | 590  | 609  | GGAA             | UGAU              | ation  | 1 |
| trf_2_2 | Bra038 | 17 |    |   |    |      |      | GGGUCCAUAGCUCAGU | UGUUUUUAUCACUCAGA | Transl |   |
| 86      | 641    | 3  | .8 | 1 | 25 | 1139 | 1163 | GGUAGAGCA        | UAUGGACUC         | ation  | 1 |
| trf_2_2 | Bra003 | 22 |    |   |    |      |      | GGGUCCAUAGCUCAGU | CUUCCACUGAUCUGUG  | Transl |   |
| 86      | 794    | 3  | .2 | 1 | 21 | 404  | 424  | GGUAG            | GAUCC             | ation  | 1 |
| trf_2_2 | Bra033 | 21 |    |   |    |      |      | GGGGAUGUAGCUCAAA | CUGGACCCUUUGGGUA  | Transl |   |
| 88      | 370    | 3  | .6 | 1 | 24 | 4746 | 4769 | UGGUAGAG         | ACAUCCCC          | ation  | 1 |
| trf_2_2 | Bra033 | 21 |    |   |    |      |      | GGGGAUGUAGCUCAAA | ACCCUUUGGGUAACAU  | Transl |   |
| 89      | 370    | 3  | .6 | 1 | 20 | 4750 | 4769 | UGGU             | CCCC              | ation  | 1 |
| trf_2_2 | Bra015 | 24 |    |   |    |      |      | AUCAGAGUGGCGCAGC | CGUUUCCACUGCACCA  | Transl |   |
| 99      | 824    | 3  | .0 | 1 | 23 | 916  | 938  | GGAAGCG          | CUCUGAC           | ation  | 1 |
| trf_2_2 | Bra033 | 18 |    |   |    |      |      | AUCAGAGUGGCGCAGC | UUACGUUGCACCACUU  | Transl |   |
| 99      | 352    | 3  | .3 | 1 | 20 | 590  | 609  | GGAA             | UGAU              | ation  | 1 |
| trf_2_3 | Bra027 | 22 |    |   |    |      |      | GCCGACUUAGCUCAGU | UACCACAGGGCGAAGU  | Transl |   |
| 00      | 297    | 3  | .9 | 1 | 20 | 178  | 197  | GGUA             | UGGC              | ation  | 1 |
| trf_2_3 | Bra015 | 24 |    |   |    |      |      | AUCAGAGUGGCGCAGC | CGUUUCCACUGCACCA  | Transl |   |
| 04      | 824    | 3  | .0 | 1 | 23 | 916  | 938  | GGAAGCG          | CUCUGAC           | ation  | 1 |
| trf_2_3 | Bra033 | 18 |    |   |    |      |      | AUCAGAGUGGCGCAGC | UUACGUUGCACCACUU  | Transl |   |
| 04      | 352    | 3  | .3 | 1 | 20 | 590  | 609  | GGAA             | UGAU              | ation  | 1 |
| trf_2_3 | Bra015 | 24 |    |   |    |      |      | AUCAGAGUGGCGCAGC | CGUUUCCACUGCACCA  | Transl |   |
| 05      | 824    | 3  | .0 | 1 | 23 | 916  | 938  | GGAAGCG          | CUCUGAC           | ation  | 1 |
| trf_2_3 | Bra033 | 18 |    |   |    |      |      | AUCAGAGUGGCGCAGC | UUACGUUGCACCACUU  | Transl |   |
| 05      | 352    | 3  | .3 | 1 | 20 | 590  | 609  | GGAA             | UGAU              | ation  | 1 |
| trf_2_3 | Bra033 | 21 |    |   |    |      |      | GGGGAUGUAGCUCAAA | ACCCUUUGGGUAACAU  | Transl |   |
| 08      | 370    | 3  | .6 | 1 | 20 | 4750 | 4769 | UGGU             | CCCC              | ation  | 1 |

|         |        |     |    |   |    |      |      |                  |                   |        |   |
|---------|--------|-----|----|---|----|------|------|------------------|-------------------|--------|---|
| trf_2_3 | Bra033 | 10  |    |   |    |      |      | GGGAUUGUAGUUCAA  | ACCGAUUGAUCAGCAA  | Transl |   |
| 26      | 536    | 3   | .5 | 1 | 20 | 426  | 445  | UCGGU            | UUCC              | ation  | 1 |
| trf_2_3 | Bra033 | 10  |    |   |    |      |      | GGGAUUGUAGUUCAA  | ACCGAUUGAUCAGCAA  | Transl |   |
| 29      | 536    | 3   | .5 | 1 | 20 | 426  | 445  | UCGGU            | UUCC              | ation  | 1 |
| trf_2_3 | Bra034 | 11  |    |   |    |      |      | GGGAUUGUAGUUCAA  | UCCAAAUGAGCAGCAA  | Transl |   |
| 30      | 753    | 3   | .6 | 1 | 20 | 443  | 462  | UUGGA            | UCCC              | ation  | 1 |
| trf_2_3 | Bra003 | 13  |    |   |    |      |      | GGGAUUGUAGUUCAA  | UCCAGUUAUUCUACAA  | Transl |   |
| 30      | 597    | 3   | .1 | 1 | 20 | 1508 | 1527 | UUGGA            | UUCC              | ation  | 1 |
| trf_2_3 | Bra023 | 12  |    |   |    |      |      | GGGAUUGUAGUUCAA  | UCCAAGUGAACAUCAA  | Transl |   |
| 30      | 172    | 3   | .4 | 1 | 20 | 614  | 633  | UUGGA            | UCCC              | ation  | 1 |
| trf_2_3 | Bra034 | 11  |    |   |    |      |      | GGGAUUGUAGUUCAA  | AUCCAAAUGAGCAGCA  | Transl |   |
| 38      | 753    | 3   | .6 | 1 | 21 | 442  | 462  | UUGGAU           | AUCCC             | ation  | 1 |
| trf_2_3 | Bra003 | 13  |    |   |    |      |      | GGGAUUGUAGUUCAA  | AUCCAGUUAUUCUACA  | Transl |   |
| 38      | 597    | 3   | .1 | 1 | 21 | 1507 | 1527 | UUGGAU           | AUCCC             | ation  | 1 |
| trf_2_3 | Bra023 | 12  |    |   |    |      |      | GGGAUUGUAGUUCAA  | UCCAAGUGAACAUCAA  | Transl |   |
| 38      | 172    | 3   | .4 | 1 | 20 | 614  | 633  | UUGGA            | UCCC              | ation  | 1 |
| trf_2_3 | Bra033 | 10  |    |   |    |      |      | GGGAUUGUAGUUCAA  | ACCGAUUGAUCAGCAA  | Transl |   |
| 39      | 536    | 3   | .5 | 1 | 20 | 426  | 445  | UCGGU            | UUCC              | ation  | 1 |
| trf_2_3 | Bra033 | 10  |    |   |    |      |      | GGGAUUGUAGUUCAA  | ACCGAUUGAUCAGCAA  | Transl |   |
| 41      | 536    | 3   | .5 | 1 | 20 | 426  | 445  | UCGGU            | UUCC              | ation  | 1 |
| trf_2_3 | Bra033 | 10  |    |   |    |      |      | GGGAUUGUAGUUCAA  | ACCGAUUGAUCAGCAA  | Transl |   |
| 42      | 536    | 3   | .5 | 1 | 20 | 426  | 445  | UCGGU            | UUCC              | ation  | 1 |
| trf_2_3 | Bra034 | 9.  |    |   |    |      |      | GGGAUUGUAGUUCAA  | CCUAAUUAACCACAA   | Transl |   |
| 45      | 571    | 3   | 0  | 1 | 20 | 52   | 71   | UUGGG            | UCUC              | ation  | 1 |
| trf_2_3 | Bra034 | 9.  |    |   |    |      |      | GGGAUUGUAGUUCAA  | CCUAAUUAACCACAA   | Transl |   |
| 46      | 571    | 3   | 0  | 1 | 20 | 52   | 71   | UUGGG            | UCUC              | ation  | 1 |
| trf_2_3 | Bra023 | 16  |    |   |    |      |      | GCUUCAGUAGCUCGGA | ACCAACCGAGCAACUGA | Transl |   |
| 52      | 806    | 3   | .3 | 1 | 20 | 781  | 800  | UGGC             | AGC               | ation  | 1 |
| trf_2_3 | Bra023 | 9.  |    |   |    |      |      | GGUUCUAUGGUGUAG  | AACCAAUACAUGAUAG  | Transl |   |
| 54      | 904    | 3   | 9  | 1 | 20 | 1163 | 1182 | UGGUU            | AAUC              | ation  | 1 |
| trf_2_3 | Bra020 | 15  |    |   |    |      |      | UCCGUUGUCGUCCAGC | CCAACUGCUGGAAGAC  | Transl |   |
| 70      | 153    | 2.5 | .4 | 1 | 22 | 1953 | 1974 | GGUUAG           | AAUGGG            | ation  | 1 |
| trf_2_3 | Bra012 | 18  |    |   |    |      |      | UCCGUUGUCGUCCAGC | AAUCGCUGAACCACAAC | Transl |   |
| 70      | 143    | 2.5 | .5 | 1 | 20 | 392  | 411  | GGUU             | GGA               | ation  | 1 |

|         |        |     |    |   |    |      |      |                  |                   |        |   |
|---------|--------|-----|----|---|----|------|------|------------------|-------------------|--------|---|
| trf_2_3 | Bra037 | 22  |    |   |    |      |      | UCCGUUGUCGUCCAGC | AACCGCUGUCUGAUAA  | Transl |   |
| 70      | 748    | 3   | .8 | 1 | 20 | 566  | 585  | GGUU             | CGGA              | ation  | 1 |
| trf_2_3 | Bra020 | 15  |    |   |    |      |      | UCCGUUGUCGUCCAGC | CCAACUGCUGGAAGAC  | Transl |   |
| 71      | 153    | 2.5 | .4 | 1 | 22 | 1953 | 1974 | GGUUAG           | AAUGGG            | ation  | 1 |
| trf_2_3 | Bra012 | 18  |    |   |    |      |      | UCCGUUGUCGUCCAGC | AAUCGCUGAACCACAAC | Transl |   |
| 71      | 143    | 2.5 | .5 | 1 | 20 | 392  | 411  | GGUU             | GGA               | ation  | 1 |
| trf_2_3 | Bra037 | 22  |    |   |    |      |      | UCCGUUGUCGUCCAGC | GUUGAAACCGCUGUCU  | Transl |   |
| 71      | 748    | 3   | .8 | 1 | 25 | 561  | 585  | GGUUAGGAU        | GAUAACGGA         | ation  | 1 |
| trf_2_3 | Bra020 | 15  |    |   |    |      |      | UCCGUUGUCGUCCAGC | CCAACUGCUGGAAGAC  | Transl |   |
| 73      | 153    | 2.5 | .4 | 1 | 22 | 1953 | 1974 | GGUUAG           | AAUGGG            | ation  | 1 |
| trf_2_3 | Bra012 | 18  |    |   |    |      |      | UCCGUUGUCGUCCAGC | AAUCGCUGAACCACAAC | Transl |   |
| 73      | 143    | 2.5 | .5 | 1 | 20 | 392  | 411  | GGUU             | GGA               | ation  | 1 |
| trf_2_3 | Bra037 | 22  |    |   |    |      |      | UCCGUUGUCGUCCAGC | AACCGCUGUCUGAUAA  | Transl |   |
| 73      | 748    | 3   | .8 | 1 | 20 | 566  | 585  | GGUU             | CGGA              | ation  | 1 |
| trf_2_3 | Bra020 | 15  |    |   |    |      |      | UCCGUUGUCGUCCAGC | CCAACUGCUGGAAGAC  | Transl |   |
| 74      | 153    | 2.5 | .4 | 1 | 22 | 1953 | 1974 | GGUUAG           | AAUGGG            | ation  | 1 |
| trf_2_3 | Bra012 | 18  |    |   |    |      |      | UCCGUUGUCGUCCAGC | AAUCGCUGAACCACAAC | Transl |   |
| 74      | 143    | 2.5 | .5 | 1 | 20 | 392  | 411  | GGUU             | GGA               | ation  | 1 |
| trf_2_3 | Bra037 | 22  |    |   |    |      |      | UCCGUUGUCGUCCAGC | GUUGAAACCGCUGUCU  | Transl |   |
| 74      | 748    | 3   | .8 | 1 | 25 | 561  | 585  | GGUUAGGAU        | GAUAACGGA         | ation  | 1 |
| trf_2_3 | Bra020 | 15  |    |   |    |      |      | UCCGUUGUCGUCCAGC | AACUGCUGGAAGACAA  | Transl |   |
| 77      | 153    | 2.5 | .4 | 1 | 20 | 1955 | 1974 | GGUU             | UGGG              | ation  | 1 |
| trf_2_3 | Bra012 | 18  |    |   |    |      |      | UCCGUUGUCGUCCAGC | AAUCGCUGAACCACAAC | Transl |   |
| 77      | 143    | 2.5 | .5 | 1 | 20 | 392  | 411  | GGUU             | GGA               | ation  | 1 |
| trf_2_3 | Bra037 | 22  |    |   |    |      |      | UCCGUUGUCGUCCAGC | AACCGCUGUCUGAUAA  | Transl |   |
| 77      | 748    | 3   | .8 | 1 | 20 | 566  | 585  | GGUU             | CGGA              | ation  | 1 |
| trf_2_3 | Bra020 | 15  |    |   |    |      |      | UCCGUUGUCGUCCAGC | CCAACUGCUGGAAGAC  | Transl |   |
| 78      | 153    | 2.5 | .4 | 1 | 22 | 1953 | 1974 | GGUUAG           | AAUGGG            | ation  | 1 |
| trf_2_3 | Bra012 | 18  |    |   |    |      |      | UCCGUUGUCGUCCAGC | AAUCGCUGAACCACAAC | Transl |   |
| 78      | 143    | 2.5 | .5 | 1 | 20 | 392  | 411  | GGUU             | GGA               | ation  | 1 |
| trf_2_3 | Bra037 | 22  |    |   |    |      |      | UCCGUUGUCGUCCAGC | AACCGCUGUCUGAUAA  | Transl |   |
| 78      | 748    | 3   | .8 | 1 | 20 | 566  | 585  | GGUU             | CGGA              | ation  | 1 |
| trf_2_3 | Bra020 | 15  |    |   |    |      |      | UCCGUUGUCGUCCAGC | CCAACUGCUGGAAGAC  | Transl |   |
| 79      | 153    | 2.5 | .4 | 1 | 22 | 1953 | 1974 | GGUUAG           | AAUGGG            | ation  | 1 |

|         |        |     |    |   |    |      |      |                  |                   |        |   |
|---------|--------|-----|----|---|----|------|------|------------------|-------------------|--------|---|
| trf_2_3 | Bra012 | 18  |    |   |    |      |      | UCCGUUGUCGUCCAGC | AAUCGCUGAACCACAAC | Transl |   |
| 79      | 143    | 2.5 | .5 | 1 | 20 | 392  | 411  | GGUU             | GGA               | ation  | 1 |
| trf_2_3 | Bra037 | 22  |    |   |    |      |      | UCCGUUGUCGUCCAGC | GUUGAAACCGCUGUCU  | Transl |   |
| 79      | 748    | 3   | .8 | 1 | 25 | 561  | 585  | GGUUAGGAU        | GAUAACGGA         | ation  | 1 |
| trf_2_3 | Bra033 | 21  |    |   |    |      |      | GGGGAUGUAGCUCAAA | CUGGACCCUUUGGGUA  | Transl |   |
| 88      | 370    | 3   | .6 | 1 | 24 | 4746 | 4769 | UGGUAGAG         | ACAUCCCC          | ation  | 1 |
| trf_2_3 | Bra033 | 21  |    |   |    |      |      | GGGGAUGUAGCUCAAA | ACCCUUUGGGUAACAU  | Transl |   |
| 89      | 370    | 3   | .6 | 1 | 20 | 4750 | 4769 | UGGU             | CCCC              | ation  | 1 |
| trf_2_4 | Bra037 | 14  |    |   |    |      |      | UCCGUUGUAGUCUAGC | ACUGGUUAGGCCACAA  | Transl |   |
| 06      | 499    | 3   | .7 | 1 | 20 | 176  | 195  | UGGU             | CGGA              | ation  | 1 |
| trf_2_4 | Bra032 | 22  |    |   |    |      |      | GCUGGAGUAGCUCAGU | AUCGGCUGAGCCACUC  | Transl |   |
| 07      | 168    | 2.5 | .3 | 1 | 20 | 150  | 169  | UGGU             | CAGC              | ation  | 1 |
| trf_2_4 | Bra022 | 23  |    |   |    |      |      | GCUGGAGUAGCUCAGU | AUCAAUUGGGAUACUC  | Transl |   |
| 07      | 251    | 3   | .9 | 1 | 20 | 3475 | 3494 | UGGU             | UAGC              | ation  | 1 |
| trf_2_4 | Bra005 | 13  |    |   |    |      |      | GCUGGAGU-        | ACCAACUGAUCUCACU  | Transl |   |
| 07      | 116    | 3   | .5 | 1 | 20 | 234  | 254  | AGCUCAGUUGGU     | CCAGC             | ation  | 1 |
| trf_2_4 | Bra032 | 22  |    |   |    |      |      | GCUGGAGUAGCUCAGU | AUCGGCUGAGCCACUC  | Transl |   |
| 08      | 168    | 2.5 | .3 | 1 | 20 | 150  | 169  | UGGU             | CAGC              | ation  | 1 |
| trf_2_4 | Bra005 | 13  |    |   |    |      |      | GCUGGAGU-        | AACCAACUGAUCUCAC  | Transl |   |
| 08      | 116    | 3   | .5 | 1 | 21 | 233  | 254  | AGCUCAGUUGGUU    | UCCAGC            | ation  | 1 |
| trf_2_4 | Bra022 | 23  |    |   |    |      |      | GCUGGAGUAGCUCAGU | AUCAAUUGGGAUACUC  | Transl |   |
| 08      | 251    | 3   | .9 | 1 | 20 | 3475 | 3494 | UGGU             | UAGC              | ation  | 1 |
| trf_2_4 | Bra036 | 13  |    |   |    |      |      | GUGGCUGUAGUUUAG  | CAACACUAAAAGUGCAG | Transl |   |
| 09      | 328    | 3   | .8 | 1 | 20 | 708  | 727  | UGGUG            | CUAC              | ation  | 1 |
| trf_2_4 | Bra037 | 14  |    |   |    |      |      | UCCGUUGUAGUCUAGC | UGACUGGUUAGGCCAC  | Transl |   |
| 20      | 499    | 3   | .7 | 1 | 22 | 174  | 195  | UGGUCA           | AACGGA            | ation  | 1 |
| trf_2_4 | Bra015 | 24  |    |   |    |      |      | AUCAGAGUGGCGCAGC | CGUUUCCACUGCACCA  | Transl |   |
| 21      | 824    | 3   | .0 | 1 | 23 | 916  | 938  | GGAAGCG          | CUCUGAC           | ation  | 1 |
| trf_2_4 | Bra033 | 18  |    |   |    |      |      | AUCAGAGUGGCGCAGC | UUACGUUGCACCACUU  | Transl |   |
| 21      | 352    | 3   | .3 | 1 | 20 | 590  | 609  | GGAA             | UGAU              | ation  | 1 |
| trf_2_4 | Bra033 | 21  |    |   |    |      |      | GGGGAUGUAGCUCAAA | ACCCUUUGGGUAACAU  | Transl |   |
| 33      | 370    | 3   | .6 | 1 | 20 | 4750 | 4769 | UGGU             | CCCC              | ation  | 1 |
| trf_2_4 | Bra015 | 24  |    |   |    |      |      | AUCAGAGUGGCGCAGC | CGUUUCCACUGCACCA  | Transl |   |
| 34      | 824    | 3   | .0 | 1 | 23 | 916  | 938  | GGAAGCG          | CUCUGAC           | ation  | 1 |

|         |        |    |    |   |    |      |      |                  |                  |        |   |
|---------|--------|----|----|---|----|------|------|------------------|------------------|--------|---|
| trf_2_4 | Bra033 | 18 |    |   |    |      |      | AUCAGAGUGGCGCAGC | UUACGUUGCACCACUU | Transl |   |
| 34      | 352    | 3  | .3 | 1 | 20 | 590  | 609  | GGAA             | UGAU             | ation  | 1 |
| trf_2_4 | Bra037 | 14 |    |   |    |      |      | UCCGUUGUAGUCUAGC | UGACUGGUUAGGCCAC | Transl |   |
| 35      | 499    | 3  | .7 | 1 | 22 | 174  | 195  | UGGUCA           | AACGGA           | ation  | 1 |
| trf_2_4 | Bra009 | 21 |    |   |    |      |      | UUAGGUUCAAUCCUA  | UGCAGUCGAUAGGAUA | Transl |   |
| 45      | 377    | 3  | .2 | 1 | 25 | 578  | 602  | UUGGACGCA        | UGAGCCUGA        | ation  | 1 |
| trf_2_4 | Bra008 | 14 |    |   |    |      |      | UUAGGUUCAAUCCUA  | UCGAUGGGGAUUGAAC | Transl |   |
| 45      | 706    | 3  | .7 | 1 | 20 | 1321 | 1340 | UUGG             | CUAA             | ation  | 1 |
| trf_2_4 | Bra020 | 12 |    |   |    |      |      | AGGUUCAAUCCUAUU  | GUCCGAGAGGCUUUGG | Transl |   |
| 46      | 978    | 3  | .8 | 1 | 20 | 173  | 192  | GGAC             | ACCU             | ation  | 1 |



# tRF pollen

| ncRNA<br>_Acc. | Target<br>_Acc. | Expect<br>ation | U<br>PE | ncRNA<br>_start | ncRNA<br>_end | Target_<br>start | Target<br>_end | ncRNA_aligned_fragme<br>nt | Target_aligned_fragme<br>nt | Inhibit<br>ion | Multip<br>licity |
|----------------|-----------------|-----------------|---------|-----------------|---------------|------------------|----------------|----------------------------|-----------------------------|----------------|------------------|
|                | Bra020          |                 | 12      |                 |               |                  |                | GGGGAUGUAGCUCAAA           | GCCAUUGGAGCUAUAU            | Cleava         |                  |
| trf_3_1        | 755             | 3               | .6      | 1               | 20            | 454              | 473            | UGGU                       | UCUC                        | ge             | 1                |
|                | Bra025          |                 | 17      |                 |               |                  |                | GGGGAUGUAGCUCAAA           | ACAAUUUGAGCUUCAU            | Cleava         |                  |
| trf_3_1        | 904             | 3               | .2      | 1               | 20            | 344              | 363            | UGGU                       | CUUC                        | ge             | 1                |
|                | Bra024          |                 | 7.      |                 |               |                  |                | GGGGAUGUAGCUCAAA           | AACAUUUCGGUUACAU            | Cleava         |                  |
| trf_3_1        | 638             | 3               | 5       | 1               | 20            | 206              | 225            | UGGU                       | CCCC                        | ge             | 1                |
|                | Bra000          |                 | 11      |                 |               |                  |                | UCCGUUAUCGUCCAGC           | UAACCGGAGGACGAUA            | Cleava         |                  |
| trf_3_3        | 529             | 2.5             | .2      | 1               | 21            | 984              | 1004           | GGUUA                      | AUGGA                       | ge             | 1                |
|                | Bra032          |                 | 22      |                 |               |                  |                | UCCGUUAUCGUCCAGC           | GACGGCUUGACGAUGA            | Cleava         |                  |
| trf_3_3        | 111             | 3               | .4      | 1               | 20            | 727              | 746            | GGUU                       | CGGA                        | ge             | 1                |
|                | Bra000          |                 | 11      |                 |               |                  |                | UCCGUUAUCGUCCAGC           | UAACCGGAGGACGAUA            | Cleava         |                  |
| trf_3_4        | 529             | 2.5             | .2      | 1               | 21            | 984              | 1004           | GGUUA                      | AUGGA                       | ge             | 1                |
|                | Bra032          |                 | 22      |                 |               |                  |                | UCCGUUAUCGUCCAGC           | GACGGCUUGACGAUGA            | Cleava         |                  |
| trf_3_4        | 111             | 3               | .4      | 1               | 20            | 727              | 746            | GGUU                       | CGGA                        | ge             | 1                |
|                | Bra000          |                 | 11      |                 |               |                  |                | UCCGUUAUCGUCCAGC           | AACCGGAGGACGAUAA            | Cleava         |                  |
| trf_3_5        | 529             | 2.5             | .2      | 1               | 20            | 985              | 1004           | GGUU                       | UGGA                        | ge             | 1                |
|                | Bra032          |                 | 22      |                 |               |                  |                | UCCGUUAUCGUCCAGC           | GACGGCUUGACGAUGA            | Cleava         |                  |
| trf_3_5        | 111             | 3               | .4      | 1               | 20            | 727              | 746            | GGUU                       | CGGA                        | ge             | 1                |
|                | Bra000          |                 | 11      |                 |               |                  |                | UCCGUUAUCGUCCAGC           | UAACCGGAGGACGAUA            | Cleava         |                  |
| trf_3_6        | 529             | 2.5             | .2      | 1               | 21            | 984              | 1004           | GGUUA                      | AUGGA                       | ge             | 1                |
|                | Bra032          |                 | 22      |                 |               |                  |                | UCCGUUAUCGUCCAGC           | GACGGCUUGACGAUGA            | Cleava         |                  |
| trf_3_6        | 111             | 3               | .4      | 1               | 20            | 727              | 746            | GGUU                       | CGGA                        | ge             | 1                |
|                | Bra000          |                 | 11      |                 |               |                  |                | UCCGUUAUCGUCCAGC           | UAACCGGAGGACGAUA            | Cleava         |                  |
| trf_3_7        | 529             | 2.5             | .2      | 1               | 21            | 984              | 1004           | GGUUA                      | AUGGA                       | ge             | 1                |
|                | Bra032          |                 | 22      |                 |               |                  |                | UCCGUUAUCGUCCAGC           | GACGGCUUGACGAUGA            | Cleava         |                  |
| trf_3_7        | 111             | 3               | .4      | 1               | 20            | 727              | 746            | GGUU                       | CGGA                        | ge             | 1                |
| trf_3_1        | Bra000          |                 | 11      |                 |               |                  |                | UCCGUUAUCGUCCANC           | UAACCGGAGGACGAUA            | Cleava         |                  |
| 0              | 529             | 2.5             | .2      | 1               | 21            | 984              | 1004           | GGUUA                      | AUGGA                       | ge             | 1                |
| trf_3_1        | Bra000          |                 | 11      |                 |               |                  |                | UCCGUUAUCGUCCAGC           | UAACCGGAGGACGAUA            | Cleava         |                  |
| 1              | 529             | 2.5             | .2      | 1               | 21            | 984              | 1004           | GGUUA                      | AUGGA                       | ge             | 1                |

|         |        |     |    |   |    |      |      |                  |                   |        |   |
|---------|--------|-----|----|---|----|------|------|------------------|-------------------|--------|---|
| trf_3_1 | Bra032 | 22  |    |   |    |      |      | UCCGUUAUCGUCCAGC | GACGGCUUGACGAUGA  | Cleava |   |
| 1       | 111    | 3   | .4 | 1 | 20 | 727  | 746  | GGUU             | CGGA              | ge     | 1 |
| trf_3_1 | Bra000 | 11  |    |   |    |      |      | UCCGUUAUCGUCCAGC | UAACCGGAGGACGAUA  | Cleava |   |
| 3       | 529    | 2.5 | .2 | 1 | 21 | 984  | 1004 | GGUUA            | AUGGA             | ge     | 1 |
| trf_3_1 | Bra032 | 22  |    |   |    |      |      | UCCGUUAUCGUCCAGC | GACGGCUUGACGAUGA  | Cleava |   |
| 3       | 111    | 3   | .4 | 1 | 20 | 727  | 746  | GGUU             | CGGA              | ge     | 1 |
| trf_3_1 | Bra013 | 22  |    |   |    |      |      | UCCGUUGUAGUCUAGC | CAUCAUCAGCUUGGCU  | Cleava |   |
| 5       | 528    | 3   | .0 | 1 | 24 | 196  | 219  | UGGUUAGG         | AUAACGGG          | ge     | 1 |
| trf_3_1 | Bra034 | 20  |    |   |    |      |      | GCGGACAUAGCUCAGU | ACCAGCAGAGUUAUGU  | Cleava |   |
| 6       | 638    | 2.5 | .0 | 1 | 20 | 109  | 128  | UGGU             | CCGU              | ge     | 1 |
| trf_3_1 | Bra016 | 20  |    |   |    |      |      | UCCGUCGUAGUCUAGC | CUGAAGAAGCUAGGCU  | Cleava |   |
| 8       | 601    | 3   | .8 | 1 | 24 | 415  | 438  | UGGUUAGG         | GCGACGGA          | ge     | 1 |
| trf_3_1 | Bra016 | 20  |    |   |    |      |      | UCCGUCGUAGUCUAGC | CUGAAGAAGCUAGGCU  | Cleava |   |
| 9       | 601    | 3   | .8 | 1 | 24 | 415  | 438  | UGGUUAGG         | GCGACGGA          | ge     | 1 |
| trf_3_2 | Bra016 | 20  |    |   |    |      |      | UCCGUCGUAGUCUAGC | CUGAAGAAGCUAGGCU  | Cleava |   |
| 0       | 601    | 3   | .8 | 1 | 24 | 415  | 438  | UGGUUAGG         | GCGACGGA          | ge     | 1 |
| trf_3_2 | Bra016 | 20  |    |   |    |      |      | UCCGUCGUAGUCUAGC | AAGAAGCUAGGCUGCG  | Cleava |   |
| 2       | 601    | 3   | .8 | 1 | 21 | 418  | 438  | UGGUU            | ACGGA             | ge     | 1 |
| trf_3_2 | Bra016 | 20  |    |   |    |      |      | UCCGUCGUAGUCUAGC | AAGAAGCUAGGCUGCG  | Cleava |   |
| 3       | 601    | 3   | .8 | 1 | 21 | 418  | 438  | UGGUU            | ACGGA             | ge     | 1 |
| trf_3_2 | Bra009 | 14  |    |   |    |      |      | GGGGAUGUAGCUCAGA | AUCAUCUGGGCUUCGU  | Cleava |   |
| 7       | 876    | 3   | .9 | 1 | 20 | 18   | 37   | UGGU             | CCUC              | ge     | 1 |
| trf_3_2 | Bra016 | 10  |    |   |    |      |      | GGGGAUGUAGCUCAGA | AUCAUCUGAGCUUCGU  | Cleava |   |
| 7       | 141    | 3   | .4 | 1 | 20 | 3033 | 3052 | UGGU             | UCUC              | ge     | 1 |
| trf_3_2 | Bra036 | 20  |    |   |    |      |      | GGGGAUGUAGCUCAGA | ACUGGCUGAGCUACAU  | Cleava |   |
| 7       | 771    | 3   | .2 | 1 | 20 | 5378 | 5397 | UGGU             | UCCU              | ge     | 1 |
| trf_3_2 | Bra018 | 8.  |    |   |    |      |      | GGGGAUGUAGCUCAGA | GCCACCUCAGCUACAUC | Cleava |   |
| 7       | 620    | 3   | 3  | 1 | 20 | 7    | 26   | UGGU             | CUC               | ge     | 1 |
| trf_3_4 | Bra000 | 15  |    |   |    |      |      | GGUUCUAUGGUCUAGC | GACCGCUGGACCAGAG  | Cleava |   |
| 0       | 719    | 3   | .3 | 1 | 20 | 1680 | 1699 | GGUU             | AACU              | ge     | 1 |
| trf_3_4 | Bra014 | 21  |    |   |    |      |      | GGUUCUAUGGUCUAGC | AGCUGCUAGACCUUGG  | Cleava |   |
| 0       | 489    | 3   | .1 | 1 | 20 | 168  | 187  | GGUU             | GACC              | ge     | 1 |
| trf_3_4 | Bra000 | 15  |    |   |    |      |      | GGUUCUAUGGUCUAGC | GACCGCUGGACCAGAG  | Cleava |   |
| 1       | 719    | 3   | .3 | 1 | 20 | 1680 | 1699 | GGUU             | AACU              | ge     | 1 |

|         |        |     |    |   |    |     |      |                  |                   |        |   |
|---------|--------|-----|----|---|----|-----|------|------------------|-------------------|--------|---|
| trf_3_4 | Bra014 | 21  |    |   |    |     |      | GGUUCUAUGGUCUAGC | AGCUGCUAGACCUUGG  | Cleava |   |
| 1       | 489    | 3   | .1 | 1 | 20 | 168 | 187  | GGUU             | GACC              | ge     | 1 |
| trf_3_5 | Bra007 | 14  |    |   |    |     |      | GCACCAGUGGUCUAGU | UUACUACUGGACCUUU  | Cleava |   |
| 4       | 154    | 2.5 | .1 | 1 | 21 | 510 | 530  | GGUAG            | GGUGC             | ge     | 1 |
| trf_3_8 | Bra007 | 14  |    |   |    |     |      | GCACCAGUGGUCUAGU | UUACUACUGGACCUUU  | Cleava |   |
| 1       | 154    | 2.5 | .1 | 1 | 21 | 510 | 530  | GGUAG            | GGUGC             | ge     | 1 |
| trf_3_8 | Bra007 | 14  |    |   |    |     |      | GCACCAGUGGUCUAGU | UUACUACUGGACCUUU  | Cleava |   |
| 2       | 154    | 2.5 | .1 | 1 | 21 | 510 | 530  | GGUAG            | GGUGC             | ge     | 1 |
| trf_3_8 | Bra013 | 16  |    |   |    |     |      | UCCGUUGUCGUCCAGC | AUGAUAAACCGAUGGAU | Cleava |   |
| 3       | 584    | 3   | .4 | 1 | 25 | 886 | 910  | GGUUAGGAU        | GUCAAUGGA         | ge     | 1 |
| trf_3_8 | Bra000 | 11  |    |   |    |     |      | UCCGUUGUCGUCCAGC | UAACCGGAGGACGAUA  | Cleava |   |
| 3       | 529    | 3   | .2 | 1 | 21 | 984 | 1004 | GGUUA            | AUGGA             | ge     | 1 |
| trf_3_8 | Bra013 | 16  |    |   |    |     |      | UCCGUUGUCGUCCAGC | UAUGAUAAACCGAUGGA | Cleava |   |
| 4       | 584    | 3   | .4 | 1 | 26 | 885 | 910  | GGUUAGGAUA       | UGUCAAUGGA        | ge     | 1 |
| trf_3_8 | Bra000 | 11  |    |   |    |     |      | UCCGUUGUCGUCCAGC | UAACCGGAGGACGAUA  | Cleava |   |
| 4       | 529    | 3   | .2 | 1 | 21 | 984 | 1004 | GGUUA            | AUGGA             | ge     | 1 |
| trf_3_8 | Bra013 | 16  |    |   |    |     |      | UCCGUUGUCGUCCAGC | UAACCGAUGGAUGUCA  | Cleava |   |
| 5       | 584    | 3   | .4 | 1 | 21 | 890 | 910  | GGUUA            | AUGGA             | ge     | 1 |
| trf_3_8 | Bra000 | 11  |    |   |    |     |      | UCCGUUGUCGUCCAGC | UAACCGGAGGACGAUA  | Cleava |   |
| 5       | 529    | 3   | .2 | 1 | 21 | 984 | 1004 | GGUUA            | AUGGA             | ge     | 1 |
| trf_3_8 | Bra013 | 16  |    |   |    |     |      | UCCGUUGUCGUCCAGC | UAUGAUAAACCGAUGGA | Cleava |   |
| 6       | 584    | 3   | .4 | 1 | 26 | 885 | 910  | GGUUAGGAUA       | UGUCAAUGGA        | ge     | 1 |
| trf_3_8 | Bra000 | 11  |    |   |    |     |      | UCCGUUGUCGUCCAGC | UAACCGGAGGACGAUA  | Cleava |   |
| 6       | 529    | 3   | .2 | 1 | 21 | 984 | 1004 | GGUUA            | AUGGA             | ge     | 1 |
| trf_3_8 | Bra013 | 16  |    |   |    |     |      | UCCGUUGUCGUCCAGC | UAACCGAUGGAUGUCA  | Cleava |   |
| 7       | 584    | 3   | .4 | 1 | 21 | 890 | 910  | GGUUA            | AUGGA             | ge     | 1 |
| trf_3_8 | Bra000 | 11  |    |   |    |     |      | UCCGUUGUCGUCCAGC | UAACCGGAGGACGAUA  | Cleava |   |
| 7       | 529    | 3   | .2 | 1 | 21 | 984 | 1004 | GGUUA            | AUGGA             | ge     | 1 |
| trf_3_8 | Bra013 | 16  |    |   |    |     |      | UCCGUUGUCGUCCAGC | AACCGAUGGAUGUCAA  | Cleava |   |
| 9       | 584    | 3   | .4 | 1 | 20 | 891 | 910  | GGUU             | UGGA              | ge     | 1 |
| trf_3_8 | Bra000 | 11  |    |   |    |     |      | UCCGUUGUCGUCCAGC | AACCGGAGGACGAUAA  | Cleava |   |
| 9       | 529    | 3   | .2 | 1 | 20 | 985 | 1004 | GGUU             | UGGA              | ge     | 1 |
| trf_3_1 | Bra020 | 12  |    |   |    |     |      | GGGGAUGUAGCUCAAA | GCCAUUGGAGCUAUAU  | Cleava |   |
| 27      | 755    | 3   | .6 | 1 | 20 | 454 | 473  | UGGU             | UCUC              | ge     | 1 |

|         |        |    |    |   |    |      |      |                  |                   |          |   |
|---------|--------|----|----|---|----|------|------|------------------|-------------------|----------|---|
| trf_3_1 | Bra025 | 17 |    |   |    |      |      | GGGGAUGUAGCUCAAA | ACAAUUUGAGCUUCAU  | Cleavage |   |
| 27      | 904    | 3  | .2 | 1 | 20 | 344  | 363  | UGGU             | CUUC              | ge       | 1 |
| trf_3_1 | Bra024 | 7. |    |   |    |      |      | GGGGAUGUAGCUCAAA | AACAUUUCGGUUACAU  | Cleavage |   |
| 27      | 638    | 3  | 5  | 1 | 20 | 206  | 225  | UGGU             | CCCC              | ge       | 1 |
| trf_3_1 | Bra014 | 17 |    |   |    |      |      | GGGGAUGUAGCUCAUA | AUUUAUUUAGCUAUAU  | Cleavage |   |
| 28      | 507    | 3  | .0 | 1 | 20 | 544  | 563  | UGGU             | CUCC              | ge       | 1 |
| trf_3_1 | Bra002 | 10 |    |   |    |      |      | UGGAGUAUAGCCAAGU | CUUAUCACAU CGCUAU | Cleavage |   |
| 29      | 818    | 3  | .7 | 1 | 22 | 2389 | 2410 | GGUAAG           | ACUUCA            | ge       | 1 |
| trf_3_1 | Bra030 | 17 |    |   |    |      |      | UGGAGUAUAGCCAAGU | CUUAUCACAU CGCUAU | Cleavage |   |
| 29      | 402    | 3  | .0 | 1 | 22 | 1519 | 1540 | GGUAAG           | ACUUCA            | ge       | 2 |
| trf_3_1 | Bra030 | 17 |    |   |    |      |      | UGGAGUAUAGCCAAGU | CUUAUCACAU CGCUAU | Cleavage |   |
| 29      | 402    | 3  | .2 | 1 | 22 | 1993 | 2014 | GGUAAG           | ACUUCA            | ge       | 2 |
| trf_3_1 | Bra036 | 15 |    |   |    |      |      | UGGAGUAUAGCCAAGU | AAUCACUUGGUUAUUAU | Cleavage |   |
| 29      | 721    | 3  | .4 | 1 | 20 | 590  | 609  | GGUA             | UCUA              | ge       | 1 |
| trf_3_1 | Bra034 | 18 |    |   |    |      |      | UGGAGUAUAGCCAAGU | CAUUACCAAUGAGCUA  | Cleavage |   |
| 29      | 185    | 3  | .7 | 1 | 23 | 644  | 666  | GGUAAGG          | UACUCCA           | ge       | 1 |
| trf_3_1 | Bra020 | 12 |    |   |    |      |      | GGGGAUGUAGCUCAAA | GCCAUUGGAGCUAUUAU | Cleavage |   |
| 30      | 755    | 3  | .6 | 1 | 20 | 454  | 473  | UGGU             | UCUC              | ge       | 1 |
| trf_3_1 | Bra025 | 17 |    |   |    |      |      | GGGGAUGUAGCUCAAA | ACAAUUUGAGCUUCAU  | Cleavage |   |
| 30      | 904    | 3  | .2 | 1 | 20 | 344  | 363  | UGGU             | CUUC              | ge       | 1 |
| trf_3_1 | Bra024 | 7. |    |   |    |      |      | GGGGAUGUAGCUCAAA | AACAUUUCGGUUACAU  | Cleavage |   |
| 30      | 638    | 3  | 5  | 1 | 20 | 206  | 225  | UGGU             | CCCC              | ge       | 1 |
| trf_3_1 | Bra024 | 7. |    |   |    |      |      | GGGGAUGUAGCUCAAA | UUCCAACAUUUCGGUU  | Cleavage |   |
| 31      | 638    | 3  | 5  | 1 | 24 | 202  | 225  | UGGUAGAG         | ACAUCCCC          | ge       | 1 |
| trf_3_1 | Bra025 | 17 |    |   |    |      |      | GGGGAUGUAGCUCAAA | ACAAUUUGAGCUUCAU  | Cleavage |   |
| 31      | 904    | 3  | .2 | 1 | 20 | 344  | 363  | UGGU             | CUUC              | ge       | 1 |
| trf_3_1 | Bra019 | 12 |    |   |    |      |      | GACGGUUUGGCCGAGU | UGAGACUACUUGGUCC  | Cleavage |   |
| 34      | 760    | 3  | .5 | 1 | 23 | 1328 | 1350 | GGUCUAA          | AGCCGUC           | ge       | 1 |
| trf_3_1 | Bra000 | 16 |    |   |    |      |      | GACGGUUUGGCCGAGU | AACCAUUCGCGCCAAAU | Cleavage |   |
| 34      | 788    | 3  | .6 | 1 | 20 | 52   | 71   | GGUC             | GUC               | ge       | 1 |
| trf_3_1 | Bra003 | 24 |    |   |    |      |      | GACGGUUUGGCCGAGU | GGCGAUUCGCGCCAAAU | Cleavage |   |
| 34      | 534    | 3  | .7 | 1 | 20 | 3589 | 3608 | GGUC             | UGUC              | ge       | 1 |
| trf_3_1 | Bra002 | 10 |    |   |    |      |      | GACGGUUUGGCCGAGU | GACUUUCCGCGCCAAAC | Cleavage |   |
| 34      | 609    | 3  | .2 | 1 | 20 | 1237 | 1256 | GGUC             | CGUC              | ge       | 1 |

|         |        |     |    |   |    |      |      |                  |                   |        |   |
|---------|--------|-----|----|---|----|------|------|------------------|-------------------|--------|---|
| trf_3_1 | Bra007 | 14  |    |   |    |      |      | GCACCAGUGGUCUAGU | UUACUACUGGACCUUU  | Cleava |   |
| 36      | 154    | 2.5 | .1 | 1 | 21 | 510  | 530  | GGUAG            | GGUGC             | ge     | 1 |
| trf_3_1 | Bra007 | 14  |    |   |    |      |      | GCACCAGUGGUCUAGU | UUACUACUGGACCUUU  | Cleava |   |
| 39      | 154    | 2.5 | .1 | 1 | 21 | 510  | 530  | GGUAG            | GGUGC             | ge     | 1 |
| trf_3_1 | Bra000 | 15  |    |   |    |      |      | GGUUCUAUGGUCUAGC | GACCGCUGGACCAGAG  | Cleava |   |
| 40      | 719    | 3   | .3 | 1 | 20 | 1680 | 1699 | GGUU             | AACU              | ge     | 1 |
| trf_3_1 | Bra014 | 21  |    |   |    |      |      | GGUUCUAUGGUCUAGC | AGCUGCUAGACCUUGG  | Cleava |   |
| 40      | 489    | 3   | .1 | 1 | 20 | 168  | 187  | GGUU             | GACC              | ge     | 1 |
| trf_3_1 | Bra005 | 12  |    |   |    |      |      | GUGGCUGUAGUUUAG  | CUCACCGCUGAACUAU  | Cleava |   |
| 52      | 511    | 2.5 | .8 | 1 | 22 | 1113 | 1134 | UGGUGAG          | GGCUAC            | ge     | 1 |
| trf_3_1 | Bra035 | 17  |    |   |    |      |      | GUGGCUGUAGUUUAG  | UUCAUCUCUAGGCUAC  | Cleava |   |
| 52      | 454    | 3   | .9 | 1 | 22 | 1243 | 1264 | UGGUGAG          | AGCCAU            | ge     | 1 |
| trf_3_1 | Bra009 | 12  |    |   |    |      |      | GUGGCUGUAGUUUAG  | CAACAUUGAGCUACAG  | Cleava |   |
| 52      | 047    | 3   | .1 | 1 | 20 | 243  | 262  | UGGUG            | CCAU              | ge     | 1 |
| trf_3_1 | Bra005 | 12  |    |   |    |      |      | GUGGCUGUAGUUUAG  | CUCACCGCUGAACUAU  | Cleava |   |
| 53      | 511    | 2.5 | .8 | 1 | 22 | 1113 | 1134 | UGGUGAG          | GGCUAC            | ge     | 1 |
| trf_3_1 | Bra035 | 17  |    |   |    |      |      | GUGGCUGUAGUUUAG  | UAUUCAUCUCUAGGCU  | Cleava |   |
| 53      | 454    | 3   | .9 | 1 | 24 | 1241 | 1264 | UGGUGAGAA        | ACAGCCAU          | ge     | 1 |
| trf_3_1 | Bra009 | 12  |    |   |    |      |      | GUGGCUGUAGUUUAG  | CAACAUUGAGCUACAG  | Cleava |   |
| 53      | 047    | 3   | .1 | 1 | 20 | 243  | 262  | UGGUG            | CCAU              | ge     | 1 |
| trf_3_1 | Bra009 | 14  |    |   |    |      |      | GGGGAUGUAGCUCAGA | AUCAUCUGGGCUUCGU  | Cleava |   |
| 59      | 876    | 3   | .9 | 1 | 20 | 18   | 37   | UGGU             | CCUC              | ge     | 1 |
| trf_3_1 | Bra016 | 10  |    |   |    |      |      | GGGGAUGUAGCUCAGA | AUCAUCUGAGCUUCGU  | Cleava |   |
| 59      | 141    | 3   | .4 | 1 | 20 | 3033 | 3052 | UGGU             | UCUC              | ge     | 1 |
| trf_3_1 | Bra036 | 20  |    |   |    |      |      | GGGGAUGUAGCUCAGA | ACUGGCUGAGCUACAU  | Cleava |   |
| 59      | 771    | 3   | .2 | 1 | 20 | 5378 | 5397 | UGGU             | UCCU              | ge     | 1 |
| trf_3_1 | Bra018 | 8.  |    |   |    |      |      | GGGGAUGUAGCUCAGA | GCCACCUCAGCUACAUC | Cleava |   |
| 59      | 620    | 3   | 3  | 1 | 20 | 7    | 26   | UGGU             | CUC               | ge     | 1 |
| trf_3_1 | Bra007 | 14  |    |   |    |      |      | GCACCAGUGGUCUAGU | UUACUACUGGACCUUU  | Cleava |   |
| 61      | 154    | 2.5 | .1 | 1 | 21 | 510  | 530  | GGUAG            | GGUGC             | ge     | 1 |
| trf_3_1 | Bra013 | 22  |    |   |    |      |      | UCCGUUGUAGUCUAGC | CAUCAUCAGCUUGGCU  | Cleava |   |
| 65      | 528    | 3   | .0 | 1 | 24 | 196  | 219  | UGGUCAGG         | AUAACGGG          | ge     | 1 |
| trf_3_1 | Bra007 | 14  |    |   |    |      |      | GCACCAGUGGUCUAGU | UUACUACUGGACCUUU  | Cleava |   |
| 66      | 154    | 2.5 | .1 | 1 | 21 | 510  | 530  | GGUAG            | GGUGC             | ge     | 1 |

|         |        |     |    |   |    |      |      |                  |                   |        |   |
|---------|--------|-----|----|---|----|------|------|------------------|-------------------|--------|---|
| trf_3_1 | Bra009 | 14  |    |   |    |      |      | GGGGAUGUAGCUCAGA | UUAUCAUCUGGGCUUC  | Cleava |   |
| 67      | 876    | 3   | .9 | 1 | 22 | 16   | 37   | UGGUAG           | GUCCUC            | ge     | 1 |
| trf_3_1 | Bra016 | 10  |    |   |    |      |      | GGGGAUGUAGCUCAGA | UUAUCAUCUGAGCUUC  | Cleava |   |
| 67      | 141    | 3   | .4 | 1 | 22 | 3031 | 3052 | UGGUAG           | GUUCUC            | ge     | 1 |
| trf_3_1 | Bra036 | 20  |    |   |    |      |      | GGGGAUGUAGCUCAGA | UCGACUGGCUGAGCUA  | Cleava |   |
| 67      | 771    | 3   | .2 | 1 | 23 | 5375 | 5397 | UGGUAGA          | CAUUCCU           | ge     | 1 |
| trf_3_1 | Bra018 | 8.  |    |   |    |      |      | GGGGAUGUAGCUCAGA | GCCACCUCAGCUACAUC | Cleava |   |
| 67      | 620    | 3   | 3  | 1 | 20 | 7    | 26   | UGGU             | CUC               | ge     | 1 |
| trf_3_1 | Bra002 | 16  |    |   |    |      |      | AGGGAUAUAACUCAGC | CUGCUGCUGAGUUCUA  | Cleava |   |
| 95      | 746    | 3   | .3 | 1 | 21 | 218  | 238  | GGUAG            | UCCCA             | ge     | 1 |
| trf_3_1 | Bra012 | 14  |    |   |    |      |      | AGGGAUAUAACUCAGC | UACCUUUGAGUUAUG   | Cleava |   |
| 95      | 734    | 3   | .1 | 1 | 20 | 1709 | 1728 | GGUA             | UUUCU             | ge     | 1 |
| trf_3_2 | Bra000 | 15  |    |   |    |      |      | GGUUCUAUGGUCUAGC | GACCGCUGGACCAGAG  | Cleava |   |
| 09      | 719    | 3   | .3 | 1 | 20 | 1680 | 1699 | GGUU             | AACU              | ge     | 1 |
| trf_3_2 | Bra014 | 21  |    |   |    |      |      | GGUUCUAUGGUCUAGC | AGCUGCUAGACCUUGG  | Cleava |   |
| 09      | 489    | 3   | .1 | 1 | 20 | 168  | 187  | GGUU             | GACC              | ge     | 1 |
| trf_3_2 | Bra000 | 11  |    |   |    |      |      | UCCGUUAUCGUCCAGC | UAACCGGAGGACGAUA  | Cleava |   |
| 11      | 529    | 2.5 | .2 | 1 | 21 | 984  | 1004 | GGUUA            | AUGGA             | ge     | 1 |
| trf_3_2 | Bra032 | 22  |    |   |    |      |      | UCCGUUAUCGUCCAGC | GACGGCUUGACGAUGA  | Cleava |   |
| 11      | 111    | 3   | .4 | 1 | 20 | 727  | 746  | GGUU             | CGGA              | ge     | 1 |
| trf_3_2 | Bra000 | 11  |    |   |    |      |      | UCCGUUAUCGUCCAGC | UAACCGGAGGACGAUA  | Cleava |   |
| 12      | 529    | 2.5 | .2 | 1 | 21 | 984  | 1004 | GGUUA            | AUGGA             | ge     | 1 |
| trf_3_2 | Bra032 | 22  |    |   |    |      |      | UCCGUUAUCGUCCAGC | GACGGCUUGACGAUGA  | Cleava |   |
| 12      | 111    | 3   | .4 | 1 | 20 | 727  | 746  | GGUU             | CGGA              | ge     | 1 |
| trf_3_2 | Bra000 | 11  |    |   |    |      |      | UCCGUUAUCGUCCAGC | UAACCGGAGGACGAUA  | Cleava |   |
| 14      | 529    | 2.5 | .2 | 1 | 21 | 984  | 1004 | GGUUA            | AUGGA             | ge     | 1 |
| trf_3_2 | Bra032 | 22  |    |   |    |      |      | UCCGUUAUCGUCCAGC | GACGGCUUGACGAUGA  | Cleava |   |
| 14      | 111    | 3   | .4 | 1 | 20 | 727  | 746  | GGUU             | CGGA              | ge     | 1 |
| trf_3_2 | Bra000 | 11  |    |   |    |      |      | UCCGUUAUCGUCCAGC | UAACCGGAGGACGAUA  | Cleava |   |
| 15      | 529    | 2.5 | .2 | 1 | 21 | 984  | 1004 | GGUUA            | AUGGA             | ge     | 1 |
| trf_3_2 | Bra032 | 22  |    |   |    |      |      | UCCGUUAUCGUCCAGC | GACGGCUUGACGAUGA  | Cleava |   |
| 15      | 111    | 3   | .4 | 1 | 20 | 727  | 746  | GGUU             | CGGA              | ge     | 1 |
| trf_3_2 | Bra000 | 11  |    |   |    |      |      | UCCGUUAUCGUCCAGC | UAACCGGAGGACGAUA  | Cleava |   |
| 16      | 529    | 2.5 | .2 | 1 | 21 | 984  | 1004 | GGUUA            | AUGGA             | ge     | 1 |

|         |        |     |    |   |    |      |      |                  |                   |        |   |
|---------|--------|-----|----|---|----|------|------|------------------|-------------------|--------|---|
| trf_3_2 | Bra032 | 22  |    |   |    |      |      | UCCGUUAUCGUCCAGC | GACGGCUUGACGAUGA  | Cleava |   |
| 16      | 111    | 3   | .4 | 1 | 20 | 727  | 746  | GGUU             | CGGA              | ge     | 1 |
| trf_3_2 | Bra000 | 11  |    |   |    |      |      | UCCGUUAUCGUCCANC | UAACCGGAGGACGAUA  | Cleava |   |
| 17      | 529    | 2.5 | .2 | 1 | 21 | 984  | 1004 | GGUUA            | AUGGA             | ge     | 1 |
| trf_3_2 | Bra000 | 11  |    |   |    |      |      | UCCGUUAUCGUCCAGC | UAACCGGAGGACGAUA  | Cleava |   |
| 18      | 529    | 2.5 | .2 | 1 | 21 | 984  | 1004 | GGUUA            | AUGGA             | ge     | 1 |
| trf_3_2 | Bra032 | 22  |    |   |    |      |      | UCCGUUAUCGUCCAGC | GACGGCUUGACGAUGA  | Cleava |   |
| 18      | 111    | 3   | .4 | 1 | 20 | 727  | 746  | GGUU             | CGGA              | ge     | 1 |
| trf_3_2 | Bra000 | 11  |    |   |    |      |      | UCCGUUAUCGUCCAGC | AACCGGAGGACGAUAA  | Cleava |   |
| 20      | 529    | 2.5 | .2 | 1 | 20 | 985  | 1004 | GGUU             | UGGA              | ge     | 1 |
| trf_3_2 | Bra032 | 22  |    |   |    |      |      | UCCGUUAUCGUCCAGC | GACGGCUUGACGAUGA  | Cleava |   |
| 20      | 111    | 3   | .4 | 1 | 20 | 727  | 746  | GGUU             | CGGA              | ge     | 1 |
| trf_3_2 | Bra000 | 11  |    |   |    |      |      | UCCGUUAUCGUCCAGC | UAACCGGAGGACGAUA  | Cleava |   |
| 21      | 529    | 2.5 | .2 | 1 | 21 | 984  | 1004 | GGUUA            | AUGGA             | ge     | 1 |
| trf_3_2 | Bra032 | 22  |    |   |    |      |      | UCCGUUAUCGUCCAGC | GACGGCUUGACGAUGA  | Cleava |   |
| 21      | 111    | 3   | .4 | 1 | 20 | 727  | 746  | GGUU             | CGGA              | ge     | 1 |
| trf_3_2 | Bra009 | 14  |    |   |    |      |      | GGGGAUGUAGCUCAGA | AUCAUCUGGGCUUCGU  | Cleava |   |
| 38      | 876    | 3   | .9 | 1 | 20 | 18   | 37   | UGGU             | CCUC              | ge     | 1 |
| trf_3_2 | Bra016 | 10  |    |   |    |      |      | GGGGAUGUAGCUCAGA | AUCAUCUGAGCUUCGU  | Cleava |   |
| 38      | 141    | 3   | .4 | 1 | 20 | 3033 | 3052 | UGGU             | UCUC              | ge     | 1 |
| trf_3_2 | Bra036 | 20  |    |   |    |      |      | GGGGAUGUAGCUCAGA | ACUGGCUGAGCUACAU  | Cleava |   |
| 38      | 771    | 3   | .2 | 1 | 20 | 5378 | 5397 | UGGU             | UCCU              | ge     | 1 |
| trf_3_2 | Bra018 | 8.  |    |   |    |      |      | GGGGAUGUAGCUCAGA | GCCACCUCAGCUACAUC | Cleava |   |
| 38      | 620    | 3   | 3  | 1 | 20 | 7    | 26   | UGGU             | CUC               | ge     | 1 |
| trf_3_2 | Bra007 | 14  |    |   |    |      |      | GCACCAGUGGUCUAGU | UUACUACUGGACCUUU  | Cleava |   |
| 40      | 154    | 2.5 | .1 | 1 | 21 | 510  | 530  | GGUAG            | GGUGC             | ge     | 1 |
| trf_3_2 | Bra013 | 16  |    |   |    |      |      | UCCGUUGUCGUCCAGC | UAUGAUAAACCGAUGGA | Cleava |   |
| 58      | 584    | 3   | .4 | 1 | 26 | 885  | 910  | GGUUAGGAUA       | UGUCA AUGGA       | ge     | 1 |
| trf_3_2 | Bra000 | 11  |    |   |    |      |      | UCCGUUGUCGUCCAGC | UAACCGGAGGACGAUA  | Cleava |   |
| 58      | 529    | 3   | .2 | 1 | 21 | 984  | 1004 | GGUUA            | AUGGA             | ge     | 1 |
| trf_3_2 | Bra013 | 16  |    |   |    |      |      | UCCGUUGUCGUCCAGC | AACCGAUGGAUGUCAAA | Cleava |   |
| 59      | 584    | 3   | .4 | 1 | 20 | 891  | 910  | GGUU             | UGGA              | ge     | 1 |
| trf_3_2 | Bra000 | 11  |    |   |    |      |      | UCCGUUGUCGUCCAGC | AACCGGAGGACGAUAA  | Cleava |   |
| 59      | 529    | 3   | .2 | 1 | 20 | 985  | 1004 | GGUU             | UGGA              | ge     | 1 |

|         |        |     |    |   |    |     |      |                  |                   |        |   |
|---------|--------|-----|----|---|----|-----|------|------------------|-------------------|--------|---|
| trf_3_2 | Bra013 | 16  |    |   |    |     |      | UCCGUUGUCGUCCAGC | UAACCGAUGGAUGUCA  | Cleava |   |
| 60      | 584    | 3   | .4 | 1 | 21 | 890 | 910  | GGUUA            | AUGGA             | ge     | 1 |
| trf_3_2 | Bra000 | 11  |    |   |    |     |      | UCCGUUGUCGUCCAGC | UAACCGGAGGACGAUA  | Cleava |   |
| 60      | 529    | 3   | .2 | 1 | 21 | 984 | 1004 | GGUUA            | AUGGA             | ge     | 1 |
| trf_3_2 | Bra013 | 16  |    |   |    |     |      | UCCGUUGUCGUCCAGC | AUGAUAAACCGAUGGAU | Cleava |   |
| 61      | 584    | 3   | .4 | 1 | 25 | 886 | 910  | GGUUAGGAU        | GUCAAUGGA         | ge     | 1 |
| trf_3_2 | Bra000 | 11  |    |   |    |     |      | UCCGUUGUCGUCCAGC | UAACCGGAGGACGAUA  | Cleava |   |
| 61      | 529    | 3   | .2 | 1 | 21 | 984 | 1004 | GGUUA            | AUGGA             | ge     | 1 |
| trf_3_2 | Bra013 | 16  |    |   |    |     |      | UCCGUUGUCGUCCAGC | UAUGAUAAACCGAUGGA | Cleava |   |
| 63      | 584    | 3   | .4 | 1 | 26 | 885 | 910  | GGUUAGGAUA       | UGUCA AUGGA       | ge     | 1 |
| trf_3_2 | Bra000 | 11  |    |   |    |     |      | UCCGUUGUCGUCCAGC | UAACCGGAGGACGAUA  | Cleava |   |
| 63      | 529    | 3   | .2 | 1 | 21 | 984 | 1004 | GGUUA            | AUGGA             | ge     | 1 |
| trf_3_2 | Bra013 | 16  |    |   |    |     |      | UCCGUUGUCGUCCAGC | UAACCGAUGGAUGUCA  | Cleava |   |
| 64      | 584    | 3   | .4 | 1 | 21 | 890 | 910  | GGUUA            | AUGGA             | ge     | 1 |
| trf_3_2 | Bra000 | 11  |    |   |    |     |      | UCCGUUGUCGUCCAGC | UAACCGGAGGACGAUA  | Cleava |   |
| 64      | 529    | 3   | .2 | 1 | 21 | 984 | 1004 | GGUUA            | AUGGA             | ge     | 1 |
| trf_3_2 | Bra013 | 16  |    |   |    |     |      | UCCGUUGUCGUCCAGC | UAACCGAUGGAUGUCA  | Cleava |   |
| 67      | 584    | 3   | .4 | 1 | 21 | 890 | 910  | GGUUA            | AUGGA             | ge     | 1 |
| trf_3_2 | Bra000 | 11  |    |   |    |     |      | UCCGUUGUCGUCCAGC | UAACCGGAGGACGAUA  | Cleava |   |
| 67      | 529    | 3   | .2 | 1 | 21 | 984 | 1004 | GGUUA            | AUGGA             | ge     | 1 |
| trf_3_2 | Bra007 | 14  |    |   |    |     |      | GCACCAGUGGUCUAGU | UUACUACUGGACCUUU  | Cleava |   |
| 68      | 154    | 2.5 | .1 | 1 | 21 | 510 | 530  | GGUAG            | GGUGC             | ge     | 1 |
| trf_3_2 | Bra007 | 14  |    |   |    |     |      | GCACCAGUGGUCUAGU | UUACUACUGGACCUUU  | Cleava |   |
| 75      | 154    | 2.5 | .1 | 1 | 21 | 510 | 530  | GGUAG            | GGUGC             | ge     | 1 |
| trf_3_2 | Bra007 | 14  |    |   |    |     |      | GCACCAGUGGUCUAGU | UUACUACUGGACCUUU  | Cleava |   |
| 79      | 154    | 2.5 | .1 | 1 | 21 | 510 | 530  | GGUAG            | GGUGC             | ge     | 1 |
| trf_3_2 | Bra013 | 22  |    |   |    |     |      | UCCGUUGUAGUCUAGC | AUCAGCUUGGCUAUAA  | Cleava |   |
| 80      | 528    | 3   | .0 | 1 | 20 | 200 | 219  | UGGU             | CGGG              | ge     | 1 |
| trf_3_2 | Bra007 | 14  |    |   |    |     |      | GCACCAGUGGUCUAGU | UUACUACUGGACCUUU  | Cleava |   |
| 81      | 154    | 2.5 | .1 | 1 | 21 | 510 | 530  | GGUAG            | GGUGC             | ge     | 1 |
| trf_3_2 | Bra013 | 16  |    |   |    |     |      | UCCGUUGUCGUCCAGC | AACCGAUGGAUGUCA   | Cleava |   |
| 88      | 584    | 3   | .4 | 1 | 20 | 891 | 910  | GGUU             | UGGA              | ge     | 1 |
| trf_3_2 | Bra000 | 11  |    |   |    |     |      | UCCGUUGUCGUCCAGC | AACCGGAGGACGAUAA  | Cleava |   |
| 88      | 529    | 3   | .2 | 1 | 20 | 985 | 1004 | GGUU             | UGGA              | ge     | 1 |



|         |        |     |    |   |    |      |      |                  |                   |        |   |
|---------|--------|-----|----|---|----|------|------|------------------|-------------------|--------|---|
| trf_3_2 | Bra013 | 16  |    |   |    |      |      | UCCGUUGUCGUCCAGC | AUGAUAACCGAUGGAU  | Cleava |   |
| 89      | 584    | 3   | .4 | 1 | 25 | 886  | 910  | GGUUAGGAU        | GUCAAUGGA         | ge     | 1 |
| trf_3_2 | Bra000 | 11  |    |   |    |      |      | UCCGUUGUCGUCCAGC | UAACCGGAGGACGAUA  | Cleava |   |
| 89      | 529    | 3   | .2 | 1 | 21 | 984  | 1004 | GGUUA            | AUGGA             | ge     | 1 |
| trf_3_2 | Bra013 | 16  |    |   |    |      |      | UCCGUUGUCGUCCAGC | UAACCGAUGGAUGUCA  | Cleava |   |
| 90      | 584    | 3   | .4 | 1 | 21 | 890  | 910  | GGUUA            | AUGGA             | ge     | 1 |
| trf_3_2 | Bra000 | 11  |    |   |    |      |      | UCCGUUGUCGUCCAGC | UAACCGGAGGACGAUA  | Cleava |   |
| 90      | 529    | 3   | .2 | 1 | 21 | 984  | 1004 | GGUUA            | AUGGA             | ge     | 1 |
| trf_3_2 | Bra013 | 16  |    |   |    |      |      | UCCGUUGUCGUCCAGC | UAUGAUAACCGAUGGA  | Cleava |   |
| 91      | 584    | 3   | .4 | 1 | 26 | 885  | 910  | GGUUAGGAUA       | UGUCA AUGGA       | ge     | 1 |
| trf_3_2 | Bra000 | 11  |    |   |    |      |      | UCCGUUGUCGUCCAGC | UAACCGGAGGACGAUA  | Cleava |   |
| 91      | 529    | 3   | .2 | 1 | 21 | 984  | 1004 | GGUUA            | AUGGA             | ge     | 1 |
| trf_3_2 | Bra013 | 16  |    |   |    |      |      | UCCGUUGUCGUCCAGC | UAACCGAUGGAUGUCA  | Cleava |   |
| 92      | 584    | 3   | .4 | 1 | 21 | 890  | 910  | GGUUA            | AUGGA             | ge     | 1 |
| trf_3_2 | Bra000 | 11  |    |   |    |      |      | UCCGUUGUCGUCCAGC | UAACCGGAGGACGAUA  | Cleava |   |
| 92      | 529    | 3   | .2 | 1 | 21 | 984  | 1004 | GGUUA            | AUGGA             | ge     | 1 |
| trf_3_2 | Bra013 | 16  |    |   |    |      |      | UCCGUUGUCGUCCAGC | UAACCGAUGGAUGUCA  | Cleava |   |
| 94      | 584    | 3   | .4 | 1 | 21 | 890  | 910  | GGUUA            | AUGGA             | ge     | 1 |
| trf_3_2 | Bra000 | 11  |    |   |    |      |      | UCCGUUGUCGUCCAGC | UAACCGGAGGACGAUA  | Cleava |   |
| 94      | 529    | 3   | .2 | 1 | 21 | 984  | 1004 | GGUUA            | AUGGA             | ge     | 1 |
| trf_3_2 | Bra014 | 17  |    |   |    |      |      | GGGGAUGUAGCUCAUA | AUUUAUUUAGCUAUAU  | Cleava |   |
| 97      | 507    | 3   | .0 | 1 | 20 | 544  | 563  | UGGU             | CUCC              | ge     | 1 |
| trf_3_2 | Bra016 | 20  |    |   |    |      |      | UCCGUCGUAGUCUAGC | CUGAAGAAGCUAGGCU  | Cleava |   |
| 98      | 601    | 3   | .8 | 1 | 24 | 415  | 438  | UGGUUAGG         | GCGACGGA          | ge     | 1 |
| trf_3_3 | Bra016 | 20  |    |   |    |      |      | UCCGUCGUAGUCUAGC | CUGAAGAAGCUAGGCU  | Cleava |   |
| 00      | 601    | 3   | .8 | 1 | 24 | 415  | 438  | UGGUUAGG         | GCGACGGA          | ge     | 1 |
| trf_3_3 | Bra016 | 20  |    |   |    |      |      | UCCGUCGUAGUCUAGC | CUGAAGAAGCUAGGCU  | Cleava |   |
| 01      | 601    | 3   | .8 | 1 | 24 | 415  | 438  | UGGUUAGG         | GCGACGGA          | ge     | 1 |
| trf_3_3 | Bra016 | 20  |    |   |    |      |      | UCCGUCGUAGUCUAGC | AAGAAGCUAGGCU GCG | Cleava |   |
| 02      | 601    | 3   | .8 | 1 | 21 | 418  | 438  | UGGUU            | ACGGA             | ge     | 1 |
| trf_3_3 | Bra005 | 12  |    |   |    |      |      | GUGGCUGUAGUUUAG  | CUCACCGCUGAACUAU  | Cleava |   |
| 03      | 511    | 2.5 | .8 | 1 | 22 | 1113 | 1134 | UGGUGAG          | GGCUAC            | ge     | 1 |
| trf_3_3 | Bra035 | 17  |    |   |    |      |      | GUGGCUGUAGUUUAG  | UUCAUCUCUAGGCUAC  | Cleava |   |
| 03      | 454    | 3   | .9 | 1 | 22 | 1243 | 1264 | UGGUGAG          | AGCCAU            | ge     | 1 |

|         |        |     |    |   |    |      |      |                  |                   |        |   |
|---------|--------|-----|----|---|----|------|------|------------------|-------------------|--------|---|
| trf_3_3 | Bra009 | 12  |    |   |    |      |      | GUGGCUGUAGUUUAG  | CAACAUUGAGCUACAG  | Cleava |   |
| 03      | 047    | 3   | .1 | 1 | 20 | 243  | 262  | UGGUG            | CCAU              | ge     | 1 |
| trf_3_3 | Bra013 | 22  |    |   |    |      |      | UCCGUUGUAGUCUAGC | CAUCAUCAGCUUGGCU  | Cleava |   |
| 08      | 528    | 3   | .0 | 1 | 24 | 196  | 219  | UGGUCAGG         | AUAACGGG          | ge     | 1 |
| trf_3_3 | Bra009 | 14  |    |   |    |      |      | GGGGAUGUAGCUCAGA | AUCAUCUGGGCUUCGU  | Cleava |   |
| 10      | 876    | 3   | .9 | 1 | 20 | 18   | 37   | UGGU             | CCUC              | ge     | 1 |
| trf_3_3 | Bra016 | 10  |    |   |    |      |      | GGGGAUGUAGCUCAGA | AUCAUCUGAGCUUCGU  | Cleava |   |
| 10      | 141    | 3   | .4 | 1 | 20 | 3033 | 3052 | UGGU             | UCUC              | ge     | 1 |
| trf_3_3 | Bra036 | 20  |    |   |    |      |      | GGGGAUGUAGCUCAGA | ACUGGCUGAGCUACAU  | Cleava |   |
| 10      | 771    | 3   | .2 | 1 | 20 | 5378 | 5397 | UGGU             | UCCU              | ge     | 1 |
| trf_3_3 | Bra018 | 8.  |    |   |    |      |      | GGGGAUGUAGCUCAGA | GCCACCUCAGCUACAUC | Cleava |   |
| 10      | 620    | 3   | 3  | 1 | 20 | 7    | 26   | UGGU             | CUC               | ge     | 1 |
| trf_3_3 | Bra009 | 14  |    |   |    |      |      | GGGGAUGUAGCUCAGA | UUAUCAUCUGGGCUUC  | Cleava |   |
| 13      | 876    | 3   | .9 | 1 | 22 | 16   | 37   | UGGUAG           | GUCCUC            | ge     | 1 |
| trf_3_3 | Bra016 | 10  |    |   |    |      |      | GGGGAUGUAGCUCAGA | UUAUCAUCUGAGCUUC  | Cleava |   |
| 13      | 141    | 3   | .4 | 1 | 22 | 3031 | 3052 | UGGUAG           | GUUCUC            | ge     | 1 |
| trf_3_3 | Bra036 | 20  |    |   |    |      |      | GGGGAUGUAGCUCAGA | UCGACUGGCUGAGCUA  | Cleava |   |
| 13      | 771    | 3   | .2 | 1 | 23 | 5375 | 5397 | UGGUAGA          | CAUUCCU           | ge     | 1 |
| trf_3_3 | Bra018 | 8.  |    |   |    |      |      | GGGGAUGUAGCUCAGA | GCCACCUCAGCUACAUC | Cleava |   |
| 13      | 620    | 3   | 3  | 1 | 20 | 7    | 26   | UGGU             | CUC               | ge     | 1 |
| trf_3_3 | Bra007 | 20  |    |   |    |      |      | GAUAGUUUGGCCGAGU | GGACCAUUCUGUCAAG  | Cleava |   |
| 14      | 942    | 2.5 | .9 | 1 | 21 | 1425 | 1445 | GGUCU            | CUAUC             | ge     | 1 |
| trf_3_3 | Bra028 | 14  |    |   |    |      |      | GAUAGUUUGGCCGAGU | GGACCACGCGGUUAGA  | Cleava |   |
| 14      | 573    | 3   | .6 | 1 | 21 | 270  | 290  | GGUCU            | CUAUU             | ge     | 1 |
| trf_3_3 | Bra003 | 24  |    |   |    |      |      | GAUAGUUUGGCCGAGU | GGCGAUUCGGCCAAAU  | Cleava |   |
| 14      | 534    | 3   | .7 | 1 | 20 | 3589 | 3608 | GGUC             | UGUC              | ge     | 1 |
| trf_3_3 | Bra015 | 16  |    |   |    |      |      | GAUAGUUUGGCCGAGU | GAUAACUUUGCCAAAC  | Cleava |   |
| 14      | 687    | 3   | .3 | 1 | 20 | 880  | 899  | GGUC             | UAUC              | ge     | 1 |
| trf_3_3 | Bra007 | 20  |    |   |    |      |      | GAUAGUUUGGCCGAGU | GGACCAUUCUGUCAAG  | Cleava |   |
| 15      | 942    | 2.5 | .9 | 1 | 21 | 1425 | 1445 | GGUCU            | CUAUC             | ge     | 1 |
| trf_3_3 | Bra028 | 14  |    |   |    |      |      | GAUAGUUUGGCCGAGU | GGACCACGCGGUUAGA  | Cleava |   |
| 15      | 573    | 3   | .6 | 1 | 21 | 270  | 290  | GGUCU            | CUAUU             | ge     | 1 |
| trf_3_3 | Bra003 | 24  |    |   |    |      |      | GAUAGUUUGGCCGAGU | GGCGAUUCGGCCAAAU  | Cleava |   |
| 15      | 534    | 3   | .7 | 1 | 20 | 3589 | 3608 | GGUC             | UGUC              | ge     | 1 |

|         |        |     |    |   |    |      |      |                  |                   |        |   |
|---------|--------|-----|----|---|----|------|------|------------------|-------------------|--------|---|
| trf_3_3 | Bra015 | 16  |    |   |    |      |      | GAUAGUUUGGCCGAGU | GAUAACUUUGCCAAAC  | Cleava |   |
| 15      | 687    | 3   | .3 | 1 | 20 | 880  | 899  | GGUC             | UAUC              | ge     | 1 |
| trf_3_3 | Bra009 | 14  |    |   |    |      |      | GGGGAUGUAGCUCAGA | AUCAUCUGGGCUUCGU  | Cleava |   |
| 16      | 876    | 3   | .9 | 1 | 20 | 18   | 37   | UGGU             | CCUC              | ge     | 1 |
| trf_3_3 | Bra016 | 10  |    |   |    |      |      | GGGGAUGUAGCUCAGA | AUCAUCUGAGCUUCGU  | Cleava |   |
| 16      | 141    | 3   | .4 | 1 | 20 | 3033 | 3052 | UGGU             | UCUC              | ge     | 1 |
| trf_3_3 | Bra036 | 20  |    |   |    |      |      | GGGGAUGUAGCUCAGA | ACUGGCUGAGCUACAU  | Cleava |   |
| 16      | 771    | 3   | .2 | 1 | 20 | 5378 | 5397 | UGGU             | UCCU              | ge     | 1 |
| trf_3_3 | Bra018 | 8.  |    |   |    |      |      | GGGGAUGUAGCUCAGA | GCCACCUCAGCUACAUC | Cleava |   |
| 16      | 620    | 3   | 3  | 1 | 20 | 7    | 26   | UGGU             | CUC               | ge     | 1 |
| trf_3_3 | Bra007 | 14  |    |   |    |      |      | GCACCAGUGGUCUAGU | UUACUACUGGACCUUU  | Cleava |   |
| 20      | 154    | 2.5 | .1 | 1 | 21 | 510  | 530  | GGUAG            | GGUGC             | ge     | 1 |
| trf_3_3 | Bra023 | 16  |    |   |    |      |      | GUCUGGUUGGUGUAG  | UCCGACAGUACCAAUC  | Cleava |   |
| 22      | 121    | 2.5 | .9 | 1 | 20 | 661  | 680  | UCGGA            | AGAC              | ge     | 1 |
| trf_3_3 | Bra039 | 13  |    |   |    |      |      | GUCUGGUUGGUGUAG  | UCCGACCGUACCGAUC  | Cleava |   |
| 22      | 594    | 3   | .8 | 1 | 20 | 280  | 299  | UCGGA            | AGAC              | ge     | 1 |
| trf_3_3 | Bra023 | 15  |    |   |    |      |      | GUCUGGUUGGUGUAG  | UCCGACAACACCAACCA | Cleava |   |
| 22      | 936    | 3   | .5 | 1 | 20 | 505  | 524  | UCGGA            | CAU               | ge     | 1 |
| trf_3_3 | Bra012 | 12  |    |   |    |      |      | GUCUGGUUGGUGUAG  | UCCGACAAUACCAACCA | Cleava |   |
| 22      | 539    | 3   | .0 | 1 | 20 | 3001 | 3020 | UCGGA            | GUC               | ge     | 1 |
| trf_3_3 | Bra025 | 18  |    |   |    |      |      | GUCUGGUUGGUGUAG  | UCCGCCUCCACCAGCUA | Cleava |   |
| 22      | 413    | 3   | .8 | 1 | 20 | 1299 | 1318 | UCGGA            | GAC               | ge     | 1 |
| trf_3_3 | Bra007 | 14  |    |   |    |      |      | GCACCAGUGGUCUAGU | UUACUACUGGACCUUU  | Cleava |   |
| 40      | 154    | 2.5 | .1 | 1 | 21 | 510  | 530  | GGUAG            | GGUGC             | ge     | 1 |
| trf_3_3 | Bra009 | 14  |    |   |    |      |      | GGGGAUGUAGCUCAGA | AUCAUCUGGGCUUCGU  | Cleava |   |
| 46      | 876    | 3   | .9 | 1 | 20 | 18   | 37   | UGGU             | CCUC              | ge     | 1 |
| trf_3_3 | Bra016 | 10  |    |   |    |      |      | GGGGAUGUAGCUCAGA | AUCAUCUGAGCUUCGU  | Cleava |   |
| 46      | 141    | 3   | .4 | 1 | 20 | 3033 | 3052 | UGGU             | UCUC              | ge     | 1 |
| trf_3_3 | Bra036 | 20  |    |   |    |      |      | GGGGAUGUAGCUCAGA | ACUGGCUGAGCUACAU  | Cleava |   |
| 46      | 771    | 3   | .2 | 1 | 20 | 5378 | 5397 | UGGU             | UCCU              | ge     | 1 |
| trf_3_3 | Bra018 | 8.  |    |   |    |      |      | GGGGAUGUAGCUCAGA | GCCACCUCAGCUACAUC | Cleava |   |
| 46      | 620    | 3   | 3  | 1 | 20 | 7    | 26   | UGGU             | CUC               | ge     | 1 |
| trf_3_3 | Bra020 | 12  |    |   |    |      |      | GGGGAUGUAGCUCAA  | GCCAUUGGAGCUAUAU  | Cleava |   |
| 47      | 755    | 3   | .6 | 1 | 20 | 454  | 473  | UGGU             | UCUC              | ge     | 1 |

|         |        |     |    |   |    |      |      |                  |                   |        |   |
|---------|--------|-----|----|---|----|------|------|------------------|-------------------|--------|---|
| trf_3_3 | Bra025 | 17  |    |   |    |      |      | GGGGAUGUAGCUCAAA | ACAAUUUGAGCUUCAU  | Cleava |   |
| 47      | 904    | 3   | .2 | 1 | 20 | 344  | 363  | UGGU             | CUUC              | ge     | 1 |
| trf_3_3 | Bra024 | 7.  |    |   |    |      |      | GGGGAUGUAGCUCAAA | AACAUUUCGGUUACA   | Cleava |   |
| 47      | 638    | 3   | 5  | 1 | 20 | 206  | 225  | UGGU             | CCCC              | ge     | 1 |
| trf_3_3 | Bra009 | 14  |    |   |    |      |      | GGGGAUGUAGCUCAGA | AUCAUCUGGGCUUCGU  | Cleava |   |
| 48      | 876    | 3   | .9 | 1 | 20 | 18   | 37   | UGGU             | CCUC              | ge     | 1 |
| trf_3_3 | Bra016 | 10  |    |   |    |      |      | GGGGAUGUAGCUCAGA | AUCAUCUGAGCUUCGU  | Cleava |   |
| 48      | 141    | 3   | .4 | 1 | 20 | 3033 | 3052 | UGGU             | UCUC              | ge     | 1 |
| trf_3_3 | Bra036 | 20  |    |   |    |      |      | GGGGAUGUAGCUCAGA | ACUGGCUGAGCUACA   | Cleava |   |
| 48      | 771    | 3   | .2 | 1 | 20 | 5378 | 5397 | UGGU             | UCCU              | ge     | 1 |
| trf_3_3 | Bra018 | 8.  |    |   |    |      |      | GGGGAUGUAGCUCAGA | GCCACCUCAGCUACAUC | Cleava |   |
| 48      | 620    | 3   | 3  | 1 | 20 | 7    | 26   | UGGU             | CUC               | ge     | 1 |
| trf_3_3 | Bra000 | 15  |    |   |    |      |      | GGUUCUAUGGUCUAGC | GACCGCUGGACCAGAG  | Cleava |   |
| 49      | 719    | 3   | .3 | 1 | 20 | 1680 | 1699 | GGUU             | AACU              | ge     | 1 |
| trf_3_3 | Bra014 | 21  |    |   |    |      |      | GGUUCUAUGGUCUAGC | AGCUGCUAGACCUUGG  | Cleava |   |
| 49      | 489    | 3   | .1 | 1 | 20 | 168  | 187  | GGUU             | GACC              | ge     | 1 |
| trf_3_3 | Bra000 | 15  |    |   |    |      |      | GGUUCUAUGGUCUAGC | GACCGCUGGACCAGAG  | Cleava |   |
| 50      | 719    | 3   | .3 | 1 | 20 | 1680 | 1699 | GGUU             | AACU              | ge     | 1 |
| trf_3_3 | Bra014 | 21  |    |   |    |      |      | GGUUCUAUGGUCUAGC | AGCUGCUAGACCUUGG  | Cleava |   |
| 50      | 489    | 3   | .1 | 1 | 20 | 168  | 187  | GGUU             | GACC              | ge     | 1 |
| trf_3_3 | Bra036 | 20  |    |   |    |      |      | GGGGAUGUAGCUCAGA | CUCGACUGGCUGAGCU  | Cleava |   |
| 51      | 771    | 3   | .2 | 1 | 24 | 5374 | 5397 | UGGUAGAG         | ACAUUCCU          | ge     | 1 |
| trf_3_3 | Bra009 | 14  |    |   |    |      |      | GGGGAUGUAGCUCAGA | CGUUAUCAUCUGGGCU  | Cleava |   |
| 51      | 876    | 3   | .9 | 1 | 24 | 14   | 37   | UGGUAGAG         | UCGUCCUC          | ge     | 1 |
| trf_3_3 | Bra016 | 10  |    |   |    |      |      | GGGGAUGUAGCUCAGA | CAUUAUCAUCUGAGCU  | Cleava |   |
| 51      | 141    | 3   | .4 | 1 | 24 | 3029 | 3052 | UGGUAGAG         | UCGUUCUC          | ge     | 1 |
| trf_3_3 | Bra018 | 8.  |    |   |    |      |      | GGGGAUGUAGCUCAGA | GCCACCUCAGCUACAUC | Cleava |   |
| 51      | 620    | 3   | 3  | 1 | 20 | 7    | 26   | UGGU             | CUC               | ge     | 1 |
| trf_3_3 | Bra007 | 14  |    |   |    |      |      | GCACCAGUGGUCUAGU | UUACUACUGGACCUUU  | Cleava |   |
| 52      | 154    | 2.5 | .1 | 1 | 21 | 510  | 530  | GGUAG            | GGUGC             | ge     | 1 |
| trf_3_3 | Bra003 | 16  |    |   |    |      |      | GGGAUUGUAGUUCAA  | ACCAGUUGAAUUACAA  | Cleava |   |
| 53      | 753    | 2.5 | .2 | 1 | 20 | 284  | 303  | UCGGU            | UCCU              | ge     | 1 |
| trf_3_3 | Bra003 | 16  |    |   |    |      |      | GGGAUUGUAGUUCAA  | AACCAGUUGAAUUACA  | Cleava |   |
| 54      | 753    | 2.5 | .2 | 1 | 21 | 283  | 303  | UUGGAU           | AUCCU             | ge     | 1 |

|         |        |     |    |   |    |     |     |               |                  |          |   |
|---------|--------|-----|----|---|----|-----|-----|---------------|------------------|----------|---|
| trf_3_3 | Bra003 | 16  |    |   |    |     |     | GGGAUUGUAGUUC | ACCAGUUGAAUUACA  | Cleavage |   |
| 55      | 753    | 1.5 | .2 | 1 | 20 | 284 | 303 | UUGGU         | UCCU             | ge       | 1 |
| trf_3_3 | Bra013 | 19  |    |   |    |     |     | GGGAUUGUAGUUC | ACUAAUUGAACUAAGA | Cleavage |   |
| 55      | 336    | 3   | .5 | 1 | 20 | 267 | 286 | UUGGU         | UCUC             | ge       | 1 |
| trf_3_3 | Bra021 | 23  |    |   |    |     |     | GGGAUUGUAGUUC | ACCAACUGAACUGCAA | Cleavage |   |
| 55      | 314    | 3   | .2 | 1 | 20 | 234 | 253 | UUGGU         | UCUG             | ge       | 1 |
| trf_3_3 | Bra003 | 16  |    |   |    |     |     | GGGAUUGUAGUUC | ACCAGUUGAAUUACA  | Cleavage |   |
| 57      | 753    | 2.5 | .2 | 1 | 20 | 284 | 303 | UCGGU         | UCCU             | ge       | 1 |
| trf_3_3 | Bra003 | 16  |    |   |    |     |     | GGGAUUGUAGUUC | ACCAGUUGAAUUACA  | Cleavage |   |
| 58      | 753    | 2.5 | .2 | 1 | 20 | 284 | 303 | UUGGA         | UCCU             | ge       | 1 |
| trf_3_3 | Bra003 | 16  |    |   |    |     |     | GGGAUUGUAGUUC | ACCAGUUGAAUUACA  | Cleavage |   |
| 59      | 753    | 1.5 | .2 | 1 | 20 | 284 | 303 | UUGGU         | UCCU             | ge       | 1 |
| trf_3_3 | Bra013 | 19  |    |   |    |     |     | GGGAUUGUAGUUC | ACUAAUUGAACUAAGA | Cleavage |   |
| 59      | 336    | 3   | .5 | 1 | 20 | 267 | 286 | UUGGU         | UCUC             | ge       | 1 |
| trf_3_3 | Bra021 | 23  |    |   |    |     |     | GGGAUUGUAGUUC | ACCAACUGAACUGCAA | Cleavage |   |
| 59      | 314    | 3   | .2 | 1 | 20 | 234 | 253 | UUGGU         | UCUG             | ge       | 1 |
| trf_3_3 | Bra003 | 16  |    |   |    |     |     | GGGAUUGUAGUUC | ACCAGUUGAAUUACA  | Cleavage |   |
| 62      | 753    | 2.5 | .2 | 1 | 20 | 284 | 303 | UCGGU         | UCCU             | ge       | 1 |
| trf_3_3 | Bra003 | 16  |    |   |    |     |     | GGGAUUGUAGUUC | ACCAGUUGAAUUACA  | Cleavage |   |
| 63      | 753    | 1.5 | .2 | 1 | 20 | 284 | 303 | UUGGU         | UCCU             | ge       | 1 |
| trf_3_3 | Bra013 | 19  |    |   |    |     |     | GGGAUUGUAGUUC | ACUAAUUGAACUAAGA | Cleavage |   |
| 63      | 336    | 3   | .5 | 1 | 20 | 267 | 286 | UUGGU         | UCUC             | ge       | 1 |
| trf_3_3 | Bra021 | 23  |    |   |    |     |     | GGGAUUGUAGUUC | ACCAACUGAACUGCAA | Cleavage |   |
| 63      | 314    | 3   | .2 | 1 | 20 | 234 | 253 | UUGGU         | UCUG             | ge       | 1 |
| trf_3_3 | Bra003 | 16  |    |   |    |     |     | GGGAUUGUAGUUC | ACCAGUUGAAUUACA  | Cleavage |   |
| 64      | 753    | 2.5 | .2 | 1 | 20 | 284 | 303 | UCGGU         | UCCU             | ge       | 1 |
| trf_3_3 | Bra003 | 16  |    |   |    |     |     | GGGAUUGUAGUUC | ACCAGUUGAAUUACA  | Cleavage |   |
| 65      | 753    | 1.5 | .2 | 1 | 20 | 284 | 303 | UUGGU         | UCCU             | ge       | 1 |
| trf_3_3 | Bra013 | 19  |    |   |    |     |     | GGGAUUGUAGUUC | ACUAAUUGAACUAAGA | Cleavage |   |
| 65      | 336    | 3   | .5 | 1 | 20 | 267 | 286 | UUGGU         | UCUC             | ge       | 1 |
| trf_3_3 | Bra021 | 23  |    |   |    |     |     | GGGAUUGUAGUUC | ACCAACUGAACUGCAA | Cleavage |   |
| 65      | 314    | 3   | .2 | 1 | 20 | 234 | 253 | UUGGU         | UCUG             | ge       | 1 |
| trf_3_3 | Bra003 | 16  |    |   |    |     |     | GGGAUUGUAGUUC | ACCAGUUGAAUUACA  | Cleavage |   |
| 66      | 753    | 1.5 | .2 | 1 | 20 | 284 | 303 | UUGGU         | UCCU             | ge       | 1 |

|         |        |     |    |   |    |      |      |                  |                  |          |   |
|---------|--------|-----|----|---|----|------|------|------------------|------------------|----------|---|
| trf_3_3 | Bra013 | 19  |    |   |    |      |      | GGGAUUGUAGUUC    | ACUAAUUGAACUAAGA | Cleavage |   |
| 66      | 336    | 3   | .5 | 1 | 20 | 267  | 286  | UUGGU            | UCUC             | ge       | 1 |
| trf_3_3 | Bra021 | 23  |    |   |    |      |      | GGGAUUGUAGUUC    | ACCAACUGAACUGCAA | Cleavage |   |
| 66      | 314    | 3   | .2 | 1 | 20 | 234  | 253  | UUGGU            | UCUG             | ge       | 1 |
| trf_3_3 | Bra003 | 16  |    |   |    |      |      | GGGAUUGUAGUUC    | GAACCAGUUGAAUUAC | Cleavage |   |
| 67      | 753    | 2.5 | .2 | 1 | 22 | 282  | 303  | UCGGUCC          | AAUCCU           | ge       | 1 |
| trf_3_3 | Bra003 | 16  |    |   |    |      |      | GGGAUUGUAGUUC    | ACCAGUUGAAUUACAA | Cleavage |   |
| 68      | 753    | 2.5 | .2 | 1 | 20 | 284  | 303  | UCGGU            | UCCU             | ge       | 1 |
| trf_3_3 | Bra003 | 16  |    |   |    |      |      | GGGAUUGUAGUUC    | ACCAGUUGAAUUACAA | Cleavage |   |
| 69      | 753    | 2.5 | .2 | 1 | 20 | 284  | 303  | UCGGU            | UCCU             | ge       | 1 |
| trf_3_3 | Bra003 | 16  |    |   |    |      |      | GGGAUUGUAGUUC    | ACCAGUUGAAUUACAA | Cleavage |   |
| 73      | 753    | 2.5 | .2 | 1 | 20 | 284  | 303  | UCGGU            | UCCU             | ge       | 1 |
| trf_3_3 | Bra010 | 20  |    |   |    |      |      | GCUUCAGUAGCUCGGA | GUCAUCCGAGCUGAUG | Cleavage |   |
| 78      | 153    | 2.5 | .4 | 1 | 20 | 850  | 869  | UGGC             | AAGC             | ge       | 1 |
| trf_3_3 | Bra035 | 17  |    |   |    |      |      | GCUUCAGUAGCUCGGA | GCUGUCUGAGUUACUG | Cleavage |   |
| 78      | 649    | 3   | .6 | 1 | 20 | 423  | 442  | UGGC             | AAGA             | ge       | 1 |
| trf_3_3 | Bra016 | 16  |    |   |    |      |      | GCUUCAGUAGCUCGGA | GCCAUCCAGGUUGCUG | Cleavage |   |
| 78      | 307    | 2.5 | .1 | 1 | 20 | 1153 | 1172 | UGGC             | AAGC             | ge       | 1 |
| trf_3_3 | Bra029 | 21  |    |   |    |      |      | GCUUCAGUAGCUCGGA | ACUAACCGGGCUACUG | Cleavage |   |
| 78      | 313    | 3   | .3 | 1 | 20 | 262  | 281  | UGGC             | AAGC             | ge       | 1 |
| trf_3_3 | Bra018 | 12  |    |   |    |      |      | GCUUCAGUAGCUCGGA | GGCAUCUGAGCUACUA | Cleavage |   |
| 78      | 588    | 3   | .1 | 1 | 20 | 897  | 916  | UGGC             | AAGC             | ge       | 1 |
| trf_3_3 | Bra032 | 23  |    |   |    |      |      | GCUUCAGUAGCUCGGA | GAUGUUCGAGCUGCUG | Cleavage |   |
| 78      | 316    | 3   | .9 | 1 | 20 | 880  | 899  | UGGC             | AAGC             | ge       | 1 |
| trf_3_3 | Bra008 | 20  |    |   |    |      |      | GCUUCAGUAGCUCGGA | GUCAUCGCAGCUGCUG | Cleavage |   |
| 78      | 784    | 3   | .8 | 1 | 20 | 1057 | 1076 | UGGC             | AAGC             | ge       | 1 |
| trf_3_3 | Bra013 | 22  |    |   |    |      |      | UCCGUUGUAGUCUAGC | CAUCAUCAGCUUGGCU | Cleavage |   |
| 86      | 528    | 3   | .0 | 1 | 24 | 196  | 219  | UGGUCAGG         | AUAACGGG         | ge       | 1 |
| trf_3_3 | Bra013 | 22  |    |   |    |      |      | UCCGUUGUAGUCUAGC | AUCAGCUUGGCUAUAA | Cleavage |   |
| 87      | 528    | 3   | .0 | 1 | 20 | 200  | 219  | UGGU             | CGGG             | ge       | 1 |
| trf_3_3 | Bra000 | 15  |    |   |    |      |      | GGUUCUAUGGUCUAGC | GACCGCUGGACCAGAG | Cleavage |   |
| 88      | 719    | 3   | .3 | 1 | 20 | 1680 | 1699 | GGUU             | AACU             | ge       | 1 |
| trf_3_3 | Bra014 | 21  |    |   |    |      |      | GGUUCUAUGGUCUAGC | AGCUGCUAGACCUUGG | Cleavage |   |
| 88      | 489    | 3   | .1 | 1 | 20 | 168  | 187  | GGUU             | GACC             | ge       | 1 |

|         |        |    |    |   |    |     |      |                  |                   |        |   |
|---------|--------|----|----|---|----|-----|------|------------------|-------------------|--------|---|
| trf_3_4 | Bra013 | 16 |    |   |    |     |      | UCCGUUGUCGUCCAGC | UAUGAUAAACCGAUGGA | Cleava |   |
| 08      | 584    | 3  | .4 | 1 | 26 | 885 | 910  | GGUUAGGAUA       | UGUCAAUUGGA       | ge     | 1 |
| trf_3_4 | Bra000 | 11 |    |   |    |     |      | UCCGUUGUCGUCCAGC | UAACCGGAGGACGAUA  | Cleava |   |
| 08      | 529    | 3  | .2 | 1 | 21 | 984 | 1004 | GGUUA            | AUGGA             | ge     | 1 |
| trf_3_4 | Bra013 | 16 |    |   |    |     |      | UCCGUUGUCGUCCAGC | AUGAUAAACCGAUGGAU | Cleava |   |
| 09      | 584    | 3  | .4 | 1 | 25 | 886 | 910  | GGUUAGGAU        | GUCAAUGGA         | ge     | 1 |
| trf_3_4 | Bra000 | 11 |    |   |    |     |      | UCCGUUGUCGUCCAGC | UAACCGGAGGACGAUA  | Cleava |   |
| 09      | 529    | 3  | .2 | 1 | 21 | 984 | 1004 | GGUUA            | AUGGA             | ge     | 1 |
| trf_3_4 | Bra013 | 16 |    |   |    |     |      | UCCGUUGUCGUCCAGC | UAACCGAUGGAUGUCA  | Cleava |   |
| 12      | 584    | 3  | .4 | 1 | 21 | 890 | 910  | GGUUA            | AUGGA             | ge     | 1 |
| trf_3_4 | Bra000 | 11 |    |   |    |     |      | UCCGUUGUCGUCCAGC | UAACCGGAGGACGAUA  | Cleava |   |
| 12      | 529    | 3  | .2 | 1 | 21 | 984 | 1004 | GGUUA            | AUGGA             | ge     | 1 |
| trf_3_4 | Bra013 | 16 |    |   |    |     |      | UCCGUUGUCGUCCAGC | UAUGAUAAACCGAUGGA | Cleava |   |
| 13      | 584    | 3  | .4 | 1 | 26 | 885 | 910  | GGUUAGGAUA       | UGUCAAUUGGA       | ge     | 1 |
| trf_3_4 | Bra000 | 11 |    |   |    |     |      | UCCGUUGUCGUCCAGC | UAACCGGAGGACGAUA  | Cleava |   |
| 13      | 529    | 3  | .2 | 1 | 21 | 984 | 1004 | GGUUA            | AUGGA             | ge     | 1 |
| trf_3_4 | Bra013 | 16 |    |   |    |     |      | UCCGUUGUCGUCCAGC | UAACCGAUGGAUGUCA  | Cleava |   |
| 14      | 584    | 3  | .4 | 1 | 21 | 890 | 910  | GGUUA            | AUGGA             | ge     | 1 |
| trf_3_4 | Bra000 | 11 |    |   |    |     |      | UCCGUUGUCGUCCAGC | UAACCGGAGGACGAUA  | Cleava |   |
| 14      | 529    | 3  | .2 | 1 | 21 | 984 | 1004 | GGUUA            | AUGGA             | ge     | 1 |
| trf_3_4 | Bra013 | 16 |    |   |    |     |      | UCCGUUGUCGUCCAGC | AACCGAUGGAUGUCA   | Cleava |   |
| 15      | 584    | 3  | .4 | 1 | 20 | 891 | 910  | GGUU             | UGGA              | ge     | 1 |
| trf_3_4 | Bra000 | 11 |    |   |    |     |      | UCCGUUGUCGUCCAGC | AACCGGAGGACGAUAA  | Cleava |   |
| 15      | 529    | 3  | .2 | 1 | 20 | 985 | 1004 | GGUU             | UGGA              | ge     | 1 |
| trf_3_4 | Bra016 | 20 |    |   |    |     |      | UCCGUCGUAGUCUAGC | CUGAAGAAGCUAGGCU  | Cleava |   |
| 20      | 601    | 3  | .8 | 1 | 24 | 415 | 438  | UGGUUAGG         | GCGACGGA          | ge     | 1 |
| trf_3_4 | Bra016 | 20 |    |   |    |     |      | UCCGUCGUAGUCUAGC | CUGAAGAAGCUAGGCU  | Cleava |   |
| 21      | 601    | 3  | .8 | 1 | 24 | 415 | 438  | UGGUUAGG         | GCGACGGA          | ge     | 1 |
| trf_3_4 | Bra016 | 20 |    |   |    |     |      | UCCGUCGUAGUCUAGC | AAGAAGCUAGGCU     | Cleava |   |
| 22      | 601    | 3  | .8 | 1 | 21 | 418 | 438  | UGGUU            | ACGGA             | ge     | 1 |
| trf_3_4 | Bra016 | 20 |    |   |    |     |      | UCCGUCGUAGUCUAGC | CUGAAGAAGCUAGGCU  | Cleava |   |
| 23      | 601    | 3  | .8 | 1 | 24 | 415 | 438  | UGGUUAGG         | GCGACGGA          | ge     | 1 |
| trf_3_4 | Bra016 | 20 |    |   |    |     |      | UCCGUCGUAGUCUAGC | CUGAAGAAGCUAGGCU  | Cleava |   |
| 25      | 601    | 3  | .8 | 1 | 24 | 415 | 438  | UGGUUAGG         | GCGACGGA          | ge     | 1 |

|         |        |     |    |   |    |      |      |                  |                  |        |   |
|---------|--------|-----|----|---|----|------|------|------------------|------------------|--------|---|
| trf_3_4 | Bra020 | 12  |    |   |    |      |      | GGGGAUGUAGCUCAAA | GCCAUUGGAGCUAUAU | Cleava |   |
| 26      | 755    | 3   | .6 | 1 | 20 | 454  | 473  | UGGU             | UCUC             | ge     | 1 |
| trf_3_4 | Bra025 | 17  |    |   |    |      |      | GGGGAUGUAGCUCAAA | ACAAUUUGAGCUUCAU | Cleava |   |
| 26      | 904    | 3   | .2 | 1 | 20 | 344  | 363  | UGGU             | CUUC             | ge     | 1 |
| trf_3_4 | Bra024 | 7.  |    |   |    |      |      | GGGGAUGUAGCUCAAA | AACAUUUCGGUUACAU | Cleava |   |
| 26      | 638    | 3   | 5  | 1 | 20 | 206  | 225  | UGGU             | CCCC             | ge     | 1 |
| trf_3_4 | Bra016 | 20  |    |   |    |      |      | UCCGUCGUAGUCUAGC | CUGAAGAAGCUAGGCU | Cleava |   |
| 27      | 601    | 3   | .8 | 1 | 24 | 415  | 438  | UGGUUAGG         | GCGACGGA         | ge     | 1 |
| trf_3_4 | Bra016 | 20  |    |   |    |      |      | UCCGUCGUAGUCUAGC | AAGAAGCUAGGCUGCG | Cleava |   |
| 29      | 601    | 3   | .8 | 1 | 21 | 418  | 438  | UGGUU            | ACGGA            | ge     | 1 |
| trf_3_4 | Bra016 | 20  |    |   |    |      |      | UCCGUCGUAGUCUAGC | CUGAAGAAGCUAGGCU | Cleava |   |
| 30      | 601    | 3   | .8 | 1 | 24 | 415  | 438  | UGGUUAGG         | GCGACGGA         | ge     | 1 |
| trf_3_4 | Bra016 | 20  |    |   |    |      |      | UCCGUCGUAGUCUAGC | CUGAAGAAGCUAGGCU | Cleava |   |
| 31      | 601    | 3   | .8 | 1 | 24 | 415  | 438  | UGGUUAGG         | GCGACGGA         | ge     | 1 |
| trf_3_4 | Bra016 | 20  |    |   |    |      |      | UCCGUCGUAGUCUAGC | AAGAAGCUAGGCUGCG | Cleava |   |
| 33      | 601    | 3   | .8 | 1 | 21 | 418  | 438  | UGGUU            | ACGGA            | ge     | 1 |
| trf_3_4 | Bra007 | 14  |    |   |    |      |      | GCACCAGUGGUCUAGU | UUACUACUGGACCUUU | Cleava |   |
| 48      | 154    | 2.5 | .1 | 1 | 21 | 510  | 530  | GGUAG            | GGUGC            | ge     | 1 |
| trf_3_4 | Bra013 | 22  |    |   |    |      |      | UCCGUUGUAGUCUAGC | CAUCAUCAGCUUGGCU | Cleava |   |
| 64      | 528    | 3   | .0 | 1 | 24 | 196  | 219  | UGGUCAGG         | AUAACGGG         | ge     | 1 |
| trf_3_4 | Bra020 | 12  |    |   |    |      |      | GGGGAUGUAGCUCAAA | GCCAUUGGAGCUAUAU | Cleava |   |
| 81      | 755    | 3   | .6 | 1 | 20 | 454  | 473  | UGGU             | UCUC             | ge     | 1 |
| trf_3_4 | Bra025 | 17  |    |   |    |      |      | GGGGAUGUAGCUCAAA | ACAAUUUGAGCUUCAU | Cleava |   |
| 81      | 904    | 3   | .2 | 1 | 20 | 344  | 363  | UGGU             | CUUC             | ge     | 1 |
| trf_3_4 | Bra024 | 7.  |    |   |    |      |      | GGGGAUGUAGCUCAAA | AACAUUUCGGUUACAU | Cleava |   |
| 81      | 638    | 3   | 5  | 1 | 20 | 206  | 225  | UGGU             | CCCC             | ge     | 1 |
|         | Bra033 | 21  |    |   |    |      |      | GGGGAUGUAGCUCAAA | ACCCUUUGGGUAACAU | Transl |   |
| trf_3_1 | 370    | 3   | .6 | 1 | 20 | 4750 | 4769 | UGGU             | CCCC             | ation  | 1 |
|         | Bra037 | 22  |    |   |    |      |      | UCCGUUAUCGUCCAGC | GUUGAAACCGCUGUCU | Transl |   |
| trf_3_3 | 748    | 2.5 | .8 | 1 | 25 | 561  | 585  | GGUUAGGAU        | GAUAACGGA        | ation  | 1 |
|         | Bra037 | 22  |    |   |    |      |      | UCCGUUAUCGUCCAGC | GUUGAAACCGCUGUCU | Transl |   |
| trf_3_4 | 748    | 2.5 | .8 | 1 | 25 | 561  | 585  | GGUUAGGAU        | GAUAACGGA        | ation  | 1 |
|         | Bra037 | 22  |    |   |    |      |      | UCCGUUAUCGUCCAGC | AACCGCUGUCUGAUAA | Transl |   |
| trf_3_5 | 748    | 2.5 | .8 | 1 | 20 | 566  | 585  | GGUU             | CGGA             | ation  | 1 |



|         |        |     |    |   |    |      |      |                  |                   |        |   |
|---------|--------|-----|----|---|----|------|------|------------------|-------------------|--------|---|
| trf_3_6 | Bra037 | 22  |    |   |    |      |      | UCCGUUAUCGUCCAGC | AACCGCUGUCUGAUAA  | Transl |   |
|         | 748    | 2.5 | .8 | 1 | 20 | 566  | 585  | GGUU             | CGGA              | ation  | 1 |
| trf_3_7 | Bra037 | 22  |    |   |    |      |      | UCCGUUAUCGUCCAGC | AACCGCUGUCUGAUAA  | Transl |   |
|         | 748    | 2.5 | .8 | 1 | 20 | 566  | 585  | GGUU             | CGGA              | ation  | 1 |
| trf_3_1 | Bra037 | 22  |    |   |    |      |      | UCCGUUAUCGUCCAGC | GUUGAAACCGCUGUCU  | Transl |   |
| 1       | 748    | 2.5 | .8 | 1 | 25 | 561  | 585  | GGUUAGGAU        | GAUAACGGA         | ation  | 1 |
| trf_3_1 | Bra037 | 22  |    |   |    |      |      | UCCGUUAUCGUCCAGC | AACCGCUGUCUGAUAA  | Transl |   |
| 3       | 748    | 2.5 | .8 | 1 | 20 | 566  | 585  | GGUU             | CGGA              | ation  | 1 |
| trf_3_1 | Bra037 | 14  |    |   |    |      |      | UCCGUUGUAGUCUAGC | UGACUGGUUAGGCCAC  | Transl |   |
| 5       | 499    | 3   | .7 | 1 | 22 | 174  | 195  | UGGUUA           | AACGGA            | ation  | 1 |
| trf_3_2 | Bra038 | 17  |    |   |    |      |      | GGGUCCAUAGCUCAGU | UGUUUUUAUCACUCAGA | Transl |   |
| 4       | 641    | 3   | .8 | 1 | 25 | 1139 | 1163 | GGUAGAGCA        | UAUGGACUC         | ation  | 1 |
| trf_3_2 | Bra003 | 22  |    |   |    |      |      | GGGUCCAUAGCUCAGU | CUUCCACUGAUCUGUG  | Transl |   |
| 4       | 794    | 3   | .2 | 1 | 21 | 404  | 424  | GGUAG            | GAUCC             | ation  | 1 |
| trf_3_5 | Bra038 | 17  |    |   |    |      |      | GGGUCCAUAGCUCAGU | UGUUUUUAUCACUCAGA | Transl |   |
| 6       | 641    | 3   | .8 | 1 | 25 | 1139 | 1163 | GGUAGAGCA        | UAUGGACUC         | ation  | 1 |
| trf_3_5 | Bra003 | 22  |    |   |    |      |      | GGGUCCAUAGCUCAGU | CUUCCACUGAUCUGUG  | Transl |   |
| 6       | 794    | 3   | .2 | 1 | 21 | 404  | 424  | GGUAG            | GAUCC             | ation  | 1 |
| trf_3_8 | Bra020 | 15  |    |   |    |      |      | UCCGUUGUCGUCCAGC | CCAACUGCUGGAAGAC  | Transl |   |
| 3       | 153    | 2.5 | .4 | 1 | 22 | 1953 | 1974 | GGUUAG           | AAUGGG            | ation  | 1 |
| trf_3_8 | Bra012 | 18  |    |   |    |      |      | UCCGUUGUCGUCCAGC | AAUCGCUGAACCACAAC | Transl |   |
| 3       | 143    | 2.5 | .5 | 1 | 20 | 392  | 411  | GGUU             | GGA               | ation  | 1 |
| trf_3_8 | Bra037 | 22  |    |   |    |      |      | UCCGUUGUCGUCCAGC | GUUGAAACCGCUGUCU  | Transl |   |
| 3       | 748    | 3   | .8 | 1 | 25 | 561  | 585  | GGUUAGGAU        | GAUAACGGA         | ation  | 1 |
| trf_3_8 | Bra020 | 15  |    |   |    |      |      | UCCGUUGUCGUCCAGC | CCAACUGCUGGAAGAC  | Transl |   |
| 4       | 153    | 2.5 | .4 | 1 | 22 | 1953 | 1974 | GGUUAG           | AAUGGG            | ation  | 1 |
| trf_3_8 | Bra012 | 18  |    |   |    |      |      | UCCGUUGUCGUCCAGC | AAUCGCUGAACCACAAC | Transl |   |
| 4       | 143    | 2.5 | .5 | 1 | 20 | 392  | 411  | GGUU             | GGA               | ation  | 1 |
| trf_3_8 | Bra037 | 22  |    |   |    |      |      | UCCGUUGUCGUCCAGC | GUUGAAACCGCUGUCU  | Transl |   |
| 4       | 748    | 3   | .8 | 1 | 25 | 561  | 585  | GGUUAGGAU        | GAUAACGGA         | ation  | 1 |
| trf_3_8 | Bra020 | 15  |    |   |    |      |      | UCCGUUGUCGUCCAGC | CCAACUGCUGGAAGAC  | Transl |   |
| 5       | 153    | 2.5 | .4 | 1 | 22 | 1953 | 1974 | GGUUAG           | AAUGGG            | ation  | 1 |
| trf_3_8 | Bra012 | 18  |    |   |    |      |      | UCCGUUGUCGUCCAGC | AAUCGCUGAACCACAAC | Transl |   |
| 5       | 143    | 2.5 | .5 | 1 | 20 | 392  | 411  | GGUU             | GGA               | ation  | 1 |

|         |        |     |    |   |    |      |      |                  |                   |        |   |
|---------|--------|-----|----|---|----|------|------|------------------|-------------------|--------|---|
| trf_3_8 | Bra037 | 22  |    |   |    |      |      | UCCGUUGUCGUCCAGC | AACCGCUGUCUGAUAA  | Transl |   |
| 5       | 748    | 3   | .8 | 1 | 20 | 566  | 585  | GGUU             | CGGA              | ation  | 1 |
| trf_3_8 | Bra020 | 15  |    |   |    |      |      | UCCGUUGUCGUCCAGC | CCAACUGCUGGAAGAC  | Transl |   |
| 6       | 153    | 2.5 | .4 | 1 | 22 | 1953 | 1974 | GGUUAG           | AAUGGG            | ation  | 1 |
| trf_3_8 | Bra012 | 18  |    |   |    |      |      | UCCGUUGUCGUCCAGC | AAUCGCUGAACCACAAC | Transl |   |
| 6       | 143    | 2.5 | .5 | 1 | 20 | 392  | 411  | GGUU             | GGA               | ation  | 1 |
| trf_3_8 | Bra037 | 22  |    |   |    |      |      | UCCGUUGUCGUCCAGC | GUUGAAACCGCUGUCU  | Transl |   |
| 6       | 748    | 3   | .8 | 1 | 25 | 561  | 585  | GGUUAGGAU        | GAUAACGGA         | ation  | 1 |
| trf_3_8 | Bra020 | 15  |    |   |    |      |      | UCCGUUGUCGUCCAGC | CCAACUGCUGGAAGAC  | Transl |   |
| 7       | 153    | 2.5 | .4 | 1 | 22 | 1953 | 1974 | GGUUAG           | AAUGGG            | ation  | 1 |
| trf_3_8 | Bra012 | 18  |    |   |    |      |      | UCCGUUGUCGUCCAGC | AAUCGCUGAACCACAAC | Transl |   |
| 7       | 143    | 2.5 | .5 | 1 | 20 | 392  | 411  | GGUU             | GGA               | ation  | 1 |
| trf_3_8 | Bra037 | 22  |    |   |    |      |      | UCCGUUGUCGUCCAGC | AACCGCUGUCUGAUAA  | Transl |   |
| 7       | 748    | 3   | .8 | 1 | 20 | 566  | 585  | GGUU             | CGGA              | ation  | 1 |
| trf_3_8 | Bra020 | 15  |    |   |    |      |      | UCCGUUGUCGUCCAGC | AACUGCUGGAAGACAA  | Transl |   |
| 9       | 153    | 2.5 | .4 | 1 | 20 | 1955 | 1974 | GGUU             | UGGG              | ation  | 1 |
| trf_3_8 | Bra012 | 18  |    |   |    |      |      | UCCGUUGUCGUCCAGC | AAUCGCUGAACCACAAC | Transl |   |
| 9       | 143    | 2.5 | .5 | 1 | 20 | 392  | 411  | GGUU             | GGA               | ation  | 1 |
| trf_3_8 | Bra037 | 22  |    |   |    |      |      | UCCGUUGUCGUCCAGC | AACCGCUGUCUGAUAA  | Transl |   |
| 9       | 748    | 3   | .8 | 1 | 20 | 566  | 585  | GGUU             | CGGA              | ation  | 1 |
| trf_3_1 | Bra033 | 21  |    |   |    |      |      | GGGGAUGUAGCUCAAA | ACCCUUUGGGUAACAU  | Transl |   |
| 27      | 370    | 3   | .6 | 1 | 20 | 4750 | 4769 | UGGU             | CCCC              | ation  | 1 |
| trf_3_1 | Bra009 | 17  |    |   |    |      |      | UGGAGUAUAGCCAAGU | UUACCACUUGGCCGUG  | Transl |   |
| 29      | 917    | 2.5 | .7 | 1 | 21 | 865  | 885  | GGUAA            | UUCCA             | ation  | 1 |
| trf_3_1 | Bra019 | 20  |    |   |    |      |      | UGGAGUAUAGCCAAGU | CAUUCUACUUGGAUGU  | Transl |   |
| 29      | 342    | 3   | .5 | 1 | 22 | 1829 | 1850 | GGUAAG           | ACUCCA            | ation  | 1 |
| trf_3_1 | Bra014 | 15  |    |   |    |      |      | UGGAGUAUAGCCAAGU | UACCGUUUGGGUUUAC  | Transl |   |
| 29      | 319    | 3   | .0 | 1 | 20 | 867  | 886  | GGUA             | UCCA              | ation  | 1 |
| trf_3_1 | Bra033 | 21  |    |   |    |      |      | GGGGAUGUAGCUCAAA | ACCCUUUGGGUAACAU  | Transl |   |
| 30      | 370    | 3   | .6 | 1 | 20 | 4750 | 4769 | UGGU             | CCCC              | ation  | 1 |
| trf_3_1 | Bra033 | 21  |    |   |    |      |      | GGGGAUGUAGCUCAAA | CUGGACCCUUUGGGUA  | Transl |   |
| 31      | 370    | 3   | .6 | 1 | 24 | 4746 | 4769 | UGGUAGAG         | ACAUCCCC          | ation  | 1 |
| trf_3_1 | Bra037 | 12  |    |   |    |      |      | GACGGUUUGGCCGAGU | UUGACUACUCGUCCAA  | Transl |   |
| 34      | 152    | 3   | .2 | 1 | 22 | 478  | 499  | GGUCUA           | ACCCUC            | ation  | 1 |

|         |        |     |    |   |    |      |      |                  |                   |        |   |
|---------|--------|-----|----|---|----|------|------|------------------|-------------------|--------|---|
| trf_3_1 | Bra018 | 7.  |    |   |    |      |      | GACGGUUUGGCCGAGU | CCCAAGACCACUCCUCG | Transl |   |
| 34      | 257    | 3   | 1  | 1 | 25 | 27   | 51   | GGUCUAAGG        | AAACCGUC          | ation  | 1 |
| trf_3_1 | Bra038 | 17  |    |   |    |      |      | GGGUCCAUAGCUCAGU | UGUUUUUAUCACUCAGA | Transl |   |
| 37      | 641    | 3   | .8 | 1 | 25 | 1139 | 1163 | GGUAGAGCA        | UAUGGACUC         | ation  | 1 |
| trf_3_1 | Bra003 | 22  |    |   |    |      |      | GGGUCCAUAGCUCAGU | CUUCCACUGAUCUGUG  | Transl |   |
| 37      | 794    | 3   | .2 | 1 | 21 | 404  | 424  | GGUAG            | GAUCC             | ation  | 1 |
| trf_3_1 | Bra036 | 13  |    |   |    |      |      | GUGGCUGUAGUUUAG  | CAACACUAAAAGUGCAG | Transl |   |
| 52      | 328    | 3   | .8 | 1 | 20 | 708  | 727  | UGGUG            | CUAC              | ation  | 1 |
| trf_3_1 | Bra003 | 7.  |    |   |    |      |      | GUGGCUGUAGUUUAG  | UACCAUUAA-        | Transl |   |
| 52      | 191    | 3   | 6  | 1 | 20 | 27   | 45   | UGGUG            | CUACAGCCAC        | ation  | 1 |
| trf_3_1 | Bra036 | 13  |    |   |    |      |      | GUGGCUGUAGUUUAG  | CAACACUAAAAGUGCAG | Transl |   |
| 53      | 328    | 3   | .8 | 1 | 20 | 708  | 727  | UGGUG            | CUAC              | ation  | 1 |
| trf_3_1 | Bra027 | 22  |    |   |    |      |      | GCCGACUUAGCUCAGU | UACCACAGGGCGAAGU  | Transl |   |
| 62      | 297    | 3   | .9 | 1 | 20 | 178  | 197  | GGUA             | UGGC              | ation  | 1 |
| trf_3_1 | Bra027 | 22  |    |   |    |      |      | GCCGACUUAGCUCAGU | UACCACAGGGCGAAGU  | Transl |   |
| 64      | 297    | 3   | .9 | 1 | 20 | 178  | 197  | GGUA             | UGGC              | ation  | 1 |
| trf_3_1 | Bra037 | 14  |    |   |    |      |      | UCCGUUGUAGUCUAGC | UGACUGGUUAGGCCAC  | Transl |   |
| 65      | 499    | 3   | .7 | 1 | 22 | 174  | 195  | UGGUCA           | AACGGA            | ation  | 1 |
| trf_3_2 | Bra037 | 22  |    |   |    |      |      | UCCGUUAUCGUCCAGC | GUUGAAACCGCUGUCU  | Transl |   |
| 11      | 748    | 2.5 | .8 | 1 | 25 | 561  | 585  | GGUUAGGAU        | GAUAACGGA         | ation  | 1 |
| trf_3_2 | Bra037 | 22  |    |   |    |      |      | UCCGUUAUCGUCCAGC | GUUGAAACCGCUGUCU  | Transl |   |
| 12      | 748    | 2.5 | .8 | 1 | 25 | 561  | 585  | GGUUAGGAU        | GAUAACGGA         | ation  | 1 |
| trf_3_2 | Bra037 | 22  |    |   |    |      |      | UCCGUUAUCGUCCAGC | AACCGCUGUCUGAUAA  | Transl |   |
| 14      | 748    | 2.5 | .8 | 1 | 20 | 566  | 585  | GGUU             | CGGA              | ation  | 1 |
| trf_3_2 | Bra037 | 22  |    |   |    |      |      | UCCGUUAUCGUCCAGC | AACCGCUGUCUGAUAA  | Transl |   |
| 15      | 748    | 2.5 | .8 | 1 | 20 | 566  | 585  | GGUU             | CGGA              | ation  | 1 |
| trf_3_2 | Bra037 | 22  |    |   |    |      |      | UCCGUUAUCGUCCAGC | AACCGCUGUCUGAUAA  | Transl |   |
| 16      | 748    | 2.5 | .8 | 1 | 20 | 566  | 585  | GGUU             | CGGA              | ation  | 1 |
| trf_3_2 | Bra037 | 22  |    |   |    |      |      | UCCGUUAUCGUCCAGC | AACCGCUGUCUGAUAA  | Transl |   |
| 18      | 748    | 2.5 | .8 | 1 | 20 | 566  | 585  | GGUU             | CGGA              | ation  | 1 |
| trf_3_2 | Bra037 | 22  |    |   |    |      |      | UCCGUUAUCGUCCAGC | AACCGCUGUCUGAUAA  | Transl |   |
| 20      | 748    | 2.5 | .8 | 1 | 20 | 566  | 585  | GGUU             | CGGA              | ation  | 1 |
| trf_3_2 | Bra037 | 22  |    |   |    |      |      | UCCGUUAUCGUCCAGC | GUUGAAACCGCUGUCU  | Transl |   |
| 21      | 748    | 2.5 | .8 | 1 | 25 | 561  | 585  | GGUUAGGAU        | GAUAACGGA         | ation  | 1 |

|         |        |     |    |   |    |      |      |                  |                   |        |   |
|---------|--------|-----|----|---|----|------|------|------------------|-------------------|--------|---|
| trf_3_2 | Bra038 | 17  |    |   |    |      |      | GGGUCCAUAGCUCAGU | UGUUUUUAUCACUCAGA | Transl |   |
| 42      | 641    | 3   | .8 | 1 | 25 | 1139 | 1163 | GGUAGAGCA        | UAUGGACUC         | ation  | 1 |
| trf_3_2 | Bra003 | 22  |    |   |    |      |      | GGGUCCAUAGCUCAGU | CUUCCACUGAUCUGUG  | Transl |   |
| 42      | 794    | 3   | .2 | 1 | 21 | 404  | 424  | GGUAG            | GAUCC             | ation  | 1 |
| trf_3_2 | Bra020 | 15  |    |   |    |      |      | UCCGUUGUCGUCCAGC | CCAACUGCUGGAAGAC  | Transl |   |
| 58      | 153    | 2.5 | .4 | 1 | 22 | 1953 | 1974 | GGUUAG           | AAUGGG            | ation  | 1 |
| trf_3_2 | Bra012 | 18  |    |   |    |      |      | UCCGUUGUCGUCCAGC | AAUCGCUGAACCACAAC | Transl |   |
| 58      | 143    | 2.5 | .5 | 1 | 20 | 392  | 411  | GGUU             | GGA               | ation  | 1 |
| trf_3_2 | Bra037 | 22  |    |   |    |      |      | UCCGUUGUCGUCCAGC | GUUGAAACCGCUGUCU  | Transl |   |
| 58      | 748    | 3   | .8 | 1 | 25 | 561  | 585  | GGUUAGGAU        | GAUAACGGA         | ation  | 1 |
| trf_3_2 | Bra020 | 15  |    |   |    |      |      | UCCGUUGUCGUCCAGC | AACUGCUGGAAGACAA  | Transl |   |
| 59      | 153    | 2.5 | .4 | 1 | 20 | 1955 | 1974 | GGUU             | UGGG              | ation  | 1 |
| trf_3_2 | Bra012 | 18  |    |   |    |      |      | UCCGUUGUCGUCCAGC | AAUCGCUGAACCACAAC | Transl |   |
| 59      | 143    | 2.5 | .5 | 1 | 20 | 392  | 411  | GGUU             | GGA               | ation  | 1 |
| trf_3_2 | Bra037 | 22  |    |   |    |      |      | UCCGUUGUCGUCCAGC | AACCGCUGUCUGAUAA  | Transl |   |
| 59      | 748    | 3   | .8 | 1 | 20 | 566  | 585  | GGUU             | CGGA              | ation  | 1 |
| trf_3_2 | Bra020 | 15  |    |   |    |      |      | UCCGUUGUCGUCCAGC | CCAACUGCUGGAAGAC  | Transl |   |
| 60      | 153    | 2.5 | .4 | 1 | 22 | 1953 | 1974 | GGUUAG           | AAUGGG            | ation  | 1 |
| trf_3_2 | Bra012 | 18  |    |   |    |      |      | UCCGUUGUCGUCCAGC | AAUCGCUGAACCACAAC | Transl |   |
| 60      | 143    | 2.5 | .5 | 1 | 20 | 392  | 411  | GGUU             | GGA               | ation  | 1 |
| trf_3_2 | Bra037 | 22  |    |   |    |      |      | UCCGUUGUCGUCCAGC | AACCGCUGUCUGAUAA  | Transl |   |
| 60      | 748    | 3   | .8 | 1 | 20 | 566  | 585  | GGUU             | CGGA              | ation  | 1 |
| trf_3_2 | Bra020 | 15  |    |   |    |      |      | UCCGUUGUCGUCCAGC | CCAACUGCUGGAAGAC  | Transl |   |
| 61      | 153    | 2.5 | .4 | 1 | 22 | 1953 | 1974 | GGUUAG           | AAUGGG            | ation  | 1 |
| trf_3_2 | Bra012 | 18  |    |   |    |      |      | UCCGUUGUCGUCCAGC | AAUCGCUGAACCACAAC | Transl |   |
| 61      | 143    | 2.5 | .5 | 1 | 20 | 392  | 411  | GGUU             | GGA               | ation  | 1 |
| trf_3_2 | Bra037 | 22  |    |   |    |      |      | UCCGUUGUCGUCCAGC | GUUGAAACCGCUGUCU  | Transl |   |
| 61      | 748    | 3   | .8 | 1 | 25 | 561  | 585  | GGUUAGGAU        | GAUAACGGA         | ation  | 1 |
| trf_3_2 | Bra020 | 15  |    |   |    |      |      | UCCGUUGUCGUCCAGC | CCAACUGCUGGAAGAC  | Transl |   |
| 63      | 153    | 2.5 | .4 | 1 | 22 | 1953 | 1974 | GGUUAG           | AAUGGG            | ation  | 1 |
| trf_3_2 | Bra012 | 18  |    |   |    |      |      | UCCGUUGUCGUCCAGC | AAUCGCUGAACCACAAC | Transl |   |
| 63      | 143    | 2.5 | .5 | 1 | 20 | 392  | 411  | GGUU             | GGA               | ation  | 1 |
| trf_3_2 | Bra037 | 22  |    |   |    |      |      | UCCGUUGUCGUCCAGC | GUUGAAACCGCUGUCU  | Transl |   |
| 63      | 748    | 3   | .8 | 1 | 25 | 561  | 585  | GGUUAGGAU        | GAUAACGGA         | ation  | 1 |

|         |        |     |    |   |    |      |      |                  |                   |        |   |
|---------|--------|-----|----|---|----|------|------|------------------|-------------------|--------|---|
| trf_3_2 | Bra020 | 15  |    |   |    |      |      | UCCGUUGUCGUCCAGC | CCAACUGCUGGAAGAC  | Transl |   |
| 64      | 153    | 2.5 | .4 | 1 | 22 | 1953 | 1974 | GGUUAG           | AAUGGG            | ation  | 1 |
| trf_3_2 | Bra012 | 18  |    |   |    |      |      | UCCGUUGUCGUCCAGC | AAUCGCUGAACCACAAC | Transl |   |
| 64      | 143    | 2.5 | .5 | 1 | 20 | 392  | 411  | GGUU             | GGA               | ation  | 1 |
| trf_3_2 | Bra037 | 22  |    |   |    |      |      | UCCGUUGUCGUCCAGC | AACCGCUGUCUGAUAA  | Transl |   |
| 64      | 748    | 3   | .8 | 1 | 20 | 566  | 585  | GGUU             | CGGA              | ation  | 1 |
| trf_3_2 | Bra020 | 15  |    |   |    |      |      | UCCGUUGUCGUCCAGC | CCAACUGCUGGAAGAC  | Transl |   |
| 67      | 153    | 2.5 | .4 | 1 | 22 | 1953 | 1974 | GGUUAG           | AAUGGG            | ation  | 1 |
| trf_3_2 | Bra012 | 18  |    |   |    |      |      | UCCGUUGUCGUCCAGC | AAUCGCUGAACCACAAC | Transl |   |
| 67      | 143    | 2.5 | .5 | 1 | 20 | 392  | 411  | GGUU             | GGA               | ation  | 1 |
| trf_3_2 | Bra037 | 22  |    |   |    |      |      | UCCGUUGUCGUCCAGC | AACCGCUGUCUGAUAA  | Transl |   |
| 67      | 748    | 3   | .8 | 1 | 20 | 566  | 585  | GGUU             | CGGA              | ation  | 1 |
| trf_3_2 | Bra023 | 9.  |    |   |    |      |      | GGUUCUAUGGUGUAG  | AACCAAUACAUGAUAG  | Transl |   |
| 69      | 904    | 3   | 9  | 1 | 20 | 1163 | 1182 | UGGUU            | AAUC              | ation  | 1 |
| trf_3_2 | Bra023 | 9.  |    |   |    |      |      | GGUUCUAUGGUGUAG  | AACCAAUACAUGAUAG  | Transl |   |
| 70      | 904    | 3   | 9  | 1 | 20 | 1163 | 1182 | UGGUU            | AAUC              | ation  | 1 |
| trf_3_2 | Bra023 | 9.  |    |   |    |      |      | GGUUCUAUGGUGUAG  | AACCAAUACAUGAUAG  | Transl |   |
| 71      | 904    | 3   | 9  | 1 | 20 | 1163 | 1182 | UGGUU            | AAUC              | ation  | 1 |
| trf_3_2 | Bra023 | 9.  |    |   |    |      |      | GGUUCUAUGGUGUAG  | AACCAAUACAUGAUAG  | Transl |   |
| 72      | 904    | 3   | 9  | 1 | 20 | 1163 | 1182 | UGGUU            | AAUC              | ation  | 1 |
| trf_3_2 | Bra023 | 9.  |    |   |    |      |      | GGUUCUAUGGUGUAG  | AACCAAUACAUGAUAG  | Transl |   |
| 74      | 904    | 3   | 9  | 1 | 20 | 1163 | 1182 | UGGUU            | AAUC              | ation  | 1 |
| trf_3_2 | Bra038 | 17  |    |   |    |      |      | GGGUCCAUAGCUCAGU | UGUUUUUAUCACUCAGA | Transl |   |
| 76      | 641    | 3   | .8 | 1 | 25 | 1139 | 1163 | GGUAGAGCA        | UAUGGACUC         | ation  | 1 |
| trf_3_2 | Bra003 | 22  |    |   |    |      |      | GGGUCCAUAGCUCAGU | CUUCCACUGAUCUGUG  | Transl |   |
| 76      | 794    | 3   | .2 | 1 | 21 | 404  | 424  | GGUAG            | GAUCC             | ation  | 1 |
| trf_3_2 | Bra038 | 17  |    |   |    |      |      | GGGUCCAUAGCUCAGU | UGUUUUUAUCACUCAGA | Transl |   |
| 77      | 641    | 3   | .8 | 1 | 25 | 1139 | 1163 | GGUAGAGCA        | UAUGGACUC         | ation  | 1 |
| trf_3_2 | Bra003 | 22  |    |   |    |      |      | GGGUCCAUAGCUCAGU | CUUCCACUGAUCUGUG  | Transl |   |
| 77      | 794    | 3   | .2 | 1 | 21 | 404  | 424  | GGUAG            | GAUCC             | ation  | 1 |
| trf_3_2 | Bra038 | 17  |    |   |    |      |      | GGGUCCAUAGCUCAGU | UGUUUUUAUCACUCAGA | Transl |   |
| 78      | 641    | 3   | .8 | 1 | 25 | 1139 | 1163 | GGUAGAGCA        | UAUGGACUC         | ation  | 1 |
| trf_3_2 | Bra003 | 22  |    |   |    |      |      | GGGUCCAUAGCUCAGU | CUUCCACUGAUCUGUG  | Transl |   |
| 78      | 794    | 3   | .2 | 1 | 21 | 404  | 424  | GGUAG            | GAUCC             | ation  | 1 |

|         |        |     |    |   |    |      |      |                  |                   |        |   |
|---------|--------|-----|----|---|----|------|------|------------------|-------------------|--------|---|
| trf_3_2 | Bra037 | 14  |    |   |    |      |      | UCCGUUGUAGUCUAGC | GACUGGUUAGGCCACA  | Transl |   |
| 80      | 499    | 3   | .7 | 1 | 21 | 175  | 195  | UGGUC            | ACGGA             | ation  | 1 |
| trf_3_2 | Bra023 | 9.  |    |   |    |      |      | GGUUCUAUGGUGUAG  | AACCAAUACAUGAUAG  | Transl |   |
| 82      | 904    | 3   | 9  | 1 | 20 | 1163 | 1182 | UGGUU            | AAUC              | ation  | 1 |
| trf_3_2 | Bra023 | 9.  |    |   |    |      |      | GGUUCUAUGGUGUAG  | AACCAAUACAUGAUAG  | Transl |   |
| 83      | 904    | 3   | 9  | 1 | 20 | 1163 | 1182 | UGGUU            | AAUC              | ation  | 1 |
| trf_3_2 | Bra023 | 9.  |    |   |    |      |      | GGUUCUAUGGUGUAG  | AACCAAUACAUGAUAG  | Transl |   |
| 84      | 904    | 3   | 9  | 1 | 20 | 1163 | 1182 | UGGUU            | AAUC              | ation  | 1 |
| trf_3_2 | Bra023 | 9.  |    |   |    |      |      | GGUUCUAUGGUGUAG  | AACCAAUACAUGAUAG  | Transl |   |
| 86      | 904    | 3   | 9  | 1 | 20 | 1163 | 1182 | UGGUU            | AAUC              | ation  | 1 |
| trf_3_2 | Bra023 | 9.  |    |   |    |      |      | GGUUCUAUGGUGUAG  | AACCAAUACAUGAUAG  | Transl |   |
| 87      | 904    | 3   | 9  | 1 | 20 | 1163 | 1182 | UGGUU            | AAUC              | ation  | 1 |
| trf_3_2 | Bra020 | 15  |    |   |    |      |      | UCCGUUGUCGUCCAGC | AACUGCUGGAAGACAA  | Transl |   |
| 88      | 153    | 2.5 | .4 | 1 | 20 | 1955 | 1974 | GGUU             | UGGG              | ation  | 1 |
| trf_3_2 | Bra012 | 18  |    |   |    |      |      | UCCGUUGUCGUCCAGC | AAUCGCUGAACCACAAC | Transl |   |
| 88      | 143    | 2.5 | .5 | 1 | 20 | 392  | 411  | GGUU             | GGA               | ation  | 1 |
| trf_3_2 | Bra037 | 22  |    |   |    |      |      | UCCGUUGUCGUCCAGC | AACCGCUGUCUGAUAA  | Transl |   |
| 88      | 748    | 3   | .8 | 1 | 20 | 566  | 585  | GGUU             | CGGA              | ation  | 1 |
| trf_3_2 | Bra020 | 15  |    |   |    |      |      | UCCGUUGUCGUCCAGC | CCAACUGCUGGAAGAC  | Transl |   |
| 89      | 153    | 2.5 | .4 | 1 | 22 | 1953 | 1974 | GGUUAG           | AAUGGG            | ation  | 1 |
| trf_3_2 | Bra012 | 18  |    |   |    |      |      | UCCGUUGUCGUCCAGC | AAUCGCUGAACCACAAC | Transl |   |
| 89      | 143    | 2.5 | .5 | 1 | 20 | 392  | 411  | GGUU             | GGA               | ation  | 1 |
| trf_3_2 | Bra037 | 22  |    |   |    |      |      | UCCGUUGUCGUCCAGC | GUUGAAACCGCUGUCU  | Transl |   |
| 89      | 748    | 3   | .8 | 1 | 25 | 561  | 585  | GGUUAGGAU        | GAUAACGGA         | ation  | 1 |
| trf_3_2 | Bra020 | 15  |    |   |    |      |      | UCCGUUGUCGUCCAGC | CCAACUGCUGGAAGAC  | Transl |   |
| 90      | 153    | 2.5 | .4 | 1 | 22 | 1953 | 1974 | GGUUAG           | AAUGGG            | ation  | 1 |
| trf_3_2 | Bra012 | 18  |    |   |    |      |      | UCCGUUGUCGUCCAGC | AAUCGCUGAACCACAAC | Transl |   |
| 90      | 143    | 2.5 | .5 | 1 | 20 | 392  | 411  | GGUU             | GGA               | ation  | 1 |
| trf_3_2 | Bra037 | 22  |    |   |    |      |      | UCCGUUGUCGUCCAGC | AACCGCUGUCUGAUAA  | Transl |   |
| 90      | 748    | 3   | .8 | 1 | 20 | 566  | 585  | GGUU             | CGGA              | ation  | 1 |
| trf_3_2 | Bra020 | 15  |    |   |    |      |      | UCCGUUGUCGUCCAGC | CCAACUGCUGGAAGAC  | Transl |   |
| 91      | 153    | 2.5 | .4 | 1 | 22 | 1953 | 1974 | GGUUAG           | AAUGGG            | ation  | 1 |
| trf_3_2 | Bra012 | 18  |    |   |    |      |      | UCCGUUGUCGUCCAGC | AAUCGCUGAACCACAAC | Transl |   |
| 91      | 143    | 2.5 | .5 | 1 | 20 | 392  | 411  | GGUU             | GGA               | ation  | 1 |

|         |        |     |    |   |    |      |      |                  |                   |        |   |
|---------|--------|-----|----|---|----|------|------|------------------|-------------------|--------|---|
| trf_3_2 | Bra037 | 22  |    |   |    |      |      | UCCGUUGUCGUCCAGC | GUUGAAACCGCUGUCU  | Transl |   |
| 91      | 748    | 3   | .8 | 1 | 25 | 561  | 585  | GGUUAGGAU        | GAUAACGGA         | ation  | 1 |
| trf_3_2 | Bra020 | 15  |    |   |    |      |      | UCCGUUGUCGUCCAGC | CCAACUGCUGGAAGAC  | Transl |   |
| 92      | 153    | 2.5 | .4 | 1 | 22 | 1953 | 1974 | GGUUAG           | AAUGGG            | ation  | 1 |
| trf_3_2 | Bra012 | 18  |    |   |    |      |      | UCCGUUGUCGUCCAGC | AAUCGCUGAACCACAAC | Transl |   |
| 92      | 143    | 2.5 | .5 | 1 | 20 | 392  | 411  | GGUU             | GGA               | ation  | 1 |
| trf_3_2 | Bra037 | 22  |    |   |    |      |      | UCCGUUGUCGUCCAGC | AACCGCUGUCUGAUAA  | Transl |   |
| 92      | 748    | 3   | .8 | 1 | 20 | 566  | 585  | GGUU             | CGGA              | ation  | 1 |
| trf_3_2 | Bra020 | 15  |    |   |    |      |      | UCCGUUGUCGUCCAGC | CCAACUGCUGGAAGAC  | Transl |   |
| 94      | 153    | 2.5 | .4 | 1 | 22 | 1953 | 1974 | GGUUAG           | AAUGGG            | ation  | 1 |
| trf_3_2 | Bra012 | 18  |    |   |    |      |      | UCCGUUGUCGUCCAGC | AAUCGCUGAACCACAAC | Transl |   |
| 94      | 143    | 2.5 | .5 | 1 | 20 | 392  | 411  | GGUU             | GGA               | ation  | 1 |
| trf_3_2 | Bra037 | 22  |    |   |    |      |      | UCCGUUGUCGUCCAGC | AACCGCUGUCUGAUAA  | Transl |   |
| 94      | 748    | 3   | .8 | 1 | 20 | 566  | 585  | GGUU             | CGGA              | ation  | 1 |
| trf_3_3 | Bra036 | 13  |    |   |    |      |      | GUGGCUGUAGUUUAG  | CAACACUAAAAGUGCAG | Transl |   |
| 03      | 328    | 3   | .8 | 1 | 20 | 708  | 727  | UGGUG            | CUAC              | ation  | 1 |
| trf_3_3 | Bra003 | 7.  |    |   |    |      |      | GUGGCUGUAGUUUAG  | UACCAUUAA-        | Transl |   |
| 03      | 191    | 3   | 6  | 1 | 20 | 27   | 45   | UGGUG            | CUACAGCCAC        | ation  | 1 |
| trf_3_3 | Bra037 | 14  |    |   |    |      |      | UCCGUUGUAGUCUAGC | UGACUGGUUAGGCCAC  | Transl |   |
| 08      | 499    | 3   | .7 | 1 | 22 | 174  | 195  | UGGUCA           | AACGGA            | ation  | 1 |
| trf_3_3 | Bra015 | 24  |    |   |    |      |      | AUCAGAGUGGCGCAGC | CGUUUCCACUGCACCA  | Transl |   |
| 11      | 824    | 3   | .0 | 1 | 23 | 916  | 938  | GGAAGCG          | CUCUGAC           | ation  | 1 |
| trf_3_3 | Bra033 | 18  |    |   |    |      |      | AUCAGAGUGGCGCAGC | UUACGUUGCACCACUU  | Transl |   |
| 11      | 352    | 3   | .3 | 1 | 20 | 590  | 609  | GGAA             | UGAU              | ation  | 1 |
| trf_3_3 | Bra015 | 24  |    |   |    |      |      | AUCAGAGUGGCGCAGC | CGUUUCCACUGCACCA  | Transl |   |
| 12      | 824    | 3   | .0 | 1 | 23 | 916  | 938  | GGAAGCG          | CUCUGAC           | ation  | 1 |
| trf_3_3 | Bra033 | 18  |    |   |    |      |      | AUCAGAGUGGCGCAGC | UUACGUUGCACCACUU  | Transl |   |
| 12      | 352    | 3   | .3 | 1 | 20 | 590  | 609  | GGAA             | UGAU              | ation  | 1 |
| trf_3_3 | Bra026 | 22  |    |   |    |      |      | GAUAGUUUGGCCGAGU | CACUACUCGGCGAGAC  | Transl |   |
| 14      | 956    | 3   | .2 | 1 | 20 | 116  | 135  | GGUC             | UAUC              | ation  | 1 |
| trf_3_3 | Bra026 | 22  |    |   |    |      |      | GAUAGUUUGGCCGAGU | CACUACUCGGCGAGAC  | Transl |   |
| 15      | 956    | 3   | .2 | 1 | 20 | 116  | 135  | GGUC             | UAUC              | ation  | 1 |
| trf_3_3 | Bra038 | 17  |    |   |    |      |      | GGGUCCAUAGCUCAGU | UGUUUUUAUCACUCAGA | Transl |   |
| 21      | 641    | 3   | .8 | 1 | 25 | 1139 | 1163 | GGUAGAGCA        | UAUGGACUC         | ation  | 1 |

|         |        |    |    |   |    |      |      |                  |                   |        |   |
|---------|--------|----|----|---|----|------|------|------------------|-------------------|--------|---|
| trf_3_3 | Bra003 | 22 |    |   |    |      |      | GGGUCCAUAGCUCAGU | CUUCCACUGAUCUGUG  | Transl |   |
| 21      | 794    | 3  | .2 | 1 | 21 | 404  | 424  | GGUAG            | GAUCC             | ation  | 1 |
| trf_3_3 | Bra029 | 18 |    |   |    |      |      | GUCUGGUUGGUGUAG  | UCCGACUGAUCCAACC  | Transl |   |
| 22      | 882    | 3  | .0 | 1 | 20 | 290  | 309  | UCGGA            | GGAC              | ation  | 1 |
| trf_3_3 | Bra027 | 22 |    |   |    |      |      | GCCGACUUAGCUCAGU | UACCACAGGGCGAAGU  | Transl |   |
| 35      | 297    | 3  | .9 | 1 | 20 | 178  | 197  | GGUA             | UGGC              | ation  | 1 |
| trf_3_3 | Bra038 | 17 |    |   |    |      |      | GGGUCCAUAGCUCAGU | UGUUUUUAUCACUCAGA | Transl |   |
| 36      | 641    | 3  | .8 | 1 | 25 | 1139 | 1163 | GGUAGAGCA        | UAUGGACUC         | ation  | 1 |
| trf_3_3 | Bra003 | 22 |    |   |    |      |      | GGGUCCAUAGCUCAGU | CUUCCACUGAUCUGUG  | Transl |   |
| 36      | 794    | 3  | .2 | 1 | 21 | 404  | 424  | GGUAG            | GAUCC             | ation  | 1 |
| trf_3_3 | Bra023 | 9. |    |   |    |      |      | GGUUCUAUGGUGUAG  | AACCAAUACAUGAUAG  | Transl |   |
| 41      | 904    | 3  | 9  | 1 | 20 | 1163 | 1182 | UGGUU            | AAUC              | ation  | 1 |
| trf_3_3 | Bra023 | 9. |    |   |    |      |      | GGUUCUAUGGUGUAG  | AACCAAUACAUGAUAG  | Transl |   |
| 42      | 904    | 3  | 9  | 1 | 20 | 1163 | 1182 | UGGUU            | AAUC              | ation  | 1 |
| trf_3_3 | Bra023 | 9. |    |   |    |      |      | GGUUCUAUGGUGUAG  | AACCAAUACAUGAUAG  | Transl |   |
| 44      | 904    | 3  | 9  | 1 | 20 | 1163 | 1182 | UGGUU            | AAUC              | ation  | 1 |
| trf_3_3 | Bra023 | 9. |    |   |    |      |      | GGUUCUAUGGUGUAG  | AACCAAUACAUGAUAG  | Transl |   |
| 45      | 904    | 3  | 9  | 1 | 20 | 1163 | 1182 | UGGUU            | AAUC              | ation  | 1 |
| trf_3_3 | Bra033 | 21 |    |   |    |      |      | GGGGAUGUAGCUCAAA | ACCCUUUGGGUAACAU  | Transl |   |
| 47      | 370    | 3  | .6 | 1 | 20 | 4750 | 4769 | UGGU             | CCCC              | ation  | 1 |
| trf_3_3 | Bra033 | 10 |    |   |    |      |      | GGGAUUGUAGUUCAA  | ACCGAUUGAUCAGCAA  | Transl |   |
| 53      | 536    | 3  | .5 | 1 | 20 | 426  | 445  | UCGGU            | UUCC              | ation  | 1 |
| trf_3_3 | Bra034 | 11 |    |   |    |      |      | GGGAUUGUAGUUCAA  | AUCCAAAUGAGCAGCA  | Transl |   |
| 54      | 753    | 3  | .6 | 1 | 21 | 442  | 462  | UUGGAU           | AUCCC             | ation  | 1 |
| trf_3_3 | Bra003 | 13 |    |   |    |      |      | GGGAUUGUAGUUCAA  | AUCCAGUUAAUCUACA  | Transl |   |
| 54      | 597    | 3  | .1 | 1 | 21 | 1507 | 1527 | UUGGAU           | AUUCC             | ation  | 1 |
| trf_3_3 | Bra023 | 12 |    |   |    |      |      | GGGAUUGUAGUUCAA  | UCCAAGUGAACAUCAA  | Transl |   |
| 54      | 172    | 3  | .4 | 1 | 20 | 614  | 633  | UUGGA            | UCCC              | ation  | 1 |
| trf_3_3 | Bra033 | 10 |    |   |    |      |      | GGGAUUGUAGUUCAA  | ACCGAUUGAUCAGCAA  | Transl |   |
| 57      | 536    | 3  | .5 | 1 | 20 | 426  | 445  | UCGGU            | UUCC              | ation  | 1 |
| trf_3_3 | Bra034 | 11 |    |   |    |      |      | GGGAUUGUAGUUCAA  | UCCAAAUGAGCAGCAA  | Transl |   |
| 58      | 753    | 3  | .6 | 1 | 20 | 443  | 462  | UUGGA            | UCCC              | ation  | 1 |
| trf_3_3 | Bra003 | 13 |    |   |    |      |      | GGGAUUGUAGUUCAA  | UCCAGUUAAUCUACAA  | Transl |   |
| 58      | 597    | 3  | .1 | 1 | 20 | 1508 | 1527 | UUGGA            | UUCC              | ation  | 1 |



|         |        |    |    |   |    |      |      |                  |                   |        |   |
|---------|--------|----|----|---|----|------|------|------------------|-------------------|--------|---|
| trf_3_3 | Bra023 | 12 |    |   |    |      |      | GGGAUUGUAGUUCAA  | UCCAAGUGAACAUCAA  | Transl |   |
| 58      | 172    | 3  | .4 | 1 | 20 | 614  | 633  | UUGGA            | UCCC              | ation  | 1 |
| trf_3_3 | Bra033 | 10 |    |   |    |      |      | GGGAUUGUAGUUCAA  | ACCGAUUGAUCAGCAA  | Transl |   |
| 62      | 536    | 3  | .5 | 1 | 20 | 426  | 445  | UCGGU            | UUCC              | ation  | 1 |
| trf_3_3 | Bra033 | 10 |    |   |    |      |      | GGGAUUGUAGUUCAA  | ACCGAUUGAUCAGCAA  | Transl |   |
| 64      | 536    | 3  | .5 | 1 | 20 | 426  | 445  | UCGGU            | UUCC              | ation  | 1 |
| trf_3_3 | Bra033 | 10 |    |   |    |      |      | GGGAUUGUAGUUCAA  | ACCGAUUGAUCAGCAA  | Transl |   |
| 67      | 536    | 3  | .5 | 1 | 20 | 426  | 445  | UCGGU            | UUCC              | ation  | 1 |
| trf_3_3 | Bra033 | 10 |    |   |    |      |      | GGGAUUGUAGUUCAA  | ACCGAUUGAUCAGCAA  | Transl |   |
| 68      | 536    | 3  | .5 | 1 | 20 | 426  | 445  | UCGGU            | UUCC              | ation  | 1 |
| trf_3_3 | Bra033 | 10 |    |   |    |      |      | GGGAUUGUAGUUCAA  | ACCGAUUGAUCAGCAA  | Transl |   |
| 69      | 536    | 3  | .5 | 1 | 20 | 426  | 445  | UCGGU            | UUCC              | ation  | 1 |
| trf_3_3 | Bra033 | 10 |    |   |    |      |      | GGGAUUGUAGUUCAA  | ACCGAUUGAUCAGCAA  | Transl |   |
| 73      | 536    | 3  | .5 | 1 | 20 | 426  | 445  | UCGGU            | UUCC              | ation  | 1 |
| trf_3_3 | Bra023 | 16 |    |   |    |      |      | GCUUCAGUAGCUCGGA | ACCAACCGAGCAACUGA | Transl |   |
| 78      | 806    | 3  | .3 | 1 | 20 | 781  | 800  | UGGC             | AGC               | ation  | 1 |
| trf_3_3 | Bra023 | 9. |    |   |    |      |      | GGUUCUAUGGUGUAG  | AACCAAUACAUGAUAG  | Transl |   |
| 80      | 904    | 3  | 9  | 1 | 20 | 1163 | 1182 | UGGUU            | AAUC              | ation  | 1 |
| trf_3_3 | Bra023 | 9. |    |   |    |      |      | GGUUCUAUGGUGUAG  | AACCAAUACAUGAUAG  | Transl |   |
| 81      | 904    | 3  | 9  | 1 | 20 | 1163 | 1182 | UGGUU            | AAUC              | ation  | 1 |
| trf_3_3 | Bra023 | 9. |    |   |    |      |      | GGUUCUAUGGUGUAG  | AACCAAUACAUGAUAG  | Transl |   |
| 82      | 904    | 3  | 9  | 1 | 20 | 1163 | 1182 | UGGUU            | AAUC              | ation  | 1 |
| trf_3_3 | Bra023 | 9. |    |   |    |      |      | GGUUCUAUGGUGUAG  | AACCAAUACAUGAUAG  | Transl |   |
| 83      | 904    | 3  | 9  | 1 | 20 | 1163 | 1182 | UGGUU            | AAUC              | ation  | 1 |
| trf_3_3 | Bra023 | 9. |    |   |    |      |      | GGUUCUAUGGUGUAG  | AACCAAUACAUGAUAG  | Transl |   |
| 84      | 904    | 3  | 9  | 1 | 20 | 1163 | 1182 | UGGUU            | AAUC              | ation  | 1 |
| trf_3_3 | Bra037 | 14 |    |   |    |      |      | UCCGUUGUAGUCUAGC | UGACUGGUUAGGCCAC  | Transl |   |
| 86      | 499    | 3  | .7 | 1 | 22 | 174  | 195  | UGGUCA           | AACGGA            | ation  | 1 |
| trf_3_3 | Bra037 | 14 |    |   |    |      |      | UCCGUUGUAGUCUAGC | GACUGGUUAGGCCACA  | Transl |   |
| 87      | 499    | 3  | .7 | 1 | 21 | 175  | 195  | UGGUC            | ACGGA             | ation  | 1 |
| trf_3_3 | Bra023 | 9. |    |   |    |      |      | GGUUCUAUGGUGUAG  | AACCAAUACAUGAUAG  | Transl |   |
| 89      | 904    | 3  | 9  | 1 | 20 | 1163 | 1182 | UGGUU            | AAUC              | ation  | 1 |
| trf_3_3 | Bra023 | 9. |    |   |    |      |      | GGUUCUAUGGUGUAG  | AACCAAUACAUGAUAG  | Transl |   |
| 91      | 904    | 3  | 9  | 1 | 20 | 1163 | 1182 | UGGUU            | AAUC              | ation  | 1 |

|         |        |     |    |   |    |      |      |                  |                   |        |   |
|---------|--------|-----|----|---|----|------|------|------------------|-------------------|--------|---|
| trf_3_3 | Bra023 |     | 9. |   |    |      |      | GGUUCUAUGGUGUAG  | AACCAAUACAUGAUAG  | Transl |   |
| 92      | 904    | 3   | 9  | 1 | 20 | 1163 | 1182 | UGGUU            | AAUC              | ation  | 1 |
| trf_3_3 | Bra023 |     | 9. |   |    |      |      | GGUUCUAUGGUGUAG  | AACCAAUACAUGAUAG  | Transl |   |
| 93      | 904    | 3   | 9  | 1 | 20 | 1163 | 1182 | UGGUU            | AAUC              | ation  | 1 |
| trf_3_3 | Bra023 |     | 9. |   |    |      |      | GGUUCUAUGGUGUAG  | AACCAAUACAUGAUAG  | Transl |   |
| 95      | 904    | 3   | 9  | 1 | 20 | 1163 | 1182 | UGGUU            | AAUC              | ation  | 1 |
| trf_3_3 | Bra023 |     | 9. |   |    |      |      | GGUUCUAUGGUGUAG  | AACCAAUACAUGAUAG  | Transl |   |
| 96      | 904    | 3   | 9  | 1 | 20 | 1163 | 1182 | UGGUU            | AAUC              | ation  | 1 |
| trf_3_4 | Bra020 |     | 15 |   |    |      |      | UCCGUUGUCGUCCAGC | CCAACUGCUGGAAGAC  | Transl |   |
| 08      | 153    | 2.5 | .4 | 1 | 22 | 1953 | 1974 | GGUUAG           | AAUGGG            | ation  | 1 |
| trf_3_4 | Bra012 |     | 18 |   |    |      |      | UCCGUUGUCGUCCAGC | AAUCGCUGAACCACAAC | Transl |   |
| 08      | 143    | 2.5 | .5 | 1 | 20 | 392  | 411  | GGUU             | GGA               | ation  | 1 |
| trf_3_4 | Bra037 |     | 22 |   |    |      |      | UCCGUUGUCGUCCAGC | GUUGAAACCGCUGUCU  | Transl |   |
| 08      | 748    | 3   | .8 | 1 | 25 | 561  | 585  | GGUUAGGAU        | GAUAACGGA         | ation  | 1 |
| trf_3_4 | Bra020 |     | 15 |   |    |      |      | UCCGUUGUCGUCCAGC | CCAACUGCUGGAAGAC  | Transl |   |
| 09      | 153    | 2.5 | .4 | 1 | 22 | 1953 | 1974 | GGUUAG           | AAUGGG            | ation  | 1 |
| trf_3_4 | Bra012 |     | 18 |   |    |      |      | UCCGUUGUCGUCCAGC | AAUCGCUGAACCACAAC | Transl |   |
| 09      | 143    | 2.5 | .5 | 1 | 20 | 392  | 411  | GGUU             | GGA               | ation  | 1 |
| trf_3_4 | Bra037 |     | 22 |   |    |      |      | UCCGUUGUCGUCCAGC | GUUGAAACCGCUGUCU  | Transl |   |
| 09      | 748    | 3   | .8 | 1 | 25 | 561  | 585  | GGUUAGGAU        | GAUAACGGA         | ation  | 1 |
| trf_3_4 | Bra020 |     | 15 |   |    |      |      | UCCGUUGUCGUCCAGC | CCAACUGCUGGAAGAC  | Transl |   |
| 12      | 153    | 2.5 | .4 | 1 | 22 | 1953 | 1974 | GGUUAG           | AAUGGG            | ation  | 1 |
| trf_3_4 | Bra012 |     | 18 |   |    |      |      | UCCGUUGUCGUCCAGC | AAUCGCUGAACCACAAC | Transl |   |
| 12      | 143    | 2.5 | .5 | 1 | 20 | 392  | 411  | GGUU             | GGA               | ation  | 1 |
| trf_3_4 | Bra037 |     | 22 |   |    |      |      | UCCGUUGUCGUCCAGC | AACCGCUGUCUGAUAA  | Transl |   |
| 12      | 748    | 3   | .8 | 1 | 20 | 566  | 585  | GGUU             | CGGA              | ation  | 1 |
| trf_3_4 | Bra020 |     | 15 |   |    |      |      | UCCGUUGUCGUCCAGC | CCAACUGCUGGAAGAC  | Transl |   |
| 13      | 153    | 2.5 | .4 | 1 | 22 | 1953 | 1974 | GGUUAG           | AAUGGG            | ation  | 1 |
| trf_3_4 | Bra012 |     | 18 |   |    |      |      | UCCGUUGUCGUCCAGC | AAUCGCUGAACCACAAC | Transl |   |
| 13      | 143    | 2.5 | .5 | 1 | 20 | 392  | 411  | GGUU             | GGA               | ation  | 1 |
| trf_3_4 | Bra037 |     | 22 |   |    |      |      | UCCGUUGUCGUCCAGC | GUUGAAACCGCUGUCU  | Transl |   |
| 13      | 748    | 3   | .8 | 1 | 25 | 561  | 585  | GGUUAGGAU        | GAUAACGGA         | ation  | 1 |
| trf_3_4 | Bra020 |     | 15 |   |    |      |      | UCCGUUGUCGUCCAGC | CCAACUGCUGGAAGAC  | Transl |   |
| 14      | 153    | 2.5 | .4 | 1 | 22 | 1953 | 1974 | GGUUAG           | AAUGGG            | ation  | 1 |

|         |        |     |    |   |    |      |      |                  |                   |        |   |
|---------|--------|-----|----|---|----|------|------|------------------|-------------------|--------|---|
| trf_3_4 | Bra012 | 18  |    |   |    |      |      | UCCGUUGUCGUCCAGC | AAUCGCUGAACCACAAC | Transl |   |
| 14      | 143    | 2.5 | .5 | 1 | 20 | 392  | 411  | GGUU             | GGA               | ation  | 1 |
| trf_3_4 | Bra037 | 22  |    |   |    |      |      | UCCGUUGUCGUCCAGC | AACCGCUGUCUGAUAA  | Transl |   |
| 14      | 748    | 3   | .8 | 1 | 20 | 566  | 585  | GGUU             | CGGA              | ation  | 1 |
| trf_3_4 | Bra020 | 15  |    |   |    |      |      | UCCGUUGUCGUCCAGC | AACUGCUGGAAGACAA  | Transl |   |
| 15      | 153    | 2.5 | .4 | 1 | 20 | 1955 | 1974 | GGUU             | UGGG              | ation  | 1 |
| trf_3_4 | Bra012 | 18  |    |   |    |      |      | UCCGUUGUCGUCCAGC | AAUCGCUGAACCACAAC | Transl |   |
| 15      | 143    | 2.5 | .5 | 1 | 20 | 392  | 411  | GGUU             | GGA               | ation  | 1 |
| trf_3_4 | Bra037 | 22  |    |   |    |      |      | UCCGUUGUCGUCCAGC | AACCGCUGUCUGAUAA  | Transl |   |
| 15      | 748    | 3   | .8 | 1 | 20 | 566  | 585  | GGUU             | CGGA              | ation  | 1 |
| trf_3_4 | Bra033 | 21  |    |   |    |      |      | GGGGAUGUAGCUCAAA | ACCCUUUGGGUAACAU  | Transl |   |
| 26      | 370    | 3   | .6 | 1 | 20 | 4750 | 4769 | UGGU             | CCCC              | ation  | 1 |
| trf_3_4 | Bra037 | 14  |    |   |    |      |      | UCCGUUGUAGUCUAGC | UGACUGGUUAGGCCAC  | Transl |   |
| 64      | 499    | 3   | .7 | 1 | 22 | 174  | 195  | UGGUCA           | AACGGA            | ation  | 1 |
| trf_3_4 | Bra023 | 9.  |    |   |    |      |      | GGUUCUAUGGUGUAG  | AACCAAUACAUGAUAG  | Transl |   |
| 66      | 904    | 3   | 9  | 1 | 20 | 1163 | 1182 | UGGUU            | AAUC              | ation  | 1 |
| trf_3_4 | Bra023 | 9.  |    |   |    |      |      | GGUUCUAUGGUGUAG  | AACCAAUACAUGAUAG  | Transl |   |
| 67      | 904    | 3   | 9  | 1 | 20 | 1163 | 1182 | UGGUU            | AAUC              | ation  | 1 |
| trf_3_4 | Bra023 | 9.  |    |   |    |      |      | GGUUCUAUGGUGUAG  | AACCAAUACAUGAUAG  | Transl |   |
| 68      | 904    | 3   | 9  | 1 | 20 | 1163 | 1182 | UGGUU            | AAUC              | ation  | 1 |
| trf_3_4 | Bra023 | 9.  |    |   |    |      |      | GGUUCUAUGGUGUAG  | AACCAAUACAUGAUAG  | Transl |   |
| 69      | 904    | 3   | 9  | 1 | 20 | 1163 | 1182 | UGGUU            | AAUC              | ation  | 1 |
| trf_3_4 | Bra023 | 9.  |    |   |    |      |      | GGUUCUAUGGUGUAG  | AACCAAUACAUGAUAG  | Transl |   |
| 70      | 904    | 3   | 9  | 1 | 20 | 1163 | 1182 | UGGUU            | AAUC              | ation  | 1 |
| trf_3_4 | Bra033 | 21  |    |   |    |      |      | GGGGAUGUAGCUCAAA | ACCCUUUGGGUAACAU  | Transl |   |
| 81      | 370    | 3   | .6 | 1 | 20 | 4750 | 4769 | UGGU             | CCCC              | ation  | 1 |

# tRF Unpollinated Ovules

| ncRNA<br>_Acc. | Target<br>_Acc. | Expect<br>ation | U<br>PE | ncRNA<br>_start | ncRNA<br>_end | Target_<br>start | Target<br>_end | ncRNA_aligned_fragme<br>nt | Target_aligned_fragme<br>nt | Inhibit<br>ion | Multip<br>licity |
|----------------|-----------------|-----------------|---------|-----------------|---------------|------------------|----------------|----------------------------|-----------------------------|----------------|------------------|
| trf_4_1        | Bra000          | 2.5             | .2      | 1               | 21            | 984              | 1004           | UCCGUUAUCGUCCAGC           | UAACCGGAGGACGAUA            | Cleava<br>ge   | 1                |
| trf_4_2        | Bra000          | 2.5             | .2      | 1               | 21            | 984              | 1004           | GGUUA                      | AUGGA                       | Cleava<br>ge   | 1                |
| trf_4_4        | Bra000          | 2.5             | .2      | 1               | 21            | 984              | 1004           | UCCGUUAUCGUCCAGC           | UAACCGGAGGACGAUA            | Cleava<br>ge   | 1                |
| trf_4_5        | Bra000          | 2.5             | .2      | 1               | 20            | 985              | 1004           | GGUUA                      | AUGGA                       | Cleava<br>ge   | 1                |
| trf_4_4        | Bra000          | 3               | .2      | 1               | 21            | 984              | 1004           | UCCGUUAUCGUCCAGC           | AACCGGAGGACGAUAA            | Cleava<br>ge   | 1                |
| trf_4_8        | Bra000          | 3               | .2      | 1               | 20            | 985              | 1004           | GGUU                       | UGGA                        | Cleava<br>ge   | 1                |
| trf_4_8        | Bra000          | 2.5             | .2      | 1               | 21            | 984              | 1004           | UCCGUUAUCGUCCAGC           | UAACCGGAGGACGAUA            | Cleava<br>ge   | 1                |
| trf_4_8        | Bra000          | 2.5             | .2      | 1               | 21            | 984              | 1004           | GGUUA                      | AUGGA                       | Cleava<br>ge   | 1                |
| trf_4_8        | Bra000          | 2.5             | .2      | 1               | 21            | 984              | 1004           | UCCGUUAUCGUCCAGC           | UAACCGGAGGACGAUA            | Cleava<br>ge   | 1                |
| trf_4_8        | Bra000          | 2.5             | .2      | 1               | 20            | 985              | 1004           | GGUU                       | UGGA                        | Cleava<br>ge   | 1                |
| trf_4_8        | Bra000          | 2.5             | .2      | 1               | 21            | 984              | 1004           | UCCGUUAUCGUCCAGC           | UAACCGGAGGACGAUA            | Cleava<br>ge   | 1                |
| trf_4_1        | Bra000          | 3               | .2      | 1               | 21            | 984              | 1004           | GGUUA                      | AUGGA                       | Cleava<br>ge   | 1                |
| trf_4_1        | Bra000          | 3               | .2      | 1               | 21            | 984              | 1004           | UCCGUUGUCGUCCAGC           | UAACCGGAGGACGAUA            | Cleava<br>ge   | 1                |
| trf_4_1        | Bra000          | 3               | .2      | 1               | 21            | 984              | 1004           | GGUUA                      | AUGGA                       | Cleava<br>ge   | 1                |
| trf_4_1        | Bra000          | 3               | .2      | 1               | 21            | 984              | 1004           | UCCGUUGUCGUCCAGC           | UAACCGGAGGACGAUA            | Cleava<br>ge   | 1                |
| trf_4_1        | Bra000          | 3               | .2      | 1               | 21            | 984              | 1004           | GGUUA                      | AUGGA                       | Cleava<br>ge   | 1                |
| trf_4_1        | Bra000          | 3               | .2      | 1               | 21            | 984              | 1004           | UCCGUUGUCGUCCAGC           | UAACCGGAGGACGAUA            | Cleava<br>ge   | 1                |
| trf_4_1        | Bra000          | 3               | .2      | 1               | 21            | 984              | 1004           | GGUUA                      | AUGGA                       | Cleava<br>ge   | 1                |

|         |        |     |    |   |    |      |      |                  |                   |        |   |
|---------|--------|-----|----|---|----|------|------|------------------|-------------------|--------|---|
| trf_4_1 | Bra000 | 11  |    |   |    |      |      | UCCGUUGUCGUCCAGC | UAACCGGAGGACGAUA  | Cleava |   |
| 11      | 529    | 3   | .2 | 1 | 21 | 984  | 1004 | GGUUA            | AUGGA             | ge     | 1 |
| trf_4_1 | Bra000 | 11  |    |   |    |      |      | UCCGUUGUCGUCCAGC | UAACCGGAGGACGAUA  | Cleava |   |
| 69      | 529    | 3   | .2 | 1 | 21 | 984  | 1004 | GGUUA            | AUGGA             | ge     | 1 |
| trf_4_1 | Bra000 | 11  |    |   |    |      |      | UCCGUUGUCGUCCAGC | UAACCGGAGGACGAUA  | Cleava |   |
| 70      | 529    | 3   | .2 | 1 | 21 | 984  | 1004 | GGUUA            | AUGGA             | ge     | 1 |
| trf_4_1 | Bra000 | 11  |    |   |    |      |      | UCCGUUGUCGUCCAGC | UAACCGGAGGACGAUA  | Cleava |   |
| 72      | 529    | 3   | .2 | 1 | 21 | 984  | 1004 | GGUUA            | AUGGA             | ge     | 1 |
| trf_4_6 | Bra000 | 15  |    |   |    |      |      | GGUUCUAUGGUCUAGC | GACCGCUGGACCAGAG  | Cleava |   |
| 0       | 719    | 3   | .3 | 1 | 20 | 1680 | 1699 | GGUU             | AACU              | ge     | 1 |
| trf_4_5 | Bra000 | 16  |    |   |    |      |      | GACGGUUUGGCCGAGU | AACCAUUCGCCAAAUC  | Cleava |   |
| 8       | 788    | 3   | .6 | 1 | 20 | 52   | 71   | GGUC             | GUC               | ge     | 1 |
| trf_4_5 | Bra002 | 10  |    |   |    |      |      | GACGGUUUGGCCGAGU | GACUUUCCGGCCAAAC  | Cleava |   |
| 8       | 609    | 3   | .2 | 1 | 20 | 1237 | 1256 | GGUC             | CGUC              | ge     | 1 |
| trf_4_7 | Bra002 | 16  |    |   |    |      |      | AGGGAUAUAACUCAGC | CUGCUGCUGAGUUCUA  | Cleava |   |
| 6       | 746    | 3   | .3 | 1 | 21 | 218  | 238  | GGUAG            | UCCCA             | ge     | 1 |
| trf_4_1 | Bra003 | 16  |    |   |    |      |      | GCUGGAGUAGCUCAGU | CCUACGGAGCUGCUC   | Cleava |   |
| 88      | 013    | 3   | .5 | 1 | 20 | 319  | 338  | UGGU             | CAGC              | ge     | 1 |
| trf_4_5 | Bra003 | 24  |    |   |    |      |      | GACGGUUUGGCCGAGU | GGCGAUUCGGCCAAAU  | Cleava |   |
| 8       | 534    | 3   | .7 | 1 | 20 | 3589 | 3608 | GGUC             | UGUC              | ge     | 1 |
| trf_4_1 | Bra003 | 13  |    |   |    |      |      | GGGAUUGUAGUUCAA  | UCCAGUUAUUCUACAA  | Transl |   |
| 44      | 597    | 3   | .1 | 1 | 20 | 1508 | 1527 | UUGGA            | UUCC              | ation  | 1 |
| trf_4_1 | Bra003 | 13  |    |   |    |      |      | GGGAUUGUAGUUCAA  | UCCAGUUAUUCUACAA  | Transl |   |
| 52      | 597    | 3   | .1 | 1 | 20 | 1508 | 1527 | UUGGA            | UUCC              | ation  | 1 |
| trf_4_1 | Bra003 | 13  |    |   |    |      |      | GGGAUUGUAGUUCAA  | UCCAGUUAUUCUACAA  | Transl |   |
| 53      | 597    | 3   | .1 | 1 | 20 | 1508 | 1527 | UUGGA            | UUCC              | ation  | 1 |
| trf_4_1 | Bra003 | 23  |    |   |    |      |      | GCUGGAGUAGCUCAGU | CGAACCAACCGGGCUAC | Cleava |   |
| 88      | 602    | 3   | .1 | 1 | 23 | 271  | 293  | UGGUUAG          | UGCAGC            | ge     | 1 |
| trf_4_1 | Bra003 | 16  |    |   |    |      |      | GGGAUUGUAGUUCAA  | ACCAGUUGAAUUACAA  | Cleava |   |
| 39      | 753    | 1.5 | .2 | 1 | 20 | 284  | 303  | UUGGU            | UCCU              | ge     | 1 |
| trf_4_1 | Bra003 | 16  |    |   |    |      |      | GGGAUUGUAGUUCAA  | ACCAGUUGAAUUACAA  | Cleava |   |
| 41      | 753    | 1.5 | .2 | 1 | 20 | 284  | 303  | UUGGU            | UCCU              | ge     | 1 |
| trf_4_1 | Bra003 | 16  |    |   |    |      |      | GGGAUUGUAGUUCAA  | ACCAGUUGAAUUACAA  | Cleava |   |
| 42      | 753    | 1.5 | .2 | 1 | 20 | 284  | 303  | UUGGU            | UCCU              | ge     | 1 |

|         |        |     |    |   |    |     |     |                  |                  |             |   |
|---------|--------|-----|----|---|----|-----|-----|------------------|------------------|-------------|---|
| trf_4_1 | Bra003 | 16  |    |   |    |     |     | GGGAUUGUAGUUCAA  | ACCAGUUGAAUUACAA | Cleavage    |   |
| 43      | 753    | 2.5 | .2 | 1 | 20 | 284 | 303 | UCGGU            | UCCU             | ge          | 1 |
| trf_4_1 | Bra003 | 16  |    |   |    |     |     | GGGAUUGUAGUUCAA  | ACCAGUUGAAUUACAA | Cleavage    |   |
| 44      | 753    | 2.5 | .2 | 1 | 20 | 284 | 303 | UUGGA            | UCCU             | ge          | 1 |
| trf_4_1 | Bra003 | 16  |    |   |    |     |     | GGGAUUGUAGUUCAA  | AACCAGUUGAAUUACA | Cleavage    |   |
| 46      | 753    | 2.5 | .2 | 1 | 21 | 283 | 303 | UUGGCU           | AUCCU            | ge          | 1 |
| trf_4_1 | Bra003 | 16  |    |   |    |     |     | GGGAUUGUAGUUCAA  | ACCAGUUGAAUUACAA | Cleavage    |   |
| 49      | 753    | 1.5 | .2 | 1 | 20 | 284 | 303 | UUGGU            | UCCU             | ge          | 1 |
| trf_4_1 | Bra003 | 16  |    |   |    |     |     | GGGAUUGUAGUUCAA  | ACCAGUUGAAUUACAA | Cleavage    |   |
| 50      | 753    | 2.5 | .2 | 1 | 20 | 284 | 303 | UUGGC            | UCCU             | ge          | 1 |
| trf_4_1 | Bra003 | 16  |    |   |    |     |     | GGGAUUGUAGUUCAA  | ACCAGUUGAAUUACAA | Cleavage    |   |
| 51      | 753    | 1.5 | .2 | 1 | 20 | 284 | 303 | UUGGU            | UCCU             | ge          | 1 |
| trf_4_1 | Bra003 | 16  |    |   |    |     |     | GGGAUUGUAGUUCAA  | ACCAGUUGAAUUACAA | Cleavage    |   |
| 52      | 753    | 2.5 | .2 | 1 | 20 | 284 | 303 | UUGGA            | UCCU             | ge          | 1 |
| trf_4_1 | Bra003 | 16  |    |   |    |     |     | GGGAUUGUAGUUCAA  | ACCAGUUGAAUUACAA | Cleavage    |   |
| 53      | 753    | 2.5 | .2 | 1 | 20 | 284 | 303 | UUGGA            | UCCU             | ge          | 1 |
| trf_4_1 | Bra003 | 16  |    |   |    |     |     | GGGAUUGUAGUUCAA  | ACCAGUUGAAUUACAA | Cleavage    |   |
| 54      | 753    | 2.5 | .2 | 1 | 20 | 284 | 303 | UCGGU            | UCCU             | ge          | 1 |
| trf_4_1 | Bra003 | 16  |    |   |    |     |     | GGGAUUGUAGUUCAA  | ACCAGUUGAAUUACAA | Cleavage    |   |
| 55      | 753    | 1.5 | .2 | 1 | 20 | 284 | 303 | UUGGU            | UCCU             | ge          | 1 |
| trf_4_1 | Bra003 | 16  |    |   |    |     |     | GGGAUUGUAGUUCAA  | ACCAGUUGAAUUACAA | Cleavage    |   |
| 56      | 753    | 2.5 | .2 | 1 | 20 | 284 | 303 | UUGGC            | UCCU             | ge          | 1 |
| trf_4_1 | Bra003 | 16  |    |   |    |     |     | GGGAUUGUAGUUCAA  | ACCAGUUGAAUUACAA | Cleavage    |   |
| 57      | 753    | 1.5 | .2 | 1 | 20 | 284 | 303 | UUGGU            | UCCU             | ge          | 1 |
| trf_4_1 | Bra003 | 16  |    |   |    |     |     | GGGAUUGUAGUUCAA  | ACCAGUUGAAUUACAA | Cleavage    |   |
| 58      | 753    | 2.5 | .2 | 1 | 20 | 284 | 303 | UUGGC            | UCCU             | ge          | 1 |
| trf_4_1 | Bra003 | 16  |    |   |    |     |     | GGGAUUGUAGUUCAA  | ACCAGUUGAAUUACAA | Cleavage    |   |
| 60      | 753    | 1.5 | .2 | 1 | 20 | 284 | 303 | UUGGU            | UCCU             | ge          | 1 |
| trf_4_1 | Bra005 | 13  |    |   |    |     |     | GCUGGAGU-        | AACCAACUGAUCUCAC | Translation |   |
| 88      | 116    | 3   | .5 | 1 | 21 | 233 | 254 | AGCUCAGUUGGUU    | UCCAGC           | ation       | 1 |
| trf_4_1 | Bra007 | 14  |    |   |    |     |     | GCACCAGUGGUCUAGU | UUACUACUGGACCUUU | Cleavage    |   |
| 08      | 154    | 2.5 | .1 | 1 | 21 | 510 | 530 | GGUAG            | GGUGC            | ge          | 1 |
| trf_4_4 | Bra007 | 20  |    |   |    |     |     | GGUCCCAUGGUCUAGC | GGCUGCUAGACCUUGG | Cleavage    |   |
| 0       | 535    | 3   | .1 | 1 | 20 | 51  | 70  | GGUU             | GAUC             | ge          | 1 |

|         |        |     |    |   |    |      |      |                  |                   |             |  |
|---------|--------|-----|----|---|----|------|------|------------------|-------------------|-------------|--|
| trf_4_5 | Bra007 | 20  |    |   |    |      |      | GGUCCCAUGGUCUAGC | GGCUGCUAGACCUUGG  | Cleavage    |  |
| 9       | 535    | 3   | .1 | 1 | 20 | 51   | 70   | GGUU             | GAUC              | 1           |  |
| trf_4_4 | Bra012 | 18  |    |   |    |      |      | UCCGUUGUCGUCCAGC | AAUCGCUGAACCACAAC | Translation |  |
| 1       | 143    | 2.5 | .5 | 1 | 20 | 392  | 411  | GGUU             | GGA               | 1           |  |
| trf_4_4 | Bra012 | 18  |    |   |    |      |      | UCCGUUGUCGUCCAGC | AAUCGCUGAACCACAAC | Translation |  |
| 2       | 143    | 2.5 | .5 | 1 | 20 | 392  | 411  | GGUU             | GGA               | 1           |  |
| trf_4_1 | Bra012 | 18  |    |   |    |      |      | UCCGUUGUCGUCCAGC | AAUCGCUGAACCACAAC | Translation |  |
| 02      | 143    | 2.5 | .5 | 1 | 20 | 392  | 411  | GGUU             | GGA               | 1           |  |
| trf_4_1 | Bra012 | 18  |    |   |    |      |      | UCCGUUGUCGUCCAGC | AAUCGCUGAACCACAAC | Translation |  |
| 03      | 143    | 2.5 | .5 | 1 | 20 | 392  | 411  | GGUU             | GGA               | 1           |  |
| trf_4_1 | Bra012 | 18  |    |   |    |      |      | UCCGUUGUCGUCCAGC | AAUCGCUGAACCACAAC | Translation |  |
| 04      | 143    | 2.5 | .5 | 1 | 20 | 392  | 411  | GGUU             | GGA               | 1           |  |
| trf_4_1 | Bra012 | 18  |    |   |    |      |      | UCCGUUGUCGUCCAGC | AAUCGCUGAACCACAAC | Translation |  |
| 10      | 143    | 2.5 | .5 | 1 | 20 | 392  | 411  | GGUU             | GGA               | 1           |  |
| trf_4_1 | Bra012 | 18  |    |   |    |      |      | UCCGUUGUCGUCCAGC | AAUCGCUGAACCACAAC | Translation |  |
| 11      | 143    | 2.5 | .5 | 1 | 20 | 392  | 411  | GGUU             | GGA               | 1           |  |
| trf_4_1 | Bra012 | 18  |    |   |    |      |      | UCCGUUGUCGUCCAGC | AAUCGCUGAACCACAAC | Translation |  |
| 69      | 143    | 2.5 | .5 | 1 | 20 | 392  | 411  | GGUU             | GGA               | 1           |  |
| trf_4_1 | Bra012 | 18  |    |   |    |      |      | UCCGUUGUCGUCCAGC | AAUCGCUGAACCACAAC | Translation |  |
| 70      | 143    | 2.5 | .5 | 1 | 20 | 392  | 411  | GGUU             | GGA               | 1           |  |
| trf_4_1 | Bra012 | 18  |    |   |    |      |      | UCCGUUGUCGUCCAGC | AAUCGCUGAACCACAAC | Translation |  |
| 72      | 143    | 2.5 | .5 | 1 | 20 | 392  | 411  | GGUU             | GGA               | 1           |  |
| trf_4_7 | Bra012 | 14  |    |   |    |      |      | AGGGAUAUAACUCAGC | UACCUUUGAGUUAUG   | Cleavage    |  |
| 6       | 734    | 3   | .1 | 1 | 20 | 1709 | 1728 | GGUA             | UUUCU             | 1           |  |
| trf_4_4 | Bra012 | 16  |    |   |    |      |      | GGUCCCAUGGUCUAGC | AACUGCUACUCCAUGG  | Translation |  |
| 0       | 946    | 3   | .6 | 1 | 20 | 957  | 976  | GGUU             | GACU              | 1           |  |
| trf_4_5 | Bra012 | 16  |    |   |    |      |      | GGUCCCAUGGUCUAGC | AACUGCUACUCCAUGG  | Translation |  |
| 9       | 946    | 3   | .6 | 1 | 20 | 957  | 976  | GGUU             | GACU              | 1           |  |
| trf_4_1 | Bra013 | 19  |    |   |    |      |      | GGGAUUGUAGUUCAA  | ACUAAUUGAACUAAGA  | Cleavage    |  |
| 39      | 336    | 3   | .5 | 1 | 20 | 267  | 286  | UUGGU            | UCUC              | 1           |  |
| trf_4_1 | Bra013 | 19  |    |   |    |      |      | GGGAUUGUAGUUCAA  | ACUAAUUGAACUAAGA  | Cleavage    |  |
| 41      | 336    | 3   | .5 | 1 | 20 | 267  | 286  | UUGGU            | UCUC              | 1           |  |
| trf_4_1 | Bra013 | 19  |    |   |    |      |      | GGGAUUGUAGUUCAA  | ACUAAUUGAACUAAGA  | Cleavage    |  |
| 42      | 336    | 3   | .5 | 1 | 20 | 267  | 286  | UUGGU            | UCUC              | 1           |  |

|         |        |    |    |   |    |     |     |                  |                  |        |   |
|---------|--------|----|----|---|----|-----|-----|------------------|------------------|--------|---|
| trf_4_1 | Bra013 | 19 |    |   |    |     |     | GGGAUUGUAGUUCAA  | ACUAAUUGAACUAAGA | Cleava |   |
| 49      | 336    | 3  | .5 | 1 | 20 | 267 | 286 | UUGGU            | UCUC             | ge     | 1 |
| trf_4_1 | Bra013 | 19 |    |   |    |     |     | GGGAUUGUAGUUCAA  | ACUAAUUGAACUAAGA | Cleava |   |
| 51      | 336    | 3  | .5 | 1 | 20 | 267 | 286 | UUGGU            | UCUC             | ge     | 1 |
| trf_4_1 | Bra013 | 19 |    |   |    |     |     | GGGAUUGUAGUUCAA  | ACUAAUUGAACUAAGA | Cleava |   |
| 55      | 336    | 3  | .5 | 1 | 20 | 267 | 286 | UUGGU            | UCUC             | ge     | 1 |
| trf_4_1 | Bra013 | 19 |    |   |    |     |     | GGGAUUGUAGUUCAA  | ACUAAUUGAACUAAGA | Cleava |   |
| 57      | 336    | 3  | .5 | 1 | 20 | 267 | 286 | UUGGU            | UCUC             | ge     | 1 |
| trf_4_1 | Bra013 | 19 |    |   |    |     |     | GGGAUUGUAGUUCAA  | ACUAAUUGAACUAAGA | Cleava |   |
| 60      | 336    | 3  | .5 | 1 | 20 | 267 | 286 | UUGGU            | UCUC             | ge     | 1 |
|         | Bra013 | 22 |    |   |    |     |     | UCCGUUGUAGUCUAGC | CAUCAUCAGCUUGGCU | Cleava |   |
| trf_4_6 | 528    | 3  | .0 | 1 | 24 | 196 | 219 | UGGUUAGG         | AUAACGGG         | ge     | 1 |
| trf_4_1 | Bra013 | 22 |    |   |    |     |     | UCCGUUGUAGUCUAGC | CAUCAUCAGCUUGGCU | Cleava |   |
| 09      | 528    | 3  | .0 | 1 | 24 | 196 | 219 | UGGUCAGG         | AUAACGGG         | ge     | 1 |
| trf_4_1 | Bra013 | 22 |    |   |    |     |     | UCCGUUGUAGUCUAGC | CAUCAUCAGCUUGGCU | Cleava |   |
| 86      | 528    | 3  | .0 | 1 | 24 | 196 | 219 | UGGUCAGG         | AUAACGGG         | ge     | 1 |
| trf_4_4 | Bra013 | 16 |    |   |    |     |     | UCCGUUGUCGUCCAGC | AUGAUAACCGAUGGAU | Cleava |   |
| 1       | 584    | 3  | .4 | 1 | 25 | 886 | 910 | GGUUAGGAU        | GUCAAUGGA        | ge     | 1 |
| trf_4_4 | Bra013 | 16 |    |   |    |     |     | UCCGUUGUCGUCCAGC | AACCGAUGGAUGUCA  | Cleava |   |
| 2       | 584    | 3  | .4 | 1 | 20 | 891 | 910 | GGUU             | UGGA             | ge     | 1 |
| trf_4_1 | Bra013 | 16 |    |   |    |     |     | UCCGUUGUCGUCCAGC | UAUGAUAACCGAUGGA | Cleava |   |
| 02      | 584    | 3  | .4 | 1 | 26 | 885 | 910 | GGUUAGGAUA       | UGUCA AUGGA      | ge     | 1 |
| trf_4_1 | Bra013 | 16 |    |   |    |     |     | UCCGUUGUCGUCCAGC | AUGAUAACCGAUGGAU | Cleava |   |
| 03      | 584    | 3  | .4 | 1 | 25 | 886 | 910 | GGUUAGGAU        | GUCAAUGGA        | ge     | 1 |
| trf_4_1 | Bra013 | 16 |    |   |    |     |     | UCCGUUGUCGUCCAGC | UAACCGAUGGAUGUCA | Cleava |   |
| 04      | 584    | 3  | .4 | 1 | 21 | 890 | 910 | GGUUA            | AUGGA            | ge     | 1 |
| trf_4_1 | Bra013 | 16 |    |   |    |     |     | UCCGUUGUCGUCCAGC | UAACCGAUGGAUGUCA | Cleava |   |
| 10      | 584    | 3  | .4 | 1 | 21 | 890 | 910 | GGUUA            | AUGGA            | ge     | 1 |
| trf_4_1 | Bra013 | 16 |    |   |    |     |     | UCCGUUGUCGUCCAGC | AUGAUAACCGAUGGAU | Cleava |   |
| 11      | 584    | 3  | .4 | 1 | 25 | 886 | 910 | GGUUAGGAU        | GUCAAUGGA        | ge     | 1 |
| trf_4_1 | Bra013 | 16 |    |   |    |     |     | UCCGUUGUCGUCCAGC | AUGAUAACCGAUGGAU | Cleava |   |
| 69      | 584    | 3  | .4 | 1 | 25 | 886 | 910 | GGUUAGGAU        | GUCAAUGGA        | ge     | 1 |
| trf_4_1 | Bra013 | 16 |    |   |    |     |     | UCCGUUGUCGUCCAGC | UAUGAUAACCGAUGGA | Cleava |   |
| 70      | 584    | 3  | .4 | 1 | 26 | 885 | 910 | GGUUAGGAUA       | UGUCA AUGGA      | ge     | 1 |



|         |        |    |    |   |    |     |     |                  |                   |        |   |
|---------|--------|----|----|---|----|-----|-----|------------------|-------------------|--------|---|
| trf_4_1 | Bra013 | 16 |    |   |    |     |     | UCCGUUGUCGUCCAGC | UAUGAUAACCGAUGGA  | Cleava |   |
| 72      | 584    | 3  | .4 | 1 | 26 | 885 | 910 | GGUUAGGAUA       | UGUCA AUGGA       | ge     | 1 |
| trf_4_4 | Bra014 | 21 |    |   |    |     |     | GGUCCCAUGGUCUAGC | AGCUGCUAGACCUUGG  | Cleava |   |
| 0       | 489    | 2  | .1 | 1 | 20 | 168 | 187 | GGUU             | GACC              | ge     | 1 |
| trf_4_5 | Bra014 | 21 |    |   |    |     |     | GGUCCCAUGGUCUAGC | AGCUGCUAGACCUUGG  | Cleava |   |
| 9       | 489    | 2  | .1 | 1 | 20 | 168 | 187 | GGUU             | GACC              | ge     | 1 |
| trf_4_6 | Bra014 | 21 |    |   |    |     |     | GGUUCUAUGGUCUAGC | AGCUGCUAGACCUUGG  | Cleava |   |
| 0       | 489    | 3  | .1 | 1 | 20 | 168 | 187 | GGUU             | GACC              | ge     | 1 |
| trf_4_1 | Bra014 | 17 |    |   |    |     |     | GGGGAUGUAGCUCAUA | UGUAUUUAUUAGCU    | Cleava |   |
| 13      | 507    | 3  | .0 | 1 | 23 | 541 | 563 | UGGUAGA          | AUAUCUCC          | ge     | 1 |
| trf_4_1 | Bra015 | 24 |    |   |    |     |     | AUCAGAGUGGCGCAGC | CUCCGUU UCCACUGCA | Transl |   |
| 21      | 824    | 3  | .0 | 1 | 26 | 913 | 938 | GGAAGCGUGG       | CCACUCUGAC        | ation  | 1 |
| trf_4_1 | Bra015 | 24 |    |   |    |     |     | AUCAGAGUGGCGCAGC | CUCCGUU UCCACUGCA | Transl |   |
| 36      | 824    | 3  | .0 | 1 | 26 | 913 | 938 | GGAAGCGUGG       | CCACUCUGAC        | ation  | 1 |
| trf_4_1 | Bra015 | 24 |    |   |    |     |     | AUCAGAGUGGCGCAGC | CUCCGUU UCCACUGCA | Transl |   |
| 95      | 824    | 3  | .0 | 1 | 26 | 913 | 938 | GGAAGCGUGG       | CCACUCUGAC        | ation  | 1 |
|         | Bra016 | 20 |    |   |    |     |     | UCCGUCGUAGUCUAGC | CUGAAGAAGCUAGGCU  | Cleava |   |
| trf_4_7 | 601    | 3  | .8 | 1 | 24 | 415 | 438 | UGGUUAGG         | GCGACGGA          | ge     | 1 |
|         | Bra016 | 20 |    |   |    |     |     | UCCGUCGUAGUCUAGC | CUGAAGAAGCUAGGCU  | Cleava |   |
| trf_4_8 | 601    | 3  | .8 | 1 | 24 | 415 | 438 | UGGUUAGG         | GCGACGGA          | ge     | 1 |
|         | Bra016 | 20 |    |   |    |     |     | UCCGUCGUAGUCUAGC | AAGAAGCUAGGCUGCG  | Cleava |   |
| trf_4_9 | 601    | 3  | .8 | 1 | 21 | 418 | 438 | UGGUU            | ACGGA             | ge     | 1 |
| trf_4_1 | Bra016 | 20 |    |   |    |     |     | UCCGUCGUAGUCUAGC | CUGAAGAAGCUAGGCU  | Cleava |   |
| 1       | 601    | 3  | .8 | 1 | 24 | 415 | 438 | UGGUUAGG         | GCGACGGA          | ge     | 1 |
| trf_4_1 | Bra016 | 20 |    |   |    |     |     | UCCGUCGUAGUCUAGC | CUGAAGAAGCUAGGCU  | Cleava |   |
| 14      | 601    | 3  | .8 | 1 | 24 | 415 | 438 | UGGUUAGG         | GCGACGGA          | ge     | 1 |
| trf_4_1 | Bra016 | 20 |    |   |    |     |     | UCCGUCGUAGUCUAGC | CUGAAGAAGCUAGGCU  | Cleava |   |
| 15      | 601    | 3  | .8 | 1 | 24 | 415 | 438 | UGGUUAGG         | GCGACGGA          | ge     | 1 |
| trf_4_1 | Bra016 | 20 |    |   |    |     |     | UCCGUCGUAGUCUAGC | AAGAAGCUAGGCUGCG  | Cleava |   |
| 16      | 601    | 3  | .8 | 1 | 21 | 418 | 438 | UGGUU            | ACGGA             | ge     | 1 |
| trf_4_1 | Bra016 | 20 |    |   |    |     |     | UCCGUCGUAGUCUAGC | CUGAAGAAGCUAGGCU  | Cleava |   |
| 18      | 601    | 3  | .8 | 1 | 24 | 415 | 438 | UGGUUAGG         | GCGACGGA          | ge     | 1 |
| trf_4_1 | Bra016 | 20 |    |   |    |     |     | UCCGUCGUAGUCUAGC | CUGAAGAAGCUAGGCU  | Cleava |   |
| 76      | 601    | 3  | .8 | 1 | 24 | 415 | 438 | UGGUUAGG         | GCGACGGA          | ge     | 1 |

|         |        |     |    |   |    |      |      |                  |                   |        |   |
|---------|--------|-----|----|---|----|------|------|------------------|-------------------|--------|---|
| trf_4_1 | Bra016 | 20  |    |   |    |      |      | UCCGUCGUAGUCUAGC | AAGAAGCUAGGCUGCG  | Cleava |   |
| 77      | 601    | 3   | .8 | 1 | 21 | 418  | 438  | UGGUU            | ACGGA             | ge     | 1 |
| trf_4_1 | Bra016 | 20  |    |   |    |      |      | UCCGUCGUAGUCUAGC | CUGAAGAAGCUAGGCU  | Cleava |   |
| 78      | 601    | 3   | .8 | 1 | 24 | 415  | 438  | UGGUUAGG         | GCGACGGA          | ge     | 1 |
| trf_4_1 | Bra016 | 20  |    |   |    |      |      | UCCGUCGUAGUCUAGC | CUGAAGAAGCUAGGCU  | Cleava |   |
| 79      | 601    | 3   | .8 | 1 | 24 | 415  | 438  | UGGUUAGG         | GCGACGGA          | ge     | 1 |
| trf_4_1 | Bra016 | 20  |    |   |    |      |      | UCCGUCGUAGUCUAGC | CUGAAGAAGCUAGGCU  | Cleava |   |
| 80      | 601    | 3   | .8 | 1 | 24 | 415  | 438  | UGGUUAGG         | GCGACGGA          | ge     | 1 |
| trf_4_1 | Bra016 | 20  |    |   |    |      |      | UCCGUCGUAGUCUAGC | CUGAAGAAGCUAGGCU  | Cleava |   |
| 81      | 601    | 3   | .8 | 1 | 24 | 415  | 438  | UGGUUAGG         | GCGACGGA          | ge     | 1 |
| trf_4_5 | Bra018 | 7.  |    |   |    |      |      | GACGGUUUGGCCGAGU | CCCAAGACCACUCCUCG | Transl |   |
| 8       | 257    | 3   | 1  | 1 | 25 | 27   | 51   | GGUCUAAGG        | AAACCGUC          | ation  | 1 |
| trf_4_5 | Bra019 | 12  |    |   |    |      |      | GACGGUUUGGCCGAGU | UGAGACUACUUGGUCC  | Cleava |   |
| 8       | 760    | 3   | .5 | 1 | 23 | 1328 | 1350 | GGUCUAA          | AGCCGUC           | ge     | 1 |
| trf_4_4 | Bra020 | 15  |    |   |    |      |      | UCCGUUGUCGUCCAGC | CCAACUGCUGGAAGAC  | Transl |   |
| 1       | 153    | 2.5 | .4 | 1 | 22 | 1953 | 1974 | GGUUAG           | AAUGGG            | ation  | 1 |
| trf_4_4 | Bra020 | 15  |    |   |    |      |      | UCCGUUGUCGUCCAGC | AACUGCUGGAAGACAA  | Transl |   |
| 2       | 153    | 2.5 | .4 | 1 | 20 | 1955 | 1974 | GGUU             | UGGG              | ation  | 1 |
| trf_4_1 | Bra020 | 15  |    |   |    |      |      | UCCGUUGUCGUCCAGC | CCAACUGCUGGAAGAC  | Transl |   |
| 02      | 153    | 2.5 | .4 | 1 | 22 | 1953 | 1974 | GGUUAG           | AAUGGG            | ation  | 1 |
| trf_4_1 | Bra020 | 15  |    |   |    |      |      | UCCGUUGUCGUCCAGC | CCAACUGCUGGAAGAC  | Transl |   |
| 03      | 153    | 2.5 | .4 | 1 | 22 | 1953 | 1974 | GGUUAG           | AAUGGG            | ation  | 1 |
| trf_4_1 | Bra020 | 15  |    |   |    |      |      | UCCGUUGUCGUCCAGC | CCAACUGCUGGAAGAC  | Transl |   |
| 04      | 153    | 2.5 | .4 | 1 | 22 | 1953 | 1974 | GGUUAG           | AAUGGG            | ation  | 1 |
| trf_4_1 | Bra020 | 15  |    |   |    |      |      | UCCGUUGUCGUCCAGC | CCAACUGCUGGAAGAC  | Transl |   |
| 10      | 153    | 2.5 | .4 | 1 | 22 | 1953 | 1974 | GGUUAG           | AAUGGG            | ation  | 1 |
| trf_4_1 | Bra020 | 15  |    |   |    |      |      | UCCGUUGUCGUCCAGC | CCAACUGCUGGAAGAC  | Transl |   |
| 11      | 153    | 2.5 | .4 | 1 | 22 | 1953 | 1974 | GGUUAG           | AAUGGG            | ation  | 1 |
| trf_4_1 | Bra020 | 15  |    |   |    |      |      | UCCGUUGUCGUCCAGC | CCAACUGCUGGAAGAC  | Transl |   |
| 69      | 153    | 2.5 | .4 | 1 | 22 | 1953 | 1974 | GGUUAG           | AAUGGG            | ation  | 1 |
| trf_4_1 | Bra020 | 15  |    |   |    |      |      | UCCGUUGUCGUCCAGC | CCAACUGCUGGAAGAC  | Transl |   |
| 70      | 153    | 2.5 | .4 | 1 | 22 | 1953 | 1974 | GGUUAG           | AAUGGG            | ation  | 1 |
| trf_4_1 | Bra020 | 15  |    |   |    |      |      | UCCGUUGUCGUCCAGC | CCAACUGCUGGAAGAC  | Transl |   |
| 72      | 153    | 2.5 | .4 | 1 | 22 | 1953 | 1974 | GGUUAG           | AAUGGG            | ation  | 1 |

|         |        |    |    |   |    |      |      |                  |                  |             |   |
|---------|--------|----|----|---|----|------|------|------------------|------------------|-------------|---|
| trf_4_1 | Bra021 | 23 |    |   |    |      |      | GGGAUUGUAGUUCAA  | ACCAACUGAACUGCAA | Cleavage    |   |
| 39      | 314    | 3  | .2 | 1 | 20 | 234  | 253  | UUGGU            | UCUG             | ge          | 1 |
| trf_4_1 | Bra021 | 23 |    |   |    |      |      | GGGAUUGUAGUUCAA  | ACCAACUGAACUGCAA | Cleavage    |   |
| 41      | 314    | 3  | .2 | 1 | 20 | 234  | 253  | UUGGU            | UCUG             | ge          | 1 |
| trf_4_1 | Bra021 | 23 |    |   |    |      |      | GGGAUUGUAGUUCAA  | ACCAACUGAACUGCAA | Cleavage    |   |
| 42      | 314    | 3  | .2 | 1 | 20 | 234  | 253  | UUGGU            | UCUG             | ge          | 1 |
| trf_4_1 | Bra021 | 23 |    |   |    |      |      | GGGAUUGUAGUUCAA  | ACCAACUGAACUGCAA | Cleavage    |   |
| 49      | 314    | 3  | .2 | 1 | 20 | 234  | 253  | UUGGU            | UCUG             | ge          | 1 |
| trf_4_1 | Bra021 | 23 |    |   |    |      |      | GGGAUUGUAGUUCAA  | ACCAACUGAACUGCAA | Cleavage    |   |
| 51      | 314    | 3  | .2 | 1 | 20 | 234  | 253  | UUGGU            | UCUG             | ge          | 1 |
| trf_4_1 | Bra021 | 23 |    |   |    |      |      | GGGAUUGUAGUUCAA  | ACCAACUGAACUGCAA | Cleavage    |   |
| 55      | 314    | 3  | .2 | 1 | 20 | 234  | 253  | UUGGU            | UCUG             | ge          | 1 |
| trf_4_1 | Bra021 | 23 |    |   |    |      |      | GGGAUUGUAGUUCAA  | ACCAACUGAACUGCAA | Cleavage    |   |
| 57      | 314    | 3  | .2 | 1 | 20 | 234  | 253  | UUGGU            | UCUG             | ge          | 1 |
| trf_4_1 | Bra021 | 23 |    |   |    |      |      | GGGAUUGUAGUUCAA  | ACCAACUGAACUGCAA | Cleavage    |   |
| 60      | 314    | 3  | .2 | 1 | 20 | 234  | 253  | UUGGU            | UCUG             | ge          | 1 |
| trf_4_1 | Bra022 | 23 |    |   |    |      |      | GCUGGAGUAGCUCAGU | AUCAAUUGGGAUACUC | Translation |   |
| 88      | 251    | 3  | .9 | 1 | 20 | 3475 | 3494 | UGGU             | UAGC             | ation       | 1 |
| trf_4_1 | Bra023 | 12 |    |   |    |      |      | GGGAUUGUAGUUCAA  | UCCAAGUGAACAUCAA | Translation |   |
| 44      | 172    | 3  | .4 | 1 | 20 | 614  | 633  | UUGGA            | UCCC             | ation       | 1 |
| trf_4_1 | Bra023 | 12 |    |   |    |      |      | GGGAUUGUAGUUCAA  | UCCAAGUGAACAUCA  | Translation |   |
| 52      | 172    | 3  | .4 | 1 | 21 | 613  | 633  | UUGGAA           | AUCCC            | ation       | 1 |
| trf_4_1 | Bra023 | 12 |    |   |    |      |      | GGGAUUGUAGUUCAA  | UCCAAGUGAACAUCAA | Translation |   |
| 53      | 172    | 3  | .4 | 1 | 20 | 614  | 633  | UUGGA            | UCCC             | ation       | 1 |
| trf_4_6 | Bra027 | 22 |    |   |    |      |      | GCCGACUUAGCUCAGU | UACCACAGGGCGAAGU | Translation |   |
| 7       | 297    | 3  | .9 | 1 | 20 | 178  | 197  | GGUA             | UGGC             | ation       | 1 |
| trf_4_1 | Bra027 | 22 |    |   |    |      |      | GCCGACUUAGCUCAGU | UACCACAGGGCGAAGU | Translation |   |
| 32      | 297    | 3  | .9 | 1 | 20 | 178  | 197  | GGUA             | UGGC             | ation       | 1 |
| trf_4_1 | Bra027 | 22 |    |   |    |      |      | GCCGACUUAGCUCAGU | UACCACAGGGCGAAGU | Translation |   |
| 33      | 297    | 3  | .9 | 1 | 20 | 178  | 197  | GGUA             | UGGC             | ation       | 1 |
| trf_4_1 | Bra029 | 20 |    |   |    |      |      | GCUGGAGUAGCUCAGU | GGUCAGCUGAGCUACU | Cleavage    |   |
| 88      | 975    | 3  | .8 | 1 | 21 | 1244 | 1264 | UGGUU            | CAAGC            | ge          | 1 |
|         | Bra032 | 22 |    |   |    |      |      | UCCGUUAUCGUCCAGC | GACGGCUUGACGAUGA | Cleavage    |   |
| trf_4_1 | 111    | 3  | .4 | 1 | 20 | 727  | 746  | GGUU             | CGGA             | ge          | 1 |

|         |        |     |    |   |    |     |     |                  |                  |             |   |
|---------|--------|-----|----|---|----|-----|-----|------------------|------------------|-------------|---|
| trf_4_2 | Bra032 | 22  |    |   |    |     |     | UCCGUUAUCGUCCAGC | GACGGCUUGACGAUGA | Cleavage    |   |
| 111     | 111    | 3   | .4 | 1 | 20 | 727 | 746 | GGUU             | CGGA             | ge          | 1 |
| trf_4_4 | Bra032 | 22  |    |   |    |     |     | UCCGUUAUCGUCCAGC | GACGGCUUGACGAUGA | Cleavage    |   |
| 111     | 111    | 3   | .4 | 1 | 20 | 727 | 746 | GGUU             | CGGA             | ge          | 1 |
| trf_4_5 | Bra032 | 22  |    |   |    |     |     | UCCGUUAUCGUCCAGC | GACGGCUUGACGAUGA | Cleavage    |   |
| 111     | 111    | 3   | .4 | 1 | 20 | 727 | 746 | GGUU             | CGGA             | ge          | 1 |
| trf_4_8 | Bra032 | 22  |    |   |    |     |     | UCCGUUAUCGUCCAGC | GACGGCUUGACGAUGA | Cleavage    |   |
| 2       | 111    | 3   | .4 | 1 | 20 | 727 | 746 | GGUU             | CGGA             | ge          | 1 |
| trf_4_8 | Bra032 | 22  |    |   |    |     |     | UCCGUUAUCGUCCAGC | GACGGCUUGACGAUGA | Cleavage    |   |
| 3       | 111    | 3   | .4 | 1 | 20 | 727 | 746 | GGUU             | CGGA             | ge          | 1 |
| trf_4_8 | Bra032 | 22  |    |   |    |     |     | UCCGUUAUCGUCCAGC | GACGGCUUGACGAUGA | Cleavage    |   |
| 4       | 111    | 3   | .4 | 1 | 20 | 727 | 746 | GGUU             | CGGA             | ge          | 1 |
| trf_4_8 | Bra032 | 22  |    |   |    |     |     | UCCGUUAUCGUCCAGC | GACGGCUUGACGAUGA | Cleavage    |   |
| 6       | 111    | 3   | .4 | 1 | 20 | 727 | 746 | GGUU             | CGGA             | ge          | 1 |
| trf_4_8 | Bra032 | 22  |    |   |    |     |     | UCCGUUAUCGUCCAGC | GACGGCUUGACGAUGA | Cleavage    |   |
| 7       | 111    | 3   | .4 | 1 | 20 | 727 | 746 | GGUU             | CGGA             | ge          | 1 |
| trf_4_1 | Bra032 | 22  |    |   |    |     |     | GCUGGAGUAGCUCAGU | AUCGGCUGAGCCACUC | Translation |   |
| 88      | 168    | 2.5 | .3 | 1 | 20 | 150 | 169 | UGGU             | CAGC             | ation       | 1 |
| trf_4_1 | Bra033 | 18  |    |   |    |     |     | AUCAGAGUGGCGCAGC | UUACGUUGCACCACUU | Translation |   |
| 21      | 352    | 3   | .3 | 1 | 25 | 586 | 609 | GGAAGCGUG        | UGAU             | ation       | 1 |
| trf_4_1 | Bra033 | 18  |    |   |    |     |     | AUCAGAGUGGCGCAGC | UUACGUUGCACCACUU | Translation |   |
| 36      | 352    | 3   | .3 | 1 | 25 | 586 | 609 | GGAAGCGUG        | UGAU             | ation       | 1 |
| trf_4_1 | Bra033 | 18  |    |   |    |     |     | AUCAGAGUGGCGCAGC | UUACGUUGCACCACUU | Translation |   |
| 95      | 352    | 3   | .3 | 1 | 25 | 586 | 609 | GGAAGCGUG        | UGAU             | ation       | 1 |
| trf_4_1 | Bra033 | 10  |    |   |    |     |     | GGGAUUGUAGUUCAA  | ACCGAUUGAUCAGCAA | Translation |   |
| 43      | 536    | 3   | .5 | 1 | 20 | 426 | 445 | UCGGU            | UUCC             | ation       | 1 |
| trf_4_1 | Bra033 | 10  |    |   |    |     |     | GGGAUUGUAGUUCAA  | ACCGAUUGAUCAGCAA | Translation |   |
| 54      | 536    | 3   | .5 | 1 | 20 | 426 | 445 | UCGGU            | UUCC             | ation       | 1 |
| trf_4_1 | Bra034 | 11  |    |   |    |     |     | GGGAUUGUAGUUCAA  | UCCAAAUGAGCAGCAA | Translation |   |
| 44      | 753    | 3   | .6 | 1 | 20 | 443 | 462 | UUGGA            | UCCC             | ation       | 1 |
| trf_4_1 | Bra034 | 11  |    |   |    |     |     | GGGAUUGUAGUUCAA  | UCCAAAUGAGCAGCAA | Translation |   |
| 44      | 753    | 3   | .6 | 1 | 20 | 443 | 462 | UUGGA            | UCCC             | ation       | 1 |
| trf_4_1 | Bra034 | 11  |    |   |    |     |     | GGGAUUGUAGUUCAA  | UCCAAAUGAGCAGCAA | Translation |   |
| 44      | 753    | 3   | .6 | 1 | 20 | 443 | 462 | UUGGA            | UCCC             | ation       | 1 |

|         |        |     |    |   |    |     |     |                  |                  |        |   |
|---------|--------|-----|----|---|----|-----|-----|------------------|------------------|--------|---|
| 52      | 753    |     | .6 |   |    |     |     | UUGGA            | UCCC             | ation  |   |
| trf_4_1 | Bra034 |     | 11 |   |    |     |     | GGGAUUGUAGUUCAA  | UCCAAAUGAGCAGCAA | Transl |   |
| 53      | 753    | 3   | .6 | 1 | 20 | 443 | 462 | UUGGA            | UCCC             | ation  | 1 |
| trf_4_5 | Bra037 |     | 12 |   |    |     |     | GACGGUUUGGCCGAGU | UUGACUACUCGUCCAA | Transl |   |
| 8       | 152    | 3   | .2 | 1 | 22 | 478 | 499 | GGUCUA           | ACCCUC           | ation  | 1 |
|         | Bra037 |     | 14 |   |    |     |     | UCCGUUGUAGUCUAGC | UGACUGGUUAGGCCAC | Transl |   |
| trf_4_6 | 499    | 3   | .7 | 1 | 22 | 174 | 195 | UGGUUA           | AACGGA           | ation  | 1 |
| trf_4_1 | Bra037 |     | 14 |   |    |     |     | UCCGUUGUAGUCUAGC | UGACUGGUUAGGCCAC | Transl |   |
| 09      | 499    | 3   | .7 | 1 | 22 | 174 | 195 | UGGUCA           | AACGGA           | ation  | 1 |
| trf_4_1 | Bra037 |     | 14 |   |    |     |     | UCCGUUGUAGUCUAGC | UGACUGGUUAGGCCAC | Transl |   |
| 86      | 499    | 3   | .7 | 1 | 22 | 174 | 195 | UGGUCA           | AACGGA           | ation  | 1 |
|         | Bra037 |     | 22 |   |    |     |     | UCCGUUAUCGUCCAGC | GUUGAAACCGCUGUCU | Transl |   |
| trf_4_1 | 748    | 2.5 | .8 | 1 | 25 | 561 | 585 | GGUUAGGAU        | GAUAACGGA        | ation  | 1 |
|         | Bra037 |     | 22 |   |    |     |     | UCCGUUAUCGUCCAGC | GUUGAAACCGCUGUCU | Transl |   |
| trf_4_2 | 748    | 2.5 | .8 | 1 | 25 | 561 | 585 | GGUUAGGAU        | GAUAACGGA        | ation  | 1 |
|         | Bra037 |     | 22 |   |    |     |     | UCCGUUAUCGUCCAGC | GUUGAAACCGCUGUCU | Transl |   |
| trf_4_4 | 748    | 2.5 | .8 | 1 | 25 | 561 | 585 | GGUUAGGAU        | GAUAACGGA        | ation  | 1 |
|         | Bra037 |     | 22 |   |    |     |     | UCCGUUAUCGUCCAGC | AACCGCUGUCUGAUAA | Transl |   |
| trf_4_5 | 748    | 2.5 | .8 | 1 | 20 | 566 | 585 | GGUU             | CGGA             | ation  | 1 |
| trf_4_4 | Bra037 |     | 22 |   |    |     |     | UCCGUUGUCGUCCAGC | GUUGAAACCGCUGUCU | Transl |   |
| 1       | 748    | 3   | .8 | 1 | 25 | 561 | 585 | GGUUAGGAU        | GAUAACGGA        | ation  | 1 |
| trf_4_4 | Bra037 |     | 22 |   |    |     |     | UCCGUUGUCGUCCAGC | AACCGCUGUCUGAUAA | Transl |   |
| 2       | 748    | 3   | .8 | 1 | 20 | 566 | 585 | GGUU             | CGGA             | ation  | 1 |
| trf_4_8 | Bra037 |     | 22 |   |    |     |     | UCCGUUAUCGUCCAGC | GUUGAAACCGCUGUCU | Transl |   |
| 2       | 748    | 2.5 | .8 | 1 | 25 | 561 | 585 | GGUUAGGAU        | GAUAACGGA        | ation  | 1 |
| trf_4_8 | Bra037 |     | 22 |   |    |     |     | UCCGUUAUCGUCCAGC | GUUGAAACCGCUGUCU | Transl |   |
| 3       | 748    | 2.5 | .8 | 1 | 25 | 561 | 585 | GGUUAGGAU        | GAUAACGGA        | ation  | 1 |
| trf_4_8 | Bra037 |     | 22 |   |    |     |     | UCCGUUAUCGUCCAGC | AACCGCUGUCUGAUAA | Transl |   |
| 4       | 748    | 2.5 | .8 | 1 | 20 | 566 | 585 | GGUU             | CGGA             | ation  | 1 |
| trf_4_8 | Bra037 |     | 22 |   |    |     |     | UCCGUUAUCGUCCAGC | AACCGCUGUCUGAUAA | Transl |   |
| 6       | 748    | 2.5 | .8 | 1 | 20 | 566 | 585 | GGUU             | CGGA             | ation  | 1 |
| trf_4_8 | Bra037 |     | 22 |   |    |     |     | UCCGUUAUCGUCCAGC | GUUGAAACCGCUGUCU | Transl |   |
| 7       | 748    | 2.5 | .8 | 1 | 25 | 561 | 585 | GGUUAGGAU        | GAUAACGGA        | ation  | 1 |
| trf_4_1 | Bra037 | 3   | 22 | 1 | 25 | 561 | 585 | UCCGUUGUCGUCCAGC | GUUGAAACCGCUGUCU | Transl | 1 |

|         |        |   |    |   |    |     |     |                  |                  |        |   |
|---------|--------|---|----|---|----|-----|-----|------------------|------------------|--------|---|
| 02      | 748    |   | .8 |   |    |     |     | GGUUAGGAU        | GAUAACGGA        | ation  |   |
| trf_4_1 | Bra037 |   | 22 |   |    |     |     | UCCGUUGUCGUCCAGC | GUUGAAACCGCUGUCU | Transl |   |
| 03      | 748    | 3 | .8 | 1 | 25 | 561 | 585 | GGUUAGGAU        | GAUAACGGA        | ation  | 1 |
| trf_4_1 | Bra037 |   | 22 |   |    |     |     | UCCGUUGUCGUCCAGC | AACCGCUGUCUGAUAA | Transl |   |
| 04      | 748    | 3 | .8 | 1 | 20 | 566 | 585 | GGUU             | CGGA             | ation  | 1 |
| trf_4_1 | Bra037 |   | 22 |   |    |     |     | UCCGUUGUCGUCCAGC | AACCGCUGUCUGAUAA | Transl |   |
| 10      | 748    | 3 | .8 | 1 | 20 | 566 | 585 | GGUU             | CGGA             | ation  | 1 |
| trf_4_1 | Bra037 |   | 22 |   |    |     |     | UCCGUUGUCGUCCAGC | GUUGAAACCGCUGUCU | Transl |   |
| 11      | 748    | 3 | .8 | 1 | 25 | 561 | 585 | GGUUAGGAU        | GAUAACGGA        | ation  | 1 |
| trf_4_1 | Bra037 |   | 22 |   |    |     |     | UCCGUUGUCGUCCAGC | GUUGAAACCGCUGUCU | Transl |   |
| 69      | 748    | 3 | .8 | 1 | 25 | 561 | 585 | GGUUAGGAU        | GAUAACGGA        | ation  | 1 |
| trf_4_1 | Bra037 |   | 22 |   |    |     |     | UCCGUUGUCGUCCAGC | GUUGAAACCGCUGUCU | Transl |   |
| 70      | 748    | 3 | .8 | 1 | 25 | 561 | 585 | GGUUAGGAU        | GAUAACGGA        | ation  | 1 |
| trf_4_1 | Bra037 |   | 22 |   |    |     |     | UCCGUUGUCGUCCAGC | GUUGAAACCGCUGUCU | Transl |   |
| 72      | 748    | 3 | .8 | 1 | 25 | 561 | 585 | GGUUAGGAU        | GAUAACGGA        | ation  | 1 |

# tRF Pollinated Ovules

| ncRNA<br>_Acc. | Target<br>_Acc. | Expect<br>ation | U<br>PE | ncRNA<br>_start | ncRNA<br>_end | Target_<br>start | Target<br>_end | ncRNA_aligned_fragme<br>nt | Target_aligned_fragme<br>nt | Inhibit<br>ion | Multip<br>licity |
|----------------|-----------------|-----------------|---------|-----------------|---------------|------------------|----------------|----------------------------|-----------------------------|----------------|------------------|
|                | Bra014          |                 | 21      |                 |               |                  |                | GGUCCCAUGGUCUAGC           | AGCUGCUAGACCUUGG            | Cleava         |                  |
| trf_5_1        | 489             | 2               | .1      | 1               | 20            | 168              | 187            | GGUU                       | GACC                        | ge             | 1                |
|                | Bra007          |                 | 20      |                 |               |                  |                | GGUCCCAUGGUCUAGC           | GGCUGCUAGACCUUGG            | Cleava         |                  |
| trf_5_1        | 535             | 3               | .1      | 1               | 20            | 51               | 70             | GGUU                       | GAUC                        | ge             | 1                |
|                | Bra014          |                 | 21      |                 |               |                  |                | GGUCCCAUGGUCUAGC           | AGCUGCUAGACCUUGG            | Cleava         |                  |
| trf_5_2        | 489             | 2               | .1      | 1               | 20            | 168              | 187            | GGUU                       | GACC                        | ge             | 1                |
|                | Bra007          |                 | 20      |                 |               |                  |                | GGUCCCAUGGUCUAGC           | GGCUGCUAGACCUUGG            | Cleava         |                  |
| trf_5_2        | 535             | 3               | .1      | 1               | 20            | 51               | 70             | GGUU                       | GAUC                        | ge             | 1                |
|                | Bra000          |                 | 11      |                 |               |                  |                | UCCGUUAUCGUCCAGC           | UAACCGGAGGACGAUA            | Cleava         |                  |
| trf_5_3        | 529             | 2.5             | .2      | 1               | 21            | 984              | 1004           | GGUUA                      | AUGGA                       | ge             | 1                |
|                | Bra032          |                 | 22      |                 |               |                  |                | UCCGUUAUCGUCCAGC           | GACGGCUUGACGAUGA            | Cleava         |                  |
| trf_5_3        | 111             | 3               | .4      | 1               | 20            | 727              | 746            | GGUU                       | CGGA                        | ge             | 1                |
|                | Bra000          |                 | 11      |                 |               |                  |                | UCCGUUAUCGUCCAGC           | UAACCGGAGGACGAUA            | Cleava         |                  |
| trf_5_6        | 529             | 2.5             | .2      | 1               | 21            | 984              | 1004           | GGUUA                      | AUGGA                       | ge             | 1                |
|                | Bra032          |                 | 22      |                 |               |                  |                | UCCGUUAUCGUCCAGC           | GACGGCUUGACGAUGA            | Cleava         |                  |
| trf_5_6        | 111             | 3               | .4      | 1               | 20            | 727              | 746            | GGUU                       | CGGA                        | ge             | 1                |
|                | Bra000          |                 | 11      |                 |               |                  |                | UCCGUUAUCGUCCAGC           | UAACCGGAGGACGAUA            | Cleava         |                  |
| trf_5_7        | 529             | 2.5             | .2      | 1               | 21            | 984              | 1004           | GGUUA                      | AUGGA                       | ge             | 1                |
|                | Bra032          |                 | 22      |                 |               |                  |                | UCCGUUAUCGUCCAGC           | GACGGCUUGACGAUGA            | Cleava         |                  |
| trf_5_7        | 111             | 3               | .4      | 1               | 20            | 727              | 746            | GGUU                       | CGGA                        | ge             | 1                |
|                | Bra000          |                 | 11      |                 |               |                  |                | UCCGUUAUCGUCCAGC           | UAACCGGAGGACGAUA            | Cleava         |                  |
| trf_5_8        | 529             | 2.5             | .2      | 1               | 21            | 984              | 1004           | GGUUA                      | AUGGA                       | ge             | 1                |
|                | Bra032          |                 | 22      |                 |               |                  |                | UCCGUUAUCGUCCAGC           | GACGGCUUGACGAUGA            | Cleava         |                  |
| trf_5_8        | 111             | 3               | .4      | 1               | 20            | 727              | 746            | GGUU                       | CGGA                        | ge             | 1                |
|                | Bra000          |                 | 11      |                 |               |                  |                | UCCGUUAUCGUCCAGC           | AACCGGAGGACGAUAA            | Cleava         |                  |
| trf_5_9        | 529             | 2.5             | .2      | 1               | 20            | 985              | 1004           | GGUU                       | UGGA                        | ge             | 1                |
|                | Bra032          |                 | 22      |                 |               |                  |                | UCCGUUAUCGUCCAGC           | GACGGCUUGACGAUGA            | Cleava         |                  |
| trf_5_9        | 111             | 3               | .4      | 1               | 20            | 727              | 746            | GGUU                       | CGGA                        | ge             | 1                |
| trf_5_1        | Bra000          |                 | 11      |                 |               |                  |                | UCCGUUAUCGUCCAGC           | UAACCGGAGGACGAUA            | Cleava         |                  |
| 0              | 529             | 2.5             | .2      | 1               | 21            | 984              | 1004           | GGUUA                      | AUGGA                       | ge             | 1                |

|         |        |     |    |   |    |      |      |                  |                  |        |   |
|---------|--------|-----|----|---|----|------|------|------------------|------------------|--------|---|
| trf_5_1 | Bra032 | 22  |    |   |    |      |      | UCCGUUAUCGUCCAGC | GACGGCUUGACGAUGA | Cleava |   |
| 0       | 111    | 3   | .4 | 1 | 20 | 727  | 746  | GGUU             | CGGA             | ge     | 1 |
| trf_5_1 | Bra016 | 20  |    |   |    |      |      | UCCGUCGUAGUCUAGC | CUGAAGAAGCUAGGCU | Cleava |   |
| 1       | 601    | 3   | .8 | 1 | 24 | 415  | 438  | UGGUUAGG         | GCGACGGA         | ge     | 1 |
| trf_5_1 | Bra016 | 20  |    |   |    |      |      | UCCGUCGUAGUCUAGC | CUGAAGAAGCUAGGCU | Cleava |   |
| 3       | 601    | 3   | .8 | 1 | 24 | 415  | 438  | UGGUUAGG         | GCGACGGA         | ge     | 1 |
| trf_5_1 | Bra016 | 20  |    |   |    |      |      | UCCGUCGUAGUCUAGC | CUGAAGAAGCUAGGCU | Cleava |   |
| 4       | 601    | 3   | .8 | 1 | 24 | 415  | 438  | UGGUUAGG         | GCGACGGA         | ge     | 1 |
| trf_5_1 | Bra016 | 20  |    |   |    |      |      | UCCGUCGUAGUCUAGC | CUGAAGAAGCUAGGCU | Cleava |   |
| 5       | 601    | 3   | .8 | 1 | 24 | 415  | 438  | UGGUUAGG         | GCGACGGA         | ge     | 1 |
| trf_5_1 | Bra016 | 20  |    |   |    |      |      | UCCGUCGUAGUCUAGC | AAGAAGCUAGGCUGCG | Cleava |   |
| 6       | 601    | 3   | .8 | 1 | 21 | 418  | 438  | UGGUU            | ACGGA            | ge     | 1 |
| trf_5_1 | Bra016 | 20  |    |   |    |      |      | UCCGUCGUAGUCUAGC | AAGAAGCUAGGCUGCG | Cleava |   |
| 7       | 601    | 3   | .8 | 1 | 21 | 418  | 438  | UGGUU            | ACGGA            | ge     | 1 |
| trf_5_2 | Bra000 | 15  |    |   |    |      |      | GGUUCUAUGGUCUAGC | GACCGCUGGACCAGAG | Cleava |   |
| 6       | 719    | 3   | .3 | 1 | 20 | 1680 | 1699 | GGUU             | AACU             | ge     | 1 |
| trf_5_2 | Bra014 | 21  |    |   |    |      |      | GGUUCUAUGGUCUAGC | AGCUGCUAGACCUUGG | Cleava |   |
| 6       | 489    | 3   | .1 | 1 | 20 | 168  | 187  | GGUU             | GACC             | ge     | 1 |
| trf_5_2 | Bra013 | 22  |    |   |    |      |      | UCCGUUGUAGUCUAGC | CAUCAUCAGCUUGGCU | Cleava |   |
| 7       | 528    | 3   | .0 | 1 | 24 | 196  | 219  | UGGUCAGG         | AUAACGGG         | ge     | 1 |
| trf_5_4 | Bra007 | 14  |    |   |    |      |      | GCACCAGUGGUCUAGU | UUACUACUGGACCUUU | Cleava |   |
| 0       | 154    | 2.5 | .1 | 1 | 21 | 510  | 530  | GGUAG            | GGUGC            | ge     | 1 |
| trf_5_4 | Bra024 | 7.  |    |   |    |      |      | GGGGAUGUAGCUCAAA | UCCAACAUUUCGGUUA | Cleava |   |
| 1       | 638    | 3   | 5  | 1 | 23 | 203  | 225  | UGGUAGA          | CAUCCCC          | ge     | 1 |
| trf_5_4 | Bra025 | 17  |    |   |    |      |      | GGGGAUGUAGCUCAAA | ACAAUUUGAGCUUCAU | Cleava |   |
| 1       | 904    | 3   | .2 | 1 | 20 | 344  | 363  | UGGU             | CUUC             | ge     | 1 |
| trf_5_5 | Bra014 | 21  |    |   |    |      |      | GGUCCCAUGGUCUAGC | AGCUGCUAGACCUUGG | Cleava |   |
| 2       | 489    | 2   | .1 | 1 | 20 | 168  | 187  | GGUU             | GACC             | ge     | 1 |
| trf_5_5 | Bra007 | 20  |    |   |    |      |      | GGUCCCAUGGUCUAGC | GGCUGCUAGACCUUGG | Cleava |   |
| 2       | 535    | 3   | .1 | 1 | 20 | 51   | 70   | GGUU             | GAUC             | ge     | 1 |
| trf_5_5 | Bra014 | 21  |    |   |    |      |      | GGUCCCAUGGUCUAGC | AGCUGCUAGACCUUGG | Cleava |   |
| 3       | 489    | 2   | .1 | 1 | 20 | 168  | 187  | GGUU             | GACC             | ge     | 1 |
| trf_5_5 | Bra007 | 20  |    |   |    |      |      | GGUCCCAUGGUCUAGC | GGCUGCUAGACCUUGG | Cleava |   |
| 3       | 535    | 3   | .1 | 1 | 20 | 51   | 70   | GGUU             | GAUC             | ge     | 1 |



|         |        |    |    |   |    |      |      |                  |                   |        |   |
|---------|--------|----|----|---|----|------|------|------------------|-------------------|--------|---|
| trf_5_5 | Bra013 | 22 |    |   |    |      |      | UCCGUUGUAGUCUAGC | CAUCAUCAGCUUGGCU  | Cleava |   |
| 4       | 528    | 3  | .0 | 1 | 24 | 196  | 219  | UGGUCAGG         | AUAACGGG          | ge     | 1 |
| trf_5_5 | Bra013 | 22 |    |   |    |      |      | UCCGUUGUAGUCUAGC | CAUCAUCAGCUUGGCU  | Cleava |   |
| 5       | 528    | 3  | .0 | 1 | 24 | 196  | 219  | UGGUCAGG         | AUAACGGG          | ge     | 1 |
| trf_5_5 | Bra013 | 16 |    |   |    |      |      | UCCGUUGUCGUCCAGC | AACCGAUGGAUGUCA   | Cleava |   |
| 7       | 584    | 3  | .4 | 1 | 20 | 891  | 910  | GGUU             | UGGA              | ge     | 1 |
| trf_5_5 | Bra000 | 11 |    |   |    |      |      | UCCGUUGUCGUCCAGC | AACCGGAGGACGAUAA  | Cleava |   |
| 7       | 529    | 3  | .2 | 1 | 20 | 985  | 1004 | GGUU             | UGGA              | ge     | 1 |
| trf_5_5 | Bra013 | 16 |    |   |    |      |      | UCCGUUGUCGUCCAGC | UAUGAUAAACCGAUGGA | Cleava |   |
| 8       | 584    | 3  | .4 | 1 | 26 | 885  | 910  | GGUUAGGAUA       | UGUCAAUUGGA       | ge     | 1 |
| trf_5_5 | Bra000 | 11 |    |   |    |      |      | UCCGUUGUCGUCCAGC | UAACCGGAGGACGAUA  | Cleava |   |
| 8       | 529    | 3  | .2 | 1 | 21 | 984  | 1004 | GGUUA            | AUGGA             | ge     | 1 |
| trf_5_6 | Bra013 | 16 |    |   |    |      |      | UCCGUUGUCGUCCAGC | AUGAUAAACCGAUGGAU | Cleava |   |
| 0       | 584    | 3  | .4 | 1 | 25 | 886  | 910  | GGUUAGGAU        | GUCAAUGGA         | ge     | 1 |
| trf_5_6 | Bra000 | 11 |    |   |    |      |      | UCCGUUGUCGUCCAGC | UAACCGGAGGACGAUA  | Cleava |   |
| 0       | 529    | 3  | .2 | 1 | 21 | 984  | 1004 | GGUUA            | AUGGA             | ge     | 1 |
| trf_5_7 | Bra019 | 12 |    |   |    |      |      | GACGGUUUGGCCGAGU | UGAGACUACUUGGUCC  | Cleava |   |
| 8       | 760    | 3  | .5 | 1 | 23 | 1328 | 1350 | GGUCUAA          | AGCCGUC           | ge     | 1 |
| trf_5_7 | Bra000 | 16 |    |   |    |      |      | GACGGUUUGGCCGAGU | AACCAUUCGCCCCAAU  | Cleava |   |
| 8       | 788    | 3  | .6 | 1 | 20 | 52   | 71   | GGUC             | GUC               | ge     | 1 |
| trf_5_7 | Bra003 | 24 |    |   |    |      |      | GACGGUUUGGCCGAGU | GGCGAUUCGGCCCCAAU | Cleava |   |
| 8       | 534    | 3  | .7 | 1 | 20 | 3589 | 3608 | GGUC             | UGUC              | ge     | 1 |
| trf_5_7 | Bra002 | 10 |    |   |    |      |      | GACGGUUUGGCCGAGU | GACUUUCGGCCCCAAC  | Cleava |   |
| 8       | 609    | 3  | .2 | 1 | 20 | 1237 | 1256 | GGUC             | CGUC              | ge     | 1 |
| trf_5_7 | Bra014 | 21 |    |   |    |      |      | GGUCCCAUGGUCUAGC | AGCUGCUAGACCUUGG  | Cleava |   |
| 9       | 489    | 2  | .1 | 1 | 20 | 168  | 187  | GGUU             | GACC              | ge     | 1 |
| trf_5_7 | Bra007 | 20 |    |   |    |      |      | GGUCCCAUGGUCUAGC | GGCUGCUAGACCUUGG  | Cleava |   |
| 9       | 535    | 3  | .1 | 1 | 20 | 51   | 70   | GGUU             | GAUC              | ge     | 1 |
| trf_5_8 | Bra014 | 21 |    |   |    |      |      | GGUCCCAUGGUCUAGC | AGCUGCUAGACCUUGG  | Cleava |   |
| 0       | 489    | 2  | .1 | 1 | 20 | 168  | 187  | GGUU             | GACC              | ge     | 1 |
| trf_5_8 | Bra007 | 20 |    |   |    |      |      | GGUCCCAUGGUCUAGC | GGCUGCUAGACCUUGG  | Cleava |   |
| 0       | 535    | 3  | .1 | 1 | 20 | 51   | 70   | GGUU             | GAUC              | ge     | 1 |
| trf_5_8 | Bra013 | 22 |    |   |    |      |      | UCCGUUGUAGUCUAGC | CAUCAUCAGCUUGGCU  | Cleava |   |
| 2       | 528    | 3  | .0 | 1 | 24 | 196  | 219  | UGGUCAGG         | AUAACGGG          | ge     | 1 |

|         |        |     |    |   |    |      |      |                  |                  |        |   |
|---------|--------|-----|----|---|----|------|------|------------------|------------------|--------|---|
| trf_5_8 | Bra000 | 15  |    |   |    |      |      | GGUUCUAUGGUCUAGC | GACCGCUGGACCAGAG | Cleava |   |
| 4       | 719    | 3   | .3 | 1 | 20 | 1680 | 1699 | GGUU             | AACU             | ge     | 1 |
| trf_5_8 | Bra014 | 21  |    |   |    |      |      | GGUUCUAUGGUCUAGC | AGCUGCUAGACCUUGG | Cleava |   |
| 4       | 489    | 3   | .1 | 1 | 20 | 168  | 187  | GGUU             | GACC             | ge     | 1 |
| trf_5_8 | Bra000 | 15  |    |   |    |      |      | GGUUCUAUGGUCUAGC | GACCGCUGGACCAGAG | Cleava |   |
| 5       | 719    | 3   | .3 | 1 | 20 | 1680 | 1699 | GGUU             | AACU             | ge     | 1 |
| trf_5_8 | Bra014 | 21  |    |   |    |      |      | GGUUCUAUGGUCUAGC | AGCUGCUAGACCUUGG | Cleava |   |
| 5       | 489    | 3   | .1 | 1 | 20 | 168  | 187  | GGUU             | GACC             | ge     | 1 |
| trf_5_9 | Bra013 | 22  |    |   |    |      |      | UCCGUUGUAGUCUAGC | CAUCAUCAGCUUGGCU | Cleava |   |
| 7       | 528    | 3   | .0 | 1 | 24 | 196  | 219  | UGGUCAGG         | AUAACGGG         | ge     | 1 |
| trf_5_1 | Bra002 | 16  |    |   |    |      |      | AGGGAUAUAACUCAGC | CUGCUGCUGAGUUCUA | Cleava |   |
| 10      | 746    | 3   | .3 | 1 | 21 | 218  | 238  | GGUAG            | UCCCA            | ge     | 1 |
| trf_5_1 | Bra012 | 14  |    |   |    |      |      | AGGGAUAUAACUCAGC | UACCUUUGAGUUAUG  | Cleava |   |
| 10      | 734    | 3   | .1 | 1 | 20 | 1709 | 1728 | GGUA             | UUUCU            | ge     | 1 |
| trf_5_1 | Bra000 | 15  |    |   |    |      |      | GGUUCUAUGGUCUAGC | GACCGCUGGACCAGAG | Cleava |   |
| 16      | 719    | 3   | .3 | 1 | 20 | 1680 | 1699 | GGUU             | AACU             | ge     | 1 |
| trf_5_1 | Bra014 | 21  |    |   |    |      |      | GGUUCUAUGGUCUAGC | AGCUGCUAGACCUUGG | Cleava |   |
| 16      | 489    | 3   | .1 | 1 | 20 | 168  | 187  | GGUU             | GACC             | ge     | 1 |
| trf_5_1 | Bra013 | 18  |    |   |    |      |      | GGGUCGAUGCCCGAGC | UAACCGAUCGGGCCUC | Cleava |   |
| 17      | 150    | 2.5 | .5 | 1 | 21 | 93   | 113  | GGUUA            | GAUCC            | ge     | 1 |
| trf_5_1 | Bra000 | 11  |    |   |    |      |      | UCCGUUAUCGUCCAGC | UAACCGGAGGACGAUA | Cleava |   |
| 19      | 529    | 2.5 | .2 | 1 | 21 | 984  | 1004 | GGUUA            | AUGGA            | ge     | 1 |
| trf_5_1 | Bra032 | 22  |    |   |    |      |      | UCCGUUAUCGUCCAGC | GACGGCUUGACGAUGA | Cleava |   |
| 19      | 111    | 3   | .4 | 1 | 20 | 727  | 746  | GGUU             | CGGA             | ge     | 1 |
| trf_5_1 | Bra000 | 11  |    |   |    |      |      | UCCGUUAUCGUCCAGC | UAACCGGAGGACGAUA | Cleava |   |
| 21      | 529    | 2.5 | .2 | 1 | 21 | 984  | 1004 | GGUUA            | AUGGA            | ge     | 1 |
| trf_5_1 | Bra032 | 22  |    |   |    |      |      | UCCGUUAUCGUCCAGC | GACGGCUUGACGAUGA | Cleava |   |
| 21      | 111    | 3   | .4 | 1 | 20 | 727  | 746  | GGUU             | CGGA             | ge     | 1 |
| trf_5_1 | Bra000 | 11  |    |   |    |      |      | UCCGUUAUCGUCCAGC | AACCGGAGGACGAUAA | Cleava |   |
| 22      | 529    | 2.5 | .2 | 1 | 20 | 985  | 1004 | GGUU             | UGGA             | ge     | 1 |
| trf_5_1 | Bra032 | 22  |    |   |    |      |      | UCCGUUAUCGUCCAGC | GACGGCUUGACGAUGA | Cleava |   |
| 22      | 111    | 3   | .4 | 1 | 20 | 727  | 746  | GGUU             | CGGA             | ge     | 1 |
| trf_5_1 | Bra000 | 11  |    |   |    |      |      | UCCGUUAUCGUCCAGC | UAACCGGAGGACGAUA | Cleava |   |
| 24      | 529    | 2.5 | .2 | 1 | 21 | 984  | 1004 | GGUUA            | AUGGA            | ge     | 1 |

|         |        |     |    |   |    |     |      |                  |                  |        |   |
|---------|--------|-----|----|---|----|-----|------|------------------|------------------|--------|---|
| trf_5_1 | Bra032 | 22  |    |   |    |     |      | UCCGUUAUCGUCCAGC | GACGGCUUGACGAUGA | Cleava |   |
| 24      | 111    | 3   | .4 | 1 | 20 | 727 | 746  | GGUU             | CGGA             | ge     | 1 |
| trf_5_1 | Bra000 | 11  |    |   |    |     |      | UCCGUUAUCGUCCAGC | UAACCGGAGGACGAUA | Cleava |   |
| 25      | 529    | 2.5 | .2 | 1 | 21 | 984 | 1004 | GGUUA            | AUGGA            | ge     | 1 |
| trf_5_1 | Bra032 | 22  |    |   |    |     |      | UCCGUUAUCGUCCAGC | GACGGCUUGACGAUGA | Cleava |   |
| 25      | 111    | 3   | .4 | 1 | 20 | 727 | 746  | GGUU             | CGGA             | ge     | 1 |
| trf_5_1 | Bra000 | 11  |    |   |    |     |      | UCCGUUAUCGUCCAGC | UAACCGGAGGACGAUA | Cleava |   |
| 26      | 529    | 2.5 | .2 | 1 | 21 | 984 | 1004 | GGUUA            | AUGGA            | ge     | 1 |
| trf_5_1 | Bra032 | 22  |    |   |    |     |      | UCCGUUAUCGUCCAGC | GACGGCUUGACGAUGA | Cleava |   |
| 26      | 111    | 3   | .4 | 1 | 20 | 727 | 746  | GGUU             | CGGA             | ge     | 1 |
| trf_5_1 | Bra013 | 16  |    |   |    |     |      | UCCGUUGUCGUCCAGC | UAACCGAUGGAUGUCA | Cleava |   |
| 46      | 584    | 3   | .4 | 1 | 21 | 890 | 910  | GGUUA            | AUGGA            | ge     | 1 |
| trf_5_1 | Bra000 | 11  |    |   |    |     |      | UCCGUUGUCGUCCAGC | UAACCGGAGGACGAUA | Cleava |   |
| 46      | 529    | 3   | .2 | 1 | 21 | 984 | 1004 | GGUUA            | AUGGA            | ge     | 1 |
| trf_5_1 | Bra013 | 16  |    |   |    |     |      | UCCGUUGUCGUCCAGC | UAUGAUAACCGAUGGA | Cleava |   |
| 49      | 584    | 3   | .4 | 1 | 26 | 885 | 910  | GGUUAGGAUA       | UGUCA AUGGA      | ge     | 1 |
| trf_5_1 | Bra000 | 11  |    |   |    |     |      | UCCGUUGUCGUCCAGC | UAACCGGAGGACGAUA | Cleava |   |
| 49      | 529    | 3   | .2 | 1 | 21 | 984 | 1004 | GGUUA            | AUGGA            | ge     | 1 |
| trf_5_1 | Bra013 | 16  |    |   |    |     |      | UCCGUUGUCGUCCAGC | AUGAUAACCGAUGGAU | Cleava |   |
| 50      | 584    | 3   | .4 | 1 | 25 | 886 | 910  | GGUUAGGAU        | GUCAAUGGA        | ge     | 1 |
| trf_5_1 | Bra000 | 11  |    |   |    |     |      | UCCGUUGUCGUCCAGC | UAACCGGAGGACGAUA | Cleava |   |
| 50      | 529    | 3   | .2 | 1 | 21 | 984 | 1004 | GGUUA            | AUGGA            | ge     | 1 |
| trf_5_1 | Bra013 | 16  |    |   |    |     |      | UCCGUUGUCGUCCAGC | UAACCGAUGGAUGUCA | Cleava |   |
| 54      | 584    | 3   | .4 | 1 | 21 | 890 | 910  | GGUUA            | AUGGA            | ge     | 1 |
| trf_5_1 | Bra000 | 11  |    |   |    |     |      | UCCGUUGUCGUCCAGC | UAACCGGAGGACGAUA | Cleava |   |
| 54      | 529    | 3   | .2 | 1 | 21 | 984 | 1004 | GGUUA            | AUGGA            | ge     | 1 |
| trf_5_1 | Bra013 | 16  |    |   |    |     |      | UCCGUUGUCGUCCAGC | UAACCGAUGGAUGUCA | Cleava |   |
| 55      | 584    | 3   | .4 | 1 | 21 | 890 | 910  | GGUUA            | AUGGA            | ge     | 1 |
| trf_5_1 | Bra000 | 11  |    |   |    |     |      | UCCGUUGUCGUCCAGC | UAACCGGAGGACGAUA | Cleava |   |
| 55      | 529    | 3   | .2 | 1 | 21 | 984 | 1004 | GGUUA            | AUGGA            | ge     | 1 |
| trf_5_1 | Bra013 | 16  |    |   |    |     |      | UCCGUUGUCGUCCAGC | AUGAUAACCGAUGGAU | Cleava |   |
| 58      | 584    | 3   | .4 | 1 | 25 | 886 | 910  | GGUUAGGAU        | GUCAAUGGA        | ge     | 1 |
| trf_5_1 | Bra000 | 11  |    |   |    |     |      | UCCGUUGUCGUCCAGC | UAACCGGAGGACGAUA | Cleava |   |
| 58      | 529    | 3   | .2 | 1 | 21 | 984 | 1004 | GGUUA            | AUGGA            | ge     | 1 |

|         |        |     |    |   |    |      |      |                  |                   |        |   |
|---------|--------|-----|----|---|----|------|------|------------------|-------------------|--------|---|
| trf_5_1 | Bra013 | 16  |    |   |    |      |      | UCCGUUGUCGUCCAGC | AACCGAUGGAUGUCA   | Cleava |   |
| 59      | 584    | 3   | .4 | 1 | 20 | 891  | 910  | GGUU             | UGGA              | ge     | 1 |
| trf_5_1 | Bra000 | 11  |    |   |    |      |      | UCCGUUGUCGUCCAGC | AACCGGAGGACGAUAA  | Cleava |   |
| 59      | 529    | 3   | .2 | 1 | 20 | 985  | 1004 | GGUU             | UGGA              | ge     | 1 |
| trf_5_1 | Bra016 | 20  |    |   |    |      |      | UCCGUCGUAGUCUAGC | CUGAAGAAGCUAGGCU  | Cleava |   |
| 60      | 601    | 3   | .8 | 1 | 24 | 415  | 438  | UGGUUAGG         | GCGACGGA          | ge     | 1 |
| trf_5_1 | Bra016 | 20  |    |   |    |      |      | UCCGUCGUAGUCUAGC | CUGAAGAAGCUAGGCU  | Cleava |   |
| 61      | 601    | 3   | .8 | 1 | 24 | 415  | 438  | UGGUUAGG         | GCGACGGA          | ge     | 1 |
| trf_5_1 | Bra016 | 20  |    |   |    |      |      | UCCGUCGUAGUCUAGC | AAGAAGCUAGGCUGCG  | Cleava |   |
| 62      | 601    | 3   | .8 | 1 | 21 | 418  | 438  | UGGUU            | ACGGA             | ge     | 1 |
| trf_5_1 | Bra009 | 14  |    |   |    |      |      | GGGGAUGUAGCUCAGA | UUAUCAUCUGGGCUUC  | Cleava |   |
| 69      | 876    | 3   | .9 | 1 | 22 | 16   | 37   | UGGUAG           | GUCCUC            | ge     | 1 |
| trf_5_1 | Bra016 | 10  |    |   |    |      |      | GGGGAUGUAGCUCAGA | UUAUCAUCUGAGCUUC  | Cleava |   |
| 69      | 141    | 3   | .4 | 1 | 22 | 3031 | 3052 | UGGUAG           | GUUCUC            | ge     | 1 |
| trf_5_1 | Bra036 | 20  |    |   |    |      |      | GGGGAUGUAGCUCAGA | UCGACUGGCUGAGCUA  | Cleava |   |
| 69      | 771    | 3   | .2 | 1 | 23 | 5375 | 5397 | UGGUAGA          | CAUUCU            | ge     | 1 |
| trf_5_1 | Bra018 | 8.  |    |   |    |      |      | GGGGAUGUAGCUCAGA | GCCACCUCAGCUACAUC | Cleava |   |
| 69      | 620    | 3   | 3  | 1 | 20 | 7    | 26   | UGGU             | CUC               | ge     | 1 |
| trf_5_1 | Bra000 | 15  |    |   |    |      |      | GGUUCUAUGGUCUAGC | GACCGCUGGACCAGAG  | Cleava |   |
| 82      | 719    | 3   | .3 | 1 | 20 | 1680 | 1699 | GGUU             | AACU              | ge     | 1 |
| trf_5_1 | Bra014 | 21  |    |   |    |      |      | GGUUCUAUGGUCUAGC | AGCUGCUAGACCUUGG  | Cleava |   |
| 82      | 489    | 3   | .1 | 1 | 20 | 168  | 187  | GGUU             | GACC              | ge     | 1 |
| trf_5_1 | Bra007 | 14  |    |   |    |      |      | GCACCAGUGGUCUAGU | UUACUACUGGACCUUU  | Cleava |   |
| 83      | 154    | 2.5 | .1 | 1 | 21 | 510  | 530  | GGUAG            | GGUGC             | ge     | 1 |
| trf_5_1 | Bra003 | 16  |    |   |    |      |      | GGGAUUGUAGUUCAA  | ACCAGUUGAAUUACAA  | Cleava |   |
| 85      | 753    | 1.5 | .2 | 1 | 20 | 284  | 303  | UUGGU            | UCCU              | ge     | 1 |
| trf_5_1 | Bra013 | 19  |    |   |    |      |      | GGGAUUGUAGUUCAA  | ACUAAUUGAACUAAGA  | Cleava |   |
| 85      | 336    | 3   | .5 | 1 | 20 | 267  | 286  | UUGGU            | UCUC              | ge     | 1 |
| trf_5_1 | Bra021 | 23  |    |   |    |      |      | GGGAUUGUAGUUCAA  | ACCAACUGAACUGCAA  | Cleava |   |
| 85      | 314    | 3   | .2 | 1 | 20 | 234  | 253  | UUGGU            | UCUG              | ge     | 1 |
| trf_5_1 | Bra003 | 16  |    |   |    |      |      | GGGAUUGUAGUUCAA  | ACCAGUUGAAUUACAA  | Cleava |   |
| 86      | 753    | 1.5 | .2 | 1 | 20 | 284  | 303  | UUGGU            | UCCU              | ge     | 1 |
| trf_5_1 | Bra013 | 19  |    |   |    |      |      | GGGAUUGUAGUUCAA  | ACUAAUUGAACUAAGA  | Cleava |   |
| 86      | 336    | 3   | .5 | 1 | 20 | 267  | 286  | UUGGU            | UCUC              | ge     | 1 |

|         |        |     |    |   |    |     |     |                 |                  |        |   |
|---------|--------|-----|----|---|----|-----|-----|-----------------|------------------|--------|---|
| trf_5_1 | Bra021 | 23  |    |   |    |     |     | GGGAUUGUAGUUCAA | ACCAACUGAACUGCAA | Cleava |   |
| 86      | 314    | 3   | .2 | 1 | 20 | 234 | 253 | UUGGU           | UCUG             | ge     | 1 |
| trf_5_1 | Bra003 | 16  |    |   |    |     |     | GGGAUUGUAGUUCAA | ACCAGUUGAAUUACAA | Cleava |   |
| 87      | 753    | 1.5 | .2 | 1 | 20 | 284 | 303 | UUGGU           | UCCU             | ge     | 1 |
| trf_5_1 | Bra013 | 19  |    |   |    |     |     | GGGAUUGUAGUUCAA | ACUAAUUGAACUAAGA | Cleava |   |
| 87      | 336    | 3   | .5 | 1 | 20 | 267 | 286 | UUGGU           | UCUC             | ge     | 1 |
| trf_5_1 | Bra021 | 23  |    |   |    |     |     | GGGAUUGUAGUUCAA | ACCAACUGAACUGCAA | Cleava |   |
| 87      | 314    | 3   | .2 | 1 | 20 | 234 | 253 | UUGGU           | UCUG             | ge     | 1 |
| trf_5_1 | Bra003 | 16  |    |   |    |     |     | GGGAUUGUAGUUCAA | ACCAGUUGAAUUACAA | Cleava |   |
| 89      | 753    | 2.5 | .2 | 1 | 20 | 284 | 303 | UCGGU           | UCCU             | ge     | 1 |
| trf_5_1 | Bra003 | 16  |    |   |    |     |     | GGGAUUGUAGUUCAA | ACCAGUUGAAUUACAA | Cleava |   |
| 90      | 753    | 1.5 | .2 | 1 | 20 | 284 | 303 | UUGGU           | UCCU             | ge     | 1 |
| trf_5_1 | Bra013 | 19  |    |   |    |     |     | GGGAUUGUAGUUCAA | ACUAAUUGAACUAAGA | Cleava |   |
| 90      | 336    | 3   | .5 | 1 | 20 | 267 | 286 | UUGGU           | UCUC             | ge     | 1 |
| trf_5_1 | Bra021 | 23  |    |   |    |     |     | GGGAUUGUAGUUCAA | ACCAACUGAACUGCAA | Cleava |   |
| 90      | 314    | 3   | .2 | 1 | 20 | 234 | 253 | UUGGU           | UCUG             | ge     | 1 |
| trf_5_1 | Bra003 | 16  |    |   |    |     |     | GGGAUUGUAGUUCAA | ACCAGUUGAAUUACAA | Cleava |   |
| 92      | 753    | 1.5 | .2 | 1 | 20 | 284 | 303 | UUGGU           | UCCU             | ge     | 1 |
| trf_5_1 | Bra013 | 19  |    |   |    |     |     | GGGAUUGUAGUUCAA | ACUAAUUGAACUAAGA | Cleava |   |
| 92      | 336    | 3   | .5 | 1 | 20 | 267 | 286 | UUGGU           | UCUC             | ge     | 1 |
| trf_5_1 | Bra021 | 23  |    |   |    |     |     | GGGAUUGUAGUUCAA | ACCAACUGAACUGCAA | Cleava |   |
| 92      | 314    | 3   | .2 | 1 | 20 | 234 | 253 | UUGGU           | UCUG             | ge     | 1 |
| trf_5_1 | Bra003 | 16  |    |   |    |     |     | GGGAUUGUAGUUCAA | ACCAGUUGAAUUACAA | Cleava |   |
| 93      | 753    | 2.5 | .2 | 1 | 20 | 284 | 303 | UCGGU           | UCCU             | ge     | 1 |
| trf_5_1 | Bra003 | 16  |    |   |    |     |     | GGGAUUGUAGUUCAA | ACCAGUUGAAUUACAA | Cleava |   |
| 95      | 753    | 1.5 | .2 | 1 | 20 | 284 | 303 | UUGGU           | UCCU             | ge     | 1 |
| trf_5_1 | Bra013 | 19  |    |   |    |     |     | GGGAUUGUAGUUCAA | ACUAAUUGAACUAAGA | Cleava |   |
| 95      | 336    | 3   | .5 | 1 | 20 | 267 | 286 | UUGGU           | UCUC             | ge     | 1 |
| trf_5_1 | Bra021 | 23  |    |   |    |     |     | GGGAUUGUAGUUCAA | ACCAACUGAACUGCAA | Cleava |   |
| 95      | 314    | 3   | .2 | 1 | 20 | 234 | 253 | UUGGU           | UCUG             | ge     | 1 |
| trf_5_1 | Bra003 | 16  |    |   |    |     |     | GGGAUUGUAGUUCAA | ACCAGUUGAAUUACAA | Cleava |   |
| 96      | 753    | 1.5 | .2 | 1 | 20 | 284 | 303 | UUGGU           | UCCU             | ge     | 1 |
| trf_5_1 | Bra013 | 19  |    |   |    |     |     | GGGAUUGUAGUUCAA | ACUAAUUGAACUAAGA | Cleava |   |
| 96      | 336    | 3   | .5 | 1 | 20 | 267 | 286 | UUGGU           | UCUC             | ge     | 1 |

|         |        |     |    |   |    |      |      |                  |                  |        |   |
|---------|--------|-----|----|---|----|------|------|------------------|------------------|--------|---|
| trf_5_1 | Bra021 | 23  |    |   |    |      |      | GGGAUUGUAGUUCAA  | ACCAACUGAACUGCAA | Cleava |   |
| 96      | 314    | 3   | .2 | 1 | 20 | 234  | 253  | UUGGU            | UCUG             | ge     | 1 |
| trf_5_1 | Bra003 | 16  |    |   |    |      |      | GGGAUUGUAGUUCAA  | ACCAGUUGAAUUACAA | Cleava |   |
| 97      | 753    | 1.5 | .2 | 1 | 20 | 284  | 303  | UUGGU            | UCCU             | ge     | 1 |
| trf_5_1 | Bra013 | 19  |    |   |    |      |      | GGGAUUGUAGUUCAA  | ACUAAUUGAACUAAGA | Cleava |   |
| 97      | 336    | 3   | .5 | 1 | 20 | 267  | 286  | UUGGU            | UCUC             | ge     | 1 |
| trf_5_1 | Bra021 | 23  |    |   |    |      |      | GGGAUUGUAGUUCAA  | ACCAACUGAACUGCAA | Cleava |   |
| 97      | 314    | 3   | .2 | 1 | 20 | 234  | 253  | UUGGU            | UCUG             | ge     | 1 |
| trf_5_1 | Bra003 | 16  |    |   |    |      |      | GGGAUUGUAGUUCAA  | ACCAGUUGAAUUACAA | Cleava |   |
| 98      | 753    | 2.5 | .2 | 1 | 20 | 284  | 303  | UUGGC            | UCCU             | ge     | 1 |
| trf_5_1 | Bra003 | 16  |    |   |    |      |      | GGGAUUGUAGUUCAA  | ACCAGUUGAAUUACAA | Cleava |   |
| 99      | 753    | 2.5 | .2 | 1 | 20 | 284  | 303  | UUGGC            | UCCU             | ge     | 1 |
| trf_5_2 | Bra003 | 16  |    |   |    |      |      | GGGAUUGUAGUUCAA  | AACCAGUUGAAUUACA | Cleava |   |
| 00      | 753    | 2.5 | .2 | 1 | 21 | 283  | 303  | UUGGCU           | AUCCU            | ge     | 1 |
| trf_5_2 | Bra003 | 16  |    |   |    |      |      | GGGAUUGUAGUUCAA  | ACCAGUUGAAUUACAA | Cleava |   |
| 01      | 753    | 2.5 | .2 | 1 | 20 | 284  | 303  | UUGGC            | UCCU             | ge     | 1 |
| trf_5_2 | Bra003 | 16  |    |   |    |      |      | GGGAUUGUAGUUCAA  | ACCAGUUGAAUUACAA | Cleava |   |
| 02      | 753    | 2.5 | .2 | 1 | 20 | 284  | 303  | UUGGA            | UCCU             | ge     | 1 |
| trf_5_2 | Bra003 | 16  |    |   |    |      |      | GGGAUUGUAGUUCAA  | ACCAGUUGAAUUACAA | Cleava |   |
| 03      | 753    | 2.5 | .2 | 1 | 20 | 284  | 303  | UUGGG            | UCCU             | ge     | 1 |
| trf_5_2 | Bra009 | 15  |    |   |    |      |      | GGGAUUGUAGUUCAA  | CUCAGUUGAACUUCAA | Cleava |   |
| 03      | 115    | 3   | .2 | 1 | 20 | 602  | 621  | UUGGG            | UCCA             | ge     | 1 |
| trf_5_2 | Bra003 | 16  |    |   |    |      |      | GGGAUUGUAGUUCAA  | ACCAGUUGAAUUACAA | Cleava |   |
| 05      | 753    | 2.5 | .2 | 1 | 20 | 284  | 303  | UUGGG            | UCCU             | ge     | 1 |
| trf_5_2 | Bra009 | 15  |    |   |    |      |      | GGGAUUGUAGUUCAA  | CUCAGUUGAACUUCAA | Cleava |   |
| 05      | 115    | 3   | .2 | 1 | 20 | 602  | 621  | UUGGG            | UCCA             | ge     | 1 |
| trf_5_2 | Bra000 | 15  |    |   |    |      |      | GGUUCUAUGGUCUAGC | GACCGCUGGACCAGAG | Cleava |   |
| 10      | 719    | 3   | .3 | 1 | 20 | 1680 | 1699 | GGUU             | AACU             | ge     | 1 |
| trf_5_2 | Bra014 | 21  |    |   |    |      |      | GGUUCUAUGGUCUAGC | AGCUGCUAGACCUUGG | Cleava |   |
| 10      | 489    | 3   | .1 | 1 | 20 | 168  | 187  | GGUU             | GACC             | ge     | 1 |
| trf_5_2 | Bra000 | 15  |    |   |    |      |      | GGUUCUAUGGUCUAGC | GACCGCUGGACCAGAG | Cleava |   |
| 11      | 719    | 3   | .3 | 1 | 20 | 1680 | 1699 | GGUU             | AACU             | ge     | 1 |
| trf_5_2 | Bra014 | 21  |    |   |    |      |      | GGUUCUAUGGUCUAGC | AGCUGCUAGACCUUGG | Cleava |   |
| 11      | 489    | 3   | .1 | 1 | 20 | 168  | 187  | GGUU             | GACC             | ge     | 1 |

|         |        |    |    |   |    |      |      |                  |                   |        |   |
|---------|--------|----|----|---|----|------|------|------------------|-------------------|--------|---|
| trf_5_2 | Bra013 | 16 |    |   |    |      |      | UCCGUUGUCGUCCAGC | AUGAUAAACCGAUGGAU | Cleava |   |
| 17      | 584    | 3  | .4 | 1 | 25 | 886  | 910  | GGUUAGGAU        | GUCAAUGGA         | ge     | 1 |
| trf_5_2 | Bra000 | 11 |    |   |    |      |      | UCCGUUGUCGUCCAGC | UAACCGGAGGACGAUA  | Cleava |   |
| 17      | 529    | 3  | .2 | 1 | 21 | 984  | 1004 | GGUUA            | AUGGA             | ge     | 1 |
| trf_5_2 | Bra013 | 16 |    |   |    |      |      | UCCGUUGUCGUCCAGC | UAACCGAUGGAUGUCA  | Cleava |   |
| 20      | 584    | 3  | .4 | 1 | 21 | 890  | 910  | GGUUA            | AUGGA             | ge     | 1 |
| trf_5_2 | Bra000 | 11 |    |   |    |      |      | UCCGUUGUCGUCCAGC | UAACCGGAGGACGAUA  | Cleava |   |
| 20      | 529    | 3  | .2 | 1 | 21 | 984  | 1004 | GGUUA            | AUGGA             | ge     | 1 |
| trf_5_2 | Bra013 | 16 |    |   |    |      |      | UCCGUUGUCGUCCAGC | UAUGAUAAACCGAUGGA | Cleava |   |
| 21      | 584    | 3  | .4 | 1 | 26 | 885  | 910  | GGUUAGGAUA       | UGUCAAUUGGA       | ge     | 1 |
| trf_5_2 | Bra000 | 11 |    |   |    |      |      | UCCGUUGUCGUCCAGC | UAACCGGAGGACGAUA  | Cleava |   |
| 21      | 529    | 3  | .2 | 1 | 21 | 984  | 1004 | GGUUA            | AUGGA             | ge     | 1 |
| trf_5_2 | Bra016 | 20 |    |   |    |      |      | UCCGUCGUAGUCUAGC | CUGAAGAAGCUAGGCU  | Cleava |   |
| 23      | 601    | 3  | .8 | 1 | 24 | 415  | 438  | UGGUUAGG         | GCGACGGA          | ge     | 1 |
| trf_5_2 | Bra016 | 20 |    |   |    |      |      | UCCGUCGUAGUCUAGC | CUGAAGAAGCUAGGCU  | Cleava |   |
| 24      | 601    | 3  | .8 | 1 | 24 | 415  | 438  | UGGUUAGG         | GCGACGGA          | ge     | 1 |
| trf_5_2 | Bra016 | 20 |    |   |    |      |      | UCCGUCGUAGUCUAGC | AAGAAGCUAGGCUGCG  | Cleava |   |
| 25      | 601    | 3  | .8 | 1 | 21 | 418  | 438  | UGGUU            | ACGGA             | ge     | 1 |
| trf_5_2 | Bra016 | 20 |    |   |    |      |      | UCCGUCGUAGUCUAGC | CUGAAGAAGCUAGGCU  | Cleava |   |
| 27      | 601    | 3  | .8 | 1 | 24 | 415  | 438  | UGGUUAGG         | GCGACGGA          | ge     | 1 |
| trf_5_2 | Bra024 | 7. |    |   |    |      |      | GGGGAUGUAGCUCAAA | UCCAACAUUUCGGUUA  | Cleava |   |
| 28      | 638    | 3  | 5  | 1 | 23 | 203  | 225  | UGGUAGA          | CAUCCCC           | ge     | 1 |
| trf_5_2 | Bra025 | 17 |    |   |    |      |      | GGGGAUGUAGCUCAAA | ACAAUUUGAGCUUCAU  | Cleava |   |
| 28      | 904    | 3  | .2 | 1 | 20 | 344  | 363  | UGGU             | CUUC              | ge     | 1 |
| trf_5_2 | Bra016 | 20 |    |   |    |      |      | UCCGUCGUAGUCUAGC | CUGAAGAAGCUAGGCU  | Cleava |   |
| 29      | 601    | 3  | .8 | 1 | 24 | 415  | 438  | UGGUUAGG         | GCGACGGA          | ge     | 1 |
| trf_5_2 | Bra016 | 20 |    |   |    |      |      | UCCGUCGUAGUCUAGC | AAGAAGCUAGGCUGCG  | Cleava |   |
| 30      | 601    | 3  | .8 | 1 | 21 | 418  | 438  | UGGUU            | ACGGA             | ge     | 1 |
| trf_5_2 | Bra016 | 20 |    |   |    |      |      | UCCGUCGUAGUCUAGC | CUGAAGAAGCUAGGCU  | Cleava |   |
| 31      | 601    | 3  | .8 | 1 | 24 | 415  | 438  | UGGUUAGG         | GCGACGGA          | ge     | 1 |
| trf_5_2 | Bra029 | 20 |    |   |    |      |      | GCUGGAGUAGCUCAGU | GUCAGCUGAGCUACUC  | Cleava |   |
| 40      | 975    | 3  | .8 | 1 | 20 | 1245 | 1264 | UGGU             | AAGC              | ge     | 1 |
| trf_5_2 | Bra003 | 16 |    |   |    |      |      | GCUGGAGUAGCUCAGU | CCUAACGGAGCUGCUC  | Cleava |   |
| 40      | 013    | 3  | .5 | 1 | 20 | 319  | 338  | UGGU             | CAGC              | ge     | 1 |

|         |        |     |    |   |    |      |      |                  |                  |             |  |
|---------|--------|-----|----|---|----|------|------|------------------|------------------|-------------|--|
| trf_5_2 | Bra003 | 23  |    |   |    |      |      | GCUGGAGUAGCUCAGU | ACCAACCGGGCUACUG | Cleavage    |  |
| 40      | 602    | 3   | .1 | 1 | 20 | 274  | 293  | UGGU             | CAGC             | 1           |  |
|         | Bra012 | 16  |    |   |    |      |      | GGUCCCAUGGUCUAGC | AACUGCUACUCCAUGG | Translation |  |
| trf_5_1 | 946    | 3   | .6 | 1 | 20 | 957  | 976  | GGUU             | GACU             | 1           |  |
|         | Bra012 | 16  |    |   |    |      |      | GGUCCCAUGGUCUAGC | AACUGCUACUCCAUGG | Translation |  |
| trf_5_2 | 946    | 3   | .6 | 1 | 20 | 957  | 976  | GGUU             | GACU             | 1           |  |
|         | Bra037 | 22  |    |   |    |      |      | UCCGUUAUCGUCCAGC | GUUGAAACCGCUGUCU | Translation |  |
| trf_5_3 | 748    | 2.5 | .8 | 1 | 25 | 561  | 585  | GGUUAGGAU        | GAUAACGGA        | 1           |  |
|         | Bra037 | 22  |    |   |    |      |      | UCCGUUAUCGUCCAGC | GUUGAAACCGCUGUCU | Translation |  |
| trf_5_6 | 748    | 2.5 | .8 | 1 | 25 | 561  | 585  | GGUUAGGAU        | GAUAACGGA        | 1           |  |
|         | Bra037 | 22  |    |   |    |      |      | UCCGUUAUCGUCCAGC | AACCGCUGUCUGAUAA | Translation |  |
| trf_5_7 | 748    | 2.5 | .8 | 1 | 20 | 566  | 585  | GGUU             | CGGA             | 1           |  |
|         | Bra037 | 22  |    |   |    |      |      | UCCGUUAUCGUCCAGC | AACCGCUGUCUGAUAA | Translation |  |
| trf_5_8 | 748    | 2.5 | .8 | 1 | 20 | 566  | 585  | GGUU             | CGGA             | 1           |  |
|         | Bra037 | 22  |    |   |    |      |      | UCCGUUAUCGUCCAGC | AACCGCUGUCUGAUAA | Translation |  |
| trf_5_9 | 748    | 2.5 | .8 | 1 | 20 | 566  | 585  | GGUU             | CGGA             | 1           |  |
| trf_5_1 | Bra037 | 22  |    |   |    |      |      | UCCGUUAUCGUCCAGC | GUUGAAACCGCUGUCU | Translation |  |
| 0       | 748    | 2.5 | .8 | 1 | 25 | 561  | 585  | GGUUAGGAU        | GAUAACGGA        | 1           |  |
| trf_5_2 | Bra037 | 14  |    |   |    |      |      | UCCGUUGUAGUCUAGC | UGACUGGUUAGGCCAC | Translation |  |
| 7       | 499    | 3   | .7 | 1 | 22 | 174  | 195  | UGGUCA           | AACGGA           | 1           |  |
| trf_5_3 | Bra015 | 24  |    |   |    |      |      | AUCAGAGUGGCGCAGC | CGUUUCCACUGCACCA | Translation |  |
| 9       | 824    | 3   | .0 | 1 | 23 | 916  | 938  | GGAAGCG          | CUCUGAC          | 1           |  |
| trf_5_3 | Bra033 | 18  |    |   |    |      |      | AUCAGAGUGGCGCAGC | UUACGUUGCACCACUU | Translation |  |
| 9       | 352    | 3   | .3 | 1 | 20 | 590  | 609  | GGAA             | UGAU             | 1           |  |
| trf_5_4 | Bra033 | 21  |    |   |    |      |      | GGGGAUGUAGCUCAA  | ACCCUUUGGGUAACAU | Translation |  |
| 1       | 370    | 3   | .6 | 1 | 20 | 4750 | 4769 | UGGU             | CCCC             | 1           |  |
| trf_5_5 | Bra012 | 16  |    |   |    |      |      | GGUCCCAUGGUCUAGC | AACUGCUACUCCAUGG | Translation |  |
| 2       | 946    | 3   | .6 | 1 | 20 | 957  | 976  | GGUU             | GACU             | 1           |  |
| trf_5_5 | Bra012 | 16  |    |   |    |      |      | GGUCCCAUGGUCUAGC | AACUGCUACUCCAUGG | Translation |  |
| 3       | 946    | 3   | .6 | 1 | 20 | 957  | 976  | GGUU             | GACU             | 1           |  |
| trf_5_5 | Bra037 | 14  |    |   |    |      |      | UCCGUUGUAGUCUAGC | UGACUGGUUAGGCCAC | Translation |  |
| 4       | 499    | 3   | .7 | 1 | 22 | 174  | 195  | UGGUCA           | AACGGA           | 1           |  |
| trf_5_5 | Bra037 | 14  |    |   |    |      |      | UCCGUUGUAGUCUAGC | UGACUGGUUAGGCCAC | Translation |  |
| 5       | 499    | 3   | .7 | 1 | 22 | 174  | 195  | UGGUCA           | AACGGA           | 1           |  |



|         |        |     |    |   |    |      |      |                  |                   |        |   |
|---------|--------|-----|----|---|----|------|------|------------------|-------------------|--------|---|
| trf_5_5 | Bra020 | 15  |    |   |    |      |      | UCCGUUGUCGUCCAGC | AACUGCUGGAAGACAA  | Transl |   |
| 7       | 153    | 2.5 | .4 | 1 | 20 | 1955 | 1974 | GGUU             | UGGG              | ation  | 1 |
| trf_5_5 | Bra012 | 18  |    |   |    |      |      | UCCGUUGUCGUCCAGC | AAUCGCUGAACCACAAC | Transl |   |
| 7       | 143    | 2.5 | .5 | 1 | 20 | 392  | 411  | GGUU             | GGA               | ation  | 1 |
| trf_5_5 | Bra037 | 22  |    |   |    |      |      | UCCGUUGUCGUCCAGC | AACCGCUGUCUGAUAA  | Transl |   |
| 7       | 748    | 3   | .8 | 1 | 20 | 566  | 585  | GGUU             | CGGA              | ation  | 1 |
| trf_5_5 | Bra020 | 15  |    |   |    |      |      | UCCGUUGUCGUCCAGC | CCAACUGCUGGAAGAC  | Transl |   |
| 8       | 153    | 2.5 | .4 | 1 | 22 | 1953 | 1974 | GGUUAG           | AAUGGG            | ation  | 1 |
| trf_5_5 | Bra012 | 18  |    |   |    |      |      | UCCGUUGUCGUCCAGC | AAUCGCUGAACCACAAC | Transl |   |
| 8       | 143    | 2.5 | .5 | 1 | 20 | 392  | 411  | GGUU             | GGA               | ation  | 1 |
| trf_5_5 | Bra037 | 22  |    |   |    |      |      | UCCGUUGUCGUCCAGC | GUUGAAACCGCUGUCU  | Transl |   |
| 8       | 748    | 3   | .8 | 1 | 25 | 561  | 585  | GGUUAGGAU        | GAUAACGGA         | ation  | 1 |
| trf_5_6 | Bra020 | 15  |    |   |    |      |      | UCCGUUGUCGUCCAGC | CCAACUGCUGGAAGAC  | Transl |   |
| 0       | 153    | 2.5 | .4 | 1 | 22 | 1953 | 1974 | GGUUAG           | AAUGGG            | ation  | 1 |
| trf_5_6 | Bra012 | 18  |    |   |    |      |      | UCCGUUGUCGUCCAGC | AAUCGCUGAACCACAAC | Transl |   |
| 0       | 143    | 2.5 | .5 | 1 | 20 | 392  | 411  | GGUU             | GGA               | ation  | 1 |
| trf_5_6 | Bra037 | 22  |    |   |    |      |      | UCCGUUGUCGUCCAGC | GUUGAAACCGCUGUCU  | Transl |   |
| 0       | 748    | 3   | .8 | 1 | 25 | 561  | 585  | GGUUAGGAU        | GAUAACGGA         | ation  | 1 |
| trf_5_7 | Bra037 | 12  |    |   |    |      |      | GACGGUUUGGCCGAGU | UUGACUACUCGUCCAA  | Transl |   |
| 8       | 152    | 3   | .2 | 1 | 22 | 478  | 499  | GGUCUA           | ACCCUC            | ation  | 1 |
| trf_5_7 | Bra018 | 7.  |    |   |    |      |      | GACGGUUUGGCCGAGU | CCCAAGACCACUCCUCG | Transl |   |
| 8       | 257    | 3   | 1  | 1 | 25 | 27   | 51   | GGUCUAAGG        | AAACCGUC          | ation  | 1 |
| trf_5_7 | Bra012 | 16  |    |   |    |      |      | GGUCCCAUGGUCUAGC | AACUGCUCUCCAUGG   | Transl |   |
| 9       | 946    | 3   | .6 | 1 | 20 | 957  | 976  | GGUU             | GACU              | ation  | 1 |
| trf_5_8 | Bra012 | 16  |    |   |    |      |      | GGUCCCAUGGUCUAGC | AACUGCUCUCCAUGG   | Transl |   |
| 0       | 946    | 3   | .6 | 1 | 20 | 957  | 976  | GGUU             | GACU              | ation  | 1 |
| trf_5_8 | Bra015 | 24  |    |   |    |      |      | AUCAGAGUGGCGCAGC | CGUUUCCACUGCACCA  | Transl |   |
| 1       | 824    | 3   | .0 | 1 | 23 | 916  | 938  | GGAAGCG          | CUCUGAC           | ation  | 1 |
| trf_5_8 | Bra033 | 18  |    |   |    |      |      | AUCAGAGUGGCGCAGC | UUACGUUGCACCACUU  | Transl |   |
| 1       | 352    | 3   | .3 | 1 | 20 | 590  | 609  | GGAA             | UGAU              | ation  | 1 |
| trf_5_8 | Bra037 | 14  |    |   |    |      |      | UCCGUUGUAGUCUAGC | UGACUGGUUAGGCCAC  | Transl |   |
| 2       | 499    | 3   | .7 | 1 | 22 | 174  | 195  | UGGUCA           | AACGGA            | ation  | 1 |
| trf_5_8 | Bra015 | 24  |    |   |    |      |      | AUCAGAGUGGCGCAGC | CGUUUCCACUGCACCA  | Transl |   |
| 3       | 824    | 3   | .0 | 1 | 23 | 916  | 938  | GGAAGCG          | CUCUGAC           | ation  | 1 |

|         |        |     |    |   |    |      |      |                  |                   |        |   |
|---------|--------|-----|----|---|----|------|------|------------------|-------------------|--------|---|
| trf_5_8 | Bra033 | 18  |    |   |    |      |      | AUCAGAGUGGCGCAGC | UUACGUUGCACCACUU  | Transl |   |
| 3       | 352    | 3   | .3 | 1 | 20 | 590  | 609  | GGAA             | UGAU              | ation  | 1 |
| trf_5_9 | Bra027 | 22  |    |   |    |      |      | GCCGACUUAGCUCAGU | UACCACAGGGCGAAGU  | Transl |   |
| 6       | 297    | 3   | .9 | 1 | 20 | 178  | 197  | GGUA             | UGGC              | ation  | 1 |
| trf_5_9 | Bra037 | 14  |    |   |    |      |      | UCCGUUGUAGUCUAGC | UGACUGGUUAGGCCAC  | Transl |   |
| 7       | 499    | 3   | .7 | 1 | 22 | 174  | 195  | UGGUCA           | AACGGA            | ation  | 1 |
| trf_5_1 | Bra037 | 22  |    |   |    |      |      | UCCGUUAUCGUCCAGC | GUUGAAACCGCUGUCU  | Transl |   |
| 19      | 748    | 2.5 | .8 | 1 | 25 | 561  | 585  | GGUUAGGAU        | GAUAACGGA         | ation  | 1 |
| trf_5_1 | Bra037 | 22  |    |   |    |      |      | UCCGUUAUCGUCCAGC | AACCGCUGUCUGAUAA  | Transl |   |
| 21      | 748    | 2.5 | .8 | 1 | 20 | 566  | 585  | GGUU             | CGGA              | ation  | 1 |
| trf_5_1 | Bra037 | 22  |    |   |    |      |      | UCCGUUAUCGUCCAGC | AACCGCUGUCUGAUAA  | Transl |   |
| 22      | 748    | 2.5 | .8 | 1 | 20 | 566  | 585  | GGUU             | CGGA              | ation  | 1 |
| trf_5_1 | Bra037 | 22  |    |   |    |      |      | UCCGUUAUCGUCCAGC | AACCGCUGUCUGAUAA  | Transl |   |
| 24      | 748    | 2.5 | .8 | 1 | 20 | 566  | 585  | GGUU             | CGGA              | ation  | 1 |
| trf_5_1 | Bra037 | 22  |    |   |    |      |      | UCCGUUAUCGUCCAGC | GUUGAAACCGCUGUCU  | Transl |   |
| 25      | 748    | 2.5 | .8 | 1 | 25 | 561  | 585  | GGUUAGGAU        | GAUAACGGA         | ation  | 1 |
| trf_5_1 | Bra037 | 22  |    |   |    |      |      | UCCGUUAUCGUCCAGC | GUUGAAACCGCUGUCU  | Transl |   |
| 26      | 748    | 2.5 | .8 | 1 | 25 | 561  | 585  | GGUUAGGAU        | GAUAACGGA         | ation  | 1 |
| trf_5_1 | Bra015 | 24  |    |   |    |      |      | AUCAGAGUGGCGCAGC | CGUUUCCACUGCACCA  | Transl |   |
| 39      | 824    | 3   | .0 | 1 | 23 | 916  | 938  | GGAAGCG          | CUCUGAC           | ation  | 1 |
| trf_5_1 | Bra033 | 18  |    |   |    |      |      | AUCAGAGUGGCGCAGC | UUACGUUGCACCACUU  | Transl |   |
| 39      | 352    | 3   | .3 | 1 | 20 | 590  | 609  | GGAA             | UGAU              | ation  | 1 |
| trf_5_1 | Bra015 | 24  |    |   |    |      |      | AUCAGAGUGGCGCAGC | CGUUUCCACUGCACCA  | Transl |   |
| 45      | 824    | 3   | .0 | 1 | 23 | 916  | 938  | GGAAGCG          | CUCUGAC           | ation  | 1 |
| trf_5_1 | Bra033 | 18  |    |   |    |      |      | AUCAGAGUGGCGCAGC | UUACGUUGCACCACUU  | Transl |   |
| 45      | 352    | 3   | .3 | 1 | 20 | 590  | 609  | GGAA             | UGAU              | ation  | 1 |
| trf_5_1 | Bra020 | 15  |    |   |    |      |      | UCCGUUGUCGUCCAGC | CCAACUGCUGGAAGAC  | Transl |   |
| 46      | 153    | 2.5 | .4 | 1 | 22 | 1953 | 1974 | GGUUAG           | AAUGGG            | ation  | 1 |
| trf_5_1 | Bra012 | 18  |    |   |    |      |      | UCCGUUGUCGUCCAGC | AAUCGCUGAACCACAAC | Transl |   |
| 46      | 143    | 2.5 | .5 | 1 | 20 | 392  | 411  | GGUU             | GGA               | ation  | 1 |
| trf_5_1 | Bra037 | 22  |    |   |    |      |      | UCCGUUGUCGUCCAGC | AACCGCUGUCUGAUAA  | Transl |   |
| 46      | 748    | 3   | .8 | 1 | 20 | 566  | 585  | GGUU             | CGGA              | ation  | 1 |
| trf_5_1 | Bra020 | 15  |    |   |    |      |      | UCCGUUGUCGUCCAGC | CCAACUGCUGGAAGAC  | Transl |   |
| 49      | 153    | 2.5 | .4 | 1 | 22 | 1953 | 1974 | GGUUAG           | AAUGGG            | ation  | 1 |

|         |        |     |    |   |    |      |      |                  |                   |        |   |
|---------|--------|-----|----|---|----|------|------|------------------|-------------------|--------|---|
| trf_5_1 | Bra012 | 18  |    |   |    |      |      | UCCGUUGUCGUCCAGC | AAUCGCUGAACCACAAC | Transl |   |
| 49      | 143    | 2.5 | .5 | 1 | 20 | 392  | 411  | GGUU             | GGA               | ation  | 1 |
| trf_5_1 | Bra037 | 22  |    |   |    |      |      | UCCGUUGUCGUCCAGC | GUUGAAACCGCUGUCU  | Transl |   |
| 49      | 748    | 3   | .8 | 1 | 25 | 561  | 585  | GGUUAGGAU        | GAUAACGGA         | ation  | 1 |
| trf_5_1 | Bra020 | 15  |    |   |    |      |      | UCCGUUGUCGUCCAGC | CCAACUGCUGGAAGAC  | Transl |   |
| 50      | 153    | 2.5 | .4 | 1 | 22 | 1953 | 1974 | GGUUAG           | AAUGGG            | ation  | 1 |
| trf_5_1 | Bra012 | 18  |    |   |    |      |      | UCCGUUGUCGUCCAGC | AAUCGCUGAACCACAAC | Transl |   |
| 50      | 143    | 2.5 | .5 | 1 | 20 | 392  | 411  | GGUU             | GGA               | ation  | 1 |
| trf_5_1 | Bra037 | 22  |    |   |    |      |      | UCCGUUGUCGUCCAGC | GUUGAAACCGCUGUCU  | Transl |   |
| 50      | 748    | 3   | .8 | 1 | 25 | 561  | 585  | GGUUAGGAU        | GAUAACGGA         | ation  | 1 |
| trf_5_1 | Bra023 | 9.  |    |   |    |      |      | GGUUCUAUGGUGUAG  | AACCAAUACAUGAUAG  | Transl |   |
| 51      | 904    | 3   | 9  | 1 | 20 | 1163 | 1182 | UGGUU            | AAUC              | ation  | 1 |
| trf_5_1 | Bra015 | 24  |    |   |    |      |      | AUCAGAGUGGCGCAGC | CGUUUCCACUGCACCA  | Transl |   |
| 53      | 824    | 3   | .0 | 1 | 23 | 916  | 938  | GGAAGCG          | CUCUGAC           | ation  | 1 |
| trf_5_1 | Bra033 | 18  |    |   |    |      |      | AUCAGAGUGGCGCAGC | UUACGUUGCACCACUU  | Transl |   |
| 53      | 352    | 3   | .3 | 1 | 20 | 590  | 609  | GGAA             | UGAU              | ation  | 1 |
| trf_5_1 | Bra020 | 15  |    |   |    |      |      | UCCGUUGUCGUCCAGC | CCAACUGCUGGAAGAC  | Transl |   |
| 54      | 153    | 2.5 | .4 | 1 | 22 | 1953 | 1974 | GGUUAG           | AAUGGG            | ation  | 1 |
| trf_5_1 | Bra012 | 18  |    |   |    |      |      | UCCGUUGUCGUCCAGC | AAUCGCUGAACCACAAC | Transl |   |
| 54      | 143    | 2.5 | .5 | 1 | 20 | 392  | 411  | GGUU             | GGA               | ation  | 1 |
| trf_5_1 | Bra037 | 22  |    |   |    |      |      | UCCGUUGUCGUCCAGC | AACCGCUGUCUGAUAA  | Transl |   |
| 54      | 748    | 3   | .8 | 1 | 20 | 566  | 585  | GGUU             | CGGA              | ation  | 1 |
| trf_5_1 | Bra020 | 15  |    |   |    |      |      | UCCGUUGUCGUCCAGC | CCAACUGCUGGAAGAC  | Transl |   |
| 55      | 153    | 2.5 | .4 | 1 | 22 | 1953 | 1974 | GGUUAG           | AAUGGG            | ation  | 1 |
| trf_5_1 | Bra012 | 18  |    |   |    |      |      | UCCGUUGUCGUCCAGC | AAUCGCUGAACCACAAC | Transl |   |
| 55      | 143    | 2.5 | .5 | 1 | 20 | 392  | 411  | GGUU             | GGA               | ation  | 1 |
| trf_5_1 | Bra037 | 22  |    |   |    |      |      | UCCGUUGUCGUCCAGC | AACCGCUGUCUGAUAA  | Transl |   |
| 55      | 748    | 3   | .8 | 1 | 20 | 566  | 585  | GGUU             | CGGA              | ation  | 1 |
| trf_5_1 | Bra020 | 15  |    |   |    |      |      | UCCGUUGUCGUCCAGC | CCAACUGCUGGAAGAC  | Transl |   |
| 58      | 153    | 2.5 | .4 | 1 | 22 | 1953 | 1974 | GGUUAG           | AAUGGG            | ation  | 1 |
| trf_5_1 | Bra012 | 18  |    |   |    |      |      | UCCGUUGUCGUCCAGC | AAUCGCUGAACCACAAC | Transl |   |
| 58      | 143    | 2.5 | .5 | 1 | 20 | 392  | 411  | GGUU             | GGA               | ation  | 1 |
| trf_5_1 | Bra037 | 22  |    |   |    |      |      | UCCGUUGUCGUCCAGC | GUUGAAACCGCUGUCU  | Transl |   |
| 58      | 748    | 3   | .8 | 1 | 25 | 561  | 585  | GGUUAGGAU        | GAUAACGGA         | ation  | 1 |

|         |        |     |    |   |    |      |      |                  |                   |        |   |
|---------|--------|-----|----|---|----|------|------|------------------|-------------------|--------|---|
| trf_5_1 | Bra020 | 15  |    |   |    |      |      | UCCGUUGUCGUCCAGC | AACUGCUGGAAGACAA  | Transl |   |
| 59      | 153    | 2.5 | .4 | 1 | 20 | 1955 | 1974 | GGUU             | UGGG              | ation  | 1 |
| trf_5_1 | Bra012 | 18  |    |   |    |      |      | UCCGUUGUCGUCCAGC | AAUCGCUGAACCACAAC | Transl |   |
| 59      | 143    | 2.5 | .5 | 1 | 20 | 392  | 411  | GGUU             | GGA               | ation  | 1 |
| trf_5_1 | Bra037 | 22  |    |   |    |      |      | UCCGUUGUCGUCCAGC | AACCGCUGUCUGAUAA  | Transl |   |
| 59      | 748    | 3   | .8 | 1 | 20 | 566  | 585  | GGUU             | CGGA              | ation  | 1 |
| trf_5_1 | Bra015 | 24  |    |   |    |      |      | AUCAGAGUGGCGCAGC | CGUUUCCACUGCACCA  | Transl |   |
| 66      | 824    | 3   | .0 | 1 | 23 | 916  | 938  | GGAAGCG          | CUCUGAC           | ation  | 1 |
| trf_5_1 | Bra033 | 18  |    |   |    |      |      | AUCAGAGUGGCGCAGC | UUACGUUGCACCACUU  | Transl |   |
| 66      | 352    | 3   | .3 | 1 | 20 | 590  | 609  | GGAA             | UGAU              | ation  | 1 |
| trf_5_1 | Bra015 | 24  |    |   |    |      |      | AUCAGAGUGGCGCAGC | CGUUUCCACUGCACCA  | Transl |   |
| 67      | 824    | 3   | .0 | 1 | 23 | 916  | 938  | GGAAGCG          | CUCUGAC           | ation  | 1 |
| trf_5_1 | Bra033 | 18  |    |   |    |      |      | AUCAGAGUGGCGCAGC | UUACGUUGCACCACUU  | Transl |   |
| 67      | 352    | 3   | .3 | 1 | 20 | 590  | 609  | GGAA             | UGAU              | ation  | 1 |
| trf_5_1 | Bra015 | 24  |    |   |    |      |      | AUCAGAGUGGCGCAGC | CGUUUCCACUGCACCA  | Transl |   |
| 68      | 824    | 3   | .0 | 1 | 23 | 916  | 938  | GGAAGCG          | CUCUGAC           | ation  | 1 |
| trf_5_1 | Bra033 | 18  |    |   |    |      |      | AUCAGAGUGGCGCAGC | UUACGUUGCACCACUU  | Transl |   |
| 68      | 352    | 3   | .3 | 1 | 20 | 590  | 609  | GGAA             | UGAU              | ation  | 1 |
| trf_5_1 | Bra027 | 22  |    |   |    |      |      | GCCGACUUAGCUCAGU | UACCACAGGGCGAAGU  | Transl |   |
| 78      | 297    | 3   | .9 | 1 | 20 | 178  | 197  | GGUA             | UGGC              | ation  | 1 |
| trf_5_1 | Bra015 | 24  |    |   |    |      |      | AUCAGAGUGGCGCAGC | CGUUUCCACUGCACCA  | Transl |   |
| 80      | 824    | 3   | .0 | 1 | 23 | 916  | 938  | GGAAGCG          | CUCUGAC           | ation  | 1 |
| trf_5_1 | Bra033 | 18  |    |   |    |      |      | AUCAGAGUGGCGCAGC | UUACGUUGCACCACUU  | Transl |   |
| 80      | 352    | 3   | .3 | 1 | 20 | 590  | 609  | GGAA             | UGAU              | ation  | 1 |
| trf_5_1 | Bra015 | 24  |    |   |    |      |      | AUCAGAGUGGCGCAGC | CGUUUCCACUGCACCA  | Transl |   |
| 81      | 824    | 3   | .0 | 1 | 23 | 916  | 938  | GGAAGCG          | CUCUGAC           | ation  | 1 |
| trf_5_1 | Bra033 | 18  |    |   |    |      |      | AUCAGAGUGGCGCAGC | UUACGUUGCACCACUU  | Transl |   |
| 81      | 352    | 3   | .3 | 1 | 20 | 590  | 609  | GGAA             | UGAU              | ation  | 1 |
| trf_5_1 | Bra033 | 10  |    |   |    |      |      | GGGAUUGUAGUUCAA  | ACCGAUUGAUCAGCAA  | Transl |   |
| 89      | 536    | 3   | .5 | 1 | 20 | 426  | 445  | UCGGU            | UUCC              | ation  | 1 |
| trf_5_1 | Bra033 | 10  |    |   |    |      |      | GGGAUUGUAGUUCAA  | ACCGAUUGAUCAGCAA  | Transl |   |
| 93      | 536    | 3   | .5 | 1 | 20 | 426  | 445  | UCGGU            | UUCC              | ation  | 1 |
| trf_5_2 | Bra034 | 11  |    |   |    |      |      | GGGAUUGUAGUUCAA  | UCCAAAUGAGCAGCAA  | Transl |   |
| 02      | 753    | 3   | .6 | 1 | 20 | 443  | 462  | UUGGA            | UCCC              | ation  | 1 |

|         |        |     |    |   |    |      |      |                  |                   |        |   |
|---------|--------|-----|----|---|----|------|------|------------------|-------------------|--------|---|
| trf_5_2 | Bra003 | 13  |    |   |    |      |      | GGGAUUGUAGUUCAA  | UCCAGUUAUUCUACAA  | Transl |   |
| 02      | 597    | 3   | .1 | 1 | 20 | 1508 | 1527 | UUGGA            | UUCC              | ation  | 1 |
| trf_5_2 | Bra023 | 12  |    |   |    |      |      | GGGAUUGUAGUUCAA  | UCCAAGUGAACAUCAA  | Transl |   |
| 02      | 172    | 3   | .4 | 1 | 20 | 614  | 633  | UUGGA            | UCCC              | ation  | 1 |
| trf_5_2 | Bra034 | 9.  |    |   |    |      |      | GGGAUUGUAGUUCAA  | CCUAAUUCAACCACAA  | Transl |   |
| 03      | 571    | 3   | 0  | 1 | 20 | 52   | 71   | UUGGG            | UCUC              | ation  | 1 |
| trf_5_2 | Bra034 | 9.  |    |   |    |      |      | GGGAUUGUAGUUCAA  | CCUAAUUCAACCACAA  | Transl |   |
| 05      | 571    | 3   | 0  | 1 | 20 | 52   | 71   | UUGGG            | UCUC              | ation  | 1 |
| trf_5_2 | Bra020 | 15  |    |   |    |      |      | UCCGUUGUCGUCCAGC | CCAACUGCUGGAAGAC  | Transl |   |
| 17      | 153    | 2.5 | .4 | 1 | 22 | 1953 | 1974 | GGUUAG           | AAUGGG            | ation  | 1 |
| trf_5_2 | Bra012 | 18  |    |   |    |      |      | UCCGUUGUCGUCCAGC | AAUCGCUGAACCACAAC | Transl |   |
| 17      | 143    | 2.5 | .5 | 1 | 20 | 392  | 411  | GGUU             | GGA               | ation  | 1 |
| trf_5_2 | Bra037 | 22  |    |   |    |      |      | UCCGUUGUCGUCCAGC | GUUGAAACCGCUGUCU  | Transl |   |
| 17      | 748    | 3   | .8 | 1 | 25 | 561  | 585  | GGUUAGGAU        | GAUAACGGA         | ation  | 1 |
| trf_5_2 | Bra020 | 15  |    |   |    |      |      | UCCGUUGUCGUCCAGC | CCAACUGCUGGAAGAC  | Transl |   |
| 20      | 153    | 2.5 | .4 | 1 | 22 | 1953 | 1974 | GGUUAG           | AAUGGG            | ation  | 1 |
| trf_5_2 | Bra012 | 18  |    |   |    |      |      | UCCGUUGUCGUCCAGC | AAUCGCUGAACCACAAC | Transl |   |
| 20      | 143    | 2.5 | .5 | 1 | 20 | 392  | 411  | GGUU             | GGA               | ation  | 1 |
| trf_5_2 | Bra037 | 22  |    |   |    |      |      | UCCGUUGUCGUCCAGC | AACCGCUGUCUGAUAA  | Transl |   |
| 20      | 748    | 3   | .8 | 1 | 20 | 566  | 585  | GGUU             | CGGA              | ation  | 1 |
| trf_5_2 | Bra020 | 15  |    |   |    |      |      | UCCGUUGUCGUCCAGC | CCAACUGCUGGAAGAC  | Transl |   |
| 21      | 153    | 2.5 | .4 | 1 | 22 | 1953 | 1974 | GGUUAG           | AAUGGG            | ation  | 1 |
| trf_5_2 | Bra012 | 18  |    |   |    |      |      | UCCGUUGUCGUCCAGC | AAUCGCUGAACCACAAC | Transl |   |
| 21      | 143    | 2.5 | .5 | 1 | 20 | 392  | 411  | GGUU             | GGA               | ation  | 1 |
| trf_5_2 | Bra037 | 22  |    |   |    |      |      | UCCGUUGUCGUCCAGC | GUUGAAACCGCUGUCU  | Transl |   |
| 21      | 748    | 3   | .8 | 1 | 25 | 561  | 585  | GGUUAGGAU        | GAUAACGGA         | ation  | 1 |
| trf_5_2 | Bra033 | 21  |    |   |    |      |      | GGGGAUGUAGCUCAAA | ACCCUUUGGGUAACAU  | Transl |   |
| 28      | 370    | 3   | .6 | 1 | 20 | 4750 | 4769 | UGGU             | CCCC              | ation  | 1 |
| trf_5_2 | Bra032 | 22  |    |   |    |      |      | GCUGGAGUAGCUCAGU | AUCGGCUGAGCCACUC  | Transl |   |
| 40      | 168    | 2.5 | .3 | 1 | 20 | 150  | 169  | UGGU             | CAGC              | ation  | 1 |
| trf_5_2 | Bra022 | 23  |    |   |    |      |      | GCUGGAGUAGCUCAGU | AUCAAUUGGGAUACUC  | Transl |   |
| 40      | 251    | 3   | .9 | 1 | 20 | 3475 | 3494 | UGGU             | UAGC              | ation  | 1 |
| trf_5_2 | Bra005 | 13  |    |   |    |      |      | GCUGGAGU-        | ACCAACUGAUCUCACU  | Transl |   |
| 40      | 116    | 3   | .5 | 1 | 20 | 234  | 254  | AGCUCAGUUGGU     | CCAGC             | ation  | 1 |

|         |        |    |    |   |    |     |     |                  |                  |        |   |
|---------|--------|----|----|---|----|-----|-----|------------------|------------------|--------|---|
| trf_5_2 | Bra015 | 24 |    |   |    |     |     | AUCAGAGUGGCGCAGC | CGUUUCCACUGCACCA | Transl |   |
| 48      | 824    | 3  | .0 | 1 | 23 | 916 | 938 | GGAAGCG          | CUCUGAC          | ation  | 1 |
| trf_5_2 | Bra033 | 18 |    |   |    |     |     | AUCAGAGUGGCGCAGC | UUACGUUGCACCACUU | Transl |   |
| 48      | 352    | 3  | .3 | 1 | 20 | 590 | 609 | GGAA             | UGAU             | ation  | 1 |
| trf_5_2 | Bra015 | 24 |    |   |    |     |     | AUCAGAGUGGCGCAGC | CGUUUCCACUGCACCA | Transl |   |
| 54      | 824    | 3  | .0 | 1 | 23 | 916 | 938 | GGAAGCG          | CUCUGAC          | ation  | 1 |
| trf_5_2 | Bra033 | 18 |    |   |    |     |     | AUCAGAGUGGCGCAGC | UUACGUUGCACCACUU | Transl |   |
| 54      | 352    | 3  | .3 | 1 | 20 | 590 | 609 | GGAA             | UGAU             | ation  | 1 |

# tRF Embryo

| ncRNA<br>_Acc. | Target<br>_Acc. | Expect<br>ation | U<br>PE | ncRNA<br>_start | ncRNA<br>_end | Target_<br>start | Target<br>_end | ncRNA_aligned_fragme<br>nt | Target_aligned_fragme<br>nt | Inhibit<br>ion | Multip<br>licity |
|----------------|-----------------|-----------------|---------|-----------------|---------------|------------------|----------------|----------------------------|-----------------------------|----------------|------------------|
| trf_6_1        | Bra016          | 3               | 9.      | 1               | 20            | 1045             | 1064           | GUCGUUGUAGUUAUAG           | UACUAUUUAUACUACAA           | Cleava<br>ge   | 1                |
| trf_6_1        | Bra035          | 3               | 10      | 1               | 20            | 1328             | 1347           | UGGUA                      | AGGC                        | Cleava<br>ge   | 1                |
| trf_6_2        | Bra016          | 3               | .4      | 1               | 20            | 1045             | 1064           | GUCGUUGUAGUUAUAG           | UACCACAAUACUUCAA            | Cleava<br>ge   | 1                |
| trf_6_2        | Bra035          | 3               | 9.      | 1               | 20            | 1045             | 1064           | UGGUA                      | CGAG                        | Cleava<br>ge   | 1                |
| trf_6_2        | Bra016          | 3               | 10      | 1               | 20            | 1328             | 1347           | GUCGUUGUAGUUAUAG           | UACUAUUUAUACUACAA           | Cleava<br>ge   | 1                |
| trf_6_3        | Bra035          | 3               | .4      | 1               | 20            | 1045             | 1064           | UGGUA                      | AGGC                        | Cleava<br>ge   | 1                |
| trf_6_3        | Bra024          | 3               | 9.      | 1               | 20            | 1328             | 1347           | GUCGUUGUAGUUAUAG           | UACCACAAUACUUCAA            | Cleava<br>ge   | 1                |
| trf_6_4        | Bra025          | 3               | 7.      | 1               | 23            | 203              | 225            | UGGUA                      | CGAG                        | Cleava<br>ge   | 1                |
| trf_6_4        | Bra024          | 3               | 5       | 1               | 20            | 344              | 363            | GGGGAUGUAGCUCAAA           | UCCAACAUUUCGGUUA            | Cleava<br>ge   | 1                |
| trf_6_5        | Bra025          | 3               | 17      | 1               | 24            | 202              | 225            | UGGUAGA                    | CAUCCCC                     | Cleava<br>ge   | 1                |
| trf_6_5        | Bra007          | 3               | .2      | 1               | 20            | 344              | 363            | UGGU                       | ACAUAUUUGAGCUUCAU           | Cleava<br>ge   | 1                |
| trf_6_6        | Bra024          | 2.5             | .1      | 1               | 20            | 511              | 530            | GGGGAUGUAGCUCAAA           | CUUC                        | Cleava<br>ge   | 1                |
| trf_6_7        | Bra025          | 3               | 7.      | 1               | 23            | 203              | 225            | UGGUAGA                    | UCCAACAUUUCGGUUA            | Cleava<br>ge   | 1                |
| trf_6_7        | Bra007          | 3               | 17      | 1               | 20            | 344              | 363            | UGGU                       | CAUCCCC                     | Cleava<br>ge   | 1                |
| trf_6_10       | Bra000          | 2.5             | .1      | 1               | 20            | 511              | 530            | GGGGAUGUAGCUCAAA           | ACAUAUUUGAGCUUCAU           | Cleava<br>ge   | 1                |
| trf_6_11       | Bra000          | 2.5             | .2      | 1               | 21            | 984              | 1004           | UGGU                       | CUUC                        | Cleava<br>ge   | 1                |
|                |                 |                 |         |                 |               |                  |                | GCACCAGUGGUCUAGU           | UACUACUGGACCUUUG            | Cleava<br>ge   | 1                |
|                |                 |                 |         |                 |               |                  |                | GGUA                       | GUGC                        | Cleava<br>ge   | 1                |
|                |                 |                 |         |                 |               |                  |                | UCCGUUAUCGUCCAGC           | UAACCGGAGGACGAUA            | Cleava<br>ge   | 1                |
|                |                 |                 |         |                 |               |                  |                | GGUUA                      | AUGGA                       | Cleava<br>ge   | 1                |

|         |        |     |    |   |    |     |      |                  |                  |        |   |
|---------|--------|-----|----|---|----|-----|------|------------------|------------------|--------|---|
| trf_6_1 | Bra032 | 22  |    |   |    |     |      | UCCGUUAUCGUCCAGC | GACGGCUUGACGAUGA | Cleava |   |
| 1       | 111    | 3   | .4 | 1 | 20 | 727 | 746  | GGUU             | CGGA             | ge     | 1 |
| trf_6_1 | Bra000 | 11  |    |   |    |     |      | UCCGUUAUCGUCCAGC | UAACCGGAGGACGAUA | Cleava |   |
| 2       | 529    | 2.5 | .2 | 1 | 21 | 984 | 1004 | GGUUA            | AUGGA            | ge     | 1 |
| trf_6_1 | Bra032 | 22  |    |   |    |     |      | UCCGUUAUCGUCCAGC | GACGGCUUGACGAUGA | Cleava |   |
| 2       | 111    | 3   | .4 | 1 | 20 | 727 | 746  | GGUU             | CGGA             | ge     | 1 |
| trf_6_1 | Bra000 | 11  |    |   |    |     |      | UCCGUUAUCGUCCAGC | AACCGGAGGACGAUAA | Cleava |   |
| 3       | 529    | 2.5 | .2 | 1 | 20 | 985 | 1004 | GGUU             | UGGA             | ge     | 1 |
| trf_6_1 | Bra032 | 22  |    |   |    |     |      | UCCGUUAUCGUCCAGC | GACGGCUUGACGAUGA | Cleava |   |
| 3       | 111    | 3   | .4 | 1 | 20 | 727 | 746  | GGUU             | CGGA             | ge     | 1 |
| trf_6_1 | Bra000 | 11  |    |   |    |     |      | UCCGUUAUCGUCCAGC | UAACCGGAGGACGAUA | Cleava |   |
| 4       | 529    | 2.5 | .2 | 1 | 21 | 984 | 1004 | GGUUA            | AUGGA            | ge     | 1 |
| trf_6_1 | Bra032 | 22  |    |   |    |     |      | UCCGUUAUCGUCCAGC | GACGGCUUGACGAUGA | Cleava |   |
| 4       | 111    | 3   | .4 | 1 | 20 | 727 | 746  | GGUU             | CGGA             | ge     | 1 |
| trf_6_1 | Bra013 | 22  |    |   |    |     |      | UCCGUUGUAGUCUAGC | CAUCAUCAGCUUGGCU | Cleava |   |
| 5       | 528    | 3   | .0 | 1 | 24 | 196 | 219  | UGGUUAGG         | AUAACGGG         | ge     | 1 |
| trf_6_1 | Bra024 | 7.  |    |   |    |     |      | GGGGAUGUAGCUCAAA | UCCAACAUUUCGGUUA | Cleava |   |
| 6       | 638    | 3   | 5  | 1 | 23 | 203 | 225  | UGGUAGA          | CAUCCCC          | ge     | 1 |
| trf_6_1 | Bra025 | 17  |    |   |    |     |      | GGGGAUGUAGCUCAAA | ACAAUUUGAGCUUCAU | Cleava |   |
| 6       | 904    | 3   | .2 | 1 | 20 | 344 | 363  | UGGU             | CUUC             | ge     | 1 |
| trf_6_1 | Bra020 | 12  |    |   |    |     |      | GGGGAUGUAGCUCAAA | GCCAUUGGAGCUAUAU | Cleava |   |
| 7       | 755    | 3   | .6 | 1 | 20 | 454 | 473  | UGGU             | UCUC             | ge     | 1 |
| trf_6_1 | Bra025 | 17  |    |   |    |     |      | GGGGAUGUAGCUCAAA | ACAAUUUGAGCUUCAU | Cleava |   |
| 7       | 904    | 3   | .2 | 1 | 20 | 344 | 363  | UGGU             | CUUC             | ge     | 1 |
| trf_6_1 | Bra024 | 7.  |    |   |    |     |      | GGGGAUGUAGCUCAAA | AACAUUUCGGUUACAU | Cleava |   |
| 7       | 638    | 3   | 5  | 1 | 20 | 206 | 225  | UGGU             | CCCC             | ge     | 1 |
| trf_6_1 | Bra016 | 20  |    |   |    |     |      | UCCGUCGUAGUCUAGC | CUGAAGAAGCUAGGCU | Cleava |   |
| 8       | 601    | 3   | .8 | 1 | 24 | 415 | 438  | UGGUUAGG         | GCGACGGA         | ge     | 1 |
| trf_6_1 | Bra016 | 20  |    |   |    |     |      | UCCGUCGUAGUCUAGC | CUGAAGAAGCUAGGCU | Cleava |   |
| 9       | 601    | 3   | .8 | 1 | 24 | 415 | 438  | UGGUUAGG         | GCGACGGA         | ge     | 1 |
| trf_6_2 | Bra016 | 20  |    |   |    |     |      | UCCGUCGUAGUCUAGC | CUGAAGAAGCUAGGCU | Cleava |   |
| 0       | 601    | 3   | .8 | 1 | 24 | 415 | 438  | UGGUUAGG         | GCGACGGA         | ge     | 1 |
| trf_6_2 | Bra016 | 20  |    |   |    |     |      | UCCGUCGUAGUCUAGC | CUGAAGAAGCUAGGCU | Cleava |   |
| 2       | 601    | 3   | .8 | 1 | 24 | 415 | 438  | UGGUUAGG         | GCGACGGA         | ge     | 1 |



|         |        |    |    |   |    |      |      |                  |                   |        |   |
|---------|--------|----|----|---|----|------|------|------------------|-------------------|--------|---|
| trf_6_2 | Bra016 | 20 |    |   |    |      |      | UCCGUCGUAGUCUAGC | AAGAAGCUAGGCUGCG  | Cleava |   |
| 3       | 601    | 3  | .8 | 1 | 21 | 418  | 438  | UGGUU            | ACGGA             | ge     | 1 |
| trf_6_2 | Bra016 | 9. |    |   |    |      |      | GUCGUUGUAGUUAUAG | UACUAUUUAUACUACAA | Cleava |   |
| 4       | 584    | 3  | 9  | 1 | 20 | 1045 | 1064 | UGGUA            | AGGC              | ge     | 1 |
| trf_6_2 | Bra035 | 10 |    |   |    |      |      | GUCGUUGUAGUUAUAG | UACCACAAUACUUCAA  | Cleava |   |
| 4       | 409    | 3  | .4 | 1 | 20 | 1328 | 1347 | UGGUA            | CGAG              | ge     | 1 |
| trf_6_2 | Bra016 | 9. |    |   |    |      |      | GUCGUUGUAGUUAUAG | UACUAUUUAUACUACAA | Cleava |   |
| 5       | 584    | 3  | 9  | 1 | 20 | 1045 | 1064 | UGGUA            | AGGC              | ge     | 1 |
| trf_6_2 | Bra035 | 10 |    |   |    |      |      | GUCGUUGUAGUUAUAG | UACCACAAUACUUCAA  | Cleava |   |
| 5       | 409    | 3  | .4 | 1 | 20 | 1328 | 1347 | UGGUA            | CGAG              | ge     | 1 |
| trf_6_2 | Bra016 | 9. |    |   |    |      |      | GUCGUUGUAGUUAUAG | UACUAUUUAUACUACAA | Cleava |   |
| 6       | 584    | 3  | 9  | 1 | 20 | 1045 | 1064 | UGGUA            | AGGC              | ge     | 1 |
| trf_6_2 | Bra035 | 10 |    |   |    |      |      | GUCGUUGUAGUUAUAG | UACCACAAUACUUCAA  | Cleava |   |
| 6       | 409    | 3  | .4 | 1 | 20 | 1328 | 1347 | UGGUA            | CGAG              | ge     | 1 |
| trf_6_2 | Bra016 | 9. |    |   |    |      |      | GUCGUUGUAGUUAUAG | UACUAUUUAUACUACAA | Cleava |   |
| 7       | 584    | 3  | 9  | 1 | 20 | 1045 | 1064 | UGGUA            | AGGC              | ge     | 1 |
| trf_6_2 | Bra035 | 10 |    |   |    |      |      | GUCGUUGUAGUUAUAG | UACCACAAUACUUCAA  | Cleava |   |
| 7       | 409    | 3  | .4 | 1 | 20 | 1328 | 1347 | UGGUA            | CGAG              | ge     | 1 |
| trf_6_2 | Bra016 | 9. |    |   |    |      |      | GUCGUUGUAGUUAUAG | UACUAUUUAUACUACAA | Cleava |   |
| 8       | 584    | 3  | 9  | 1 | 20 | 1045 | 1064 | UGGUA            | AGGC              | ge     | 1 |
| trf_6_2 | Bra035 | 10 |    |   |    |      |      | GUCGUUGUAGUUAUAG | UACCACAAUACUUCAA  | Cleava |   |
| 8       | 409    | 3  | .4 | 1 | 20 | 1328 | 1347 | UGGUA            | CGAG              | ge     | 1 |
| trf_6_2 | Bra016 | 9. |    |   |    |      |      | GUCGUUGUAGUUAUAG | UACUAUUUAUACUACAA | Cleava |   |
| 9       | 584    | 3  | 9  | 1 | 20 | 1045 | 1064 | UGGUA            | AGGC              | ge     | 1 |
| trf_6_2 | Bra035 | 10 |    |   |    |      |      | GUCGUUGUAGUUAUAG | UACCACAAUACUUCAA  | Cleava |   |
| 9       | 409    | 3  | .4 | 1 | 20 | 1328 | 1347 | UGGUA            | CGAG              | ge     | 1 |
| trf_6_3 | Bra016 | 9. |    |   |    |      |      | GUCGUUGUAGUUAUAG | UACUAUUUAUACUACAA | Cleava |   |
| 0       | 584    | 3  | 9  | 1 | 20 | 1045 | 1064 | UGGUA            | AGGC              | ge     | 1 |
| trf_6_3 | Bra035 | 10 |    |   |    |      |      | GUCGUUGUAGUUAUAG | UACCACAAUACUUCAA  | Cleava |   |
| 0       | 409    | 3  | .4 | 1 | 20 | 1328 | 1347 | UGGUA            | CGAG              | ge     | 1 |
| trf_6_3 | Bra016 | 9. |    |   |    |      |      | GUCGUUGUAGUUAUAG | UACUAUUUAUACUACAA | Cleava |   |
| 1       | 584    | 3  | 9  | 1 | 20 | 1045 | 1064 | UGGUA            | AGGC              | ge     | 1 |
| trf_6_3 | Bra035 | 10 |    |   |    |      |      | GUCGUUGUAGUUAUAG | UACCACAAUACUUCAA  | Cleava |   |
| 1       | 409    | 3  | .4 | 1 | 20 | 1328 | 1347 | UGGUA            | CGAG              | ge     | 1 |

|         |        |    |    |   |    |      |      |                  |                   |        |   |
|---------|--------|----|----|---|----|------|------|------------------|-------------------|--------|---|
| trf_6_3 | Bra024 | 7. |    |   |    |      |      | GGGGAUGUAGCUCAAA | UCCAACAUUUCGGUUA  | Cleava |   |
| 4       | 638    | 3  | 5  | 1 | 23 | 203  | 225  | UGGUAGA          | CAUCCCC           | ge     | 1 |
| trf_6_3 | Bra025 | 17 |    |   |    |      |      | GGGGAUGUAGCUCAAA | ACAAUUUGAGCUUCAU  | Cleava |   |
| 4       | 904    | 3  | .2 | 1 | 20 | 344  | 363  | UGGU             | CUUC              | ge     | 1 |
| trf_6_3 | Bra036 | 20 |    |   |    |      |      | GGGGAUGUAGCUCAGA | CUCGACUGGCUGAGCU  | Cleava |   |
| 5       | 771    | 3  | .2 | 1 | 24 | 5374 | 5397 | UGGUAGAG         | ACAUUCCU          | ge     | 1 |
| trf_6_3 | Bra009 | 14 |    |   |    |      |      | GGGGAUGUAGCUCAGA | CGUUAUCAUCUGGGCU  | Cleava |   |
| 5       | 876    | 3  | .9 | 1 | 24 | 14   | 37   | UGGUAGAG         | UCGUCCUC          | ge     | 1 |
| trf_6_3 | Bra016 | 10 |    |   |    |      |      | GGGGAUGUAGCUCAGA | CAUUAUCAUCUGAGCU  | Cleava |   |
| 5       | 141    | 3  | .4 | 1 | 24 | 3029 | 3052 | UGGUAGAG         | UCGUUCUC          | ge     | 1 |
| trf_6_3 | Bra018 | 8. |    |   |    |      |      | GGGGAUGUAGCUCAGA | GCCACCUCAGCUACAUC | Cleava |   |
| 5       | 620    | 3  | 3  | 1 | 20 | 7    | 26   | UGGU             | CUC               | ge     | 1 |
| trf_6_3 | Bra009 | 14 |    |   |    |      |      | GGGGAUGUAGCUCAGA | UUAUCAUCUGGGCUUC  | Cleava |   |
| 6       | 876    | 3  | .9 | 1 | 22 | 16   | 37   | UGGUAG           | GUCCUC            | ge     | 1 |
| trf_6_3 | Bra016 | 10 |    |   |    |      |      | GGGGAUGUAGCUCAGA | UUAUCAUCUGAGCUUC  | Cleava |   |
| 6       | 141    | 3  | .4 | 1 | 22 | 3031 | 3052 | UGGUAG           | GUUCUC            | ge     | 1 |
| trf_6_3 | Bra036 | 20 |    |   |    |      |      | GGGGAUGUAGCUCAGA | UCGACUGGCUGAGCUA  | Cleava |   |
| 6       | 771    | 3  | .2 | 1 | 23 | 5375 | 5397 | UGGUAGA          | CAUUCCU           | ge     | 1 |
| trf_6_3 | Bra018 | 8. |    |   |    |      |      | GGGGAUGUAGCUCAGA | GCCACCUCAGCUACAUC | Cleava |   |
| 6       | 620    | 3  | 3  | 1 | 20 | 7    | 26   | UGGU             | CUC               | ge     | 1 |
| trf_6_4 | Bra013 | 22 |    |   |    |      |      | UCCGUUGUAGUCUAGC | CAUCAUCAGCUUGGCU  | Cleava |   |
| 4       | 528    | 3  | .0 | 1 | 24 | 196  | 219  | UGGUCAGG         | AUAACGGG          | ge     | 1 |
| trf_6_5 | Bra016 | 9. |    |   |    |      |      | GUCGUUGUAGUUAUAG | UACUAUUUAUACUACAA | Cleava |   |
| 3       | 584    | 3  | 9  | 1 | 20 | 1045 | 1064 | UGGUA            | AGGC              | ge     | 1 |
| trf_6_5 | Bra035 | 10 |    |   |    |      |      | GUCGUUGUAGUUAUAG | UACCACAAUACUUCAA  | Cleava |   |
| 3       | 409    | 3  | .4 | 1 | 20 | 1328 | 1347 | UGGUA            | CGAG              | ge     | 1 |
| trf_6_5 | Bra016 | 9. |    |   |    |      |      | GUCGUUGUAGUUAUAG | UACUAUUUAUACUACAA | Cleava |   |
| 4       | 584    | 3  | 9  | 1 | 20 | 1045 | 1064 | UGGUA            | AGGC              | ge     | 1 |
| trf_6_5 | Bra035 | 10 |    |   |    |      |      | GUCGUUGUAGUUAUAG | UACCACAAUACUUCAA  | Cleava |   |
| 4       | 409    | 3  | .4 | 1 | 20 | 1328 | 1347 | UGGUA            | CGAG              | ge     | 1 |
| trf_6_5 | Bra016 | 9. |    |   |    |      |      | GUCGUUGUAGUUAUAG | UACUAUUUAUACUACAA | Cleava |   |
| 5       | 584    | 3  | 9  | 1 | 20 | 1045 | 1064 | UGGUA            | AGGC              | ge     | 1 |
| trf_6_5 | Bra035 | 10 |    |   |    |      |      | GUCGUUGUAGUUAUAG | UACCACAAUACUUCAA  | Cleava |   |
| 5       | 409    | 3  | .4 | 1 | 20 | 1328 | 1347 | UGGUA            | CGAG              | ge     | 1 |

|         |        |    |    |   |    |      |      |               |                  |        |   |
|---------|--------|----|----|---|----|------|------|---------------|------------------|--------|---|
| trf_6_5 | Bra016 | 9. |    |   |    |      |      | GUCGUUGUAGUAG | UACUAUUAUACUACAA | Cleava |   |
| 6       | 584    | 3  | 9  | 1 | 20 | 1045 | 1064 | UGGUA         | AGGC             | ge     | 1 |
| trf_6_5 | Bra035 | 10 |    |   |    |      |      | GUCGUUGUAGUAG | UACCACAAUACUUCAA | Cleava |   |
| 6       | 409    | 3  | .4 | 1 | 20 | 1328 | 1347 | UGGUA         | CGAG             | ge     | 1 |
| trf_6_5 | Bra016 | 9. |    |   |    |      |      | GUCGUUGUAGUAG | UACUAUUAUACUACAA | Cleava |   |
| 7       | 584    | 3  | 9  | 1 | 20 | 1045 | 1064 | UGGUA         | AGGC             | ge     | 1 |
| trf_6_5 | Bra035 | 10 |    |   |    |      |      | GUCGUUGUAGUAG | UACCACAAUACUUCAA | Cleava |   |
| 7       | 409    | 3  | .4 | 1 | 20 | 1328 | 1347 | UGGUA         | CGAG             | ge     | 1 |
| trf_6_5 | Bra016 | 9. |    |   |    |      |      | GUCGUUGUAGUAG | UACUAUUAUACUACAA | Cleava |   |
| 8       | 584    | 3  | 9  | 1 | 20 | 1045 | 1064 | UGGUA         | AGGC             | ge     | 1 |
| trf_6_5 | Bra035 | 10 |    |   |    |      |      | GUCGUUGUAGUAG | UACCACAAUACUUCAA | Cleava |   |
| 8       | 409    | 3  | .4 | 1 | 20 | 1328 | 1347 | UGGUA         | CGAG             | ge     | 1 |
| trf_6_5 | Bra016 | 9. |    |   |    |      |      | GUCGUUGUAGUAG | UACUAUUAUACUACAA | Cleava |   |
| 9       | 584    | 3  | 9  | 1 | 20 | 1045 | 1064 | UGGUA         | AGGC             | ge     | 1 |
| trf_6_5 | Bra035 | 10 |    |   |    |      |      | GUCGUUGUAGUAG | UACCACAAUACUUCAA | Cleava |   |
| 9       | 409    | 3  | .4 | 1 | 20 | 1328 | 1347 | UGGUA         | CGAG             | ge     | 1 |
| trf_6_6 | Bra016 | 9. |    |   |    |      |      | GUCGUUGUAGUAG | UACUAUUAUACUACAA | Cleava |   |
| 0       | 584    | 3  | 9  | 1 | 20 | 1045 | 1064 | UGGUA         | AGGC             | ge     | 1 |
| trf_6_6 | Bra035 | 10 |    |   |    |      |      | GUCGUUGUAGUAG | UACCACAAUACUUCAA | Cleava |   |
| 0       | 409    | 3  | .4 | 1 | 20 | 1328 | 1347 | UGGUA         | CGAG             | ge     | 1 |
| trf_6_6 | Bra016 | 9. |    |   |    |      |      | GUCGUUGUAGUAG | UACUAUUAUACUACAA | Cleava |   |
| 1       | 584    | 3  | 9  | 1 | 20 | 1045 | 1064 | UGGUA         | AGGC             | ge     | 1 |
| trf_6_6 | Bra035 | 10 |    |   |    |      |      | GUCGUUGUAGUAG | UACCACAAUACUUCAA | Cleava |   |
| 1       | 409    | 3  | .4 | 1 | 20 | 1328 | 1347 | UGGUA         | CGAG             | ge     | 1 |
| trf_6_6 | Bra016 | 9. |    |   |    |      |      | GUCGUUGUAGUAG | UACUAUUAUACUACAA | Cleava |   |
| 2       | 584    | 3  | 9  | 1 | 20 | 1045 | 1064 | UGGUA         | AGGC             | ge     | 1 |
| trf_6_6 | Bra016 | 9. |    |   |    |      |      | GUCGUUGUAGUAG | UACUAUUAUACUACAA | Cleava |   |
| 3       | 584    | 3  | 9  | 1 | 20 | 1045 | 1064 | UGGUA         | AGGC             | ge     | 1 |
| trf_6_6 | Bra035 | 10 |    |   |    |      |      | GUCGUUGUAGUAG | UACCACAAUACUUCAA | Cleava |   |
| 3       | 409    | 3  | .4 | 1 | 20 | 1328 | 1347 | UGGUA         | CGAG             | ge     | 1 |
| trf_6_6 | Bra016 | 9. |    |   |    |      |      | GUCGUUGUAGUAG | UACUAUUAUACUACAA | Cleava |   |
| 4       | 584    | 3  | 9  | 1 | 20 | 1045 | 1064 | UGGUA         | AGGC             | ge     | 1 |
| trf_6_6 | Bra035 | 10 |    |   |    |      |      | GUCGUUGUAGUAG | UACCACAAUACUUCAA | Cleava |   |
| 4       | 409    | 3  | .4 | 1 | 20 | 1328 | 1347 | UGGUA         | CGAG             | ge     | 1 |

|         |        |     |    |   |    |      |      |                  |                   |        |   |
|---------|--------|-----|----|---|----|------|------|------------------|-------------------|--------|---|
| trf_6_6 | Bra016 | 9.  |    |   |    |      |      | GUCGUUGUAGUAG    | UACUAUUAUACUACAA  | Cleava |   |
| 5       | 584    | 3   | 9  | 1 | 20 | 1045 | 1064 | UGGUA            | AGGC              | ge     | 1 |
| trf_6_6 | Bra035 | 10  |    |   |    |      |      | GUCGUUGUAGUAG    | UACCACAAUACUUCAA  | Cleava |   |
| 5       | 409    | 3   | .4 | 1 | 20 | 1328 | 1347 | UGGUA            | CGAG              | ge     | 1 |
| trf_6_6 | Bra016 | 9.  |    |   |    |      |      | GUCGUUGUAGUAG    | UACUAUUAUACUACAA  | Cleava |   |
| 6       | 584    | 3   | 9  | 1 | 20 | 1045 | 1064 | UGGUA            | AGGC              | ge     | 1 |
| trf_6_6 | Bra035 | 10  |    |   |    |      |      | GUCGUUGUAGUAG    | UACCACAAUACUUCAA  | Cleava |   |
| 6       | 409    | 3   | .4 | 1 | 20 | 1328 | 1347 | UGGUA            | CGAG              | ge     | 1 |
| trf_6_6 | Bra007 | 14  |    |   |    |      |      | GCACCAGUGGUCUAGU | UACUACUGGACCUUUG  | Cleava |   |
| 8       | 154    | 2.5 | .1 | 1 | 20 | 511  | 530  | GGUA             | GUGC              | ge     | 1 |
| trf_6_7 | Bra009 | 14  |    |   |    |      |      | GGGGAUGUAGCUCAGA | UUAUCAUCUGGGCUUC  | Cleava |   |
| 2       | 876    | 3   | .9 | 1 | 22 | 16   | 37   | UGGUAG           | GUCCUC            | ge     | 1 |
| trf_6_7 | Bra016 | 10  |    |   |    |      |      | GGGGAUGUAGCUCAGA | UUAUCAUCUGAGCUUC  | Cleava |   |
| 2       | 141    | 3   | .4 | 1 | 22 | 3031 | 3052 | UGGUAG           | GUUCUC            | ge     | 1 |
| trf_6_7 | Bra036 | 20  |    |   |    |      |      | GGGGAUGUAGCUCAGA | UCGACUGGCUGAGCUA  | Cleava |   |
| 2       | 771    | 3   | .2 | 1 | 23 | 5375 | 5397 | UGGUAGA          | CAUUCCU           | ge     | 1 |
| trf_6_7 | Bra018 | 8.  |    |   |    |      |      | GGGGAUGUAGCUCAGA | GCCACCUCAGCUACAUC | Cleava |   |
| 2       | 620    | 3   | 3  | 1 | 20 | 7    | 26   | UGGU             | CUC               | ge     | 1 |
| trf_6_7 | Bra016 | 9.  |    |   |    |      |      | GUCGUUGUAGUAG    | UACUAUUAUACUACAA  | Cleava |   |
| 3       | 584    | 3   | 9  | 1 | 20 | 1045 | 1064 | UGGUA            | AGGC              | ge     | 1 |
| trf_6_7 | Bra035 | 10  |    |   |    |      |      | GUCGUUGUAGUAG    | UACCACAAUACUUCAA  | Cleava |   |
| 3       | 409    | 3   | .4 | 1 | 20 | 1328 | 1347 | UGGUA            | CGAG              | ge     | 1 |
| trf_6_7 | Bra016 | 9.  |    |   |    |      |      | GUCGUUGUAGUAG    | UACUAUUAUACUACAA  | Cleava |   |
| 4       | 584    | 3   | 9  | 1 | 20 | 1045 | 1064 | UGGUA            | AGGC              | ge     | 1 |
| trf_6_7 | Bra035 | 10  |    |   |    |      |      | GUCGUUGUAGUAG    | UACCACAAUACUUCAA  | Cleava |   |
| 4       | 409    | 3   | .4 | 1 | 20 | 1328 | 1347 | UGGUA            | CGAG              | ge     | 1 |
| trf_6_7 | Bra016 | 9.  |    |   |    |      |      | GUCGUUGUAGUAG    | UACUAUUAUACUACAA  | Cleava |   |
| 5       | 584    | 3   | 9  | 1 | 20 | 1045 | 1064 | UGGUA            | AGGC              | ge     | 1 |
| trf_6_7 | Bra035 | 10  |    |   |    |      |      | GUCGUUGUAGUAG    | UACCACAAUACUUCAA  | Cleava |   |
| 5       | 409    | 3   | .4 | 1 | 20 | 1328 | 1347 | UGGUA            | CGAG              | ge     | 1 |
| trf_6_7 | Bra016 | 9.  |    |   |    |      |      | GUCGUUGUAGUAG    | UACUAUUAUACUACAA  | Cleava |   |
| 6       | 584    | 3   | 9  | 1 | 20 | 1045 | 1064 | UGGUA            | AGGC              | ge     | 1 |
| trf_6_7 | Bra035 | 10  |    |   |    |      |      | GUCGUUGUAGUAG    | UACCACAAUACUUCAA  | Cleava |   |
| 6       | 409    | 3   | .4 | 1 | 20 | 1328 | 1347 | UGGUA            | CGAG              | ge     | 1 |

|         |        |     |    |   |    |     |     |                  |                   |        |   |
|---------|--------|-----|----|---|----|-----|-----|------------------|-------------------|--------|---|
| trf_6_7 | Bra007 | 14  |    |   |    |     |     | GCACCAGUGGUCUAGU | UACUACUGGACCUUUG  | Cleava |   |
| 8       | 154    | 2.5 | .1 | 1 | 20 | 511 | 530 | GGUA             | GUGC              | ge     | 1 |
| trf_6_7 | Bra007 | 14  |    |   |    |     |     | GCACCAGUGGUCUAGU | UACUACUGGACCUUUG  | Cleava |   |
| 9       | 154    | 2.5 | .1 | 1 | 20 | 511 | 530 | GGUA             | GUGC              | ge     | 1 |
| trf_6_8 | Bra007 | 14  |    |   |    |     |     | GCACCAGUGGUCUAGU | UUACUACUGGACCUUU  | Cleava |   |
| 1       | 154    | 2.5 | .1 | 1 | 21 | 510 | 530 | GGUAG            | GGUGC             | ge     | 1 |
| trf_6_8 | Bra024 | 7.  |    |   |    |     |     | GGGGAUGUAGCUCAA  | UCCAACAUUUCGGUUA  | Cleava |   |
| 5       | 638    | 3   | 5  | 1 | 23 | 203 | 225 | UGGUAGA          | CAUCCCC           | ge     | 1 |
| trf_6_8 | Bra025 | 17  |    |   |    |     |     | GGGGAUGUAGCUCAA  | ACAAUUUGAGCUUCAU  | Cleava |   |
| 5       | 904    | 3   | .2 | 1 | 20 | 344 | 363 | UGGU             | CUUC              | ge     | 1 |
| trf_6_8 | Bra020 | 12  |    |   |    |     |     | GGGGAUGUAGCUCAA  | GCCAUUGGAGCUAUAU  | Cleava |   |
| 6       | 755    | 3   | .6 | 1 | 20 | 454 | 473 | UGGU             | UCUC              | ge     | 1 |
| trf_6_8 | Bra025 | 17  |    |   |    |     |     | GGGGAUGUAGCUCAA  | ACAAUUUGAGCUUCAU  | Cleava |   |
| 6       | 904    | 3   | .2 | 1 | 20 | 344 | 363 | UGGU             | CUUC              | ge     | 1 |
| trf_6_8 | Bra024 | 7.  |    |   |    |     |     | GGGGAUGUAGCUCAA  | AACAUUUCGGUUACA   | Cleava |   |
| 6       | 638    | 3   | 5  | 1 | 20 | 206 | 225 | UGGU             | CCCC              | ge     | 1 |
| trf_6_9 | Bra013 | 22  |    |   |    |     |     | UCCGUUGUAGUCUAGC | CAUCAUCAGCUUGGCU  | Cleava |   |
| 9       | 528    | 3   | .0 | 1 | 24 | 196 | 219 | UGGUCAGG         | AUAACGGG          | ge     | 1 |
| trf_6_1 | Bra013 | 22  |    |   |    |     |     | UCCGUUGUAGUCUAGC | CAUCAUCAGCUUGGCU  | Cleava |   |
| 00      | 528    | 3   | .0 | 1 | 24 | 196 | 219 | UGGUCAGG         | AUAACGGG          | ge     | 1 |
| trf_6_1 | Bra007 | 14  |    |   |    |     |     | GCACCAGUGGUCUAGU | UUACUACUGGACCUUU  | Cleava |   |
| 01      | 154    | 2.5 | .1 | 1 | 21 | 510 | 530 | GGUAG            | GGUGC             | ge     | 1 |
| trf_6_1 | Bra007 | 14  |    |   |    |     |     | GCACCAGUGGUCUAGU | UACUACUGGACCUUUG  | Cleava |   |
| 02      | 154    | 2.5 | .1 | 1 | 20 | 511 | 530 | GGUA             | GUGC              | ge     | 1 |
| trf_6_1 | Bra013 | 22  |    |   |    |     |     | UCCGUUGUAGUCUAGC | CAUCAUCAGCUUGGCU  | Cleava |   |
| 04      | 528    | 3   | .0 | 1 | 24 | 196 | 219 | UGGUCAGG         | AUAACGGG          | ge     | 1 |
| trf_6_1 | Bra007 | 14  |    |   |    |     |     | GCACCAGUGGUCUAGU | UACUACUGGACCUUUG  | Cleava |   |
| 06      | 154    | 2.5 | .1 | 1 | 20 | 511 | 530 | GGUA             | GUGC              | ge     | 1 |
| trf_6_1 | Bra000 | 15  |    |   |    |     |     | GGGUGUUUGGUCUAG  | UUACACCACCAGACCAG | Cleava |   |
| 07      | 791    | 2.5 | .9 | 1 | 23 | 954 | 976 | UGGUAUGA         | ACACCC            | ge     | 1 |
| trf_6_1 | Bra001 | 19  |    |   |    |     |     | GGGUGUUUGGUCUAG  | GAGCCUAUCACUGGAC  | Cleava |   |
| 07      | 870    | 2.5 | .8 | 1 | 25 | 814 | 838 | UGGUAUGAUU       | CAAACACUA         | ge     | 1 |
| trf_6_1 | Bra003 | 12  |    |   |    |     |     | GGGUGUUUGGUCUAG  | AGCCUUAUCACUUGAC  | Cleava |   |
| 07      | 793    | 3   | .4 | 1 | 25 | 516 | 540 | UGGUAUGAUU       | CAAGCAUCU         | ge     | 1 |

|         |        |     |    |   |    |      |      |                  |                   |        |   |
|---------|--------|-----|----|---|----|------|------|------------------|-------------------|--------|---|
| trf_6_1 | Bra007 | 14  |    |   |    |      |      | GCACCAGUGGUCUAGU | UACUACUGGACCUUUG  | Cleava |   |
| 08      | 154    | 2.5 | .1 | 1 | 20 | 511  | 530  | GGUA             | GUGC              | ge     | 1 |
| trf_6_1 | Bra009 | 14  |    |   |    |      |      | GGGGAUGUAGCUCAGA | UUAUCAUCUGGGCUUC  | Cleava |   |
| 10      | 876    | 3   | .9 | 1 | 22 | 16   | 37   | UGGUAG           | GUCCUC            | ge     | 1 |
| trf_6_1 | Bra016 | 10  |    |   |    |      |      | GGGGAUGUAGCUCAGA | UUAUCAUCUGAGCUUC  | Cleava |   |
| 10      | 141    | 3   | .4 | 1 | 22 | 3031 | 3052 | UGGUAG           | GUUCUC            | ge     | 1 |
| trf_6_1 | Bra036 | 20  |    |   |    |      |      | GGGGAUGUAGCUCAGA | UCGACUGGCUGAGCUA  | Cleava |   |
| 10      | 771    | 3   | .2 | 1 | 23 | 5375 | 5397 | UGGUAGA          | CAUUCCU           | ge     | 1 |
| trf_6_1 | Bra018 | 8.  |    |   |    |      |      | GGGGAUGUAGCUCAGA | GCCACCUCAGCUACAUC | Cleava |   |
| 10      | 620    | 3   | 3  | 1 | 20 | 7    | 26   | UGGU             | CUC               | ge     | 1 |
| trf_6_1 | Bra013 | 16  |    |   |    |      |      | UCCGUUGUCGUCCAGC | AUGAUAACCGAUGGAU  | Cleava |   |
| 11      | 584    | 3   | .4 | 1 | 25 | 886  | 910  | GGUUAGGAU        | GUCAAUGGA         | ge     | 1 |
| trf_6_1 | Bra000 | 11  |    |   |    |      |      | UCCGUUGUCGUCCAGC | UAACCGGAGGACGAUA  | Cleava |   |
| 11      | 529    | 3   | .2 | 1 | 21 | 984  | 1004 | GGUUA            | AUGGA             | ge     | 1 |
| trf_6_1 | Bra013 | 16  |    |   |    |      |      | UCCGUUGUCGUCCAGC | AACCGAUGGAUGUCA   | Cleava |   |
| 12      | 584    | 3   | .4 | 1 | 20 | 891  | 910  | GGUU             | UGGA              | ge     | 1 |
| trf_6_1 | Bra000 | 11  |    |   |    |      |      | UCCGUUGUCGUCCAGC | AACCGGAGGACGAUAA  | Cleava |   |
| 12      | 529    | 3   | .2 | 1 | 20 | 985  | 1004 | GGUU             | UGGA              | ge     | 1 |
| trf_6_1 | Bra013 | 16  |    |   |    |      |      | UCCGUUGUCGUCCAGC | UAACCGAUGGAUGUCA  | Cleava |   |
| 13      | 584    | 3   | .4 | 1 | 21 | 890  | 910  | GGUUA            | AUGGA             | ge     | 1 |
| trf_6_1 | Bra000 | 11  |    |   |    |      |      | UCCGUUGUCGUCCAGC | UAACCGGAGGACGAUA  | Cleava |   |
| 13      | 529    | 3   | .2 | 1 | 21 | 984  | 1004 | GGUUA            | AUGGA             | ge     | 1 |
| trf_6_1 | Bra013 | 16  |    |   |    |      |      | UCCGUUGUCGUCCAGC | UAACCGAUGGAUGUCA  | Cleava |   |
| 16      | 584    | 3   | .4 | 1 | 21 | 890  | 910  | GGUUA            | AUGGA             | ge     | 1 |
| trf_6_1 | Bra000 | 11  |    |   |    |      |      | UCCGUUGUCGUCCAGC | UAACCGGAGGACGAUA  | Cleava |   |
| 16      | 529    | 3   | .2 | 1 | 21 | 984  | 1004 | GGUUA            | AUGGA             | ge     | 1 |
| trf_6_1 | Bra013 | 16  |    |   |    |      |      | UCCGUUGUCGUCCAGC | UAUGAUAACCGAUGGA  | Cleava |   |
| 17      | 584    | 3   | .4 | 1 | 26 | 885  | 910  | GGUUAGGAUA       | UGUCAUUGGA        | ge     | 1 |
| trf_6_1 | Bra000 | 11  |    |   |    |      |      | UCCGUUGUCGUCCAGC | UAACCGGAGGACGAUA  | Cleava |   |
| 17      | 529    | 3   | .2 | 1 | 21 | 984  | 1004 | GGUUA            | AUGGA             | ge     | 1 |
| trf_6_1 | Bra013 | 16  |    |   |    |      |      | UCCGUUGUCGUCCAGC | UAUGAUAACCGAUGGA  | Cleava |   |
| 18      | 584    | 3   | .4 | 1 | 26 | 885  | 910  | GGUUAGGAUA       | UGUCAUUGGA        | ge     | 1 |
| trf_6_1 | Bra000 | 11  |    |   |    |      |      | UCCGUUGUCGUCCAGC | UAACCGGAGGACGAUA  | Cleava |   |
| 18      | 529    | 3   | .2 | 1 | 21 | 984  | 1004 | GGUUA            | AUGGA             | ge     | 1 |

|         |        |    |    |   |    |      |      |                  |                   |        |   |
|---------|--------|----|----|---|----|------|------|------------------|-------------------|--------|---|
| trf_6_1 | Bra024 | 7. |    |   |    |      |      | GGGGAUGUAGCUCAAA | UCCAACAUUUCGGUUA  | Cleava |   |
| 43      | 638    | 3  | 5  | 1 | 23 | 203  | 225  | UGGUAGA          | CAUCCCC           | ge     | 1 |
| trf_6_1 | Bra025 | 17 |    |   |    |      |      | GGGGAUGUAGCUCAAA | ACAAUUUGAGCUUCAU  | Cleava |   |
| 43      | 904    | 3  | .2 | 1 | 20 | 344  | 363  | UGGU             | CUUC              | ge     | 1 |
| trf_6_1 | Bra014 | 17 |    |   |    |      |      | GGGGAUGUAGCUCAUA | UGUAUUUAUUAGCU    | Cleava |   |
| 44      | 507    | 3  | .0 | 1 | 23 | 541  | 563  | UGGUAGA          | AUAUCUCC          | ge     | 1 |
| trf_6_1 | Bra024 | 7. |    |   |    |      |      | GGGGAUGUAGCUCAAA | UCCAACAUUUCGGUUA  | Cleava |   |
| 45      | 638    | 3  | 5  | 1 | 23 | 203  | 225  | UGGUAGA          | CAUCCCC           | ge     | 1 |
| trf_6_1 | Bra025 | 17 |    |   |    |      |      | GGGGAUGUAGCUCAAA | ACAAUUUGAGCUUCAU  | Cleava |   |
| 45      | 904    | 3  | .2 | 1 | 20 | 344  | 363  | UGGU             | CUUC              | ge     | 1 |
| trf_6_1 | Bra016 | 9. |    |   |    |      |      | GUCGUUGUAGUAUAG  | UACUAUUUAUACUACAA | Cleava |   |
| 48      | 584    | 3  | 9  | 1 | 20 | 1045 | 1064 | UGGUA            | AGGC              | ge     | 1 |
| trf_6_1 | Bra035 | 10 |    |   |    |      |      | GUCGUUGUAGUAUAG  | UACCACAAUACUUCAA  | Cleava |   |
| 48      | 409    | 3  | .4 | 1 | 20 | 1328 | 1347 | UGGUA            | CGAG              | ge     | 1 |
| trf_6_1 | Bra016 | 9. |    |   |    |      |      | GUCGUUGUAGUAUAG  | UACUAUUUAUACUACAA | Cleava |   |
| 49      | 584    | 3  | 9  | 1 | 20 | 1045 | 1064 | UGGUA            | AGGC              | ge     | 1 |
| trf_6_1 | Bra035 | 10 |    |   |    |      |      | GUCGUUGUAGUAUAG  | UACCACAAUACUUCAA  | Cleava |   |
| 49      | 409    | 3  | .4 | 1 | 20 | 1328 | 1347 | UGGUA            | CGAG              | ge     | 1 |
| trf_6_1 | Bra016 | 9. |    |   |    |      |      | GUCGUUGUAGUAUAG  | UACUAUUUAUACUACAA | Cleava |   |
| 50      | 584    | 3  | 9  | 1 | 20 | 1045 | 1064 | UGGUA            | AGGC              | ge     | 1 |
| trf_6_1 | Bra035 | 10 |    |   |    |      |      | GUCGUUGUAGUAUAG  | UACCACAAUACUUCAA  | Cleava |   |
| 50      | 409    | 3  | .4 | 1 | 20 | 1328 | 1347 | UGGUA            | CGAG              | ge     | 1 |
| trf_6_1 | Bra016 | 9. |    |   |    |      |      | GUCGUUGUAGUAUAG  | UACUAUUUAUACUACAA | Cleava |   |
| 51      | 584    | 3  | 9  | 1 | 20 | 1045 | 1064 | UGGUA            | AGGC              | ge     | 1 |
| trf_6_1 | Bra035 | 10 |    |   |    |      |      | GUCGUUGUAGUAUAG  | UACCACAAUACUUCAA  | Cleava |   |
| 51      | 409    | 3  | .4 | 1 | 20 | 1328 | 1347 | UGGUA            | CGAG              | ge     | 1 |
| trf_6_1 | Bra019 | 12 |    |   |    |      |      | GACGGUUUGGCCGAGU | UGAGACUACUUGGUCC  | Cleava |   |
| 52      | 760    | 3  | .5 | 1 | 23 | 1328 | 1350 | GGUCUAA          | AGCCGUC           | ge     | 1 |
| trf_6_1 | Bra000 | 16 |    |   |    |      |      | GACGGUUUGGCCGAGU | AACCAUUCGCGCCAAAU | Cleava |   |
| 52      | 788    | 3  | .6 | 1 | 20 | 52   | 71   | GGUC             | GUC               | ge     | 1 |
| trf_6_1 | Bra003 | 24 |    |   |    |      |      | GACGGUUUGGCCGAGU | GGCGAUUCGCGCCAAAU | Cleava |   |
| 52      | 534    | 3  | .7 | 1 | 20 | 3589 | 3608 | GGUC             | UGUC              | ge     | 1 |
| trf_6_1 | Bra002 | 10 |    |   |    |      |      | GACGGUUUGGCCGAGU | GACUUUCCGCGCCAAAC | Cleava |   |
| 52      | 609    | 3  | .2 | 1 | 20 | 1237 | 1256 | GGUC             | CGUC              | ge     | 1 |

|         |        |     |    |   |    |      |      |                  |                  |        |   |
|---------|--------|-----|----|---|----|------|------|------------------|------------------|--------|---|
| trf_6_1 | Bra007 | 14  |    |   |    |      |      | GCACCAGUGGUCUAGU | UACUACUGGACCUUUG | Cleava |   |
| 55      | 154    | 2.5 | .1 | 1 | 20 | 511  | 530  | GGUA             | GUGC             | ge     | 1 |
| trf_6_1 | Bra013 | 22  |    |   |    |      |      | UCCGUUGUAGUCUAGC | CAUCAUCAGCUUGGCU | Cleava |   |
| 57      | 528    | 3   | .0 | 1 | 24 | 196  | 219  | UGGUCAGG         | AUAACGGG         | ge     | 1 |
| trf_6_1 | Bra024 | 7.  |    |   |    |      |      | GGGGAUGUAGCUCAAA | UCCAACAUUUCGGUUA | Cleava |   |
| 59      | 638    | 3   | 5  | 1 | 23 | 203  | 225  | UGGUAGA          | CAUCCCC          | ge     | 1 |
| trf_6_1 | Bra025 | 17  |    |   |    |      |      | GGGGAUGUAGCUCAAA | ACAAUUUGAGCUUCAU | Cleava |   |
| 59      | 904    | 3   | .2 | 1 | 20 | 344  | 363  | UGGU             | CUUC             | ge     | 1 |
| trf_6_1 | Bra020 | 12  |    |   |    |      |      | GGGGAUGUAGCUCAAA | GCCAUUGGAGCUAUAU | Cleava |   |
| 60      | 755    | 3   | .6 | 1 | 20 | 454  | 473  | UGGU             | UCUC             | ge     | 1 |
| trf_6_1 | Bra025 | 17  |    |   |    |      |      | GGGGAUGUAGCUCAAA | ACAAUUUGAGCUUCAU | Cleava |   |
| 60      | 904    | 3   | .2 | 1 | 20 | 344  | 363  | UGGU             | CUUC             | ge     | 1 |
| trf_6_1 | Bra024 | 7.  |    |   |    |      |      | GGGGAUGUAGCUCAAA | AACAUUUCGGUUACAU | Cleava |   |
| 60      | 638    | 3   | 5  | 1 | 20 | 206  | 225  | UGGU             | CCCC             | ge     | 1 |
| trf_6_1 | Bra016 | 9.  |    |   |    |      |      | GUCGUUGUAGUAUAG  | UACUAUUUACUACAA  | Cleava |   |
| 61      | 584    | 3   | 9  | 1 | 20 | 1045 | 1064 | UGGUA            | AGGC             | ge     | 1 |
| trf_6_1 | Bra035 | 10  |    |   |    |      |      | GUCGUUGUAGUAUAG  | UACCACAAUACUUCAA | Cleava |   |
| 61      | 409    | 3   | .4 | 1 | 20 | 1328 | 1347 | UGGUA            | CGAG             | ge     | 1 |
| trf_6_1 | Bra016 | 9.  |    |   |    |      |      | GUCGUUGUAGUAUAG  | UACUAUUUACUACAA  | Cleava |   |
| 62      | 584    | 3   | 9  | 1 | 20 | 1045 | 1064 | UGGUA            | AGGC             | ge     | 1 |
| trf_6_1 | Bra035 | 10  |    |   |    |      |      | GUCGUUGUAGUAUAG  | UACCACAAUACUUCAA | Cleava |   |
| 62      | 409    | 3   | .4 | 1 | 20 | 1328 | 1347 | UGGUA            | CGAG             | ge     | 1 |
| trf_6_1 | Bra016 | 9.  |    |   |    |      |      | GUCGUUGUAGUAUAG  | UACUAUUUACUACAA  | Cleava |   |
| 63      | 584    | 3   | 9  | 1 | 20 | 1045 | 1064 | UGGUA            | AGGC             | ge     | 1 |
| trf_6_1 | Bra035 | 10  |    |   |    |      |      | GUCGUUGUAGUAUAG  | UACCACAAUACUUCAA | Cleava |   |
| 63      | 409    | 3   | .4 | 1 | 20 | 1328 | 1347 | UGGUA            | CGAG             | ge     | 1 |
| trf_6_1 | Bra016 | 9.  |    |   |    |      |      | GUCGUUGUAGUAUAG  | UACUAUUUACUACAA  | Cleava |   |
| 64      | 584    | 3   | 9  | 1 | 20 | 1045 | 1064 | UGGUA            | AGGC             | ge     | 1 |
| trf_6_1 | Bra035 | 10  |    |   |    |      |      | GUCGUUGUAGUAUAG  | UACCACAAUACUUCAA | Cleava |   |
| 64      | 409    | 3   | .4 | 1 | 20 | 1328 | 1347 | UGGUA            | CGAG             | ge     | 1 |
| trf_6_1 | Bra016 | 9.  |    |   |    |      |      | GUCGUUGUAGUAUAG  | UACUAUUUACUACAA  | Cleava |   |
| 65      | 584    | 3   | 9  | 1 | 20 | 1045 | 1064 | UGGUA            | AGGC             | ge     | 1 |
| trf_6_1 | Bra035 | 10  |    |   |    |      |      | GUCGUUGUAGUAUAG  | UACCACAAUACUUCAA | Cleava |   |
| 65      | 409    | 3   | .4 | 1 | 20 | 1328 | 1347 | UGGUA            | CGAG             | ge     | 1 |



|         |        |     |    |   |    |      |      |                  |                   |        |   |
|---------|--------|-----|----|---|----|------|------|------------------|-------------------|--------|---|
| trf_6_1 | Bra016 | 9.  |    |   |    |      |      | GUCGUUGUAGUUAUAG | UACUAUUUAUACUACAA | Cleava |   |
| 66      | 584    | 3   | 9  | 1 | 20 | 1045 | 1064 | UGGUA            | AGGC              | ge     | 1 |
| trf_6_1 | Bra035 | 10  |    |   |    |      |      | GUCGUUGUAGUUAUAG | UACCACAAUACUUCAA  | Cleava |   |
| 66      | 409    | 3   | .4 | 1 | 20 | 1328 | 1347 | UGGUA            | CGAG              | ge     | 1 |
| trf_6_1 | Bra016 | 9.  |    |   |    |      |      | GUCGUUGUAGUUAUAG | UACUAUUUAUACUACAA | Cleava |   |
| 67      | 584    | 3   | 9  | 1 | 20 | 1045 | 1064 | UGGUA            | AGGC              | ge     | 1 |
| trf_6_1 | Bra035 | 10  |    |   |    |      |      | GUCGUUGUAGUUAUAG | UACCACAAUACUUCAA  | Cleava |   |
| 67      | 409    | 3   | .4 | 1 | 20 | 1328 | 1347 | UGGUA            | CGAG              | ge     | 1 |
| trf_6_1 | Bra016 | 9.  |    |   |    |      |      | GUCGUUGUAGUUAUAG | UACUAUUUAUACUACAA | Cleava |   |
| 68      | 584    | 3   | 9  | 1 | 20 | 1045 | 1064 | UGGUA            | AGGC              | ge     | 1 |
| trf_6_1 | Bra035 | 10  |    |   |    |      |      | GUCGUUGUAGUUAUAG | UACCACAAUACUUCAA  | Cleava |   |
| 68      | 409    | 3   | .4 | 1 | 20 | 1328 | 1347 | UGGUA            | CGAG              | ge     | 1 |
| trf_6_1 | Bra009 | 14  |    |   |    |      |      | GGGGAUGUAGCUCAGA | UUAUCAUCUGGGCUUC  | Cleava |   |
| 69      | 876    | 3   | .9 | 1 | 22 | 16   | 37   | UGGUAG           | GUCCUC            | ge     | 1 |
| trf_6_1 | Bra016 | 10  |    |   |    |      |      | GGGGAUGUAGCUCAGA | UUAUCAUCUGAGCUUC  | Cleava |   |
| 69      | 141    | 3   | .4 | 1 | 22 | 3031 | 3052 | UGGUAG           | GUUCUC            | ge     | 1 |
| trf_6_1 | Bra036 | 20  |    |   |    |      |      | GGGGAUGUAGCUCAGA | UCGACUGGCUGAGCUA  | Cleava |   |
| 69      | 771    | 3   | .2 | 1 | 23 | 5375 | 5397 | UGGUAGA          | CAUUCCU           | ge     | 1 |
| trf_6_1 | Bra018 | 8.  |    |   |    |      |      | GGGGAUGUAGCUCAGA | GCCACCUCAGCUACAUC | Cleava |   |
| 69      | 620    | 3   | 3  | 1 | 20 | 7    | 26   | UGGU             | CUC               | ge     | 1 |
| trf_6_1 | Bra013 | 22  |    |   |    |      |      | UCCGUUGUAGUCUAGC | CAUCAUCAGCUUGGCU  | Cleava |   |
| 70      | 528    | 3   | .0 | 1 | 24 | 196  | 219  | UGGUCAGG         | AUAACGGG          | ge     | 1 |
| trf_6_1 | Bra007 | 14  |    |   |    |      |      | GCACCAGUGGUCUAGU | UACUACUGGACCUUUG  | Cleava |   |
| 71      | 154    | 2.5 | .1 | 1 | 20 | 511  | 530  | GGUA             | GUGC              | ge     | 1 |
| trf_6_1 | Bra007 | 14  |    |   |    |      |      | GCACCAGUGGUCUAGU | UACUACUGGACCUUUG  | Cleava |   |
| 75      | 154    | 2.5 | .1 | 1 | 20 | 511  | 530  | GGUA             | GUGC              | ge     | 1 |
| trf_6_1 | Bra005 | 12  |    |   |    |      |      | GUGGCUGUAGUUUAG  | CUCACCGCUGAACUAU  | Cleava |   |
| 85      | 511    | 2.5 | .8 | 1 | 22 | 1113 | 1134 | UGGUGAG          | GGCUAC            | ge     | 1 |
| trf_6_1 | Bra035 | 17  |    |   |    |      |      | GUGGCUGUAGUUUAG  | UAUUCAUCUCUAGGCU  | Cleava |   |
| 85      | 454    | 3   | .9 | 1 | 24 | 1241 | 1264 | UGGUGAGAA        | ACAGCCAU          | ge     | 1 |
| trf_6_1 | Bra009 | 12  |    |   |    |      |      | GUGGCUGUAGUUUAG  | CAACAUUGAGCUACAG  | Cleava |   |
| 85      | 047    | 3   | .1 | 1 | 20 | 243  | 262  | UGGUG            | CCAU              | ge     | 1 |
| trf_6_1 | Bra026 | 21  |    |   |    |      |      | GCCGAUGUCGUCCAGC | GUCGAAACCGUGGGGU  | Cleava |   |
| 89      | 941    | 3   | .9 | 1 | 25 | 3    | 27   | GGUUAGGAU        | GAUAUCGGC         | ge     | 1 |

|         |        |     |    |   |    |      |      |                  |                   |        |   |
|---------|--------|-----|----|---|----|------|------|------------------|-------------------|--------|---|
| trf_6_1 | Bra014 | 21  |    |   |    |      |      | GCCGAUGUCGUCCAGC | CCAACCGCUG-       | Cleava |   |
| 89      | 566    | 2.5 | .7 | 1 | 22 | 538  | 558  | GGUUAG           | ACGACAUUGGC       | ge     | 1 |
| trf_6_1 | Bra016 | 9.  |    |   |    |      |      | GUCGUUGUAGUUAUAG | UACUAAUUAUACUACAA | Cleava |   |
| 90      | 584    | 3   | 9  | 1 | 20 | 1045 | 1064 | UGGUA            | AGGC              | ge     | 1 |
| trf_6_1 | Bra035 | 10  |    |   |    |      |      | GUCGUUGUAGUUAUAG | UACCACAAUACUUCAA  | Cleava |   |
| 90      | 409    | 3   | .4 | 1 | 20 | 1328 | 1347 | UGGUA            | CGAG              | ge     | 1 |
| trf_6_1 | Bra016 | 9.  |    |   |    |      |      | GUCGUUGUAGUUAUAG | UACUAAUUAUACUACAA | Cleava |   |
| 91      | 584    | 3   | 9  | 1 | 20 | 1045 | 1064 | UGGUA            | AGGC              | ge     | 1 |
| trf_6_1 | Bra035 | 10  |    |   |    |      |      | GUCGUUGUAGUUAUAG | UACCACAAUACUUCAA  | Cleava |   |
| 91      | 409    | 3   | .4 | 1 | 20 | 1328 | 1347 | UGGUA            | CGAG              | ge     | 1 |
| trf_6_1 | Bra016 | 9.  |    |   |    |      |      | GUCGUUGUAGUUAUAG | UACUAAUUAUACUACAA | Cleava |   |
| 92      | 584    | 3   | 9  | 1 | 20 | 1045 | 1064 | UGGUA            | AGGC              | ge     | 1 |
| trf_6_1 | Bra035 | 10  |    |   |    |      |      | GUCGUUGUAGUUAUAG | UACCACAAUACUUCAA  | Cleava |   |
| 92      | 409    | 3   | .4 | 1 | 20 | 1328 | 1347 | UGGUA            | CGAG              | ge     | 1 |
| trf_6_1 | Bra016 | 9.  |    |   |    |      |      | GUCGUUGUAGUUAUAG | UACUAAUUAUACUACAA | Cleava |   |
| 93      | 584    | 3   | 9  | 1 | 20 | 1045 | 1064 | UGGUA            | AGGC              | ge     | 1 |
| trf_6_1 | Bra035 | 10  |    |   |    |      |      | GUCGUUGUAGUUAUAG | UACCACAAUACUUCAA  | Cleava |   |
| 93      | 409    | 3   | .4 | 1 | 20 | 1328 | 1347 | UGGUA            | CGAG              | ge     | 1 |
| trf_6_1 | Bra007 | 14  |    |   |    |      |      | GCACCAGUGGUCUAGU | UACUACUGGACCUUUG  | Cleava |   |
| 95      | 154    | 2.5 | .1 | 1 | 20 | 511  | 530  | GGUA             | GUGC              | ge     | 1 |
| trf_6_1 | Bra009 | 14  |    |   |    |      |      | GGGGAUGUAGCUCAGA | UUAUCAUCUGGGCUUC  | Cleava |   |
| 96      | 876    | 3   | .9 | 1 | 22 | 16   | 37   | UGGUAG           | GUCCUC            | ge     | 1 |
| trf_6_1 | Bra016 | 10  |    |   |    |      |      | GGGGAUGUAGCUCAGA | UUAUCAUCUGAGCUUC  | Cleava |   |
| 96      | 141    | 3   | .4 | 1 | 22 | 3031 | 3052 | UGGUAG           | GUUCUC            | ge     | 1 |
| trf_6_1 | Bra036 | 20  |    |   |    |      |      | GGGGAUGUAGCUCAGA | UCGACUGGCUGAGCUA  | Cleava |   |
| 96      | 771    | 3   | .2 | 1 | 23 | 5375 | 5397 | UGGUAGA          | CAUUCCU           | ge     | 1 |
| trf_6_1 | Bra018 | 8.  |    |   |    |      |      | GGGGAUGUAGCUCAGA | GCCACCUCAGCUACAUC | Cleava |   |
| 96      | 620    | 3   | 3  | 1 | 20 | 7    | 26   | UGGU             | CUC               | ge     | 1 |
| trf_6_1 | Bra007 | 14  |    |   |    |      |      | GCACCAGUGGUCUAGU | UACUACUGGACCUUUG  | Cleava |   |
| 97      | 154    | 2.5 | .1 | 1 | 20 | 511  | 530  | GGUA             | GUGC              | ge     | 1 |
| trf_6_1 | Bra013 | 22  |    |   |    |      |      | UCCGUUGUAGUCUAGC | CAUCAUCAGCUUGGCU  | Cleava |   |
| 99      | 528    | 3   | .0 | 1 | 24 | 196  | 219  | UGGUCAGG         | AUAACGGG          | ge     | 1 |
| trf_6_2 | Bra007 | 14  |    |   |    |      |      | GCACCAGUGGUCUAGU | UACUACUGGACCUUUG  | Cleava |   |
| 00      | 154    | 2.5 | .1 | 1 | 20 | 511  | 530  | GGUA             | GUGC              | ge     | 1 |

|         |        |     |    |   |    |      |      |                  |                   |        |   |
|---------|--------|-----|----|---|----|------|------|------------------|-------------------|--------|---|
| trf_6_2 | Bra007 | 14  |    |   |    |      |      | GCACCAGUGGUCUAGU | UUACUACUGGACCUUU  | Cleava |   |
| 02      | 154    | 2.5 | .1 | 1 | 21 | 510  | 530  | GGUAG            | GGUGC             | ge     | 1 |
| trf_6_2 | Bra036 | 20  |    |   |    |      |      | GGGGAUGUAGCUCAGA | CUCGACUGGCUGAGCU  | Cleava |   |
| 03      | 771    | 3   | .2 | 1 | 24 | 5374 | 5397 | UGGUAGAG         | ACAUUCCU          | ge     | 1 |
| trf_6_2 | Bra009 | 14  |    |   |    |      |      | GGGGAUGUAGCUCAGA | CGUUAUCAUCUGGGCU  | Cleava |   |
| 03      | 876    | 3   | .9 | 1 | 24 | 14   | 37   | UGGUAGAG         | UCGUCCUC          | ge     | 1 |
| trf_6_2 | Bra016 | 10  |    |   |    |      |      | GGGGAUGUAGCUCAGA | CAUUAUCAUCUGAGCU  | Cleava |   |
| 03      | 141    | 3   | .4 | 1 | 24 | 3029 | 3052 | UGGUAGAG         | UCGUUCUC          | ge     | 1 |
| trf_6_2 | Bra018 | 8.  |    |   |    |      |      | GGGGAUGUAGCUCAGA | GCCACCUCAGCUACAUC | Cleava |   |
| 03      | 620    | 3   | 3  | 1 | 20 | 7    | 26   | UGGU             | CUC               | ge     | 1 |
| trf_6_2 | Bra009 | 14  |    |   |    |      |      | GGGGAUGUAGCUCAGA | UUAUCAUCUGGGCUUC  | Cleava |   |
| 04      | 876    | 3   | .9 | 1 | 22 | 16   | 37   | UGGUAG           | GUCCUC            | ge     | 1 |
| trf_6_2 | Bra016 | 10  |    |   |    |      |      | GGGGAUGUAGCUCAGA | UUAUCAUCUGAGCUUC  | Cleava |   |
| 04      | 141    | 3   | .4 | 1 | 22 | 3031 | 3052 | UGGUAG           | GUUCUC            | ge     | 1 |
| trf_6_2 | Bra036 | 20  |    |   |    |      |      | GGGGAUGUAGCUCAGA | UCGACUGGCUGAGCUA  | Cleava |   |
| 04      | 771    | 3   | .2 | 1 | 23 | 5375 | 5397 | UGGUAGA          | CAUUCCU           | ge     | 1 |
| trf_6_2 | Bra018 | 8.  |    |   |    |      |      | GGGGAUGUAGCUCAGA | GCCACCUCAGCUACAUC | Cleava |   |
| 04      | 620    | 3   | 3  | 1 | 20 | 7    | 26   | UGGU             | CUC               | ge     | 1 |
| trf_6_2 | Bra009 | 14  |    |   |    |      |      | GGGGAUGUAGCUCAGA | UUAUCAUCUGGGCUUC  | Cleava |   |
| 12      | 876    | 3   | .9 | 1 | 22 | 16   | 37   | UGGUAG           | GUCCUC            | ge     | 1 |
| trf_6_2 | Bra016 | 10  |    |   |    |      |      | GGGGAUGUAGCUCAGA | UUAUCAUCUGAGCUUC  | Cleava |   |
| 12      | 141    | 3   | .4 | 1 | 22 | 3031 | 3052 | UGGUAG           | GUUCUC            | ge     | 1 |
| trf_6_2 | Bra036 | 20  |    |   |    |      |      | GGGGAUGUAGCUCAGA | UCGACUGGCUGAGCUA  | Cleava |   |
| 12      | 771    | 3   | .2 | 1 | 23 | 5375 | 5397 | UGGUAGA          | CAUUCCU           | ge     | 1 |
| trf_6_2 | Bra018 | 8.  |    |   |    |      |      | GGGGAUGUAGCUCAGA | GCCACCUCAGCUACAUC | Cleava |   |
| 12      | 620    | 3   | 3  | 1 | 20 | 7    | 26   | UGGU             | CUC               | ge     | 1 |
| trf_6_2 | Bra016 | 9.  |    |   |    |      |      | GUCGUUGUAGUUAUAG | UACUAAUUAUACUACAA | Cleava |   |
| 13      | 584    | 3   | 9  | 1 | 20 | 1045 | 1064 | UGGUA            | AGGC              | ge     | 1 |
| trf_6_2 | Bra035 | 10  |    |   |    |      |      | GUCGUUGUAGUUAUAG | UACCACAAUACUUCAA  | Cleava |   |
| 13      | 409    | 3   | .4 | 1 | 20 | 1328 | 1347 | UGGUA            | CGAG              | ge     | 1 |
| trf_6_2 | Bra016 | 9.  |    |   |    |      |      | GUCGUUGUAGUUAUAG | UACUAAUUAUACUACAA | Cleava |   |
| 14      | 584    | 3   | 9  | 1 | 20 | 1045 | 1064 | UGGUA            | AGGC              | ge     | 1 |
| trf_6_2 | Bra035 | 10  |    |   |    |      |      | GUCGUUGUAGUUAUAG | UACCACAAUACUUCAA  | Cleava |   |
| 14      | 409    | 3   | .4 | 1 | 20 | 1328 | 1347 | UGGUA            | CGAG              | ge     | 1 |

|         |        |     |    |   |    |      |      |                  |                    |        |   |
|---------|--------|-----|----|---|----|------|------|------------------|--------------------|--------|---|
| trf_6_2 | Bra016 | 9.  |    |   |    |      |      | GUCGUUGUAGUAUAG  | UACUAUUUUAUACUACAA | Cleava |   |
| 15      | 584    | 3   | 9  | 1 | 20 | 1045 | 1064 | UGGUA            | AGGC               | ge     | 1 |
| trf_6_2 | Bra035 | 10  |    |   |    |      |      | GUCGUUGUAGUAUAG  | UACCACAAUACUUCAA   | Cleava |   |
| 15      | 409    | 3   | .4 | 1 | 20 | 1328 | 1347 | UGGUA            | CGAG               | ge     | 1 |
| trf_6_2 | Bra002 | 16  |    |   |    |      |      | AGGGAUAUAACUCAGC | CUGCUGCUGAGUUCUA   | Cleava |   |
| 23      | 746    | 3   | .3 | 1 | 21 | 218  | 238  | GGUAG            | UCCCA              | ge     | 1 |
| trf_6_2 | Bra012 | 14  |    |   |    |      |      | AGGGAUAUAACUCAGC | UACCUUUGAGUUAUG    | Cleava |   |
| 23      | 734    | 3   | .1 | 1 | 20 | 1709 | 1728 | GGUA             | UUUCU              | ge     | 1 |
| trf_6_2 | Bra016 | 9.  |    |   |    |      |      | GUCGUUGUAGUAUAG  | UACUAUUUUAUACUACAA | Cleava |   |
| 24      | 584    | 3   | 9  | 1 | 20 | 1045 | 1064 | UGGUA            | AGGC               | ge     | 1 |
| trf_6_2 | Bra035 | 10  |    |   |    |      |      | GUCGUUGUAGUAUAG  | UACCACAAUACUUCAA   | Cleava |   |
| 24      | 409    | 3   | .4 | 1 | 20 | 1328 | 1347 | UGGUA            | CGAG               | ge     | 1 |
| trf_6_2 | Bra016 | 9.  |    |   |    |      |      | GUCGUUGUAGUAUAG  | UACUAUUUUAUACUACAA | Cleava |   |
| 25      | 584    | 3   | 9  | 1 | 20 | 1045 | 1064 | UGGUA            | AGGC               | ge     | 1 |
| trf_6_2 | Bra035 | 10  |    |   |    |      |      | GUCGUUGUAGUAUAG  | UACCACAAUACUUCAA   | Cleava |   |
| 25      | 409    | 3   | .4 | 1 | 20 | 1328 | 1347 | UGGUA            | CGAG               | ge     | 1 |
| trf_6_2 | Bra016 | 9.  |    |   |    |      |      | GUCGUUGUAGUAUAG  | UACUAUUUUAUACUACAA | Cleava |   |
| 26      | 584    | 3   | 9  | 1 | 20 | 1045 | 1064 | UGGUA            | AGGC               | ge     | 1 |
| trf_6_2 | Bra035 | 10  |    |   |    |      |      | GUCGUUGUAGUAUAG  | UACCACAAUACUUCAA   | Cleava |   |
| 26      | 409    | 3   | .4 | 1 | 20 | 1328 | 1347 | UGGUA            | CGAG               | ge     | 1 |
| trf_6_2 | Bra016 | 9.  |    |   |    |      |      | GUCGUUGUAGUAUAG  | UACUAUUUUAUACUACAA | Cleava |   |
| 27      | 584    | 3   | 9  | 1 | 20 | 1045 | 1064 | UGGUA            | AGGC               | ge     | 1 |
| trf_6_2 | Bra035 | 10  |    |   |    |      |      | GUCGUUGUAGUAUAG  | UACCACAAUACUUCAA   | Cleava |   |
| 27      | 409    | 3   | .4 | 1 | 20 | 1328 | 1347 | UGGUA            | CGAG               | ge     | 1 |
| trf_6_2 | Bra007 | 14  |    |   |    |      |      | GCACCAGUGGUCUAGU | UACUACUGGACCUUUG   | Cleava |   |
| 28      | 154    | 2.5 | .1 | 1 | 20 | 511  | 530  | GGUA             | GUGC               | ge     | 1 |
| trf_6_2 | Bra013 | 22  |    |   |    |      |      | UCCGUUGUAGUCUAGC | CAUCAUCAGCUUGGCU   | Cleava |   |
| 30      | 528    | 3   | .0 | 1 | 24 | 196  | 219  | UGGUCAGG         | AUAACGGG           | ge     | 1 |
| trf_6_2 | Bra016 | 9.  |    |   |    |      |      | GUCGUUGUAGUAUAG  | UACUAUUUUAUACUACAA | Cleava |   |
| 39      | 584    | 3   | 9  | 1 | 20 | 1045 | 1064 | UGGUA            | AGGC               | ge     | 1 |
| trf_6_2 | Bra035 | 10  |    |   |    |      |      | GUCGUUGUAGUAUAG  | UACCACAAUACUUCAA   | Cleava |   |
| 39      | 409    | 3   | .4 | 1 | 20 | 1328 | 1347 | UGGUA            | CGAG               | ge     | 1 |
| trf_6_2 | Bra016 | 9.  |    |   |    |      |      | GUCGUUGUAGUAUAG  | UACUAUUUUAUACUACAA | Cleava |   |
| 40      | 584    | 3   | 9  | 1 | 20 | 1045 | 1064 | UGGUA            | AGGC               | ge     | 1 |

|         |        |     |    |   |    |      |      |                  |                   |        |   |
|---------|--------|-----|----|---|----|------|------|------------------|-------------------|--------|---|
| trf_6_2 | Bra035 | 10  |    |   |    |      |      | GUCGUUGUAGUAG    | UACCACAAUACUCAA   | Cleava |   |
| 40      | 409    | 3   | .4 | 1 | 20 | 1328 | 1347 | UGGUA            | CGAG              | ge     | 1 |
| trf_6_2 | Bra016 | 9.  |    |   |    |      |      | GUCGUUGUAGUAG    | UACUAAUUAUACUACAA | Cleava |   |
| 41      | 584    | 3   | 9  | 1 | 20 | 1045 | 1064 | UGGUA            | AGGC              | ge     | 1 |
| trf_6_2 | Bra035 | 10  |    |   |    |      |      | GUCGUUGUAGUAG    | UACCACAAUACUCAA   | Cleava |   |
| 41      | 409    | 3   | .4 | 1 | 20 | 1328 | 1347 | UGGUA            | CGAG              | ge     | 1 |
| trf_6_2 | Bra016 | 9.  |    |   |    |      |      | GUCGUUGUAGUAG    | UACUAAUUAUACUACAA | Cleava |   |
| 42      | 584    | 3   | 9  | 1 | 20 | 1045 | 1064 | UGGUA            | AGGC              | ge     | 1 |
| trf_6_2 | Bra035 | 10  |    |   |    |      |      | GUCGUUGUAGUAG    | UACCACAAUACUCAA   | Cleava |   |
| 42      | 409    | 3   | .4 | 1 | 20 | 1328 | 1347 | UGGUA            | CGAG              | ge     | 1 |
| trf_6_2 | Bra016 | 9.  |    |   |    |      |      | GUCGUUGUAGUAG    | UACUAAUUAUACUACAA | Cleava |   |
| 43      | 584    | 3   | 9  | 1 | 20 | 1045 | 1064 | UGGUA            | AGGC              | ge     | 1 |
| trf_6_2 | Bra035 | 10  |    |   |    |      |      | GUCGUUGUAGUAG    | UACCACAAUACUCAA   | Cleava |   |
| 43      | 409    | 3   | .4 | 1 | 20 | 1328 | 1347 | UGGUA            | CGAG              | ge     | 1 |
| trf_6_2 | Bra000 | 11  |    |   |    |      |      | UCCGUUAUCGUCCAGC | UAACCGGAGGACGAUA  | Cleava |   |
| 45      | 529    | 2.5 | .2 | 1 | 21 | 984  | 1004 | GGUUA            | AUGGA             | ge     | 1 |
| trf_6_2 | Bra032 | 22  |    |   |    |      |      | UCCGUUAUCGUCCAGC | GACGGCUUGACGAUGA  | Cleava |   |
| 45      | 111    | 3   | .4 | 1 | 20 | 727  | 746  | GGUU             | CGGA              | ge     | 1 |
| trf_6_2 | Bra000 | 11  |    |   |    |      |      | UCCGUUAUCGUCCAGC | AACCGGAGGACGAUAA  | Cleava |   |
| 46      | 529    | 2.5 | .2 | 1 | 20 | 985  | 1004 | GGUU             | UGGA              | ge     | 1 |
| trf_6_2 | Bra032 | 22  |    |   |    |      |      | UCCGUUAUCGUCCAGC | GACGGCUUGACGAUGA  | Cleava |   |
| 46      | 111    | 3   | .4 | 1 | 20 | 727  | 746  | GGUU             | CGGA              | ge     | 1 |
| trf_6_2 | Bra000 | 11  |    |   |    |      |      | UCCGUUAUCGUCCAGC | UAACCGGAGGACGAUA  | Cleava |   |
| 47      | 529    | 2.5 | .2 | 1 | 21 | 984  | 1004 | GGUUA            | AUGGA             | ge     | 1 |
| trf_6_2 | Bra032 | 22  |    |   |    |      |      | UCCGUUAUCGUCCAGC | GACGGCUUGACGAUGA  | Cleava |   |
| 47      | 111    | 3   | .4 | 1 | 20 | 727  | 746  | GGUU             | CGGA              | ge     | 1 |
| trf_6_2 | Bra000 | 11  |    |   |    |      |      | UCCGUUAUCGUCCAGC | UAACCGGAGGACGAUA  | Cleava |   |
| 48      | 529    | 2.5 | .2 | 1 | 21 | 984  | 1004 | GGUUA            | AUGGA             | ge     | 1 |
| trf_6_2 | Bra032 | 22  |    |   |    |      |      | UCCGUUAUCGUCCAGC | GACGGCUUGACGAUGA  | Cleava |   |
| 48      | 111    | 3   | .4 | 1 | 20 | 727  | 746  | GGUU             | CGGA              | ge     | 1 |
| trf_6_2 | Bra016 | 9.  |    |   |    |      |      | GUCGUUGUAGUAG    | UACUAAUUAUACUACAA | Cleava |   |
| 49      | 584    | 3   | 9  | 1 | 20 | 1045 | 1064 | UGGUA            | AGGC              | ge     | 1 |
| trf_6_2 | Bra035 | 10  |    |   |    |      |      | GUCGUUGUAGUAG    | UACCACAAUACUCAA   | Cleava |   |
| 49      | 409    | 3   | .4 | 1 | 20 | 1328 | 1347 | UGGUA            | CGAG              | ge     | 1 |

|         |        |     |    |   |    |      |      |                  |                   |        |   |
|---------|--------|-----|----|---|----|------|------|------------------|-------------------|--------|---|
| trf_6_2 | Bra016 |     | 9. |   |    |      |      | GUCGUUGUAGUAG    | UACUAUUAUACUACAA  | Cleava |   |
| 50      | 584    | 3   | 9  | 1 | 20 | 1045 | 1064 | UGGUA            | AGGC              | ge     | 1 |
| trf_6_2 | Bra035 |     | 10 |   |    |      |      | GUCGUUGUAGUAG    | UACCACAAUACUUCAA  | Cleava |   |
| 50      | 409    | 3   | .4 | 1 | 20 | 1328 | 1347 | UGGUA            | CGAG              | ge     | 1 |
| trf_6_2 | Bra016 |     | 9. |   |    |      |      | GUCGUUGUAGUAG    | UACUAUUAUACUACAA  | Cleava |   |
| 51      | 584    | 3   | 9  | 1 | 20 | 1045 | 1064 | UGGUA            | AGGC              | ge     | 1 |
| trf_6_2 | Bra035 |     | 10 |   |    |      |      | GUCGUUGUAGUAG    | UACCACAAUACUUCAA  | Cleava |   |
| 51      | 409    | 3   | .4 | 1 | 20 | 1328 | 1347 | UGGUA            | CGAG              | ge     | 1 |
| trf_6_2 | Bra016 |     | 9. |   |    |      |      | GUCGUUGUAGUAG    | UACUAUUAUACUACAA  | Cleava |   |
| 52      | 584    | 3   | 9  | 1 | 20 | 1045 | 1064 | UGGUA            | AGGC              | ge     | 1 |
| trf_6_2 | Bra035 |     | 10 |   |    |      |      | GUCGUUGUAGUAG    | UACCACAAUACUUCAA  | Cleava |   |
| 52      | 409    | 3   | .4 | 1 | 20 | 1328 | 1347 | UGGUA            | CGAG              | ge     | 1 |
| trf_6_2 | Bra009 |     | 14 |   |    |      |      | GGGGAUGUAGCUCAGA | UUAUCAUCUGGGCUUC  | Cleava |   |
| 53      | 876    | 3   | .9 | 1 | 22 | 16   | 37   | UGGUAG           | GUCCUC            | ge     | 1 |
| trf_6_2 | Bra016 |     | 10 |   |    |      |      | GGGGAUGUAGCUCAGA | UUAUCAUCUGAGCUUC  | Cleava |   |
| 53      | 141    | 3   | .4 | 1 | 22 | 3031 | 3052 | UGGUAG           | GUUCUC            | ge     | 1 |
| trf_6_2 | Bra036 |     | 20 |   |    |      |      | GGGGAUGUAGCUCAGA | UCGACUGGCUGAGCUA  | Cleava |   |
| 53      | 771    | 3   | .2 | 1 | 23 | 5375 | 5397 | UGGUAGA          | CAUUCCU           | ge     | 1 |
| trf_6_2 | Bra018 |     | 8. |   |    |      |      | GGGGAUGUAGCUCAGA | GCCACCUCAGCUACAUC | Cleava |   |
| 53      | 620    | 3   | 3  | 1 | 20 | 7    | 26   | UGGU             | CUC               | ge     | 1 |
| trf_6_2 | Bra009 |     | 14 |   |    |      |      | GGGGAUGUAGCUCAGA | UUAUCAUCUGGGCUUC  | Cleava |   |
| 62      | 876    | 3   | .9 | 1 | 22 | 16   | 37   | UGGUAG           | GUCCUC            | ge     | 1 |
| trf_6_2 | Bra016 |     | 10 |   |    |      |      | GGGGAUGUAGCUCAGA | UUAUCAUCUGAGCUUC  | Cleava |   |
| 62      | 141    | 3   | .4 | 1 | 22 | 3031 | 3052 | UGGUAG           | GUUCUC            | ge     | 1 |
| trf_6_2 | Bra036 |     | 20 |   |    |      |      | GGGGAUGUAGCUCAGA | UCGACUGGCUGAGCUA  | Cleava |   |
| 62      | 771    | 3   | .2 | 1 | 23 | 5375 | 5397 | UGGUAGA          | CAUUCCU           | ge     | 1 |
| trf_6_2 | Bra018 |     | 8. |   |    |      |      | GGGGAUGUAGCUCAGA | GCCACCUCAGCUACAUC | Cleava |   |
| 62      | 620    | 3   | 3  | 1 | 20 | 7    | 26   | UGGU             | CUC               | ge     | 1 |
| trf_6_2 | Bra007 |     | 14 |   |    |      |      | GCACCAGUGGUCUAGU | UACUACUGGACCUUUG  | Cleava |   |
| 65      | 154    | 2.5 | .1 | 1 | 20 | 511  | 530  | GGUA             | GUGC              | ge     | 1 |
| trf_6_2 | Bra007 |     | 14 |   |    |      |      | GCACCAGUGGUCUAGU | UACUACUGGACCUUUG  | Cleava |   |
| 66      | 154    | 2.5 | .1 | 1 | 20 | 511  | 530  | GGUA             | GUGC              | ge     | 1 |
| trf_6_2 | Bra007 |     | 14 |   |    |      |      | GCACCAGUGGUCUAGU | UUACUACUGGACCUUU  | Cleava |   |
| 68      | 154    | 2.5 | .1 | 1 | 21 | 510  | 530  | GGUAG            | GGUGC             | ge     | 1 |

|         |        |    |    |   |    |      |      |                  |                  |        |   |
|---------|--------|----|----|---|----|------|------|------------------|------------------|--------|---|
| trf_6_2 | Bra016 | 9. |    |   |    |      |      | GUCGUUGUAGUAG    | UACUAUUAUACUACAA | Cleava |   |
| 78      | 584    | 3  | 9  | 1 | 20 | 1045 | 1064 | UGGUA            | AGGC             | ge     | 1 |
| trf_6_2 | Bra035 | 10 |    |   |    |      |      | GUCGUUGUAGUAG    | UACCACAAUACUUCAA | Cleava |   |
| 78      | 409    | 3  | .4 | 1 | 20 | 1328 | 1347 | UGGUA            | CGAG             | ge     | 1 |
| trf_6_2 | Bra016 | 9. |    |   |    |      |      | GUCGUUGUAGUAG    | UACUAUUAUACUACAA | Cleava |   |
| 79      | 584    | 3  | 9  | 1 | 20 | 1045 | 1064 | UGGUA            | AGGC             | ge     | 1 |
| trf_6_2 | Bra035 | 10 |    |   |    |      |      | GUCGUUGUAGUAG    | UACCACAAUACUUCAA | Cleava |   |
| 79      | 409    | 3  | .4 | 1 | 20 | 1328 | 1347 | UGGUA            | CGAG             | ge     | 1 |
| trf_6_2 | Bra016 | 9. |    |   |    |      |      | GUCGUUGUAGUAG    | UACUAUUAUACUACAA | Cleava |   |
| 80      | 584    | 3  | 9  | 1 | 20 | 1045 | 1064 | UGGUA            | AGGC             | ge     | 1 |
| trf_6_2 | Bra035 | 10 |    |   |    |      |      | GUCGUUGUAGUAG    | UACCACAAUACUUCAA | Cleava |   |
| 80      | 409    | 3  | .4 | 1 | 20 | 1328 | 1347 | UGGUA            | CGAG             | ge     | 1 |
| trf_6_2 | Bra016 | 9. |    |   |    |      |      | GUCGUUGUAGUAG    | UACUAUUAUACUACAA | Cleava |   |
| 81      | 584    | 3  | 9  | 1 | 20 | 1045 | 1064 | UGGUA            | AGGC             | ge     | 1 |
| trf_6_2 | Bra035 | 10 |    |   |    |      |      | GUCGUUGUAGUAG    | UACCACAAUACUUCAA | Cleava |   |
| 81      | 409    | 3  | .4 | 1 | 20 | 1328 | 1347 | UGGUA            | CGAG             | ge     | 1 |
| trf_6_2 | Bra016 | 9. |    |   |    |      |      | GUCGUUGUAGUAG    | UACUAUUAUACUACAA | Cleava |   |
| 82      | 584    | 3  | 9  | 1 | 20 | 1045 | 1064 | UGGUA            | AGGC             | ge     | 1 |
| trf_6_2 | Bra035 | 10 |    |   |    |      |      | GUCGUUGUAGUAG    | UACCACAAUACUUCAA | Cleava |   |
| 82      | 409    | 3  | .4 | 1 | 20 | 1328 | 1347 | UGGUA            | CGAG             | ge     | 1 |
| trf_6_2 | Bra013 | 16 |    |   |    |      |      | UCCGUUGUCGUCCAGC | UAUGAUAACCGAUGGA | Cleava |   |
| 84      | 584    | 3  | .4 | 1 | 26 | 885  | 910  | GGUUAGGAUA       | UGUCAAUGGA       | ge     | 1 |
| trf_6_2 | Bra000 | 11 |    |   |    |      |      | UCCGUUGUCGUCCAGC | UAACCGGAGGACGAUA | Cleava |   |
| 84      | 529    | 3  | .2 | 1 | 21 | 984  | 1004 | GGUUA            | AUGGA            | ge     | 1 |
| trf_6_2 | Bra013 | 16 |    |   |    |      |      | UCCGUUGUCGUCCAGC | AACCGAUGGAUGUCA  | Cleava |   |
| 85      | 584    | 3  | .4 | 1 | 20 | 891  | 910  | GGUU             | UGGA             | ge     | 1 |
| trf_6_2 | Bra000 | 11 |    |   |    |      |      | UCCGUUGUCGUCCAGC | AACCGGAGGACGAUAA | Cleava |   |
| 85      | 529    | 3  | .2 | 1 | 20 | 985  | 1004 | GGUU             | UGGA             | ge     | 1 |
| trf_6_2 | Bra013 | 16 |    |   |    |      |      | UCCGUUGUCGUCCAGC | UAACCGAUGGAUGUCA | Cleava |   |
| 86      | 584    | 3  | .4 | 1 | 21 | 890  | 910  | GGUUA            | AUGGA            | ge     | 1 |
| trf_6_2 | Bra000 | 11 |    |   |    |      |      | UCCGUUGUCGUCCAGC | UAACCGGAGGACGAUA | Cleava |   |
| 86      | 529    | 3  | .2 | 1 | 21 | 984  | 1004 | GGUUA            | AUGGA            | ge     | 1 |
| trf_6_2 | Bra013 | 16 |    |   |    |      |      | UCCGUUGUCGUCCAGC | AUGAUAACCGAUGGAU | Cleava |   |
| 87      | 584    | 3  | .4 | 1 | 25 | 886  | 910  | GGUUAGGAU        | GUCAAUGGA        | ge     | 1 |

|         |        |     |    |   |    |      |      |                  |                   |        |   |
|---------|--------|-----|----|---|----|------|------|------------------|-------------------|--------|---|
| trf_6_2 | Bra000 | 11  |    |   |    |      |      | UCCGUUGUCGUCCAGC | UAACCGGAGGACGAUA  | Cleava |   |
| 87      | 529    | 3   | .2 | 1 | 21 | 984  | 1004 | GGUUA            | AUGGA             | ge     | 1 |
| trf_6_2 | Bra013 | 16  |    |   |    |      |      | UCCGUUGUCGUCCAGC | UAUGAUAACCGAUGGA  | Cleava |   |
| 88      | 584    | 3   | .4 | 1 | 26 | 885  | 910  | GGUUAGGAUA       | UGUCA AUGGA       | ge     | 1 |
| trf_6_2 | Bra000 | 11  |    |   |    |      |      | UCCGUUGUCGUCCAGC | UAACCGGAGGACGAUA  | Cleava |   |
| 88      | 529    | 3   | .2 | 1 | 21 | 984  | 1004 | GGUUA            | AUGGA             | ge     | 1 |
| trf_6_2 | Bra007 | 14  |    |   |    |      |      | GCACCAGUGGUCUAGU | UACUACUGGACCUUUG  | Cleava |   |
| 89      | 154    | 2.5 | .1 | 1 | 20 | 511  | 530  | GGUA             | GUGC              | ge     | 1 |
| trf_6_2 | Bra007 | 14  |    |   |    |      |      | GCACCAGUGGUCUAGU | UACUACUGGACCUUUG  | Cleava |   |
| 91      | 154    | 2.5 | .1 | 1 | 20 | 511  | 530  | GGUA             | GUGC              | ge     | 1 |
| trf_6_2 | Bra009 | 14  |    |   |    |      |      | GGGGAUGUAGCUCAGA | UUAUCAUCUGGGCUUC  | Cleava |   |
| 93      | 876    | 3   | .9 | 1 | 22 | 16   | 37   | UGGUAG           | GUCCUC            | ge     | 1 |
| trf_6_2 | Bra016 | 10  |    |   |    |      |      | GGGGAUGUAGCUCAGA | UUAUCAUCUGAGCUUC  | Cleava |   |
| 93      | 141    | 3   | .4 | 1 | 22 | 3031 | 3052 | UGGUAG           | GUUCUC            | ge     | 1 |
| trf_6_2 | Bra036 | 20  |    |   |    |      |      | GGGGAUGUAGCUCAGA | UCGACUGGCUGAGCUA  | Cleava |   |
| 93      | 771    | 3   | .2 | 1 | 23 | 5375 | 5397 | UGGUAGA          | CAUUCCU           | ge     | 1 |
| trf_6_2 | Bra018 | 8.  |    |   |    |      |      | GGGGAUGUAGCUCAGA | GCCACCUCAGCUACAUC | Cleava |   |
| 93      | 620    | 3   | 3  | 1 | 20 | 7    | 26   | UGGU             | CUC               | ge     | 1 |
| trf_6_2 | Bra016 | 9.  |    |   |    |      |      | GUCGUUGUAGUUAUAG | UACUAUUUAUACUACAA | Cleava |   |
| 94      | 584    | 3   | 9  | 1 | 20 | 1045 | 1064 | UGGUA            | AGGC              | ge     | 1 |
| trf_6_2 | Bra035 | 10  |    |   |    |      |      | GUCGUUGUAGUUAUAG | UACCACAAUACUUCAA  | Cleava |   |
| 94      | 409    | 3   | .4 | 1 | 20 | 1328 | 1347 | UGGUA            | CGAG              | ge     | 1 |
| trf_6_2 | Bra016 | 9.  |    |   |    |      |      | GUCGUUGUAGUUAUAG | UACUAUUUAUACUACAA | Cleava |   |
| 95      | 584    | 3   | 9  | 1 | 20 | 1045 | 1064 | UGGUA            | AGGC              | ge     | 1 |
| trf_6_2 | Bra035 | 10  |    |   |    |      |      | GUCGUUGUAGUUAUAG | UACCACAAUACUUCAA  | Cleava |   |
| 95      | 409    | 3   | .4 | 1 | 20 | 1328 | 1347 | UGGUA            | CGAG              | ge     | 1 |
| trf_6_2 | Bra016 | 9.  |    |   |    |      |      | GUCGUUGUAGUUAUAG | UACUAUUUAUACUACAA | Cleava |   |
| 96      | 584    | 3   | 9  | 1 | 20 | 1045 | 1064 | UGGUA            | AGGC              | ge     | 1 |
| trf_6_2 | Bra035 | 10  |    |   |    |      |      | GUCGUUGUAGUUAUAG | UACCACAAUACUUCAA  | Cleava |   |
| 96      | 409    | 3   | .4 | 1 | 20 | 1328 | 1347 | UGGUA            | CGAG              | ge     | 1 |
| trf_6_2 | Bra007 | 14  |    |   |    |      |      | GCACCAGUGGUCUAGU | UACUACUGGACCUUUG  | Cleava |   |
| 99      | 154    | 2.5 | .1 | 1 | 20 | 511  | 530  | GGUA             | GUGC              | ge     | 1 |
| trf_6_3 | Bra016 | 9.  |    |   |    |      |      | GUCGUUGUAGUUAUAG | UACUAUUUAUACUACAA | Cleava |   |
| 01      | 584    | 3   | 9  | 1 | 20 | 1045 | 1064 | UGGUA            | AGGC              | ge     | 1 |



|         |        |     |    |   |    |      |      |                  |                  |        |   |
|---------|--------|-----|----|---|----|------|------|------------------|------------------|--------|---|
| trf_6_3 | Bra035 | 10  |    |   |    |      |      | GUCGUUGUAGUAUAG  | UACCACAAUACUUCAA | Cleava |   |
| 01      | 409    | 3   | .4 | 1 | 20 | 1328 | 1347 | UGGUA            | CGAG             | ge     | 1 |
| trf_6_3 | Bra016 | 9.  |    |   |    |      |      | GUCGUUGUAGUAUAG  | UACUAUUUACUACAA  | Cleava |   |
| 02      | 584    | 3   | 9  | 1 | 20 | 1045 | 1064 | UGGUA            | AGGC             | ge     | 1 |
| trf_6_3 | Bra035 | 10  |    |   |    |      |      | GUCGUUGUAGUAUAG  | UACCACAAUACUUCAA | Cleava |   |
| 02      | 409    | 3   | .4 | 1 | 20 | 1328 | 1347 | UGGUA            | CGAG             | ge     | 1 |
| trf_6_3 | Bra016 | 9.  |    |   |    |      |      | GUCGUUGUAGUAUAG  | UACUAUUUACUACAA  | Cleava |   |
| 03      | 584    | 3   | 9  | 1 | 20 | 1045 | 1064 | UGGUA            | AGGC             | ge     | 1 |
| trf_6_3 | Bra035 | 10  |    |   |    |      |      | GUCGUUGUAGUAUAG  | UACCACAAUACUUCAA | Cleava |   |
| 03      | 409    | 3   | .4 | 1 | 20 | 1328 | 1347 | UGGUA            | CGAG             | ge     | 1 |
| trf_6_3 | Bra016 | 9.  |    |   |    |      |      | GUCGUUGUAGUAUAG  | UACUAUUUACUACAA  | Cleava |   |
| 04      | 584    | 3   | 9  | 1 | 20 | 1045 | 1064 | UGGUA            | AGGC             | ge     | 1 |
| trf_6_3 | Bra035 | 10  |    |   |    |      |      | GUCGUUGUAGUAUAG  | UACCACAAUACUUCAA | Cleava |   |
| 04      | 409    | 3   | .4 | 1 | 20 | 1328 | 1347 | UGGUA            | CGAG             | ge     | 1 |
| trf_6_3 | Bra013 | 22  |    |   |    |      |      | UCCGUUGUAGUCUAGC | CAUCAUCAGCUUGGCU | Cleava |   |
| 05      | 528    | 3   | .0 | 1 | 24 | 196  | 219  | UGGUCAGG         | AUAACGGG         | ge     | 1 |
| trf_6_3 | Bra016 | 9.  |    |   |    |      |      | GUCGUUGUAGUAUAG  | UACUAUUUACUACAA  | Cleava |   |
| 06      | 584    | 3   | 9  | 1 | 20 | 1045 | 1064 | UGGUA            | AGGC             | ge     | 1 |
| trf_6_3 | Bra035 | 10  |    |   |    |      |      | GUCGUUGUAGUAUAG  | UACCACAAUACUUCAA | Cleava |   |
| 06      | 409    | 3   | .4 | 1 | 20 | 1328 | 1347 | UGGUA            | CGAG             | ge     | 1 |
| trf_6_3 | Bra016 | 9.  |    |   |    |      |      | GUCGUUGUAGUAUAG  | UACUAUUUACUACAA  | Cleava |   |
| 07      | 584    | 3   | 9  | 1 | 20 | 1045 | 1064 | UGGUA            | AGGC             | ge     | 1 |
| trf_6_3 | Bra035 | 10  |    |   |    |      |      | GUCGUUGUAGUAUAG  | UACCACAAUACUUCAA | Cleava |   |
| 07      | 409    | 3   | .4 | 1 | 20 | 1328 | 1347 | UGGUA            | CGAG             | ge     | 1 |
| trf_6_3 | Bra016 | 9.  |    |   |    |      |      | GUCGUUGUAGUAUAG  | UACUAUUUACUACAA  | Cleava |   |
| 08      | 584    | 3   | 9  | 1 | 20 | 1045 | 1064 | UGGUA            | AGGC             | ge     | 1 |
| trf_6_3 | Bra035 | 10  |    |   |    |      |      | GUCGUUGUAGUAUAG  | UACCACAAUACUUCAA | Cleava |   |
| 08      | 409    | 3   | .4 | 1 | 20 | 1328 | 1347 | UGGUA            | CGAG             | ge     | 1 |
| trf_6_3 | Bra016 | 9.  |    |   |    |      |      | GUCGUUGUAGUAUAG  | UACUAUUUACUACAA  | Cleava |   |
| 09      | 584    | 3   | 9  | 1 | 20 | 1045 | 1064 | UGGUA            | AGGC             | ge     | 1 |
| trf_6_3 | Bra035 | 10  |    |   |    |      |      | GUCGUUGUAGUAUAG  | UACCACAAUACUUCAA | Cleava |   |
| 09      | 409    | 3   | .4 | 1 | 20 | 1328 | 1347 | UGGUA            | CGAG             | ge     | 1 |
| trf_6_3 | Bra007 | 14  |    |   |    |      |      | GCACCAGUGGUCUAGU | UACUACUGGACCUUUG | Cleava |   |
| 11      | 154    | 2.5 | .1 | 1 | 20 | 511  | 530  | GGUA             | GUGC             | ge     | 1 |

|         |        |    |    |   |    |      |      |                  |                   |        |   |
|---------|--------|----|----|---|----|------|------|------------------|-------------------|--------|---|
| trf_6_3 | Bra009 | 14 |    |   |    |      |      | GGGGAUGUAGCUCAGA | UUAUCAUCUGGGCUUC  | Cleava |   |
| 12      | 876    | 3  | .9 | 1 | 22 | 16   | 37   | UGGUAG           | GUCCUC            | ge     | 1 |
| trf_6_3 | Bra016 | 10 |    |   |    |      |      | GGGGAUGUAGCUCAGA | UUAUCAUCUGAGCUUC  | Cleava |   |
| 12      | 141    | 3  | .4 | 1 | 22 | 3031 | 3052 | UGGUAG           | GUUCUC            | ge     | 1 |
| trf_6_3 | Bra036 | 20 |    |   |    |      |      | GGGGAUGUAGCUCAGA | UCGACUGGCUGAGCUA  | Cleava |   |
| 12      | 771    | 3  | .2 | 1 | 23 | 5375 | 5397 | UGGUAGA          | CAUUCCU           | ge     | 1 |
| trf_6_3 | Bra018 | 8. |    |   |    |      |      | GGGGAUGUAGCUCAGA | GCCACCUCAGCUACAUC | Cleava |   |
| 12      | 620    | 3  | 3  | 1 | 20 | 7    | 26   | UGGU             | CUC               | ge     | 1 |
| trf_6_3 | Bra013 | 16 |    |   |    |      |      | UCCGUUGUCGUCCAGC | UAACCGAUGGAUGUCA  | Cleava |   |
| 13      | 584    | 3  | .4 | 1 | 21 | 890  | 910  | GGUUA            | AUGGA             | ge     | 1 |
| trf_6_3 | Bra000 | 11 |    |   |    |      |      | UCCGUUGUCGUCCAGC | UAACCGGAGGACGAUA  | Cleava |   |
| 13      | 529    | 3  | .2 | 1 | 21 | 984  | 1004 | GGUUA            | AUGGA             | ge     | 1 |
| trf_6_3 | Bra013 | 16 |    |   |    |      |      | UCCGUUGUCGUCCAGC | AUGAUAACCGAUGGAU  | Cleava |   |
| 14      | 584    | 3  | .4 | 1 | 25 | 886  | 910  | GGUUAGGAU        | GUCAAUGGA         | ge     | 1 |
| trf_6_3 | Bra000 | 11 |    |   |    |      |      | UCCGUUGUCGUCCAGC | UAACCGGAGGACGAUA  | Cleava |   |
| 14      | 529    | 3  | .2 | 1 | 21 | 984  | 1004 | GGUUA            | AUGGA             | ge     | 1 |
| trf_6_3 | Bra013 | 16 |    |   |    |      |      | UCCGUUGUCGUCCAGC | UAACCGAUGGAUGUCA  | Cleava |   |
| 15      | 584    | 3  | .4 | 1 | 21 | 890  | 910  | GGUUA            | AUGGA             | ge     | 1 |
| trf_6_3 | Bra000 | 11 |    |   |    |      |      | UCCGUUGUCGUCCAGC | UAACCGGAGGACGAUA  | Cleava |   |
| 15      | 529    | 3  | .2 | 1 | 21 | 984  | 1004 | GGUUA            | AUGGA             | ge     | 1 |
| trf_6_3 | Bra013 | 16 |    |   |    |      |      | UCCGUUGUCGUCCAGC | UAUGAUAACCGAUGGA  | Cleava |   |
| 16      | 584    | 3  | .4 | 1 | 26 | 885  | 910  | GGUUAGGAUA       | UGUCAAUGGA        | ge     | 1 |
| trf_6_3 | Bra000 | 11 |    |   |    |      |      | UCCGUUGUCGUCCAGC | UAACCGGAGGACGAUA  | Cleava |   |
| 16      | 529    | 3  | .2 | 1 | 21 | 984  | 1004 | GGUUA            | AUGGA             | ge     | 1 |
| trf_6_3 | Bra013 | 16 |    |   |    |      |      | UCCGUUGUCGUCCAGC | UAACCGAUGGAUGUCA  | Cleava |   |
| 17      | 584    | 3  | .4 | 1 | 21 | 890  | 910  | GGUUA            | AUGGA             | ge     | 1 |
| trf_6_3 | Bra000 | 11 |    |   |    |      |      | UCCGUUGUCGUCCAGC | UAACCGGAGGACGAUA  | Cleava |   |
| 17      | 529    | 3  | .2 | 1 | 21 | 984  | 1004 | GGUUA            | AUGGA             | ge     | 1 |
| trf_6_3 | Bra013 | 16 |    |   |    |      |      | UCCGUUGUCGUCCAGC | UAUGAUAACCGAUGGA  | Cleava |   |
| 18      | 584    | 3  | .4 | 1 | 26 | 885  | 910  | GGUUAGGAUA       | UGUCAAUGGA        | ge     | 1 |
| trf_6_3 | Bra000 | 11 |    |   |    |      |      | UCCGUUGUCGUCCAGC | UAACCGGAGGACGAUA  | Cleava |   |
| 18      | 529    | 3  | .2 | 1 | 21 | 984  | 1004 | GGUUA            | AUGGA             | ge     | 1 |
| trf_6_3 | Bra013 | 16 |    |   |    |      |      | UCCGUUGUCGUCCAGC | AACCGAUGGAUGUCA   | Cleava |   |
| 20      | 584    | 3  | .4 | 1 | 20 | 891  | 910  | GGUU             | UGGA              | ge     | 1 |

|         |        |    |    |   |    |      |      |                  |                   |        |   |
|---------|--------|----|----|---|----|------|------|------------------|-------------------|--------|---|
| trf_6_3 | Bra000 | 11 |    |   |    |      |      | UCCGUUGUCGUCCAGC | AACCGGAGGACGAUAA  | Cleava |   |
| 20      | 529    | 3  | .2 | 1 | 20 | 985  | 1004 | GGUU             | UGGA              | ge     | 1 |
| trf_6_3 | Bra014 | 17 |    |   |    |      |      | GGGGAUGUAGCUCAUA | UGUAUUUAUUAGCU    | Cleava |   |
| 21      | 507    | 3  | .0 | 1 | 23 | 541  | 563  | UGGUAGA          | AUAUCUCC          | ge     | 1 |
| trf_6_3 | Bra016 | 20 |    |   |    |      |      | UCCGUCGUAGUCUAGC | CUGAAGAAGCUAGGCU  | Cleava |   |
| 22      | 601    | 3  | .8 | 1 | 24 | 415  | 438  | UGGUUAGG         | GCGACGGA          | ge     | 1 |
| trf_6_3 | Bra016 | 20 |    |   |    |      |      | UCCGUCGUAGUCUAGC | CUGAAGAAGCUAGGCU  | Cleava |   |
| 23      | 601    | 3  | .8 | 1 | 24 | 415  | 438  | UGGUUAGG         | GCGACGGA          | ge     | 1 |
| trf_6_3 | Bra016 | 20 |    |   |    |      |      | UCCGUCGUAGUCUAGC | AAGAAGCUAGGCUGCG  | Cleava |   |
| 24      | 601    | 3  | .8 | 1 | 21 | 418  | 438  | UGGUU            | ACGGA             | ge     | 1 |
| trf_6_3 | Bra016 | 20 |    |   |    |      |      | UCCGUCGUAGUCUAGC | CUGAAGAAGCUAGGCU  | Cleava |   |
| 25      | 601    | 3  | .8 | 1 | 24 | 415  | 438  | UGGUUAGG         | GCGACGGA          | ge     | 1 |
| trf_6_3 | Bra009 | 14 |    |   |    |      |      | GGGGAUGUAGCUCAGA | UUAUCAUCUGGGCUUC  | Cleava |   |
| 28      | 876    | 3  | .9 | 1 | 22 | 16   | 37   | UGGUAG           | GUCCUC            | ge     | 1 |
| trf_6_3 | Bra016 | 10 |    |   |    |      |      | GGGGAUGUAGCUCAGA | UUAUCAUCUGAGCUUC  | Cleava |   |
| 28      | 141    | 3  | .4 | 1 | 22 | 3031 | 3052 | UGGUAG           | GUUCUC            | ge     | 1 |
| trf_6_3 | Bra036 | 20 |    |   |    |      |      | GGGGAUGUAGCUCAGA | UCGACUGGCUGAGCUA  | Cleava |   |
| 28      | 771    | 3  | .2 | 1 | 23 | 5375 | 5397 | UGGUAGA          | CAUUCCU           | ge     | 1 |
| trf_6_3 | Bra018 | 8. |    |   |    |      |      | GGGGAUGUAGCUCAGA | GCCACCUCAGCUACAUC | Cleava |   |
| 28      | 620    | 3  | 3  | 1 | 20 | 7    | 26   | UGGU             | CUC               | ge     | 1 |
| trf_6_3 | Bra036 | 20 |    |   |    |      |      | GGGGAUGUAGCUCAGA | CUCGACUGGCUGAGCU  | Cleava |   |
| 29      | 771    | 3  | .2 | 1 | 24 | 5374 | 5397 | UGGUAGAG         | ACAUUCCU          | ge     | 1 |
| trf_6_3 | Bra009 | 14 |    |   |    |      |      | GGGGAUGUAGCUCAGA | CGUUAUCAUCUGGGCU  | Cleava |   |
| 29      | 876    | 3  | .9 | 1 | 24 | 14   | 37   | UGGUAGAG         | UCGUCCUC          | ge     | 1 |
| trf_6_3 | Bra016 | 10 |    |   |    |      |      | GGGGAUGUAGCUCAGA | CAUUAUCAUCUGAGCU  | Cleava |   |
| 29      | 141    | 3  | .4 | 1 | 24 | 3029 | 3052 | UGGUAGAG         | UCGUUCUC          | ge     | 1 |
| trf_6_3 | Bra018 | 8. |    |   |    |      |      | GGGGAUGUAGCUCAGA | GCCACCUCAGCUACAUC | Cleava |   |
| 29      | 620    | 3  | 3  | 1 | 20 | 7    | 26   | UGGU             | CUC               | ge     | 1 |
| trf_6_3 | Bra016 | 9. |    |   |    |      |      | GUCGUUGUAGUAUAG  | UACUAUUUAUACUACAA | Cleava |   |
| 31      | 584    | 3  | 9  | 1 | 20 | 1045 | 1064 | UGGUA            | AGGC              | ge     | 1 |
| trf_6_3 | Bra035 | 10 |    |   |    |      |      | GUCGUUGUAGUAUAG  | UACCACAAUACUUCAA  | Cleava |   |
| 31      | 409    | 3  | .4 | 1 | 20 | 1328 | 1347 | UGGUA            | CGAG              | ge     | 1 |
| trf_6_3 | Bra016 | 9. |    |   |    |      |      | GUCGUUGUAGUAUAG  | UACUAUUUAUACUACAA | Cleava |   |
| 32      | 584    | 3  | 9  | 1 | 20 | 1045 | 1064 | UGGUA            | AGGC              | ge     | 1 |

|         |        |    |    |   |    |      |      |                  |                   |        |   |
|---------|--------|----|----|---|----|------|------|------------------|-------------------|--------|---|
| trf_6_3 | Bra035 | 10 |    |   |    |      |      | GUCGUUGUAGUAG    | UACCACAAUACUCAA   | Cleava |   |
| 32      | 409    | 3  | .4 | 1 | 20 | 1328 | 1347 | UGGUA            | CGAG              | ge     | 1 |
| trf_6_3 | Bra016 | 9. |    |   |    |      |      | GUCGUUGUAGUAG    | UACUAAUUAUACUACAA | Cleava |   |
| 33      | 584    | 3  | 9  | 1 | 20 | 1045 | 1064 | UGGUA            | AGGC              | ge     | 1 |
| trf_6_3 | Bra035 | 10 |    |   |    |      |      | GUCGUUGUAGUAG    | UACCACAAUACUCAA   | Cleava |   |
| 33      | 409    | 3  | .4 | 1 | 20 | 1328 | 1347 | UGGUA            | CGAG              | ge     | 1 |
| trf_6_3 | Bra009 | 14 |    |   |    |      |      | GGGGAUGUAGCUCAGA | UUAUCAUCUGGGCUUC  | Cleava |   |
| 36      | 876    | 3  | .9 | 1 | 22 | 16   | 37   | UGGUAG           | GUCCUC            | ge     | 1 |
| trf_6_3 | Bra016 | 10 |    |   |    |      |      | GGGGAUGUAGCUCAGA | UUAUCAUCUGAGCUUC  | Cleava |   |
| 36      | 141    | 3  | .4 | 1 | 22 | 3031 | 3052 | UGGUAG           | GUUCUC            | ge     | 1 |
| trf_6_3 | Bra036 | 20 |    |   |    |      |      | GGGGAUGUAGCUCAGA | UCGACUGGCUGAGCUA  | Cleava |   |
| 36      | 771    | 3  | .2 | 1 | 23 | 5375 | 5397 | UGGUAGA          | CAUUCU            | ge     | 1 |
| trf_6_3 | Bra018 | 8. |    |   |    |      |      | GGGGAUGUAGCUCAGA | GCCACCUCAGCUACAUC | Cleava |   |
| 36      | 620    | 3  | 3  | 1 | 20 | 7    | 26   | UGGU             | CUC               | ge     | 1 |
| trf_6_3 | Bra016 | 9. |    |   |    |      |      | GUCGUUGUAGUAG    | UACUAAUUAUACUACAA | Cleava |   |
| 40      | 584    | 3  | 9  | 1 | 20 | 1045 | 1064 | UGGUA            | AGGC              | ge     | 1 |
| trf_6_3 | Bra035 | 10 |    |   |    |      |      | GUCGUUGUAGUAG    | UACCACAAUACUCAA   | Cleava |   |
| 40      | 409    | 3  | .4 | 1 | 20 | 1328 | 1347 | UGGUA            | CGAG              | ge     | 1 |
| trf_6_3 | Bra016 | 9. |    |   |    |      |      | GUCGUUGUAGUAG    | UACUAAUUAUACUACAA | Cleava |   |
| 41      | 584    | 3  | 9  | 1 | 20 | 1045 | 1064 | UGGUA            | AGGC              | ge     | 1 |
| trf_6_3 | Bra035 | 10 |    |   |    |      |      | GUCGUUGUAGUAG    | UACCACAAUACUCAA   | Cleava |   |
| 41      | 409    | 3  | .4 | 1 | 20 | 1328 | 1347 | UGGUA            | CGAG              | ge     | 1 |
| trf_6_3 | Bra016 | 9. |    |   |    |      |      | GUCGUUGUAGUAG    | UACUAAUUAUACUACAA | Cleava |   |
| 42      | 584    | 3  | 9  | 1 | 20 | 1045 | 1064 | UGGUA            | AGGC              | ge     | 1 |
| trf_6_3 | Bra035 | 10 |    |   |    |      |      | GUCGUUGUAGUAG    | UACCACAAUACUCAA   | Cleava |   |
| 42      | 409    | 3  | .4 | 1 | 20 | 1328 | 1347 | UGGUA            | CGAG              | ge     | 1 |
| trf_6_3 | Bra016 | 9. |    |   |    |      |      | GUCGUUGUAGUAG    | UACUAAUUAUACUACAA | Cleava |   |
| 43      | 584    | 3  | 9  | 1 | 20 | 1045 | 1064 | UGGUA            | AGGC              | ge     | 1 |
| trf_6_3 | Bra035 | 10 |    |   |    |      |      | GUCGUUGUAGUAG    | UACCACAAUACUCAA   | Cleava |   |
| 43      | 409    | 3  | .4 | 1 | 20 | 1328 | 1347 | UGGUA            | CGAG              | ge     | 1 |
| trf_6_3 | Bra009 | 14 |    |   |    |      |      | GGGGAUGUAGCUCAGA | UUAUCAUCUGGGCUUC  | Cleava |   |
| 44      | 876    | 3  | .9 | 1 | 22 | 16   | 37   | UGGUAG           | GUCCUC            | ge     | 1 |
| trf_6_3 | Bra016 | 10 |    |   |    |      |      | GGGGAUGUAGCUCAGA | UUAUCAUCUGAGCUUC  | Cleava |   |
| 44      | 141    | 3  | .4 | 1 | 22 | 3031 | 3052 | UGGUAG           | GUUCUC            | ge     | 1 |

|         |        |     |    |   |    |      |      |                  |                   |        |   |
|---------|--------|-----|----|---|----|------|------|------------------|-------------------|--------|---|
| trf_6_3 | Bra036 | 20  |    |   |    |      |      | GGGGAUGUAGCUCAGA | UCGACUGGCUGAGCUA  | Cleava |   |
| 44      | 771    | 3   | .2 | 1 | 23 | 5375 | 5397 | UGGUAGA          | CAUUCCU           | ge     | 1 |
| trf_6_3 | Bra018 | 8.  |    |   |    |      |      | GGGGAUGUAGCUCAGA | GCCACCUCAGCUACAUC | Cleava |   |
| 44      | 620    | 3   | 3  | 1 | 20 | 7    | 26   | UGGU             | CUC               | ge     | 1 |
| trf_6_3 | Bra009 | 14  |    |   |    |      |      | GGGGAUGUAGCUCAGA | UUAUCAUCUGGGCUUC  | Cleava |   |
| 45      | 876    | 3   | .9 | 1 | 22 | 16   | 37   | UGGUAG           | GUCCUC            | ge     | 1 |
| trf_6_3 | Bra016 | 10  |    |   |    |      |      | GGGGAUGUAGCUCAGA | UUAUCAUCUGAGCUUC  | Cleava |   |
| 45      | 141    | 3   | .4 | 1 | 22 | 3031 | 3052 | UGGUAG           | GUUCUC            | ge     | 1 |
| trf_6_3 | Bra036 | 20  |    |   |    |      |      | GGGGAUGUAGCUCAGA | UCGACUGGCUGAGCUA  | Cleava |   |
| 45      | 771    | 3   | .2 | 1 | 23 | 5375 | 5397 | UGGUAGA          | CAUUCCU           | ge     | 1 |
| trf_6_3 | Bra018 | 8.  |    |   |    |      |      | GGGGAUGUAGCUCAGA | GCCACCUCAGCUACAUC | Cleava |   |
| 45      | 620    | 3   | 3  | 1 | 20 | 7    | 26   | UGGU             | CUC               | ge     | 1 |
| trf_6_3 | Bra026 | 23  |    |   |    |      |      | AUCAGAGUCGCGCAGC | CUUCCUCUUCGCGCCU  | Cleava |   |
| 50      | 662    | 3   | .3 | 1 | 21 | 201  | 221  | GGAAG            | CUGAU             | ge     | 1 |
| trf_6_3 | Bra009 | 14  |    |   |    |      |      | GGGGAUGUAGCUCAGA | UUAUCAUCUGGGCUUC  | Cleava |   |
| 51      | 876    | 3   | .9 | 1 | 22 | 16   | 37   | UGGUAG           | GUCCUC            | ge     | 1 |
| trf_6_3 | Bra016 | 10  |    |   |    |      |      | GGGGAUGUAGCUCAGA | UUAUCAUCUGAGCUUC  | Cleava |   |
| 51      | 141    | 3   | .4 | 1 | 22 | 3031 | 3052 | UGGUAG           | GUUCUC            | ge     | 1 |
| trf_6_3 | Bra036 | 20  |    |   |    |      |      | GGGGAUGUAGCUCAGA | UCGACUGGCUGAGCUA  | Cleava |   |
| 51      | 771    | 3   | .2 | 1 | 23 | 5375 | 5397 | UGGUAGA          | CAUUCCU           | ge     | 1 |
| trf_6_3 | Bra018 | 8.  |    |   |    |      |      | GGGGAUGUAGCUCAGA | GCCACCUCAGCUACAUC | Cleava |   |
| 51      | 620    | 3   | 3  | 1 | 20 | 7    | 26   | UGGU             | CUC               | ge     | 1 |
| trf_6_3 | Bra007 | 14  |    |   |    |      |      | GCACCAGUGGUCUAGU | UACUACUGGACCUUUG  | Cleava |   |
| 54      | 154    | 2.5 | .1 | 1 | 20 | 511  | 530  | GGUA             | GUGC              | ge     | 1 |
| trf_6_3 | Bra007 | 14  |    |   |    |      |      | GCACCAGUGGUCUAGU | UACUACUGGACCUUUG  | Cleava |   |
| 57      | 154    | 2.5 | .1 | 1 | 20 | 511  | 530  | GGUA             | GUGC              | ge     | 1 |
| trf_6_3 | Bra016 | 9.  |    |   |    |      |      | GUCGUUGUAGUUAUAG | UACUAUUUAUACUACAA | Cleava |   |
| 58      | 584    | 3   | 9  | 1 | 20 | 1045 | 1064 | UGGUA            | AGGC              | ge     | 1 |
| trf_6_3 | Bra035 | 10  |    |   |    |      |      | GUCGUUGUAGUUAUAG | UACCACAAUACUUCAA  | Cleava |   |
| 58      | 409    | 3   | .4 | 1 | 20 | 1328 | 1347 | UGGUA            | CGAG              | ge     | 1 |
| trf_6_3 | Bra016 | 9.  |    |   |    |      |      | GUCGUUGUAGUUAUAG | UACUAUUUAUACUACAA | Cleava |   |
| 59      | 584    | 3   | 9  | 1 | 20 | 1045 | 1064 | UGGUA            | AGGC              | ge     | 1 |
| trf_6_3 | Bra035 | 10  |    |   |    |      |      | GUCGUUGUAGUUAUAG | UACCACAAUACUUCAA  | Cleava |   |
| 59      | 409    | 3   | .4 | 1 | 20 | 1328 | 1347 | UGGUA            | CGAG              | ge     | 1 |

|         |        |    |    |   |    |      |      |                  |                   |        |   |
|---------|--------|----|----|---|----|------|------|------------------|-------------------|--------|---|
| trf_6_3 | Bra016 | 9. |    |   |    |      |      | GUCGUUGUAGUUAUAG | UACUAUUUAUACUACAA | Cleava |   |
| 60      | 584    | 3  | 9  | 1 | 20 | 1045 | 1064 | UGGUA            | AGGC              | ge     | 1 |
| trf_6_3 | Bra035 | 10 |    |   |    |      |      | GUCGUUGUAGUUAUAG | UACCACAAUACUUCAA  | Cleava |   |
| 60      | 409    | 3  | .4 | 1 | 20 | 1328 | 1347 | UGGUA            | CGAG              | ge     | 1 |
| trf_6_3 | Bra016 | 9. |    |   |    |      |      | GUCGUUGUAGUUAUAG | UACUAUUUAUACUACAA | Cleava |   |
| 61      | 584    | 3  | 9  | 1 | 20 | 1045 | 1064 | UGGUA            | AGGC              | ge     | 1 |
| trf_6_3 | Bra035 | 10 |    |   |    |      |      | GUCGUUGUAGUUAUAG | UACCACAAUACUUCAA  | Cleava |   |
| 61      | 409    | 3  | .4 | 1 | 20 | 1328 | 1347 | UGGUA            | CGAG              | ge     | 1 |
| trf_6_3 | Bra016 | 9. |    |   |    |      |      | GUCGUUGUAGUUAUAG | UACUAUUUAUACUACAA | Cleava |   |
| 62      | 584    | 3  | 9  | 1 | 20 | 1045 | 1064 | UGGUA            | AGGC              | ge     | 1 |
| trf_6_3 | Bra035 | 10 |    |   |    |      |      | GUCGUUGUAGUUAUAG | UACCACAAUACUUCAA  | Cleava |   |
| 62      | 409    | 3  | .4 | 1 | 20 | 1328 | 1347 | UGGUA            | CGAG              | ge     | 1 |
| trf_6_3 | Bra009 | 14 |    |   |    |      |      | GGGGAUGUAGCUCAGA | UUAUCAUCUGGGCUUC  | Cleava |   |
| 63      | 876    | 3  | .9 | 1 | 22 | 16   | 37   | UGGUAG           | GUCCUC            | ge     | 1 |
| trf_6_3 | Bra016 | 10 |    |   |    |      |      | GGGGAUGUAGCUCAGA | UUAUCAUCUGAGCUUC  | Cleava |   |
| 63      | 141    | 3  | .4 | 1 | 22 | 3031 | 3052 | UGGUAG           | GUUCUC            | ge     | 1 |
| trf_6_3 | Bra036 | 20 |    |   |    |      |      | GGGGAUGUAGCUCAGA | UCGACUGGCUGAGCUA  | Cleava |   |
| 63      | 771    | 3  | .2 | 1 | 23 | 5375 | 5397 | UGGUAGA          | CAUUCCU           | ge     | 1 |
| trf_6_3 | Bra018 | 8. |    |   |    |      |      | GGGGAUGUAGCUCAGA | GCCACCUCAGCUACAUC | Cleava |   |
| 63      | 620    | 3  | 3  | 1 | 20 | 7    | 26   | UGGU             | CUC               | ge     | 1 |
| trf_6_3 | Bra024 | 7. |    |   |    |      |      | GGGGAUGUAGCUCAAA | UCCAACAUUUCGGUUA  | Cleava |   |
| 64      | 638    | 3  | 5  | 1 | 23 | 203  | 225  | UGGUAGA          | CAUCCCC           | ge     | 1 |
| trf_6_3 | Bra025 | 17 |    |   |    |      |      | GGGGAUGUAGCUCAAA | ACAAUUUGAGCUUCAU  | Cleava |   |
| 64      | 904    | 3  | .2 | 1 | 20 | 344  | 363  | UGGU             | CUUC              | ge     | 1 |
| trf_6_3 | Bra009 | 14 |    |   |    |      |      | GGGGAUGUAGCUCAGA | UUAUCAUCUGGGCUUC  | Cleava |   |
| 66      | 876    | 3  | .9 | 1 | 22 | 16   | 37   | UGGUAG           | GUCCUC            | ge     | 1 |
| trf_6_3 | Bra016 | 10 |    |   |    |      |      | GGGGAUGUAGCUCAGA | UUAUCAUCUGAGCUUC  | Cleava |   |
| 66      | 141    | 3  | .4 | 1 | 22 | 3031 | 3052 | UGGUAG           | GUUCUC            | ge     | 1 |
| trf_6_3 | Bra036 | 20 |    |   |    |      |      | GGGGAUGUAGCUCAGA | UCGACUGGCUGAGCUA  | Cleava |   |
| 66      | 771    | 3  | .2 | 1 | 23 | 5375 | 5397 | UGGUAGA          | CAUUCCU           | ge     | 1 |
| trf_6_3 | Bra018 | 8. |    |   |    |      |      | GGGGAUGUAGCUCAGA | GCCACCUCAGCUACAUC | Cleava |   |
| 66      | 620    | 3  | 3  | 1 | 20 | 7    | 26   | UGGU             | CUC               | ge     | 1 |
| trf_6_3 | Bra009 | 14 |    |   |    |      |      | GGGGAUGUAGCUCAGA | UUAUCAUCUGGGCUUC  | Cleava |   |
| 79      | 876    | 3  | .9 | 1 | 22 | 16   | 37   | UGGUAG           | GUCCUC            | ge     | 1 |

|         |        |     |    |   |    |      |      |                  |                   |        |   |
|---------|--------|-----|----|---|----|------|------|------------------|-------------------|--------|---|
| trf_6_3 | Bra016 | 10  |    |   |    |      |      | GGGGAUGUAGCUCAGA | UUAUCAUCUGAGCUUC  | Cleava |   |
| 79      | 141    | 3   | .4 | 1 | 22 | 3031 | 3052 | UGGUAG           | GUUCUC            | ge     | 1 |
| trf_6_3 | Bra036 | 20  |    |   |    |      |      | GGGGAUGUAGCUCAGA | UCGACUGGCUGAGCUA  | Cleava |   |
| 79      | 771    | 3   | .2 | 1 | 23 | 5375 | 5397 | UGGUAGA          | CAUUCCU           | ge     | 1 |
| trf_6_3 | Bra018 | 8.  |    |   |    |      |      | GGGGAUGUAGCUCAGA | GCCACCUCAGCUACAUC | Cleava |   |
| 79      | 620    | 3   | 3  | 1 | 20 | 7    | 26   | UGGU             | CUC               | ge     | 1 |
| trf_6_3 | Bra007 | 14  |    |   |    |      |      | GCACCAGUGGUCUAGU | UACUACUGGACCUUUG  | Cleava |   |
| 83      | 154    | 2.5 | .1 | 1 | 20 | 511  | 530  | GGUA             | GUGC              | ge     | 1 |
| trf_6_3 | Bra009 | 14  |    |   |    |      |      | GGGGAUGUAGCUCAGA | UUAUCAUCUGGGCUUC  | Cleava |   |
| 86      | 876    | 3   | .9 | 1 | 22 | 16   | 37   | UGGUAG           | GUCCUC            | ge     | 1 |
| trf_6_3 | Bra016 | 10  |    |   |    |      |      | GGGGAUGUAGCUCAGA | UUAUCAUCUGAGCUUC  | Cleava |   |
| 86      | 141    | 3   | .4 | 1 | 22 | 3031 | 3052 | UGGUAG           | GUUCUC            | ge     | 1 |
| trf_6_3 | Bra036 | 20  |    |   |    |      |      | GGGGAUGUAGCUCAGA | UCGACUGGCUGAGCUA  | Cleava |   |
| 86      | 771    | 3   | .2 | 1 | 23 | 5375 | 5397 | UGGUAGA          | CAUUCCU           | ge     | 1 |
| trf_6_3 | Bra018 | 8.  |    |   |    |      |      | GGGGAUGUAGCUCAGA | GCCACCUCAGCUACAUC | Cleava |   |
| 86      | 620    | 3   | 3  | 1 | 20 | 7    | 26   | UGGU             | CUC               | ge     | 1 |
| trf_6_3 | Bra024 | 7.  |    |   |    |      |      | GGGGAUGUAGCUAAA  | UCCAACAUUUCGGUUA  | Cleava |   |
| 87      | 638    | 3   | 5  | 1 | 23 | 203  | 225  | UGGUAGA          | CAUCCCC           | ge     | 1 |
| trf_6_3 | Bra025 | 17  |    |   |    |      |      | GGGGAUGUAGCUAAA  | ACAAUUUGAGCUUCAU  | Cleava |   |
| 87      | 904    | 3   | .2 | 1 | 20 | 344  | 363  | UGGU             | CUUC              | ge     | 1 |
| trf_6_3 | Bra016 | 9.  |    |   |    |      |      | GUCGUUGUAGUUAUAG | UACUAUUUAUACUACAA | Cleava |   |
| 89      | 584    | 3   | 9  | 1 | 20 | 1045 | 1064 | UGGUA            | AGGC              | ge     | 1 |
| trf_6_3 | Bra035 | 10  |    |   |    |      |      | GUCGUUGUAGUUAUAG | UACCACAAUACUUCAA  | Cleava |   |
| 89      | 409    | 3   | .4 | 1 | 20 | 1328 | 1347 | UGGUA            | CGAG              | ge     | 1 |
| trf_6_3 | Bra016 | 9.  |    |   |    |      |      | GUCGUUGUAGUUAUAG | UACUAUUUAUACUACAA | Cleava |   |
| 90      | 584    | 3   | 9  | 1 | 20 | 1045 | 1064 | UGGUA            | AGGC              | ge     | 1 |
| trf_6_3 | Bra035 | 10  |    |   |    |      |      | GUCGUUGUAGUUAUAG | UACCACAAUACUUCAA  | Cleava |   |
| 90      | 409    | 3   | .4 | 1 | 20 | 1328 | 1347 | UGGUA            | CGAG              | ge     | 1 |
| trf_6_3 | Bra016 | 9.  |    |   |    |      |      | GUCGUUGUAGUUAUAG | UACUAUUUAUACUACAA | Cleava |   |
| 91      | 584    | 3   | 9  | 1 | 20 | 1045 | 1064 | UGGUA            | AGGC              | ge     | 1 |
| trf_6_3 | Bra035 | 10  |    |   |    |      |      | GUCGUUGUAGUUAUAG | UACCACAAUACUUCAA  | Cleava |   |
| 91      | 409    | 3   | .4 | 1 | 20 | 1328 | 1347 | UGGUA            | CGAG              | ge     | 1 |
| trf_6_3 | Bra016 | 9.  |    |   |    |      |      | GUCGUUGUAGUUAUAG | UACUAUUUAUACUACAA | Cleava |   |
| 92      | 584    | 3   | 9  | 1 | 20 | 1045 | 1064 | UGGUA            | AGGC              | ge     | 1 |

|         |        |    |    |   |    |      |      |               |                  |        |   |
|---------|--------|----|----|---|----|------|------|---------------|------------------|--------|---|
| trf_6_3 | Bra035 | 10 |    |   |    |      |      | GUCGUUGUAGUAG | UACCACAAUACUCAA  | Cleava |   |
| 92      | 409    | 3  | .4 | 1 | 20 | 1328 | 1347 | UGGUA         | CGAG             | ge     | 1 |
| trf_6_3 | Bra016 | 9. |    |   |    |      |      | GUCGUUGUAGUAG | UACUAUUAUACUACAA | Cleava |   |
| 93      | 584    | 3  | 9  | 1 | 20 | 1045 | 1064 | UGGUA         | AGGC             | ge     | 1 |
| trf_6_3 | Bra035 | 10 |    |   |    |      |      | GUCGUUGUAGUAG | UACCACAAUACUCAA  | Cleava |   |
| 93      | 409    | 3  | .4 | 1 | 20 | 1328 | 1347 | UGGUA         | CGAG             | ge     | 1 |
| trf_6_3 | Bra016 | 9. |    |   |    |      |      | GUCGUUGUAGUAG | UACUAUUAUACUACAA | Cleava |   |
| 94      | 584    | 3  | 9  | 1 | 20 | 1045 | 1064 | UGGUA         | AGGC             | ge     | 1 |
| trf_6_3 | Bra035 | 10 |    |   |    |      |      | GUCGUUGUAGUAG | UACCACAAUACUCAA  | Cleava |   |
| 94      | 409    | 3  | .4 | 1 | 20 | 1328 | 1347 | UGGUA         | CGAG             | ge     | 1 |
| trf_6_3 | Bra016 | 9. |    |   |    |      |      | GUCGUUGUAGUAG | UACUAUUAUACUACAA | Cleava |   |
| 95      | 584    | 3  | 9  | 1 | 20 | 1045 | 1064 | UGGUA         | AGGC             | ge     | 1 |
| trf_6_3 | Bra035 | 10 |    |   |    |      |      | GUCGUUGUAGUAG | UACCACAAUACUCAA  | Cleava |   |
| 95      | 409    | 3  | .4 | 1 | 20 | 1328 | 1347 | UGGUA         | CGAG             | ge     | 1 |
| trf_6_3 | Bra016 | 9. |    |   |    |      |      | GUCGUUGUAGUAG | UACUAUUAUACUACAA | Cleava |   |
| 96      | 584    | 3  | 9  | 1 | 20 | 1045 | 1064 | UGGUA         | AGGC             | ge     | 1 |
| trf_6_3 | Bra035 | 10 |    |   |    |      |      | GUCGUUGUAGUAG | UACCACAAUACUCAA  | Cleava |   |
| 96      | 409    | 3  | .4 | 1 | 20 | 1328 | 1347 | UGGUA         | CGAG             | ge     | 1 |
| trf_6_3 | Bra016 | 9. |    |   |    |      |      | GUCGUUGUAGUAG | UACUAUUAUACUACAA | Cleava |   |
| 97      | 584    | 3  | 9  | 1 | 20 | 1045 | 1064 | UGGUA         | AGGC             | ge     | 1 |
| trf_6_3 | Bra035 | 10 |    |   |    |      |      | GUCGUUGUAGUAG | UACCACAAUACUCAA  | Cleava |   |
| 97      | 409    | 3  | .4 | 1 | 20 | 1328 | 1347 | UGGUA         | CGAG             | ge     | 1 |
| trf_6_3 | Bra016 | 9. |    |   |    |      |      | GUCGUUGUAGUAG | UACUAUUAUACUACAA | Cleava |   |
| 98      | 584    | 3  | 9  | 1 | 20 | 1045 | 1064 | UGGUA         | AGGC             | ge     | 1 |
| trf_6_3 | Bra035 | 10 |    |   |    |      |      | GUCGUUGUAGUAG | UACCACAAUACUCAA  | Cleava |   |
| 98      | 409    | 3  | .4 | 1 | 20 | 1328 | 1347 | UGGUA         | CGAG             | ge     | 1 |
| trf_6_3 | Bra016 | 9. |    |   |    |      |      | GUCGUUGUAGUAG | UACUAUUAUACUACAA | Cleava |   |
| 99      | 584    | 3  | 9  | 1 | 20 | 1045 | 1064 | UGGUA         | AGGC             | ge     | 1 |
| trf_6_3 | Bra035 | 10 |    |   |    |      |      | GUCGUUGUAGUAG | UACCACAAUACUCAA  | Cleava |   |
| 99      | 409    | 3  | .4 | 1 | 20 | 1328 | 1347 | UGGUA         | CGAG             | ge     | 1 |
| trf_6_4 | Bra016 | 9. |    |   |    |      |      | GUCGUUGUAGUAG | UACUAUUAUACUACAA | Cleava |   |
| 00      | 584    | 3  | 9  | 1 | 20 | 1045 | 1064 | UGGUA         | AGGC             | ge     | 1 |
| trf_6_4 | Bra035 | 10 |    |   |    |      |      | GUCGUUGUAGUAG | UACCACAAUACUCAA  | Cleava |   |
| 00      | 409    | 3  | .4 | 1 | 20 | 1328 | 1347 | UGGUA         | CGAG             | ge     | 1 |



|         |        |    |    |   |    |      |      |                  |                   |        |   |
|---------|--------|----|----|---|----|------|------|------------------|-------------------|--------|---|
| trf_6_4 | Bra016 | 9. |    |   |    |      |      | GUCGUUGUAGUAG    | UACUAUUUACUACAA   | Cleava |   |
| 01      | 584    | 3  | 9  | 1 | 20 | 1045 | 1064 | UGGUA            | AGGC              | ge     | 1 |
| trf_6_4 | Bra035 | 10 |    |   |    |      |      | GUCGUUGUAGUAG    | UACCACAAUACUCAA   | Cleava |   |
| 01      | 409    | 3  | .4 | 1 | 20 | 1328 | 1347 | UGGUA            | CGAG              | ge     | 1 |
| trf_6_4 | Bra009 | 14 |    |   |    |      |      | GGGGAUGUAGCUCAGA | UUAUCAUCUGGGCUUC  | Cleava |   |
| 02      | 876    | 3  | .9 | 1 | 22 | 16   | 37   | UGGUAG           | GUCCUC            | ge     | 1 |
| trf_6_4 | Bra016 | 10 |    |   |    |      |      | GGGGAUGUAGCUCAGA | UUAUCAUCUGAGCUUC  | Cleava |   |
| 02      | 141    | 3  | .4 | 1 | 22 | 3031 | 3052 | UGGUAG           | GUUCUC            | ge     | 1 |
| trf_6_4 | Bra036 | 20 |    |   |    |      |      | GGGGAUGUAGCUCAGA | UCGACUGGCUGAGCUA  | Cleava |   |
| 02      | 771    | 3  | .2 | 1 | 23 | 5375 | 5397 | UGGUAGA          | CAUUCCU           | ge     | 1 |
| trf_6_4 | Bra018 | 8. |    |   |    |      |      | GGGGAUGUAGCUCAGA | GCCACCUCAGCUACAUC | Cleava |   |
| 02      | 620    | 3  | 3  | 1 | 20 | 7    | 26   | UGGU             | CUC               | ge     | 1 |
| trf_6_4 | Bra009 | 14 |    |   |    |      |      | GGGGAUGUAGCUCAGA | UUAUCAUCUGGGCUUC  | Cleava |   |
| 03      | 876    | 3  | .9 | 1 | 22 | 16   | 37   | UGGUAG           | GUCCUC            | ge     | 1 |
| trf_6_4 | Bra016 | 10 |    |   |    |      |      | GGGGAUGUAGCUCAGA | UUAUCAUCUGAGCUUC  | Cleava |   |
| 03      | 141    | 3  | .4 | 1 | 22 | 3031 | 3052 | UGGUAG           | GUUCUC            | ge     | 1 |
| trf_6_4 | Bra036 | 20 |    |   |    |      |      | GGGGAUGUAGCUCAGA | UCGACUGGCUGAGCUA  | Cleava |   |
| 03      | 771    | 3  | .2 | 1 | 23 | 5375 | 5397 | UGGUAGA          | CAUUCCU           | ge     | 1 |
| trf_6_4 | Bra018 | 8. |    |   |    |      |      | GGGGAUGUAGCUCAGA | GCCACCUCAGCUACAUC | Cleava |   |
| 03      | 620    | 3  | 3  | 1 | 20 | 7    | 26   | UGGU             | CUC               | ge     | 1 |
| trf_6_4 | Bra014 | 17 |    |   |    |      |      | GGGGAUGUAGCUCAUA | UGUAUUUUAUUAGCU   | Cleava |   |
| 04      | 507    | 3  | .0 | 1 | 23 | 541  | 563  | UGGUAGA          | AUAUCUCC          | ge     | 1 |
| trf_6_4 | Bra016 | 9. |    |   |    |      |      | GUCGUUGUAGUAG    | UACUAUUUACUACAA   | Cleava |   |
| 05      | 584    | 3  | 9  | 1 | 20 | 1045 | 1064 | UGGUA            | AGGC              | ge     | 1 |
| trf_6_4 | Bra035 | 10 |    |   |    |      |      | GUCGUUGUAGUAG    | UACCACAAUACUCAA   | Cleava |   |
| 05      | 409    | 3  | .4 | 1 | 20 | 1328 | 1347 | UGGUA            | CGAG              | ge     | 1 |
| trf_6_4 | Bra016 | 9. |    |   |    |      |      | GUCGUUGUAGUAG    | UACUAUUUACUACAA   | Cleava |   |
| 06      | 584    | 3  | 9  | 1 | 20 | 1045 | 1064 | UGGUA            | AGGC              | ge     | 1 |
| trf_6_4 | Bra035 | 10 |    |   |    |      |      | GUCGUUGUAGUAG    | UACCACAAUACUCAA   | Cleava |   |
| 06      | 409    | 3  | .4 | 1 | 20 | 1328 | 1347 | UGGUA            | CGAG              | ge     | 1 |
| trf_6_4 | Bra016 | 9. |    |   |    |      |      | GUCGUUGUAGUAG    | UACUAUUUACUACAA   | Cleava |   |
| 07      | 584    | 3  | 9  | 1 | 20 | 1045 | 1064 | UGGUA            | AGGC              | ge     | 1 |
| trf_6_4 | Bra035 | 10 |    |   |    |      |      | GUCGUUGUAGUAG    | UACCACAAUACUCAA   | Cleava |   |
| 07      | 409    | 3  | .4 | 1 | 20 | 1328 | 1347 | UGGUA            | CGAG              | ge     | 1 |

|         |        |    |    |   |    |      |      |                  |                   |        |   |
|---------|--------|----|----|---|----|------|------|------------------|-------------------|--------|---|
| trf_6_4 | Bra016 | 9. |    |   |    |      |      | GUCGUUGUAGUAG    | UACUAUUAUACUACAA  | Cleava |   |
| 08      | 584    | 3  | 9  | 1 | 20 | 1045 | 1064 | UGGUA            | AGGC              | ge     | 1 |
| trf_6_4 | Bra035 | 10 |    |   |    |      |      | GUCGUUGUAGUAG    | UACCACAAUACUUCAA  | Cleava |   |
| 08      | 409    | 3  | .4 | 1 | 20 | 1328 | 1347 | UGGUA            | CGAG              | ge     | 1 |
| trf_6_4 | Bra009 | 14 |    |   |    |      |      | GGGGAUGUAGCUCAGA | UUAUCAUCUGGGCUUC  | Cleava |   |
| 09      | 876    | 3  | .9 | 1 | 22 | 16   | 37   | UGGUAG           | GUCCUC            | ge     | 1 |
| trf_6_4 | Bra016 | 10 |    |   |    |      |      | GGGGAUGUAGCUCAGA | UUAUCAUCUGAGCUUC  | Cleava |   |
| 09      | 141    | 3  | .4 | 1 | 22 | 3031 | 3052 | UGGUAG           | GUUCUC            | ge     | 1 |
| trf_6_4 | Bra036 | 20 |    |   |    |      |      | GGGGAUGUAGCUCAGA | UCGACUGGCUGAGCUA  | Cleava |   |
| 09      | 771    | 3  | .2 | 1 | 23 | 5375 | 5397 | UGGUAGA          | CAUUCCU           | ge     | 1 |
| trf_6_4 | Bra018 | 8. |    |   |    |      |      | GGGGAUGUAGCUCAGA | GCCACCUCAGCUACAUC | Cleava |   |
| 09      | 620    | 3  | 3  | 1 | 20 | 7    | 26   | UGGU             | CUC               | ge     | 1 |
| trf_6_4 | Bra016 | 9. |    |   |    |      |      | GUCGUUGUAGUAG    | UACUAUUAUACUACAA  | Cleava |   |
| 10      | 584    | 3  | 9  | 1 | 20 | 1045 | 1064 | UGGUA            | AGGC              | ge     | 1 |
| trf_6_4 | Bra035 | 10 |    |   |    |      |      | GUCGUUGUAGUAG    | UACCACAAUACUUCAA  | Cleava |   |
| 10      | 409    | 3  | .4 | 1 | 20 | 1328 | 1347 | UGGUA            | CGAG              | ge     | 1 |
| trf_6_4 | Bra016 | 9. |    |   |    |      |      | GUCGUUGUAGUAG    | UACUAUUAUACUACAA  | Cleava |   |
| 11      | 584    | 3  | 9  | 1 | 20 | 1045 | 1064 | UGGUA            | AGGC              | ge     | 1 |
| trf_6_4 | Bra035 | 10 |    |   |    |      |      | GUCGUUGUAGUAG    | UACCACAAUACUUCAA  | Cleava |   |
| 11      | 409    | 3  | .4 | 1 | 20 | 1328 | 1347 | UGGUA            | CGAG              | ge     | 1 |
| trf_6_4 | Bra016 | 9. |    |   |    |      |      | GUCGUUGUAGUAG    | UACUAUUAUACUACAA  | Cleava |   |
| 12      | 584    | 3  | 9  | 1 | 20 | 1045 | 1064 | UGGUA            | AGGC              | ge     | 1 |
| trf_6_4 | Bra035 | 10 |    |   |    |      |      | GUCGUUGUAGUAG    | UACCACAAUACUUCAA  | Cleava |   |
| 12      | 409    | 3  | .4 | 1 | 20 | 1328 | 1347 | UGGUA            | CGAG              | ge     | 1 |
| trf_6_4 | Bra016 | 9. |    |   |    |      |      | GUCGUUGUAGUAG    | UACUAUUAUACUACAA  | Cleava |   |
| 13      | 584    | 3  | 9  | 1 | 20 | 1045 | 1064 | UGGUA            | AGGC              | ge     | 1 |
| trf_6_4 | Bra035 | 10 |    |   |    |      |      | GUCGUUGUAGUAG    | UACCACAAUACUUCAA  | Cleava |   |
| 13      | 409    | 3  | .4 | 1 | 20 | 1328 | 1347 | UGGUA            | CGAG              | ge     | 1 |
| trf_6_4 | Bra016 | 9. |    |   |    |      |      | GUCGUUGUAGUAG    | UACUAUUAUACUACAA  | Cleava |   |
| 14      | 584    | 3  | 9  | 1 | 20 | 1045 | 1064 | UGGUA            | AGGC              | ge     | 1 |
| trf_6_4 | Bra035 | 10 |    |   |    |      |      | GUCGUUGUAGUAG    | UACCACAAUACUUCAA  | Cleava |   |
| 14      | 409    | 3  | .4 | 1 | 20 | 1328 | 1347 | UGGUA            | CGAG              | ge     | 1 |
| trf_6_4 | Bra009 | 14 |    |   |    |      |      | GGGGAUGUAGCUCAGA | UUAUCAUCUGGGCUUC  | Cleava |   |
| 15      | 876    | 3  | .9 | 1 | 22 | 16   | 37   | UGGUAG           | GUCCUC            | ge     | 1 |

|         |        |     |    |   |    |      |      |                  |                   |        |   |
|---------|--------|-----|----|---|----|------|------|------------------|-------------------|--------|---|
| trf_6_4 | Bra016 | 10  |    |   |    |      |      | GGGGAUGUAGCUCAGA | UUAUCAUCUGAGCUUC  | Cleava |   |
| 15      | 141    | 3   | .4 | 1 | 22 | 3031 | 3052 | UGGUAG           | GUUCUC            | ge     | 1 |
| trf_6_4 | Bra036 | 20  |    |   |    |      |      | GGGGAUGUAGCUCAGA | UCGACUGGCUGAGCUA  | Cleava |   |
| 15      | 771    | 3   | .2 | 1 | 23 | 5375 | 5397 | UGGUAGA          | CAUUCCU           | ge     | 1 |
| trf_6_4 | Bra018 | 8.  |    |   |    |      |      | GGGGAUGUAGCUCAGA | GCCACCUCAGCUACAUC | Cleava |   |
| 15      | 620    | 3   | 3  | 1 | 20 | 7    | 26   | UGGU             | CUC               | ge     | 1 |
| trf_6_4 | Bra009 | 14  |    |   |    |      |      | GGGGAUGUAGCUCAGA | UUAUCAUCUGGGCUUC  | Cleava |   |
| 16      | 876    | 3   | .9 | 1 | 22 | 16   | 37   | UGGUAG           | GUCCUC            | ge     | 1 |
| trf_6_4 | Bra016 | 10  |    |   |    |      |      | GGGGAUGUAGCUCAGA | UUAUCAUCUGAGCUUC  | Cleava |   |
| 16      | 141    | 3   | .4 | 1 | 22 | 3031 | 3052 | UGGUAG           | GUUCUC            | ge     | 1 |
| trf_6_4 | Bra036 | 20  |    |   |    |      |      | GGGGAUGUAGCUCAGA | UCGACUGGCUGAGCUA  | Cleava |   |
| 16      | 771    | 3   | .2 | 1 | 23 | 5375 | 5397 | UGGUAGA          | CAUUCCU           | ge     | 1 |
| trf_6_4 | Bra018 | 8.  |    |   |    |      |      | GGGGAUGUAGCUCAGA | GCCACCUCAGCUACAUC | Cleava |   |
| 16      | 620    | 3   | 3  | 1 | 20 | 7    | 26   | UGGU             | CUC               | ge     | 1 |
| trf_6_4 | Bra007 | 14  |    |   |    |      |      | GCACCAGUGGUCUAGU | UUACUACUGGACCUUU  | Cleava |   |
| 18      | 154    | 2.5 | .1 | 1 | 21 | 510  | 530  | GGUAG            | GGUGC             | ge     | 1 |
| trf_6_4 | Bra007 | 14  |    |   |    |      |      | GCACCAGUGGUCUAGU | UACUACUGGACCUUUG  | Cleava |   |
| 19      | 154    | 2.5 | .1 | 1 | 20 | 511  | 530  | GGUA             | GUGC              | ge     | 1 |
| trf_6_4 | Bra007 | 14  |    |   |    |      |      | GCACCAGUGGUCUAGU | UACUACUGGACCUUUG  | Cleava |   |
| 20      | 154    | 2.5 | .1 | 1 | 20 | 511  | 530  | GGUA             | GUGC              | ge     | 1 |
| trf_6_4 | Bra003 | 16  |    |   |    |      |      | GGGAUUGUAGUUCAA  | ACCAGUUGAAUUACAA  | Cleava |   |
| 22      | 753    | 2.5 | .2 | 1 | 20 | 284  | 303  | UCGGU            | UCCU              | ge     | 1 |
| trf_6_4 | Bra003 | 16  |    |   |    |      |      | GGGAUUGUAGUUCAA  | ACCAGUUGAAUUACAA  | Cleava |   |
| 23      | 753    | 1.5 | .2 | 1 | 20 | 284  | 303  | UUGGU            | UCCU              | ge     | 1 |
| trf_6_4 | Bra013 | 19  |    |   |    |      |      | GGGAUUGUAGUUCAA  | ACUAAUUGAACUAAGA  | Cleava |   |
| 23      | 336    | 3   | .5 | 1 | 20 | 267  | 286  | UUGGU            | UCUC              | ge     | 1 |
| trf_6_4 | Bra021 | 23  |    |   |    |      |      | GGGAUUGUAGUUCAA  | ACCAACUGAACUGCAA  | Cleava |   |
| 23      | 314    | 3   | .2 | 1 | 20 | 234  | 253  | UUGGU            | UCUG              | ge     | 1 |
| trf_6_4 | Bra003 | 16  |    |   |    |      |      | GGGAUUGUAGUUCAA  | ACCAGUUGAAUUACAA  | Cleava |   |
| 24      | 753    | 1.5 | .2 | 1 | 20 | 284  | 303  | UUGGU            | UCCU              | ge     | 1 |
| trf_6_4 | Bra013 | 19  |    |   |    |      |      | GGGAUUGUAGUUCAA  | ACUAAUUGAACUAAGA  | Cleava |   |
| 24      | 336    | 3   | .5 | 1 | 20 | 267  | 286  | UUGGU            | UCUC              | ge     | 1 |
| trf_6_4 | Bra021 | 23  |    |   |    |      |      | GGGAUUGUAGUUCAA  | ACCAACUGAACUGCAA  | Cleava |   |
| 24      | 314    | 3   | .2 | 1 | 20 | 234  | 253  | UUGGU            | UCUG              | ge     | 1 |

|         |        |     |    |   |    |     |     |               |                  |          |   |
|---------|--------|-----|----|---|----|-----|-----|---------------|------------------|----------|---|
| trf_6_4 | Bra003 | 16  |    |   |    |     |     | GGGAUUGUAGUUC | ACCAGUUGAAUUACA  | Cleavage |   |
| 25      | 753    | 1.5 | .2 | 1 | 20 | 284 | 303 | UUGGU         | UCCU             | ge       | 1 |
| trf_6_4 | Bra013 | 19  |    |   |    |     |     | GGGAUUGUAGUUC | ACUAAUUGAACUAAGA | Cleavage |   |
| 25      | 336    | 3   | .5 | 1 | 20 | 267 | 286 | UUGGU         | UCUC             | ge       | 1 |
| trf_6_4 | Bra021 | 23  |    |   |    |     |     | GGGAUUGUAGUUC | ACCAACUGAACUGCAA | Cleavage |   |
| 25      | 314    | 3   | .2 | 1 | 20 | 234 | 253 | UUGGU         | UCUG             | ge       | 1 |
| trf_6_4 | Bra003 | 16  |    |   |    |     |     | GGGAUUGUAGUUC | ACCAGUUGAAUUACA  | Cleavage |   |
| 27      | 753    | 1.5 | .2 | 1 | 20 | 284 | 303 | UUGGU         | UCCU             | ge       | 1 |
| trf_6_4 | Bra013 | 19  |    |   |    |     |     | GGGAUUGUAGUUC | ACUAAUUGAACUAAGA | Cleavage |   |
| 27      | 336    | 3   | .5 | 1 | 20 | 267 | 286 | UUGGU         | UCUC             | ge       | 1 |
| trf_6_4 | Bra021 | 23  |    |   |    |     |     | GGGAUUGUAGUUC | ACCAACUGAACUGCAA | Cleavage |   |
| 27      | 314    | 3   | .2 | 1 | 20 | 234 | 253 | UUGGU         | UCUG             | ge       | 1 |
| trf_6_4 | Bra003 | 16  |    |   |    |     |     | GGGAUUGUAGUUC | ACCAGUUGAAUUACA  | Cleavage |   |
| 28      | 753    | 2.5 | .2 | 1 | 20 | 284 | 303 | UUGGA         | UCCU             | ge       | 1 |
| trf_6_4 | Bra003 | 16  |    |   |    |     |     | GGGAUUGUAGUUC | ACCAGUUGAAUUACA  | Cleavage |   |
| 29      | 753    | 2.5 | .2 | 1 | 20 | 284 | 303 | UCGGU         | UCCU             | ge       | 1 |
| trf_6_4 | Bra003 | 16  |    |   |    |     |     | GGGAUUGUAGUUC | ACCAGUUGAAUUACA  | Cleavage |   |
| 30      | 753    | 1.5 | .2 | 1 | 20 | 284 | 303 | UUGGU         | UCCU             | ge       | 1 |
| trf_6_4 | Bra013 | 19  |    |   |    |     |     | GGGAUUGUAGUUC | ACUAAUUGAACUAAGA | Cleavage |   |
| 30      | 336    | 3   | .5 | 1 | 20 | 267 | 286 | UUGGU         | UCUC             | ge       | 1 |
| trf_6_4 | Bra021 | 23  |    |   |    |     |     | GGGAUUGUAGUUC | ACCAACUGAACUGCAA | Cleavage |   |
| 30      | 314    | 3   | .2 | 1 | 20 | 234 | 253 | UUGGU         | UCUG             | ge       | 1 |
| trf_6_4 | Bra003 | 16  |    |   |    |     |     | GGGAUUGUAGUUC | ACCAGUUGAAUUACA  | Cleavage |   |
| 31      | 753    | 2.5 | .2 | 1 | 20 | 284 | 303 | UCGGU         | UCCU             | ge       | 1 |
| trf_6_4 | Bra003 | 16  |    |   |    |     |     | GGGAUUGUAGUUC | ACCAGUUGAAUUACA  | Cleavage |   |
| 32      | 753    | 1.5 | .2 | 1 | 20 | 284 | 303 | UUGGU         | UCCU             | ge       | 1 |
| trf_6_4 | Bra013 | 19  |    |   |    |     |     | GGGAUUGUAGUUC | ACUAAUUGAACUAAGA | Cleavage |   |
| 32      | 336    | 3   | .5 | 1 | 20 | 267 | 286 | UUGGU         | UCUC             | ge       | 1 |
| trf_6_4 | Bra021 | 23  |    |   |    |     |     | GGGAUUGUAGUUC | ACCAACUGAACUGCAA | Cleavage |   |
| 32      | 314    | 3   | .2 | 1 | 20 | 234 | 253 | UUGGU         | UCUG             | ge       | 1 |
| trf_6_4 | Bra003 | 16  |    |   |    |     |     | GGGAUUGUAGUUC | ACCAGUUGAAUUACA  | Cleavage |   |
| 33      | 753    | 1.5 | .2 | 1 | 20 | 284 | 303 | UUGGU         | UCCU             | ge       | 1 |
| trf_6_4 | Bra013 | 19  |    |   |    |     |     | GGGAUUGUAGUUC | ACUAAUUGAACUAAGA | Cleavage |   |
| 33      | 336    | 3   | .5 | 1 | 20 | 267 | 286 | UUGGU         | UCUC             | ge       | 1 |

|         |        |     |    |   |    |      |      |                  |                  |          |   |
|---------|--------|-----|----|---|----|------|------|------------------|------------------|----------|---|
| trf_6_4 | Bra021 | 23  |    |   |    |      |      | GGGAUUGUAGUUCAA  | ACCAACUGAACUGCAA | Cleavage | 1 |
| 33      | 314    | 3   | .2 | 1 | 20 | 234  | 253  | UUGGU            | UCUG             | ge       |   |
| trf_6_4 | Bra003 | 16  |    |   |    |      |      | GGGAUUGUAGUUCAA  | ACCAGUUGAAUUACAA | Cleavage | 1 |
| 34      | 753    | 1.5 | .2 | 1 | 20 | 284  | 303  | UUGGU            | UCCU             | ge       |   |
| trf_6_4 | Bra013 | 19  |    |   |    |      |      | GGGAUUGUAGUUCAA  | ACUAAUUGAACUAAGA | Cleavage | 1 |
| 34      | 336    | 3   | .5 | 1 | 20 | 267  | 286  | UUGGU            | UCUC             | ge       |   |
| trf_6_4 | Bra021 | 23  |    |   |    |      |      | GGGAUUGUAGUUCAA  | ACCAACUGAACUGCAA | Cleavage | 1 |
| 34      | 314    | 3   | .2 | 1 | 20 | 234  | 253  | UUGGU            | UCUG             | ge       |   |
| trf_6_4 | Bra003 | 16  |    |   |    |      |      | GGGAUUGUAGUUCAA  | ACCAGUUGAAUUACAA | Cleavage | 1 |
| 37      | 753    | 2.5 | .2 | 1 | 20 | 284  | 303  | UUGGA            | UCCU             | ge       |   |
| trf_6_4 | Bra013 | 22  |    |   |    |      |      | UCCGUUGUAGUCUAGC | CAUCAUCAGCUUGGCU | Cleavage | 1 |
| 41      | 528    | 3   | .0 | 1 | 24 | 196  | 219  | UGGUCAGG         | AUAACGGG         | ge       |   |
| trf_6_4 | Bra033 | 24  |    |   |    |      |      | CCGACCUUAGCUCAGU | UCAACCAACGGAGUUG | Cleavage | 1 |
| 42      | 406    | 3   | .4 | 1 | 23 | 30   | 52   | UGGUAGA          | GGGUUGG          | ge       |   |
| trf_6_4 | Bra033 | 24  |    |   |    |      |      | CCGACCUUAGCUCAGU | UCAACCAACGGAGUUG | Cleavage | 1 |
| 42      | 405    | 3   | .4 | 1 | 23 | 30   | 52   | UGGUAGA          | GGGUUGG          | ge       |   |
| trf_6_4 | Bra004 | 20  |    |   |    |      |      | CCGACCUUAGCUCAGU | GUUAACUGGGCUAAGG | Cleavage | 1 |
| 42      | 481    | 3   | .0 | 1 | 20 | 1660 | 1679 | UGGU             | UCGC             | ge       |   |
| trf_6_4 | Bra033 | 24  |    |   |    |      |      | CCGACCUUAGCUCAGU | UCAACCAACGGAGUUG | Cleavage | 1 |
| 43      | 406    | 3   | .4 | 1 | 23 | 30   | 52   | UGGUAGA          | GGGUUGG          | ge       |   |
| trf_6_4 | Bra033 | 24  |    |   |    |      |      | CCGACCUUAGCUCAGU | UCAACCAACGGAGUUG | Cleavage | 1 |
| 43      | 405    | 3   | .4 | 1 | 23 | 30   | 52   | UGGUAGA          | GGGUUGG          | ge       |   |
| trf_6_4 | Bra004 | 20  |    |   |    |      |      | CCGACCUUAGCUCAGU | GUUAACUGGGCUAAGG | Cleavage | 1 |
| 43      | 481    | 3   | .0 | 1 | 20 | 1660 | 1679 | UGGU             | UCGC             | ge       |   |
| trf_6_4 | Bra007 | 14  |    |   |    |      |      | GCACCAGUGGUCUAGU | UACUACUGGACCUUUG | Cleavage | 1 |
| 45      | 154    | 2.5 | .1 | 1 | 20 | 511  | 530  | GGUA             | GUGC             | ge       |   |
| trf_6_4 | Bra007 | 14  |    |   |    |      |      | GCACCAGUGGUCUAGU | UUACUACUGGACCUUU | Cleavage | 1 |
| 46      | 154    | 2.5 | .1 | 1 | 21 | 510  | 530  | GGUAG            | GGUGC            | ge       |   |
| trf_6_4 | Bra014 | 17  |    |   |    |      |      | GGGGAUGUAGCUCAUA | UGUAUUUAUUAGCU   | Cleavage | 1 |
| 47      | 507    | 3   | .0 | 1 | 23 | 541  | 563  | UGGUAGA          | AUAUCUCC         | ge       |   |
| trf_6_4 | Bra009 | 14  |    |   |    |      |      | GGGGAUGUAGCUCAGA | UUAUCAUCUGGGCUUC | Cleavage | 1 |
| 48      | 876    | 3   | .9 | 1 | 22 | 16   | 37   | UGGUAG           | GUCCUC           | ge       |   |
| trf_6_4 | Bra016 | 10  |    |   |    |      |      | GGGGAUGUAGCUCAGA | UUAUCAUCUGAGCUUC | Cleavage | 1 |
| 48      | 141    | 3   | .4 | 1 | 22 | 3031 | 3052 | UGGUAG           | GUUCUC           | ge       |   |

|         |        |    |    |   |    |      |      |                  |                   |        |   |
|---------|--------|----|----|---|----|------|------|------------------|-------------------|--------|---|
| trf_6_4 | Bra036 | 20 |    |   |    |      |      | GGGGAUGUAGCUCAGA | UCGACUGGCUGAGCUA  | Cleava |   |
| 48      | 771    | 3  | .2 | 1 | 23 | 5375 | 5397 | UGGUAGA          | CAUUCCU           | ge     | 1 |
| trf_6_4 | Bra018 | 8. |    |   |    |      |      | GGGGAUGUAGCUCAGA | GCCACCUCAGCUACAUC | Cleava |   |
| 48      | 620    | 3  | 3  | 1 | 20 | 7    | 26   | UGGU             | CUC               | ge     | 1 |
| trf_6_4 | Bra009 | 14 |    |   |    |      |      | GGGGAUGUAGCUCAGA | AUCAUCUGGGCUUCGU  | Cleava |   |
| 49      | 876    | 3  | .9 | 1 | 20 | 18   | 37   | UGGU             | CCUC              | ge     | 1 |
| trf_6_4 | Bra016 | 10 |    |   |    |      |      | GGGGAUGUAGCUCAGA | AUCAUCUGAGCUUCGU  | Cleava |   |
| 49      | 141    | 3  | .4 | 1 | 20 | 3033 | 3052 | UGGU             | UCUC              | ge     | 1 |
| trf_6_4 | Bra036 | 20 |    |   |    |      |      | GGGGAUGUAGCUCAGA | ACUGGCUGAGCUACAU  | Cleava |   |
| 49      | 771    | 3  | .2 | 1 | 20 | 5378 | 5397 | UGGU             | UCCU              | ge     | 1 |
| trf_6_4 | Bra018 | 8. |    |   |    |      |      | GGGGAUGUAGCUCAGA | GCCACCUCAGCUACAUC | Cleava |   |
| 49      | 620    | 3  | 3  | 1 | 20 | 7    | 26   | UGGU             | CUC               | ge     | 1 |
| trf_6_4 | Bra014 | 17 |    |   |    |      |      | GGGGAUGUAGCUCAUA | UGUAUUUAUUAGCU    | Cleava |   |
| 50      | 507    | 3  | .0 | 1 | 23 | 541  | 563  | UGGUAGA          | AUAUCUCC          | ge     | 1 |
| trf_6_4 | Bra014 | 17 |    |   |    |      |      | GGGGAUGUAGCUCAUA | UUGUAUUUAUUAGC    | Cleava |   |
| 51      | 507    | 3  | .0 | 1 | 24 | 540  | 563  | UGGUAGAG         | UAUAUCUCC         | ge     | 1 |
| trf_6_4 | Bra009 | 14 |    |   |    |      |      | GGGGAUGUAGCUCAGA | UUAUCAUCUGGGCUUC  | Cleava |   |
| 52      | 876    | 3  | .9 | 1 | 22 | 16   | 37   | UGGUAG           | GUCCUC            | ge     | 1 |
| trf_6_4 | Bra016 | 10 |    |   |    |      |      | GGGGAUGUAGCUCAGA | UUAUCAUCUGAGCUUC  | Cleava |   |
| 52      | 141    | 3  | .4 | 1 | 22 | 3031 | 3052 | UGGUAG           | GUUCUC            | ge     | 1 |
| trf_6_4 | Bra036 | 20 |    |   |    |      |      | GGGGAUGUAGCUCAGA | UCGACUGGCUGAGCUA  | Cleava |   |
| 52      | 771    | 3  | .2 | 1 | 23 | 5375 | 5397 | UGGUAGA          | CAUUCCU           | ge     | 1 |
| trf_6_4 | Bra018 | 8. |    |   |    |      |      | GGGGAUGUAGCUCAGA | GCCACCUCAGCUACAUC | Cleava |   |
| 52      | 620    | 3  | 3  | 1 | 20 | 7    | 26   | UGGU             | CUC               | ge     | 1 |
| trf_6_4 | Bra013 | 16 |    |   |    |      |      | UCCGUUGUCGUCCAGC | UAACCGAUGGAUGUCA  | Cleava |   |
| 61      | 584    | 3  | .4 | 1 | 21 | 890  | 910  | GGUUA            | AUGGA             | ge     | 1 |
| trf_6_4 | Bra000 | 11 |    |   |    |      |      | UCCGUUGUCGUCCAGC | UAACCGGAGGACGAUA  | Cleava |   |
| 61      | 529    | 3  | .2 | 1 | 21 | 984  | 1004 | GGUUA            | AUGGA             | ge     | 1 |
| trf_6_4 | Bra013 | 16 |    |   |    |      |      | UCCGUUGUCGUCCAGC | AUGAUAACCGAUGGAU  | Cleava |   |
| 62      | 584    | 3  | .4 | 1 | 25 | 886  | 910  | GGUUAGGAU        | GUCAAUGGA         | ge     | 1 |
| trf_6_4 | Bra000 | 11 |    |   |    |      |      | UCCGUUGUCGUCCAGC | UAACCGGAGGACGAUA  | Cleava |   |
| 62      | 529    | 3  | .2 | 1 | 21 | 984  | 1004 | GGUUA            | AUGGA             | ge     | 1 |
| trf_6_4 | Bra013 | 16 |    |   |    |      |      | UCCGUUGUCGUCCAGC | UAUGAUAACCGAUGGA  | Cleava |   |
| 63      | 584    | 3  | .4 | 1 | 26 | 885  | 910  | GGUUAGGAUA       | UGUCAAUUGGA       | ge     | 1 |

|         |        |     |    |   |    |     |      |                  |                  |        |   |
|---------|--------|-----|----|---|----|-----|------|------------------|------------------|--------|---|
| trf_6_4 | Bra000 | 11  |    |   |    |     |      | UCCGUUGUCGUCCAGC | UAACCGGAGGACGAUA | Cleava |   |
| 63      | 529    | 3   | .2 | 1 | 21 | 984 | 1004 | GGUUA            | AUGGA            | ge     | 1 |
| trf_6_4 | Bra013 | 16  |    |   |    |     |      | UCCGUUGUCGUCCAGC | UAUGAUAACCGAUGGA | Cleava |   |
| 64      | 584    | 3   | .4 | 1 | 26 | 885 | 910  | GGUUAGGAUA       | UGUCA AUGGA      | ge     | 1 |
| trf_6_4 | Bra000 | 11  |    |   |    |     |      | UCCGUUGUCGUCCAGC | UAACCGGAGGACGAUA | Cleava |   |
| 64      | 529    | 3   | .2 | 1 | 21 | 984 | 1004 | GGUUA            | AUGGA            | ge     | 1 |
| trf_6_4 | Bra013 | 16  |    |   |    |     |      | UCCGUUGUCGUCCAGC | AACCGAUGGAUGUCA  | Cleava |   |
| 65      | 584    | 3   | .4 | 1 | 20 | 891 | 910  | GGUU             | UGGA             | ge     | 1 |
| trf_6_4 | Bra000 | 11  |    |   |    |     |      | UCCGUUGUCGUCCAGC | AACCGGAGGACGAUAA | Cleava |   |
| 65      | 529    | 3   | .2 | 1 | 20 | 985 | 1004 | GGUU             | UGGA             | ge     | 1 |
| trf_6_4 | Bra013 | 16  |    |   |    |     |      | UCCGUUGUCGUCCAGC | UAACCGAUGGAUGUCA | Cleava |   |
| 66      | 584    | 3   | .4 | 1 | 21 | 890 | 910  | GGUUA            | AUGGA            | ge     | 1 |
| trf_6_4 | Bra000 | 11  |    |   |    |     |      | UCCGUUGUCGUCCAGC | UAACCGGAGGACGAUA | Cleava |   |
| 66      | 529    | 3   | .2 | 1 | 21 | 984 | 1004 | GGUUA            | AUGGA            | ge     | 1 |
| trf_6_4 | Bra013 | 16  |    |   |    |     |      | UCCGUUGUCGUCCAGC | UAACCGAUGGAUGUCA | Cleava |   |
| 67      | 584    | 3   | .4 | 1 | 21 | 890 | 910  | GGUUA            | AUGGA            | ge     | 1 |
| trf_6_4 | Bra000 | 11  |    |   |    |     |      | UCCGUUGUCGUCCAGC | UAACCGGAGGACGAUA | Cleava |   |
| 67      | 529    | 3   | .2 | 1 | 21 | 984 | 1004 | GGUUA            | AUGGA            | ge     | 1 |
| trf_6_4 | Bra007 | 14  |    |   |    |     |      | GCACCAGUGGUCUAGU | UACUACUGGACCUUUG | Cleava |   |
| 69      | 154    | 2.5 | .1 | 1 | 20 | 511 | 530  | GGUA             | GUGC             | ge     | 1 |
| trf_6_4 | Bra016 | 20  |    |   |    |     |      | UCCGUCGUAGUCUAGC | CUGAAGAAGCUAGGCU | Cleava |   |
| 73      | 601    | 3   | .8 | 1 | 24 | 415 | 438  | UGGUUAGG         | GCGACGGA         | ge     | 1 |
| trf_6_4 | Bra016 | 20  |    |   |    |     |      | UCCGUCGUAGUCUAGC | AAGAAGCUAGGCUGCG | Cleava |   |
| 74      | 601    | 3   | .8 | 1 | 21 | 418 | 438  | UGGUU            | ACGGA            | ge     | 1 |
| trf_6_4 | Bra016 | 20  |    |   |    |     |      | UCCGUCGUAGUCUAGC | CUGAAGAAGCUAGGCU | Cleava |   |
| 75      | 601    | 3   | .8 | 1 | 24 | 415 | 438  | UGGUUAGG         | GCGACGGA         | ge     | 1 |
| trf_6_4 | Bra016 | 20  |    |   |    |     |      | UCCGUCGUAGUCUAGC | CUGAAGAAGCUAGGCU | Cleava |   |
| 76      | 601    | 3   | .8 | 1 | 24 | 415 | 438  | UGGUUAGG         | GCGACGGA         | ge     | 1 |
| trf_6_4 | Bra024 | 7.  |    |   |    |     |      | GGGGAUGUAGCUCAAA | UCCAACAUUUCGGUUA | Cleava |   |
| 77      | 638    | 3   | 5  | 1 | 23 | 203 | 225  | UGGUAGA          | CAUCCCC          | ge     | 1 |
| trf_6_4 | Bra025 | 17  |    |   |    |     |      | GGGGAUGUAGCUCAAA | ACAAUUUGAGCUUCAU | Cleava |   |
| 77      | 904    | 3   | .2 | 1 | 20 | 344 | 363  | UGGU             | CUUC             | ge     | 1 |
| trf_6_4 | Bra033 | 24  |    |   |    |     |      | CCGACCUUAGCUCAGU | UCAACCAACGGAGUUG | Cleava |   |
| 78      | 406    | 3   | .4 | 1 | 23 | 30  | 52   | UGGUAGA          | GGGUUGG          | ge     | 1 |

|         |        |    |    |   |    |      |      |                  |                   |        |   |
|---------|--------|----|----|---|----|------|------|------------------|-------------------|--------|---|
| trf_6_4 | Bra033 | 24 |    |   |    |      |      | CCGACCUUAGCUCAGU | UCAACCAACGGAGUUG  | Cleava |   |
| 78      | 405    | 3  | .4 | 1 | 23 | 30   | 52   | UGGUAGA          | GGGUUGG           | ge     | 1 |
| trf_6_4 | Bra004 | 20 |    |   |    |      |      | CCGACCUUAGCUCAGU | GUUAACUGGGCUAAGG  | Cleava |   |
| 78      | 481    | 3  | .0 | 1 | 20 | 1660 | 1679 | UGGU             | UCGC              | ge     | 1 |
| trf_6_4 | Bra016 | 20 |    |   |    |      |      | UCCGUCGUAGUCUAGC | CUGAAGAAGCUAGGCU  | Cleava |   |
| 79      | 601    | 3  | .8 | 1 | 24 | 415  | 438  | UGGUUAGG         | GCGACGGA          | ge     | 1 |
| trf_6_4 | Bra016 | 20 |    |   |    |      |      | UCCGUCGUAGUCUAGC | CUGAAGAAGCUAGGCU  | Cleava |   |
| 80      | 601    | 3  | .8 | 1 | 24 | 415  | 438  | UGGUUAGG         | GCGACGGA          | ge     | 1 |
| trf_6_4 | Bra016 | 20 |    |   |    |      |      | UCCGUCGUAGUCUAGC | AAGAAGCUAGGCUGCG  | Cleava |   |
| 82      | 601    | 3  | .8 | 1 | 21 | 418  | 438  | UGGUU            | ACGGA             | ge     | 1 |
| trf_6_4 | Bra016 | 20 |    |   |    |      |      | UCCGUCGUAGUCUAGC | CUGAAGAAGCUAGGCU  | Cleava |   |
| 83      | 601    | 3  | .8 | 1 | 24 | 415  | 438  | UGGUUAGG         | GCGACGGA          | ge     | 1 |
| trf_6_4 | Bra016 | 9. |    |   |    |      |      | GUCGUUGUAGUAUAG  | UACUAUUUAUACUACAA | Cleava |   |
| 84      | 584    | 3  | 9  | 1 | 20 | 1045 | 1064 | UGGUA            | AGGC              | ge     | 1 |
| trf_6_4 | Bra035 | 10 |    |   |    |      |      | GUCGUUGUAGUAUAG  | UACCACAAUACUUCAA  | Cleava |   |
| 84      | 409    | 3  | .4 | 1 | 20 | 1328 | 1347 | UGGUA            | CGAG              | ge     | 1 |
| trf_6_4 | Bra016 | 9. |    |   |    |      |      | GUCGUUGUAGUAUAG  | UACUAUUUAUACUACAA | Cleava |   |
| 85      | 584    | 3  | 9  | 1 | 20 | 1045 | 1064 | UGGUA            | AGGC              | ge     | 1 |
| trf_6_4 | Bra035 | 10 |    |   |    |      |      | GUCGUUGUAGUAUAG  | UACCACAAUACUUCAA  | Cleava |   |
| 85      | 409    | 3  | .4 | 1 | 20 | 1328 | 1347 | UGGUA            | CGAG              | ge     | 1 |
| trf_6_4 | Bra016 | 9. |    |   |    |      |      | GUCGUUGUAGUAUAG  | UACUAUUUAUACUACAA | Cleava |   |
| 86      | 584    | 3  | 9  | 1 | 20 | 1045 | 1064 | UGGUA            | AGGC              | ge     | 1 |
| trf_6_4 | Bra035 | 10 |    |   |    |      |      | GUCGUUGUAGUAUAG  | UACCACAAUACUUCAA  | Cleava |   |
| 86      | 409    | 3  | .4 | 1 | 20 | 1328 | 1347 | UGGUA            | CGAG              | ge     | 1 |
| trf_6_4 | Bra016 | 9. |    |   |    |      |      | GUCGUUGUAGUAUAG  | UACUAUUUAUACUACAA | Cleava |   |
| 87      | 584    | 3  | 9  | 1 | 20 | 1045 | 1064 | UGGUA            | AGGC              | ge     | 1 |
| trf_6_4 | Bra035 | 10 |    |   |    |      |      | GUCGUUGUAGUAUAG  | UACCACAAUACUUCAA  | Cleava |   |
| 87      | 409    | 3  | .4 | 1 | 20 | 1328 | 1347 | UGGUA            | CGAG              | ge     | 1 |
| trf_6_4 | Bra003 | 23 |    |   |    |      |      | GCUGGAGUAGCUCAGU | CGAACCAACCGGGCUAC | Cleava |   |
| 96      | 602    | 3  | .1 | 1 | 23 | 271  | 293  | UGGUUAG          | UGCAGC            | ge     | 1 |
| trf_6_4 | Bra029 | 20 |    |   |    |      |      | GCUGGAGUAGCUCAGU | GGUCAGCUGAGCUACU  | Cleava |   |
| 96      | 975    | 3  | .8 | 1 | 21 | 1244 | 1264 | UGGUU            | CAAGC             | ge     | 1 |
| trf_6_4 | Bra003 | 16 |    |   |    |      |      | GCUGGAGUAGCUCAGU | CCUAACGGAGCUGCUC  | Cleava |   |
| 96      | 013    | 3  | .5 | 1 | 20 | 319  | 338  | UGGU             | CAGC              | ge     | 1 |



|         |        |     |    |   |    |      |      |                  |                   |        |   |
|---------|--------|-----|----|---|----|------|------|------------------|-------------------|--------|---|
| trf_6_5 | Bra007 | 14  |    |   |    |      |      | GCACCAGUGGUCUAGU | UACUACUGGACCUUUG  | Cleava |   |
| 00      | 154    | 2.5 | .1 | 1 | 20 | 511  | 530  | GGUA             | GUGC              | ge     | 1 |
| trf_6_5 | Bra016 | 9.  |    |   |    |      |      | GUCGUUGUAGUAUAG  | UACUAUUUAUACUACAA | Cleava |   |
| 01      | 584    | 3   | 9  | 1 | 20 | 1045 | 1064 | UGGUA            | AGGC              | ge     | 1 |
| trf_6_5 | Bra016 | 9.  |    |   |    |      |      | GUCGUUGUAGUAUAG  | UACUAUUUAUACUACAA | Cleava |   |
| 02      | 584    | 3   | 9  | 1 | 20 | 1045 | 1064 | UGGUA            | AGGC              | ge     | 1 |
| trf_6_5 | Bra035 | 10  |    |   |    |      |      | GUCGUUGUAGUAUAG  | UACCACAAUACUUCAA  | Cleava |   |
| 02      | 409    | 3   | .4 | 1 | 20 | 1328 | 1347 | UGGUA            | CGAG              | ge     | 1 |
| trf_6_5 | Bra016 | 9.  |    |   |    |      |      | GUCGUUGUAGUAUAG  | UACUAUUUAUACUACAA | Cleava |   |
| 03      | 584    | 3   | 9  | 1 | 20 | 1045 | 1064 | UGGUA            | AGGC              | ge     | 1 |
| trf_6_5 | Bra035 | 10  |    |   |    |      |      | GUCGUUGUAGUAUAG  | UACCACAAUACUUCAA  | Cleava |   |
| 03      | 409    | 3   | .4 | 1 | 20 | 1328 | 1347 | UGGUA            | CGAG              | ge     | 1 |
| trf_6_5 | Bra016 | 9.  |    |   |    |      |      | GUCGUUGUAGUAUAG  | UACUAUUUAUACUACAA | Cleava |   |
| 04      | 584    | 3   | 9  | 1 | 20 | 1045 | 1064 | UGGUA            | AGGC              | ge     | 1 |
| trf_6_5 | Bra035 | 10  |    |   |    |      |      | GUCGUUGUAGUAUAG  | UACCACAAUACUUCAA  | Cleava |   |
| 04      | 409    | 3   | .4 | 1 | 20 | 1328 | 1347 | UGGUA            | CGAG              | ge     | 1 |
| trf_6_5 | Bra016 | 9.  |    |   |    |      |      | GUCGUUGUAGUAUAG  | UACUAUUUAUACUACAA | Cleava |   |
| 05      | 584    | 3   | 9  | 1 | 20 | 1045 | 1064 | UGGUA            | AGGC              | ge     | 1 |
| trf_6_5 | Bra035 | 10  |    |   |    |      |      | GUCGUUGUAGUAUAG  | UACCACAAUACUUCAA  | Cleava |   |
| 05      | 409    | 3   | .4 | 1 | 20 | 1328 | 1347 | UGGUA            | CGAG              | ge     | 1 |
| trf_6_5 | Bra013 | 22  |    |   |    |      |      | UCCGUUGUAGUCUAGC | CAUCAUCAGCUUGGCU  | Cleava |   |
| 12      | 528    | 3   | .0 | 1 | 24 | 196  | 219  | UGGUCAGG         | AUAACGGG          | ge     | 1 |
| trf_6_5 | Bra000 | 15  |    |   |    |      |      | GGGUGUUUGGUCUAG  | UUACACCACCAGACCAG | Cleava |   |
| 23      | 791    | 2.5 | .9 | 1 | 23 | 954  | 976  | UGGUAUGA         | ACACCC            | ge     | 1 |
| trf_6_5 | Bra001 | 19  |    |   |    |      |      | GGGUGUUUGGUCUAG  | GAGCCUAUCACUGGAC  | Cleava |   |
| 23      | 870    | 2.5 | .8 | 1 | 25 | 814  | 838  | UGGUAUGAUU       | CAAACACUA         | ge     | 1 |
| trf_6_5 | Bra003 | 12  |    |   |    |      |      | GGGUGUUUGGUCUAG  | AGCCUUAUCACUUGAC  | Cleava |   |
| 23      | 793    | 3   | .4 | 1 | 25 | 516  | 540  | UGGUAUGAUU       | CAAGCAUCU         | ge     | 1 |
| trf_6_5 | Bra024 | 7.  |    |   |    |      |      | GGGGAUGUAGCUCAAA | UCCAACAUUUCGGUUA  | Cleava |   |
| 24      | 638    | 3   | 5  | 1 | 23 | 203  | 225  | UGGUAGA          | CAUCCCC           | ge     | 1 |
| trf_6_5 | Bra025 | 17  |    |   |    |      |      | GGGGAUGUAGCUCAAA | ACAAUUUGAGCUUCAU  | Cleava |   |
| 24      | 904    | 3   | .2 | 1 | 20 | 344  | 363  | UGGU             | CUUC              | ge     | 1 |
| trf_6_5 | Bra013 | 22  |    |   |    |      |      | UCCGUUGUAGUCUAGC | CAUCAUCAGCUUGGCU  | Cleava |   |
| 27      | 528    | 3   | .0 | 1 | 24 | 196  | 219  | UGGUCAGG         | AUAACGGG          | ge     | 1 |

|         |        |     |    |   |    |      |      |                  |                   |        |   |
|---------|--------|-----|----|---|----|------|------|------------------|-------------------|--------|---|
| trf_6_5 | Bra007 | 14  |    |   |    |      |      | GCACCAGUGGUCUAGU | UACUACUGGACCUUUG  | Cleava |   |
| 34      | 154    | 2.5 | .1 | 1 | 20 | 511  | 530  | GGUA             | GUGC              | ge     | 1 |
| trf_6_5 | Bra016 | 9.  |    |   |    |      |      | GUCGUUGUAGUAUAG  | UACUAUUUAUACUACAA | Cleava |   |
| 36      | 584    | 3   | 9  | 1 | 20 | 1045 | 1064 | UGGUA            | AGGC              | ge     | 1 |
| trf_6_5 | Bra035 | 10  |    |   |    |      |      | GUCGUUGUAGUAUAG  | UACCACAAUACUUCAA  | Cleava |   |
| 36      | 409    | 3   | .4 | 1 | 20 | 1328 | 1347 | UGGUA            | CGAG              | ge     | 1 |
| trf_6_5 | Bra016 | 9.  |    |   |    |      |      | GUCGUUGUAGUAUAG  | UACUAUUUAUACUACAA | Cleava |   |
| 37      | 584    | 3   | 9  | 1 | 20 | 1045 | 1064 | UGGUA            | AGGC              | ge     | 1 |
| trf_6_5 | Bra035 | 10  |    |   |    |      |      | GUCGUUGUAGUAUAG  | UACCACAAUACUUCAA  | Cleava |   |
| 37      | 409    | 3   | .4 | 1 | 20 | 1328 | 1347 | UGGUA            | CGAG              | ge     | 1 |
| trf_6_5 | Bra016 | 9.  |    |   |    |      |      | GUCGUUGUAGUAUAG  | UACUAUUUAUACUACAA | Cleava |   |
| 38      | 584    | 3   | 9  | 1 | 20 | 1045 | 1064 | UGGUA            | AGGC              | ge     | 1 |
| trf_6_5 | Bra035 | 10  |    |   |    |      |      | GUCGUUGUAGUAUAG  | UACCACAAUACUUCAA  | Cleava |   |
| 38      | 409    | 3   | .4 | 1 | 20 | 1328 | 1347 | UGGUA            | CGAG              | ge     | 1 |
| trf_6_5 | Bra002 | 15  |    |   |    |      |      | GGGGUUCGAAUCUCAG | CAUGGUCUGAGAUUCA  | Cleava |   |
| 39      | 904    | 3   | .6 | 1 | 22 | 1319 | 1340 | ACUAUG           | AACCUU            | ge     | 1 |
|         | Bra033 | 21  |    |   |    |      |      | GGGGAUGUAGCUCAAA | ACCCUUUGGGUAACAU  | Transl |   |
| trf_6_4 | 370    | 3   | .6 | 1 | 20 | 4750 | 4769 | UGGU             | CCCC              | ation  | 1 |
|         | Bra033 | 21  |    |   |    |      |      | GGGGAUGUAGCUCAAA | CUGGACCCUUUGGGUA  | Transl |   |
| trf_6_5 | 370    | 3   | .6 | 1 | 24 | 4746 | 4769 | UGGUAGAG         | ACAUCCCC          | ation  | 1 |
|         | Bra033 | 21  |    |   |    |      |      | GGGGAUGUAGCUCAAA | ACCCUUUGGGUAACAU  | Transl |   |
| trf_6_7 | 370    | 3   | .6 | 1 | 20 | 4750 | 4769 | UGGU             | CCCC              | ation  | 1 |
| trf_6_1 | Bra037 | 22  |    |   |    |      |      | UCCGUUAUCGUCCAGC | GUUGAAACCGCUGUCU  | Transl |   |
| 1       | 748    | 2.5 | .8 | 1 | 25 | 561  | 585  | GGUUAGGAU        | GAUAACGGA         | ation  | 1 |
| trf_6_1 | Bra037 | 22  |    |   |    |      |      | UCCGUUAUCGUCCAGC | GUUGAAACCGCUGUCU  | Transl |   |
| 2       | 748    | 2.5 | .8 | 1 | 25 | 561  | 585  | GGUUAGGAU        | GAUAACGGA         | ation  | 1 |
| trf_6_1 | Bra037 | 22  |    |   |    |      |      | UCCGUUAUCGUCCAGC | AACCGCUGUCUGAUAA  | Transl |   |
| 3       | 748    | 2.5 | .8 | 1 | 20 | 566  | 585  | GGUU             | CGGA              | ation  | 1 |
| trf_6_1 | Bra037 | 22  |    |   |    |      |      | UCCGUUAUCGUCCAGC | GUUGAAACCGCUGUCU  | Transl |   |
| 4       | 748    | 2.5 | .8 | 1 | 25 | 561  | 585  | GGUUAGGAU        | GAUAACGGA         | ation  | 1 |
| trf_6_1 | Bra037 | 14  |    |   |    |      |      | UCCGUUGUAGUCUAGC | UGACUGGUUAGGCCAC  | Transl |   |
| 5       | 499    | 3   | .7 | 1 | 22 | 174  | 195  | UGGUUA           | AACGGA            | ation  | 1 |
| trf_6_1 | Bra033 | 21  |    |   |    |      |      | GGGGAUGUAGCUCAAA | ACCCUUUGGGUAACAU  | Transl |   |
| 6       | 370    | 3   | .6 | 1 | 20 | 4750 | 4769 | UGGU             | CCCC              | ation  | 1 |

|         |        |     |    |   |    |      |      |                  |                   |        |   |
|---------|--------|-----|----|---|----|------|------|------------------|-------------------|--------|---|
| trf_6_1 | Bra033 | 21  |    |   |    |      |      | GGGGAUGUAGCUCAAA | ACCCUUUGGGUAACAU  | Transl |   |
| 7       | 370    | 3   | .6 | 1 | 20 | 4750 | 4769 | UGGU             | CCCC              | ation  | 1 |
| trf_6_3 | Bra033 | 21  |    |   |    |      |      | GGGGAUGUAGCUCAAA | ACCCUUUGGGUAACAU  | Transl |   |
| 4       | 370    | 3   | .6 | 1 | 20 | 4750 | 4769 | UGGU             | CCCC              | ation  | 1 |
| trf_6_4 | Bra037 | 14  |    |   |    |      |      | UCCGUUGUAGUCUAGC | UGACUGGUUAGGCCAC  | Transl |   |
| 4       | 499    | 3   | .7 | 1 | 22 | 174  | 195  | UGGUCA           | AACGGA            | ation  | 1 |
| trf_6_7 | Bra015 | 24  |    |   |    |      |      | AUCAGAGUGGCGCAGC | CUCCGUUUCACUGCA   | Transl |   |
| 1       | 824    | 3   | .0 | 1 | 26 | 913  | 938  | GGAAGCGUGG       | CCACUCUGAC        | ation  | 1 |
|         |        |     |    |   |    |      |      |                  | CACG-             |        |   |
| trf_6_7 | Bra033 | 18  |    |   |    |      |      | AUCAGAGUGGCGCAGC | UUACGUUGCACCACUU  | Transl |   |
| 1       | 352    | 3   | .3 | 1 | 25 | 586  | 609  | GGAAGCGUG        | UGAU              | ation  | 1 |
| trf_6_8 | Bra003 | 7.  |    |   |    |      |      | GUGGCUGUAGUUUAG  | UACCAUUA-         | Transl |   |
| 2       | 191    | 2.5 | 6  | 1 | 20 | 27   | 45   | UGGUA            | CUACAGCCAC        | ation  | 1 |
| trf_6_8 | Bra033 | 21  |    |   |    |      |      | GGGGAUGUAGCUCAAA | ACCCUUUGGGUAACAU  | Transl |   |
| 5       | 370    | 3   | .6 | 1 | 20 | 4750 | 4769 | UGGU             | CCCC              | ation  | 1 |
| trf_6_8 | Bra033 | 21  |    |   |    |      |      | GGGGAUGUAGCUCAAA | ACCCUUUGGGUAACAU  | Transl |   |
| 6       | 370    | 3   | .6 | 1 | 20 | 4750 | 4769 | UGGU             | CCCC              | ation  | 1 |
| trf_6_9 | Bra037 | 14  |    |   |    |      |      | UCCGUUGUAGUCUAGC | UGACUGGUUAGGCCAC  | Transl |   |
| 9       | 499    | 3   | .7 | 1 | 22 | 174  | 195  | UGGUCA           | AACGGA            | ation  | 1 |
| trf_6_1 | Bra037 | 14  |    |   |    |      |      | UCCGUUGUAGUCUAGC | UGACUGGUUAGGCCAC  | Transl |   |
| 00      | 499    | 3   | .7 | 1 | 22 | 174  | 195  | UGGUCA           | AACGGA            | ation  | 1 |
| trf_6_1 | Bra037 | 14  |    |   |    |      |      | UCCGUUGUAGUCUAGC | UGACUGGUUAGGCCAC  | Transl |   |
| 04      | 499    | 3   | .7 | 1 | 22 | 174  | 195  | UGGUCA           | AACGGA            | ation  | 1 |
| trf_6_1 | Bra001 | 15  |    |   |    |      |      | GGGUGUUUGGUCUAG  | GUACCACUAGACGAU   | Transl |   |
| 07      | 210    | 3   | .7 | 1 | 21 | 2173 | 2193 | UGGUUAU          | CACCU             | ation  | 1 |
| trf_6_1 | Bra020 | 15  |    |   |    |      |      | UCCGUUGUCGUCCAGC | CCAACUGCUGGAAGAC  | Transl |   |
| 11      | 153    | 2.5 | .4 | 1 | 22 | 1953 | 1974 | GGUUAG           | AAUGGG            | ation  | 1 |
| trf_6_1 | Bra012 | 18  |    |   |    |      |      | UCCGUUGUCGUCCAGC | AAUCGCUGAACCACAAC | Transl |   |
| 11      | 143    | 2.5 | .5 | 1 | 20 | 392  | 411  | GGUU             | GGA               | ation  | 1 |
| trf_6_1 | Bra037 | 22  |    |   |    |      |      | UCCGUUGUCGUCCAGC | GUUGAAACCGCUGUCU  | Transl |   |
| 11      | 748    | 3   | .8 | 1 | 25 | 561  | 585  | GGUUAGGAU        | GAUAACGGA         | ation  | 1 |
| trf_6_1 | Bra020 | 15  |    |   |    |      |      | UCCGUUGUCGUCCAGC | AACUGCUGGAAGACAA  | Transl |   |
| 12      | 153    | 2.5 | .4 | 1 | 20 | 1955 | 1974 | GGUU             | UGGG              | ation  | 1 |
| trf_6_1 | Bra012 | 2.5 | 18 | 1 | 20 | 392  | 411  | UCCGUUGUCGUCCAGC | AAUCGCUGAACCACAAC | Transl | 1 |

|         |        |        |   |    |      |      |  |                  |                   |        |   |
|---------|--------|--------|---|----|------|------|--|------------------|-------------------|--------|---|
| 12      | 143    | .5     |   |    |      |      |  | GGUU             | GGA               | ation  |   |
| trf_6_1 | Bra037 | 22     |   |    |      |      |  | UCCGUUGUCGUCCAGC | AACCGCUGUCUGAUAA  | Transl |   |
| 12      | 748    | 3 .8   | 1 | 20 | 566  | 585  |  | GGUU             | CGGA              | ation  | 1 |
| trf_6_1 | Bra020 | 15     |   |    |      |      |  | UCCGUUGUCGUCCAGC | CCAACUGCUGGAAGAC  | Transl |   |
| 13      | 153    | 2.5 .4 | 1 | 22 | 1953 | 1974 |  | GGUUAG           | AAUGGG            | ation  | 1 |
| trf_6_1 | Bra012 | 18     |   |    |      |      |  | UCCGUUGUCGUCCAGC | AAUCGCUGAACCACAAC | Transl |   |
| 13      | 143    | 2.5 .5 | 1 | 20 | 392  | 411  |  | GGUU             | GGA               | ation  | 1 |
| trf_6_1 | Bra037 | 22     |   |    |      |      |  | UCCGUUGUCGUCCAGC | AACCGCUGUCUGAUAA  | Transl |   |
| 13      | 748    | 3 .8   | 1 | 20 | 566  | 585  |  | GGUU             | CGGA              | ation  | 1 |
| trf_6_1 | Bra020 | 15     |   |    |      |      |  | NCCGUUGUCGUCCAGC | CCAACUGCUGGAAGAC  | Transl |   |
| 14      | 153    | 3 .4   | 1 | 22 | 1953 | 1974 |  | GGUUAG           | AAUGGG            | ation  | 1 |
| trf_6_1 | Bra020 | 15     |   |    |      |      |  | UCCGUUGUCGUCCAGC | CCAACUGCUGGAAGAC  | Transl |   |
| 16      | 153    | 2.5 .4 | 1 | 22 | 1953 | 1974 |  | GGUUAG           | AAUGGG            | ation  | 1 |
| trf_6_1 | Bra012 | 18     |   |    |      |      |  | UCCGUUGUCGUCCAGC | AAUCGCUGAACCACAAC | Transl |   |
| 16      | 143    | 2.5 .5 | 1 | 20 | 392  | 411  |  | GGUU             | GGA               | ation  | 1 |
| trf_6_1 | Bra037 | 22     |   |    |      |      |  | UCCGUUGUCGUCCAGC | AACCGCUGUCUGAUAA  | Transl |   |
| 16      | 748    | 3 .8   | 1 | 20 | 566  | 585  |  | GGUU             | CGGA              | ation  | 1 |
| trf_6_1 | Bra020 | 15     |   |    |      |      |  | UCCGUUGUCGUCCAGC | CCAACUGCUGGAAGAC  | Transl |   |
| 17      | 153    | 2.5 .4 | 1 | 22 | 1953 | 1974 |  | GGUUAG           | AAUGGG            | ation  | 1 |
| trf_6_1 | Bra012 | 18     |   |    |      |      |  | UCCGUUGUCGUCCAGC | AAUCGCUGAACCACAAC | Transl |   |
| 17      | 143    | 2.5 .5 | 1 | 20 | 392  | 411  |  | GGUU             | GGA               | ation  | 1 |
| trf_6_1 | Bra037 | 22     |   |    |      |      |  | UCCGUUGUCGUCCAGC | GUUGAAACCGCUGUCU  | Transl |   |
| 17      | 748    | 3 .8   | 1 | 25 | 561  | 585  |  | GGUUAGGAU        | GAUAAACGGA        | ation  | 1 |
| trf_6_1 | Bra020 | 15     |   |    |      |      |  | UCCGUUGUCGUCCAGC | CCAACUGCUGGAAGAC  | Transl |   |
| 18      | 153    | 2.5 .4 | 1 | 22 | 1953 | 1974 |  | GGUUAG           | AAUGGG            | ation  | 1 |
| trf_6_1 | Bra012 | 18     |   |    |      |      |  | UCCGUUGUCGUCCAGC | AAUCGCUGAACCACAAC | Transl |   |
| 18      | 143    | 2.5 .5 | 1 | 20 | 392  | 411  |  | GGUU             | GGA               | ation  | 1 |
| trf_6_1 | Bra037 | 22     |   |    |      |      |  | UCCGUUGUCGUCCAGC | GUUGAAACCGCUGUCU  | Transl |   |
| 18      | 748    | 3 .8   | 1 | 25 | 561  | 585  |  | GGUUAGGAU        | GAUAAACGGA        | ation  | 1 |
| trf_6_1 | Bra033 | 21     |   |    |      |      |  | GGGGAUGUAGCUCAAA | ACCCUUUGGGUAACAU  | Transl |   |
| 43      | 370    | 3 .6   | 1 | 20 | 4750 | 4769 |  | UGGU             | CCCC              | ation  | 1 |
| trf_6_1 | Bra033 | 21     |   |    |      |      |  | GGGGAUGUAGCUCAAA | ACCCUUUGGGUAACAU  | Transl |   |
| 45      | 370    | 3 .6   | 1 | 20 | 4750 | 4769 |  | UGGU             | CCCC              | ation  | 1 |
| trf_6_1 | Bra037 | 3 12   | 1 | 22 | 478  | 499  |  | GACGGUUUGGCCGAGU | UUGACUACUCGUCCAA  | Transl | 1 |

|         |        |     |    |   |    |      |      |                  |                   |        |   |
|---------|--------|-----|----|---|----|------|------|------------------|-------------------|--------|---|
| 52      | 152    |     | .2 |   |    |      |      | GGUCUA           | ACCCUC            | ation  |   |
| trf_6_1 | Bra018 |     | 7. |   |    |      |      | GACGGUUUGGCCGAGU | CCCAAGACCACUCCUCG | Transl |   |
| 52      | 257    | 3   | 1  | 1 | 25 | 27   | 51   | GGUCUAAGG        | AAACCGUC          | ation  | 1 |
| trf_6_1 | Bra015 |     | 24 |   |    |      |      | AUCAGAGUGGCGCAGC | CUCCGUUCCACUGCA   | Transl |   |
| 53      | 824    | 3   | .0 | 1 | 26 | 913  | 938  | GGAAGCGUGG       | CCACUCUGAC        | ation  | 1 |
|         |        |     |    |   |    |      |      | CACG-            |                   |        |   |
| trf_6_1 | Bra033 |     | 18 |   |    |      |      | AUCAGAGUGGCGCAGC | UUACGUUGCACCACUU  | Transl |   |
| 53      | 352    | 3   | .3 | 1 | 25 | 586  | 609  | GGAAGCGUG        | UGAU              | ation  | 1 |
| trf_6_1 | Bra037 |     | 14 |   |    |      |      | UCCGUUGUAGUCUAGC | UGACUGGUUAGGCCAC  | Transl |   |
| 57      | 499    | 3   | .7 | 1 | 22 | 174  | 195  | UGGUCA           | AACGGA            | ation  | 1 |
| trf_6_1 | Bra033 |     | 21 |   |    |      |      | GGGGAUGUAGCUCAAA | ACCCUUUGGGUAACAU  | Transl |   |
| 59      | 370    | 3   | .6 | 1 | 20 | 4750 | 4769 | UGGU             | CCCC              | ation  | 1 |
| trf_6_1 | Bra033 |     | 21 |   |    |      |      | GGGGAUGUAGCUCAAA | ACCCUUUGGGUAACAU  | Transl |   |
| 60      | 370    | 3   | .6 | 1 | 20 | 4750 | 4769 | UGGU             | CCCC              | ation  | 1 |
| trf_6_1 | Bra037 |     | 14 |   |    |      |      | UCCGUUGUAGUCUAGC | UGACUGGUUAGGCCAC  | Transl |   |
| 70      | 499    | 3   | .7 | 1 | 22 | 174  | 195  | UGGUCA           | AACGGA            | ation  | 1 |
| trf_6_1 | Bra015 |     | 24 |   |    |      |      | AUCAGAGUGGCGCAGC | CUCCGUUCCACUGCA   | Transl |   |
| 76      | 824    | 3   | .0 | 1 | 26 | 913  | 938  | GGAAGCGUGG       | CCACUCUGAC        | ation  | 1 |
|         |        |     |    |   |    |      |      | CACG-            |                   |        |   |
| trf_6_1 | Bra033 |     | 18 |   |    |      |      | AUCAGAGUGGCGCAGC | UUACGUUGCACCACUU  | Transl |   |
| 76      | 352    | 3   | .3 | 1 | 25 | 586  | 609  | GGAAGCGUG        | UGAU              | ation  | 1 |
| trf_6_1 | Bra036 |     | 13 |   |    |      |      | GUGGCUGUAGUUUAG  | CAACACUAAAAGUGCAG | Transl |   |
| 85      | 328    | 3   | .8 | 1 | 20 | 708  | 727  | UGGUG            | CUAC              | ation  | 1 |
| trf_6_1 | Bra027 |     | 22 |   |    |      |      | GCCGACUUAGCUCAGU | UACCACAGGGCGAAGU  | Transl |   |
| 98      | 297    | 3   | .9 | 1 | 20 | 178  | 197  | GGUA             | UGGC              | ation  | 1 |
| trf_6_1 | Bra037 |     | 14 |   |    |      |      | UCCGUUGUAGUCUAGC | UGACUGGUUAGGCCAC  | Transl |   |
| 99      | 499    | 3   | .7 | 1 | 22 | 174  | 195  | UGGUCA           | AACGGA            | ation  | 1 |
| trf_6_2 | Bra037 |     | 14 |   |    |      |      | UCCGUUGUAGUCUAGC | UGACUGGUUAGGCCAC  | Transl |   |
| 30      | 499    | 3   | .7 | 1 | 22 | 174  | 195  | UGGUCA           | AACGGA            | ation  | 1 |
| trf_6_2 | Bra037 |     | 22 |   |    |      |      | UCCGUUAUCGUCCAGC | GUUGAAACCGCUGUCU  | Transl |   |
| 45      | 748    | 2.5 | .8 | 1 | 25 | 561  | 585  | GGUUAGGAU        | GAUAACGGA         | ation  | 1 |
| trf_6_2 | Bra037 |     | 22 |   |    |      |      | UCCGUUAUCGUCCAGC | AACCGCUGUCUGAUAA  | Transl |   |
| 46      | 748    | 2.5 | .8 | 1 | 20 | 566  | 585  | GGUU             | CGGA              | ation  | 1 |
| trf_6_2 | Bra037 | 2.5 | 22 | 1 | 25 | 561  | 585  | UCCGUUAUCGUCCAGC | GUUGAAACCGCUGUCU  | Transl | 1 |

|         |        |     |    |   |    |      |      |                   |                   |        |   |
|---------|--------|-----|----|---|----|------|------|-------------------|-------------------|--------|---|
| 47      | 748    |     | .8 |   |    |      |      | GGUUAGGAU         | GAUAACGGA         | ation  |   |
| trf_6_2 | Bra037 |     | 22 |   |    |      |      | UCCGUUAUCCGUCCAGC | GUUGAAACCGCUGUCU  | Transl |   |
| 48      | 748    | 2.5 | .8 | 1 | 25 | 561  | 585  | GGUUAGGAU         | GAUAACGGA         | ation  | 1 |
| trf_6_2 | Bra015 |     | 24 |   |    |      |      | AUCAGAGUGGCGCAGC  | CUCCGUUCCACUGCA   | Transl |   |
| 69      | 824    | 3   | .0 | 1 | 26 | 913  | 938  | GGAAGCGUGG        | CCACUCUGAC        | ation  | 1 |
|         |        |     |    |   |    |      |      |                   | CACG-             |        |   |
| trf_6_2 | Bra033 |     | 18 |   |    |      |      | AUCAGAGUGGCGCAGC  | UUACGUUGCACCACUU  | Transl |   |
| 69      | 352    | 3   | .3 | 1 | 25 | 586  | 609  | GGAAGCGUG         | UGAU              | ation  | 1 |
| trf_6_2 | Bra015 |     | 24 |   |    |      |      | AUCAGAGUGGCGCAGC  | CUCCGUUCCACUGCA   | Transl |   |
| 83      | 824    | 3   | .0 | 1 | 26 | 913  | 938  | GGAAGCGUGG        | CCACUCUGAC        | ation  | 1 |
|         |        |     |    |   |    |      |      |                   | CACG-             |        |   |
| trf_6_2 | Bra033 |     | 18 |   |    |      |      | AUCAGAGUGGCGCAGC  | UUACGUUGCACCACUU  | Transl |   |
| 83      | 352    | 3   | .3 | 1 | 25 | 586  | 609  | GGAAGCGUG         | UGAU              | ation  | 1 |
| trf_6_2 | Bra020 |     | 15 |   |    |      |      | UCCGUUGUCGUCCAGC  | CCAACUGCUGGAAGAC  | Transl |   |
| 84      | 153    | 2.5 | .4 | 1 | 22 | 1953 | 1974 | GGUUAG            | AAUGGG            | ation  | 1 |
| trf_6_2 | Bra012 |     | 18 |   |    |      |      | UCCGUUGUCGUCCAGC  | AAUCGCUGAACCACAAC | Transl |   |
| 84      | 143    | 2.5 | .5 | 1 | 20 | 392  | 411  | GGUU              | GGA               | ation  | 1 |
| trf_6_2 | Bra037 |     | 22 |   |    |      |      | UCCGUUGUCGUCCAGC  | GUUGAAACCGCUGUCU  | Transl |   |
| 84      | 748    | 3   | .8 | 1 | 25 | 561  | 585  | GGUUAGGAU         | GAUAACGGA         | ation  | 1 |
| trf_6_2 | Bra020 |     | 15 |   |    |      |      | UCCGUUGUCGUCCAGC  | AACUGCUGGAAGACAA  | Transl |   |
| 85      | 153    | 2.5 | .4 | 1 | 20 | 1955 | 1974 | GGUU              | UGGG              | ation  | 1 |
| trf_6_2 | Bra012 |     | 18 |   |    |      |      | UCCGUUGUCGUCCAGC  | AAUCGCUGAACCACAAC | Transl |   |
| 85      | 143    | 2.5 | .5 | 1 | 20 | 392  | 411  | GGUU              | GGA               | ation  | 1 |
| trf_6_2 | Bra037 |     | 22 |   |    |      |      | UCCGUUGUCGUCCAGC  | AACCGCUGUCUGAUAA  | Transl |   |
| 85      | 748    | 3   | .8 | 1 | 20 | 566  | 585  | GGUU              | CGGA              | ation  | 1 |
| trf_6_2 | Bra020 |     | 15 |   |    |      |      | UCCGUUGUCGUCCAGC  | CCAACUGCUGGAAGAC  | Transl |   |
| 86      | 153    | 2.5 | .4 | 1 | 22 | 1953 | 1974 | GGUUAG            | AAUGGG            | ation  | 1 |
| trf_6_2 | Bra012 |     | 18 |   |    |      |      | UCCGUUGUCGUCCAGC  | AAUCGCUGAACCACAAC | Transl |   |
| 86      | 143    | 2.5 | .5 | 1 | 20 | 392  | 411  | GGUU              | GGA               | ation  | 1 |
| trf_6_2 | Bra037 |     | 22 |   |    |      |      | UCCGUUGUCGUCCAGC  | AACCGCUGUCUGAUAA  | Transl |   |
| 86      | 748    | 3   | .8 | 1 | 20 | 566  | 585  | GGUU              | CGGA              | ation  | 1 |
| trf_6_2 | Bra020 |     | 15 |   |    |      |      | UCCGUUGUCGUCCAGC  | CCAACUGCUGGAAGAC  | Transl |   |
| 87      | 153    | 2.5 | .4 | 1 | 22 | 1953 | 1974 | GGUUAG            | AAUGGG            | ation  | 1 |
| trf_6_2 | Bra012 | 2.5 | 18 | 1 | 20 | 392  | 411  | UCCGUUGUCGUCCAGC  | AAUCGCUGAACCACAAC | Transl | 1 |

|         |        |     |    |   |    |      |      |                  |                   |        |   |
|---------|--------|-----|----|---|----|------|------|------------------|-------------------|--------|---|
| 87      | 143    |     | .5 |   |    |      |      | GGUU             | GGA               | ation  |   |
| trf_6_2 | Bra037 |     | 22 |   |    |      |      | UCCGUUGUCGUCCAGC | GUUGAAACCGCUGUCU  | Transl |   |
| 87      | 748    | 3   | .8 | 1 | 25 | 561  | 585  | GGUUAGGAU        | GAUAACGGA         | ation  | 1 |
| trf_6_2 | Bra020 |     | 15 |   |    |      |      | UCCGUUGUCGUCCAGC | CCAACUGCUGGAAGAC  | Transl |   |
| 88      | 153    | 2.5 | .4 | 1 | 22 | 1953 | 1974 | GGUUAG           | AAUGGG            | ation  | 1 |
| trf_6_2 | Bra012 |     | 18 |   |    |      |      | UCCGUUGUCGUCCAGC | AAUCGCUGAACCACAAC | Transl |   |
| 88      | 143    | 2.5 | .5 | 1 | 20 | 392  | 411  | GGUU             | GGA               | ation  | 1 |
| trf_6_2 | Bra037 |     | 22 |   |    |      |      | UCCGUUGUCGUCCAGC | GUUGAAACCGCUGUCU  | Transl |   |
| 88      | 748    | 3   | .8 | 1 | 25 | 561  | 585  | GGUUAGGAU        | GAUAACGGA         | ation  | 1 |
| trf_6_2 | Bra015 |     | 24 |   |    |      |      | AUCAGAGUGGCGCAGC | CUCCGUUUCACUGCA   | Transl |   |
| 98      | 824    | 3   | .0 | 1 | 26 | 913  | 938  | GGAAGCGUGG       | CCACUCUGAC        | ation  | 1 |
|         |        |     |    |   |    |      |      | CACG-            |                   |        |   |
| trf_6_2 | Bra033 |     | 18 |   |    |      |      | AUCAGAGUGGCGCAGC | UUACGUUGCACCACUU  | Transl |   |
| 98      | 352    | 3   | .3 | 1 | 25 | 586  | 609  | GGAAGCGUG        | UGAU              | ation  | 1 |
| trf_6_3 | Bra037 |     | 14 |   |    |      |      | UCCGUUGUAGUCUAGC | UGACUGGUUAGGCCAC  | Transl |   |
| 05      | 499    | 3   | .7 | 1 | 22 | 174  | 195  | UGGUCA           | AACGGA            | ation  | 1 |
| trf_6_3 | Bra020 |     | 15 |   |    |      |      | UCCGUUGUCGUCCAGC | CCAACUGCUGGAAGAC  | Transl |   |
| 13      | 153    | 2.5 | .4 | 1 | 22 | 1953 | 1974 | GGUUAG           | AAUGGG            | ation  | 1 |
| trf_6_3 | Bra012 |     | 18 |   |    |      |      | UCCGUUGUCGUCCAGC | AAUCGCUGAACCACAAC | Transl |   |
| 13      | 143    | 2.5 | .5 | 1 | 20 | 392  | 411  | GGUU             | GGA               | ation  | 1 |
| trf_6_3 | Bra037 |     | 22 |   |    |      |      | UCCGUUGUCGUCCAGC | AACCGCUGUCUGAUAA  | Transl |   |
| 13      | 748    | 3   | .8 | 1 | 20 | 566  | 585  | GGUU             | CGGA              | ation  | 1 |
| trf_6_3 | Bra020 |     | 15 |   |    |      |      | UCCGUUGUCGUCCAGC | CCAACUGCUGGAAGAC  | Transl |   |
| 14      | 153    | 2.5 | .4 | 1 | 22 | 1953 | 1974 | GGUUAG           | AAUGGG            | ation  | 1 |
| trf_6_3 | Bra012 |     | 18 |   |    |      |      | UCCGUUGUCGUCCAGC | AAUCGCUGAACCACAAC | Transl |   |
| 14      | 143    | 2.5 | .5 | 1 | 20 | 392  | 411  | GGUU             | GGA               | ation  | 1 |
| trf_6_3 | Bra037 |     | 22 |   |    |      |      | UCCGUUGUCGUCCAGC | GUUGAAACCGCUGUCU  | Transl |   |
| 14      | 748    | 3   | .8 | 1 | 25 | 561  | 585  | GGUUAGGAU        | GAUAACGGA         | ation  | 1 |
| trf_6_3 | Bra020 |     | 15 |   |    |      |      | UCCGUUGUCGUCCAGC | CCAACUGCUGGAAGAC  | Transl |   |
| 15      | 153    | 2.5 | .4 | 1 | 22 | 1953 | 1974 | GGUUAG           | AAUGGG            | ation  | 1 |
| trf_6_3 | Bra012 |     | 18 |   |    |      |      | UCCGUUGUCGUCCAGC | AAUCGCUGAACCACAAC | Transl |   |
| 15      | 143    | 2.5 | .5 | 1 | 20 | 392  | 411  | GGUU             | GGA               | ation  | 1 |
| trf_6_3 | Bra037 |     | 22 |   |    |      |      | UCCGUUGUCGUCCAGC | AACCGCUGUCUGAUAA  | Transl |   |
| 15      | 748    | 3   | .8 | 1 | 20 | 566  | 585  | GGUU             | CGGA              | ation  | 1 |

|         |        |     |    |   |    |      |      |                  |                   |        |   |
|---------|--------|-----|----|---|----|------|------|------------------|-------------------|--------|---|
| trf_6_3 | Bra020 | 15  |    |   |    |      |      | UCCGUUGUCGUCCAGC | CCAACUGCUGGAAGAC  | Transl |   |
| 16      | 153    | 2.5 | .4 | 1 | 22 | 1953 | 1974 | GGUUAG           | AAUGGG            | ation  | 1 |
| trf_6_3 | Bra012 | 18  |    |   |    |      |      | UCCGUUGUCGUCCAGC | AAUCGCUGAACCACAAC | Transl |   |
| 16      | 143    | 2.5 | .5 | 1 | 20 | 392  | 411  | GGUU             | GGA               | ation  | 1 |
| trf_6_3 | Bra037 | 22  |    |   |    |      |      | UCCGUUGUCGUCCAGC | GUUGAAACCGCUGUCU  | Transl |   |
| 16      | 748    | 3   | .8 | 1 | 25 | 561  | 585  | GGUUAGGAU        | GAUAACGGA         | ation  | 1 |
| trf_6_3 | Bra020 | 15  |    |   |    |      |      | UCCGUUGUCGUCCAGC | CCAACUGCUGGAAGAC  | Transl |   |
| 17      | 153    | 2.5 | .4 | 1 | 22 | 1953 | 1974 | GGUUAG           | AAUGGG            | ation  | 1 |
| trf_6_3 | Bra012 | 18  |    |   |    |      |      | UCCGUUGUCGUCCAGC | AAUCGCUGAACCACAAC | Transl |   |
| 17      | 143    | 2.5 | .5 | 1 | 20 | 392  | 411  | GGUU             | GGA               | ation  | 1 |
| trf_6_3 | Bra037 | 22  |    |   |    |      |      | UCCGUUGUCGUCCAGC | AACCGCUGUCUGAUAA  | Transl |   |
| 17      | 748    | 3   | .8 | 1 | 20 | 566  | 585  | GGUU             | CGGA              | ation  | 1 |
| trf_6_3 | Bra020 | 15  |    |   |    |      |      | UCCGUUGUCGUCCAGC | CCAACUGCUGGAAGAC  | Transl |   |
| 18      | 153    | 2.5 | .4 | 1 | 22 | 1953 | 1974 | GGUUAG           | AAUGGG            | ation  | 1 |
| trf_6_3 | Bra012 | 18  |    |   |    |      |      | UCCGUUGUCGUCCAGC | AAUCGCUGAACCACAAC | Transl |   |
| 18      | 143    | 2.5 | .5 | 1 | 20 | 392  | 411  | GGUU             | GGA               | ation  | 1 |
| trf_6_3 | Bra037 | 22  |    |   |    |      |      | UCCGUUGUCGUCCAGC | GUUGAAACCGCUGUCU  | Transl |   |
| 18      | 748    | 3   | .8 | 1 | 25 | 561  | 585  | GGUUAGGAU        | GAUAACGGA         | ation  | 1 |
| trf_6_3 | Bra020 | 15  |    |   |    |      |      | NCCGUUGUCGUCCAGC | CCAACUGCUGGAAGAC  | Transl |   |
| 19      | 153    | 3   | .4 | 1 | 22 | 1953 | 1974 | GGUUAG           | AAUGGG            | ation  | 1 |
| trf_6_3 | Bra020 | 15  |    |   |    |      |      | UCCGUUGUCGUCCAGC | AACUGCUGGAAGACAA  | Transl |   |
| 20      | 153    | 2.5 | .4 | 1 | 20 | 1955 | 1974 | GGUU             | UGGG              | ation  | 1 |
| trf_6_3 | Bra012 | 18  |    |   |    |      |      | UCCGUUGUCGUCCAGC | AAUCGCUGAACCACAAC | Transl |   |
| 20      | 143    | 2.5 | .5 | 1 | 20 | 392  | 411  | GGUU             | GGA               | ation  | 1 |
| trf_6_3 | Bra037 | 22  |    |   |    |      |      | UCCGUUGUCGUCCAGC | AACCGCUGUCUGAUAA  | Transl |   |
| 20      | 748    | 3   | .8 | 1 | 20 | 566  | 585  | GGUU             | CGGA              | ation  | 1 |
| trf_6_3 | Bra015 | 24  |    |   |    |      |      | AUCAGAGUGGCGCAGC | CUCCGUUUCACUGCA   | Transl |   |
| 38      | 824    | 3   | .0 | 1 | 26 | 913  | 938  | GGAAGCGUGG       | CCACUCUGAC        | ation  | 1 |
|         |        |     |    |   |    |      |      |                  | CACG-             |        |   |
| trf_6_3 | Bra033 | 18  |    |   |    |      |      | AUCAGAGUGGCGCAGC | UUACGUUGCACCACUU  | Transl |   |
| 38      | 352    | 3   | .3 | 1 | 25 | 586  | 609  | GGAAGCGUG        | UGAU              | ation  | 1 |
| trf_6_3 | Bra015 | 24  |    |   |    |      |      | AUCAGAGUGGCGCAGC | CUCCGUUUCACUGCA   | Transl |   |
| 39      | 824    | 3   | .0 | 1 | 26 | 913  | 938  | GGAAGCGUGG       | CCACUCUGAC        | ation  | 1 |
| trf_6_3 | Bra033 | 3   | 18 | 1 | 25 | 586  | 609  | AUCAGAGUGGCGCAGC | CACG-             | Transl | 1 |



|         |        |   |    |   |    |      |      |                  |                  |        |   |
|---------|--------|---|----|---|----|------|------|------------------|------------------|--------|---|
| 39      | 352    |   | .3 |   |    |      |      | GGAAGCGUG        | UUACGUUGCACCACUU | ation  |   |
| trf_6_3 | Bra015 |   | 24 |   |    |      |      | AUCAGAGUGGCGCAGC | UUAU             |        |   |
| 49      | 824    | 3 | .0 | 1 | 26 | 913  | 938  | GGAAGCGUGG       | CUCCGUUUCCACUGCA | Transl | 1 |
|         |        |   |    |   |    |      |      |                  | CCACUCUGAC       | ation  |   |
|         |        |   |    |   |    |      |      |                  | CACG-            |        |   |
| trf_6_3 | Bra033 |   | 18 |   |    |      |      | AUCAGAGUGGCGCAGC | UUACGUUGCACCACUU | Transl |   |
| 49      | 352    | 3 | .3 | 1 | 25 | 586  | 609  | GGAAGCGUG        | UGAU             | ation  | 1 |
| trf_6_3 | Bra033 |   | 21 |   |    |      |      | GGGGAUGUAGCUCAAA | ACCCUUUGGGUAACAU | Transl |   |
| 64      | 370    | 3 | .6 | 1 | 20 | 4750 | 4769 | UGGU             | CCCC             | ation  | 1 |
| trf_6_3 | Bra015 |   | 24 |   |    |      |      | AUCAGAGUGGCGCAGC | CUCCGUUUCCACUGCA | Transl |   |
| 76      | 824    | 3 | .0 | 1 | 26 | 913  | 938  | GGAAGCGUGG       | CCACUCUGAC       | ation  | 1 |
|         |        |   |    |   |    |      |      |                  | CACG-            |        |   |
| trf_6_3 | Bra033 |   | 18 |   |    |      |      | AUCAGAGUGGCGCAGC | UUACGUUGCACCACUU | Transl |   |
| 76      | 352    | 3 | .3 | 1 | 25 | 586  | 609  | GGAAGCGUG        | UGAU             | ation  | 1 |
| trf_6_3 | Bra027 |   | 22 |   |    |      |      | GCCGACUUAGCUCAGU | UACCACAGGGCGAAGU | Transl |   |
| 78      | 297    | 3 | .9 | 1 | 20 | 178  | 197  | GGUA             | UGGC             | ation  | 1 |
| trf_6_3 | Bra015 |   | 24 |   |    |      |      | AUCAGAGUGGCGCAGC | CUCCGUUUCCACUGCA | Transl |   |
| 84      | 824    | 3 | .0 | 1 | 26 | 913  | 938  | GGAAGCGUGG       | CCACUCUGAC       | ation  | 1 |
|         |        |   |    |   |    |      |      |                  | CACG-            |        |   |
| trf_6_3 | Bra033 |   | 18 |   |    |      |      | AUCAGAGUGGCGCAGC | UUACGUUGCACCACUU | Transl |   |
| 84      | 352    | 3 | .3 | 1 | 25 | 586  | 609  | GGAAGCGUG        | UGAU             | ation  | 1 |
| trf_6_3 | Bra015 |   | 24 |   |    |      |      | AUCAGAGUGGCGCAGC | CUCCGUUUCCACUGCA | Transl |   |
| 85      | 824    | 3 | .0 | 1 | 26 | 913  | 938  | GGAAGCGUGG       | CCACUCUGAC       | ation  | 1 |
|         |        |   |    |   |    |      |      |                  | CACG-            |        |   |
| trf_6_3 | Bra033 |   | 18 |   |    |      |      | AUCAGAGUGGCGCAGC | UUACGUUGCACCACUU | Transl |   |
| 85      | 352    | 3 | .3 | 1 | 25 | 586  | 609  | GGAAGCGUG        | UGAU             | ation  | 1 |
| trf_6_3 | Bra033 |   | 21 |   |    |      |      | GGGGAUGUAGCUCAAA | ACCCUUUGGGUAACAU | Transl |   |
| 87      | 370    | 3 | .6 | 1 | 20 | 4750 | 4769 | UGGU             | CCCC             | ation  | 1 |
| trf_6_4 | Bra033 |   | 10 |   |    |      |      | GGGAUUGUAGUUCAA  | ACCGAUUGAUCAGCAA | Transl |   |
| 22      | 536    | 3 | .5 | 1 | 20 | 426  | 445  | UCGGU            | UUCC             | ation  | 1 |
| trf_6_4 | Bra023 |   | 12 |   |    |      |      | GGGAUUGUAGUUCAA  | UUCCAAGUGAACAUCA | Transl |   |
| 28      | 172    | 3 | .4 | 1 | 21 | 613  | 633  | UUGGAA           | AUCCC            | ation  | 1 |
| trf_6_4 | Bra034 |   | 11 |   |    |      |      | GGGAUUGUAGUUCAA  | UCCAAAUGAGCAGCAA | Transl |   |
| 28      | 753    | 3 | .6 | 1 | 20 | 443  | 462  | UUGGA            | UCCC             | ation  | 1 |

|         |        |     |    |   |    |      |      |                  |                   |        |   |
|---------|--------|-----|----|---|----|------|------|------------------|-------------------|--------|---|
| trf_6_4 | Bra003 | 13  |    |   |    |      |      | GGGAUUGUAGUUCAA  | UCCAGUUAUUCUACAA  | Transl |   |
| 28      | 597    | 3   | .1 | 1 | 20 | 1508 | 1527 | UUGGA            | UUCC              | ation  | 1 |
| trf_6_4 | Bra033 | 10  |    |   |    |      |      | GGGAUUGUAGUUCAA  | ACCGAUUGAUCAGCAA  | Transl |   |
| 29      | 536    | 3   | .5 | 1 | 20 | 426  | 445  | UCGGU            | UUCC              | ation  | 1 |
| trf_6_4 | Bra033 | 10  |    |   |    |      |      | GGGAUUGUAGUUCAA  | ACCGAUUGAUCAGCAA  | Transl |   |
| 31      | 536    | 3   | .5 | 1 | 20 | 426  | 445  | UCGGU            | UUCC              | ation  | 1 |
| trf_6_4 | Bra034 | 11  |    |   |    |      |      | GGGAUUGUAGUUCAA  | UCCAAAUGAGCAGCAA  | Transl |   |
| 37      | 753    | 3   | .6 | 1 | 20 | 443  | 462  | UUGGA            | UCCC              | ation  | 1 |
| trf_6_4 | Bra003 | 13  |    |   |    |      |      | GGGAUUGUAGUUCAA  | UCCAGUUAUUCUACAA  | Transl |   |
| 37      | 597    | 3   | .1 | 1 | 20 | 1508 | 1527 | UUGGA            | UUCC              | ation  | 1 |
| trf_6_4 | Bra023 | 12  |    |   |    |      |      | GGGAUUGUAGUUCAA  | UCCAAGUGAACAUCAA  | Transl |   |
| 37      | 172    | 3   | .4 | 1 | 20 | 614  | 633  | UUGGA            | UCCC              | ation  | 1 |
| trf_6_4 | Bra037 | 14  |    |   |    |      |      | UCCGUUGUAGUCUAGC | UGACUGGUUAGGCCAC  | Transl |   |
| 41      | 499    | 3   | .7 | 1 | 22 | 174  | 195  | UGGUCA           | AACGGA            | ation  | 1 |
| trf_6_4 | Bra018 | 15  |    |   |    |      |      | CCGACCUUAGCUCAGU | CAACAAACUGGGUGAA  | Transl |   |
| 42      | 971    | 3   | .6 | 1 | 22 | 132  | 153  | UGGUAG           | GGUCGG            | ation  | 1 |
| trf_6_4 | Bra009 | 16  |    |   |    |      |      | CCGACCUUAGCUCAGU | UCAAACUGAGCCAAGG  | Transl |   |
| 42      | 057    | 3   | .0 | 1 | 20 | 737  | 756  | UGGU             | UCGG              | ation  | 1 |
| trf_6_4 | Bra018 | 15  |    |   |    |      |      | CCGACCUUAGCUCAGU | CAACAAACUGGGUGAA  | Transl |   |
| 43      | 971    | 3   | .6 | 1 | 22 | 132  | 153  | UGGUAG           | GGUCGG            | ation  | 1 |
| trf_6_4 | Bra009 | 16  |    |   |    |      |      | CCGACCUUAGCUCAGU | UCAAACUGAGCCAAGG  | Transl |   |
| 43      | 057    | 3   | .0 | 1 | 20 | 737  | 756  | UGGU             | UCGG              | ation  | 1 |
| trf_6_4 | Bra020 | 15  |    |   |    |      |      | UCCGUUGUCGUCCAGC | CCAACUGCUGGAAGAC  | Transl |   |
| 61      | 153    | 2.5 | .4 | 1 | 22 | 1953 | 1974 | GGUUAG           | AAUGGG            | ation  | 1 |
| trf_6_4 | Bra012 | 18  |    |   |    |      |      | UCCGUUGUCGUCCAGC | AAUCGCUGAACCACAAC | Transl |   |
| 61      | 143    | 2.5 | .5 | 1 | 20 | 392  | 411  | GGUU             | GGA               | ation  | 1 |
| trf_6_4 | Bra037 | 22  |    |   |    |      |      | UCCGUUGUCGUCCAGC | AACCGCUGUCUGAUAA  | Transl |   |
| 61      | 748    | 3   | .8 | 1 | 20 | 566  | 585  | GGUU             | CGGA              | ation  | 1 |
| trf_6_4 | Bra020 | 15  |    |   |    |      |      | UCCGUUGUCGUCCAGC | CCAACUGCUGGAAGAC  | Transl |   |
| 62      | 153    | 2.5 | .4 | 1 | 22 | 1953 | 1974 | GGUUAG           | AAUGGG            | ation  | 1 |
| trf_6_4 | Bra012 | 18  |    |   |    |      |      | UCCGUUGUCGUCCAGC | AAUCGCUGAACCACAAC | Transl |   |
| 62      | 143    | 2.5 | .5 | 1 | 20 | 392  | 411  | GGUU             | GGA               | ation  | 1 |
| trf_6_4 | Bra037 | 22  |    |   |    |      |      | UCCGUUGUCGUCCAGC | GUUGAAACCGCUGUCU  | Transl |   |
| 62      | 748    | 3   | .8 | 1 | 25 | 561  | 585  | GGUUAGGAU        | GAUAACGGA         | ation  | 1 |

|         |        |     |    |   |    |      |      |                  |                   |        |   |
|---------|--------|-----|----|---|----|------|------|------------------|-------------------|--------|---|
| trf_6_4 | Bra020 | 15  |    |   |    |      |      | UCCGUUGUCGUCCAGC | CCAACUGCUGGAAGAC  | Transl |   |
| 63      | 153    | 2.5 | .4 | 1 | 22 | 1953 | 1974 | GGUUAG           | AAUGGG            | ation  | 1 |
| trf_6_4 | Bra012 | 18  |    |   |    |      |      | UCCGUUGUCGUCCAGC | AAUCGCUGAACCACAAC | Transl |   |
| 63      | 143    | 2.5 | .5 | 1 | 20 | 392  | 411  | GGUU             | GGA               | ation  | 1 |
| trf_6_4 | Bra037 | 22  |    |   |    |      |      | UCCGUUGUCGUCCAGC | GUUGAAACCGCUGUCU  | Transl |   |
| 63      | 748    | 3   | .8 | 1 | 25 | 561  | 585  | GGUUAGGAU        | GAUAACGGA         | ation  | 1 |
| trf_6_4 | Bra020 | 15  |    |   |    |      |      | UCCGUUGUCGUCCAGC | CCAACUGCUGGAAGAC  | Transl |   |
| 64      | 153    | 2.5 | .4 | 1 | 22 | 1953 | 1974 | GGUUAG           | AAUGGG            | ation  | 1 |
| trf_6_4 | Bra012 | 18  |    |   |    |      |      | UCCGUUGUCGUCCAGC | AAUCGCUGAACCACAAC | Transl |   |
| 64      | 143    | 2.5 | .5 | 1 | 20 | 392  | 411  | GGUU             | GGA               | ation  | 1 |
| trf_6_4 | Bra037 | 22  |    |   |    |      |      | UCCGUUGUCGUCCAGC | GUUGAAACCGCUGUCU  | Transl |   |
| 64      | 748    | 3   | .8 | 1 | 25 | 561  | 585  | GGUUAGGAU        | GAUAACGGA         | ation  | 1 |
| trf_6_4 | Bra020 | 15  |    |   |    |      |      | UCCGUUGUCGUCCAGC | AACUGCUGGAAGACAA  | Transl |   |
| 65      | 153    | 2.5 | .4 | 1 | 20 | 1955 | 1974 | GGUU             | UGGG              | ation  | 1 |
| trf_6_4 | Bra012 | 18  |    |   |    |      |      | UCCGUUGUCGUCCAGC | AAUCGCUGAACCACAAC | Transl |   |
| 65      | 143    | 2.5 | .5 | 1 | 20 | 392  | 411  | GGUU             | GGA               | ation  | 1 |
| trf_6_4 | Bra037 | 22  |    |   |    |      |      | UCCGUUGUCGUCCAGC | AACCGCUGUCUGAUAA  | Transl |   |
| 65      | 748    | 3   | .8 | 1 | 20 | 566  | 585  | GGUU             | CGGA              | ation  | 1 |
| trf_6_4 | Bra020 | 15  |    |   |    |      |      | UCCGUUGUCGUCCAGC | AACUGCUGGAAGACAA  | Transl |   |
| 66      | 153    | 2.5 | .4 | 1 | 20 | 1955 | 1974 | GGUU             | UGGG              | ation  | 1 |
| trf_6_4 | Bra012 | 18  |    |   |    |      |      | UCCGUUGUCGUCCAGC | AAUCGCUGAACCACAAC | Transl |   |
| 66      | 143    | 2.5 | .5 | 1 | 20 | 392  | 411  | GGUU             | GGA               | ation  | 1 |
| trf_6_4 | Bra037 | 22  |    |   |    |      |      | UCCGUUGUCGUCCAGC | AACCGCUGUCUGAUAA  | Transl |   |
| 66      | 748    | 3   | .8 | 1 | 20 | 566  | 585  | GGUU             | CGGA              | ation  | 1 |
| trf_6_4 | Bra020 | 15  |    |   |    |      |      | UCCGUUGUCGUCCAGC | CCAACUGCUGGAAGAC  | Transl |   |
| 67      | 153    | 2.5 | .4 | 1 | 22 | 1953 | 1974 | GGUUAG           | AAUGGG            | ation  | 1 |
| trf_6_4 | Bra012 | 18  |    |   |    |      |      | UCCGUUGUCGUCCAGC | AAUCGCUGAACCACAAC | Transl |   |
| 67      | 143    | 2.5 | .5 | 1 | 20 | 392  | 411  | GGUU             | GGA               | ation  | 1 |
| trf_6_4 | Bra037 | 22  |    |   |    |      |      | UCCGUUGUCGUCCAGC | AACCGCUGUCUGAUAA  | Transl |   |
| 67      | 748    | 3   | .8 | 1 | 20 | 566  | 585  | GGUU             | CGGA              | ation  | 1 |
| trf_6_4 | Bra033 | 21  |    |   |    |      |      | GGGGAUGUAGCUCAAA | ACCCUUUGGGUAACAU  | Transl |   |
| 77      | 370    | 3   | .6 | 1 | 20 | 4750 | 4769 | UGGU             | CCCC              | ation  | 1 |
| trf_6_4 | Bra018 | 15  |    |   |    |      |      | CCGACCUUAGCUCAGU | CAACAAACUGGGUGAA  | Transl |   |
| 78      | 971    | 3   | .6 | 1 | 22 | 132  | 153  | UGGUAG           | GGUCGG            | ation  | 1 |

|         |        |     |    |   |    |      |      |                  |                  |        |   |
|---------|--------|-----|----|---|----|------|------|------------------|------------------|--------|---|
| trf_6_4 | Bra009 | 16  |    |   |    |      |      | CCGACCUUAGCUCAGU | UCAAACUGAGCCAAGG | Transl |   |
| 78      | 057    | 3   | .0 | 1 | 20 | 737  | 756  | UGGU             | UCGG             | ation  | 1 |
| trf_6_4 | Bra032 | 22  |    |   |    |      |      | GCUGGAGUAGCUCAGU | AUCGGCUGAGCCACUC | Transl |   |
| 96      | 168    | 2.5 | .3 | 1 | 20 | 150  | 169  | UGGU             | CAGC             | ation  | 1 |
| trf_6_4 | Bra005 | 13  |    |   |    |      |      | GCUGGAGU-        | AACCAACUGAUCUCAC | Transl |   |
| 96      | 116    | 3   | .5 | 1 | 21 | 233  | 254  | AGCUCAGUUGGUU    | UCCAGC           | ation  | 1 |
| trf_6_4 | Bra022 | 23  |    |   |    |      |      | GCUGGAGUAGCUCAGU | AUCAAUUGGGAUACUC | Transl |   |
| 96      | 251    | 3   | .9 | 1 | 20 | 3475 | 3494 | UGGU             | UAGC             | ation  | 1 |
| trf_6_5 | Bra037 | 14  |    |   |    |      |      | UCCGUUGUAGUCUAGC | UGACUGGUUAGGCCAC | Transl |   |
| 12      | 499    | 3   | .7 | 1 | 22 | 174  | 195  | UGGUCA           | AACGGA           | ation  | 1 |
| trf_6_5 | Bra015 | 24  |    |   |    |      |      | AUCAGAGUGGCGCAGC | CUCCGUUUCCACUGCA | Transl |   |
| 13      | 824    | 3   | .0 | 1 | 26 | 913  | 938  | GGAAGCGUGG       | CCACUCUGAC       | ation  | 1 |
|         |        |     |    |   |    |      |      | CACG-            |                  |        |   |
| trf_6_5 | Bra033 | 18  |    |   |    |      |      | AUCAGAGUGGCGCAGC | UUACGUUGCACCACUU | Transl |   |
| 13      | 352    | 3   | .3 | 1 | 25 | 586  | 609  | GGAAGCGUG        | UGAU             | ation  | 1 |
| trf_6_5 | Bra001 | 15  |    |   |    |      |      | GGGUGUUUGGUCUAG  | GUACCACUAGACGAAU | Transl |   |
| 23      | 210    | 3   | .7 | 1 | 21 | 2173 | 2193 | UGGUUAU          | CACCU            | ation  | 1 |
| trf_6_5 | Bra033 | 21  |    |   |    |      |      | GGGGAUGUAGCUAAA  | ACCCUUUGGGUAACAU | Transl |   |
| 24      | 370    | 3   | .6 | 1 | 20 | 4750 | 4769 | UGGU             | CCCC             | ation  | 1 |
| trf_6_5 | Bra015 | 24  |    |   |    |      |      | AUCAGAGUGGCGCAGC | CUCCGUUUCCACUGCA | Transl |   |
| 25      | 824    | 3   | .0 | 1 | 26 | 913  | 938  | GGAAGCGUGG       | CCACUCUGAC       | ation  | 1 |
|         |        |     |    |   |    |      |      | CACG-            |                  |        |   |
| trf_6_5 | Bra033 | 18  |    |   |    |      |      | AUCAGAGUGGCGCAGC | UUACGUUGCACCACUU | Transl |   |
| 25      | 352    | 3   | .3 | 1 | 25 | 586  | 609  | GGAAGCGUG        | UGAU             | ation  | 1 |
| trf_6_5 | Bra037 | 14  |    |   |    |      |      | UCCGUUGUAGUCUAGC | UGACUGGUUAGGCCAC | Transl |   |
| 27      | 499    | 3   | .7 | 1 | 22 | 174  | 195  | UGGUCA           | AACGGA           | ation  | 1 |

# tRF Endosperm

| ncRNA<br>_Acc. | Target<br>_Acc. | Expect<br>ation | U<br>PE | ncRNA<br>_start | ncRNA<br>_end | Target_<br>start | Target<br>_end | ncRNA_aligned_fragme<br>nt | Target_aligned_fragme<br>nt | Inhibit<br>ion | Multip<br>licity |
|----------------|-----------------|-----------------|---------|-----------------|---------------|------------------|----------------|----------------------------|-----------------------------|----------------|------------------|
|                | Bra024          |                 | 7.      |                 |               |                  |                | GGGGAUGUAGCUCAAA           | UCCAACAUUUCGGUUA            | Cleava         |                  |
| trf_7_1        | 638             | 3               | 5       | 1               | 23            | 203              | 225            | UGGUAGA                    | CAUCCCC                     | ge             | 1                |
|                | Bra025          |                 | 17      |                 |               |                  |                | GGGGAUGUAGCUCAAA           | ACAAUUUGAGCUUCAU            | Cleava         |                  |
| trf_7_1        | 904             | 3               | .2      | 1               | 20            | 344              | 363            | UGGU                       | CUUC                        | ge             | 1                |
|                | Bra024          |                 | 7.      |                 |               |                  |                | GGGGAUGUAGCUCAAA           | UCCAACAUUUCGGUUA            | Cleava         |                  |
| trf_7_2        | 638             | 3               | 5       | 1               | 23            | 203              | 225            | UGGUAGA                    | CAUCCCC                     | ge             | 1                |
|                | Bra025          |                 | 17      |                 |               |                  |                | GGGGAUGUAGCUCAAA           | ACAAUUUGAGCUUCAU            | Cleava         |                  |
| trf_7_2        | 904             | 3               | .2      | 1               | 20            | 344              | 363            | UGGU                       | CUUC                        | ge             | 1                |
|                | Bra000          |                 | 11      |                 |               |                  |                | UCCGUUAUCGUCCAGC           | UAACCGGAGGACGAUA            | Cleava         |                  |
| trf_7_3        | 529             | 2.5             | .2      | 1               | 21            | 984              | 1004           | GGUUA                      | AUGGA                       | ge             | 1                |
|                | Bra032          |                 | 22      |                 |               |                  |                | UCCGUUAUCGUCCAGC           | GACGGCUUGACGAUGA            | Cleava         |                  |
| trf_7_3        | 111             | 3               | .4      | 1               | 20            | 727              | 746            | GGUU                       | CGGA                        | ge             | 1                |
|                | Bra000          |                 | 11      |                 |               |                  |                | UCCGUUAUCGUCCAGC           | UAACCGGAGGACGAUA            | Cleava         |                  |
| trf_7_4        | 529             | 2.5             | .2      | 1               | 21            | 984              | 1004           | GGUUA                      | AUGGA                       | ge             | 1                |
|                | Bra032          |                 | 22      |                 |               |                  |                | UCCGUUAUCGUCCAGC           | GACGGCUUGACGAUGA            | Cleava         |                  |
| trf_7_4        | 111             | 3               | .4      | 1               | 20            | 727              | 746            | GGUU                       | CGGA                        | ge             | 1                |
|                | Bra000          |                 | 11      |                 |               |                  |                | UCCGUUAUCGUCCAGC           | UAACCGGAGGACGAUA            | Cleava         |                  |
| trf_7_5        | 529             | 2.5             | .2      | 1               | 21            | 984              | 1004           | GGUUA                      | AUGGA                       | ge             | 1                |
|                | Bra032          |                 | 22      |                 |               |                  |                | UCCGUUAUCGUCCAGC           | GACGGCUUGACGAUGA            | Cleava         |                  |
| trf_7_5        | 111             | 3               | .4      | 1               | 20            | 727              | 746            | GGUU                       | CGGA                        | ge             | 1                |
|                | Bra000          |                 | 11      |                 |               |                  |                | UCCGUUAUCGUCCAGC           | UAACCGGAGGACGAUA            | Cleava         |                  |
| trf_7_6        | 529             | 2.5             | .2      | 1               | 21            | 984              | 1004           | GGUUA                      | AUGGA                       | ge             | 1                |
|                | Bra032          |                 | 22      |                 |               |                  |                | UCCGUUAUCGUCCAGC           | GACGGCUUGACGAUGA            | Cleava         |                  |
| trf_7_6        | 111             | 3               | .4      | 1               | 20            | 727              | 746            | GGUU                       | CGGA                        | ge             | 1                |
|                | Bra000          |                 | 11      |                 |               |                  |                | UCCGUUAUCGUCCAGC           | UAACCGGAGGACGAUA            | Cleava         |                  |
| trf_7_7        | 529             | 2.5             | .2      | 1               | 21            | 984              | 1004           | GGUUA                      | AUGGA                       | ge             | 1                |
|                | Bra032          |                 | 22      |                 |               |                  |                | UCCGUUAUCGUCCAGC           | GACGGCUUGACGAUGA            | Cleava         |                  |
| trf_7_7        | 111             | 3               | .4      | 1               | 20            | 727              | 746            | GGUU                       | CGGA                        | ge             | 1                |
|                | Bra000          |                 | 11      |                 |               |                  |                | UCCGUUAUCGUCCAGC           | AACCGGAGGACGAUAA            | Cleava         |                  |
| trf_7_8        | 529             | 2.5             | .2      | 1               | 20            | 985              | 1004           | GGUU                       | UGGA                        | ge             | 1                |

|         |        |     |    |   |    |      |      |                  |                   |        |   |
|---------|--------|-----|----|---|----|------|------|------------------|-------------------|--------|---|
|         | Bra032 |     | 22 |   |    |      |      | UCCGUUAUCGUCCAGC | GACGGCUUGACGAUGA  | Cleava |   |
| trf_7_8 | 111    | 3   | .4 | 1 | 20 | 727  | 746  | GGUU             | CGGA              | ge     | 1 |
|         | Bra000 |     | 11 |   |    |      |      | UCCGUUAUCGUCCAGC | UAACCGGAGGACGAUA  | Cleava |   |
| trf_7_9 | 529    | 2.5 | .2 | 1 | 21 | 984  | 1004 | GGUUA            | AUGGA             | ge     | 1 |
|         | Bra032 |     | 22 |   |    |      |      | UCCGUUAUCGUCCAGC | GACGGCUUGACGAUGA  | Cleava |   |
| trf_7_9 | 111    | 3   | .4 | 1 | 20 | 727  | 746  | GGUU             | CGGA              | ge     | 1 |
| trf_7_1 | Bra013 |     | 22 |   |    |      |      | UCCGUUGUAGUCUAGC | CAUCAUCAGCUUGGCU  | Cleava |   |
| 2       | 528    | 3   | .0 | 1 | 24 | 196  | 219  | UGGUUAGG         | AUAACGGG          | ge     | 1 |
| trf_7_1 | Bra024 |     | 7. |   |    |      |      | GGGGAUGUAGCUCAA  | UCCAACAUUUCGGUUA  | Cleava |   |
| 3       | 638    | 3   | 5  | 1 | 23 | 203  | 225  | UGGUAGA          | CAUCCCC           | ge     | 1 |
| trf_7_1 | Bra025 |     | 17 |   |    |      |      | GGGGAUGUAGCUCAA  | ACAAUUUGAGCUUCAU  | Cleava |   |
| 3       | 904    | 3   | .2 | 1 | 20 | 344  | 363  | UGGU             | CUUC              | ge     | 1 |
| trf_7_1 | Bra016 |     | 20 |   |    |      |      | UCCGUCGUAGUCUAGC | CUGAAGAAGCUAGGCU  | Cleava |   |
| 5       | 601    | 3   | .8 | 1 | 24 | 415  | 438  | UGGUUAGG         | GCGACGGA          | ge     | 1 |
| trf_7_1 | Bra016 |     | 20 |   |    |      |      | UCCGUCGUAGUCUAGC | CUGAAGAAGCUAGGCU  | Cleava |   |
| 6       | 601    | 3   | .8 | 1 | 24 | 415  | 438  | UGGUUAGG         | GCGACGGA          | ge     | 1 |
| trf_7_1 | Bra024 |     | 7. |   |    |      |      | GGGGAUGUAGCUCAA  | UCCAACAUUUCGGUUA  | Cleava |   |
| 8       | 638    | 3   | 5  | 1 | 23 | 203  | 225  | UGGUAGA          | CAUCCCC           | ge     | 1 |
| trf_7_1 | Bra025 |     | 17 |   |    |      |      | GGGGAUGUAGCUCAA  | ACAAUUUGAGCUUCAU  | Cleava |   |
| 8       | 904    | 3   | .2 | 1 | 20 | 344  | 363  | UGGU             | CUUC              | ge     | 1 |
| trf_7_1 | Bra009 |     | 14 |   |    |      |      | GGGGAUGUAGCUCAGA | UUAUCAUCUGGGCUUC  | Cleava |   |
| 9       | 876    | 3   | .9 | 1 | 22 | 16   | 37   | UGGUAG           | GUCCUC            | ge     | 1 |
| trf_7_1 | Bra016 |     | 10 |   |    |      |      | GGGGAUGUAGCUCAGA | UUAUCAUCUGAGCUUC  | Cleava |   |
| 9       | 141    | 3   | .4 | 1 | 22 | 3031 | 3052 | UGGUAG           | GUUCUC            | ge     | 1 |
| trf_7_1 | Bra036 |     | 20 |   |    |      |      | GGGGAUGUAGCUCAGA | UCGACUGGCUGAGCUA  | Cleava |   |
| 9       | 771    | 3   | .2 | 1 | 23 | 5375 | 5397 | UGGUAGA          | CAUUCCU           | ge     | 1 |
| trf_7_1 | Bra018 |     | 8. |   |    |      |      | GGGGAUGUAGCUCAGA | GCCACCUCAGCUACAUC | Cleava |   |
| 9       | 620    | 3   | 3  | 1 | 20 | 7    | 26   | UGGU             | CUC               | ge     | 1 |
| trf_7_2 | Bra005 |     | 12 |   |    |      |      | GUGGCUGUAGUUUAG  | CACCGCUGAACUAUGG  | Cleava |   |
| 5       | 511    | 2.5 | .8 | 1 | 20 | 1115 | 1134 | UGGUG            | CUAC              | ge     | 1 |
| trf_7_2 | Bra009 |     | 12 |   |    |      |      | GUGGCUGUAGUUUAG  | CAACAUUGAGCUACAG  | Cleava |   |
| 5       | 047    | 3   | .1 | 1 | 20 | 243  | 262  | UGGUG            | CCAU              | ge     | 1 |
| trf_7_2 | Bra035 |     | 17 |   |    |      |      | GUGGCUGUAGUUUAG  | CAUCUCUAGGCUACAG  | Cleava |   |
| 5       | 454    | 3   | .9 | 1 | 20 | 1245 | 1264 | UGGUG            | CCAU              | ge     | 1 |

|         |        |    |    |   |    |      |      |                  |                   |        |   |
|---------|--------|----|----|---|----|------|------|------------------|-------------------|--------|---|
| trf_7_3 | Bra009 | 14 |    |   |    |      |      | GGGGAUGUAGCUCAGA | UUAUCAUCUGGGCUUC  | Cleava |   |
| 4       | 876    | 3  | .9 | 1 | 22 | 16   | 37   | UGGUAG           | GUCCUC            | ge     | 1 |
| trf_7_3 | Bra016 | 10 |    |   |    |      |      | GGGGAUGUAGCUCAGA | UUAUCAUCUGAGCUUC  | Cleava |   |
| 4       | 141    | 3  | .4 | 1 | 22 | 3031 | 3052 | UGGUAG           | GUUCUC            | ge     | 1 |
| trf_7_3 | Bra036 | 20 |    |   |    |      |      | GGGGAUGUAGCUCAGA | UCGACUGGCUGAGCUA  | Cleava |   |
| 4       | 771    | 3  | .2 | 1 | 23 | 5375 | 5397 | UGGUAGA          | CAUUCCU           | ge     | 1 |
| trf_7_3 | Bra018 | 8. |    |   |    |      |      | GGGGAUGUAGCUCAGA | GCCACCUCAGCUACAUC | Cleava |   |
| 4       | 620    | 3  | 3  | 1 | 20 | 7    | 26   | UGGU             | CUC               | ge     | 1 |
| trf_7_3 | Bra024 | 7. |    |   |    |      |      | GGGGAUGUAGCUCAA  | UCCAACAUUUCGGUUA  | Cleava |   |
| 7       | 638    | 3  | 5  | 1 | 23 | 203  | 225  | UGGUAGA          | CAUCCCC           | ge     | 1 |
| trf_7_3 | Bra025 | 17 |    |   |    |      |      | GGGGAUGUAGCUCAA  | ACAAUUUGAGCUUCAU  | Cleava |   |
| 7       | 904    | 3  | .2 | 1 | 20 | 344  | 363  | UGGU             | CUUC              | ge     | 1 |
| trf_7_4 | Bra009 | 14 |    |   |    |      |      | GGGGAUGUAGCUCAGA | UUAUCAUCUGGGCUUC  | Cleava |   |
| 7       | 876    | 3  | .9 | 1 | 22 | 16   | 37   | UGGUAG           | GUCCUC            | ge     | 1 |
| trf_7_4 | Bra016 | 10 |    |   |    |      |      | GGGGAUGUAGCUCAGA | UUAUCAUCUGAGCUUC  | Cleava |   |
| 7       | 141    | 3  | .4 | 1 | 22 | 3031 | 3052 | UGGUAG           | GUUCUC            | ge     | 1 |
| trf_7_4 | Bra036 | 20 |    |   |    |      |      | GGGGAUGUAGCUCAGA | UCGACUGGCUGAGCUA  | Cleava |   |
| 7       | 771    | 3  | .2 | 1 | 23 | 5375 | 5397 | UGGUAGA          | CAUUCCU           | ge     | 1 |
| trf_7_4 | Bra018 | 8. |    |   |    |      |      | GGGGAUGUAGCUCAGA | GCCACCUCAGCUACAUC | Cleava |   |
| 7       | 620    | 3  | 3  | 1 | 20 | 7    | 26   | UGGU             | CUC               | ge     | 1 |
| trf_7_4 | Bra013 | 16 |    |   |    |      |      | UCCGUUGUCGUCCAGC | UAACCGAUGGAUGUCA  | Cleava |   |
| 8       | 584    | 3  | .4 | 1 | 21 | 890  | 910  | GGUUA            | AUGGA             | ge     | 1 |
| trf_7_4 | Bra000 | 11 |    |   |    |      |      | UCCGUUGUCGUCCAGC | UAACCGGAGGACGAUA  | Cleava |   |
| 8       | 529    | 3  | .2 | 1 | 21 | 984  | 1004 | GGUUA            | AUGGA             | ge     | 1 |
| trf_7_4 | Bra013 | 16 |    |   |    |      |      | UCCGUUGUCGUCCAGC | UAUGAUAAACCGAUGGA | Cleava |   |
| 9       | 584    | 3  | .4 | 1 | 26 | 885  | 910  | GGUUAGGAUA       | UGUCAAUUGGA       | ge     | 1 |
| trf_7_4 | Bra000 | 11 |    |   |    |      |      | UCCGUUGUCGUCCAGC | UAACCGGAGGACGAUA  | Cleava |   |
| 9       | 529    | 3  | .2 | 1 | 21 | 984  | 1004 | GGUUA            | AUGGA             | ge     | 1 |
| trf_7_5 | Bra013 | 16 |    |   |    |      |      | UCCGUUGUCGUCCAGC | AUGAUAAACCGAUGGAU | Cleava |   |
| 0       | 584    | 3  | .4 | 1 | 25 | 886  | 910  | GGUUAGGAU        | GUCAAUGGA         | ge     | 1 |
| trf_7_5 | Bra000 | 11 |    |   |    |      |      | UCCGUUGUCGUCCAGC | UAACCGGAGGACGAUA  | Cleava |   |
| 0       | 529    | 3  | .2 | 1 | 21 | 984  | 1004 | GGUUA            | AUGGA             | ge     | 1 |
| trf_7_5 | Bra013 | 16 |    |   |    |      |      | UCCGUUGUCGUCCAGC | UAUGAUAAACCGAUGGA | Cleava |   |
| 1       | 584    | 3  | .4 | 1 | 26 | 885  | 910  | GGUUAGGAUA       | UGUCAAUUGGA       | ge     | 1 |

|         |        |     |    |   |    |      |      |                  |                  |        |   |
|---------|--------|-----|----|---|----|------|------|------------------|------------------|--------|---|
| trf_7_5 | Bra000 | 11  |    |   |    |      |      | UCCGUUGUCGUCCAGC | UAACCGGAGGACGAUA | Cleava |   |
| 1       | 529    | 3   | .2 | 1 | 21 | 984  | 1004 | GGUUA            | AUGGA            | ge     | 1 |
| trf_7_5 | Bra013 | 16  |    |   |    |      |      | UCCGUUGUCGUCCAGC | AACCGAUGGAUGUCA  | Cleava |   |
| 3       | 584    | 3   | .4 | 1 | 20 | 891  | 910  | GGUU             | UGGA             | ge     | 1 |
| trf_7_5 | Bra000 | 11  |    |   |    |      |      | UCCGUUGUCGUCCAGC | AACCGGAGGACGAUA  | Cleava |   |
| 3       | 529    | 3   | .2 | 1 | 20 | 985  | 1004 | GGUU             | UGGA             | ge     | 1 |
| trf_7_5 | Bra005 | 12  |    |   |    |      |      | GUGGCUGUAGUUUAG  | CACCGCUGAACUAUGG | Cleava |   |
| 8       | 511    | 2.5 | .8 | 1 | 20 | 1115 | 1134 | UGGUG            | CUAC             | ge     | 1 |
| trf_7_5 | Bra009 | 12  |    |   |    |      |      | GUGGCUGUAGUUUAG  | CAACAUUGAGCUACAG | Cleava |   |
| 8       | 047    | 3   | .1 | 1 | 20 | 243  | 262  | UGGUG            | CCAU             | ge     | 1 |
| trf_7_5 | Bra035 | 17  |    |   |    |      |      | GUGGCUGUAGUUUAG  | CAUCUCUAGGCUACAG | Cleava |   |
| 8       | 454    | 3   | .9 | 1 | 20 | 1245 | 1264 | UGGUG            | CCAU             | ge     | 1 |
| trf_7_6 | Bra024 | 7.  |    |   |    |      |      | GGGGAUGUAGCUCAAA | UCCAACAUUUCGGUUA | Cleava |   |
| 9       | 638    | 3   | 5  | 1 | 23 | 203  | 225  | UGGUAGA          | CAUCCCC          | ge     | 1 |
| trf_7_6 | Bra025 | 17  |    |   |    |      |      | GGGGAUGUAGCUCAAA | ACAAUUUGAGCUUCAU | Cleava |   |
| 9       | 904    | 3   | .2 | 1 | 20 | 344  | 363  | UGGU             | CUUC             | ge     | 1 |
| trf_7_7 | Bra014 | 17  |    |   |    |      |      | GGGGAUGUAGCUCAUA | UGUAUUUAUUAGCU   | Cleava |   |
| 0       | 507    | 3   | .0 | 1 | 23 | 541  | 563  | UGGUAGA          | AUAUCUCC         | ge     | 1 |
| trf_7_7 | Bra024 | 7.  |    |   |    |      |      | GGGGAUGUAGCUCAAA | UCCAACAUUUCGGUUA | Cleava |   |
| 1       | 638    | 3   | 5  | 1 | 24 | 202  | 225  | UGGUAGAG         | ACAUCCCC         | ge     | 1 |
| trf_7_7 | Bra025 | 17  |    |   |    |      |      | GGGGAUGUAGCUCAAA | ACAAUUUGAGCUUCAU | Cleava |   |
| 1       | 904    | 3   | .2 | 1 | 20 | 344  | 363  | UGGU             | CUUC             | ge     | 1 |
| trf_7_7 | Bra024 | 7.  |    |   |    |      |      | GGGGAUGUAGCUCAAA | UCCAACAUUUCGGUUA | Cleava |   |
| 2       | 638    | 3   | 5  | 1 | 23 | 203  | 225  | UGGUAGA          | CAUCCCC          | ge     | 1 |
| trf_7_7 | Bra025 | 17  |    |   |    |      |      | GGGGAUGUAGCUCAAA | ACAAUUUGAGCUUCAU | Cleava |   |
| 2       | 904    | 3   | .2 | 1 | 20 | 344  | 363  | UGGU             | CUUC             | ge     | 1 |
| trf_7_7 | Bra024 | 7.  |    |   |    |      |      | GGGGAUGUAGCUCAAA | UCCAACAUUUCGGUUA | Cleava |   |
| 5       | 638    | 3   | 5  | 1 | 23 | 203  | 225  | UGGUAGA          | CAUCCCC          | ge     | 1 |
| trf_7_7 | Bra025 | 17  |    |   |    |      |      | GGGGAUGUAGCUCAAA | ACAAUUUGAGCUUCAU | Cleava |   |
| 5       | 904    | 3   | .2 | 1 | 20 | 344  | 363  | UGGU             | CUUC             | ge     | 1 |
| trf_7_7 | Bra009 | 14  |    |   |    |      |      | GGGGAUGUAGCUCAGA | UUAUCAUCUGGGCUUC | Cleava |   |
| 6       | 876    | 3   | .9 | 1 | 22 | 16   | 37   | UGGUAG           | GUCCUC           | ge     | 1 |
| trf_7_7 | Bra016 | 10  |    |   |    |      |      | GGGGAUGUAGCUCAGA | UUAUCAUCUGAGCUUC | Cleava |   |
| 6       | 141    | 3   | .4 | 1 | 22 | 3031 | 3052 | UGGUAG           | GUUCUC           | ge     | 1 |



|         |        |     |    |   |    |      |      |                  |                   |        |   |
|---------|--------|-----|----|---|----|------|------|------------------|-------------------|--------|---|
| trf_7_7 | Bra036 | 20  |    |   |    |      |      | GGGGAUGUAGCUCAGA | UCGACUGGCUGAGCUA  | Cleava |   |
| 6       | 771    | 3   | .2 | 1 | 23 | 5375 | 5397 | UGGUAGA          | CAUUCCU           | ge     | 1 |
| trf_7_7 | Bra018 | 8.  |    |   |    |      |      | GGGGAUGUAGCUCAGA | GCCACCUCAGCUACAUC | Cleava |   |
| 6       | 620    | 3   | 3  | 1 | 20 | 7    | 26   | UGGU             | CUC               | ge     | 1 |
| trf_7_8 | Bra005 | 12  |    |   |    |      |      | GUGGCUGUAGUUUAG  | CUCACCGCUGAACUAU  | Cleava |   |
| 2       | 511    | 2.5 | .8 | 1 | 22 | 1113 | 1134 | UGGUGAG          | GGCUAC            | ge     | 1 |
| trf_7_8 | Bra035 | 17  |    |   |    |      |      | GUGGCUGUAGUUUAG  | UUCAUCUCUAGGCUAC  | Cleava |   |
| 2       | 454    | 3   | .9 | 1 | 22 | 1243 | 1264 | UGGUGAG          | AGCCAU            | ge     | 1 |
| trf_7_8 | Bra009 | 12  |    |   |    |      |      | GUGGCUGUAGUUUAG  | CAACAUUGAGCUACAG  | Cleava |   |
| 2       | 047    | 3   | .1 | 1 | 20 | 243  | 262  | UGGUG            | CCAU              | ge     | 1 |
| trf_7_8 | Bra009 | 14  |    |   |    |      |      | GGGGAUGUAGCUCAGA | UUAUCAUCUGGGCUUC  | Cleava |   |
| 6       | 876    | 3   | .9 | 1 | 22 | 16   | 37   | UGGUAG           | GUCCUC            | ge     | 1 |
| trf_7_8 | Bra016 | 10  |    |   |    |      |      | GGGGAUGUAGCUCAGA | UUAUCAUCUGAGCUUC  | Cleava |   |
| 6       | 141    | 3   | .4 | 1 | 22 | 3031 | 3052 | UGGUAG           | GUUCUC            | ge     | 1 |
| trf_7_8 | Bra036 | 20  |    |   |    |      |      | GGGGAUGUAGCUCAGA | UCGACUGGCUGAGCUA  | Cleava |   |
| 6       | 771    | 3   | .2 | 1 | 23 | 5375 | 5397 | UGGUAGA          | CAUUCCU           | ge     | 1 |
| trf_7_8 | Bra018 | 8.  |    |   |    |      |      | GGGGAUGUAGCUCAGA | GCCACCUCAGCUACAUC | Cleava |   |
| 6       | 620    | 3   | 3  | 1 | 20 | 7    | 26   | UGGU             | CUC               | ge     | 1 |
| trf_7_8 | Bra009 | 14  |    |   |    |      |      | GGGGAUGUAGCUCAGA | UUAUCAUCUGGGCUUC  | Cleava |   |
| 7       | 876    | 3   | .9 | 1 | 22 | 16   | 37   | UGGUAG           | GUCCUC            | ge     | 1 |
| trf_7_8 | Bra016 | 10  |    |   |    |      |      | GGGGAUGUAGCUCAGA | UUAUCAUCUGAGCUUC  | Cleava |   |
| 7       | 141    | 3   | .4 | 1 | 22 | 3031 | 3052 | UGGUAG           | GUUCUC            | ge     | 1 |
| trf_7_8 | Bra036 | 20  |    |   |    |      |      | GGGGAUGUAGCUCAGA | UCGACUGGCUGAGCUA  | Cleava |   |
| 7       | 771    | 3   | .2 | 1 | 23 | 5375 | 5397 | UGGUAGA          | CAUUCCU           | ge     | 1 |
| trf_7_8 | Bra018 | 8.  |    |   |    |      |      | GGGGAUGUAGCUCAGA | GCCACCUCAGCUACAUC | Cleava |   |
| 7       | 620    | 3   | 3  | 1 | 20 | 7    | 26   | UGGU             | CUC               | ge     | 1 |
| trf_7_8 | Bra009 | 14  |    |   |    |      |      | GGGGAUGUAGCUCAGA | UUAUCAUCUGGGCUUC  | Cleava |   |
| 8       | 876    | 3   | .9 | 1 | 22 | 16   | 37   | UGGUAG           | GUCCUC            | ge     | 1 |
| trf_7_8 | Bra016 | 10  |    |   |    |      |      | GGGGAUGUAGCUCAGA | UUAUCAUCUGAGCUUC  | Cleava |   |
| 8       | 141    | 3   | .4 | 1 | 22 | 3031 | 3052 | UGGUAG           | GUUCUC            | ge     | 1 |
| trf_7_8 | Bra036 | 20  |    |   |    |      |      | GGGGAUGUAGCUCAGA | UCGACUGGCUGAGCUA  | Cleava |   |
| 8       | 771    | 3   | .2 | 1 | 23 | 5375 | 5397 | UGGUAGA          | CAUUCCU           | ge     | 1 |
| trf_7_8 | Bra018 | 8.  |    |   |    |      |      | GGGGAUGUAGCUCAGA | GCCACCUCAGCUACAUC | Cleava |   |
| 8       | 620    | 3   | 3  | 1 | 20 | 7    | 26   | UGGU             | CUC               | ge     | 1 |

|         |        |     |    |   |    |      |      |                  |                   |        |   |
|---------|--------|-----|----|---|----|------|------|------------------|-------------------|--------|---|
| trf_7_9 | Bra009 | 14  |    |   |    |      |      | GGGGAUGUAGCUCAGA | UUAUCAUCUGGGCUUC  | Cleava |   |
| 5       | 876    | 3   | .9 | 1 | 22 | 16   | 37   | UGGUAG           | GUCCUC            | ge     | 1 |
| trf_7_9 | Bra016 | 10  |    |   |    |      |      | GGGGAUGUAGCUCAGA | UUAUCAUCUGAGCUUC  | Cleava |   |
| 5       | 141    | 3   | .4 | 1 | 22 | 3031 | 3052 | UGGUAG           | GUUCUC            | ge     | 1 |
| trf_7_9 | Bra036 | 20  |    |   |    |      |      | GGGGAUGUAGCUCAGA | UCGACUGGCUGAGCUA  | Cleava |   |
| 5       | 771    | 3   | .2 | 1 | 23 | 5375 | 5397 | UGGUAGA          | CAUUCCU           | ge     | 1 |
| trf_7_9 | Bra018 | 8.  |    |   |    |      |      | GGGGAUGUAGCUCAGA | GCCACCUCAGCUACAUC | Cleava |   |
| 5       | 620    | 3   | 3  | 1 | 20 | 7    | 26   | UGGU             | CUC               | ge     | 1 |
| trf_7_1 | Bra000 | 11  |    |   |    |      |      | UCCGUUAUCGUCCAGC | UAACCGGAGGACGAUA  | Cleava |   |
| 07      | 529    | 2.5 | .2 | 1 | 21 | 984  | 1004 | GGUUA            | AUGGA             | ge     | 1 |
| trf_7_1 | Bra032 | 22  |    |   |    |      |      | UCCGUUAUCGUCCAGC | GACGGCUUGACGAUGA  | Cleava |   |
| 07      | 111    | 3   | .4 | 1 | 20 | 727  | 746  | GGUU             | CGGA              | ge     | 1 |
| trf_7_1 | Bra000 | 11  |    |   |    |      |      | UCCGUUAUCGUCCAGC | UAACCGGAGGACGAUA  | Cleava |   |
| 08      | 529    | 2.5 | .2 | 1 | 21 | 984  | 1004 | GGUUA            | AUGGA             | ge     | 1 |
| trf_7_1 | Bra032 | 22  |    |   |    |      |      | UCCGUUAUCGUCCAGC | GACGGCUUGACGAUGA  | Cleava |   |
| 08      | 111    | 3   | .4 | 1 | 20 | 727  | 746  | GGUU             | CGGA              | ge     | 1 |
| trf_7_1 | Bra000 | 11  |    |   |    |      |      | UCCGUUAUCGUCCAGC | UAACCGGAGGACGAUA  | Cleava |   |
| 09      | 529    | 2.5 | .2 | 1 | 21 | 984  | 1004 | GGUUA            | AUGGA             | ge     | 1 |
| trf_7_1 | Bra032 | 22  |    |   |    |      |      | UCCGUUAUCGUCCAGC | GACGGCUUGACGAUGA  | Cleava |   |
| 09      | 111    | 3   | .4 | 1 | 20 | 727  | 746  | GGUU             | CGGA              | ge     | 1 |
| trf_7_1 | Bra000 | 11  |    |   |    |      |      | UCCGUUAUCGUCCAGC | AACCGGAGGACGAUAA  | Cleava |   |
| 10      | 529    | 2.5 | .2 | 1 | 20 | 985  | 1004 | GGUU             | UGGA              | ge     | 1 |
| trf_7_1 | Bra032 | 22  |    |   |    |      |      | UCCGUUAUCGUCCAGC | GACGGCUUGACGAUGA  | Cleava |   |
| 10      | 111    | 3   | .4 | 1 | 20 | 727  | 746  | GGUU             | CGGA              | ge     | 1 |
| trf_7_1 | Bra000 | 11  |    |   |    |      |      | UCCGUUAUCGUCCAGC | UAACCGGAGGACGAUA  | Cleava |   |
| 11      | 529    | 2.5 | .2 | 1 | 21 | 984  | 1004 | GGUUA            | AUGGA             | ge     | 1 |
| trf_7_1 | Bra032 | 22  |    |   |    |      |      | UCCGUUAUCGUCCAGC | GACGGCUUGACGAUGA  | Cleava |   |
| 11      | 111    | 3   | .4 | 1 | 20 | 727  | 746  | GGUU             | CGGA              | ge     | 1 |
| trf_7_1 | Bra000 | 11  |    |   |    |      |      | UCCGUUAUCGUCCAGC | UAACCGGAGGACGAUA  | Cleava |   |
| 13      | 529    | 2.5 | .2 | 1 | 21 | 984  | 1004 | GGUUA            | AUGGA             | ge     | 1 |
| trf_7_1 | Bra032 | 22  |    |   |    |      |      | UCCGUUAUCGUCCAGC | GACGGCUUGACGAUGA  | Cleava |   |
| 13      | 111    | 3   | .4 | 1 | 20 | 727  | 746  | GGUU             | CGGA              | ge     | 1 |
| trf_7_1 | Bra000 | 11  |    |   |    |      |      | UCCGUUAUCGUCCAGC | UAACCGGAGGACGAUA  | Cleava |   |
| 15      | 529    | 2.5 | .2 | 1 | 21 | 984  | 1004 | GGUUA            | AUGGA             | ge     | 1 |

|         |        |    |    |   |    |      |      |                  |                   |        |   |
|---------|--------|----|----|---|----|------|------|------------------|-------------------|--------|---|
| trf_7_1 | Bra032 | 22 |    |   |    |      |      | UCCGUUAUCGUCCAGC | GACGGCUUGACGAUGA  | Cleava |   |
| 15      | 111    | 3  | .4 | 1 | 20 | 727  | 746  | GGUU             | CGGA              | ge     | 1 |
| trf_7_1 | Bra009 | 14 |    |   |    |      |      | GGGGAUGUAGCUCAGA | UUAUCAUCUGGGCUUC  | Cleava |   |
| 16      | 876    | 3  | .9 | 1 | 22 | 16   | 37   | UGGUAG           | GUCCUC            | ge     | 1 |
| trf_7_1 | Bra016 | 10 |    |   |    |      |      | GGGGAUGUAGCUCAGA | UUAUCAUCUGAGCUUC  | Cleava |   |
| 16      | 141    | 3  | .4 | 1 | 22 | 3031 | 3052 | UGGUAG           | GUUCUC            | ge     | 1 |
| trf_7_1 | Bra036 | 20 |    |   |    |      |      | GGGGAUGUAGCUCAGA | UCGACUGGCUGAGCUA  | Cleava |   |
| 16      | 771    | 3  | .2 | 1 | 23 | 5375 | 5397 | UGGUAGA          | CAUUCCU           | ge     | 1 |
| trf_7_1 | Bra018 | 8. |    |   |    |      |      | GGGGAUGUAGCUCAGA | GCCACCUCAGCUACAUC | Cleava |   |
| 16      | 620    | 3  | 3  | 1 | 20 | 7    | 26   | UGGU             | CUC               | ge     | 1 |
| trf_7_1 | Bra036 | 20 |    |   |    |      |      | GGGGAUGUAGCUCAGA | CUCGACUGGCUGAGCU  | Cleava |   |
| 24      | 771    | 3  | .2 | 1 | 24 | 5374 | 5397 | UGGUAGAG         | ACAUUCCU          | ge     | 1 |
| trf_7_1 | Bra009 | 14 |    |   |    |      |      | GGGGAUGUAGCUCAGA | CGUUAUCAUCUGGGCU  | Cleava |   |
| 24      | 876    | 3  | .9 | 1 | 24 | 14   | 37   | UGGUAGAG         | UCGUCCUC          | ge     | 1 |
| trf_7_1 | Bra016 | 10 |    |   |    |      |      | GGGGAUGUAGCUCAGA | CAUUAUCAUCUGAGCU  | Cleava |   |
| 24      | 141    | 3  | .4 | 1 | 24 | 3029 | 3052 | UGGUAGAG         | UCGUUCUC          | ge     | 1 |
| trf_7_1 | Bra018 | 8. |    |   |    |      |      | GGGGAUGUAGCUCAGA | GCCACCUCAGCUACAUC | Cleava |   |
| 24      | 620    | 3  | 3  | 1 | 20 | 7    | 26   | UGGU             | CUC               | ge     | 1 |
| trf_7_1 | Bra009 | 14 |    |   |    |      |      | GGGGAUGUAGCUCAGA | UUAUCAUCUGGGCUUC  | Cleava |   |
| 25      | 876    | 3  | .9 | 1 | 22 | 16   | 37   | UGGUAG           | GUCCUC            | ge     | 1 |
| trf_7_1 | Bra016 | 10 |    |   |    |      |      | GGGGAUGUAGCUCAGA | UUAUCAUCUGAGCUUC  | Cleava |   |
| 25      | 141    | 3  | .4 | 1 | 22 | 3031 | 3052 | UGGUAG           | GUUCUC            | ge     | 1 |
| trf_7_1 | Bra036 | 20 |    |   |    |      |      | GGGGAUGUAGCUCAGA | UCGACUGGCUGAGCUA  | Cleava |   |
| 25      | 771    | 3  | .2 | 1 | 23 | 5375 | 5397 | UGGUAGA          | CAUUCCU           | ge     | 1 |
| trf_7_1 | Bra018 | 8. |    |   |    |      |      | GGGGAUGUAGCUCAGA | GCCACCUCAGCUACAUC | Cleava |   |
| 25      | 620    | 3  | 3  | 1 | 20 | 7    | 26   | UGGU             | CUC               | ge     | 1 |
| trf_7_1 | Bra013 | 16 |    |   |    |      |      | UCCGUUGUCGUCCAGC | UAACCGAUGGAUGUCA  | Cleava |   |
| 31      | 584    | 3  | .4 | 1 | 21 | 890  | 910  | GGUUA            | AUGGA             | ge     | 1 |
| trf_7_1 | Bra000 | 11 |    |   |    |      |      | UCCGUUGUCGUCCAGC | UAACCGGAGGACGAUA  | Cleava |   |
| 31      | 529    | 3  | .2 | 1 | 21 | 984  | 1004 | GGUUA            | AUGGA             | ge     | 1 |
| trf_7_1 | Bra013 | 16 |    |   |    |      |      | UCCGUUGUCGUCCAGC | UAUGAUAAACCGAUGGA | Cleava |   |
| 32      | 584    | 3  | .4 | 1 | 26 | 885  | 910  | GGUUAGGAUA       | UGUCA AUGGA       | ge     | 1 |
| trf_7_1 | Bra000 | 11 |    |   |    |      |      | UCCGUUGUCGUCCAGC | UAACCGGAGGACGAUA  | Cleava |   |
| 32      | 529    | 3  | .2 | 1 | 21 | 984  | 1004 | GGUUA            | AUGGA             | ge     | 1 |

|         |        |    |    |   |    |      |      |                  |                   |        |   |
|---------|--------|----|----|---|----|------|------|------------------|-------------------|--------|---|
| trf_7_1 | Bra013 | 16 |    |   |    |      |      | UCCGUUGUCGUCCAGC | AUGAUAACCGAUGGAU  | Cleava |   |
| 33      | 584    | 3  | .4 | 1 | 25 | 886  | 910  | GGUUAGGAU        | GUCAAUGGA         | ge     | 1 |
| trf_7_1 | Bra000 | 11 |    |   |    |      |      | UCCGUUGUCGUCCAGC | UAACCGGAGGACGAUA  | Cleava |   |
| 33      | 529    | 3  | .2 | 1 | 21 | 984  | 1004 | GGUUA            | AUGGA             | ge     | 1 |
| trf_7_1 | Bra013 | 16 |    |   |    |      |      | UCCGUUGUCGUCCAGC | AACCGAUGGAUGUCA   | Cleava |   |
| 34      | 584    | 3  | .4 | 1 | 20 | 891  | 910  | GGUU             | UGGA              | ge     | 1 |
| trf_7_1 | Bra000 | 11 |    |   |    |      |      | UCCGUUGUCGUCCAGC | AACCGGAGGACGAUAA  | Cleava |   |
| 34      | 529    | 3  | .2 | 1 | 20 | 985  | 1004 | GGUU             | UGGA              | ge     | 1 |
| trf_7_1 | Bra013 | 16 |    |   |    |      |      | UCCGUUGUCGUCCAGC | UAUGAUAACCGAUGGA  | Cleava |   |
| 35      | 584    | 3  | .4 | 1 | 26 | 885  | 910  | GGUUAGGAUA       | UGUCA AUGGA       | ge     | 1 |
| trf_7_1 | Bra000 | 11 |    |   |    |      |      | UCCGUUGUCGUCCAGC | UAACCGGAGGACGAUA  | Cleava |   |
| 35      | 529    | 3  | .2 | 1 | 21 | 984  | 1004 | GGUUA            | AUGGA             | ge     | 1 |
| trf_7_1 | Bra013 | 16 |    |   |    |      |      | UCCGUUGUCGUCCAGC | UAACCGAUGGAUGUCA  | Cleava |   |
| 37      | 584    | 3  | .4 | 1 | 21 | 890  | 910  | GGUUA            | AUGGA             | ge     | 1 |
| trf_7_1 | Bra000 | 11 |    |   |    |      |      | UCCGUUGUCGUCCAGC | UAACCGGAGGACGAUA  | Cleava |   |
| 37      | 529    | 3  | .2 | 1 | 21 | 984  | 1004 | GGUUA            | AUGGA             | ge     | 1 |
| trf_7_1 | Bra009 | 14 |    |   |    |      |      | GGGGAUGUAGCUCAGA | UUAUCAUCUGGGCUUC  | Cleava |   |
| 38      | 876    | 3  | .9 | 1 | 22 | 16   | 37   | UGGUAG           | GUCCUC            | ge     | 1 |
| trf_7_1 | Bra016 | 10 |    |   |    |      |      | GGGGAUGUAGCUCAGA | UUAUCAUCUGAGCUUC  | Cleava |   |
| 38      | 141    | 3  | .4 | 1 | 22 | 3031 | 3052 | UGGUAG           | GUUCUC            | ge     | 1 |
| trf_7_1 | Bra036 | 20 |    |   |    |      |      | GGGGAUGUAGCUCAGA | UCGACUGGCUGAGCUA  | Cleava |   |
| 38      | 771    | 3  | .2 | 1 | 23 | 5375 | 5397 | UGGUAGA          | CAUUCCU           | ge     | 1 |
| trf_7_1 | Bra018 | 8. |    |   |    |      |      | GGGGAUGUAGCUCAGA | GCCACCUCAGCUACAUC | Cleava |   |
| 38      | 620    | 3  | 3  | 1 | 20 | 7    | 26   | UGGU             | CUC               | ge     | 1 |
| trf_7_1 | Bra009 | 14 |    |   |    |      |      | GGGGAUGUAGCUCAGA | UUAUCAUCUGGGCUUC  | Cleava |   |
| 39      | 876    | 3  | .9 | 1 | 22 | 16   | 37   | UGGUAG           | GUCCUC            | ge     | 1 |
| trf_7_1 | Bra016 | 10 |    |   |    |      |      | GGGGAUGUAGCUCAGA | UUAUCAUCUGAGCUUC  | Cleava |   |
| 39      | 141    | 3  | .4 | 1 | 22 | 3031 | 3052 | UGGUAG           | GUUCUC            | ge     | 1 |
| trf_7_1 | Bra036 | 20 |    |   |    |      |      | GGGGAUGUAGCUCAGA | UCGACUGGCUGAGCUA  | Cleava |   |
| 39      | 771    | 3  | .2 | 1 | 23 | 5375 | 5397 | UGGUAGA          | CAUUCCU           | ge     | 1 |
| trf_7_1 | Bra018 | 8. |    |   |    |      |      | GGGGAUGUAGCUCAGA | GCCACCUCAGCUACAUC | Cleava |   |
| 39      | 620    | 3  | 3  | 1 | 20 | 7    | 26   | UGGU             | CUC               | ge     | 1 |
| trf_7_1 | Bra013 | 16 |    |   |    |      |      | UCCGUUGUCGUCCAGC | UAACCGAUGGAUGUCA  | Cleava |   |
| 40      | 584    | 3  | .4 | 1 | 21 | 890  | 910  | GGUUA            | AUGGA             | ge     | 1 |

|         |        |     |    |   |    |      |      |                  |                  |        |   |
|---------|--------|-----|----|---|----|------|------|------------------|------------------|--------|---|
| trf_7_1 | Bra000 | 11  |    |   |    |      |      | UCCGUUGUCGUCCAGC | UAACCGGAGGACGAUA | Cleava |   |
| 40      | 529    | 3   | .2 | 1 | 21 | 984  | 1004 | GGUUA            | AUGGA            | ge     | 1 |
| trf_7_1 | Bra013 | 16  |    |   |    |      |      | UCCGUUGUCGUCCAGC | AACCGAUGGAUGUCA  | Cleava |   |
| 41      | 584    | 3   | .4 | 1 | 20 | 891  | 910  | GGUU             | UGGA             | ge     | 1 |
| trf_7_1 | Bra000 | 11  |    |   |    |      |      | UCCGUUGUCGUCCAGC | AACCGGAGGACGAUAA | Cleava |   |
| 41      | 529    | 3   | .2 | 1 | 20 | 985  | 1004 | GGUU             | UGGA             | ge     | 1 |
| trf_7_1 | Bra013 | 16  |    |   |    |      |      | UCCGUUGUCGUCCAGC | AUGAUAACCGAUGGAU | Cleava |   |
| 42      | 584    | 3   | .4 | 1 | 25 | 886  | 910  | GGUUAGGAU        | GUCAAUGGA        | ge     | 1 |
| trf_7_1 | Bra000 | 11  |    |   |    |      |      | UCCGUUGUCGUCCAGC | UAACCGGAGGACGAUA | Cleava |   |
| 42      | 529    | 3   | .2 | 1 | 21 | 984  | 1004 | GGUUA            | AUGGA            | ge     | 1 |
| trf_7_1 | Bra013 | 16  |    |   |    |      |      | UCCGUUGUCGUCCAGC | UAUGAUAACCGAUGGA | Cleava |   |
| 43      | 584    | 3   | .4 | 1 | 26 | 885  | 910  | GGUUAGGAUA       | UGCAAUGGA        | ge     | 1 |
| trf_7_1 | Bra000 | 11  |    |   |    |      |      | UCCGUUGUCGUCCAGC | UAACCGGAGGACGAUA | Cleava |   |
| 43      | 529    | 3   | .2 | 1 | 21 | 984  | 1004 | GGUUA            | AUGGA            | ge     | 1 |
| trf_7_1 | Bra013 | 16  |    |   |    |      |      | UCCGUUGUCGUCCAGC | UAACCGAUGGAUGUCA | Cleava |   |
| 44      | 584    | 3   | .4 | 1 | 21 | 890  | 910  | GGUUA            | AUGGA            | ge     | 1 |
| trf_7_1 | Bra000 | 11  |    |   |    |      |      | UCCGUUGUCGUCCAGC | UAACCGGAGGACGAUA | Cleava |   |
| 44      | 529    | 3   | .2 | 1 | 21 | 984  | 1004 | GGUUA            | AUGGA            | ge     | 1 |
| trf_7_1 | Bra013 | 16  |    |   |    |      |      | UCCGUUGUCGUCCAGC | UAACCGAUGGAUGUCA | Cleava |   |
| 45      | 584    | 3   | .4 | 1 | 21 | 890  | 910  | GGUUA            | AUGGA            | ge     | 1 |
| trf_7_1 | Bra000 | 11  |    |   |    |      |      | UCCGUUGUCGUCCAGC | UAACCGGAGGACGAUA | Cleava |   |
| 45      | 529    | 3   | .2 | 1 | 21 | 984  | 1004 | GGUUA            | AUGGA            | ge     | 1 |
| trf_7_1 | Bra014 | 17  |    |   |    |      |      | GGGGAUGUAGCUCAUA | UGUAUUUAUUAGCU   | Cleava |   |
| 46      | 507    | 3   | .0 | 1 | 23 | 541  | 563  | UGGUAGA          | AUAUCUCC         | ge     | 1 |
| trf_7_1 | Bra016 | 20  |    |   |    |      |      | UCCGUCGUAGUCUAGC | CUGAAGAAGCUAGGCU | Cleava |   |
| 47      | 601    | 3   | .8 | 1 | 24 | 415  | 438  | UGGUUAGG         | GCGACGGA         | ge     | 1 |
| trf_7_1 | Bra016 | 20  |    |   |    |      |      | UCCGUCGUAGUCUAGC | CUGAAGAAGCUAGGCU | Cleava |   |
| 48      | 601    | 3   | .8 | 1 | 24 | 415  | 438  | UGGUUAGG         | GCGACGGA         | ge     | 1 |
| trf_7_1 | Bra016 | 20  |    |   |    |      |      | UCCGUCGUAGUCUAGC | CUGAAGAAGCUAGGCU | Cleava |   |
| 50      | 601    | 3   | .8 | 1 | 24 | 415  | 438  | UGGUUAGG         | GCGACGGA         | ge     | 1 |
| trf_7_1 | Bra005 | 12  |    |   |    |      |      | GUGGCUGUAGUUUAG  | CUCACCGCUGAACUAU | Cleava |   |
| 51      | 511    | 2.5 | .8 | 1 | 22 | 1113 | 1134 | UGGUGAG          | GGCUAC           | ge     | 1 |
| trf_7_1 | Bra035 | 17  |    |   |    |      |      | GUGGCUGUAGUUUAG  | UAUUCAUCUCUAGGCU | Cleava |   |
| 51      | 454    | 3   | .9 | 1 | 24 | 1241 | 1264 | UGGUGAGAA        | ACAGCCAU         | ge     | 1 |

|         |        |    |    |   |    |      |      |                  |                   |        |   |
|---------|--------|----|----|---|----|------|------|------------------|-------------------|--------|---|
| trf_7_1 | Bra009 | 12 |    |   |    |      |      | GUGGCUGUAGUUUAG  | CAACAUUGAGCUACAG  | Cleava |   |
| 51      | 047    | 3  | .1 | 1 | 20 | 243  | 262  | UGGUG            | CCAU              | ge     | 1 |
| trf_7_1 | Bra009 | 14 |    |   |    |      |      | GGGGAUGUAGCUCAGA | UUAUCAUCUGGGCUUC  | Cleava |   |
| 52      | 876    | 3  | .9 | 1 | 22 | 16   | 37   | UGGUAG           | GUCCUC            | ge     | 1 |
| trf_7_1 | Bra016 | 10 |    |   |    |      |      | GGGGAUGUAGCUCAGA | UUAUCAUCUGAGCUUC  | Cleava |   |
| 52      | 141    | 3  | .4 | 1 | 22 | 3031 | 3052 | UGGUAG           | GUUCUC            | ge     | 1 |
| trf_7_1 | Bra036 | 20 |    |   |    |      |      | GGGGAUGUAGCUCAGA | UCGACUGGCUGAGCUA  | Cleava |   |
| 52      | 771    | 3  | .2 | 1 | 23 | 5375 | 5397 | UGGUAGA          | CAUUCCU           | ge     | 1 |
| trf_7_1 | Bra018 | 8. |    |   |    |      |      | GGGGAUGUAGCUCAGA | GCCACCUCAGCUACAUC | Cleava |   |
| 52      | 620    | 3  | 3  | 1 | 20 | 7    | 26   | UGGU             | CUC               | ge     | 1 |
| trf_7_1 | Bra009 | 14 |    |   |    |      |      | GGGGAUGUAGCUCAGA | UUAUCAUCUGGGCUUC  | Cleava |   |
| 55      | 876    | 3  | .9 | 1 | 22 | 16   | 37   | UGGUAG           | GUCCUC            | ge     | 1 |
| trf_7_1 | Bra016 | 10 |    |   |    |      |      | GGGGAUGUAGCUCAGA | UUAUCAUCUGAGCUUC  | Cleava |   |
| 55      | 141    | 3  | .4 | 1 | 22 | 3031 | 3052 | UGGUAG           | GUUCUC            | ge     | 1 |
| trf_7_1 | Bra036 | 20 |    |   |    |      |      | GGGGAUGUAGCUCAGA | UCGACUGGCUGAGCUA  | Cleava |   |
| 55      | 771    | 3  | .2 | 1 | 23 | 5375 | 5397 | UGGUAGA          | CAUUCCU           | ge     | 1 |
| trf_7_1 | Bra018 | 8. |    |   |    |      |      | GGGGAUGUAGCUCAGA | GCCACCUCAGCUACAUC | Cleava |   |
| 55      | 620    | 3  | 3  | 1 | 20 | 7    | 26   | UGGU             | CUC               | ge     | 1 |
| trf_7_1 | Bra009 | 14 |    |   |    |      |      | GGGGAUGUAGCUCAGA | UUAUCAUCUGGGCUUC  | Cleava |   |
| 56      | 876    | 3  | .9 | 1 | 22 | 16   | 37   | UGGUAG           | GUCCUC            | ge     | 1 |
| trf_7_1 | Bra016 | 10 |    |   |    |      |      | GGGGAUGUAGCUCAGA | UUAUCAUCUGAGCUUC  | Cleava |   |
| 56      | 141    | 3  | .4 | 1 | 22 | 3031 | 3052 | UGGUAG           | GUUCUC            | ge     | 1 |
| trf_7_1 | Bra036 | 20 |    |   |    |      |      | GGGGAUGUAGCUCAGA | UCGACUGGCUGAGCUA  | Cleava |   |
| 56      | 771    | 3  | .2 | 1 | 23 | 5375 | 5397 | UGGUAGA          | CAUUCCU           | ge     | 1 |
| trf_7_1 | Bra018 | 8. |    |   |    |      |      | GGGGAUGUAGCUCAGA | GCCACCUCAGCUACAUC | Cleava |   |
| 56      | 620    | 3  | 3  | 1 | 20 | 7    | 26   | UGGU             | CUC               | ge     | 1 |
| trf_7_1 | Bra009 | 14 |    |   |    |      |      | GGGGAUGUAGCUCAGA | UUAUCAUCUGGGCUUC  | Cleava |   |
| 57      | 876    | 3  | .9 | 1 | 22 | 16   | 37   | UGGUAG           | GUCCUC            | ge     | 1 |
| trf_7_1 | Bra016 | 10 |    |   |    |      |      | GGGGAUGUAGCUCAGA | UUAUCAUCUGAGCUUC  | Cleava |   |
| 57      | 141    | 3  | .4 | 1 | 22 | 3031 | 3052 | UGGUAG           | GUUCUC            | ge     | 1 |
| trf_7_1 | Bra036 | 20 |    |   |    |      |      | GGGGAUGUAGCUCAGA | UCGACUGGCUGAGCUA  | Cleava |   |
| 57      | 771    | 3  | .2 | 1 | 23 | 5375 | 5397 | UGGUAGA          | CAUUCCU           | ge     | 1 |
| trf_7_1 | Bra018 | 8. |    |   |    |      |      | GGGGAUGUAGCUCAGA | GCCACCUCAGCUACAUC | Cleava |   |
| 57      | 620    | 3  | 3  | 1 | 20 | 7    | 26   | UGGU             | CUC               | ge     | 1 |

|         |        |    |    |   |    |      |      |                  |                   |        |   |
|---------|--------|----|----|---|----|------|------|------------------|-------------------|--------|---|
| trf_7_1 | Bra009 | 14 |    |   |    |      |      | GGGGAUGUAGCUCAGA | UUAUCAUCUGGGCUUC  | Cleava |   |
| 60      | 876    | 3  | .9 | 1 | 22 | 16   | 37   | UGGUAG           | GUCCUC            | ge     | 1 |
| trf_7_1 | Bra016 | 10 |    |   |    |      |      | GGGGAUGUAGCUCAGA | UUAUCAUCUGAGCUUC  | Cleava |   |
| 60      | 141    | 3  | .4 | 1 | 22 | 3031 | 3052 | UGGUAG           | GUUCUC            | ge     | 1 |
| trf_7_1 | Bra036 | 20 |    |   |    |      |      | GGGGAUGUAGCUCAGA | UCGACUGGCUGAGCUA  | Cleava |   |
| 60      | 771    | 3  | .2 | 1 | 23 | 5375 | 5397 | UGGUAGA          | CAUUCCU           | ge     | 1 |
| trf_7_1 | Bra018 | 8. |    |   |    |      |      | GGGGAUGUAGCUCAGA | GCCACCUCAGCUACAUC | Cleava |   |
| 60      | 620    | 3  | 3  | 1 | 20 | 7    | 26   | UGGU             | CUC               | ge     | 1 |
| trf_7_1 | Bra009 | 14 |    |   |    |      |      | GGGGAUGUAGCUCAGA | UUAUCAUCUGGGCUUC  | Cleava |   |
| 62      | 876    | 3  | .9 | 1 | 22 | 16   | 37   | UGGUAG           | GUCCUC            | ge     | 1 |
| trf_7_1 | Bra016 | 10 |    |   |    |      |      | GGGGAUGUAGCUCAGA | UUAUCAUCUGAGCUUC  | Cleava |   |
| 62      | 141    | 3  | .4 | 1 | 22 | 3031 | 3052 | UGGUAG           | GUUCUC            | ge     | 1 |
| trf_7_1 | Bra036 | 20 |    |   |    |      |      | GGGGAUGUAGCUCAGA | UCGACUGGCUGAGCUA  | Cleava |   |
| 62      | 771    | 3  | .2 | 1 | 23 | 5375 | 5397 | UGGUAGA          | CAUUCCU           | ge     | 1 |
| trf_7_1 | Bra018 | 8. |    |   |    |      |      | GGGGAUGUAGCUCAGA | GCCACCUCAGCUACAUC | Cleava |   |
| 62      | 620    | 3  | 3  | 1 | 20 | 7    | 26   | UGGU             | CUC               | ge     | 1 |
| trf_7_1 | Bra024 | 7. |    |   |    |      |      | GGGGAUGUAGCUCAA  | UCCAACAUUUCGGUUA  | Cleava |   |
| 63      | 638    | 3  | 5  | 1 | 23 | 203  | 225  | UGGUAGA          | CAUCCCC           | ge     | 1 |
| trf_7_1 | Bra025 | 17 |    |   |    |      |      | GGGGAUGUAGCUCAA  | ACAAUUUGAGCUUCAU  | Cleava |   |
| 63      | 904    | 3  | .2 | 1 | 20 | 344  | 363  | UGGU             | CUUC              | ge     | 1 |
| trf_7_1 | Bra009 | 14 |    |   |    |      |      | GGGGAUGUAGCUCAGA | UUAUCAUCUGGGCUUC  | Cleava |   |
| 64      | 876    | 3  | .9 | 1 | 22 | 16   | 37   | UGGUAG           | GUCCUC            | ge     | 1 |
| trf_7_1 | Bra016 | 10 |    |   |    |      |      | GGGGAUGUAGCUCAGA | UUAUCAUCUGAGCUUC  | Cleava |   |
| 64      | 141    | 3  | .4 | 1 | 22 | 3031 | 3052 | UGGUAG           | GUUCUC            | ge     | 1 |
| trf_7_1 | Bra036 | 20 |    |   |    |      |      | GGGGAUGUAGCUCAGA | UCGACUGGCUGAGCUA  | Cleava |   |
| 64      | 771    | 3  | .2 | 1 | 23 | 5375 | 5397 | UGGUAGA          | CAUUCCU           | ge     | 1 |
| trf_7_1 | Bra018 | 8. |    |   |    |      |      | GGGGAUGUAGCUCAGA | GCCACCUCAGCUACAUC | Cleava |   |
| 64      | 620    | 3  | 3  | 1 | 20 | 7    | 26   | UGGU             | CUC               | ge     | 1 |
| trf_7_1 | Bra009 | 14 |    |   |    |      |      | GGGGAUGUAGCUCAGA | UUAUCAUCUGGGCUUC  | Cleava |   |
| 70      | 876    | 3  | .9 | 1 | 22 | 16   | 37   | UGGUAG           | GUCCUC            | ge     | 1 |
| trf_7_1 | Bra016 | 10 |    |   |    |      |      | GGGGAUGUAGCUCAGA | UUAUCAUCUGAGCUUC  | Cleava |   |
| 70      | 141    | 3  | .4 | 1 | 22 | 3031 | 3052 | UGGUAG           | GUUCUC            | ge     | 1 |
| trf_7_1 | Bra036 | 20 |    |   |    |      |      | GGGGAUGUAGCUCAGA | UCGACUGGCUGAGCUA  | Cleava |   |
| 70      | 771    | 3  | .2 | 1 | 23 | 5375 | 5397 | UGGUAGA          | CAUUCCU           | ge     | 1 |

|         |        |    |    |   |    |      |      |                  |                   |        |   |
|---------|--------|----|----|---|----|------|------|------------------|-------------------|--------|---|
| trf_7_1 | Bra018 | 8. |    |   |    |      |      | GGGGAUGUAGCUCAGA | GCCACCUCAGCUACAUC | Cleava |   |
| 70      | 620    | 3  | 3  | 1 | 20 | 7    | 26   | UGGU             | CUC               | ge     | 1 |
| trf_7_1 | Bra009 | 14 |    |   |    |      |      | GGGGAUGUAGCUCAGA | UUAUCAUCUGGGCUUC  | Cleava |   |
| 72      | 876    | 3  | .9 | 1 | 22 | 16   | 37   | UGGUAG           | GUCCUC            | ge     | 1 |
| trf_7_1 | Bra016 | 10 |    |   |    |      |      | GGGGAUGUAGCUCAGA | UUAUCAUCUGAGCUUC  | Cleava |   |
| 72      | 141    | 3  | .4 | 1 | 22 | 3031 | 3052 | UGGUAG           | GUUCUC            | ge     | 1 |
| trf_7_1 | Bra036 | 20 |    |   |    |      |      | GGGGAUGUAGCUCAGA | UCGACUGGCUGAGCUA  | Cleava |   |
| 72      | 771    | 3  | .2 | 1 | 23 | 5375 | 5397 | UGGUAGA          | CAUUCCU           | ge     | 1 |
| trf_7_1 | Bra018 | 8. |    |   |    |      |      | GGGGAUGUAGCUCAGA | GCCACCUCAGCUACAUC | Cleava |   |
| 72      | 620    | 3  | 3  | 1 | 20 | 7    | 26   | UGGU             | CUC               | ge     | 1 |
| trf_7_1 | Bra036 | 20 |    |   |    |      |      | GGGGAUGUAGCUCAGA | CUCGACUGGCUGAGCU  | Cleava |   |
| 73      | 771    | 3  | .2 | 1 | 24 | 5374 | 5397 | UGGUAGAG         | ACAUUCCU          | ge     | 1 |
| trf_7_1 | Bra009 | 14 |    |   |    |      |      | GGGGAUGUAGCUCAGA | CGUUAUCAUCUGGGCU  | Cleava |   |
| 73      | 876    | 3  | .9 | 1 | 24 | 14   | 37   | UGGUAGAG         | UCGUCCUC          | ge     | 1 |
| trf_7_1 | Bra016 | 10 |    |   |    |      |      | GGGGAUGUAGCUCAGA | CAUUAUCAUCUGAGCU  | Cleava |   |
| 73      | 141    | 3  | .4 | 1 | 24 | 3029 | 3052 | UGGUAGAG         | UCGUUCUC          | ge     | 1 |
| trf_7_1 | Bra018 | 8. |    |   |    |      |      | GGGGAUGUAGCUCAGA | GCCACCUCAGCUACAUC | Cleava |   |
| 73      | 620    | 3  | 3  | 1 | 20 | 7    | 26   | UGGU             | CUC               | ge     | 1 |
| trf_7_1 | Bra024 | 7. |    |   |    |      |      | GGGGAUGUAGCUCAA  | UCCAACAUUUCGGUUA  | Cleava |   |
| 74      | 638    | 3  | 5  | 1 | 23 | 203  | 225  | UGGUAGA          | CAUCCCC           | ge     | 1 |
| trf_7_1 | Bra025 | 17 |    |   |    |      |      | GGGGAUGUAGCUCAA  | ACAAUUUGAGCUUCAU  | Cleava |   |
| 74      | 904    | 3  | .2 | 1 | 20 | 344  | 363  | UGGU             | CUUC              | ge     | 1 |
| trf_7_1 | Bra009 | 14 |    |   |    |      |      | GGGGAUGUAGCUCAGA | UUAUCAUCUGGGCUUC  | Cleava |   |
| 75      | 876    | 3  | .9 | 1 | 22 | 16   | 37   | UGGUAG           | GUCCUC            | ge     | 1 |
| trf_7_1 | Bra016 | 10 |    |   |    |      |      | GGGGAUGUAGCUCAGA | UUAUCAUCUGAGCUUC  | Cleava |   |
| 75      | 141    | 3  | .4 | 1 | 22 | 3031 | 3052 | UGGUAG           | GUUCUC            | ge     | 1 |
| trf_7_1 | Bra036 | 20 |    |   |    |      |      | GGGGAUGUAGCUCAGA | UCGACUGGCUGAGCUA  | Cleava |   |
| 75      | 771    | 3  | .2 | 1 | 23 | 5375 | 5397 | UGGUAGA          | CAUUCCU           | ge     | 1 |
| trf_7_1 | Bra018 | 8. |    |   |    |      |      | GGGGAUGUAGCUCAGA | GCCACCUCAGCUACAUC | Cleava |   |
| 75      | 620    | 3  | 3  | 1 | 20 | 7    | 26   | UGGU             | CUC               | ge     | 1 |
| trf_7_1 | Bra009 | 14 |    |   |    |      |      | GGGGAUGUAGCUCAGA | UUAUCAUCUGGGCUUC  | Cleava |   |
| 76      | 876    | 3  | .9 | 1 | 22 | 16   | 37   | UGGUAG           | GUCCUC            | ge     | 1 |
| trf_7_1 | Bra016 | 10 |    |   |    |      |      | GGGGAUGUAGCUCAGA | UUAUCAUCUGAGCUUC  | Cleava |   |
| 76      | 141    | 3  | .4 | 1 | 22 | 3031 | 3052 | UGGUAG           | GUUCUC            | ge     | 1 |



|         |        |     |    |   |    |      |      |                  |                   |        |   |
|---------|--------|-----|----|---|----|------|------|------------------|-------------------|--------|---|
| trf_7_1 | Bra036 | 20  |    |   |    |      |      | GGGGAUGUAGCUCAGA | UCGACUGGCUGAGCUA  | Cleava |   |
| 76      | 771    | 3   | .2 | 1 | 23 | 5375 | 5397 | UGGUAGA          | CAUUCCU           | ge     | 1 |
| trf_7_1 | Bra018 | 8.  |    |   |    |      |      | GGGGAUGUAGCUCAGA | GCCACCUCAGCUACAUC | Cleava |   |
| 76      | 620    | 3   | 3  | 1 | 20 | 7    | 26   | UGGU             | CUC               | ge     | 1 |
| trf_7_1 | Bra014 | 17  |    |   |    |      |      | GGGGAUGUAGCUCAUA | UGUAUUAUUAUAGCU   | Cleava |   |
| 77      | 507    | 3   | .0 | 1 | 23 | 541  | 563  | UGGUAGA          | AUAUCUCC          | ge     | 1 |
| trf_7_1 | Bra009 | 14  |    |   |    |      |      | GGGGAUGUAGCUCAGA | UUAUCAUCUGGGCUUC  | Cleava |   |
| 78      | 876    | 3   | .9 | 1 | 22 | 16   | 37   | UGGUAG           | GUCCUC            | ge     | 1 |
| trf_7_1 | Bra016 | 10  |    |   |    |      |      | GGGGAUGUAGCUCAGA | UUAUCAUCUGAGCUUC  | Cleava |   |
| 78      | 141    | 3   | .4 | 1 | 22 | 3031 | 3052 | UGGUAG           | GUUCUC            | ge     | 1 |
| trf_7_1 | Bra036 | 20  |    |   |    |      |      | GGGGAUGUAGCUCAGA | UCGACUGGCUGAGCUA  | Cleava |   |
| 78      | 771    | 3   | .2 | 1 | 23 | 5375 | 5397 | UGGUAGA          | CAUUCCU           | ge     | 1 |
| trf_7_1 | Bra018 | 8.  |    |   |    |      |      | GGGGAUGUAGCUCAGA | GCCACCUCAGCUACAUC | Cleava |   |
| 78      | 620    | 3   | 3  | 1 | 20 | 7    | 26   | UGGU             | CUC               | ge     | 1 |
| trf_7_1 | Bra009 | 14  |    |   |    |      |      | GGGGAUGUAGCUCAGA | UUAUCAUCUGGGCUUC  | Cleava |   |
| 79      | 876    | 3   | .9 | 1 | 22 | 16   | 37   | UGGUAG           | GUCCUC            | ge     | 1 |
| trf_7_1 | Bra016 | 10  |    |   |    |      |      | GGGGAUGUAGCUCAGA | UUAUCAUCUGAGCUUC  | Cleava |   |
| 79      | 141    | 3   | .4 | 1 | 22 | 3031 | 3052 | UGGUAG           | GUUCUC            | ge     | 1 |
| trf_7_1 | Bra036 | 20  |    |   |    |      |      | GGGGAUGUAGCUCAGA | UCGACUGGCUGAGCUA  | Cleava |   |
| 79      | 771    | 3   | .2 | 1 | 23 | 5375 | 5397 | UGGUAGA          | CAUUCCU           | ge     | 1 |
| trf_7_1 | Bra018 | 8.  |    |   |    |      |      | GGGGAUGUAGCUCAGA | GCCACCUCAGCUACAUC | Cleava |   |
| 79      | 620    | 3   | 3  | 1 | 20 | 7    | 26   | UGGU             | CUC               | ge     | 1 |
| trf_7_1 | Bra009 | 14  |    |   |    |      |      | GGGGAUGUAGCUCAGA | UUAUCAUCUGGGCUUC  | Cleava |   |
| 80      | 876    | 3   | .9 | 1 | 22 | 16   | 37   | UGGUAG           | GUCCUC            | ge     | 1 |
| trf_7_1 | Bra016 | 10  |    |   |    |      |      | GGGGAUGUAGCUCAGA | UUAUCAUCUGAGCUUC  | Cleava |   |
| 80      | 141    | 3   | .4 | 1 | 22 | 3031 | 3052 | UGGUAG           | GUUCUC            | ge     | 1 |
| trf_7_1 | Bra036 | 20  |    |   |    |      |      | GGGGAUGUAGCUCAGA | UCGACUGGCUGAGCUA  | Cleava |   |
| 80      | 771    | 3   | .2 | 1 | 23 | 5375 | 5397 | UGGUAGA          | CAUUCCU           | ge     | 1 |
| trf_7_1 | Bra018 | 8.  |    |   |    |      |      | GGGGAUGUAGCUCAGA | GCCACCUCAGCUACAUC | Cleava |   |
| 80      | 620    | 3   | 3  | 1 | 20 | 7    | 26   | UGGU             | CUC               | ge     | 1 |
| trf_7_1 | Bra003 | 16  |    |   |    |      |      | GGGAUUGUAGUUCAA  | ACCAGUUGAAUUAACA  | Cleava |   |
| 81      | 753    | 1.5 | .2 | 1 | 20 | 284  | 303  | UUGGU            | UCCU              | ge     | 1 |
| trf_7_1 | Bra013 | 19  |    |   |    |      |      | GGGAUUGUAGUUCAA  | ACUAAUUGAACUAAGA  | Cleava |   |
| 81      | 336    | 3   | .5 | 1 | 20 | 267  | 286  | UUGGU            | UCUC              | ge     | 1 |

|         |        |     |    |   |    |     |     |                 |                  |        |   |
|---------|--------|-----|----|---|----|-----|-----|-----------------|------------------|--------|---|
| trf_7_1 | Bra021 | 23  |    |   |    |     |     | GGGAUUGUAGUUCAA | ACCAACUGAACUGCAA | Cleava |   |
| 81      | 314    | 3   | .2 | 1 | 20 | 234 | 253 | UUGGU           | UCUG             | ge     | 1 |
| trf_7_1 | Bra003 | 16  |    |   |    |     |     | GGGAUUGUAGUUCAA | ACCAGUUGAAUUACAA | Cleava |   |
| 82      | 753    | 2.5 | .2 | 1 | 20 | 284 | 303 | UUGGA           | UCCU             | ge     | 1 |
| trf_7_1 | Bra003 | 16  |    |   |    |     |     | GGGAUUGUAGUUCAA | ACCAGUUGAAUUACAA | Cleava |   |
| 83      | 753    | 1.5 | .2 | 1 | 20 | 284 | 303 | UUGGU           | UCCU             | ge     | 1 |
| trf_7_1 | Bra013 | 19  |    |   |    |     |     | GGGAUUGUAGUUCAA | ACUAAUUGAACUAAGA | Cleava |   |
| 83      | 336    | 3   | .5 | 1 | 20 | 267 | 286 | UUGGU           | UCUC             | ge     | 1 |
| trf_7_1 | Bra021 | 23  |    |   |    |     |     | GGGAUUGUAGUUCAA | ACCAACUGAACUGCAA | Cleava |   |
| 83      | 314    | 3   | .2 | 1 | 20 | 234 | 253 | UUGGU           | UCUG             | ge     | 1 |
| trf_7_1 | Bra003 | 16  |    |   |    |     |     | GGGAUUGUAGUUCAA | ACCAGUUGAAUUACAA | Cleava |   |
| 84      | 753    | 1.5 | .2 | 1 | 20 | 284 | 303 | UUGGU           | UCCU             | ge     | 1 |
| trf_7_1 | Bra013 | 19  |    |   |    |     |     | GGGAUUGUAGUUCAA | ACUAAUUGAACUAAGA | Cleava |   |
| 84      | 336    | 3   | .5 | 1 | 20 | 267 | 286 | UUGGU           | UCUC             | ge     | 1 |
| trf_7_1 | Bra021 | 23  |    |   |    |     |     | GGGAUUGUAGUUCAA | ACCAACUGAACUGCAA | Cleava |   |
| 84      | 314    | 3   | .2 | 1 | 20 | 234 | 253 | UUGGU           | UCUG             | ge     | 1 |
| trf_7_1 | Bra003 | 16  |    |   |    |     |     | GGGAUUGUAGUUCAA | ACCAGUUGAAUUACAA | Cleava |   |
| 85      | 753    | 2.5 | .2 | 1 | 20 | 284 | 303 | UCGGU           | UCCU             | ge     | 1 |
| trf_7_1 | Bra003 | 16  |    |   |    |     |     | GGGAUUGUAGUUCAA | ACCAGUUGAAUUACAA | Cleava |   |
| 87      | 753    | 2.5 | .2 | 1 | 20 | 284 | 303 | UUGGA           | UCCU             | ge     | 1 |
| trf_7_1 | Bra003 | 16  |    |   |    |     |     | GGGAUUGUAGUUCAA | ACCAGUUGAAUUACAA | Cleava |   |
| 88      | 753    | 2.5 | .2 | 1 | 20 | 284 | 303 | UCGGU           | UCCU             | ge     | 1 |
| trf_7_1 | Bra003 | 16  |    |   |    |     |     | GGGAUUGUAGUUCAA | ACCAGUUGAAUUACAA | Cleava |   |
| 89      | 753    | 1.5 | .2 | 1 | 20 | 284 | 303 | UUGGU           | UCCU             | ge     | 1 |
| trf_7_1 | Bra013 | 19  |    |   |    |     |     | GGGAUUGUAGUUCAA | ACUAAUUGAACUAAGA | Cleava |   |
| 89      | 336    | 3   | .5 | 1 | 20 | 267 | 286 | UUGGU           | UCUC             | ge     | 1 |
| trf_7_1 | Bra021 | 23  |    |   |    |     |     | GGGAUUGUAGUUCAA | ACCAACUGAACUGCAA | Cleava |   |
| 89      | 314    | 3   | .2 | 1 | 20 | 234 | 253 | UUGGU           | UCUG             | ge     | 1 |
| trf_7_1 | Bra003 | 16  |    |   |    |     |     | GGGAUUGUAGUUCAA | ACCAGUUGAAUUACAA | Cleava |   |
| 90      | 753    | 1.5 | .2 | 1 | 20 | 284 | 303 | UUGGU           | UCCU             | ge     | 1 |
| trf_7_1 | Bra013 | 19  |    |   |    |     |     | GGGAUUGUAGUUCAA | ACUAAUUGAACUAAGA | Cleava |   |
| 90      | 336    | 3   | .5 | 1 | 20 | 267 | 286 | UUGGU           | UCUC             | ge     | 1 |
| trf_7_1 | Bra021 | 23  |    |   |    |     |     | GGGAUUGUAGUUCAA | ACCAACUGAACUGCAA | Cleava |   |
| 90      | 314    | 3   | .2 | 1 | 20 | 234 | 253 | UUGGU           | UCUG             | ge     | 1 |

|         |        |     |    |   |    |      |      |                  |                  |        |   |
|---------|--------|-----|----|---|----|------|------|------------------|------------------|--------|---|
| trf_7_1 | Bra003 | 16  |    |   |    |      |      | GGGAUUGUAGUUCAA  | ACCAGUUGAAUUACAA | Cleava |   |
| 91      | 753    | 1.5 | .2 | 1 | 20 | 284  | 303  | UUGGU            | UCCU             | ge     | 1 |
| trf_7_1 | Bra013 | 19  |    |   |    |      |      | GGGAUUGUAGUUCAA  | ACUAAUUGAACUAAGA | Cleava |   |
| 91      | 336    | 3   | .5 | 1 | 20 | 267  | 286  | UUGGU            | UCUC             | ge     | 1 |
| trf_7_1 | Bra021 | 23  |    |   |    |      |      | GGGAUUGUAGUUCAA  | ACCAACUGAACUGCAA | Cleava |   |
| 91      | 314    | 3   | .2 | 1 | 20 | 234  | 253  | UUGGU            | UCUG             | ge     | 1 |
| trf_7_1 | Bra003 | 16  |    |   |    |      |      | GGGAUUGUAGUUCAA  | ACCAGUUGAAUUACAA | Cleava |   |
| 92      | 753    | 1.5 | .2 | 1 | 20 | 284  | 303  | UUGGU            | UCCU             | ge     | 1 |
| trf_7_1 | Bra013 | 19  |    |   |    |      |      | GGGAUUGUAGUUCAA  | ACUAAUUGAACUAAGA | Cleava |   |
| 92      | 336    | 3   | .5 | 1 | 20 | 267  | 286  | UUGGU            | UCUC             | ge     | 1 |
| trf_7_1 | Bra021 | 23  |    |   |    |      |      | GGGAUUGUAGUUCAA  | ACCAACUGAACUGCAA | Cleava |   |
| 92      | 314    | 3   | .2 | 1 | 20 | 234  | 253  | UUGGU            | UCUG             | ge     | 1 |
| trf_7_1 | Bra003 | 16  |    |   |    |      |      | GGGAUUGUAGUUCAA  | ACCAGUUGAAUUACAA | Cleava |   |
| 93      | 753    | 2.5 | .2 | 1 | 20 | 284  | 303  | UUGGA            | UCCU             | ge     | 1 |
| trf_7_1 | Bra003 | 16  |    |   |    |      |      | NGGAUUGUAGUUCAA  | ACCAGUUGAAUUACAA | Cleava |   |
| 94      | 753    | 2   | .2 | 1 | 20 | 284  | 303  | UUGGU            | UCCU             | ge     | 1 |
| trf_7_1 | Bra021 | 23  |    |   |    |      |      | NGGAUUGUAGUUCAA  | ACCAACUGAACUGCAA | Cleava |   |
| 94      | 314    | 3   | .2 | 1 | 20 | 234  | 253  | UUGGU            | UCUG             | ge     | 1 |
| trf_7_1 | Bra003 | 16  |    |   |    |      |      | GGGAUUGUAGUUCAA  | AACCAGUUGAAUUACA | Cleava |   |
| 95      | 753    | 2.5 | .2 | 1 | 21 | 283  | 303  | UUGGAU           | AUCCU            | ge     | 1 |
| trf_7_1 | Bra003 | 16  |    |   |    |      |      | GGGAUUGUAGUUCAA  | ACCAGUUGAAUUACAA | Cleava |   |
| 96      | 753    | 1.5 | .2 | 1 | 20 | 284  | 303  | UUGGU            | UCCU             | ge     | 1 |
| trf_7_1 | Bra013 | 19  |    |   |    |      |      | GGGAUUGUAGUUCAA  | ACUAAUUGAACUAAGA | Cleava |   |
| 96      | 336    | 3   | .5 | 1 | 20 | 267  | 286  | UUGGU            | UCUC             | ge     | 1 |
| trf_7_1 | Bra021 | 23  |    |   |    |      |      | GGGAUUGUAGUUCAA  | ACCAACUGAACUGCAA | Cleava |   |
| 96      | 314    | 3   | .2 | 1 | 20 | 234  | 253  | UUGGU            | UCUG             | ge     | 1 |
| trf_7_2 | Bra014 | 17  |    |   |    |      |      | GGGGAUGUAGCUCAUA | UGUAUUUAUUAGCU   | Cleava |   |
| 00      | 507    | 3   | .0 | 1 | 23 | 541  | 563  | UGGUAGA          | AUAUCUCC         | ge     | 1 |
| trf_7_2 | Bra014 | 17  |    |   |    |      |      | GGGGAUGUAGCUCAUA | UUGUAUUUAUUAGC   | Cleava |   |
| 01      | 507    | 3   | .0 | 1 | 24 | 540  | 563  | UGGUAGAG         | UAUAUCUCC        | ge     | 1 |
| trf_7_2 | Bra009 | 14  |    |   |    |      |      | GGGGAUGUAGCUCAGA | UUAUCAUCUGGGCUUC | Cleava |   |
| 02      | 876    | 3   | .9 | 1 | 22 | 16   | 37   | UGGUAG           | GUCCUC           | ge     | 1 |
| trf_7_2 | Bra016 | 10  |    |   |    |      |      | GGGGAUGUAGCUCAGA | UUAUCAUCUGAGCUUC | Cleava |   |
| 02      | 141    | 3   | .4 | 1 | 22 | 3031 | 3052 | UGGUAG           | GUUCUC           | ge     | 1 |

|         |        |    |    |   |    |      |      |                  |                   |        |   |
|---------|--------|----|----|---|----|------|------|------------------|-------------------|--------|---|
| trf_7_2 | Bra036 | 20 |    |   |    |      |      | GGGGAUGUAGCUCAGA | UCGACUGGCUGAGCUA  | Cleava |   |
| 02      | 771    | 3  | .2 | 1 | 23 | 5375 | 5397 | UGGUAGA          | CAUUCCU           | ge     | 1 |
| trf_7_2 | Bra018 | 8. |    |   |    |      |      | GGGGAUGUAGCUCAGA | GCCACCUCAGCUACAUC | Cleava |   |
| 02      | 620    | 3  | 3  | 1 | 20 | 7    | 26   | UGGU             | CUC               | ge     | 1 |
| trf_7_2 | Bra009 | 14 |    |   |    |      |      | GGGGAUGUAGCUCAGA | UUAUCAUCUGGGCUUC  | Cleava |   |
| 03      | 876    | 3  | .9 | 1 | 22 | 16   | 37   | UGGUAG           | GUCCUC            | ge     | 1 |
| trf_7_2 | Bra016 | 10 |    |   |    |      |      | GGGGAUGUAGCUCAGA | UUAUCAUCUGAGCUUC  | Cleava |   |
| 03      | 141    | 3  | .4 | 1 | 22 | 3031 | 3052 | UGGUAG           | GUUCUC            | ge     | 1 |
| trf_7_2 | Bra036 | 20 |    |   |    |      |      | GGGGAUGUAGCUCAGA | UCGACUGGCUGAGCUA  | Cleava |   |
| 03      | 771    | 3  | .2 | 1 | 23 | 5375 | 5397 | UGGUAGA          | CAUUCCU           | ge     | 1 |
| trf_7_2 | Bra018 | 8. |    |   |    |      |      | GGGGAUGUAGCUCAGA | GCCACCUCAGCUACAUC | Cleava |   |
| 03      | 620    | 3  | 3  | 1 | 20 | 7    | 26   | UGGU             | CUC               | ge     | 1 |
| trf_7_2 | Bra014 | 17 |    |   |    |      |      | GGGGAUGUAGCUCAUA | UGUAUUUAUUAGCU    | Cleava |   |
| 04      | 507    | 3  | .0 | 1 | 23 | 541  | 563  | UGGUAGA          | AUAUCUCC          | ge     | 1 |
| trf_7_2 | Bra014 | 17 |    |   |    |      |      | GGGGAUGUAGCUCAUA | UUGUAUUUAUUAGC    | Cleava |   |
| 05      | 507    | 3  | .0 | 1 | 24 | 540  | 563  | UGGUAGAG         | UAUAUCUCC         | ge     | 1 |
| trf_7_2 | Bra009 | 14 |    |   |    |      |      | GGGGAUGUAGCUCAGA | UUAUCAUCUGGGCUUC  | Cleava |   |
| 06      | 876    | 3  | .9 | 1 | 22 | 16   | 37   | UGGUAG           | GUCCUC            | ge     | 1 |
| trf_7_2 | Bra016 | 10 |    |   |    |      |      | GGGGAUGUAGCUCAGA | UUAUCAUCUGAGCUUC  | Cleava |   |
| 06      | 141    | 3  | .4 | 1 | 22 | 3031 | 3052 | UGGUAG           | GUUCUC            | ge     | 1 |
| trf_7_2 | Bra036 | 20 |    |   |    |      |      | GGGGAUGUAGCUCAGA | UCGACUGGCUGAGCUA  | Cleava |   |
| 06      | 771    | 3  | .2 | 1 | 23 | 5375 | 5397 | UGGUAGA          | CAUUCCU           | ge     | 1 |
| trf_7_2 | Bra018 | 8. |    |   |    |      |      | GGGGAUGUAGCUCAGA | GCCACCUCAGCUACAUC | Cleava |   |
| 06      | 620    | 3  | 3  | 1 | 20 | 7    | 26   | UGGU             | CUC               | ge     | 1 |
| trf_7_2 | Bra013 | 16 |    |   |    |      |      | UCCGUUGUCGUCCAGC | AUGAUAACCGAUGGAU  | Cleava |   |
| 11      | 584    | 3  | .4 | 1 | 25 | 886  | 910  | GGUUAGGAU        | GUCAAUGGA         | ge     | 1 |
| trf_7_2 | Bra000 | 11 |    |   |    |      |      | UCCGUUGUCGUCCAGC | UAACCGGAGGACGAUA  | Cleava |   |
| 11      | 529    | 3  | .2 | 1 | 21 | 984  | 1004 | GGUUA            | AUGGA             | ge     | 1 |
| trf_7_2 | Bra013 | 16 |    |   |    |      |      | UCCGUUGUCGUCCAGC | UAUGAUAACCGAUGGA  | Cleava |   |
| 12      | 584    | 3  | .4 | 1 | 26 | 885  | 910  | GGUUAGGAUA       | UGUCA AUGGA       | ge     | 1 |
| trf_7_2 | Bra000 | 11 |    |   |    |      |      | UCCGUUGUCGUCCAGC | UAACCGGAGGACGAUA  | Cleava |   |
| 12      | 529    | 3  | .2 | 1 | 21 | 984  | 1004 | GGUUA            | AUGGA             | ge     | 1 |
| trf_7_2 | Bra013 | 16 |    |   |    |      |      | UCCGUUGUCGUCCAGC | AACCGAUGGAUGUCAA  | Cleava |   |
| 14      | 584    | 3  | .4 | 1 | 20 | 891  | 910  | GGUU             | UGGA              | ge     | 1 |

|         |        |     |    |   |    |      |      |                  |                  |        |   |
|---------|--------|-----|----|---|----|------|------|------------------|------------------|--------|---|
| trf_7_2 | Bra000 | 11  |    |   |    |      |      | UCCGUUGUCGUCCAGC | AACCGGAGGACGAUAA | Cleava |   |
| 14      | 529    | 3   | .2 | 1 | 20 | 985  | 1004 | GGUU             | UGGA             | ge     | 1 |
| trf_7_2 | Bra013 | 16  |    |   |    |      |      | UCCGUUGUCGUCCAGC | UAACCGAUGGAUGUCA | Cleava |   |
| 16      | 584    | 3   | .4 | 1 | 21 | 890  | 910  | GGUUA            | AUGGA            | ge     | 1 |
| trf_7_2 | Bra000 | 11  |    |   |    |      |      | UCCGUUGUCGUCCAGC | UAACCGGAGGACGAUA | Cleava |   |
| 16      | 529    | 3   | .2 | 1 | 21 | 984  | 1004 | GGUUA            | AUGGA            | ge     | 1 |
| trf_7_2 | Bra013 | 16  |    |   |    |      |      | UCCGUUGUCGUCCAGC | UAUGAUAACCGAUGGA | Cleava |   |
| 17      | 584    | 3   | .4 | 1 | 26 | 885  | 910  | GGUUAGGAUA       | UGUCA AUGGA      | ge     | 1 |
| trf_7_2 | Bra000 | 11  |    |   |    |      |      | UCCGUUGUCGUCCAGC | UAACCGGAGGACGAUA | Cleava |   |
| 17      | 529    | 3   | .2 | 1 | 21 | 984  | 1004 | GGUUA            | AUGGA            | ge     | 1 |
| trf_7_2 | Bra016 | 20  |    |   |    |      |      | UCCGUCGUAGUCUAGC | CUGAAGAAGCUAGGCU | Cleava |   |
| 19      | 601    | 3   | .8 | 1 | 24 | 415  | 438  | UGGUUAGG         | GCGACGGA         | ge     | 1 |
| trf_7_2 | Bra016 | 20  |    |   |    |      |      | UCCGUCGUAGUCUAGC | CUGAAGAAGCUAGGCU | Cleava |   |
| 20      | 601    | 3   | .8 | 1 | 24 | 415  | 438  | UGGUUAGG         | GCGACGGA         | ge     | 1 |
| trf_7_2 | Bra024 | 7.  |    |   |    |      |      | GGGGAUGUAGCUCAAA | UCCAACAUUUCGGUUA | Cleava |   |
| 21      | 638    | 3   | 5  | 1 | 23 | 203  | 225  | UGGUAGA          | CAUCCCC          | ge     | 1 |
| trf_7_2 | Bra025 | 17  |    |   |    |      |      | GGGGAUGUAGCUCAAA | ACAAUUUGAGCUUCAU | Cleava |   |
| 21      | 904    | 3   | .2 | 1 | 20 | 344  | 363  | UGGU             | CUUC             | ge     | 1 |
| trf_7_2 | Bra016 | 20  |    |   |    |      |      | UCCGUCGUAGUCUAGC | CUGAAGAAGCUAGGCU | Cleava |   |
| 22      | 601    | 3   | .8 | 1 | 24 | 415  | 438  | UGGUUAGG         | GCGACGGA         | ge     | 1 |
| trf_7_2 | Bra016 | 20  |    |   |    |      |      | UCCGUCGUAGUCUAGC | AAGAAGCUAGGCUGCG | Cleava |   |
| 24      | 601    | 3   | .8 | 1 | 21 | 418  | 438  | UGGUU            | ACGGA            | ge     | 1 |
| trf_7_2 | Bra016 | 20  |    |   |    |      |      | UCCGUCGUAGUCUAGC | CUGAAGAAGCUAGGCU | Cleava |   |
| 25      | 601    | 3   | .8 | 1 | 24 | 415  | 438  | UGGUUAGG         | GCGACGGA         | ge     | 1 |
| trf_7_2 | Bra024 | 7.  |    |   |    |      |      | GGGGAUGUAGCUCAAA | UCCAACAUUUCGGUUA | Cleava |   |
| 43      | 638    | 3   | 5  | 1 | 23 | 203  | 225  | UGGUAGA          | CAUCCCC          | ge     | 1 |
| trf_7_2 | Bra025 | 17  |    |   |    |      |      | GGGGAUGUAGCUCAAA | ACAAUUUGAGCUUCAU | Cleava |   |
| 43      | 904    | 3   | .2 | 1 | 20 | 344  | 363  | UGGU             | CUUC             | ge     | 1 |
|         | Bra033 | 21  |    |   |    |      |      | GGGGAUGUAGCUCAAA | ACCCUUUGGGUAACAU | Transl |   |
| trf_7_1 | 370    | 3   | .6 | 1 | 20 | 4750 | 4769 | UGGU             | CCCC             | ation  | 1 |
|         | Bra033 | 21  |    |   |    |      |      | GGGGAUGUAGCUCAAA | ACCCUUUGGGUAACAU | Transl |   |
| trf_7_2 | 370    | 3   | .6 | 1 | 20 | 4750 | 4769 | UGGU             | CCCC             | ation  | 1 |
|         | Bra037 | 22  |    |   |    |      |      | UCCGUUAUCGUCCAGC | GUUGAAACCGCUGUCU | Transl |   |
| trf_7_3 | 748    | 2.5 | .8 | 1 | 25 | 561  | 585  | GGUUAGGAU        | GAUAACGGA        | ation  | 1 |

|         |        |     |    |   |    |      |      |                  |                   |        |   |
|---------|--------|-----|----|---|----|------|------|------------------|-------------------|--------|---|
| trf_7_4 | Bra037 | 22  |    |   |    |      |      | UCCGUUAUCGUCCAGC | AACCGCUGUCUGAUAA  | Transl |   |
|         | 748    | 2.5 | .8 | 1 | 20 | 566  | 585  | GGUU             | CGGA              | ation  | 1 |
| trf_7_5 | Bra037 | 22  |    |   |    |      |      | UCCGUUAUCGUCCAGC | GUUGAAACCGCUGUCU  | Transl |   |
|         | 748    | 2.5 | .8 | 1 | 25 | 561  | 585  | GGUUAGGAU        | GAUAACGGA         | ation  | 1 |
| trf_7_6 | Bra037 | 22  |    |   |    |      |      | UCCGUUAUCGUCCAGC | AACCGCUGUCUGAUAA  | Transl |   |
|         | 748    | 2.5 | .8 | 1 | 20 | 566  | 585  | GGUU             | CGGA              | ation  | 1 |
| trf_7_7 | Bra037 | 22  |    |   |    |      |      | UCCGUUAUCGUCCAGC | GUUGAAACCGCUGUCU  | Transl |   |
|         | 748    | 2.5 | .8 | 1 | 25 | 561  | 585  | GGUUAGGAU        | GAUAACGGA         | ation  | 1 |
| trf_7_8 | Bra037 | 22  |    |   |    |      |      | UCCGUUAUCGUCCAGC | AACCGCUGUCUGAUAA  | Transl |   |
|         | 748    | 2.5 | .8 | 1 | 20 | 566  | 585  | GGUU             | CGGA              | ation  | 1 |
| trf_7_9 | Bra037 | 22  |    |   |    |      |      | UCCGUUAUCGUCCAGC | AACCGCUGUCUGAUAA  | Transl |   |
|         | 748    | 2.5 | .8 | 1 | 20 | 566  | 585  | GGUU             | CGGA              | ation  | 1 |
| trf_7_1 | Bra037 | 14  |    |   |    |      |      | UCCGUUGUAGUCUAGC | UGACUGGUUAGGCCAC  | Transl |   |
| 2       | 499    | 3   | .7 | 1 | 22 | 174  | 195  | UGGUUA           | AACGGA            | ation  | 1 |
| trf_7_1 | Bra033 | 21  |    |   |    |      |      | GGGGAUGUAGCUCAAA | ACCCUUUGGGUAACAU  | Transl |   |
| 3       | 370    | 3   | .6 | 1 | 20 | 4750 | 4769 | UGGU             | CCCC              | ation  | 1 |
| trf_7_1 | Bra033 | 21  |    |   |    |      |      | GGGGAUGUAGCUCAAA | ACCCUUUGGGUAACAU  | Transl |   |
| 8       | 370    | 3   | .6 | 1 | 20 | 4750 | 4769 | UGGU             | CCCC              | ation  | 1 |
| trf_7_2 | Bra036 | 13  |    |   |    |      |      | GUGGCUGUAGUUUAG  | CAACACUAAAGUGCAG  | Transl |   |
| 5       | 328    | 3   | .8 | 1 | 20 | 708  | 727  | UGGUG            | CUAC              | ation  | 1 |
| trf_7_2 | Bra003 | 7.  |    |   |    |      |      | GUGGCUGUAGUUUAG  | UACCAUUAA-        | Transl |   |
| 5       | 191    | 3   | 6  | 1 | 20 | 27   | 45   | UGGUG            | CUACAGCCAC        | ation  | 1 |
| trf_7_3 | Bra033 | 21  |    |   |    |      |      | GGGGAUGUAGCUCAAA | ACCCUUUGGGUAACAU  | Transl |   |
| 7       | 370    | 3   | .6 | 1 | 20 | 4750 | 4769 | UGGU             | CCCC              | ation  | 1 |
| trf_7_4 | Bra020 | 15  |    |   |    |      |      | UCCGUUGUCGUCCAGC | CCAACUGCUGGAAGAC  | Transl |   |
| 8       | 153    | 2.5 | .4 | 1 | 22 | 1953 | 1974 | GGUUAG           | AAUGGG            | ation  | 1 |
| trf_7_4 | Bra012 | 18  |    |   |    |      |      | UCCGUUGUCGUCCAGC | AAUCGCUGAACCACAAC | Transl |   |
| 8       | 143    | 2.5 | .5 | 1 | 20 | 392  | 411  | GGUU             | GGA               | ation  | 1 |
| trf_7_4 | Bra037 | 22  |    |   |    |      |      | UCCGUUGUCGUCCAGC | AACCGCUGUCUGAUAA  | Transl |   |
| 8       | 748    | 3   | .8 | 1 | 20 | 566  | 585  | GGUU             | CGGA              | ation  | 1 |
| trf_7_4 | Bra020 | 15  |    |   |    |      |      | UCCGUUGUCGUCCAGC | CCAACUGCUGGAAGAC  | Transl |   |
| 9       | 153    | 2.5 | .4 | 1 | 22 | 1953 | 1974 | GGUUAG           | AAUGGG            | ation  | 1 |
| trf_7_4 | Bra012 | 18  |    |   |    |      |      | UCCGUUGUCGUCCAGC | AAUCGCUGAACCACAAC | Transl |   |
| 9       | 143    | 2.5 | .5 | 1 | 20 | 392  | 411  | GGUU             | GGA               | ation  | 1 |

|         |        |     |    |   |    |      |      |                  |                   |        |   |
|---------|--------|-----|----|---|----|------|------|------------------|-------------------|--------|---|
| trf_7_4 | Bra037 | 22  |    |   |    |      |      | UCCGUUGUCGUCCAGC | GUUGAAACCGCUGUCU  | Transl |   |
| 9       | 748    | 3   | .8 | 1 | 25 | 561  | 585  | GGUUAGGAU        | GAUAACGGA         | ation  | 1 |
| trf_7_5 | Bra020 | 15  |    |   |    |      |      | UCCGUUGUCGUCCAGC | CCAACUGCUGGAAGAC  | Transl |   |
| 0       | 153    | 2.5 | .4 | 1 | 22 | 1953 | 1974 | GGUUAG           | AAUGGG            | ation  | 1 |
| trf_7_5 | Bra012 | 18  |    |   |    |      |      | UCCGUUGUCGUCCAGC | AAUCGCUGAACCACAAC | Transl |   |
| 0       | 143    | 2.5 | .5 | 1 | 20 | 392  | 411  | GGUU             | GGA               | ation  | 1 |
| trf_7_5 | Bra037 | 22  |    |   |    |      |      | UCCGUUGUCGUCCAGC | GUUGAAACCGCUGUCU  | Transl |   |
| 0       | 748    | 3   | .8 | 1 | 25 | 561  | 585  | GGUUAGGAU        | GAUAACGGA         | ation  | 1 |
| trf_7_5 | Bra020 | 15  |    |   |    |      |      | UCCGUUGUCGUCCAGC | CCAACUGCUGGAAGAC  | Transl |   |
| 1       | 153    | 2.5 | .4 | 1 | 22 | 1953 | 1974 | GGUUAG           | AAUGGG            | ation  | 1 |
| trf_7_5 | Bra012 | 18  |    |   |    |      |      | UCCGUUGUCGUCCAGC | AAUCGCUGAACCACAAC | Transl |   |
| 1       | 143    | 2.5 | .5 | 1 | 20 | 392  | 411  | GGUU             | GGA               | ation  | 1 |
| trf_7_5 | Bra037 | 22  |    |   |    |      |      | UCCGUUGUCGUCCAGC | GUUGAAACCGCUGUCU  | Transl |   |
| 1       | 748    | 3   | .8 | 1 | 25 | 561  | 585  | GGUUAGGAU        | GAUAACGGA         | ation  | 1 |
| trf_7_5 | Bra020 | 15  |    |   |    |      |      | NCCGUUGUCGUCCAGC | CCAACUGCUGGAAGAC  | Transl |   |
| 2       | 153    | 3   | .4 | 1 | 22 | 1953 | 1974 | GGUUAG           | AAUGGG            | ation  | 1 |
| trf_7_5 | Bra020 | 15  |    |   |    |      |      | UCCGUUGUCGUCCAGC | AACUGCUGGAAGACAA  | Transl |   |
| 3       | 153    | 2.5 | .4 | 1 | 20 | 1955 | 1974 | GGUU             | UGGG              | ation  | 1 |
| trf_7_5 | Bra012 | 18  |    |   |    |      |      | UCCGUUGUCGUCCAGC | AAUCGCUGAACCACAAC | Transl |   |
| 3       | 143    | 2.5 | .5 | 1 | 20 | 392  | 411  | GGUU             | GGA               | ation  | 1 |
| trf_7_5 | Bra037 | 22  |    |   |    |      |      | UCCGUUGUCGUCCAGC | AACCGCUGUCUGAUAA  | Transl |   |
| 3       | 748    | 3   | .8 | 1 | 20 | 566  | 585  | GGUU             | CGGA              | ation  | 1 |
| trf_7_5 | Bra036 | 13  |    |   |    |      |      | GUGGCUGUAGUUUAG  | CAACACUAAAAGUGCAG | Transl |   |
| 8       | 328    | 3   | .8 | 1 | 20 | 708  | 727  | UGGUG            | CUAC              | ation  | 1 |
| trf_7_5 | Bra003 | 7.  |    |   |    |      |      | GUGGCUGUAGUUUAG  | UACCAUUAA-        | Transl |   |
| 8       | 191    | 3   | 6  | 1 | 20 | 27   | 45   | UGGUG            | CUACAGCCAC        | ation  | 1 |
| trf_7_6 | Bra033 | 21  |    |   |    |      |      | GGGGAUGUAGCUCAAA | ACCCUUUGGGUAACAU  | Transl |   |
| 9       | 370    | 3   | .6 | 1 | 20 | 4750 | 4769 | UGGU             | CCCC              | ation  | 1 |
| trf_7_7 | Bra033 | 21  |    |   |    |      |      | GGGGAUGUAGCUCAAA | CUGGACCCUUUGGGUA  | Transl |   |
| 1       | 370    | 3   | .6 | 1 | 24 | 4746 | 4769 | UGGUAGAG         | ACAUCCCC          | ation  | 1 |
| trf_7_7 | Bra033 | 21  |    |   |    |      |      | GGGGAUGUAGCUCAAA | ACCCUUUGGGUAACAU  | Transl |   |
| 2       | 370    | 3   | .6 | 1 | 20 | 4750 | 4769 | UGGU             | CCCC              | ation  | 1 |
| trf_7_7 | Bra033 | 21  |    |   |    |      |      | GGGGAUGUAGCUCAAA | ACCCUUUGGGUAACAU  | Transl |   |
| 5       | 370    | 3   | .6 | 1 | 20 | 4750 | 4769 | UGGU             | CCCC              | ation  | 1 |

|         |        |     |    |   |    |      |      |                  |                   |        |   |
|---------|--------|-----|----|---|----|------|------|------------------|-------------------|--------|---|
| trf_7_8 | Bra036 | 13  |    |   |    |      |      | GUGGCUGUAGUUUAG  | CAACACUAAAGUGCAG  | Transl |   |
| 2       | 328    | 3   | .8 | 1 | 20 | 708  | 727  | UGGUG            | CUAC              | ation  | 1 |
| trf_7_8 | Bra003 | 7.  |    |   |    |      |      | GUGGCUGUAGUUUAG  | UACCAUUA-         | Transl |   |
| 2       | 191    | 3   | 6  | 1 | 20 | 27   | 45   | UGGUG            | CUACAGCCAC        | ation  | 1 |
| trf_7_1 | Bra037 | 22  |    |   |    |      |      | UCCGUUAUCGUCCAGC | GUUGAAACCGCUGUCU  | Transl |   |
| 07      | 748    | 2.5 | .8 | 1 | 25 | 561  | 585  | GGUUAGGAU        | GAUAACGGA         | ation  | 1 |
| trf_7_1 | Bra037 | 22  |    |   |    |      |      | UCCGUUAUCGUCCAGC | GUUGAAACCGCUGUCU  | Transl |   |
| 08      | 748    | 2.5 | .8 | 1 | 25 | 561  | 585  | GGUUAGGAU        | GAUAACGGA         | ation  | 1 |
| trf_7_1 | Bra037 | 22  |    |   |    |      |      | UCCGUUAUCGUCCAGC | AACCGCUGUCUGAUAA  | Transl |   |
| 09      | 748    | 2.5 | .8 | 1 | 20 | 566  | 585  | GGUU             | CGGA              | ation  | 1 |
| trf_7_1 | Bra037 | 22  |    |   |    |      |      | UCCGUUAUCGUCCAGC | AACCGCUGUCUGAUAA  | Transl |   |
| 10      | 748    | 2.5 | .8 | 1 | 20 | 566  | 585  | GGUU             | CGGA              | ation  | 1 |
| trf_7_1 | Bra037 | 22  |    |   |    |      |      | UCCGUUAUCGUCCAGC | GUUGAAACCGCUGUCU  | Transl |   |
| 11      | 748    | 2.5 | .8 | 1 | 25 | 561  | 585  | GGUUAGGAU        | GAUAACGGA         | ation  | 1 |
| trf_7_1 | Bra037 | 22  |    |   |    |      |      | UCCGUUAUCGUCCAGC | AACCGCUGUCUGAUAA  | Transl |   |
| 13      | 748    | 2.5 | .8 | 1 | 20 | 566  | 585  | GGUU             | CGGA              | ation  | 1 |
| trf_7_1 | Bra037 | 22  |    |   |    |      |      | UCCGUUAUCGUCCAGC | AACCGCUGUCUGAUAA  | Transl |   |
| 15      | 748    | 2.5 | .8 | 1 | 20 | 566  | 585  | GGUU             | CGGA              | ation  | 1 |
| trf_7_1 | Bra020 | 15  |    |   |    |      |      | UCCGUUGUCGUCCAGC | CCAACUGCUGGAAGAC  | Transl |   |
| 31      | 153    | 2.5 | .4 | 1 | 22 | 1953 | 1974 | GGUUAG           | AAUGGG            | ation  | 1 |
| trf_7_1 | Bra012 | 18  |    |   |    |      |      | UCCGUUGUCGUCCAGC | AAUCGCUGAACCACAAC | Transl |   |
| 31      | 143    | 2.5 | .5 | 1 | 20 | 392  | 411  | GGUU             | GGA               | ation  | 1 |
| trf_7_1 | Bra037 | 22  |    |   |    |      |      | UCCGUUGUCGUCCAGC | AACCGCUGUCUGAUAA  | Transl |   |
| 31      | 748    | 3   | .8 | 1 | 20 | 566  | 585  | GGUU             | CGGA              | ation  | 1 |
| trf_7_1 | Bra020 | 15  |    |   |    |      |      | UCCGUUGUCGUCCAGC | CCAACUGCUGGAAGAC  | Transl |   |
| 32      | 153    | 2.5 | .4 | 1 | 22 | 1953 | 1974 | GGUUAG           | AAUGGG            | ation  | 1 |
| trf_7_1 | Bra012 | 18  |    |   |    |      |      | UCCGUUGUCGUCCAGC | AAUCGCUGAACCACAAC | Transl |   |
| 32      | 143    | 2.5 | .5 | 1 | 20 | 392  | 411  | GGUU             | GGA               | ation  | 1 |
| trf_7_1 | Bra037 | 22  |    |   |    |      |      | UCCGUUGUCGUCCAGC | GUUGAAACCGCUGUCU  | Transl |   |
| 32      | 748    | 3   | .8 | 1 | 25 | 561  | 585  | GGUUAGGAU        | GAUAACGGA         | ation  | 1 |
| trf_7_1 | Bra020 | 15  |    |   |    |      |      | UCCGUUGUCGUCCAGC | CCAACUGCUGGAAGAC  | Transl |   |
| 33      | 153    | 2.5 | .4 | 1 | 22 | 1953 | 1974 | GGUUAG           | AAUGGG            | ation  | 1 |
| trf_7_1 | Bra012 | 18  |    |   |    |      |      | UCCGUUGUCGUCCAGC | AAUCGCUGAACCACAAC | Transl |   |
| 33      | 143    | 2.5 | .5 | 1 | 20 | 392  | 411  | GGUU             | GGA               | ation  | 1 |



|         |        |     |    |   |    |      |      |                  |                   |        |   |
|---------|--------|-----|----|---|----|------|------|------------------|-------------------|--------|---|
| trf_7_1 | Bra037 | 22  |    |   |    |      |      | UCCGUUGUCGUCCAGC | GUUGAAACCGCUGUCU  | Transl |   |
| 33      | 748    | 3   | .8 | 1 | 25 | 561  | 585  | GGUUAGGAU        | GAUAACGGA         | ation  | 1 |
| trf_7_1 | Bra020 | 15  |    |   |    |      |      | UCCGUUGUCGUCCAGC | AACUGCUGGAAGACAA  | Transl |   |
| 34      | 153    | 2.5 | .4 | 1 | 20 | 1955 | 1974 | GGUU             | UGGG              | ation  | 1 |
| trf_7_1 | Bra012 | 18  |    |   |    |      |      | UCCGUUGUCGUCCAGC | AAUCGCUGAACCACAAC | Transl |   |
| 34      | 143    | 2.5 | .5 | 1 | 20 | 392  | 411  | GGUU             | GGA               | ation  | 1 |
| trf_7_1 | Bra037 | 22  |    |   |    |      |      | UCCGUUGUCGUCCAGC | AACCGCUGUCUGAUAA  | Transl |   |
| 34      | 748    | 3   | .8 | 1 | 20 | 566  | 585  | GGUU             | CGGA              | ation  | 1 |
| trf_7_1 | Bra020 | 15  |    |   |    |      |      | UCCGUUGUCGUCCAGC | CCAACUGCUGGAAGAC  | Transl |   |
| 35      | 153    | 2.5 | .4 | 1 | 22 | 1953 | 1974 | GGUUAG           | AAUGGG            | ation  | 1 |
| trf_7_1 | Bra012 | 18  |    |   |    |      |      | UCCGUUGUCGUCCAGC | AAUCGCUGAACCACAAC | Transl |   |
| 35      | 143    | 2.5 | .5 | 1 | 20 | 392  | 411  | GGUU             | GGA               | ation  | 1 |
| trf_7_1 | Bra037 | 22  |    |   |    |      |      | UCCGUUGUCGUCCAGC | GUUGAAACCGCUGUCU  | Transl |   |
| 35      | 748    | 3   | .8 | 1 | 25 | 561  | 585  | GGUUAGGAU        | GAUAACGGA         | ation  | 1 |
| trf_7_1 | Bra020 | 15  |    |   |    |      |      | UCCGUUGUCGUCCAGC | CCAACUGCUGGAAGAC  | Transl |   |
| 37      | 153    | 2.5 | .4 | 1 | 22 | 1953 | 1974 | GGUUAG           | AAUGGG            | ation  | 1 |
| trf_7_1 | Bra012 | 18  |    |   |    |      |      | UCCGUUGUCGUCCAGC | AAUCGCUGAACCACAAC | Transl |   |
| 37      | 143    | 2.5 | .5 | 1 | 20 | 392  | 411  | GGUU             | GGA               | ation  | 1 |
| trf_7_1 | Bra037 | 22  |    |   |    |      |      | UCCGUUGUCGUCCAGC | AACCGCUGUCUGAUAA  | Transl |   |
| 37      | 748    | 3   | .8 | 1 | 20 | 566  | 585  | GGUU             | CGGA              | ation  | 1 |
| trf_7_1 | Bra020 | 15  |    |   |    |      |      | UCCGUUGUCGUCCAGC | CCAACUGCUGGAAGAC  | Transl |   |
| 40      | 153    | 2.5 | .4 | 1 | 22 | 1953 | 1974 | GGUUAG           | AAUGGG            | ation  | 1 |
| trf_7_1 | Bra012 | 18  |    |   |    |      |      | UCCGUUGUCGUCCAGC | AAUCGCUGAACCACAAC | Transl |   |
| 40      | 143    | 2.5 | .5 | 1 | 20 | 392  | 411  | GGUU             | GGA               | ation  | 1 |
| trf_7_1 | Bra037 | 22  |    |   |    |      |      | UCCGUUGUCGUCCAGC | AACCGCUGUCUGAUAA  | Transl |   |
| 40      | 748    | 3   | .8 | 1 | 20 | 566  | 585  | GGUU             | CGGA              | ation  | 1 |
| trf_7_1 | Bra020 | 15  |    |   |    |      |      | UCCGUUGUCGUCCAGC | AACUGCUGGAAGACAA  | Transl |   |
| 41      | 153    | 2.5 | .4 | 1 | 20 | 1955 | 1974 | GGUU             | UGGG              | ation  | 1 |
| trf_7_1 | Bra012 | 18  |    |   |    |      |      | UCCGUUGUCGUCCAGC | AAUCGCUGAACCACAAC | Transl |   |
| 41      | 143    | 2.5 | .5 | 1 | 20 | 392  | 411  | GGUU             | GGA               | ation  | 1 |
| trf_7_1 | Bra037 | 22  |    |   |    |      |      | UCCGUUGUCGUCCAGC | AACCGCUGUCUGAUAA  | Transl |   |
| 41      | 748    | 3   | .8 | 1 | 20 | 566  | 585  | GGUU             | CGGA              | ation  | 1 |
| trf_7_1 | Bra020 | 15  |    |   |    |      |      | UCCGUUGUCGUCCAGC | CCAACUGCUGGAAGAC  | Transl |   |
| 42      | 153    | 2.5 | .4 | 1 | 22 | 1953 | 1974 | GGUUAG           | AAUGGG            | ation  | 1 |

|         |        |     |    |   |    |      |      |                  |                   |        |   |
|---------|--------|-----|----|---|----|------|------|------------------|-------------------|--------|---|
| trf_7_1 | Bra012 | 18  |    |   |    |      |      | UCCGUUGUCGUCCAGC | AAUCGCUGAACCACAAC | Transl |   |
| 42      | 143    | 2.5 | .5 | 1 | 20 | 392  | 411  | GGUU             | GGA               | ation  | 1 |
| trf_7_1 | Bra037 | 22  |    |   |    |      |      | UCCGUUGUCGUCCAGC | GUUGAAACCGCUGUCU  | Transl |   |
| 42      | 748    | 3   | .8 | 1 | 25 | 561  | 585  | GGUUAGGAU        | GAUAACGGA         | ation  | 1 |
| trf_7_1 | Bra020 | 15  |    |   |    |      |      | UCCGUUGUCGUCCAGC | CCAACUGCUGGAAGAC  | Transl |   |
| 43      | 153    | 2.5 | .4 | 1 | 22 | 1953 | 1974 | GGUUAG           | AAUGGG            | ation  | 1 |
| trf_7_1 | Bra012 | 18  |    |   |    |      |      | UCCGUUGUCGUCCAGC | AAUCGCUGAACCACAAC | Transl |   |
| 43      | 143    | 2.5 | .5 | 1 | 20 | 392  | 411  | GGUU             | GGA               | ation  | 1 |
| trf_7_1 | Bra037 | 22  |    |   |    |      |      | UCCGUUGUCGUCCAGC | GUUGAAACCGCUGUCU  | Transl |   |
| 43      | 748    | 3   | .8 | 1 | 25 | 561  | 585  | GGUUAGGAU        | GAUAACGGA         | ation  | 1 |
| trf_7_1 | Bra020 | 15  |    |   |    |      |      | UCCGUUGUCGUCCAGC | CCAACUGCUGGAAGAC  | Transl |   |
| 44      | 153    | 2.5 | .4 | 1 | 22 | 1953 | 1974 | GGUUAG           | AAUGGG            | ation  | 1 |
| trf_7_1 | Bra012 | 18  |    |   |    |      |      | UCCGUUGUCGUCCAGC | AAUCGCUGAACCACAAC | Transl |   |
| 44      | 143    | 2.5 | .5 | 1 | 20 | 392  | 411  | GGUU             | GGA               | ation  | 1 |
| trf_7_1 | Bra037 | 22  |    |   |    |      |      | UCCGUUGUCGUCCAGC | AACCGCUGUCUGAUAA  | Transl |   |
| 44      | 748    | 3   | .8 | 1 | 20 | 566  | 585  | GGUU             | CGGA              | ation  | 1 |
| trf_7_1 | Bra020 | 15  |    |   |    |      |      | UCCGUUGUCGUCCAGC | CCAACUGCUGGAAGAC  | Transl |   |
| 45      | 153    | 2.5 | .4 | 1 | 22 | 1953 | 1974 | GGUUAG           | AAUGGG            | ation  | 1 |
| trf_7_1 | Bra012 | 18  |    |   |    |      |      | UCCGUUGUCGUCCAGC | AAUCGCUGAACCACAAC | Transl |   |
| 45      | 143    | 2.5 | .5 | 1 | 20 | 392  | 411  | GGUU             | GGA               | ation  | 1 |
| trf_7_1 | Bra037 | 22  |    |   |    |      |      | UCCGUUGUCGUCCAGC | AACCGCUGUCUGAUAA  | Transl |   |
| 45      | 748    | 3   | .8 | 1 | 20 | 566  | 585  | GGUU             | CGGA              | ation  | 1 |
| trf_7_1 | Bra036 | 13  |    |   |    |      |      | GUGGCUGUAGUUUAG  | CAACACUAAAAGUGCAG | Transl |   |
| 51      | 328    | 3   | .8 | 1 | 20 | 708  | 727  | UGGUG            | CUAC              | ation  | 1 |
| trf_7_1 | Bra033 | 21  |    |   |    |      |      | GGGGAUGUAGCUCAAA | ACCCUUUGGGUAACAU  | Transl |   |
| 63      | 370    | 3   | .6 | 1 | 20 | 4750 | 4769 | UGGU             | CCCC              | ation  | 1 |
| trf_7_1 | Bra033 | 21  |    |   |    |      |      | GGGGAUGUAGCUCAAA | ACCCUUUGGGUAACAU  | Transl |   |
| 74      | 370    | 3   | .6 | 1 | 20 | 4750 | 4769 | UGGU             | CCCC              | ation  | 1 |
| trf_7_1 | Bra034 | 11  |    |   |    |      |      | GGGAUUGUAGUUCAA  | UCCAAAUGAGCAGCAA  | Transl |   |
| 82      | 753    | 3   | .6 | 1 | 20 | 443  | 462  | UUGGA            | UCCC              | ation  | 1 |
| trf_7_1 | Bra003 | 13  |    |   |    |      |      | GGGAUUGUAGUUCAA  | UCCAGUUAUUCUACAA  | Transl |   |
| 82      | 597    | 3   | .1 | 1 | 20 | 1508 | 1527 | UUGGA            | UUCC              | ation  | 1 |
| trf_7_1 | Bra023 | 12  |    |   |    |      |      | GGGAUUGUAGUUCAA  | UCCAAGUGAACAUCAA  | Transl |   |
| 82      | 172    | 3   | .4 | 1 | 20 | 614  | 633  | UUGGA            | UCCC              | ation  | 1 |

|         |        |     |    |   |    |      |      |                  |                   |        |   |
|---------|--------|-----|----|---|----|------|------|------------------|-------------------|--------|---|
| trf_7_1 | Bra033 | 10  |    |   |    |      |      | GGGAUUGUAGUUCAA  | ACCGAUUGAUCAGCAA  | Transl |   |
| 85      | 536    | 3   | .5 | 1 | 20 | 426  | 445  | UCGGU            | UUCC              | ation  | 1 |
| trf_7_1 | Bra023 | 12  |    |   |    |      |      | GGGAUUGUAGUUCAA  | UUCCAAGUGAACAUCA  | Transl |   |
| 87      | 172    | 3   | .4 | 1 | 21 | 613  | 633  | UUGGAA           | AUCCC             | ation  | 1 |
| trf_7_1 | Bra034 | 11  |    |   |    |      |      | GGGAUUGUAGUUCAA  | UCCAAAUGAGCAGCAA  | Transl |   |
| 87      | 753    | 3   | .6 | 1 | 20 | 443  | 462  | UUGGA            | UCCC              | ation  | 1 |
| trf_7_1 | Bra003 | 13  |    |   |    |      |      | GGGAUUGUAGUUCAA  | UCCAGUUAUCUACAA   | Transl |   |
| 87      | 597    | 3   | .1 | 1 | 20 | 1508 | 1527 | UUGGA            | UUCC              | ation  | 1 |
| trf_7_1 | Bra033 | 10  |    |   |    |      |      | GGGAUUGUAGUUCAA  | ACCGAUUGAUCAGCAA  | Transl |   |
| 88      | 536    | 3   | .5 | 1 | 20 | 426  | 445  | UCGGU            | UUCC              | ation  | 1 |
| trf_7_1 | Bra034 | 11  |    |   |    |      |      | GGGAUUGUAGUUCAA  | UCCAAAUGAGCAGCAA  | Transl |   |
| 93      | 753    | 3   | .6 | 1 | 20 | 443  | 462  | UUGGA            | UCCC              | ation  | 1 |
| trf_7_1 | Bra003 | 13  |    |   |    |      |      | GGGAUUGUAGUUCAA  | UCCAGUUAUCUACAA   | Transl |   |
| 93      | 597    | 3   | .1 | 1 | 20 | 1508 | 1527 | UUGGA            | UUCC              | ation  | 1 |
| trf_7_1 | Bra023 | 12  |    |   |    |      |      | GGGAUUGUAGUUCAA  | UCCAAGUGAACAUCAA  | Transl |   |
| 93      | 172    | 3   | .4 | 1 | 20 | 614  | 633  | UUGGA            | UCCC              | ation  | 1 |
| trf_7_1 | Bra034 | 11  |    |   |    |      |      | GGGAUUGUAGUUCAA  | AUCCAAAUGAGCAGCA  | Transl |   |
| 95      | 753    | 3   | .6 | 1 | 21 | 442  | 462  | UUGGAU           | AUCCC             | ation  | 1 |
| trf_7_1 | Bra003 | 13  |    |   |    |      |      | GGGAUUGUAGUUCAA  | AUCCAGUUAUCUACA   | Transl |   |
| 95      | 597    | 3   | .1 | 1 | 21 | 1507 | 1527 | UUGGAU           | AUCC              | ation  | 1 |
| trf_7_1 | Bra023 | 12  |    |   |    |      |      | GGGAUUGUAGUUCAA  | UCCAAGUGAACAUCAA  | Transl |   |
| 95      | 172    | 3   | .4 | 1 | 20 | 614  | 633  | UUGGA            | UCCC              | ation  | 1 |
| trf_7_2 | Bra020 | 15  |    |   |    |      |      | UCCGUUGUCGUCCAGC | CCAACUGCUGGAAGAC  | Transl |   |
| 11      | 153    | 2.5 | .4 | 1 | 22 | 1953 | 1974 | GGUUAG           | AAUGGG            | ation  | 1 |
| trf_7_2 | Bra012 | 18  |    |   |    |      |      | UCCGUUGUCGUCCAGC | AAUCGCUGAACCACAAC | Transl |   |
| 11      | 143    | 2.5 | .5 | 1 | 20 | 392  | 411  | GGUU             | GGA               | ation  | 1 |
| trf_7_2 | Bra037 | 22  |    |   |    |      |      | UCCGUUGUCGUCCAGC | GUUGAAACCGCUGUCU  | Transl |   |
| 11      | 748    | 3   | .8 | 1 | 25 | 561  | 585  | GGUUAGGAU        | GAUAACGGA         | ation  | 1 |
| trf_7_2 | Bra020 | 15  |    |   |    |      |      | UCCGUUGUCGUCCAGC | CCAACUGCUGGAAGAC  | Transl |   |
| 12      | 153    | 2.5 | .4 | 1 | 22 | 1953 | 1974 | GGUUAG           | AAUGGG            | ation  | 1 |
| trf_7_2 | Bra012 | 18  |    |   |    |      |      | UCCGUUGUCGUCCAGC | AAUCGCUGAACCACAAC | Transl |   |
| 12      | 143    | 2.5 | .5 | 1 | 20 | 392  | 411  | GGUU             | GGA               | ation  | 1 |
| trf_7_2 | Bra037 | 22  |    |   |    |      |      | UCCGUUGUCGUCCAGC | GUUGAAACCGCUGUCU  | Transl |   |
| 12      | 748    | 3   | .8 | 1 | 25 | 561  | 585  | GGUUAGGAU        | GAUAACGGA         | ation  | 1 |

|         |        |     |    |   |    |      |      |                  |                   |        |   |
|---------|--------|-----|----|---|----|------|------|------------------|-------------------|--------|---|
| trf_7_2 | Bra020 | 15  |    |   |    |      |      | UCCGUUGUCGUCCAGC | AACUGCUGGAAGACAA  | Transl |   |
| 14      | 153    | 2.5 | .4 | 1 | 20 | 1955 | 1974 | GGUU             | UGGG              | ation  | 1 |
| trf_7_2 | Bra012 | 18  |    |   |    |      |      | UCCGUUGUCGUCCAGC | AAUCGCUGAACCACAAC | Transl |   |
| 14      | 143    | 2.5 | .5 | 1 | 20 | 392  | 411  | GGUU             | GGA               | ation  | 1 |
| trf_7_2 | Bra037 | 22  |    |   |    |      |      | UCCGUUGUCGUCCAGC | AACCGCUGUCUGAUAA  | Transl |   |
| 14      | 748    | 3   | .8 | 1 | 20 | 566  | 585  | GGUU             | CGGA              | ation  | 1 |
| trf_7_2 | Bra020 | 15  |    |   |    |      |      | NCCGUUGUCGUCCAGC | CCAACUGCUGGAAGAC  | Transl |   |
| 15      | 153    | 3   | .4 | 1 | 22 | 1953 | 1974 | GGUUAG           | AAUGGG            | ation  | 1 |
| trf_7_2 | Bra020 | 15  |    |   |    |      |      | UCCGUUGUCGUCCAGC | CCAACUGCUGGAAGAC  | Transl |   |
| 16      | 153    | 2.5 | .4 | 1 | 22 | 1953 | 1974 | GGUUAG           | AAUGGG            | ation  | 1 |
| trf_7_2 | Bra012 | 18  |    |   |    |      |      | UCCGUUGUCGUCCAGC | AAUCGCUGAACCACAAC | Transl |   |
| 16      | 143    | 2.5 | .5 | 1 | 20 | 392  | 411  | GGUU             | GGA               | ation  | 1 |
| trf_7_2 | Bra037 | 22  |    |   |    |      |      | UCCGUUGUCGUCCAGC | AACCGCUGUCUGAUAA  | Transl |   |
| 16      | 748    | 3   | .8 | 1 | 20 | 566  | 585  | GGUU             | CGGA              | ation  | 1 |
| trf_7_2 | Bra020 | 15  |    |   |    |      |      | UCCGUUGUCGUCCAGC | CCAACUGCUGGAAGAC  | Transl |   |
| 17      | 153    | 2.5 | .4 | 1 | 22 | 1953 | 1974 | GGUUAG           | AAUGGG            | ation  | 1 |
| trf_7_2 | Bra012 | 18  |    |   |    |      |      | UCCGUUGUCGUCCAGC | AAUCGCUGAACCACAAC | Transl |   |
| 17      | 143    | 2.5 | .5 | 1 | 20 | 392  | 411  | GGUU             | GGA               | ation  | 1 |
| trf_7_2 | Bra037 | 22  |    |   |    |      |      | UCCGUUGUCGUCCAGC | GUUGAAACCGCUGUCU  | Transl |   |
| 17      | 748    | 3   | .8 | 1 | 25 | 561  | 585  | GGUUAGGAU        | GAUAACGGA         | ation  | 1 |
| trf_7_2 | Bra033 | 21  |    |   |    |      |      | GGGGAUGUAGCUCAAA | ACCCUUUGGGUAACAU  | Transl |   |
| 21      | 370    | 3   | .6 | 1 | 20 | 4750 | 4769 | UGGU             | CCCC              | ation  | 1 |
| trf_7_2 | Bra033 | 21  |    |   |    |      |      | GGGGAUGUAGCUCAAA | ACCCUUUGGGUAACAU  | Transl |   |
| 43      | 370    | 3   | .6 | 1 | 20 | 4750 | 4769 | UGGU             | CCCC              | ation  | 1 |

## rRF Leaves

| ncRNA<br>_Acc. | Target<br>_Acc. | Expect<br>ation | U<br>PE | ncRNA_<br>start | ncRNA_<br>_end | Target_<br>start | Target_<br>_end | ncRNA_aligned_fragm<br>ent | Target_aligned_fragm<br>ent | Inhibiti<br>on | Multipl<br>icity |
|----------------|-----------------|-----------------|---------|-----------------|----------------|------------------|-----------------|----------------------------|-----------------------------|----------------|------------------|
| rrf_1_1        | Bra030          | 2.5             | 18      | 1               | 24             | 1861             | 1884            | CGAUCCACUGAGAUU            | AAAAGGCUGAAUCUU             | Cleava         | 1                |
|                | 994             |                 | .8      |                 |                |                  |                 | CAGCCCUUU                  | ACUGGAUCU                   | ge             |                  |
| rrf_1_1        | Bra034          | 3               | 19      | 1               | 20             | 2024             | 2043            | CGAUCCACUGAGAUU            | GGCUUGAUCUUAGUG             | Cleava         | 1                |
|                | 079             |                 | .1      |                 |                |                  |                 | CAGCC                      | GAUCC                       | ge             |                  |
| rrf_1_2        | Bra030          | 2.5             | 18      | 1               | 24             | 1861             | 1884            | CGAUCCACUGAGAUU            | AAAAGGCUGAAUCUU             | Cleava         | 1                |
|                | 994             |                 | .8      |                 |                |                  |                 | CAGCCCUUU                  | ACUGGAUCU                   | ge             |                  |
| rrf_1_2        | Bra034          | 3               | 19      | 1               | 20             | 2024             | 2043            | CGAUCCACUGAGAUU            | GGCUUGAUCUUAGUG             | Cleava         | 1                |
|                | 079             |                 | .1      |                 |                |                  |                 | CAGCC                      | GAUCC                       | ge             |                  |
| rrf_1_4        | Bra030          | 2.5             | 18      | 1               | 24             | 1861             | 1884            | CGAUCCACUGAGAUU            | AAAAGGCUGAAUCUU             | Cleava         | 1                |
|                | 994             |                 | .8      |                 |                |                  |                 | CAGCCCUUU                  | ACUGGAUCU                   | ge             |                  |
| rrf_1_4        | Bra034          | 3               | 19      | 1               | 20             | 2024             | 2043            | CGAUCCACUGAGAUU            | GGCUUGAUCUUAGUG             | Cleava         | 1                |
|                | 079             |                 | .1      |                 |                |                  |                 | CAGCC                      | GAUCC                       | ge             |                  |
| rrf_1_5        | Bra030          | 2.5             | 18      | 1               | 24             | 1861             | 1884            | CGAUCCACUGAGAUU            | AAAAGGCUGAAUCUU             | Cleava         | 1                |
|                | 994             |                 | .8      |                 |                |                  |                 | CAGCCCUUU                  | ACUGGAUCU                   | ge             |                  |
| rrf_1_5        | Bra034          | 3               | 19      | 1               | 20             | 2024             | 2043            | CGAUCCACUGAGAUU            | GGCUUGAUCUUAGUG             | Cleava         | 1                |
|                | 079             |                 | .1      |                 |                |                  |                 | CAGCC                      | GAUCC                       | ge             |                  |
| rrf_1_7        | Bra030          | 2.5             | 18      | 1               | 24             | 1861             | 1884            | CGAUCCACUGAGAUU            | AAAAGGCUGAAUCUU             | Cleava         | 1                |
|                | 994             |                 | .8      |                 |                |                  |                 | CAGCCCUUU                  | ACUGGAUCU                   | ge             |                  |
| rrf_1_7        | Bra034          | 3               | 19      | 1               | 20             | 2024             | 2043            | CGAUCCACUGAGAUU            | GGCUUGAUCUUAGUG             | Cleava         | 1                |
|                | 079             |                 | .1      |                 |                |                  |                 | CAGCC                      | GAUCC                       | ge             |                  |
| rrf_1_1        | Bra013          | 3               | 23      | 1               | 22             | 10               | 32              | CGAUCCAC-                  | GGAGCUGAAUCUGAU             | Transla        | 1                |
|                | 685             |                 | .3      |                 |                |                  |                 | UGAGAUUCAGCCCU             | GUGGAUCG                    | tion           |                  |
| rrf_1_2        | Bra013          | 3               | 23      | 1               | 22             | 10               | 32              | CGAUCCAC-                  | GGAGCUGAAUCUGAU             | Transla        | 1                |
|                | 685             |                 | .3      |                 |                |                  |                 | UGAGAUUCAGCCCU             | GUGGAUCG                    | tion           |                  |
| rrf_1_4        | Bra013          | 3               | 23      | 1               | 22             | 10               | 32              | CGAUCCAC-                  | GGAGCUGAAUCUGAU             | Transla        | 1                |
|                | 685             |                 | .3      |                 |                |                  |                 | UGAGAUUCAGCCCU             | GUGGAUCG                    | tion           |                  |
| rrf_1_5        | Bra013          | 3               | 23      | 1               | 22             | 10               | 32              | CGAUCCAC-                  | GGAGCUGAAUCUGAU             | Transla        | 1                |
|                | 685             |                 | .3      |                 |                |                  |                 | UGAGAUUCAGCCCU             | GUGGAUCG                    | tion           |                  |
| rrf_1_7        | Bra013          | 3               | 23      | 1               | 22             | 10               | 32              | CGAUCCAC-                  | GGAGCUGAAUCUGAU             | Transla        | 1                |
|                | 685             |                 | .3      |                 |                |                  |                 | UGAGAUUCAGCCCU             | GUGGAUCG                    | tion           |                  |

# rRF Apic meristem

| ncRNA<br>_Acc. | Target<br>_Acc. | Expect<br>ation | U<br>PE  | ncRNA_<br>start | ncRNA_<br>_end | Target_<br>start | Target_<br>_end | ncRNA_aligned_fragm<br>ent        | Target_aligned_fragm<br>ent   | Inhibiti<br>on | Multipl<br>icity |
|----------------|-----------------|-----------------|----------|-----------------|----------------|------------------|-----------------|-----------------------------------|-------------------------------|----------------|------------------|
| rrf_2_5        | Bra030<br>994   | 2.5             | 18<br>.8 | 1               | 24             | 1861             | 1884            | CGAUCCACUGAGAUUC<br>AGCCCUUU      | AAAAGGCUGAAUCUU<br>ACUGGAUCU  | Cleava<br>ge   | 1                |
| rrf_2_5        | Bra034<br>079   | 3               | 19<br>.1 | 1               | 20             | 2024             | 2043            | CGAUCCACUGAGAUUC<br>AGCC          | GGCUUGAUCUUAGUG<br>GAUCC      | Cleava<br>ge   | 1                |
| rrf_2_1<br>0   | Bra030<br>994   | 2.5             | 18<br>.8 | 1               | 24             | 1861             | 1884            | CGAUCCACUGAGAUUC<br>AGCCCUUU      | AAAAGGCUGAAUCUU<br>ACUGGAUCU  | Cleava<br>ge   | 1                |
| rrf_2_1<br>0   | Bra034<br>079   | 3               | 19<br>.1 | 1               | 20             | 2024             | 2043            | CGAUCCACUGAGAUUC<br>AGCC          | GGCUUGAUCUUAGUG<br>GAUCC      | Cleava<br>ge   | 1                |
| rrf_2_1<br>1   | Bra001<br>816   | 2               | 19<br>.2 | 1               | 24             | 220              | 243             | AGUUGCAUUUUCCUU<br>GACACUUUU      | AAAAGCGUCAAGGAG<br>GAUGCAACU  | Cleava<br>ge   | 1                |
| rrf_2_1<br>1   | Bra028<br>470   | 3               | 10<br>.8 | 1               | 24             | 205              | 228             | AGUUGCAUUUUCCUU<br>GACACUUUU      | AAGAGUGUCAUGGAA<br>AAUUCAGCU  | Cleava<br>ge   | 1                |
| rrf_2_1<br>1   | Bra028<br>748   | 3               | 18<br>.0 | 1               | 24             | 446              | 468             | AGUUGCAUUUUCCUU<br>GACACUUUU      | AGGAG-<br>GUCAAGGAGAAUGCG     | Cleava<br>ge   | 1                |
| rrf_2_1<br>1   | Bra021<br>522   | 3               | 20<br>.7 | 1               | 24             | 1018             | 1041            | AGUUGCAUUUUCCUU<br>GACACUUUU      | ACU<br>AAAUGCGGCAAUGAA        | Cleava<br>ge   | 1                |
| rrf_2_1<br>1   | Bra033<br>125   | 3               | 18<br>.6 | 1               | 21             | 16               | 36              | AGUUGCAUUUUCCUU<br>GACACU         | AAUGCAACU<br>ACUGCCAAGGAAAAU  | Cleava<br>ge   | 1                |
| rrf_2_1<br>1   | Bra013<br>166   | 3               | 13<br>.5 | 1               | 20             | 293              | 312             | AGUUGCAUUUUCCUU<br>GACAC          | AUGUCAAGAGAAUG<br>CAAUU       | Cleava<br>ge   | 1                |
| rrf_2_1<br>1   | Bra032<br>998   | 3               | 12<br>.8 | 1               | 24             | 319              | 343             | AGUUG-<br>CAUUUUCCUUGACAC<br>UUUU | GAACCUGUCAAGGAA<br>AAUGACGACU | Cleava<br>ge   | 1                |
| rrf_2_1<br>1   | Bra030<br>472   | 3               | 19<br>.2 | 1               | 24             | 1803             | 1826            | AGUUGCAUUUUCCUU<br>GACACUUUU      | GAGCAUGUCAAGAA<br>ACUGCAACU   | Cleava<br>ge   | 1                |
| rrf_2_1<br>2   | Bra030<br>994   | 2.5             | 18<br>.8 | 1               | 24             | 1861             | 1884            | CGAUCCACUGAGAUUC<br>AGCCCUUU      | AAAAGGCUGAAUCUU<br>ACUGGAUCU  | Cleava<br>ge   | 1                |
| rrf_2_1<br>2   | Bra034<br>079   | 3               | 19<br>.1 | 1               | 20             | 2024             | 2043            | CGAUCCACUGAGAUUC<br>AGCC          | GGCUUGAUCUUAGUG<br>GAUCC      | Cleava<br>ge   | 1                |

|         |        |     |    |   |    |      |      |                  |                 |          |   |
|---------|--------|-----|----|---|----|------|------|------------------|-----------------|----------|---|
| rrf_2_1 | Bra030 |     | 18 |   |    |      |      | CGAUCCACUGAGAUUC | AAAAGGCUGAAUCUU | Cleavage |   |
| 5       | 994    | 2.5 | .8 | 1 | 24 | 1861 | 1884 | AGCCCUUU         | ACUGGAUCU       | ge       | 1 |
| rrf_2_1 | Bra034 |     | 19 |   |    |      |      | CGAUCCACUGAGAUUC | GGCUUGAUCUUAGUG | Cleavage |   |
| 5       | 079    | 3   | .1 | 1 | 20 | 2024 | 2043 | AGCC             | GAUCC           | ge       | 1 |
|         | Bra013 |     | 23 |   |    |      |      | CGAUCCAC-        | GGAGCUGAAUCUGAU | Transl   |   |
| rrf_2_5 | 685    | 3   | .3 | 1 | 22 | 10   | 32   | UGAGAUUCAGCCCU   | GUGGAUCG        | ation    | 1 |
| rrf_2_1 | Bra013 |     | 23 |   |    |      |      | CGAUCCAC-        | GGAGCUGAAUCUGAU | Transl   |   |
| 0       | 685    | 3   | .3 | 1 | 22 | 10   | 32   | UGAGAUUCAGCCCU   | GUGGAUCG        | ation    | 1 |
| rrf_2_1 | Bra013 |     | 23 |   |    |      |      | CGAUCCAC-        | GGAGCUGAAUCUGAU | Transl   |   |
| 2       | 685    | 3   | .3 | 1 | 22 | 10   | 32   | UGAGAUUCAGCCCU   | GUGGAUCG        | ation    | 1 |
| rrf_2_1 | Bra013 |     | 23 |   |    |      |      | CGAUCCAC-        | GGAGCUGAAUCUGAU | Transl   |   |
| 5       | 685    | 3   | .3 | 1 | 22 | 10   | 32   | UGAGAUUCAGCCCU   | GUGGAUCG        | ation    | 1 |

#### rRF Unpollinated Ovules

| ncRNA<br>_Acc. | Target<br>_Acc. | Expect<br>ation | U<br>PE | ncRNA_<br>start | ncRNA_<br>_end | Target_<br>start | Target_<br>_end | ncRNA_aligned_fragm<br>ent | Target_aligned_fragm<br>ent | Inhibiti<br>on | Multipl<br>icity |
|----------------|-----------------|-----------------|---------|-----------------|----------------|------------------|-----------------|----------------------------|-----------------------------|----------------|------------------|
|                | Bra013          |                 | 23      |                 |                |                  |                 | CGAUCCAC-                  | GGAGCUGAAUCUGAU             | Transla        |                  |
| rrf_4_3        | 685             | 3               | .3      | 1               | 22             | 10               | 32              | UGAGAUUCAGCCCU             | GUGGAUCG                    | tion           | 1                |
|                | Bra030          |                 | 18      |                 |                |                  |                 | CGAUCCACUGAGAUU            | AAAAGGCUGAAUCUU             | Cleavage       |                  |
| rrf_4_3        | 994             | 2.5             | .8      | 1               | 24             | 1861             | 1884            | CAGCCCUUU                  | ACUGGAUCU                   | ge             | 1                |
|                | Bra034          |                 | 19      |                 |                |                  |                 | CGAUCCACUGAGAUU            | GGCUUGAUCUUAGUG             | Cleavage       |                  |
| rrf_4_3        | 079             | 3               | .1      | 1               | 20             | 2024             | 2043            | CAGCC                      | GAUCC                       | ge             | 1                |

#### rRF Pollinated Ovules

| ncRNA<br>_Acc. | Target<br>_Acc. | Expect<br>ation | U<br>PE | ncRNA_<br>start | ncRNA_<br>_end | Target_<br>start | Target_<br>_end | ncRNA_aligned_fragm<br>ent | Target_aligned_fragm<br>ent | Inhibiti<br>on | Multipl<br>icity |
|----------------|-----------------|-----------------|---------|-----------------|----------------|------------------|-----------------|----------------------------|-----------------------------|----------------|------------------|
|                | Bra013          |                 | 23      |                 |                |                  |                 | CGAUCCAC-                  | GGAGCUGAAUCUGAU             | Transla        |                  |
| rrf_5_4        | 685             | 3               | .3      | 1               | 22             | 10               | 32              | UGAGAUUCAGCCCU             | GUGGAUCG                    | tion           | 1                |
|                | Bra030          |                 | 18      |                 |                |                  |                 | CGAUCCACUGAGAUU            | AAAAGGCUGAAUCUU             | Cleavage       |                  |
| rrf_5_4        | 994             | 2.5             | .8      | 1               | 24             | 1861             | 1884            | CAGCCCUUU                  | ACUGGAUCU                   | ge             | 1                |
| rrf_5_4        | Bra034          | 3               | 19      | 1               | 20             | 2024             | 2043            | CGAUCCACUGAGAUU            | GGCUUGAUCUUAGUG             | Cleavage       | 1                |

|         |        |   |    |   |    |      |      |                 |                 |         |   |
|---------|--------|---|----|---|----|------|------|-----------------|-----------------|---------|---|
|         | 079    |   | .1 |   |    |      |      | CAGCC           | GAUCC           | ge      |   |
| rnf_5_1 | Bra021 |   | 14 |   |    |      |      | UAGGUGAACCUGCGG | AUCCUUCCGCGGCUU | Transla |   |
| 2       | 135    | 3 | .3 | 1 | 21 | 67   | 87   | AAGGAU          | CACUUU          | tion    | 1 |
| rnf_5_1 | Bra026 |   | 12 |   |    |      |      | UAGGUGAACCUGCGG | UCCUUUCCCACGUUC | Transla |   |
| 2       | 243    | 3 | .3 | 1 | 20 | 1656 | 1675 | AAGGA           | ACCUG           | tion    | 1 |

### rRF Embryo

| ncRNA<br>_Acc. | Target<br>_Acc. | Expect<br>ation | U<br>PE | ncRNA_<br>start | ncRNA_<br>_end | Target_<br>start | Target_<br>_end | ncRNA_aligned_fragm<br>ent | Target_aligned_fragm<br>ent | Inhibiti<br>on | Multipl<br>icity |
|----------------|-----------------|-----------------|---------|-----------------|----------------|------------------|-----------------|----------------------------|-----------------------------|----------------|------------------|
|                | Bra013          |                 | 23      |                 |                |                  |                 | CGAUCCAC-                  | GGAGCUGAAUCUGAU             | Transla        |                  |
| rnf_6_1        | 685             | 3               | .3      | 1               | 22             | 10               | 32              | UGAGAUUCAGCCCU             | GUGGAUCG                    | tion           | 1                |
|                | Bra030          |                 | 18      |                 |                |                  |                 | CGAUCCACUGAGAUU            | AAAAGGCUGAAUCUU             | Cleava         |                  |
| rnf_6_1        | 994             | 2.5             | .8      | 1               | 24             | 1861             | 1884            | CAGCCCUUU                  | ACUGGAUCU                   | ge             | 1                |
|                | Bra034          |                 | 19      |                 |                |                  |                 | CGAUCCACUGAGAUU            | GGCUUGAUCUUAGUG             | Cleava         |                  |
| rnf_6_1        | 079             | 3               | .1      | 1               | 20             | 2024             | 2043            | CAGCC                      | GAUCC                       | ge             | 1                |

### rRF Endosperm

| ncRNA<br>_Acc. | Target<br>_Acc. | Expect<br>ation | U<br>PE | ncRNA_<br>start | ncRNA_<br>_end | Target_<br>start | Target_<br>_end | ncRNA_aligned_fragm<br>ent | Target_aligned_fragm<br>ent | Inhibiti<br>on | Multipl<br>icity |
|----------------|-----------------|-----------------|---------|-----------------|----------------|------------------|-----------------|----------------------------|-----------------------------|----------------|------------------|
|                | Bra013          |                 | 23      |                 |                |                  |                 | CGAUCCAC-                  | GGAGCUGAAUCUGAU             | Transla        |                  |
| rnf_7_1        | 685             | 3               | .3      | 1               | 22             | 10               | 32              | UGAGAUUCAGCCCU             | GUGGAUCG                    | tion           | 1                |
|                | Bra030          |                 | 18      |                 |                |                  |                 | CGAUCCACUGAGAUU            | AAAAGGCUGAAUCUU             | Cleava         |                  |
| rnf_7_1        | 994             | 2.5             | .8      | 1               | 24             | 1861             | 1884            | CAGCCCUUU                  | ACUGGAUCU                   | ge             | 1                |
|                | Bra034          |                 | 19      |                 |                |                  |                 | CGAUCCACUGAGAUU            | GGCUUGAUCUUAGUG             | Cleava         |                  |
| rnf_7_1        | 079             | 3               | .1      | 1               | 20             | 2024             | 2043            | CAGCC                      | GAUCC                       | ge             | 1                |

### snRF Leaves

| ncRNA_<br>_Acc. | Target_<br>_Acc. | Expecta<br>tion | UP | ncRNA_<br>start | ncRNA_<br>_end | Target_<br>start | Target_<br>_end | ncRNA_aligned_frag | Target_aligned_frag | Inhibiti | Multipl |
|-----------------|------------------|-----------------|----|-----------------|----------------|------------------|-----------------|--------------------|---------------------|----------|---------|
|-----------------|------------------|-----------------|----|-----------------|----------------|------------------|-----------------|--------------------|---------------------|----------|---------|



| Acc.     | Acc.      | tion | E        | start | end | start | end | ment                      | ment                     | on          | icity |
|----------|-----------|------|----------|-------|-----|-------|-----|---------------------------|--------------------------|-------------|-------|
| snrf_1_2 | Bra015318 | 3    | 18<br>.7 | 1     | 20  | 12    | 31  | GGAAGGGCUCCCUU<br>CGGGGU  | UUCCCGAGGGAG<br>UCCUUCU  | Cleavage    | 1     |
| snrf_1_2 | Bra017901 | 3    | 22<br>.0 | 1     | 20  | 74    | 93  | GGAAGGGCUCCCUU<br>CGGGGU  | AUCCCGAGGAGAGC<br>UCUUCU | Translation | 1     |
| snrf_1_3 | Bra027237 | 3    | 22<br>.6 | 1     | 20  | 829   | 848 | GGAAGGGCUCCUUU<br>CGGGGU  | AACCUGAAACGAGC<br>UCUUC  | Translation | 1     |
| snrf_1_3 | Bra039942 | 2.5  | 20<br>.0 | 1     | 21  | 923   | 943 | GGAAGGGCUCCUUU<br>CGGGGUA | UAUUCGCAAGGAG<br>CCCUUCU | Cleavage    | 1     |

### snRF Apical meristem

| ncRNA_Acc. | Target_Acc. | Expectation | UPE      | ncRNA_start | ncRNA_end | Target_start | Target_end | ncRNA_aligned_fragment     | Target_aligned_fragment    | Inhibition  | Multiplicity |
|------------|-------------|-------------|----------|-------------|-----------|--------------|------------|----------------------------|----------------------------|-------------|--------------|
| snrf_2_2   | Bra018742   | 3           | 13<br>.6 | 1           | 20        | 1705         | 1724       | AUUGCACGGACUGGC<br>UCAAC   | UUUGAGCCAGACGGU<br>GCAAU   | Translation | 1            |
| snrf_2_9   | Bra011122   | 3           | 17<br>.1 | 1           | 21        | 303          | 323        | ACUGCACGGGCCGGC<br>UCAACC  | GGCUGAGCUGGUCAG<br>UGCAGU  | Cleavage    | 1            |
| snrf_2_36  | Bra007036   | 3           | 24<br>.1 | 1           | 20        | 730          | 749        | UUGCACGGGCUUGG<br>CUCAAC   | UUUGAGCCAAGCCCG<br>UUCAG   | Cleavage    | 1            |
| snrf_2_7   | Bra003006   | 3           | 12<br>.8 | 1           | 20        | 396          | 415        | ACUGCACGGGCUGGC<br>UCAAC   | UUUGAGACAGCUUGU<br>GCAGU   | Cleavage    | 1            |
| snrf_2_27  | Bra010978   | 3           | 16<br>.3 | 1           | 20        | 466          | 485        | ACGGCAUGGACCUGG<br>CUUAA   | UUAAGACGGGUCCAU<br>GCUGC   | Cleavage    | 1            |
| snrf_2_2   | Bra011353   | 3           | 15<br>.4 | 1           | 20        | 493          | 512        | AUUGCACGGACUGGC<br>UCAAC   | GCUGAUCCAGUUUGU<br>GCAAU   | Cleavage    | 1            |
| snrf_2_17  | Bra019990   | 3           | 24<br>.0 | 1           | 22        | 1797         | 1818       | UAUUGCAUGGCCUG<br>GCUCAACC | GUUUGAGCCAGGUCA<br>UGCUAUC | Cleavage    | 1            |
| snrf_2_20  | Bra027119   | 3           | 21<br>.1 | 1           | 22        | 562          | 583        | CUACUGCAUUGGCUG<br>GCUCAAC | GCUGGGCCAGGCGAU<br>GCGGUGG | Cleavage    | 1            |
| snrf_2_1   | Bra032383   | 3           | 23<br>.9 | 1           | 21        | 1509         | 1529       | GCACGGACUGGCUCA<br>ACCCGC  | GUGGGUGAAGCCGGU<br>CCGUGC  | Cleavage    | 1            |
| snrf_2_1   | Bra000      | 3           | 18       | 1           | 22        | 1425         | 1446       | AUUGCACGGGCUUG             | GCUUGAGCCUAGUCC            | Cleavage    | 1            |

|         |        |     |    |   |    |      |      |                 |                 |         |   |
|---------|--------|-----|----|---|----|------|------|-----------------|-----------------|---------|---|
| 38      | 399    |     | .0 |   |    |      |      | GCUCAACC        | GAGCAAU         | ge      |   |
| snrf_2_ | Bra001 |     | 16 |   |    |      |      | UAUUGCACGGAUCU  | UAGAGUUGGAUCUGU | Cleava  |   |
| 31      | 161    | 3   | .4 | 1 | 21 | 2087 | 2107 | GGCUCAA         | GCAAUA          | ge      | 1 |
| snrf_2_ | Bra002 |     | 17 |   |    |      |      | UUGCACGGAUCUGGC | GUUGAGCCAGAUGCG | Cleava  |   |
| 30      | 908    | 3   | .9 | 1 | 20 | 286  | 305  | UCAAC           | UGUGU           | ge      | 1 |
| snrf_2_ | Bra005 |     | 22 |   |    |      |      | CUGCACGGGCUGGCU | GGAGGAGCUAGCCCG | Cleava  |   |
| 24      | 157    | 2.5 | .6 | 1 | 20 | 409  | 428  | CAUCC           | UGCAU           | ge      | 1 |
| snrf_2_ | Bra006 |     | 18 |   |    |      |      | CUGCAUGGACCUGGC | GUACGUUGAGCCAGG | Cleava  |   |
| 26      | 208    | 2.5 | .9 | 1 | 24 | 2898 | 2921 | UCAACCCAC       | UCCAGGUGG       | ge      | 1 |
| snrf_2_ | Bra008 |     | 17 |   |    |      |      | UAUUGCACGGAUCU  | GCUGAUCCGGAUCCG | Cleava  |   |
| 31      | 483    | 3   | .3 | 1 | 22 | 100  | 121  | GGCUCAAC        | UGUGAUG         | ge      | 1 |
| snrf_2_ | Bra011 |     | 22 |   |    |      |      | UUGCACGGAUCUGGC | GGUGAGCUGGAUCUG | Cleava  |   |
| 30      | 732    | 3   | .6 | 1 | 20 | 780  | 799  | UCAAC           | UGCAG           | ge      | 1 |
| snrf_2_ | Bra012 |     | 16 |   |    |      |      | CUACUGCAUUGGCUG | GCUGAGUCAGCUGAU | Cleava  |   |
| 20      | 866    | 3   | .5 | 1 | 22 | 3075 | 3096 | GCUCAAC         | GCAGAAG         | ge      | 1 |
| snrf_2_ | Bra015 |     | 20 |   |    |      |      | CUGCACGGGCUGGCU | GGUUGGGCCAGCACU | Cleava  |   |
| 14      | 754    | 3   | .5 | 1 | 20 | 2082 | 2101 | CAACC           | UGCAG           | ge      | 1 |
| snrf_2_ | Bra017 |     | 19 |   |    |      |      | UGCACGGGCUUGGC  | UGUGUUGCAGCCAAG | Cleava  |   |
| 37      | 342    | 3   | .4 | 1 | 22 | 1440 | 1462 | U-CAACCCA       | CUCGUGUA        | ge      | 1 |
| snrf_2_ | Bra027 |     | 16 |   |    |      |      | CGGCAUGGACCUGGC | GGAUGAGACAGGUUC | Cleava  |   |
| 28      | 318    | 3   | .2 | 1 | 21 | 587  | 607  | UUAACC          | AUGCCG          | ge      | 1 |
| snrf_2_ | Bra030 |     | 18 |   |    |      |      | UGCACGGACUGGC-  | GGUUGAAGCUAGUCU | Cleava  |   |
| 10      | 327    | 3   | .5 | 1 | 19 | 6629 | 6648 | UCAACC          | GUGCA           | ge      | 1 |
| snrf_2_ | Bra031 |     | 18 |   |    |      |      | UAUUGCAUGGCCUG  | GCUUGAGACAGGCUU | Cleava  |   |
| 17      | 747    | 2.5 | .9 | 1 | 22 | 1020 | 1041 | GCUCAACC        | UGCAAUA         | ge      | 1 |
| snrf_2_ | Bra032 |     | 15 |   |    |      |      | UUGCACGGAUCUGGC | GUUGAGCCAGAAGUG | Transla |   |
| 30      | 048    | 2.5 | .7 | 1 | 20 | 207  | 226  | UCAAC           | UGCAA           | tion    | 1 |
| snrf_2_ | Bra034 |     | 17 |   |    |      |      | GCACGGACUGGCUCA | CGAGUUGAGCCAGUC | Cleava  |   |
| 1       | 244    | 3   | .4 | 1 | 20 | 702  | 721  | ACCCG           | UGAGC           | ge      | 1 |
| snrf_2_ | Bra036 |     | 16 |   |    |      |      | CUACUGCAUUGGCUG | GCUGAGUCAGCUGAU | Cleava  |   |
| 20      | 834    | 3   | .6 | 1 | 22 | 2724 | 2745 | GCUCAAC         | GCAGAAG         | ge      | 1 |
| snrf_2_ | Bra041 |     | 20 |   |    |      |      | UUGCAUGGCCUGGC  | GUUGUUUGAGCUAGG | Cleava  |   |
| 18      | 092    | 3   | .1 | 1 | 23 | 990  | 1012 | UCAACCCAC       | UUAUGCAG        | ge      | 1 |

### snRF Pollen

| ncRNA_<br>Acc. | Target_<br>Acc. | Expecta<br>tion | UP<br>E | ncRNA_<br>start | ncRNA<br>_end | Target_<br>start | Target<br>_end | ncRNA_aligned_frag<br>ment  | Target_aligned_fragm<br>ent | Inhibi<br>tion | Multipl<br>icity |
|----------------|-----------------|-----------------|---------|-----------------|---------------|------------------|----------------|-----------------------------|-----------------------------|----------------|------------------|
| snrf_3_<br>11  | Bra017<br>342   | 3               | .4      | 1               | 22            | 1440             | 1462           | UGCACGGGCUUGGC<br>U-CAACCCA | UGUGUUGCAGCCAAG<br>CUCGUGUA | Cleav<br>age   | 1                |
| snrf_3_<br>5   | Bra011<br>353   | 3               | .4      | 1               | 20            | 493              | 512            | AUUGCACGGACUGG<br>CUCAAC    | GCUGAUCCAGUUUGU<br>GCAAU    | Cleav<br>age   | 1                |
| snrf_3_<br>1   | Bra032<br>383   | 3               | .9      | 1               | 21            | 1509             | 1529           | GCACGGACUGGCUC<br>AACCCGC   | GUGGGUGAAGCCGGU<br>CCGUGC   | Cleav<br>age   | 1                |
| snrf_3_<br>4   | Bra003<br>006   | 3               | .8      | 1               | 20            | 396              | 415            | ACUGCACGGGCUGG<br>CUCAAC    | UUUGAGACAGCUUGU<br>GCAGU    | Cleav<br>age   | 1                |
| snrf_3_<br>3   | Bra011<br>122   | 3               | .1      | 1               | 21            | 303              | 323            | ACUGCACGGGCCGGC<br>UCAACC   | GGCUGAGCUGGUCAG<br>UGCAGU   | Cleav<br>age   | 1                |
| snrf_3_<br>2   | Bra030<br>327   | 3               | .5      | 1               | 19            | 6629             | 6648           | UGCACGGACUGGC-<br>UCAACC    | GGUUGAAGCUAGUCU<br>GUGCA    | Cleav<br>age   | 1                |
| snrf_3_<br>1   | Bra034<br>244   | 3               | .4      | 1               | 20            | 702              | 721            | GCACGGACUGGCUC<br>AACCCG    | CGAGUUGAGCCAGUC<br>UGAGC    | Cleav<br>age   | 1                |

### snRF Unpollinated Ovules

| ncRNA_<br>Acc. | Target_<br>Acc. | Expect<br>ation | UP<br>E | ncRNA_<br>start | ncRNA<br>_end | Target_<br>start | Target<br>_end | ncRNA_aligned_frag<br>ment | Target_aligned_fragm<br>ent | Inhibiti<br>on  | Multipl<br>icity |
|----------------|-----------------|-----------------|---------|-----------------|---------------|------------------|----------------|----------------------------|-----------------------------|-----------------|------------------|
| snrf_4_<br>10  | Bra015<br>318   | 3               | .7      | 1               | 20            | 12               | 31             | GGAAGGGCUCCCUU<br>CGGGGU   | UUCCCGGAGGGAGUC<br>CUUCU    | Cleava<br>ge    | 1                |
| snrf_4_<br>10  | Bra017<br>901   | 3               | .0      | 1               | 20            | 74               | 93             | GGAAGGGCUCCCUU<br>CGGGGU   | AUCCCGAGGAGAGCU<br>CUUCU    | Transla<br>tion | 1                |
| snrf_4_<br>3   | Bra018<br>742   | 3               | .0      | 1               | 21            | 1706             | 1726           | CUAUUGCACGGACU<br>GGCUCAA  | UUGAGCCAGACGGUG<br>CAAUAU   | Transla<br>tion | 1                |
| snrf_4_<br>1   | Bra032<br>383   | 3               | .9      | 1               | 21            | 1509             | 1529           | GCACGGACUGGCUC<br>AACCCGC  | GUGGGUGAAGCCGG<br>UCCGUGC   | Cleava<br>ge    | 1                |
| snrf_4_<br>1   | Bra007          | 3               | 24      | 1               | 20            | 730              | 749            | UUGCACGGGCUUGG             | UUUGAGCCAAGCCCG             | Cleava          | 1                |

|         |        |     |    |   |    |      |      |                 |                 |         |   |
|---------|--------|-----|----|---|----|------|------|-----------------|-----------------|---------|---|
| 18      | 036    |     | .1 |   |    |      |      | CUCAAC          | UUCAG           | ge      |   |
| snrf_4_ | Bra011 |     | 17 |   |    |      |      | CUACUGCACGGGCCG | GGCUGAGCUGGUCAG | Transla |   |
| 5       | 122    | 3   | .5 | 1 | 23 | 303  | 325  | GCUCAACC        | UGCAGUAC        | tion    | 1 |
| snrf_4_ | Bra027 |     | 21 |   |    |      |      | CUAUUGCAUGGCCU  | GCUGGGCCAGGCGAU | Transla |   |
| 9       | 119    | 3   | .1 | 1 | 22 | 562  | 583  | GGCUCAAC        | GCGGUGG         | tion    | 1 |
| snrf_4_ | Bra027 |     | 22 |   |    |      |      | GGAAGGGCUCCUUU  | AACCUGAAACGAGCU | Transla |   |
| 17      | 237    | 3   | .6 | 1 | 20 | 829  | 848  | CGGGGU          | CUUCC           | tion    | 1 |
| snrf_4_ | Bra030 |     | 18 |   |    |      |      | UGCACGGACUGGC-  | GGUUGAAGCUAGUC  | Cleava  |   |
| 2       | 327    | 3   | .5 | 1 | 19 | 6629 | 6648 | UCAACC          | UGUGCA          | ge      | 1 |
| snrf_4_ | Bra034 |     | 17 |   |    |      |      | GCACGGACUGGCUC  | CGAGUUGAGCCAGUC | Cleava  |   |
| 1       | 244    | 3   | .4 | 1 | 20 | 702  | 721  | AACCCG          | UGAGC           | ge      | 1 |
| snrf_4_ | Bra039 |     | 20 |   |    |      |      | GGAAGGGCUCCUUU  | UAUUCGCAAGGAGC  | Cleava  |   |
| 17      | 942    | 2.5 | .0 | 1 | 21 | 923  | 943  | CGGGGUA         | CCUUCU          | ge      | 1 |

#### snRF Pollinated Ovules

| ncRNA   | Target | Expect |      | ncRNA_ | ncRNA | Target_ | Target | ncRNA_aligned_frag | Target_aligned_fragm | Inhibiti | Multipl |
|---------|--------|--------|------|--------|-------|---------|--------|--------------------|----------------------|----------|---------|
| _Acc.   | _Acc.  | ation  | UPE  | start  | _end  | start   | _end   | ment               | ent                  | on       | icity   |
| snrf_5_ | Bra018 |        | 14.0 |        |       |         |        | CUAUUGCACGGACU     | UUGAGCCAGACGGUG      | Transl   |         |
| 5       | 742    | 3      | 16   | 1      | 21    | 1706    | 1726   | GGCUCAA            | CAAUAU               | ation    | 1       |
| snrf_5_ | Bra032 |        | 23.8 |        |       |         |        | UGCACGGACUGGCUC    | GUGGGUGAAGCCGGU      | Cleava   |         |
| 1       | 383    | 3      | 96   | 1      | 22    | 1509    | 1530   | AACCCGC            | CCGUGCG              | ge       | 1       |
| snrf_5_ | Bra011 |        | 15.4 |        |       |         |        | AUUGCACGGACUGG     | GCUGAUCCAGUUUGU      | Cleava   |         |
| 9       | 353    | 3      | 38   | 1      | 20    | 493     | 512    | CUCAAC             | GCAAU                | ge       | 1       |
| snrf_5_ | Bra006 |        | 18.8 |        |       |         |        | CUGCAUGGACCUGGC    | GUACGUUGAGCCAGG      | Cleava   |         |
| 15      | 208    | 2.5    | 76   | 1      | 24    | 2898    | 2921   | UCAACCCAC          | UCCAGGUGG            | ge       | 1       |
| snrf_5_ | Bra007 |        | 24.1 |        |       |         |        | UUGCACGGGCUUGG     | UUUGAGCCAAGCCCG      | Cleava   |         |
| 20      | 036    | 3      | 14   | 1      | 20    | 730     | 749    | CUCAAC             | UUCAG                | ge       | 1       |
| snrf_5_ | Bra010 |        | 16.3 |        |       |         |        | ACGGCAUGGACCUG     | UUAAGACGGGUCCAU      | Cleava   |         |
| 14      | 978    | 3      | 31   | 1      | 20    | 466     | 485    | GCUUAA             | GCUGC                | ge       | 1       |
| snrf_5_ | Bra011 |        | 17.4 |        |       |         |        | CUACUGCACGGGCCG    | GGCUGAGCUGGUCAG      | Transl   |         |
| 2       | 122    | 3      | 57   | 1      | 23    | 303     | 325    | GCUCAACC           | UGCAGUAC             | ation    | 1       |

|          |           |        |   |   |    |      |      |                      |                      |          |   |
|----------|-----------|--------|---|---|----|------|------|----------------------|----------------------|----------|---|
| snrf_5_1 | Bra030327 | 18.523 | 3 | 1 | 19 | 6629 | 6648 | UGCACGGACUGGC-UCAACC | GGUUGAAGCUAGUCUGUGCA | Cleavage | 1 |
| snrf_5_7 | Bra034244 | 17.379 | 3 | 1 | 20 | 702  | 721  | GCACGGACUGGCUCAACCCG | CGAGUUGAGCCAGUCUGAGC | Cleavage | 1 |

### snRF Embryo

| ncRNA_Acc. | Target_Acc. | Expectation | UPE     | ncRNA_start | ncRNA_end | Target_start | Target_end | ncRNA_aligned_fragment  | Target_aligned_fragment | Inhibition  | Multiplicity |
|------------|-------------|-------------|---------|-------------|-----------|--------------|------------|-------------------------|-------------------------|-------------|--------------|
| snrf_6_1   | Bra018742   | 3           | 14.016  | 1           | 21        | 1706         | 1726       | CUAUUGCACGGACUGGCUCAA   | UUGAGCCAGACGGUGCAAUAU   | Translation | 1            |
| snrf_6_10  | Bra015318   | 3           | 18.697  | 1           | 20        | 12           | 31         | GGAAGGGCUCUUU           | UUCCCGAGGGAGUCCUUCU     | Cleavage    | 1            |
| snrf_6_10  | Bra017901   | 3           | 22.003  | 1           | 20        | 74           | 93         | GGAAGGGCUCUUU           | AUCCCGAGGAGAGCUCUUCU    | Translation | 1            |
| snrf_6_9   | Bra027237   | 3           | 22.615  | 1           | 20        | 829          | 848        | GGAAGGGCUCUUU           | AACCUGAAACGAGCUCUCC     | Translation | 1            |
| snrf_6_9   | Bra039942   | 2.5         | 20.004  | 1           | 21        | 923          | 943        | GGAAGGGCUCUUU           | UAUUCCGCAAGGAGCCUUCU    | Cleavage    | 1            |
| snrf_6_6   | Bra011353   | 3           | 15.438  | 1           | 20        | 493          | 512        | AUUGCACGGACUGGCUAAC     | GCUGAUCCAGUUUGUGCAAU    | Cleavage    | 1            |
| snrf_6_4   | Bra032383   | 3           | 23.918  | 1           | 21        | 1509         | 1529       | GCACGGACUGGCUC          | GUGGGUGAAGCCGGUCCGUGC   | Cleavage    | 1            |
| snrf_6_23  | Bra001161   | 3           | 16.408  | 1           | 21        | 2087         | 2107       | AACCCGC                 | UAUUGCACGGAUCUGGCUCAA   | Cleavage    | 1            |
| snrf_6_23  | Bra008483   | 3           | 17.259  | 1           | 22        | 100          | 121        | UAUUGCACGGAUCUGGCUCAAC  | GCUGAUCCGGAUCCGUGUGAUG  | Cleavage    | 1            |
| snrf_6_21  | Bra017746   | 2.5         | 21.525  | 1           | 22        | 1213         | 1234       | UUGCAAGGGCCCCGGCUCAUCCC | GAGAUAGGCAGGCCUUGCGA    | Cleavage    | 1            |
| snrf_6_7   | Bra019990   | 3           | 23.993  | 1           | 22        | 1797         | 1818       | UAUUGCAUGGCCUGGCUCAACC  | GUUUGAGCCAGGUC          | Cleavage    | 1            |
| snrf_6_7   | Bra022405   | 3           | 19.2425 | 1           | 21        | 405          | 425        | UUGCAAGGGCCCCGG         | AUGCUAUCGGAUGAACCGGGCAC | Cleavage    | 1            |

|         |        |     |      |   |    |      |      |                 |                 |         |   |
|---------|--------|-----|------|---|----|------|------|-----------------|-----------------|---------|---|
| 21      | 087    |     | 37   |   |    |      |      | CUCAUCC         | UUGUGA          | ge      |   |
| snrf_6_ | Bra022 |     | 21.2 |   |    |      |      | UUGCAAGGGCCCCGG | GGAUGAACCGGGCAC | Cleava  |   |
| 21      | 088    | 3   | 25   | 1 | 21 | 387  | 407  | CUCAUCC         | UUGUGA          | ge      | 1 |
| snrf_6_ | Bra024 |     | 23.6 |   |    |      |      | UUGCAAGGGCCCCGG | CGAGAUAGAGGCAGG | Cleava  |   |
| 21      | 487    | 2.5 | 37   | 1 | 23 | 1332 | 1354 | CUCAUCCCG       | CUCUUGCAA       | ge      | 1 |
| snrf_6_ | Bra027 |     | 21.0 |   |    |      |      | CUAUUGCAUGGCCU  | GCUGGGCCAGGCGA  | Transla |   |
| 8       | 119    | 3   | 72   | 1 | 22 | 562  | 583  | GGCUCAAC        | UGCGGUGG        | tion    | 1 |
| snrf_6_ | Bra031 |     | 18.9 |   |    |      |      | UAUUGCAUGGCCUG  | GCUUGAGACAGGCU  | Cleava  |   |
| 7       | 747    | 2.5 | 2    | 1 | 22 | 1020 | 1041 | GCUCAACC        | UUGCAAUA        | ge      | 1 |
| snrf_6_ | Bra034 |     | 17.3 |   |    |      |      | GCACGGACUGGCUC  | CGAGUUGAGCCAGUC | Cleava  |   |
| 4       | 244    | 3   | 79   | 1 | 20 | 702  | 721  | AACCCG          | UGAGC           | ge      | 1 |

#### snRF Endosperm

| ncRNA_<br>Acc. | Target_<br>Acc. | Expect<br>ation | UP<br>E | ncRNA_<br>start | ncRNA_<br>_end | Target_<br>start | Target_<br>_end | ncRNA_aligned_frag<br>ment | Target_aligned_fragm<br>ent | Inhibiti<br>on | Multipl<br>icity |
|----------------|-----------------|-----------------|---------|-----------------|----------------|------------------|-----------------|----------------------------|-----------------------------|----------------|------------------|
| snrf_7_        | Bra018          |                 | 13      |                 |                |                  |                 | AUUGCACGGACUGG             | UUUGAGCCAGACGGU             | Transla        |                  |
| 2              | 742             | 3               | .6      | 1               | 20             | 1705             | 1724            | CUCAAC                     | GCAAU                       | tion           | 1                |
| snrf_7_        | Bra011          |                 | 15      |                 |                |                  |                 | AUUGCACGGACUGG             | GCUGAUCCAGUUUGU             | Cleava         |                  |
| 2              | 353             | 3               | .4      | 1               | 20             | 493              | 512             | CUCAAC                     | GCAAU                       | ge             | 1                |
| snrf_7_        | Bra032          |                 | 23      |                 |                |                  |                 | UGCACGGACUGGCUC            | GUGGGUGAAGCCGG              | Cleava         |                  |
| 1              | 383             | 3               | .9      | 1               | 22             | 1509             | 1530            | AACCCGC                    | UCCGUGCG                    | ge             | 1                |
| snrf_7_        | Bra001          |                 | 16      |                 |                |                  |                 | UAUUGCACGGAUCU             | UAGAGUUGGAUCUG              | Cleava         |                  |
| 14             | 161             | 3               | .4      | 1               | 21             | 2087             | 2107            | GGCUCAA                    | UGCAAUA                     | ge             | 1                |
| snrf_7_        | Bra002          |                 | 17      |                 |                |                  |                 | UUGCACGGAUCUGG             | GUUGAGCCAGAUGCG             | Cleava         |                  |
| 15             | 908             | 3               | .9      | 1               | 20             | 286              | 305             | CUCAAC                     | UGUGU                       | ge             | 1                |
| snrf_7_        | Bra005          |                 | 22      |                 |                |                  |                 | CUGCACGGGCUGGC             | GGAGGAGCUAGCCCCG            | Cleava         |                  |
| 12             | 157             | 2.5             | .6      | 1               | 20             | 409              | 428             | UCAUCC                     | UGCAU                       | ge             | 1                |
| snrf_7_        | Bra007          |                 | 24      |                 |                |                  |                 | UUGCACGGGCUUGG             | UUUGAGCCAAGCCCCG            | Cleava         |                  |
| 20             | 036             | 3               | .1      | 1               | 20             | 730              | 749             | CUCAAC                     | UUCAG                       | ge             | 1                |
| snrf_7_        | Bra008          |                 | 17      |                 |                |                  |                 | UAUUGCACGGAUCU             | GCUGAUCCGGAUCCG             | Cleava         |                  |
| 14             | 483             | 3               | .3      | 1               | 22             | 100              | 121             | GGCUCAAC                   | UGUGAUG                     | ge             | 1                |

|           |           |     |      |   |    |      |      |                              |                             |             |   |
|-----------|-----------|-----|------|---|----|------|------|------------------------------|-----------------------------|-------------|---|
| snrf_7_7  | Bra011122 | 3   | 17.5 | 1 | 23 | 303  | 325  | CUACUGCACGGGCCG<br>GCUCAACC  | GGCUGAGCUGGUCAG<br>UGCAGUAC | Translation | 1 |
| snrf_7_15 | Bra011732 | 3   | 22.6 | 1 | 20 | 780  | 799  | UUGCACGGAUCUGG<br>CUCAAC     | GGUGAGCUGGAUCU<br>GUGCAG    | Cleavage    | 1 |
| snrf_7_13 | Bra017746 | 2.5 | 21.5 | 1 | 22 | 1213 | 1234 | UUGCAAGGGCCCCGGC<br>UCAUCCC  | GAGAUGAGGCAGGCC<br>CUUGCGA  | Cleavage    | 1 |
| snrf_7_13 | Bra022087 | 3   | 19.2 | 1 | 21 | 405  | 425  | UUGCAAGGGCCCCGGC<br>UCAUCC   | GGAUGAACCGGGCAC<br>UUGUGA   | Cleavage    | 1 |
| snrf_7_13 | Bra022088 | 3   | 21.2 | 1 | 21 | 387  | 407  | UUGCAAGGGCCCCGGC<br>UCAUCC   | GGAUGAACCGGGCAC<br>UUGUGA   | Cleavage    | 1 |
| snrf_7_13 | Bra024487 | 2.5 | 23.6 | 1 | 23 | 1332 | 1354 | UUGCAAGGGCCCCGGC<br>UCAUCCCG | CGAGAUGAGGCAGGC<br>UCUUGCAA | Cleavage    | 1 |
| snrf_7_1  | Bra030327 | 3   | 18.5 | 1 | 19 | 6629 | 6648 | UGCACGGACUGGC-<br>UCAACC     | GGUUGAAGCUAGUC<br>UGUGCA    | Cleavage    | 1 |
| snrf_7_15 | Bra032048 | 2.5 | 15.7 | 1 | 20 | 207  | 226  | UUGCACGGAUCUGG<br>CUCAAC     | GUUGAGCCAGAAGUG<br>UGCAA    | Translation | 1 |
| snrf_7_6  | Bra034244 | 3   | 17.4 | 1 | 20 | 702  | 721  | GCACGGACUGGCUCA<br>ACCCG     | CGAGUUGAGCCAGUC<br>UGAGC    | Cleavage    | 1 |

#### snoRF Leaves

| ncRNA_Acc. | Target_Acc. | Expectation | UPE  | ncRNA_start | ncRNA_end | Target_start | Target_end | ncRNA_aligned_fragment        | Target_aligned_fragment       | Inhibition | Multiplicity |
|------------|-------------|-------------|------|-------------|-----------|--------------|------------|-------------------------------|-------------------------------|------------|--------------|
| snorf_1_1  | Bra031281   | 3           | 14.1 | 1           | 24        | 1013         | 1036       | UAUAGUGAUGAAUAUA<br>AUCACAAU  | AUGGUGACUAUAGUUA<br>UCACUAUG  | Cleavage   | 1            |
| snorf_1_1  | Bra010407   | 3           | 18.1 | 1           | 25        | 115          | 139        | UAUAGUGAUGAAUAUA<br>AUCACAAUU | AGUGAUUAUUGUGUU<br>CAUCACUGUG | Cleavage   | 1            |
| snorf_1_2  | Bra033534   | 3           | 12.5 | 1           | 23        | 1050         | 1072       | UGGCAGUGAUGAUUG<br>AGAAUGUC   | GACAAUCUCAAACAUC<br>ACUGCUG   | Cleavage   | 1            |
| snorf_1_2  | Bra012741   | 3           | 15.1 | 1           | 23        | 531          | 553        | UGGCAGUGAUGAUUG<br>AGAAUGUC   | GACAAUCUCAAACAUC<br>ACUGCUG   | Cleavage   | 1            |
| snorf_1_2  | Bra010085   | 3           | 4.5  | 1           | 22        | 531          | 552        | UGGCAGUGAUGAUUG<br>AGAAUGU    | ACUUUCUCCAUCAUCA<br>UUGUCA    | Cleavage   | 1            |

|           |        |     |    |   |    |      |      |                   |                  |          |   |
|-----------|--------|-----|----|---|----|------|------|-------------------|------------------|----------|---|
| snorf_1_2 | Bra026 | 13  |    |   |    |      |      | UGGCAGUGAUGAUUG   | CUGCUCAAUCAUCGCU | Cleavage | 1 |
|           | 106    | 3   | .2 | 1 | 20 | 2324 | 2343 | AGAAU             | GCUA             |          |   |
| snorf_1_4 | Bra030 | 20  |    |   |    |      |      | AAAGAUGAUGAAUAUG  | CAGUGUUUAUUCAUCA | Cleavage | 1 |
|           | 023    | 2.5 | .7 | 1 | 21 | 1214 | 1234 | CACUG             | UCUUG            |          |   |
| snorf_1_4 | Bra036 | 20  |    |   |    |      |      | AAAGAUGAUGAAUAUG  | CAGUGUUUAUUCAUCA | Cleavage | 1 |
|           | 097    | 2.5 | .1 | 1 | 21 | 1397 | 1417 | CACUG             | UCUUG            |          |   |
| snorf_1_4 | Bra036 | 15  |    |   |    |      |      | AAAGAUGAUGAAUAUG  | CCAAUGCAUCAUCAU  | Cleavage | 1 |
|           | 690    | 3   | .2 | 1 | 23 | 1126 | 1148 | CACUGGG           | CAUCUUU          |          |   |
| snorf_1_5 | Bra036 | 20  |    |   |    |      |      | AAAGAUGAUGAAUAUG  | AGUGUUUAUUCAUCAU | Cleavage | 1 |
|           | 097    | 2.5 | .1 | 1 | 20 | 1398 | 1417 | CACU              | CUUG             |          |   |
| snorf_1_5 | Bra030 | 20  |    |   |    |      |      | AAAGAUGAUGAAUAUG  | AGUGUUUAUUCAUCAU | Cleavage | 1 |
|           | 023    | 2.5 | .7 | 1 | 20 | 1215 | 1234 | CACU              | CUUG             |          |   |
| snorf_1_5 | Bra036 | 15  |    |   |    |      |      | AAAGAUGAUGAAUAUG  | AAUGCAUCAUCAUCAU | Cleavage | 1 |
|           | 690    | 3   | .2 | 1 | 20 | 1129 | 1148 | CACU              | CUUU             |          |   |
| snorf_1_6 | Bra022 | 16  |    |   |    |      |      | GAGCUGUGAUGAUAU   | CCCUGAUGUUGUCACA | Cleavage | 1 |
|           | 523    | 3   | .4 | 1 | 20 | 288  | 307  | UAGGC             | GUUC             |          |   |
| snorf_1_6 | Bra035 | 20  |    |   |    |      |      | GAGCUGUGAUGAUAU   | GCCUAGUCUCGUCACG | Cleavage | 1 |
|           | 613    | 2.5 | .7 | 1 | 20 | 153  | 172  | UAGGC             | GCUC             |          |   |
| snorf_1_6 | Bra000 | 12  |    |   |    |      |      | GAGCUGUGAUGAUAU   | GUUUAAUAUAUCACA  | Cleavage | 1 |
|           | 855    | 3   | .5 | 1 | 20 | 1892 | 1911 | UAGGC             | GCUU             |          |   |
| snorf_1_6 | Bra032 | 18  |    |   |    |      |      | GAGCUGUGAUGAUAU   | GUCCGAUAUCAUUACA | Cleavage | 1 |
|           | 852    | 3   | .5 | 1 | 20 | 857  | 876  | UAGGC             | GCUU             |          |   |
| snorf_1_6 | Bra026 | 18  |    |   |    |      |      | GAGCUGUGAUGAUAU   | GUCUAAUCACAUCACA | Cleavage | 1 |
|           | 759    | 3   | .1 | 1 | 20 | 203  | 222  | UAGGC             | GUUC             |          |   |
| snorf_1_6 | Bra004 | 19  |    |   |    |      |      | GAGCUGUGAUGAUAU   | GCCUGAUCUCAUGACA | Cleavage | 1 |
|           | 297    | 3   | .0 | 1 | 20 | 621  | 640  | UAGGC             | GUUC             |          |   |
|           |        |     |    |   |    |      |      |                   | GGCGA-           |          |   |
| snorf_1_7 | Bra000 | 11  |    |   |    |      |      | GAAAGUGAUGAUAAAGG | AGUCCUUGUCAUCCU  | Cleavage | 1 |
|           | 733    | 3   | .7 | 1 | 26 | 817  | 841  | AAUUGUCGCC        | UUUC             |          |   |
| snorf_1_7 | Bra001 | 4.  |    |   |    |      |      | GAAAGUGAUGAUAAAGG | CAAUUCUUUCUCAUCU | Cleavage | 1 |
|           | 673    | 3   | 3  | 1 | 21 | 396  | 416  | AAUUG             | CUUUC            |          |   |
| snorf_1_7 | Bra019 | 24  |    |   |    |      |      | GAAAGUGAUGAUAAAGG | CAUUCGUUGUCGUCAC | Cleavage | 1 |
|           | 926    | 3   | .4 | 1 | 20 | 284  | 303  | AAUU              | UUUC             |          |   |
| snorf_1_7 | Bra001 | 3   | 4. | 1 | 21 | 396  | 416  | GAAAGUGAUGAUAAAGG | CAAUUCUUUCUCAUCU | Cleavage | 1 |



|        |        |     |    |   |    |      |      |                   |                   |        |   |
|--------|--------|-----|----|---|----|------|------|-------------------|-------------------|--------|---|
| 1_8    | 673    |     | 3  |   |    |      |      | AAUUG             | CUUUC             | ge     |   |
| snorf_ | Bra000 |     | 11 |   |    |      |      | GAAAGUGAUGAUAAGG  | AGUUCCUUGUCAUCCU  | Cleava |   |
| 1_8    | 733    | 3   | .7 | 1 | 20 | 822  | 841  | AAUU              | UUUC              | ge     | 1 |
| snorf_ | Bra019 |     | 24 |   |    |      |      | GAAAGUGAUGAUAAGG  | CAUUCGUUGUCGUCAC  | Cleava |   |
| 1_8    | 926    | 3   | .4 | 1 | 20 | 284  | 303  | AAUU              | UUUC              | ge     | 1 |
| snorf_ | Bra026 |     | 14 |   |    |      |      | AUACAGUGAUGAGAUUA | UUCUUGUCACGUCACU  | Cleava |   |
| 1_9    | 860    | 3   | .7 | 1 | 20 | 488  | 507  | AGCA              | GUAU              | ge     | 1 |
| snorf_ | Bra039 |     | 15 |   |    |      |      | CUAAAUGGGAAUCUCU  | UCAGGGAGAUUCUCAU  | Cleava |   |
| 1_10   | 448    | 1   | .3 | 1 | 20 | 820  | 839  | CUGA              | UUAG              | ge     | 1 |
| snorf_ | Bra034 |     | 14 |   |    |      |      | CUAAAUGGGAAUCUCU  | CCAGAGAGAUUCUUAU  | Cleava |   |
| 1_10   | 045    | 2   | .4 | 1 | 20 | 135  | 154  | CUGA              | UUAG              | ge     | 1 |
| snorf_ | Bra029 |     | 14 |   |    |      |      | CUAAAUGGGAAUCUCU  | CCAGAGAAAUUCUUAU  | Cleava |   |
| 1_10   | 738    | 3   | .8 | 1 | 20 | 135  | 154  | CUGA              | UUAG              | ge     | 1 |
| snorf_ | Bra039 |     | 16 |   |    |      |      | AAAUGGGAAUCUCUCU  | ACUCAGGGAGAUUCUC  | Cleava |   |
| 1_11   | 448    | 3   | .6 | 1 | 20 | 818  | 837  | GAUG              | AUUU              | ge     | 1 |
| snorf_ | Bra003 |     | 16 |   |    |      |      | AAAUGGGAAUCUCUCU  | CACCGGAGAGAUUCCU  | Cleava |   |
| 1_11   | 227    | 2.5 | .1 | 1 | 20 | 888  | 907  | GAUG              | GUUU              | ge     | 1 |
| snorf_ | Bra035 |     | 21 |   |    |      |      | AAAUGGGAAUCUCUCU  | CAUGAGAGAGGUUUCC  | Cleava |   |
| 1_11   | 134    | 3   | .8 | 1 | 20 | 2055 | 2074 | GAUG              | AUUG              | ge     | 1 |
| snorf_ | Bra007 |     | 10 |   |    |      |      | AAAUGGGAAUCUCUCU  | CACCAGGUAGAUUCCC  | Cleava |   |
| 1_11   | 474    | 2.5 | .5 | 1 | 20 | 14   | 33   | GAUG              | AUUU              | ge     | 1 |
| snorf_ | Bra036 |     | 18 |   |    |      |      | UCAAAGCAAUGUCUAG  | AGAUCUAGACAUUGCC  | Cleava |   |
| 1_13   | 154    | 2   | .5 | 1 | 20 | 1803 | 1822 | AUUU              | UUGA              | ge     | 1 |
| snorf_ | Bra038 |     | 18 |   |    |      |      | UCAAAGCAAUGUCUAG  | AAAUCGAGACGUUGCU  | Cleava |   |
| 1_13   | 386    | 2   | .9 | 1 | 20 | 102  | 121  | AUUU              | UUGG              | ge     | 1 |
| snorf_ | Bra022 |     | 18 |   |    |      |      | UCAAAGCAAUGUCUAG  | AGAUUUAGACAUUGUC  | Cleava |   |
| 1_13   | 435    | 3   | .2 | 1 | 20 | 289  | 308  | AUUU              | UUGA              | ge     | 1 |
| snorf_ | Bra007 |     | 18 |   |    |      |      | UCAAAGCAAUGUCUAG  | GAAUCUACACAUUGCG  | Cleava |   |
| 1_13   | 634    | 3   | .3 | 1 | 20 | 717  | 736  | AUUU              | UUGA              | ge     | 1 |
| snorf_ | Bra005 |     | 20 |   |    |      |      | UCAAAGCAAUGUCUAG  | AAAUCUACACAUUGCA  | Cleava |   |
| 1_13   | 506    | 3   | .3 | 1 | 20 | 233  | 252  | AUUU              | UUGG              | ge     | 1 |
| snorf_ | Bra035 |     | 17 |   |    |      |      | UCAAAGCAAUGUCUAG  | AAAUCAAGGUUAUAGCU | Cleava |   |
| 1_13   | 465    | 3   | .4 | 1 | 20 | 709  | 728  | AUUU              | UUGA              | ge     | 1 |
| snorf_ | Bra036 | 3   | 24 | 1 | 20 | 2009 | 2029 | UCAAAGCAAUGUC-    | GAAUCAAGACAUUGC   | Cleava | 1 |

|        |        |     |    |   |    |      |      |                    |                  |        |   |
|--------|--------|-----|----|---|----|------|------|--------------------|------------------|--------|---|
| 1_13   | 313    |     | .2 |   |    |      |      | UAGAUUU            | UUUGA            | ge     |   |
| snorf_ | Bra039 |     | 15 |   |    |      |      | CUAAAUGGGAAUCUCU   | UCAGGGAGAUUCUCAU | Cleava |   |
| 1_14   | 448    | 1   | .3 | 1 | 20 | 820  | 839  | CUGA               | UUAG             | ge     | 1 |
| snorf_ | Bra034 |     | 14 |   |    |      |      | CUAAAUGGGAAUCUCU   | CCAGAGAGAUUCUUAU | Cleava |   |
| 1_14   | 045    | 2   | .4 | 1 | 20 | 135  | 154  | CUGA               | UUAG             | ge     | 1 |
| snorf_ | Bra029 |     | 14 |   |    |      |      | CUAAAUGGGAAUCUCU   | CCAGAGAAAUUCUUAU | Cleava |   |
| 1_14   | 738    | 3   | .8 | 1 | 20 | 135  | 154  | CUGA               | UUAG             | ge     | 1 |
| snorf_ | Bra024 |     | 20 |   |    |      |      | CUUCCUUGGAUGUC-    | GGUUUCGUGACAUUCA | Cleava |   |
| 1_16   | 547    | 3   | .3 | 1 | 21 | 151  | 172  | UGAAACC            | AGGAAG           | ge     | 1 |
| snorf_ | Bra020 |     | 10 |   |    |      |      | CUUCCUUGGAUGUCUG   | GUUUUGGACAUUAGA  | Cleava |   |
| 1_16   | 090    | 3   | .7 | 1 | 20 | 69   | 88   | AAAC               | GGAAG            | ge     | 1 |
| snorf_ | Bra015 |     | 22 |   |    |      |      | CUUCCUUGGAUGUCUG   | GUUCCAGACGUCAAGG | Cleava |   |
| 1_16   | 499    | 3   | .8 | 1 | 20 | 1186 | 1205 | AAAC               | GAAG             | ge     | 1 |
| snorf_ | Bra030 |     | 20 |   |    |      |      | CUUCCUUGGAUGUCUG   | GUUCCAGACGUCAAGG | Cleava |   |
| 1_16   | 652    | 3   | .0 | 1 | 20 | 1195 | 1214 | AAAC               | GAAG             | ge     | 1 |
| snorf_ | Bra012 |     | 15 |   |    |      |      | CUUCCUUGGAUG-      | UUUCAGAUCAUUCGAG | Cleava |   |
| 1_16   | 536    | 3   | .3 | 1 | 19 | 555  | 574  | UCUGAAA            | GAAG             | ge     | 1 |
| snorf_ | Bra011 |     | 22 |   |    |      |      | CUUCCUUGGAUGUCUG   | GUUUGAAACAUCAAAG | Cleava |   |
| 1_16   | 271    | 3   | .0 | 1 | 20 | 1170 | 1189 | AAAC               | GAAG             | ge     | 1 |
| snorf_ | Bra006 |     | 19 |   |    |      |      | AACGAGGCAUUUGUCU   | UCUCCGACAAAUGCCU | Cleava |   |
| 1_17   | 972    | 3   | .7 | 1 | 20 | 383  | 402  | GAGA               | UUUU             | ge     | 1 |
| snorf_ | Bra006 |     | 13 |   |    |      |      | AACGAGGCAUUUGUCU   | UCUCCGACAAAUGCCU | Cleava |   |
| 1_17   | 971    | 3   | .6 | 1 | 20 | 383  | 402  | GAGA               | UUUU             | ge     | 1 |
| snorf_ | Bra007 |     | 16 |   |    |      |      | AACGAGGCAUUUGUCU   | CUCUCAGACAGAU-   | Cleava |   |
| 1_17   | 284    | 3   | .8 | 1 | 21 | 1664 | 1683 | GAGAG              | CUUCGUU          | ge     | 1 |
| snorf_ | Bra010 |     | 19 |   |    |      |      | UCUACCCAUAUUUAUUAU | UCAGAUUAUAUGUGGG | Cleava |   |
| 1_18   | 959    | 2   | .5 | 1 | 20 | 565  | 584  | CUGA               | CAGA             | ge     | 1 |
| snorf_ | Bra010 |     | 19 |   |    |      |      | CUACCCAUAUUUAUAUC  | AUCAGAUUAUAUGUGG | Cleava |   |
| 1_20   | 959    | 3   | .9 | 1 | 20 | 564  | 583  | UGAG               | GCAG             | ge     | 1 |
| snorf_ | Bra013 |     | 16 |   |    |      |      | UGAUUAAAAACUAUCA   | UCGGAGUUGA-      | Cleava |   |
| 1_25   | 275    | 2.5 | .1 | 1 | 23 | 1784 | 1805 | GCUCUGA            | AGUUUUUAAUCA     | ge     | 1 |
| snorf_ | Bra019 |     | 14 |   |    |      |      | UGAUUAAAAACU-      | AGAGCUGAUGAGUUU  | Cleava |   |
| 1_25   | 178    | 2.5 | .9 | 1 | 21 | 1696 | 1717 | AUCAGCUCU          | UUGAUCA          | ge     | 1 |
| snorf_ | Bra013 | 3   | 11 | 1 | 20 | 163  | 182  | UGAUUAAAAACUAUCA   | GGGUUGGAAGUUUUU  | Cleava | 1 |

|        |        |     |    |   |    |      |      |                  |                  |        |   |
|--------|--------|-----|----|---|----|------|------|------------------|------------------|--------|---|
| 1_25   | 867    |     | .2 |   |    |      |      | GCUC             | GAUCA            | ge     |   |
| snorf_ | Bra003 |     | 17 |   |    |      |      | UAUGGAGACCUGAACU | CUCUCACUCAGUGCAG | Cleava |   |
| 1_26   | 395    | 3   | .1 | 1 | 25 | 942  | 966  | GAGUGGAGG        | GUCAUCAUA        | ge     | 1 |
| snorf_ | Bra014 |     | 14 |   |    |      |      | UAUGGAGACCUGAACU | CUCUCACUCAGUACAG | Cleava |   |
| 1_26   | 523    | 3   | .6 | 1 | 25 | 942  | 966  | GAGUGGAGG        | GUCAUCAUA        | ge     | 1 |
| snorf_ | Bra007 |     | 10 |   |    |      |      | UAUGGAGACCUGAACU | CUCUCACUCAGUACAG | Cleava |   |
| 1_26   | 493    | 3   | .1 | 1 | 25 | 942  | 966  | GAGUGGAGG        | GUCAUCAUA        | ge     | 1 |
| snorf_ | Bra011 |     | 21 |   |    |      |      | CGAAUAA-         | UUCUUCAGAAUUUGAG | Cleava |   |
| 1_27   | 396    | 2.5 | .4 | 1 | 22 | 1182 | 1204 | UCAAUUUCUGAGGGA  | UUAUUCG          | ge     | 1 |
| snorf_ | Bra035 |     | 18 |   |    |      |      | CGAAUAAUCAAUUCU  | UCUCAGGAUUUGGUUA | Cleava |   |
| 1_27   | 606    | 3   | .6 | 1 | 20 | 487  | 506  | GAGG             | UUGG             | ge     | 1 |
| snorf_ | Bra026 |     | 19 |   |    |      |      | CGAAUAAUCAAUUCU  | CAUUGAGGAUUUGAU  | Cleava |   |
| 1_27   | 200    | 3   | .1 | 1 | 21 | 561  | 581  | GAGGG            | UAUUCG           | ge     | 1 |
| snorf_ | Bra032 |     | 15 |   |    |      |      | AUGUAUUAGCUCUAUC | GCAUUGGAUGGAGCUG | Cleava |   |
| 1_29   | 239    | 2   | .5 | 1 | 22 | 391  | 412  | UGAUCC           | AUACAU           | ge     | 1 |
| snorf_ | Bra014 |     | 17 |   |    |      |      | AUGUAUUAGCUCUAUC | UUUGGAUGGAGCUGA  | Cleava |   |
| 1_29   | 099    | 3   | .9 | 1 | 20 | 393  | 412  | UGAU             | UACAU            | ge     | 1 |
| snorf_ | Bra009 |     | 16 |   |    |      |      | AUGUAUUAGCUCUAUC | AUCAGAUAGAGCUAAA | Cleava |   |
| 1_29   | 459    | 3   | .0 | 1 | 20 | 801  | 820  | UGAU             | GCAG             | ge     | 1 |
| snorf_ | Bra019 |     | 18 |   |    |      |      | AUGUAUUAGCUCUAUC | GUCACAUAGGGCUAAU | Cleava |   |
| 1_29   | 803    | 2.5 | .7 | 1 | 20 | 255  | 274  | UGAU             | GCAU             | ge     | 1 |
| snorf_ | Bra032 |     | 15 |   |    |      |      | AUGUAUUAGCUCUAUC | CUGCAUUGGAUGGAGC | Cleava |   |
| 1_30   | 239    | 2   | .5 | 1 | 24 | 389  | 412  | UGAUCCUG         | UGAUACAU         | ge     | 1 |
| snorf_ | Bra014 |     | 17 |   |    |      |      | AUGUAUUAGCUCUAUC | UUUGGAUGGAGCUGA  | Cleava |   |
| 1_30   | 099    | 3   | .9 | 1 | 20 | 393  | 412  | UGAU             | UACAU            | ge     | 1 |
| snorf_ | Bra009 |     | 16 |   |    |      |      | AUGUAUUAGCUCUAUC | AUCAGAUAGAGCUAAA | Cleava |   |
| 1_30   | 459    | 3   | .0 | 1 | 20 | 801  | 820  | UGAU             | GCAG             | ge     | 1 |
| snorf_ | Bra019 |     | 18 |   |    |      |      | AUGUAUUAGCUCUAUC | GUCACAUAGGGCUAAU | Cleava |   |
| 1_30   | 803    | 2.5 | .7 | 1 | 20 | 255  | 274  | UGAU             | GCAU             | ge     | 1 |
| snorf_ | Bra039 |     | 18 |   |    |      |      | UGUUACACACACUGAG | UAUCAUCUGUGUGUG  | Cleava |   |
| 1_31   | 706    | 3   | .2 | 1 | 20 | 732  | 751  | GCUA             | UAACA            | ge     | 1 |
| snorf_ | Bra014 |     | 24 |   |    |      |      | UCAAGUUUGGCUAUUC | UGCAAAAGAAUGGCCA | Cleava |   |
| 1_35   | 985    | 3   | .0 | 1 | 23 | 303  | 325  | UGUUACA          | AGCUUGC          | ge     | 1 |
| snorf_ | Bra027 | 2.5 | 13 | 1 | 20 | 781  | 800  | UCAAGUUUGGCUAUUC | GACACAAUAGCUAAGC | Cleava | 1 |

|        |        |     |    |   |    |      |      |                   |                   |        |   |
|--------|--------|-----|----|---|----|------|------|-------------------|-------------------|--------|---|
| 1_35   | 883    |     | .4 |   |    |      |      | UGUU              | UUGA              | ge     |   |
| snorf_ | Bra026 |     | 15 |   |    |      |      | UCAAGUUUGGCUAUUC  | UAUCAGAAUUGUCAAG  | Cleava |   |
| 1_35   | 682    | 3   | .4 | 1 | 21 | 1787 | 1807 | UGUUA             | CUUGA             | ge     | 1 |
| snorf_ | Bra026 |     | 14 |   |    |      |      | UCAAGUUUGGCUAUUC  | UAUCAGAAUUGUCAAG  | Cleava |   |
| 1_35   | 977    | 3   | .1 | 1 | 21 | 1886 | 1906 | UGUUA             | CUUGA             | ge     | 1 |
| snorf_ | Bra025 |     | 18 |   |    |      |      | ACUGUUUUACUCGGUG  | CUGCAGCCAAGUAGAA  | Cleava |   |
| 1_36   | 882    | 3   | .7 | 1 | 20 | 1332 | 1351 | GCAG              | CAGU              | ge     | 1 |
| snorf_ | Bra015 |     | 22 |   |    |      |      | CUAGAAAGCUUAAUCU  | GAUCAGAUUAGGGUU   | Cleava |   |
| 1_39   | 786    | 3   | .5 | 1 | 20 | 331  | 350  | GAUU              | UUUGG             | ge     | 1 |
| snorf_ | Bra027 |     | 19 |   |    |      |      | CUAGAAAGCUUAAUCU  | AAGAAGGUUAAGCUUU  | Cleava |   |
| 1_39   | 369    | 2.5 | .2 | 1 | 20 | 505  | 524  | GAUU              | CUAG              | ge     | 1 |
| snorf_ | Bra028 |     | 18 |   |    |      |      | CUAGAAAGCUUAAUCU  | AUUCAGAUUAGGGUU   | Cleava |   |
| 1_39   | 595    | 3   | .7 | 1 | 20 | 645  | 664  | GAUU              | UCUGG             | ge     | 1 |
| snorf_ | Bra030 |     | 11 |   |    |      |      | AUUUUUUUUCUCUGA   | GAUCAUGAGAGGAAUG  | Cleava |   |
| 1_40   | 997    | 2.5 | .5 | 1 | 20 | 772  | 791  | UGAUC             | AGAU              | ge     | 1 |
| snorf_ | Bra030 |     | 16 |   |    |      |      | AUUUUUUUUCUCUGA   | GAUCAUGAGAGGAAUG  | Cleava |   |
| 1_40   | 998    | 2.5 | .2 | 1 | 20 | 3109 | 3128 | UGAUC             | AGAU              | ge     | 1 |
| snorf_ | Bra038 |     | 15 |   |    |      |      | AUUUUUUUUCUCUGA   | GAUCUUAAGAGAAAUA  | Cleava |   |
| 1_40   | 921    | 2.5 | .8 | 1 | 20 | 232  | 251  | UGAUC             | AGAU              | ge     | 1 |
| snorf_ | Bra024 |     | 15 |   |    |      |      | AUUUUUUUUCUCUGA   | GAUCAUCAAAGAAGUG  | Cleava |   |
| 1_40   | 202    | 3   | .1 | 1 | 20 | 1338 | 1357 | UGAUC             | GAGU              | ge     | 1 |
| snorf_ | Bra015 |     | 15 |   |    |      |      | AUUUUUUUUCUCUGA   | GGUUUAUCAAGGAAAUG | Cleava |   |
| 1_40   | 229    | 3   | .5 | 1 | 20 | 855  | 874  | UGAUC             | AAAU              | ge     | 1 |
| snorf_ | Bra025 |     | 10 |   |    |      |      | AUUUUUUUUCUCUGA   | GAUCAAGAGAGAAAUA  | Cleava |   |
| 1_40   | 087    | 3   | .9 | 1 | 20 | 1056 | 1075 | UGAUC             | AAAG              | ge     | 1 |
| snorf_ | Bra038 |     | 8. |   |    |      |      | UGAUUGACUAUUUUUCG | GAUCCAGAGGAAAUG   | Cleava |   |
| 1_41   | 991    | 1.5 | 0  | 1 | 24 | 149  | 172  | UCUGAUUC          | GUCAAUCA          | ge     | 1 |
| snorf_ | Bra028 |     | 16 |   |    |      |      | UGAUUGACUAUUUUUCG | UCAGAUGAAGAUAUUC  | Cleava |   |
| 1_41   | 512    | 2   | .1 | 1 | 21 | 754  | 774  | UCUGA             | AAUCA             | ge     | 1 |
| snorf_ | Bra011 |     | 19 |   |    |      |      | UGAUUGACUAUUUUUCG | UUGGACGAUAAUAAUC  | Cleava |   |
| 1_41   | 790    | 3   | .9 | 1 | 21 | 697  | 717  | UCUGA             | AAUCA             | ge     | 1 |
| snorf_ | Bra025 |     | 20 |   |    |      |      | UGAUUGACUAUUUUUCG | UCUGAUGAAGAUAUUC  | Cleava |   |
| 1_41   | 458    | 3   | .7 | 1 | 21 | 844  | 864  | UCUGA             | AAUCA             | ge     | 1 |
| snorf_ | Bra016 | 3   | 16 | 1 | 20 | 632  | 651  | UGAUUGACUAUUUUUCG | CAUAUGCAAUGGUCA   | Cleava | 1 |

|        |        |     |    |   |    |      |      |                  |                  |        |   |
|--------|--------|-----|----|---|----|------|------|------------------|------------------|--------|---|
| 1_41   | 942    |     | .5 |   |    |      |      | UCUG             | AUCA             | ge     |   |
| snorf_ | Bra028 |     | 14 |   |    |      |      | AUUGACUAUUUUCGUC | GGUCAGAGGAAAAGAG | Cleava |   |
| 1_42   | 945    | 2.5 | .7 | 1 | 21 | 1924 | 1944 | UGAUU            | UCAAU            | ge     | 1 |
| snorf_ | Bra034 |     | 13 |   |    |      |      | AUUGACUAUUUUCGUC | ACUCAGACUAAGAUGG | Cleava |   |
| 1_42   | 795    | 3   | .9 | 1 | 21 | 1072 | 1092 | UGAUU            | UCAAU            | ge     | 1 |
| snorf_ | Bra024 |     | 20 |   |    |      |      | AUUGACUAUUUUCGUC | GAUAAGACGAAAAGAG | Cleava |   |
| 1_42   | 432    | 3   | .2 | 1 | 21 | 424  | 444  | UGAUU            | UCAAG            | ge     | 1 |
| snorf_ | Bra038 |     | 7. |   |    |      |      | GAUUGACUAUUUUCGU | GAUCCAGAGGAAAAUG | Cleava |   |
| 1_43   | 991    | 2.5 | 5  | 1 | 23 | 149  | 171  | CUGAUUC          | GUCAAUC          | ge     | 1 |
| snorf_ | Bra028 |     | 16 |   |    |      |      | GAUUGACUAUUUUCGU | UCAGAUGAAGAUAUUC | Cleava |   |
| 1_43   | 512    | 2.5 | .0 | 1 | 20 | 754  | 773  | CUGA             | AAUC             | ge     | 1 |
| snorf_ | Bra034 |     | 13 |   |    |      |      | GAUUGACUAUUUUCGU | ACUCAGACUAAGAUGG | Cleava |   |
| 1_43   | 795    | 3   | .3 | 1 | 22 | 1072 | 1093 | CUGAUU           | UCAAUG           | ge     | 1 |
| snorf_ | Bra038 |     | 8. |   |    |      |      | GUGAUUGACUAUUUUC | GAUCCAGAGGAAAAUG | Cleava |   |
| 1_44   | 991    | 2   | 7  | 1 | 25 | 149  | 173  | GUCUGAUUC        | GUCAAUCAU        | ge     | 1 |
| snorf_ | Bra026 |     | 17 |   |    |      |      | GUGAUUGACUAUUUUC | AGAUGAAAGUAGCCAG | Cleava |   |
| 1_44   | 885    | 3   | .6 | 1 | 20 | 1124 | 1143 | GUCU             | UUAC             | ge     | 1 |
| snorf_ | Bra039 |     | 15 |   |    |      |      | CUAAAUGGGAAUCUCU | UCAGGGAGAUUCUCAU | Cleava |   |
| 1_48   | 448    | 1   | .3 | 1 | 20 | 820  | 839  | CUGA             | UUAG             | ge     | 1 |
| snorf_ | Bra034 |     | 14 |   |    |      |      | CUAAAUGGGAAUCUCU | CCAGAGAGAUUCUUAU | Cleava |   |
| 1_48   | 045    | 2   | .4 | 1 | 20 | 135  | 154  | CUGA             | UUAG             | ge     | 1 |
| snorf_ | Bra029 |     | 14 |   |    |      |      | CUAAAUGGGAAUCUCU | CCAGAGAAAUUCUUAU | Cleava |   |
| 1_48   | 738    | 3   | .8 | 1 | 20 | 135  | 154  | CUGA             | UUAG             | ge     | 1 |
| snorf_ | Bra039 |     | 16 |   |    |      |      | AAAUGGGAAUCUCUCU | ACUCAGGGAGAUUCUC | Cleava |   |
| 1_49   | 448    | 3   | .6 | 1 | 20 | 818  | 837  | GAUG             | AUUU             | ge     | 1 |
| snorf_ | Bra003 |     | 16 |   |    |      |      | AAAUGGGAAUCUCUCU | CACCGGAGAGAUUCCU | Cleava |   |
| 1_49   | 227    | 2.5 | .1 | 1 | 20 | 888  | 907  | GAUG             | GUUU             | ge     | 1 |
| snorf_ | Bra035 |     | 21 |   |    |      |      | AAAUGGGAAUCUCUCU | CAUGAGAGAGGUUUC  | Cleava |   |
| 1_49   | 134    | 3   | .8 | 1 | 20 | 2055 | 2074 | GAUG             | AUUG             | ge     | 1 |
| snorf_ | Bra007 |     | 10 |   |    |      |      | AAAUGGGAAUCUCUCU | CACCAGGUAGAUUCCC | Cleava |   |
| 1_49   | 474    | 2.5 | .5 | 1 | 20 | 14   | 33   | GAUG             | AUUU             | ge     | 1 |
| snorf_ | Bra004 |     | 20 |   |    |      |      | AUCCUUCCUUGGAUGU | UAUCAGACGUUCAAGG | Cleava |   |
| 1_50   | 473    | 2   | .8 | 1 | 22 | 647  | 668  | CUGAAA           | AGGGGU           | ge     | 1 |
| snorf_ | Bra029 | 1.5 | 20 | 1 | 20 | 1518 | 1537 | AUCCUUCCUUGGAUGU | UCAGACGACCAAGGAA | Cleava | 1 |

|        |        |     |    |   |    |      |      |                   |                  |        |   |
|--------|--------|-----|----|---|----|------|------|-------------------|------------------|--------|---|
| 1_50   | 073    |     | .1 |   |    |      |      | CUGA              | GGAU             | ge     |   |
| snorf_ | Bra019 |     | 17 |   |    |      |      | AUCCUUCCUUGGAUGU  | UCCAGGCAUCCGGGGA | Cleava |   |
| 1_50   | 832    | 2.5 | .3 | 1 | 21 | 493  | 513  | CUGAA             | AGGAU            | ge     | 1 |
| snorf_ | Bra001 |     | 23 |   |    |      |      | AUCCUUCCUUGGAUGU  | AUUUUCAGAGAUCCGA | Cleava |   |
| 1_50   | 797    | 3   | .7 | 1 | 24 | 158  | 181  | CUGAAACU          | AGGAGGAU         | ge     | 1 |
| snorf_ | Bra009 |     | 18 |   |    |      |      | AUCCUUCCUUGGAUGU  | UCAGGCUUCCAGGGAA | Cleava |   |
| 1_50   | 240    | 2   | .3 | 1 | 20 | 685  | 704  | CUGA              | GGAU             | ge     | 1 |
| snorf_ | Bra003 |     | 19 |   |    |      |      | AUCCUUCCUUGGAUGU  | UCGGACGACCAAGGAG | Cleava |   |
| 1_50   | 063    | 2.5 | .4 | 1 | 20 | 1602 | 1621 | CUGA              | GGAU             | ge     | 1 |
| snorf_ | Bra006 |     | 22 |   |    |      |      | AUCCUUCCUUGGAUGU  | UCAGGUGUCCGAUGAA | Cleava |   |
| 1_50   | 952    | 3   | .5 | 1 | 20 | 968  | 987  | CUGA              | GGAU             | ge     | 1 |
| snorf_ | Bra035 |     | 14 |   |    |      |      | AUCCUUCCUUGGAUGU  | UCAGACCUCCAAAGAA | Cleava |   |
| 1_50   | 233    | 3   | .9 | 1 | 20 | 317  | 336  | CUGA              | GGAG             | ge     | 1 |
| snorf_ | Bra023 |     | 18 |   |    |      |      | UGGCAGUGAUGAUUG   | UGUUCUCAUGAUGAU  | Transl |   |
| 1_2    | 739    | 3   | .4 | 1 | 21 | 879  | 899  | AGAAUG            | UGCCA            | ation  | 1 |
| snorf_ | Bra040 |     | 17 |   |    |      |      | GAGCUGUGA-        | UCUGAUUAUCAUCACA | Transl |   |
| 1_6    | 986    | 3   | .9 | 1 | 19 | 3393 | 3412 | UGAUUUUAGG        | GCUC             | ation  | 1 |
| snorf_ | Bra000 |     | 16 |   |    |      |      | GAAAGUGAUGAUAAAGG | CAAUUCCUUUUGAUCA | Transl |   |
| 1_7    | 657    | 2.5 | .6 | 1 | 21 | 37   | 57   | AAUUG             | UUUUC            | ation  | 1 |
| snorf_ | Bra013 |     | 5. |   |    |      |      | GAAAGUGAUGAUAAAGG | CUAAAAUUUCUUAUCC | Transl |   |
| 1_7    | 119    | 3   | 8  | 1 | 24 | 853  | 876  | AAUUGUCG          | UCUCUUUC         | ation  | 1 |
| snorf_ | Bra039 |     | 11 |   |    |      |      | GAAAGUGAUGAUAAAGG | UAAUGUCCUUAACAUC | Transl |   |
| 1_7    | 389    | 3   | .8 | 1 | 21 | 1248 | 1269 | A-AUUG            | ACUUUC           | ation  | 1 |
| snorf_ | Bra000 |     | 16 |   |    |      |      | GAAAGUGAUGAUAAAGG | CAAUUCCUUUUGAUCA | Transl |   |
| 1_8    | 657    | 2.5 | .6 | 1 | 21 | 37   | 57   | AAUUG             | UUUUC            | ation  | 1 |
| snorf_ | Bra013 |     | 5. |   |    |      |      | GAAAGUGAUGAUAAAGG | AAAAUUUCUUAUCCUC | Transl |   |
| 1_8    | 119    | 3   | 8  | 1 | 22 | 855  | 876  | AAUUGU            | UCUUUC           | ation  | 1 |
| snorf_ | Bra039 |     | 11 |   |    |      |      | GAAAGUGAUGAUAAAGG | UAAUGUCCUUAACAUC | Transl |   |
| 1_8    | 389    | 3   | .8 | 1 | 21 | 1248 | 1269 | A-AUUG            | ACUUUC           | ation  | 1 |
| snorf_ | Bra016 |     | 17 |   |    |      |      | AUACAGUGAUGAGAUUA | UUUGUUUAUCUGAUU  | Transl |   |
| 1_9    | 643    | 2.5 | .3 | 1 | 22 | 82   | 103  | AGCAGA            | ACUGUGU          | ation  | 1 |
| snorf_ | Bra012 |     | 15 |   |    |      |      | AUACAGUGAUGAGAUUA | CUGCUUGUCUUCUUGC | Transl |   |
| 1_9    | 204    | 3   | .6 | 1 | 21 | 377  | 397  | AGCAG             | UGUAU            | ation  | 1 |
| snorf_ | Bra030 | 2.5 | 17 | 1 | 20 | 432  | 451  | UCAAGCAAUGUCUAG   | AGGUCUAGAGGUUGCU | Transl | 1 |

|        |        |     |    |   |    |      |      |                  |                  |        |   |
|--------|--------|-----|----|---|----|------|------|------------------|------------------|--------|---|
| 1_13   | 700    |     | .6 |   |    |      |      | AUUU             | UUGA             | ation  |   |
| snorf_ | Bra005 |     | 21 |   |    |      |      | UCAAAGCAAUGUCUAG | GGAGCUAGAGAUUGCU | Transl |   |
| 1_13   | 206    | 3   | .1 | 1 | 20 | 2649 | 2668 | AUUU             | UUGA             | ation  | 1 |
| snorf_ | Bra013 |     | 19 |   |    |      |      | UCAAAGCAAUGUCUAG | AAGUUUAGAC-      | Transl |   |
| 1_13   | 921    | 3   | .1 | 1 | 20 | 592  | 610  | AUUU             | UUGCUUUGA        | ation  | 1 |
| snorf_ | Bra001 |     | 17 |   |    |      |      | CUUCCUUGGAUGUCUG | GUUUCAGGUAGCCAAG | Transl |   |
| 1_16   | 502    | 3   | .6 | 1 | 20 | 520  | 539  | AAAC             | GAAA             | ation  | 1 |
| snorf_ | Bra003 |     | 16 |   |    |      |      | CUUCCUUGGAUGUCUG | GUUUCAGACAAUCAAC | Transl |   |
| 1_16   | 592    | 3   | .0 | 1 | 20 | 282  | 301  | AAAC             | GAAG             | ation  | 1 |
| snorf_ | Bra035 |     | 15 |   |    |      |      | CUUCCUUGGAUGUCUG | GUUUCAGACAAUCAAC | Transl |   |
| 1_16   | 143    | 3   | .7 | 1 | 20 | 282  | 301  | AAAC             | GAAG             | ation  | 1 |
| snorf_ | Bra002 |     | 13 |   |    |      |      | AACGAGGCAUUUGUCU | UUCUCUUAGACAAAAA | Transl |   |
| 1_17   | 768    | 3   | .9 | 1 | 23 | 1583 | 1605 | GAGAGAA          | CUUCGUU          | ation  | 1 |
| snorf_ | Bra009 |     | 18 |   |    |      |      | AACGAGGC-        | UUUGCUCAGAUAAAUA | Transl |   |
| 1_17   | 103    | 3   | .4 | 1 | 23 | 1009 | 1032 | AUUUGUCUGAGAGAA  | GCUUCGUU         | ation  | 1 |
| snorf_ | Bra039 |     | 17 |   |    |      |      | UCUACCCAUAUUUAU  | UCAGAUUAAAGUGGG  | Transl |   |
| 1_18   | 525    | 3   | .0 | 1 | 20 | 2797 | 2816 | CUGA             | AAGA             | ation  | 1 |
| snorf_ | Bra037 |     | 23 |   |    |      |      | UGAUUAAAAACUAUCA | UCUGAAGAGCUGAUGU | Transl |   |
| 1_25   | 647    | 3   | .4 | 1 | 26 | 1570 | 1595 | GCUCUGAGGG       | CUUUUGAUC        | ation  | 1 |
| snorf_ | Bra001 |     | 15 |   |    |      |      | UAUGGAGACCUGAACU | UUCAUUCAGUUUAGAU | Transl |   |
| 1_26   | 667    | 3   | .3 | 1 | 23 | 189  | 211  | GAGUGGA          | UUCCAUG          | ation  | 1 |
| snorf_ | Bra024 |     | 23 |   |    |      |      | UAUGGAGACCUGAACU | ACUCAGUUCGAGUCUC | Transl |   |
| 1_26   | 602    | 3   | .3 | 1 | 20 | 593  | 612  | GAGU             | CAAA             | ation  | 1 |
| snorf_ | Bra016 |     | 17 |   |    |      |      | UAUGGAGACCUGAACU | ACUCAGUUCGAGUCUC | Transl |   |
| 1_26   | 345    | 3   | .3 | 1 | 20 | 671  | 690  | GAGU             | CAAA             | ation  | 1 |
| snorf_ | Bra003 |     | 22 |   |    |      |      | UGUUACACACACUGAG | UAGUCUCGGCGCGUGU | Transl |   |
| 1_31   | 960    | 3   | .6 | 1 | 20 | 873  | 892  | GCUA             | AACA             | ation  | 1 |
| snorf_ | Bra040 |     | 17 |   |    |      |      | UCAAGUUUGGCUAUUC | GCAUCUCACAGAAUAG | Transl |   |
| 1_35   | 779    | 3   | .4 | 1 | 26 | 871  | 896  | UGUUACAUUC       | CAGAAUUUGA       | ation  | 1 |
| snorf_ | Bra002 |     | 15 |   |    |      |      | UCAAGUUUGGCUAUUC | AAUGGAAUAGCAAAAC | Transl |   |
| 1_35   | 352    | 2   | .8 | 1 | 20 | 841  | 860  | UGUU             | UUGA             | ation  | 1 |
| snorf_ | Bra035 |     | 10 |   |    |      |      | UCAAGUUUGGCUAUUC | UCACAGAAUAGCAGAA | Transl |   |
| 1_35   | 539    | 2.5 | .0 | 1 | 21 | 1092 | 1112 | UGUUA            | CUUGA            | ation  | 1 |
| snorf_ | Bra011 | 2   | 9. | 1 | 20 | 499  | 518  | UCAAGUUUGGCUAUUC | AACAAAAUAGGCAAAC | Transl | 1 |

|        |        |     |    |   |    |      |      |                  |                  |        |   |
|--------|--------|-----|----|---|----|------|------|------------------|------------------|--------|---|
| 1_35   | 260    |     | 2  |   |    |      |      | UGUU             | UUGA             | ation  |   |
| snorf_ | Bra007 |     | 17 |   |    |      |      | UCAAGUUUGGCUAUUC | AACAGAAUAGCAAAAC | Transl |   |
| 1_35   | 263    | 2.5 | .3 | 1 | 20 | 1363 | 1382 | UGUU             | AUGA             | ation  | 1 |
| snorf_ | Bra032 |     | 17 |   |    |      |      | ACUGUUUUACUCGGUG | UCUCUCCACCGCGUC  | Transl |   |
| 1_36   | 960    | 3   | .8 | 1 | 23 | 521  | 543  | GCAGAAA          | AAACAGU          | ation  | 1 |
| snorf_ | Bra027 |     | 19 |   |    |      |      | ACUGUUUUACUCGGUG | CUGCCACUGAGGUAAA | Transl |   |
| 1_36   | 641    | 2.5 | .4 | 1 | 20 | 2087 | 2106 | GCAG             | CAGU             | ation  | 1 |
| snorf_ | Bra034 |     | 21 |   |    |      |      | CUAGAAAGCUUAAUCU | AAGCAGAUUAUGUUUU | Transl |   |
| 1_39   | 403    | 3   | .9 | 1 | 20 | 482  | 501  | GAUU             | CUGG             | ation  | 1 |
| snorf_ | Bra002 |     | 15 |   |    |      |      | AUUUUUUAUUCUCUGA | UAUCAUCAGUGAAAUA | Transl |   |
| 1_40   | 333    | 3   | .8 | 1 | 20 | 2337 | 2356 | UGAUC            | AAAC             | ation  | 1 |
| snorf_ | Bra024 |     | 13 |   |    |      |      | AUUUUUUAUUCUCUGA | GAUCAUCAGAGCAAUA | Transl |   |
| 1_40   | 670    | 3   | .0 | 1 | 20 | 504  | 523  | UGAUC            | GGAG             | ation  | 1 |
| snorf_ | Bra014 |     | 20 |   |    |      |      | AUUUUUUAUUCUCUGA | GAUCAUCAGAUAGAGA | Transl |   |
| 1_40   | 869    | 3   | .1 | 1 | 20 | 166  | 185  | UGAUC            | AAAU             | ation  | 1 |
| snorf_ | Bra028 |     | 18 |   |    |      |      | AUUUUUUAUUCUCUGA | GAUCAUGAGAAAGAUG | Transl |   |
| 1_40   | 506    | 3   | .3 | 1 | 20 | 55   | 74   | UGAUC            | AAAU             | ation  | 1 |
| snorf_ | Bra011 |     | 17 |   |    |      |      | UGAUUGACUAUUUUCG | AUCAGAGGAAAUUAGU | Transl |   |
| 1_41   | 753    | 3   | .5 | 1 | 22 | 96   | 117  | UCUGAU           | CAAUUCU          | ation  | 1 |
| snorf_ | Bra005 |     | 15 |   |    |      |      | UGAUUGACUAUUUUCG | GGUCAGAGGAAAAAAG | Transl |   |
| 1_41   | 646    | 3   | .8 | 1 | 23 | 318  | 340  | UCUGAUU          | UCGGUCA          | ation  | 1 |
| snorf_ | Bra011 |     | 15 |   |    |      |      | AUUGACUAUUUUCGUC | AUCAGAGGAAAUUAGU | Transl |   |
| 1_42   | 753    | 2   | .2 | 1 | 20 | 96   | 115  | UGAU             | CAAU             | ation  | 1 |
| snorf_ | Bra011 |     | 16 |   |    |      |      | GAUUGACUAUUUUCGU | AUCAGAGGAAAUUAGU | Transl |   |
| 1_43   | 753    | 2   | .9 | 1 | 21 | 96   | 116  | CUGAU            | CAAUC            | ation  | 1 |
| snorf_ | Bra028 |     | 16 |   |    |      |      | GAUUGACUAUUUUCGU | GGUCAGAGGAAAAGAG | Transl |   |
| 1_43   | 945    | 3   | .0 | 1 | 22 | 1924 | 1945 | CUGAUU           | UCAAUG           | ation  | 1 |
| snorf_ | Bra005 |     | 15 |   |    |      |      | GAUUGACUAUUUUCGU | GGUCAGAGGAAAAAAG | Transl |   |
| 1_43   | 646    | 3   | .3 | 1 | 22 | 318  | 339  | CUGAUU           | UCGGUC           | ation  | 1 |
| snorf_ | Bra039 |     | 24 |   |    |      |      | GAUUGACUAUUUUCGU | UCAGAGGAGAGAAGUC | Transl |   |
| 1_43   | 494    | 3   | .5 | 1 | 20 | 1051 | 1070 | CUGA             | AAUC             | ation  | 1 |
| snorf_ | Bra028 |     | 16 |   |    |      |      | GUGAUUGACUAUUUUC | UCAGAUGAAGAUUUUC | Transl |   |
| 1_44   | 512    | 3   | .1 | 1 | 22 | 754  | 775  | GUCUGA           | AAUCAG           | ation  | 1 |
| snorf_ | Bra011 | 3   | 22 | 1 | 22 | 697  | 718  | GUGAUUGACUAUUUUC | UUGGACGAUAAUAAUC | Transl | 1 |



|        |        |   |    |   |    |    |     |                 |                  |        |   |
|--------|--------|---|----|---|----|----|-----|-----------------|------------------|--------|---|
| 1_44   | 790    |   | .5 |   |    |    |     | GUCUGA          | AAUCAU           | ation  |   |
| snorf_ | Bra029 |   | 24 |   |    |    |     | AUCCUCCUUGGAUGU | UCUCAGAUAGCCACGG | Transl |   |
| 1_50   | 373    | 3 | .9 | 1 | 22 | 94 | 115 | CUGAAA          | GAGGAU           | ation  | 1 |

### snoRF Apical meristem

| ncRNA<br>_Acc. | Target<br>_Acc. | Expect<br>ation | U<br>PE | ncRNA_<br>start | ncRNA_<br>_end | Target_<br>start | Target_<br>_end | ncRNA_aligned_fragme<br>nt | Target_aligned_fragme<br>nt | Inhibiti<br>on | Multip<br>licity |
|----------------|-----------------|-----------------|---------|-----------------|----------------|------------------|-----------------|----------------------------|-----------------------------|----------------|------------------|
| snorf_         | Bra005          |                 | 17      |                 |                |                  |                 | AGCCGAUGAGGACAUC           | UGGUCUCAUGUCUUU             | Cleava         |                  |
| 2_1            | 579             | 3               | .4      | 1               | 22             | 993              | 1014            | AGAUUA                     | AUUGGCU                     | ge             | 1                |
| snorf_         | Bra030          |                 | 23      |                 |                |                  |                 | AGCCGAUGAGGACAUC           | GUCUAGUGUCUUCAU             | Cleava         |                  |
| 2_1            | 320             | 3               | .9      | 1               | 20             | 42               | 61              | AGAU                       | UGGCU                       | ge             | 1                |
| snorf_         | Bra015          |                 | 16      |                 |                |                  |                 | AGGCAGUGAUGAUUG            | ACAUUCUCGAUGGUCA            | Transl         |                  |
| 2_2            | 439             | 3               | .8      | 1               | 22             | 292              | 313             | AGAAUGU                    | UUGCUU                      | ation          | 1                |
| snorf_         | Bra000          |                 | 24      |                 |                |                  |                 | AGGCAGUGAUGAUUG            | GAAAUUCUCAAGAAUC            | Transl         |                  |
| 2_2            | 424             | 2.5             | .3      | 1               | 23             | 903              | 925             | AGAAUGUC                   | AUUGCCU                     | ation          | 1                |
| snorf_         | Bra040          |                 | 22      |                 |                |                  |                 | AGGCAGUGAUGAUUG            | GAAAUUCUCAAGAAUC            | Transl         |                  |
| 2_2            | 348             | 2.5             | .4      | 1               | 23             | 435              | 457             | AGAAUGUC                   | AUUGCCU                     | ation          | 1                |
| snorf_         | Bra019          |                 | 9.      |                 |                |                  |                 | AGGCAGUGAUGAUUG            | GUAUUCUUCAUCUUC             | Transl         |                  |
| 2_2            | 100             | 3               | 4       | 1               | 22             | 322              | 343             | AGAAUGU                    | AUUGCCU                     | ation          | 1                |
| snorf_         | Bra026          |                 | 11      |                 |                |                  |                 | AGGCAGUGAUGAUUG            | GUAUUCUUCAUCUUC             | Transl         |                  |
| 2_2            | 423             | 3               | .8      | 1               | 22             | 304              | 325             | AGAAUGU                    | AUUGCCU                     | ation          | 1                |
| snorf_         | Bra023          |                 | 11      |                 |                |                  |                 | AGGCAGUGAUGAUUG            | AAAUCCUCAUAUAUGA            | Transl         |                  |
| 2_2            | 810             | 3               | .8      | 1               | 22             | 290              | 311             | AGAAUGU                    | CUGCCU                      | ation          | 1                |
| snorf_         | Bra033          |                 | 12      |                 |                |                  |                 | UGGCAGUGAUGAUUG            | GACAAUCUCAACAUC             | Cleava         |                  |
| 2_3            | 534             | 3               | .5      | 1               | 23             | 1050             | 1072            | AGAAUGUC                   | ACUGCUG                     | ge             | 1                |
| snorf_         | Bra012          |                 | 15      |                 |                |                  |                 | UGGCAGUGAUGAUUG            | GACAAUCUCAACAUC             | Cleava         |                  |
| 2_3            | 741             | 3               | .1      | 1               | 23             | 531              | 553             | AGAAUGUC                   | ACUGCUG                     | ge             | 1                |
| snorf_         | Bra010          |                 | 4.      |                 |                |                  |                 | UGGCAGUGAUGAUUG            | ACUUUCUCCAUCAUCA            | Cleava         |                  |
| 2_3            | 085             | 3               | 5       | 1               | 22             | 531              | 552             | AGAAUGU                    | UUGUCA                      | ge             | 1                |
| snorf_         | Bra026          |                 | 13      |                 |                |                  |                 | UGGCAGUGAUGAUUG            | CUGCUCAAUCAUCGCU            | Cleava         |                  |
| 2_3            | 106             | 3               | .2      | 1               | 20             | 2324             | 2343            | AGAAU                      | GCUA                        | ge             | 1                |
| snorf_         | Bra023          | 3               | 18      | 1               | 21             | 879              | 899             | UGGCAGUGAUGAUUG            | UGUUCUCAUAUGAUGA            | Transl         | 1                |

|        |        |     |    |   |    |      |      |                   |                   |        |   |
|--------|--------|-----|----|---|----|------|------|-------------------|-------------------|--------|---|
| 2_3    | 739    |     | .4 |   |    |      |      | AGAAUG            | UUGCCA            | ation  |   |
| snorf_ | Bra030 |     | 15 |   |    |      |      | GCUGUGAAGAUAAAGAA | AAUUGUUCCUAUCUU   | Cleava |   |
| 2_4    | 271    | 2.5 | .7 | 1 | 21 | 328  | 348  | CAAUU             | CAUGGU            | ge     | 1 |
| snorf_ | Bra014 |     | 10 |   |    |      |      | GCUGUGAAGAUAAAGAA | CUUGUUCUCAUCUUCA  | Cleava |   |
| 2_4    | 329    | 3   | .3 | 1 | 20 | 517  | 536  | CAAU              | UGGC              | ge     | 1 |
| snorf_ | Bra014 |     | 17 |   |    |      |      | GCUGUGAAGAUAAAGAA | AUUGUUCUUCUCUUU   | Transl |   |
| 2_4    | 071    | 3   | .3 | 1 | 20 | 469  | 488  | CAAU              | ACAAC             | ation  | 1 |
| snorf_ | Bra007 |     | 20 |   |    |      |      | GCUGUGAAGAUAAAGAA | UCAGUGUUCUUAUGU   | Transl |   |
| 2_4    | 474    | 3   | .5 | 1 | 22 | 3388 | 3409 | CAAUUA            | UUACAGU           | ation  | 1 |
| snorf_ | Bra013 |     | 20 |   |    |      |      | GCUGUGAAGAUAAAGAA | AUUGUUCUGACCUUC   | Transl |   |
| 2_4    | 538    | 3   | .2 | 1 | 20 | 536  | 555  | CAAU              | ACAGA             | ation  | 1 |
| snorf_ | Bra036 |     | 20 |   |    |      |      | AAAGAUGAUGAAUAU   | AGUGUUUAUUCAUCA   | Cleava |   |
| 2_6    | 097    | 2.5 | .1 | 1 | 20 | 1398 | 1417 | GCACU             | UCUUG             | ge     | 1 |
| snorf_ | Bra030 |     | 20 |   |    |      |      | AAAGAUGAUGAAUAU   | AGUGUUUAUUCAUCA   | Cleava |   |
| 2_6    | 023    | 2.5 | .7 | 1 | 20 | 1215 | 1234 | GCACU             | UCUUG             | ge     | 1 |
| snorf_ | Bra036 |     | 15 |   |    |      |      | AAAGAUGAUGAAUAU   | AAUGCAUCAUCAUCA   | Cleava |   |
| 2_6    | 690    | 3   | .2 | 1 | 20 | 1129 | 1148 | GCACU             | CUUU              | ge     | 1 |
| snorf_ | Bra022 |     | 16 |   |    |      |      | GAGCUGUGAUGAUAU   | CCCUAAUGUUGUCACA  | Cleava |   |
| 2_7    | 523    | 3   | .4 | 1 | 20 | 288  | 307  | UAGGC             | GUUC              | ge     | 1 |
| snorf_ | Bra035 |     | 20 |   |    |      |      | GAGCUGUGAUGAUAU   | GCCUAGUCUCGUCACG  | Cleava |   |
| 2_7    | 613    | 2.5 | .7 | 1 | 20 | 153  | 172  | UAGGC             | GCUC              | ge     | 1 |
| snorf_ | Bra000 |     | 12 |   |    |      |      | GAGCUGUGAUGAUAU   | GUUUAAUAAUAUCACA  | Cleava |   |
| 2_7    | 855    | 3   | .5 | 1 | 20 | 1892 | 1911 | UAGGC             | GCUU              | ge     | 1 |
| snorf_ | Bra032 |     | 18 |   |    |      |      | GAGCUGUGAUGAUAU   | GUCCGAUAUCAUACA   | Cleava |   |
| 2_7    | 852    | 3   | .5 | 1 | 20 | 857  | 876  | UAGGC             | GCUU              | ge     | 1 |
| snorf_ | Bra026 |     | 18 |   |    |      |      | GAGCUGUGAUGAUAU   | GGUCUAAUCACAUCAC  | Cleava |   |
| 2_7    | 759    | 3   | .1 | 1 | 21 | 202  | 222  | UAGGCU            | AGUUC             | ge     | 1 |
| snorf_ | Bra004 |     | 19 |   |    |      |      | GAGCUGUGAUGAUAU   | GCCUGAUCUCAUGACA  | Cleava |   |
| 2_7    | 297    | 3   | .0 | 1 | 20 | 621  | 640  | UAGGC             | GUUC              | ge     | 1 |
| snorf_ | Bra040 |     | 17 |   |    |      |      | GAGCUGUGA-        | UCUGAUUAUCAAUCACA | Transl |   |
| 2_7    | 986    | 3   | .9 | 1 | 19 | 3393 | 3412 | UGAUUAUAGG        | GCUC              | ation  | 1 |
| snorf_ | Bra022 |     | 16 |   |    |      |      | GAGCUGUGAUGAUAU   | CCCUAAUGUUGUCACA  | Cleava |   |
| 2_9    | 523    | 3   | .4 | 1 | 20 | 288  | 307  | UAGGC             | GUUC              | ge     | 1 |
| snorf_ | Bra035 | 2.5 | 20 | 1 | 20 | 153  | 172  | GAGCUGUGAUGAUAU   | GCCUAGUCUCGUCACG  | Cleava | 1 |

|        |        |     |    |   |    |      |      |                 |                   |        |   |
|--------|--------|-----|----|---|----|------|------|-----------------|-------------------|--------|---|
| 2_9    | 613    |     | .7 |   |    |      |      | UAGGC           | GCUC              | ge     |   |
| snorf_ | Bra000 |     | 12 |   |    |      |      | GAGCUGUGAUGAUAU | GUUUAAUAAUAUCACA  | Cleava |   |
| 2_9    | 855    | 3   | .5 | 1 | 20 | 1892 | 1911 | UAGGC           | GCUU              | ge     | 1 |
| snorf_ | Bra032 |     | 18 |   |    |      |      | GAGCUGUGAUGAUAU | GUCCGAUAUCAUUACA  | Cleava |   |
| 2_9    | 852    | 3   | .5 | 1 | 20 | 857  | 876  | UAGGC           | GCUU              | ge     | 1 |
| snorf_ | Bra026 |     | 18 |   |    |      |      | GAGCUGUGAUGAUAU | GUCUAAUCACAUCACA  | Cleava |   |
| 2_9    | 759    | 3   | .1 | 1 | 20 | 203  | 222  | UAGGC           | GUUC              | ge     | 1 |
| snorf_ | Bra004 |     | 19 |   |    |      |      | GAGCUGUGAUGAUAU | GCCUGAUCUCAUGACA  | Cleava |   |
| 2_9    | 297    | 3   | .0 | 1 | 20 | 621  | 640  | UAGGC           | GUUC              | ge     | 1 |
| snorf_ | Bra040 |     | 17 |   |    |      |      | GAGCUGUGA-      | UCUGAUUAUCAAUCACA | Transl |   |
| 2_9    | 986    | 3   | .9 | 1 | 19 | 3393 | 3412 | UGAUUUUAGG      | GCUC              | ation  | 1 |
| snorf_ | Bra026 |     | 18 |   |    |      |      | GAGCUGUGAUGAUAU | UAUGGUCUAAUCACAU  | Cleava |   |
| 2_10   | 759    | 3   | .1 | 1 | 24 | 199  | 222  | UAGGCUUUA       | CACAGUUC          | ge     | 1 |
| snorf_ | Bra022 |     | 16 |   |    |      |      | GAGCUGUGAUGAUAU | CCCUAAUGUUGUCACA  | Cleava |   |
| 2_10   | 523    | 3   | .4 | 1 | 20 | 288  | 307  | UAGGC           | GUUC              | ge     | 1 |
| snorf_ | Bra035 |     | 20 |   |    |      |      | GAGCUGUGAUGAUAU | GCCUAGUCUCGUCACG  | Cleava |   |
| 2_10   | 613    | 2.5 | .7 | 1 | 20 | 153  | 172  | UAGGC           | GCUC              | ge     | 1 |
| snorf_ | Bra004 |     | 19 |   |    |      |      | GAGCUGUGAUGAUAU | UUCAUGCCUGAUCUCA  | Cleava |   |
| 2_10   | 297    | 3   | .0 | 1 | 25 | 616  | 640  | UAGGCUUUAG      | UGACAGUUC         | ge     | 1 |
| snorf_ | Bra000 |     | 12 |   |    |      |      | GAGCUGUGAUGAUAU | AUGUUUAAUAAUAUC   | Cleava |   |
| 2_10   | 855    | 3   | .5 | 1 | 22 | 1890 | 1911 | UAGGCUU         | ACAGCUU           | ge     | 1 |
| snorf_ | Bra032 |     | 18 |   |    |      |      | GAGCUGUGAUGAUAU | GUCCGAUAUCAUUACA  | Cleava |   |
| 2_10   | 852    | 3   | .5 | 1 | 20 | 857  | 876  | UAGGC           | GCUU              | ge     | 1 |
| snorf_ | Bra037 |     | 11 |   |    |      |      | GAGCUGUGAUGAUAU | UCCAAAUCUCAUCAUA  | Cleava |   |
| 2_11   | 392    | 3   | .0 | 1 | 20 | 319  | 338  | UUGGC           | GCUU              | ge     | 1 |
| snorf_ | Bra039 |     | 19 |   |    |      |      | GAGCUGUGAUGAUAU | GUUGGAUCUCAUCACA  | Cleava |   |
| 2_11   | 067    | 3   | .5 | 1 | 20 | 409  | 428  | UUGGC           | GCUC              | ge     | 1 |
| snorf_ | Bra008 |     | 17 |   |    |      |      | GGUCUGUGAUGUUUG | AGUCUCAGACAUCAUA  | Cleava |   |
| 2_13   | 901    | 2.5 | .8 | 1 | 20 | 336  | 355  | AGAUU           | GGUC              | ge     | 1 |
| snorf_ | Bra036 |     | 21 |   |    |      |      | GGUCUGUGAUGUUUG | GAUCUCAAACAUCAUA  | Cleava |   |
| 2_13   | 315    | 3   | .7 | 1 | 20 | 1323 | 1342 | AGAUU           | GGUG              | ge     | 1 |
| snorf_ | Bra030 |     | 24 |   |    |      |      | GGUCUGUGAUGUUUG | GGUUUCGAACAUAUACA | Cleava |   |
| 2_13   | 783    | 3   | .4 | 1 | 20 | 915  | 934  | AGAUU           | GAUC              | ge     | 1 |
| snorf_ | Bra005 | 3   | 13 | 1 | 20 | 198  | 217  | GGUCUGUGAUGUUUG | GAUCUCGAGCUUCAUA  | Transl | 1 |

|        |        |     |    |   |    |      |      |                   |                  |        |   |
|--------|--------|-----|----|---|----|------|------|-------------------|------------------|--------|---|
| 2_13   | 532    |     | .5 |   |    |      |      | AGA UU            | GACC             | ation  |   |
| snorf_ | Bra032 |     | 21 |   |    |      |      | GGUCUGUGAUGUUUG   | GAUCUCAAGAGUUACA | Transl |   |
| 2_13   | 199    | 3   | .4 | 1 | 20 | 1426 | 1445 | AGA UU            | GACC             | ation  | 1 |
| snorf_ | Bra040 |     | 14 |   |    |      |      | GGUCUGUGAUGUUUG   | AAGAUCAAACAUCACA | Cleava |   |
| 2_13   | 723    | 2.5 | .0 | 1 | 20 | 783  | 802  | AGA UU            | GAUC             | ge     | 1 |
| snorf_ | Bra000 |     | 15 |   |    |      |      | GGUCUGUGAUGUUUG   | AGUCUCAAACAUGGUA | Cleava |   |
| 2_13   | 563    | 3   | .2 | 1 | 20 | 2185 | 2204 | AGA UU            | GACU             | ge     | 1 |
| snorf_ | Bra005 |     | 6. |   |    |      |      | GGUCUGUGAUGUUUG   | ACUCUCAAACAUCUCA | Cleava |   |
| 2_13   | 952    | 3   | 3  | 1 | 20 | 1961 | 1980 | AGA UU            | GAUC             | ge     | 1 |
| snorf_ | Bra030 |     | 14 |   |    |      |      | GGUCUGUGAUGUUUG   | AAGCUCAAUAUCACA  | Cleava |   |
| 2_13   | 576    | 3   | .0 | 1 | 20 | 2982 | 3001 | AGA UU            | GAGC             | ge     | 1 |
| snorf_ | Bra027 |     | 19 |   |    |      |      | GGUCUGUGAUGU-     | AAUUUCAAGAUUACAC | Cleava |   |
| 2_13   | 982    | 3   | .5 | 1 | 20 | 2302 | 2322 | UUGAGAUU          | AGACC            | ge     | 1 |
| snorf_ | Bra038 |     | 17 |   |    |      |      | GGUCUGUGAUGUUUG   | AAUCU-           | Cleava |   |
| 2_13   | 808    | 3   | .3 | 1 | 20 | 610  | 628  | AGA UU            | AAACAUCACGGACU   | ge     | 1 |
| snorf_ | Bra005 |     | 15 |   |    |      |      | GGCCGAUGAUUUUAAAU | UUGGAAUUACA UAAA | Cleava |   |
| 2_14   | 417    | 3   | .6 | 1 | 24 | 63   | 86   | AAUUUUGA          | UCAUCGGUU        | ge     | 1 |
| snorf_ | Bra040 |     | 20 |   |    |      |      | AAUGGGAAUCUCUCUG  | UGCAUUAGAGCGGUU  | Transl |   |
| 2_15   | 463    | 2.5 | .7 | 1 | 21 | 579  | 599  | AUGCA             | UCCA UU          | ation  | 1 |
| snorf_ | Bra012 |     | 23 |   |    |      |      | AAUGGGAAUCUCUCUG  | GGCGUAUCAGAGAGA  | Cleava |   |
| 2_15   | 699    | 3   | .1 | 1 | 23 | 1021 | 1043 | AUGCACU           | UUCUUGUC         | ge     | 1 |
| snorf_ | Bra033 |     | 20 |   |    |      |      | AAUGGGAAUCUCUCUG  | AAUGCCUCACAGAGAU | Cleava |   |
| 2_15   | 876    | 3   | .7 | 1 | 23 | 447  | 469  | AUGCACU           | UUUCAUU          | ge     | 1 |
| snorf_ | Bra035 |     | 21 |   |    |      |      | AAUGGGAAUCUCUCUG  | ACAUGAGAGAGGUUU  | Cleava |   |
| 2_15   | 134    | 3   | .1 | 1 | 20 | 2054 | 2073 | AUGC              | CCA UU           | ge     | 1 |
| snorf_ | Bra012 |     | 22 |   |    |      |      | AUGGGAAUCUCUCUGA  | GGCGUAUCAGAGAGA  | Cleava |   |
| 2_16   | 699    | 3   | .5 | 1 | 22 | 1021 | 1042 | UGCACU            | UUCUUGU          | ge     | 1 |
| snorf_ | Bra030 |     | 12 |   |    |      |      | AUGGGAAUCUCUCUGA  | AAUACAUCAGAGAGAU | Cleava |   |
| 2_16   | 518    | 2.5 | .2 | 1 | 22 | 155  | 176  | UGCACU            | UCUCAG           | ge     | 1 |
| snorf_ | Bra040 |     | 20 |   |    |      |      | AUGGGAAUCUCUCUGA  | UGCAUUAGAGCGGUU  | Transl |   |
| 2_16   | 463    | 2.5 | .4 | 1 | 20 | 579  | 598  | UGCA              | UCCA U           | ation  | 1 |
| snorf_ | Bra040 |     | 18 |   |    |      |      | AUGGGAAUCUCUCUGA  | UGCAUUAGAGCGGUU  | Transl |   |
| 2_16   | 497    | 2.5 | .1 | 1 | 20 | 657  | 676  | UGCA              | UCCA U           | ation  | 1 |
| snorf_ | Bra002 | 3   | 16 | 1 | 21 | 782  | 802  | AUGGGAAUCUCUCUGA  | GUGCAAUAGGAAGAU  | Transl | 1 |

|        |        |     |    |   |    |      |      |                  |                  |        |   |
|--------|--------|-----|----|---|----|------|------|------------------|------------------|--------|---|
| 2_16   | 806    |     | .3 |   |    |      |      | UGCAC            | UCCCAU           | ation  |   |
| snorf_ | Bra033 |     | 20 |   |    |      |      | AUGGGAAUCUCUCUGA | AAUGCCUCACAGAGAU | Cleava |   |
| 2_16   | 876    | 3   | .9 | 1 | 22 | 447  | 468  | UGCACU           | UUUCAU           | ge     | 1 |
| snorf_ | Bra013 |     | 19 |   |    |      |      | AUGGGAAUCUCUCUGA | UUCAUCGGAAGGUU   | Transl |   |
| 2_16   | 550    | 3   | .9 | 1 | 20 | 463  | 482  | UGCA             | CCCAU            | ation  | 1 |
| snorf_ | Bra020 |     | 23 |   |    |      |      | AUGGGAAUCUCUCUGA | UUCAUCGGAAGGUU   | Transl |   |
| 2_16   | 911    | 3   | .5 | 1 | 20 | 475  | 494  | UGCA             | CCCAU            | ation  | 1 |
| snorf_ | Bra039 |     | 15 |   |    |      |      | CUAAAUGGGAAUCUCU | UCAGGGAGAUUCUCA  | Cleava |   |
| 2_17   | 448    | 1   | .3 | 1 | 20 | 820  | 839  | CUGA             | UUUAG            | ge     | 1 |
| snorf_ | Bra034 |     | 14 |   |    |      |      | CUAAAUGGGAAUCUCU | CCAGAGAGAUUCUUAU | Cleava |   |
| 2_17   | 045    | 2   | .4 | 1 | 20 | 135  | 154  | CUGA             | UUAG             | ge     | 1 |
| snorf_ | Bra029 |     | 14 |   |    |      |      | CUAAAUGGGAAUCUCU | CCAGAGAAAUUCUUAU | Cleava |   |
| 2_17   | 738    | 3   | .8 | 1 | 20 | 135  | 154  | CUGA             | UUAG             | ge     | 1 |
| snorf_ | Bra012 |     | 22 |   |    |      |      | AUGGGAAUCUCUCUGA | GGCGUAUCAGAGAGA  | Cleava |   |
| 2_18   | 699    | 3   | .5 | 1 | 22 | 1021 | 1042 | UGCACU           | UUCUUGU          | ge     | 1 |
| snorf_ | Bra030 |     | 12 |   |    |      |      | AUGGGAAUCUCUCUGA | AAUACAUCAGAGAGAU | Cleava |   |
| 2_18   | 518    | 2.5 | .2 | 1 | 22 | 155  | 176  | UGCACU           | UCUCAG           | ge     | 1 |
| snorf_ | Bra040 |     | 20 |   |    |      |      | AUGGGAAUCUCUCUGA | UGCAUUAGAGCGGUU  | Transl |   |
| 2_18   | 463    | 2.5 | .4 | 1 | 20 | 579  | 598  | UGCA             | UCCAU            | ation  | 1 |
| snorf_ | Bra040 |     | 18 |   |    |      |      | AUGGGAAUCUCUCUGA | UGCAUUAGAGCGGUU  | Transl |   |
| 2_18   | 497    | 2.5 | .1 | 1 | 20 | 657  | 676  | UGCA             | UCCAU            | ation  | 1 |
| snorf_ | Bra002 |     | 16 |   |    |      |      | AUGGGAAUCUCUCUGA | GUGCAAUAGGAAGAU  | Transl |   |
| 2_18   | 806    | 3   | .3 | 1 | 21 | 782  | 802  | UGCAC            | UCCCAU           | ation  | 1 |
| snorf_ | Bra033 |     | 20 |   |    |      |      | AUGGGAAUCUCUCUGA | AAUGCCUCACAGAGAU | Cleava |   |
| 2_18   | 876    | 3   | .9 | 1 | 22 | 447  | 468  | UGCACU           | UUUCAU           | ge     | 1 |
| snorf_ | Bra013 |     | 19 |   |    |      |      | AUGGGAAUCUCUCUGA | UUCAUCGGAAGGUU   | Transl |   |
| 2_18   | 550    | 3   | .9 | 1 | 20 | 463  | 482  | UGCA             | CCCAU            | ation  | 1 |
| snorf_ | Bra020 |     | 23 |   |    |      |      | AUGGGAAUCUCUCUGA | UUCAUCGGAAGGUU   | Transl |   |
| 2_18   | 911    | 3   | .5 | 1 | 20 | 475  | 494  | UGCA             | CCCAU            | ation  | 1 |
| snorf_ | Bra039 |     | 15 |   |    |      |      | CUAAAUGGGAAUCUCU | UCAGGGAGAUUCUCA  | Cleava |   |
| 2_19   | 448    | 1   | .3 | 1 | 20 | 820  | 839  | CUGA             | UUUAG            | ge     | 1 |
| snorf_ | Bra034 |     | 14 |   |    |      |      | CUAAAUGGGAAUCUCU | CCAGAGAGAUUCUUAU | Cleava |   |
| 2_19   | 045    | 2   | .4 | 1 | 20 | 135  | 154  | CUGA             | UUAG             | ge     | 1 |
| snorf_ | Bra029 | 3   | 14 | 1 | 20 | 135  | 154  | CUAAAUGGGAAUCUCU | CCAGAGAAAUUCUUAU | Cleava | 1 |

|        |        |     |    |   |    |      |      |                   |                  |        |   |
|--------|--------|-----|----|---|----|------|------|-------------------|------------------|--------|---|
| 2_19   | 738    |     | .8 |   |    |      |      | CUGA              | UUAG             | ge     |   |
| snorf_ | Bra029 |     | 22 |   |    |      |      | CCCAUAAUUAUAUCUGA | AGGCCCAGAUCUAAUA | Transl |   |
| 2_23   | 293    | 3   | .4 | 1 | 20 | 655  | 674  | GCCU              | UGGC             | ation  | 1 |
| snorf_ | Bra009 |     | 20 |   |    |      |      | AAUUGGAGACCUGAAC  | AGCUGUUAAGUUCAG  | Cleava |   |
| 2_28   | 567    | 2.5 | .1 | 1 | 25 | 906  | 930  | UGAAGAGUU         | GUGUCCGAUU       | ge     | 1 |
| snorf_ | Bra017 |     | 14 |   |    |      |      | AAUUGGAGACCUGAAC  | AACAGUUCAGGUCUCC | Cleava |   |
| 2_28   | 838    | 3   | .7 | 1 | 20 | 546  | 565  | UGAA              | AAUG             | ge     | 1 |
| snorf_ | Bra028 |     | 14 |   |    |      |      | AUGGAGACCUGAACUG  | AAAGCUUUAAUUCGG  | Cleava |   |
| 2_30   | 460    | 3   | .5 | 1 | 23 | 4537 | 4559 | AAGAGUU           | GUCUCCAU         | ge     | 1 |
| snorf_ | Bra016 |     | 20 |   |    |      |      | AUGGAGACCUGAACUG  | GGUUCUUCAGUU-    | Transl |   |
| 2_30   | 932    | 3   | .3 | 1 | 23 | 9    | 30   | AAGAGUU           | AGGUCUCCAG       | ation  | 1 |
| snorf_ | Bra022 |     | 17 |   |    |      |      | AUGGAGACCUGAACUG  | UUCUUCACUUCAAGUC | Transl |   |
| 2_30   | 483    | 3   | .9 | 1 | 21 | 61   | 81   | AAGAG             | UCCAG            | ation  | 1 |
| snorf_ | Bra015 |     | 22 |   |    |      |      | AUGGAGACCUGAACUG  | AGUUCUUGAGU-     | Cleava |   |
| 2_30   | 521    | 3   | .9 | 1 | 23 | 344  | 365  | AAGAGUU           | CAGGUCUCCAU      | ge     | 1 |
| snorf_ | Bra030 |     | 18 |   |    |      |      | AUGGAGACCUGAACUG  | UCUUCAAUUCAGAUU  | Cleava |   |
| 2_30   | 840    | 3   | .3 | 1 | 20 | 994  | 1013 | AAGA              | UCUUAU           | ge     | 1 |
| snorf_ | Bra006 |     | 22 |   |    |      |      | UUGGAGACCUGAACUG  | ACUCUUCAGUUCUGG  | Transl |   |
| 2_32   | 754    | 2.5 | .1 | 1 | 22 | 177  | 198  | AAGAGU            | ACUCCAA          | ation  | 2 |
| snorf_ | Bra006 |     | 23 |   |    |      |      | UUGGAGACCUGAACUG  | ACUCUUCAGUUCUGG  | Transl |   |
| 2_32   | 754    | 2.5 | .5 | 1 | 22 | 924  | 945  | AAGAGU            | ACUCCAA          | ation  | 2 |
| snorf_ | Bra020 |     | 21 |   |    |      |      | UUGGAGACCUGAACUG  | AGAUCUCCGGUUCAGG | Cleava |   |
| 2_32   | 436    | 2.5 | .4 | 1 | 23 | 158  | 180  | AAGAGUU           | UUUUCAA          | ge     | 1 |
| snorf_ | Bra038 |     | 19 |   |    |      |      | UUGGAGACCUGAACUG  | GGUUCUUCAGUUUGG  | Cleava |   |
| 2_32   | 148    | 3   | .3 | 1 | 23 | 902  | 924  | AAGAGUU           | CUCUCCGG         | ge     | 1 |
| snorf_ | Bra002 |     | 14 |   |    |      |      | UUGGAGACCUGAACUG  | AGAUCUCUGGUUCAG  | Cleava |   |
| 2_32   | 723    | 3   | .0 | 1 | 23 | 167  | 189  | AAGAGUU           | GUUUUCAA         | ge     | 1 |
| snorf_ | Bra032 |     | 18 |   |    |      |      | UUGGAGACCUGAACUG  | AAGUCUUCAGAU CGU | Transl |   |
| 2_32   | 144    | 3   | .8 | 1 | 23 | 934  | 956  | AAGAGUU           | GUUUCCAA         | ation  | 1 |
| snorf_ | Bra038 |     | 23 |   |    |      |      | UUGGAGACCUGAACUG  | GGUUCUUUGGACCAG  | Cleava |   |
| 2_32   | 611    | 3   | .3 | 1 | 23 | 1122 | 1144 | AAGAGUU           | GUCUCCAA         | ge     | 1 |
| snorf_ | Bra016 |     | 20 |   |    |      |      | UUGGAGACCUGAACUG  | GGUUCUUCAGUU-    | Transl |   |
| 2_32   | 932    | 2.5 | .3 | 1 | 23 | 9    | 30   | AAGAGUU           | AGGUCUCCAG       | ation  | 1 |
| snorf_ | Bra022 | 2.5 | 17 | 1 | 21 | 61   | 81   | UUGGAGACCUGAACUG  | UUCUUCACUUCAAGUC | Transl | 1 |

|        |        |     |    |   |    |      |      |                  |                   |        |   |
|--------|--------|-----|----|---|----|------|------|------------------|-------------------|--------|---|
| 2_32   | 483    |     | .9 |   |    |      |      | AAGAG            | UCCAG             | ation  |   |
| snorf_ | Bra026 |     | 10 |   |    |      |      | UUGGAGACCUGAACUG | CUUUUACUUCACGUC   | Transl |   |
| 2_32   | 846    | 3   | .6 | 1 | 21 | 49   | 69   | AAGAG            | UUCAA             | ation  | 1 |
| snorf_ | Bra000 |     | 20 |   |    |      |      | UUGGAGACCUGAACUG | GUUCUUCAGUUCAAU   | Transl |   |
| 2_32   | 658    | 3   | .5 | 1 | 22 | 1025 | 1046 | AAGAGU           | UCUCUAG           | ation  | 1 |
| snorf_ | Bra025 |     | 16 |   |    |      |      | UUGGAGACCUGAACUG | UUCUUCAGUUCAUCU   | Transl |   |
| 2_32   | 935    | 3   | .6 | 1 | 21 | 239  | 259  | AAGAG            | UUCUAA            | ation  | 1 |
| snorf_ | Bra002 |     | 14 |   |    |      |      | UUGGAGACCUGAACUG | AAUCUUCACUUGAAGU  | Transl |   |
| 2_32   | 246    | 3   | .7 | 1 | 22 | 1049 | 1070 | AAGAGU           | CUCCAA            | ation  | 1 |
| snorf_ | Bra006 |     | 22 |   |    |      |      | AUUGGAGACCUGAACU | ACUCUUCAGUUCUGG   | Transl |   |
| 2_34   | 754    | 3   | .3 | 1 | 23 | 177  | 199  | GAAGAGU          | ACUCCAAG          | ation  | 2 |
| snorf_ | Bra006 |     | 23 |   |    |      |      | AUUGGAGACCUGAACU | ACUCUUCAGUUCUGG   | Transl |   |
| 2_34   | 754    | 3   | .4 | 1 | 23 | 924  | 946  | GAAGAGU          | ACUCCAAG          | ation  | 2 |
| snorf_ | Bra010 |     | 18 |   |    |      |      | AUUGGAGACCUGAACU | AAUCCUCCGGUUCAGG  | Cleava |   |
| 2_34   | 291    | 2.5 | .8 | 1 | 24 | 173  | 196  | GAAGAGUU         | UUUUCAAU          | ge     | 1 |
| snorf_ | Bra020 |     | 21 |   |    |      |      | AUUGGAGACCUGAACU | AGAUCCUCCGGUUCAGG | Cleava |   |
| 2_34   | 436    | 2.5 | .2 | 1 | 24 | 158  | 181  | GAAGAGUU         | UUUUCAAU          | ge     | 1 |
| snorf_ | Bra038 |     | 20 |   |    |      |      | AUUGGAGACCUGAACU | GGUUCUUCAGUUUGG   | Transl |   |
| 2_34   | 148    | 3   | .6 | 1 | 24 | 902  | 925  | GAAGAGUU         | CUCUCCGGU         | ation  | 1 |
| snorf_ | Bra002 |     | 14 |   |    |      |      | AUUGGAGACCUGAACU | AGAUUCUCUGGUUCAG  | Cleava |   |
| 2_34   | 723    | 3   | .2 | 1 | 24 | 167  | 190  | GAAGAGUU         | GUUUUCAAU         | ge     | 1 |
| snorf_ | Bra017 |     | 14 |   |    |      |      | AUUGGAGACCUGAACU | AAACAGUUCAGGUCUC  | Cleava |   |
| 2_34   | 838    | 3   | .8 | 1 | 20 | 545  | 564  | GAAG             | CAAU              | ge     | 1 |
| snorf_ | Bra023 |     | 20 |   |    |      |      | AUUGGAGACCUGAACU | CCUCGGUUCAAGUUUC  | Transl |   |
| 2_34   | 921    | 3   | .1 | 1 | 20 | 837  | 856  | GAAG             | CAAU              | ation  | 1 |
| snorf_ | Bra015 |     | 19 |   |    |      |      | AUUGGAGACCUGAACU | CUUCAGUUCGCGGUU   | Transl |   |
| 2_34   | 683    | 3   | .1 | 1 | 20 | 244  | 263  | GAAG             | CCAAU             | ation  | 1 |
| snorf_ | Bra028 |     | 14 |   |    |      |      | UAAUGGAGACCUGAAC | AAAGCUUUAAUUCGG   | Cleava |   |
| 2_35   | 460    | 2.5 | .6 | 1 | 25 | 4537 | 4561 | UGAAGAGUU        | GUCUCCAUUG        | ge     | 1 |
| snorf_ | Bra029 |     | 14 |   |    |      |      | AGAAACAAAUCUGAGG | UGUCUCUUAGAUUUUG  | Cleava |   |
| 2_37   | 006    | 2.5 | .0 | 1 | 20 | 1304 | 1323 | CAUA             | UUUCU             | ge     | 1 |
| snorf_ | Bra030 |     | 21 |   |    |      |      | AGAAACAAAUCUGAGG | UAUACGUCGGGUUUUG  | Cleava |   |
| 2_37   | 358    | 3   | .3 | 1 | 20 | 383  | 402  | CAUA             | UUUCU             | ge     | 1 |
| snorf_ | Bra020 | 3   | 21 | 1 | 20 | 383  | 402  | AGAAACAAAUCUGAGG | UAUACGUCGGGUUUUG  | Cleava | 1 |

|        |        |     |    |   |    |      |      |                  |                  |        |   |
|--------|--------|-----|----|---|----|------|------|------------------|------------------|--------|---|
| 2_37   | 560    |     | .3 |   |    |      |      | CAUA             | UUUCU            | ge     |   |
| snorf_ | Bra034 |     | 18 |   |    |      |      | AGAAACAAAUCUGAGG | UUUGCGUUGGAUUUG  | Cleava |   |
| 2_37   | 174    | 3   | .5 | 1 | 20 | 1171 | 1190 | CAUA             | UUUCU            | ge     | 1 |
| snorf_ | Bra015 |     | 21 |   |    |      |      | AGAAACAA-        | AUGCAUCAGAUUCUUG | Transl |   |
| 2_37   | 990    | 3   | .5 | 1 | 19 | 1151 | 1170 | AUCUGAGGCAU      | UUUCU            | ation  | 1 |
| snorf_ | Bra028 |     | 21 |   |    |      |      | AAAAAGAAACAAAUCU | UGACUUUGAUUUUGUU | Cleava |   |
| 2_38   | 371    | 2.5 | .0 | 1 | 22 | 578  | 599  | GAGGCA           | UCUUUUU          | ge     | 1 |
| snorf_ | Bra040 |     | 9. |   |    |      |      | AAAAAGAAACAAAUCU | UCUCAGUUUUUGUUUC | Cleava |   |
| 2_38   | 587    | 3   | 6  | 1 | 20 | 23   | 42   | GAGG             | UAUUU            | ge     | 1 |
| snorf_ | Bra017 |     | 20 |   |    |      |      | AAGAAACAAAUCUGAG | CUGCUUCAGAGUUGU  | Transl |   |
| 2_40   | 434    | 2.5 | .2 | 1 | 20 | 1571 | 1590 | GCAU             | UUCUU            | ation  | 1 |
| snorf_ | Bra020 |     | 21 |   |    |      |      | AAGAAACAAAUCUGAG | UAUACGUCGGGUUUG  | Cleava |   |
| 2_40   | 560    | 3   | .1 | 1 | 21 | 383  | 403  | GCAUA            | UUUCUU           | ge     | 1 |
| snorf_ | Bra030 |     | 21 |   |    |      |      | AAGAAACAAAUCUGAG | UAUACGUCGGGUUUG  | Cleava |   |
| 2_40   | 358    | 3   | .1 | 1 | 21 | 383  | 403  | GCAUA            | UUUCUU           | ge     | 1 |
| snorf_ | Bra040 |     | 19 |   |    |      |      | AAGAAACAAAUCUGAG | AUGGCGCAGAAUUGU  | Transl |   |
| 2_40   | 779    | 3   | .4 | 1 | 20 | 176  | 195  | GCAU             | UUCUU            | ation  | 1 |
| snorf_ | Bra038 |     | 19 |   |    |      |      | AAGAAACAAAUCUGAG | AUGCCUCAGAAU-    | Transl |   |
| 2_40   | 776    | 3   | .3 | 1 | 20 | 1873 | 1891 | GCAU             | GUUUCUU          | ation  | 1 |
| snorf_ | Bra017 |     | 20 |   |    |      |      | AAAGAAACAAAUCUGA | UGCUUCAGAGUUGUU  | Transl |   |
| 2_42   | 434    | 2.5 | .9 | 1 | 20 | 1572 | 1591 | GGCA             | UCUUG            | ation  | 1 |
| snorf_ | Bra028 |     | 22 |   |    |      |      | AAAGAAACAAAUCUGA | AUUGACUUUGAUUUUG | Cleava |   |
| 2_42   | 371    | 2.5 | .8 | 1 | 22 | 576  | 597  | GGCAUU           | UUUCUUU          | ge     | 1 |
| snorf_ | Bra017 |     | 20 |   |    |      |      | AAGAAACAAAUCUGAG | CUGCUUCAGAGUUGU  | Transl |   |
| 2_45   | 434    | 2.5 | .2 | 1 | 20 | 1571 | 1590 | GCAU             | UUCUU            | ation  | 1 |
| snorf_ | Bra020 |     | 21 |   |    |      |      | AAGAAACAAAUCUGAG | AUACGUCGGGUUUGU  | Cleava |   |
| 2_45   | 560    | 3   | .1 | 1 | 20 | 384  | 403  | GCAU             | UUCUU            | ge     | 1 |
| snorf_ | Bra030 |     | 21 |   |    |      |      | AAGAAACAAAUCUGAG | AUACGUCGGGUUUGU  | Cleava |   |
| 2_45   | 358    | 3   | .1 | 1 | 20 | 384  | 403  | GCAU             | UUCUU            | ge     | 1 |
| snorf_ | Bra040 |     | 19 |   |    |      |      | AAGAAACAAAUCUGAG | GAUGGCGCAGAAUUG  | Transl |   |
| 2_45   | 779    | 3   | .4 | 1 | 21 | 175  | 195  | GCAUU            | UUUCUU           | ation  | 1 |
| snorf_ | Bra038 |     | 19 |   |    |      |      | AAGAAACAAAUCUGAG | GAUGCCUCAGAAU-   | Transl |   |
| 2_45   | 776    | 3   | .3 | 1 | 21 | 1872 | 1891 | GCAUU            | GUUUCUU          | ation  | 1 |
| snorf_ | Bra001 | 2   | 22 | 1 | 20 | 600  | 619  | AGCAUUUAUACUCUGA | AUCUUCAGGGUGUGA  | Cleava | 1 |



|        |        |     |    |   |    |      |      |                   |                  |        |   |
|--------|--------|-----|----|---|----|------|------|-------------------|------------------|--------|---|
| 2_48   | 724    |     | .1 |   |    |      |      | GGAU              | AUGCU            | ge     |   |
| snorf_ | Bra026 |     | 20 |   |    |      |      | AGCAUUUUAUACUCUGA | AUCCCCAAAGUGUAAA | Cleava |   |
| 2_48   | 537    | 2.5 | .1 | 1 | 20 | 306  | 325  | GGAU              | UGCU             | ge     | 1 |
| snorf_ | Bra027 |     | 20 |   |    |      |      | AGCAUUUUAUACUCUGA | AUCCCCAAAGUGUAAA | Cleava |   |
| 2_48   | 085    | 2.5 | .1 | 1 | 20 | 795  | 814  | GGAU              | UGCU             | ge     | 1 |
| snorf_ | Bra019 |     | 19 |   |    |      |      | AGCAUUUUAUACUCUGA | AACCUGAGAGUAUGAA | Cleava |   |
| 2_48   | 598    | 2.5 | .4 | 1 | 20 | 536  | 555  | GGAU              | UGCU             | ge     | 1 |
| snorf_ | Bra010 |     | 23 |   |    |      |      | AGCAUUUUAUACUCUGA | AUUCUCGGCGAAUAAA | Transl |   |
| 2_48   | 998    | 3   | .3 | 1 | 20 | 1059 | 1078 | GGAU              | UGCU             | ation  | 1 |
| snorf_ | Bra021 |     | 22 |   |    |      |      | AGCAUUUUAUACUCUGA | AGCUUCAGAGGAUGA  | Transl |   |
| 2_48   | 774    | 3   | .1 | 1 | 20 | 527  | 546  | GGAU              | AUGCU            | ation  | 1 |
| snorf_ | Bra015 |     | 17 |   |    |      |      | AGCAUUUUAUACUCUGA | AUUGUCAGAGUCUGA  | Transl |   |
| 2_48   | 729    | 3   | .3 | 1 | 20 | 2408 | 2427 | GGAU              | AUGCU            | ation  | 1 |
| snorf_ | Bra028 |     | 16 |   |    |      |      | AGCAUUUUAUACUCUGA | AUCUCCAGAGAAUAAA | Transl |   |
| 2_48   | 876    | 3   | .0 | 1 | 20 | 3635 | 3654 | GGAU              | UGUU             | ation  | 1 |
| snorf_ | Bra004 |     | 22 |   |    |      |      | AGCAUUUUUACUCUGA  | UUCAUCAGAGUGAAG  | Cleava |   |
| 2_49   | 232    | 3   | .6 | 1 | 20 | 587  | 606  | GGAU              | AUGCU            | ge     | 1 |
| snorf_ | Bra001 |     | 22 |   |    |      |      | AGCAUUUUUACUCUGA  | AUCUUCAGGGUGUGA  | Cleava |   |
| 2_49   | 724    | 3   | .1 | 1 | 20 | 600  | 619  | GGAU              | AUGCU            | ge     | 1 |
| snorf_ | Bra021 |     | 12 |   |    |      |      | AGCAUUUUUACUCUGA  | AUCUUGAGAGUAAGA  | Cleava |   |
| 2_49   | 294    | 3   | .3 | 1 | 20 | 782  | 801  | GGAU              | GUGUU            | ge     | 1 |
| snorf_ | Bra016 |     | 17 |   |    |      |      | AGCAUUUUUACUCUGA  | AUCUUGAGAGUAAGA  | Cleava |   |
| 2_49   | 570    | 3   | .6 | 1 | 20 | 785  | 804  | GGAU              | GUGUU            | ge     | 1 |
| snorf_ | Bra040 |     | 11 |   |    |      |      | AGCAUUUUUACUCUGA  | AUUCUCAUAGUAAUAA | Cleava |   |
| 2_49   | 585    | 3   | .3 | 1 | 20 | 1112 | 1131 | GGAU              | UGCU             | ge     | 1 |
| snorf_ | Bra025 |     | 9. |   |    |      |      | AGCAUUUUUACUCUGA  | AUUCUCACAGUAACAA | Cleava |   |
| 2_49   | 408    | 3   | 2  | 1 | 20 | 1073 | 1092 | GGAU              | UGCU             | ge     | 1 |
| snorf_ | Bra027 |     | 17 |   |    |      |      | AGCAUUUUUACUCUGA  | AUCUUGAGAGGAAAA  | Transl |   |
| 2_49   | 290    | 2.5 | .2 | 1 | 20 | 1226 | 1245 | GGAU              | AUGCU            | ation  | 1 |
| snorf_ | Bra006 |     | 13 |   |    |      |      | AGCAUUUUUACUCUGA  | AUCCUCAAAGGGAAAA | Transl |   |
| 2_49   | 809    | 3   | .2 | 1 | 20 | 740  | 759  | GGAU              | UGUU             | ation  | 1 |
| snorf_ | Bra002 |     | 16 |   |    |      |      | AUGGGAAUCUCUCUGA  | UGUGCAAUAGGAAGA  | Transl |   |
| 2_51   | 806    | 3   | .3 | 1 | 22 | 781  | 802  | UGCACA            | UUCCCAU          | ation  | 1 |
| snorf_ | Bra012 | 3   | 22 | 1 | 21 | 1022 | 1042 | AUGGGAAUCUCUCUGA  | GCGUAUCAGAGAGAU  | Cleava | 1 |

|        |        |     |    |   |    |      |      |                  |                  |        |   |
|--------|--------|-----|----|---|----|------|------|------------------|------------------|--------|---|
| 2_51   | 699    |     | .5 |   |    |      |      | UGCAC            | UCUUGU           | ge     |   |
| snorf_ | Bra040 |     | 20 |   |    |      |      | AUGGGAAUCUCUCUGA | UUUGCAUUAGAGCGG  | Transl |   |
| 2_51   | 463    | 2.5 | .4 | 1 | 22 | 577  | 598  | UGCACA           | UUUCCAU          | ation  | 1 |
| snorf_ | Bra030 |     | 12 |   |    |      |      | AUGGGAAUCUCUCUGA | UACAUCAGAGAGAUUC | Cleava |   |
| 2_51   | 518    | 2.5 | .2 | 1 | 20 | 157  | 176  | UGCA             | UCAG             | ge     | 1 |
| snorf_ | Bra040 |     | 18 |   |    |      |      | AUGGGAAUCUCUCUGA | UUUGCAUUAGAGCGG  | Transl |   |
| 2_51   | 497    | 2.5 | .1 | 1 | 22 | 655  | 676  | UGCACA           | UUUCCAU          | ation  | 1 |
| snorf_ | Bra013 |     | 19 |   |    |      |      | AUGGGAAUCUCUCUGA | UUUUCAUCGGAAAGG  | Transl |   |
| 2_51   | 550    | 3   | .9 | 1 | 22 | 461  | 482  | UGCACA           | UUCCTAU          | ation  | 1 |
| snorf_ | Bra020 |     | 23 |   |    |      |      | AUGGGAAUCUCUCUGA | UUUUCAUCGGAAAGG  | Transl |   |
| 2_51   | 911    | 3   | .5 | 1 | 22 | 473  | 494  | UGCACA           | UUCCTAU          | ation  | 1 |
| snorf_ | Bra033 |     | 20 |   |    |      |      | AUGGGAAUCUCUCUGA | UGCCUCACAGAGAUUU | Cleava |   |
| 2_51   | 876    | 3   | .9 | 1 | 20 | 449  | 468  | UGCA             | UCAU             | ge     | 1 |
| snorf_ | Bra030 |     | 12 |   |    |      |      | UGGGAAUCUCUCUGA  | AUACAUCAGAGAGAUU | Cleava |   |
| 2_52   | 518    | 2.5 | .6 | 1 | 20 | 156  | 175  | UGCAC            | CUCA             | ge     | 1 |
| snorf_ | Bra002 |     | 18 |   |    |      |      | UGGGAAUCUCUCUGA  | UGUGCAAUAGGAAGA  | Transl |   |
| 2_52   | 806    | 3   | .1 | 1 | 21 | 781  | 801  | UGCACA           | UUCCTA           | ation  | 1 |
| snorf_ | Bra012 |     | 22 |   |    |      |      | UGGGAAUCUCUCUGA  | GCGUAUCAGAGAGAU  | Cleava |   |
| 2_52   | 699    | 3   | .5 | 1 | 20 | 1022 | 1041 | UGCAC            | UCUUG            | ge     | 1 |
| snorf_ | Bra032 |     | 16 |   |    |      |      | UGGGAAUCUCUCUGA  | GUACAUAAGAGAGAU  | Cleava |   |
| 2_52   | 561    | 3   | .2 | 1 | 20 | 156  | 175  | UGCAC            | UCUUA            | ge     | 1 |
| snorf_ | Bra037 |     | 16 |   |    |      |      | UGGGAAUC-        | UGUAUCAGAGAAGAU  | Transl |   |
| 2_52   | 660    | 3   | .3 | 1 | 19 | 42   | 61   | UCUCUGAUGCA      | UCUCA            | ation  | 1 |
| snorf_ | Bra007 |     | 19 |   |    |      |      | UGGGAAUCUCUCUGA  | GUGCAUCAG-       | Transl |   |
| 2_52   | 594    | 3   | .3 | 1 | 20 | 2224 | 2242 | UGCAC            | GAGAUUCUUA       | ation  | 1 |
| snorf_ | Bra039 |     | 15 |   |    |      |      | CUAAAUGGGAAUCUCU | UCAGGGAGAUUCUCA  | Cleava |   |
| 2_53   | 448    | 1   | .3 | 1 | 20 | 820  | 839  | CUGA             | UUUAG            | ge     | 1 |
| snorf_ | Bra034 |     | 14 |   |    |      |      | CUAAAUGGGAAUCUCU | CCAGAGAGAUUCUUAU | Cleava |   |
| 2_53   | 045    | 2   | .4 | 1 | 20 | 135  | 154  | CUGA             | UUAG             | ge     | 1 |
| snorf_ | Bra029 |     | 14 |   |    |      |      | CUAAAUGGGAAUCUCU | CCAGAGAAAUUCUUAU | Cleava |   |
| 2_53   | 738    | 3   | .8 | 1 | 20 | 135  | 154  | CUGA             | UUAG             | ge     | 1 |

snoRF Unpollinated ovules

| ncRNA<br>_Acc. | Target<br>_Acc. | Expect<br>ation | U<br>PE | ncRNA_<br>start | ncRNA_<br>_end | Target_<br>start | Target_<br>_end | ncRNA_aligned_fragme<br>nt   | Target_aligned_fragm<br>ent  | Inhibiti<br>on  | Multip<br>licity |
|----------------|-----------------|-----------------|---------|-----------------|----------------|------------------|-----------------|------------------------------|------------------------------|-----------------|------------------|
| snorf_4<br>_2  | Bra022<br>523   | 3               | .4      | 1               | 20             | 288              | 307             | GAGCUGUGAUGAUAU<br>UAGGC     | CCCUAAUGUUGUCAC<br>AGUUC     | Cleava<br>ge    | 1                |
| snorf_4<br>_2  | Bra035<br>613   | 2.5             | .7      | 1               | 20             | 153              | 172             | GAGCUGUGAUGAUAU<br>UAGGC     | GCCUAGUCUCGUCAC<br>GGCUC     | Cleava<br>ge    | 1                |
| snorf_4<br>_2  | Bra000<br>855   | 3               | .5      | 1               | 20             | 1892             | 1911            | GAGCUGUGAUGAUAU<br>UAGGC     | GUUUAAUAAUAUCAC<br>AGCUU     | Cleava<br>ge    | 1                |
| snorf_4<br>_2  | Bra032<br>852   | 3               | .5      | 1               | 20             | 857              | 876             | GAGCUGUGAUGAUAU<br>UAGGC     | GUCCGAUAUCAUUAC<br>AGCUU     | Cleava<br>ge    | 1                |
| snorf_4<br>_2  | Bra026<br>759   | 3               | .1      | 1               | 20             | 203              | 222             | GAGCUGUGAUGAUAU<br>UAGGC     | GUCUAAUCACAUCACA<br>GUUC     | Cleava<br>ge    | 1                |
| snorf_4<br>_2  | Bra004<br>297   | 3               | .0      | 1               | 20             | 621              | 640             | GAGCUGUGAUGAUAU<br>UAGGC     | GCCUGAUCUCAUGAC<br>AGUUC     | Cleava<br>ge    | 1                |
| snorf_4<br>_2  | Bra040<br>986   | 3               | .9      | 1               | 19             | 3393             | 3412            | GAGCUGUGA-<br>UGAUUUUAGG     | UCUGAUUAUCAAUCAC<br>AGCUC    | Transl<br>ation | 1                |
| snorf_4<br>_3  | Bra037<br>392   | 3               | .0      | 1               | 20             | 319              | 338             | GAGCUGUGAUGAUAU<br>UUGGC     | UCCAAAUCUCAUCAUA<br>GCUU     | Cleava<br>ge    | 1                |
| snorf_4<br>_3  | Bra039<br>067   | 3               | .5      | 1               | 20             | 409              | 428             | GAGCUGUGAUGAUAU<br>UUGGC     | GUUGGAUCUCAUCAC<br>AGCUC     | Cleava<br>ge    | 1                |
| snorf_4<br>_4  | Bra005<br>417   | 3               | .6      | 1               | 24             | 63               | 86              | GGCCGAUGAUUUAAA<br>UAAUUUUGA | UUGGAAUUACAUAAA<br>UCAUCGGUU | Cleava<br>ge    | 1                |
| snorf_4<br>_5  | Bra039<br>448   | 1               | .3      | 1               | 20             | 820              | 839             | CUAAAUGGGAAUCUCU<br>CUGA     | UCAGGGAGAUUCUCA<br>UUUAG     | Cleava<br>ge    | 1                |
| snorf_4<br>_5  | Bra034<br>045   | 2               | .4      | 1               | 20             | 135              | 154             | CUAAAUGGGAAUCUCU<br>CUGA     | CCAGAGAGAUUCUUA<br>UUUAG     | Cleava<br>ge    | 1                |
| snorf_4<br>_5  | Bra029<br>738   | 3               | .8      | 1               | 20             | 135              | 154             | CUAAAUGGGAAUCUCU<br>CUGA     | CCAGAGAAAUUCUUA<br>UUUAG     | Cleava<br>ge    | 1                |
| snorf_4<br>_7  | Bra039<br>448   | 1               | .3      | 1               | 20             | 820              | 839             | CUAAAUGGGAAUCUCU<br>CUGA     | UCAGGGAGAUUCUCA<br>UUUAG     | Cleava<br>ge    | 1                |
| snorf_4<br>_7  | Bra034<br>045   | 2               | .4      | 1               | 20             | 135              | 154             | CUAAAUGGGAAUCUCU<br>CUGA     | CCAGAGAGAUUCUUA<br>UUUAG     | Cleava<br>ge    | 1                |
| snorf_4<br>_7  | Bra029<br>738   | 3               | .8      | 1               | 20             | 135              | 154             | CUAAAUGGGAAUCUCU<br>CUGA     | CCAGAGAAAUUCUUA<br>UUUAG     | Cleava<br>ge    | 1                |

|         |        |     |    |   |    |      |      |                  |                  |          |   |
|---------|--------|-----|----|---|----|------|------|------------------|------------------|----------|---|
| snorf_4 | Bra028 | 14  |    |   |    |      |      | AUGGAGACCUGAACUG | AAAGCUUUAAUUCGG  | Cleavage |   |
| _8      | 460    | 3   | .5 | 1 | 23 | 4537 | 4559 | AAGAGUU          | GUCUCCAU         | ge       | 1 |
| snorf_4 | Bra016 | 20  |    |   |    |      |      | AUGGAGACCUGAACUG | GGUUCUUCAGUU-    | Transl   |   |
| _8      | 932    | 3   | .3 | 1 | 23 | 9    | 30   | AAGAGUU          | AGGUCUCCAG       | ation    | 1 |
| snorf_4 | Bra022 | 17  |    |   |    |      |      | AUGGAGACCUGAACUG | UUCUUCACUUCAAGU  | Transl   |   |
| _8      | 483    | 3   | .9 | 1 | 21 | 61   | 81   | AAGAG            | CUCCAG           | ation    | 1 |
| snorf_4 | Bra015 | 22  |    |   |    |      |      | AUGGAGACCUGAACUG | AGUUCUUGAGU-     | Cleavage |   |
| _8      | 521    | 3   | .9 | 1 | 23 | 344  | 365  | AAGAGUU          | CAGGUCUCCAU      | ge       | 1 |
| snorf_4 | Bra030 | 18  |    |   |    |      |      | AUGGAGACCUGAACUG | UCUUCAAUUCAGAUU  | Cleavage |   |
| _8      | 840    | 3   | .3 | 1 | 20 | 994  | 1013 | AAGA             | UCUAU            | ge       | 1 |
| snorf_4 | Bra001 | 15  |    |   |    |      |      | UAUGGAGACCUGAACU | UUCAUUCAGUUUAGA  | Transl   |   |
| _10     | 667    | 3   | .3 | 1 | 23 | 189  | 211  | GAGUGGA          | UUUCCAUG         | ation    | 1 |
| snorf_4 | Bra003 | 17  |    |   |    |      |      | UAUGGAGACCUGAACU | CUCUCACUCAGUGCAG | Cleavage |   |
| _10     | 395    | 3   | .1 | 1 | 25 | 942  | 966  | GAGUGGAGG        | GUCAUCAUA        | ge       | 1 |
| snorf_4 | Bra014 | 14  |    |   |    |      |      | UAUGGAGACCUGAACU | CUCUCACUCAGUACAG | Cleavage |   |
| _10     | 523    | 3   | .6 | 1 | 25 | 942  | 966  | GAGUGGAGG        | GUCAUCAUA        | ge       | 1 |
| snorf_4 | Bra007 | 10  |    |   |    |      |      | UAUGGAGACCUGAACU | CUCUCACUCAGUACAG | Cleavage |   |
| _10     | 493    | 3   | .1 | 1 | 25 | 942  | 966  | GAGUGGAGG        | GUCAUCAUA        | ge       | 1 |
| snorf_4 | Bra024 | 23  |    |   |    |      |      | UAUGGAGACCUGAACU | ACUCAGUUCGAGUCU  | Transl   |   |
| _10     | 602    | 3   | .3 | 1 | 20 | 593  | 612  | GAGU             | CCAAA            | ation    | 1 |
| snorf_4 | Bra016 | 17  |    |   |    |      |      | UAUGGAGACCUGAACU | ACUCAGUUCGAGUCU  | Transl   |   |
| _10     | 345    | 3   | .3 | 1 | 20 | 671  | 690  | GAGU             | CCAAA            | ation    | 1 |
| snorf_4 | Bra037 | 23  |    |   |    |      |      | AAUCAAGCCAAUGUUC | UGGCUCAGAAUUAUUG | Cleavage |   |
| _11     | 378    | 2.5 | .6 | 1 | 23 | 1412 | 1434 | UGAUCCA          | GCUUGAUG         | ge       | 1 |
| snorf_4 | Bra028 | 15  |    |   |    |      |      | AAUCAAGCCAAUGUUC | AUAGAUCAGAACAUU  | Transl   |   |
| _11     | 461    | 2.5 | .9 | 1 | 24 | 379  | 402  | UGAUCCA          | AGUUUGAUC        | ation    | 1 |
| snorf_4 | Bra000 | 14  |    |   |    |      |      | AAUCAAGCCAAUGUUC | UGGCUCGGAUUAUUG  | Cleavage |   |
| _11     | 949    | 3   | .8 | 1 | 23 | 1454 | 1476 | UGAUCCA          | GCUUGAUG         | ge       | 1 |
| snorf_4 | Bra032 | 17  |    |   |    |      |      | ACUGUUUUACUCGGU  | UCUCUCCACCGCGUC  | Transl   |   |
| _13     | 960    | 3   | .8 | 1 | 23 | 521  | 543  | GGCAGAAA         | AAACAGU          | ation    | 1 |
| snorf_4 | Bra027 | 19  |    |   |    |      |      | ACUGUUUUACUCGGU  | CUGCCACUGAGGUAA  | Transl   |   |
| _13     | 641    | 2.5 | .4 | 1 | 20 | 2087 | 2106 | GGCAG            | ACAGU            | ation    | 1 |
| snorf_4 | Bra025 | 18  |    |   |    |      |      | ACUGUUUUACUCGGU  | CUGCAGCCAAGUAGA  | Cleavage |   |
| _13     | 882    | 3   | .7 | 1 | 20 | 1332 | 1351 | GGCAG            | ACAGU            | ge       | 1 |

|         |        |     |    |   |    |      |      |                 |                  |             |   |
|---------|--------|-----|----|---|----|------|------|-----------------|------------------|-------------|---|
| snorf_4 | Bra004 | 22  |    |   |    |      |      | AGCAUUUUUACUCUG | UUCAUCAGAGUGAAG  | Cleavage    |   |
| _15     | 232    | 3   | .6 | 1 | 20 | 587  | 606  | AGGAU           | AUGCU            | ge          | 1 |
| snorf_4 | Bra001 | 22  |    |   |    |      |      | AGCAUUUUUACUCUG | AUCUUCAGGGUGUGA  | Cleavage    |   |
| _15     | 724    | 3   | .1 | 1 | 20 | 600  | 619  | AGGAU           | AUGCU            | ge          | 1 |
| snorf_4 | Bra021 | 12  |    |   |    |      |      | AGCAUUUUUACUCUG | AUCUUGAGAGUAAGA  | Cleavage    |   |
| _15     | 294    | 3   | .3 | 1 | 20 | 782  | 801  | AGGAU           | GUGUU            | ge          | 1 |
| snorf_4 | Bra016 | 17  |    |   |    |      |      | AGCAUUUUUACUCUG | AUCUUGAGAGUAAGA  | Cleavage    |   |
| _15     | 570    | 3   | .6 | 1 | 20 | 785  | 804  | AGGAU           | GUGUU            | ge          | 1 |
| snorf_4 | Bra040 | 11  |    |   |    |      |      | AGCAUUUUUACUCUG | AUUCUCAUAGUAAUA  | Cleavage    |   |
| _15     | 585    | 3   | .3 | 1 | 20 | 1112 | 1131 | AGGAU           | AUGCU            | ge          | 1 |
| snorf_4 | Bra025 | 9.  |    |   |    |      |      | AGCAUUUUUACUCUG | AUUCUCACAGUAACAA | Cleavage    |   |
| _15     | 408    | 3   | 2  | 1 | 20 | 1073 | 1092 | AGGAU           | UGCU             | ge          | 1 |
| snorf_4 | Bra027 | 17  |    |   |    |      |      | AGCAUUUUUACUCUG | AUCUUGAGAGGAAAA  | Translation |   |
| _15     | 290    | 2.5 | .2 | 1 | 20 | 1226 | 1245 | AGGAU           | AUGCU            | ation       | 1 |
| snorf_4 | Bra006 | 13  |    |   |    |      |      | AGCAUUUUUACUCUG | AUCCUCAAGGGAAA   | Translation |   |
| _15     | 809    | 3   | .2 | 1 | 20 | 740  | 759  | AGGAU           | AUGUU            | ation       | 1 |
| snorf_4 | Bra030 | 11  |    |   |    |      |      | AUUUUUUUUCUCUGA | GAUCAUGAGAGGAAU  | Cleavage    |   |
| _17     | 997    | 2.5 | .5 | 1 | 20 | 772  | 791  | UGAUC           | GAGAU            | ge          | 1 |
| snorf_4 | Bra030 | 16  |    |   |    |      |      | AUUUUUUUUCUCUGA | GAUCAUGAGAGGAAU  | Cleavage    |   |
| _17     | 998    | 2.5 | .2 | 1 | 20 | 3109 | 3128 | UGAUC           | GAGAU            | ge          | 1 |
| snorf_4 | Bra002 | 15  |    |   |    |      |      | AUUUUUUUUCUCUGA | UAUCAUCAGUGAAAU  | Translation |   |
| _17     | 333    | 3   | .8 | 1 | 20 | 2337 | 2356 | UGAUC           | AAAC             | ation       | 1 |
| snorf_4 | Bra024 | 13  |    |   |    |      |      | AUUUUUUUUCUCUGA | GAUCAUCAGAGCAAU  | Translation |   |
| _17     | 670    | 3   | .0 | 1 | 20 | 504  | 523  | UGAUC           | AGGAG            | ation       | 1 |
| snorf_4 | Bra038 | 15  |    |   |    |      |      | AUUUUUUUUCUCUGA | GAUCUUAAGAGAAAU  | Cleavage    |   |
| _17     | 921    | 2.5 | .8 | 1 | 20 | 232  | 251  | UGAUC           | AAGAU            | ge          | 1 |
| snorf_4 | Bra024 | 15  |    |   |    |      |      | AUUUUUUUUCUCUGA | GAUCAUCAAGAAGU   | Cleavage    |   |
| _17     | 202    | 3   | .1 | 1 | 20 | 1338 | 1357 | UGAUC           | GGAGU            | ge          | 1 |
| snorf_4 | Bra015 | 15  |    |   |    |      |      | AUUUUUUUUCUCUGA | GGUUAUCAAGGAAAU  | Cleavage    |   |
| _17     | 229    | 3   | .5 | 1 | 20 | 855  | 874  | UGAUC           | GAAAU            | ge          | 1 |
| snorf_4 | Bra014 | 20  |    |   |    |      |      | AUUUUUUUUCUCUGA | GAUCAUCAGAUAGAG  | Translation |   |
| _17     | 869    | 3   | .1 | 1 | 20 | 166  | 185  | UGAUC           | AAAAU            | ation       | 1 |
| snorf_4 | Bra025 | 10  |    |   |    |      |      | AUUUUUUUUCUCUGA | GAUCAAGAGAGAAAU  | Cleavage    |   |
| _17     | 087    | 3   | .9 | 1 | 20 | 1056 | 1075 | UGAUC           | AAAAG            | ge          | 1 |

|            |           |   |      |   |    |    |    |                       |                      |             |   |
|------------|-----------|---|------|---|----|----|----|-----------------------|----------------------|-------------|---|
| snorf_4_17 | Bra028506 | 3 | 18.3 | 1 | 20 | 55 | 74 | AUUUUUAUUUCUCUGAUGAUC | GAUCAUGAGAAAGAUGAAAU | Translation | 1 |
|------------|-----------|---|------|---|----|----|----|-----------------------|----------------------|-------------|---|

# snoRF Pollinated ovules

| ncRNA_Acc. | Target_Acc. | Expectation | UPE  | ncRNA_start | ncRNA_end | Target_start | Target_end | ncRNA_aligned_fragment    | Target_aligned_fragment  | Inhibition  | Multiplicity |
|------------|-------------|-------------|------|-------------|-----------|--------------|------------|---------------------------|--------------------------|-------------|--------------|
| snorf_5_1  | Bra005417   | 3           | 15.6 | 1           | 24        | 63           | 86         | GGCCGAUGAUUUUAAAUAAUUUUGA | UUGGAAUUACAUAUUUCAUCGGUU | Cleavage    | 1            |
| snorf_5_2  | Bra039448   | 1           | 15.3 | 1           | 20        | 820          | 839        | CUAAAUGGGAAUCUCUCUGA      | UCAGGGAGAUUCUCAUUUAG     | Cleavage    | 1            |
| snorf_5_2  | Bra034045   | 2           | 14.4 | 1           | 20        | 135          | 154        | CUAAAUGGGAAUCUCUCUGA      | CCAGAGAGAUUCUUAUUUAG     | Cleavage    | 1            |
| snorf_5_2  | Bra029738   | 3           | 14.8 | 1           | 20        | 135          | 154        | CUAAAUGGGAAUCUCUCUGA      | CCAGAGAAAUUCUUAUUAG      | Cleavage    | 1            |
| snorf_5_4  | Bra039448   | 1           | 15.3 | 1           | 20        | 820          | 839        | CUAAAUGGGAAUCUCUCUGA      | UCAGGGAGAUUCUCAUUUAG     | Cleavage    | 1            |
| snorf_5_4  | Bra034045   | 2           | 14.4 | 1           | 20        | 135          | 154        | CUAAAUGGGAAUCUCUCUGA      | CCAGAGAGAUUCUUAUUUAG     | Cleavage    | 1            |
| snorf_5_4  | Bra029738   | 3           | 14.8 | 1           | 20        | 135          | 154        | CUAAAUGGGAAUCUCUCUGA      | CCAGAGAAAUUCUUAUUAG      | Cleavage    | 1            |
| snorf_5_7  | Bra028460   | 3           | 14.5 | 1           | 23        | 4537         | 4559       | AUGGAGACCUGAACUGAAGAGUU   | AAAGCUUUAAUUCGGGUCUCCAU  | Cleavage    | 1            |
| snorf_5_7  | Bra016932   | 3           | 20.3 | 1           | 23        | 9            | 30         | AUGGAGACCUGAACUGAAGAGUU   | GGUUCUUCAGUU-AGGUCUCCAG  | Translation | 1            |
| snorf_5_7  | Bra022483   | 3           | 17.9 | 1           | 21        | 61           | 81         | AUGGAGACCUGAACUGAAGAG     | UUCUUCACUUCAAGUCCAG      | Translation | 1            |
| snorf_5_7  | Bra015521   | 3           | 22.9 | 1           | 23        | 344          | 365        | AUGGAGACCUGAACUGAAGAGUU   | AGUUCUUGAGU-CAGGUCUCCAU  | Cleavage    | 1            |
| snorf_5_7  | Bra030840   | 3           | 18.3 | 1           | 20        | 994          | 1013       | AUGGAGACCUGAACUGAAGA      | UCUUCAAUUCAGAUUUCUUAU    | Cleavage    | 1            |
| snorf_5_8  | Bra028460   | 2           | 14.6 | 1           | 24        | 4537         | 4560       | AAUGGAGACCUGAACUGAAGAGUU  | AAAGCUUUAAUUCGGGUCUCCAUU | Cleavage    | 1            |

|         |        |     |    |   |    |      |      |                  |                  |          |   |
|---------|--------|-----|----|---|----|------|------|------------------|------------------|----------|---|
| snorf_5 | Bra028 | 14  |    |   |    |      |      | UAAUGGAGACCUGAAC | AAAGCUUUAAUUCGG  | Cleavage |   |
| _9      | 460    | 2.5 | .6 | 1 | 25 | 4537 | 4561 | UGAAGAGUU        | GUCUCCAUUG       | ge       | 1 |
| snorf_5 | Bra006 | 22  |    |   |    |      |      | AUUGGAGACCUGAAC  | ACUCUUCAGUUCUGG  | Transl   |   |
| _10     | 754    | 3   | .3 | 1 | 23 | 177  | 199  | UGAAGAGU         | ACUCCAAG         | ation    | 2 |
| snorf_5 | Bra006 | 23  |    |   |    |      |      | AUUGGAGACCUGAAC  | ACUCUUCAGUUCUGG  | Transl   |   |
| _10     | 754    | 3   | .4 | 1 | 23 | 924  | 946  | UGAAGAGU         | ACUCCAAG         | ation    | 2 |
| snorf_5 | Bra010 | 18  |    |   |    |      |      | AUUGGAGACCUGAAC  | AAUCCUCCGGUUCAGG | Cleavage |   |
| _10     | 291    | 2.5 | .8 | 1 | 24 | 173  | 196  | UGAAGAGUU        | UUUUCAAU         | ge       | 1 |
| snorf_5 | Bra020 | 21  |    |   |    |      |      | AUUGGAGACCUGAAC  | AGAUCUCCGGUUCAG  | Cleavage |   |
| _10     | 436    | 2.5 | .2 | 1 | 24 | 158  | 181  | UGAAGAGUU        | GUUUUCAAU        | ge       | 1 |
| snorf_5 | Bra038 | 20  |    |   |    |      |      | AUUGGAGACCUGAAC  | GGUUCUUCAGUUUGG  | Transl   |   |
| _10     | 148    | 3   | .6 | 1 | 24 | 902  | 925  | UGAAGAGUU        | CUCUCCGGU        | ation    | 1 |
| snorf_5 | Bra002 | 14  |    |   |    |      |      | AUUGGAGACCUGAAC  | AGAUCUCUGGUUCAG  | Cleavage |   |
| _10     | 723    | 3   | .2 | 1 | 24 | 167  | 190  | UGAAGAGUU        | GUUUUCAAU        | ge       | 1 |
| snorf_5 | Bra017 | 14  |    |   |    |      |      | AUUGGAGACCUGAAC  | AAACAGUUCAGGUCUC | Cleavage |   |
| _10     | 838    | 3   | .8 | 1 | 20 | 545  | 564  | UGAAG            | CAAU             | ge       | 1 |
| snorf_5 | Bra023 | 20  |    |   |    |      |      | AUUGGAGACCUGAAC  | CCUCGGUUCAAGUUUC | Transl   |   |
| _10     | 921    | 3   | .1 | 1 | 20 | 837  | 856  | UGAAG            | CAAU             | ation    | 1 |
| snorf_5 | Bra015 | 19  |    |   |    |      |      | AUUGGAGACCUGAAC  | CUUCAGUUCGCGGUU  | Transl   |   |
| _10     | 683    | 3   | .1 | 1 | 20 | 244  | 263  | UGAAG            | CCAAU            | ation    | 1 |
| snorf_5 | Bra006 | 22  |    |   |    |      |      | UUGGAGACCUGAACU  | ACUCUUCAGUUCUGG  | Transl   |   |
| _12     | 754    | 2.5 | .1 | 1 | 22 | 177  | 198  | GAAGAGU          | ACUCCAA          | ation    | 2 |
| snorf_5 | Bra006 | 23  |    |   |    |      |      | UUGGAGACCUGAACU  | ACUCUUCAGUUCUGG  | Transl   |   |
| _12     | 754    | 2.5 | .5 | 1 | 22 | 924  | 945  | GAAGAGU          | ACUCCAA          | ation    | 2 |
| snorf_5 | Bra020 | 21  |    |   |    |      |      | UUGGAGACCUGAACU  | AGAUCUCCGGUUCAG  | Cleavage |   |
| _12     | 436    | 2.5 | .4 | 1 | 23 | 158  | 180  | GAAGAGUU         | GUUUUCAA         | ge       | 1 |
| snorf_5 | Bra038 | 19  |    |   |    |      |      | UUGGAGACCUGAACU  | GGUUCUUCAGUUUGG  | Cleavage |   |
| _12     | 148    | 3   | .3 | 1 | 23 | 902  | 924  | GAAGAGUU         | CUCUCCGG         | ge       | 1 |
| snorf_5 | Bra002 | 14  |    |   |    |      |      | UUGGAGACCUGAACU  | AGAUCUCUGGUUCAG  | Cleavage |   |
| _12     | 723    | 3   | .0 | 1 | 23 | 167  | 189  | GAAGAGUU         | GUUUUCAA         | ge       | 1 |
| snorf_5 | Bra032 | 18  |    |   |    |      |      | UUGGAGACCUGAACU  | AAGUCUUCAGAUCGU  | Transl   |   |
| _12     | 144    | 3   | .8 | 1 | 23 | 934  | 956  | GAAGAGUU         | GUUUCCAA         | ation    | 1 |
| snorf_5 | Bra038 | 23  |    |   |    |      |      | UUGGAGACCUGAACU  | GGUUCUUUGGACCAG  | Cleavage |   |
| _12     | 611    | 3   | .3 | 1 | 23 | 1122 | 1144 | GAAGAGUU         | GUCUCCAA         | ge       | 1 |

|         |        |     |    |   |    |      |      |                  |                  |        |   |
|---------|--------|-----|----|---|----|------|------|------------------|------------------|--------|---|
| snorf_5 | Bra016 | 20  |    |   |    |      |      | UUGGAGACCUGAACU  | GGUUCUUCAGUU-    | Transl |   |
| _12     | 932    | 2.5 | .3 | 1 | 23 | 9    | 30   | GAAGAGUU         | AGGUCUCCAG       | ation  | 1 |
| snorf_5 | Bra022 | 17  |    |   |    |      |      | UUGGAGACCUGAACU  | UUCUUCACUUAAGUC  | Transl |   |
| _12     | 483    | 2.5 | .9 | 1 | 21 | 61   | 81   | GAAGAG           | UCCAG            | ation  | 1 |
| snorf_5 | Bra026 | 10  |    |   |    |      |      | UUGGAGACCUGAACU  | CUUUUCACUUCACGUC | Transl |   |
| _12     | 846    | 3   | .6 | 1 | 21 | 49   | 69   | GAAGAG           | UUCAA            | ation  | 1 |
| snorf_5 | Bra000 | 20  |    |   |    |      |      | UUGGAGACCUGAACU  | GUUCUUCAGUUCAAU  | Transl |   |
| _12     | 658    | 3   | .5 | 1 | 22 | 1025 | 1046 | GAAGAGU          | UCUCUAG          | ation  | 1 |
| snorf_5 | Bra025 | 16  |    |   |    |      |      | UUGGAGACCUGAACU  | UUCUUCAGUUCAUCU  | Transl |   |
| _12     | 935    | 3   | .6 | 1 | 21 | 239  | 259  | GAAGAG           | UUCUAA           | ation  | 1 |
| snorf_5 | Bra002 | 14  |    |   |    |      |      | UUGGAGACCUGAACU  | AAUCUUCACUUGAAG  | Transl |   |
| _12     | 246    | 3   | .7 | 1 | 22 | 1049 | 1070 | GAAGAGU          | UCUCCAA          | ation  | 1 |
| snorf_5 | Bra037 | 23  |    |   |    |      |      | AAUCAAGCCAAUGUUC | UGGCUCAGAAUAUUG  | Cleava |   |
| _18     | 378    | 2.5 | .6 | 1 | 23 | 1412 | 1434 | UGAUCCA          | GCUUGAUG         | ge     | 1 |
| snorf_5 | Bra028 | 15  |    |   |    |      |      | AAUCAAGCCAAUGUUC | AUAGAUCAGAACAUUA | Transl |   |
| _18     | 461    | 2.5 | .9 | 1 | 24 | 379  | 402  | UGAUCCA          | GUUUGAUC         | ation  | 1 |
| snorf_5 | Bra000 | 14  |    |   |    |      |      | AAUCAAGCCAAUGUUC | UGGCUCGGAUAUUG   | Cleava |   |
| _18     | 949    | 3   | .8 | 1 | 23 | 1454 | 1476 | UGAUCCA          | GCUUGAUG         | ge     | 1 |
| snorf_5 | Bra004 | 22  |    |   |    |      |      | AGCAUUUUUACUCUG  | UUCAUCAGAGUGAAG  | Cleava |   |
| _20     | 232    | 3   | .6 | 1 | 20 | 587  | 606  | AGGAU            | AUGCU            | ge     | 1 |
| snorf_5 | Bra001 | 22  |    |   |    |      |      | AGCAUUUUUACUCUG  | AUCUUCAGGGUGUGA  | Cleava |   |
| _20     | 724    | 3   | .1 | 1 | 20 | 600  | 619  | AGGAU            | AUGCU            | ge     | 1 |
| snorf_5 | Bra021 | 12  |    |   |    |      |      | AGCAUUUUUACUCUG  | AUCUUGAGAGUAAGA  | Cleava |   |
| _20     | 294    | 3   | .3 | 1 | 20 | 782  | 801  | AGGAU            | GUGUU            | ge     | 1 |
| snorf_5 | Bra016 | 17  |    |   |    |      |      | AGCAUUUUUACUCUG  | AUCUUGAGAGUAAGA  | Cleava |   |
| _20     | 570    | 3   | .6 | 1 | 20 | 785  | 804  | AGGAU            | GUGUU            | ge     | 1 |
| snorf_5 | Bra040 | 11  |    |   |    |      |      | AGCAUUUUUACUCUG  | AUUCUCAUAGUAAUA  | Cleava |   |
| _20     | 585    | 3   | .3 | 1 | 20 | 1112 | 1131 | AGGAU            | AUGCU            | ge     | 1 |
| snorf_5 | Bra025 | 9.  |    |   |    |      |      | AGCAUUUUUACUCUG  | AUUCUCACAGUAACAA | Cleava |   |
| _20     | 408    | 3   | 2  | 1 | 20 | 1073 | 1092 | AGGAU            | UGCU             | ge     | 1 |
| snorf_5 | Bra027 | 17  |    |   |    |      |      | AGCAUUUUUACUCUG  | AUCUUGAGAGGAAAA  | Transl |   |
| _20     | 290    | 2.5 | .2 | 1 | 20 | 1226 | 1245 | AGGAU            | AUGCU            | ation  | 1 |
| snorf_5 | Bra006 | 13  |    |   |    |      |      | AGCAUUUUUACUCUG  | AUCCUCAAAGGGAAAA | Transl |   |
| _20     | 809    | 3   | .2 | 1 | 20 | 740  | 759  | AGGAU            | UGUU             | ation  | 1 |



# snoRF Embryo

| ncRNA<br>_Acc. | Target<br>_Acc. | Expect<br>ation | U<br>PE | ncRNA<br>_start | ncRNA<br>_end | Target_<br>start | Target<br>_end | ncRNA_aligned_fragme<br>nt    | Target_aligned_fragme<br>nt   | Inhibit<br>ion  | Multip<br>licity |
|----------------|-----------------|-----------------|---------|-----------------|---------------|------------------|----------------|-------------------------------|-------------------------------|-----------------|------------------|
| snorf_6_3      | Bra029738       | 3               | .8      | 1               | 20            | 135              | 154            | CUAAAUGGGAAUCUCU<br>CUGA      | CCAGAGAAAUUCUUAU<br>UUAG      | Cleava<br>ge    | 1                |
| snorf_6_3      | Bra034045       | 2               | .4      | 1               | 20            | 135              | 154            | CUAAAUGGGAAUCUCU<br>CUGA      | CCAGAGAGAUUCUUAU<br>UUAG      | Cleava<br>ge    | 1                |
| snorf_6_3      | Bra039448       | 1               | .3      | 1               | 20            | 820              | 839            | CUAAAUGGGAAUCUCU<br>CUGA      | UCAGGGAGAUUCUCAU<br>UUAG      | Cleava<br>ge    | 1                |
| snorf_6_1      | Bra000855       | 3               | .5      | 1               | 20            | 1892             | 1911           | GAGCUGUGAUGAUAU<br>UAGGC      | GUUUAAUAAUAUCACA<br>GCUU      | Cleava<br>ge    | 1                |
| snorf_6_8      | Bra001667       | 3               | .3      | 1               | 23            | 189              | 211            | UAUGGAGACCUGAACU<br>GAGUGGA   | UUCAUUCAGUUUAGAU<br>UCCAUG    | Transl<br>ation | 1                |
| snorf_6_9      | Bra002352       | 2               | .8      | 1               | 20            | 841              | 860            | UCAAGUUUGGCUAUUC<br>UGUU      | AAUGGAAUAGCAAAAC<br>UUGA      | Transl<br>ation | 1                |
| snorf_6_8      | Bra003395       | 3               | .1      | 1               | 25            | 942              | 966            | UAUGGAGACCUGAACU<br>GAGUGGAGG | CUCUCACUCAGUGCAG<br>GUCAUCAUA | Cleava<br>ge    | 1                |
| snorf_6_4      | Bra003828       | 3               | .2      | 1               | 20            | 600              | 619            | GAUGAUUCUUCUGCAA<br>UUCU      | AGAAUUGUACAAGAAA<br>CAUC      | Transl<br>ation | 1                |
| snorf_6_1      | Bra004297       | 3               | .0      | 1               | 20            | 621              | 640            | GAGCUGUGAUGAUAU<br>UAGGC      | GCCUGAUCUCAUGACA<br>GUUC      | Cleava<br>ge    | 1                |
| snorf_6_2      | Bra005417       | 3               | .6      | 1               | 24            | 63               | 86             | GGCCGAUGAUUUAAA<br>AAUUUUGA   | UUGGAAUUACAUAUU<br>CAUCGGUU   | Cleava<br>ge    | 1                |
| snorf_6_6      | Bra006739       | 2.5             | .8      | 1               | 20            | 1231             | 1250           | CUACCCAUUUUUUUC<br>UGAG       | CUCAGAAACAAUAUGG<br>UUAG      | Cleava<br>ge    | 1                |
| snorf_6_9      | Bra007263       | 2.5             | .3      | 1               | 20            | 1363             | 1382           | UCAAGUUUGGCUAUUC<br>UGUU      | AACAGAAUAGCAAAAC<br>AUGA      | Transl<br>ation | 1                |
| snorf_6_8      | Bra007493       | 3               | .1      | 1               | 25            | 942              | 966            | UAUGGAGACCUGAACU<br>GAGUGGAGG | CUCUCACUCAGUACAG<br>GUCAUCAUA | Cleava<br>ge    | 1                |
| snorf_6_9      | Bra011260       | 2               | .2      | 1               | 20            | 499              | 518            | UCAAGUUUGGCUAUUC<br>UGUU      | AACAAAAUAGGCAAAC<br>UUGA      | Transl<br>ation | 1                |
| snorf_6_7      | Bra013275       | 2.5             | .1      | 1               | 23            | 1784             | 1805           | UGAUUAAAAACUAUCA<br>GCUCUGA   | UCGGAGUUGA-<br>AGUUUUUAAUCA   | Cleava<br>ge    | 1                |

|            |        |     |    |   |    |      |      |                  |                  |             |   |
|------------|--------|-----|----|---|----|------|------|------------------|------------------|-------------|---|
| snorf_6_7  | Bra013 | 11  |    |   |    |      |      | UGAUUAAAAACUAUCA | GGGUUGGAAGUUUUU  | Cleavage    | 1 |
|            | 867    | 3   | .2 | 1 | 20 | 163  | 182  | GCUC             | GAUCA            |             |   |
| snorf_6_8  | Bra014 | 14  |    |   |    |      |      | UAUGGAGACCUGAACU | CUCUCACUCAGUACAG | Cleavage    | 1 |
|            | 523    | 3   | .6 | 1 | 25 | 942  | 966  | GAGUGGAGG        | GUCAUCAUA        |             |   |
| snorf_6_9  | Bra014 | 24  |    |   |    |      |      | UCAAGUUUGGCUAUUC | UGCAAAAGAAUGGCCA | Cleavage    | 1 |
|            | 985    | 3   | .0 | 1 | 23 | 303  | 325  | UGUUACA          | AGCUUGC          |             |   |
| snorf_6_8  | Bra016 | 17  |    |   |    |      |      | UAUGGAGACCUGAACU | ACUCAGUUCGAGUCUC | Translation | 1 |
|            | 345    | 3   | .3 | 1 | 20 | 671  | 690  | GAGU             | CAAA             |             |   |
| snorf_6_7  | Bra019 | 14  |    |   |    |      |      | UGAUUAAAAACU-    | AGAGCUGAUGAGUUU  | Cleavage    | 1 |
|            | 178    | 2.5 | .9 | 1 | 21 | 1696 | 1717 | AUCAGCUCU        | UUGAUC           |             |   |
| snorf_6_1  | Bra022 | 16  |    |   |    |      |      | GAGCUGUGAUGAUU   | CCCUAAUGUUGUCACA | Cleavage    | 1 |
|            | 523    | 3   | .4 | 1 | 20 | 288  | 307  | UAGGC            | GUUC             |             |   |
| snorf_6_8  | Bra024 | 23  |    |   |    |      |      | UAUGGAGACCUGAACU | ACUCAGUUCGAGUCUC | Translation | 1 |
|            | 602    | 3   | .3 | 1 | 20 | 593  | 612  | GAGU             | CAAA             |             |   |
| snorf_6_4  | Bra025 | 20  |    |   |    |      |      | GAUGAUUCUUCUGCAA | UAGCAUUGCAGAUAG  | Translation | 1 |
|            | 126    | 3   | .4 | 1 | 21 | 668  | 688  | UUCUG            | UCAUU            |             |   |
| snorf_6_4  | Bra025 | 24  |    |   |    |      |      | GAUGAUUCUUCUGCAA | ACCUUGAGAACUGCAG | Cleavage    | 1 |
|            | 654    | 3   | .5 | 1 | 26 | 464  | 489  | UUCUGAGGCU       | GAGAAUGAUC       |             |   |
| snorf_6_10 | Bra025 | 18  |    |   |    |      |      | ACUGUUUUACUCGGUG | CUGCAGCCAAGUAGAA | Cleavage    | 1 |
|            | 882    | 3   | .7 | 1 | 20 | 1332 | 1351 | GCAG             | CAGU             |             |   |
| snorf_6_4  | Bra026 | 18  |    |   |    |      |      | GAUGAUUCUUCUGCAA | UAGCAUUGCAGAUAG  | Translation | 1 |
|            | 543    | 3   | .5 | 1 | 21 | 704  | 724  | UUCUG            | UCAUU            |             |   |
| snorf_6_9  | Bra026 | 15  |    |   |    |      |      | UCAAGUUUGGCUAUUC | UAUCAGAAUUGUCAAG | Cleavage    | 1 |
|            | 682    | 3   | .4 | 1 | 21 | 1787 | 1807 | UGUUA            | CUUGA            |             |   |
| snorf_6_1  | Bra026 | 18  |    |   |    |      |      | GAGCUGUGAUGAUU   | GUCUAAUCACAUCACA | Cleavage    | 1 |
|            | 759    | 3   | .1 | 1 | 20 | 203  | 222  | UAGGC            | GUUC             |             |   |
| snorf_6_9  | Bra026 | 14  |    |   |    |      |      | UCAAGUUUGGCUAUUC | UAUCAGAAUUGUCAAG | Cleavage    | 1 |
|            | 977    | 3   | .1 | 1 | 21 | 1886 | 1906 | UGUUA            | CUUGA            |             |   |
| snorf_6_10 | Bra027 | 19  |    |   |    |      |      | ACUGUUUUACUCGGUG | CUGCCACUGAGGUAAA | Translation | 1 |
|            | 641    | 2.5 | .4 | 1 | 20 | 2087 | 2106 | GCAG             | CAGU             |             |   |
| snorf_6_9  | Bra027 | 13  |    |   |    |      |      | UCAAGUUUGGCUAUUC | GACACAAUAGCUAAGC | Cleavage    | 1 |
|            | 883    | 2.5 | .4 | 1 | 20 | 781  | 800  | UGUU             | UUGA             |             |   |
| snorf_6_4  | Bra028 | 20  |    |   |    |      |      | GAUGAUUCUUCUGCAA | ACCUUGAGAACUGCAG | Cleavage    | 1 |
|            | 438    | 2.5 | .7 | 1 | 26 | 488  | 513  | UUCUGAGGCU       | AAGAAUGAUC       |             |   |

|            |        |     |    |   |    |      |      |                  |                  |             |   |
|------------|--------|-----|----|---|----|------|------|------------------|------------------|-------------|---|
| snorf_6_4  | Bra029 | 20  |    |   |    |      |      | GAUGAUUCUUCUGCAA | CAUGGAGUUGCUGAAG | Cleavage    | 1 |
|            | 440    | 2.5 | .8 | 1 | 23 | 742  | 764  | UUCUGAG          | GAUCAUC          |             |   |
| snorf_6_1  | Bra032 | 18  |    |   |    |      |      | GAGCUGUGAUGAUAU  | GUCCGAUAUCAUUACA | Cleavage    | 1 |
|            | 852    | 3   | .5 | 1 | 20 | 857  | 876  | UAGGC            | GCUU             |             |   |
| snorf_6_10 | Bra032 | 17  |    |   |    |      |      | ACUGUUUUACUCGGUG | UCUCUCCACCGCGUC  | Translation | 1 |
|            | 960    | 3   | .8 | 1 | 23 | 521  | 543  | GCAGAAA          | AAACAGU          |             |   |
| snorf_6_4  | Bra034 | 19  |    |   |    |      |      | GAUGAU-          | UGGGAUUGCAGAAGAC | Cleavage    | 1 |
|            | 014    | 3   | .6 | 1 | 21 | 416  | 437  | UCUUCUGCAAUUCUG  | AUCAUC           |             |   |
| snorf_6_4  | Bra034 | 18  |    |   |    |      |      | GAUGAUUCUUCUGCAA | UGGGACUGCAGAAGAA | Cleavage    | 1 |
|            | 260    | 2.5 | .7 | 1 | 21 | 957  | 977  | UUCUG            | UCGUC            |             |   |
| snorf_6_9  | Bra035 | 10  |    |   |    |      |      | UCAAGUUUGGCUAUUC | UCACAGAAUAGCAGAA | Translation | 1 |
|            | 539    | 2.5 | .0 | 1 | 21 | 1092 | 1112 | UGUUA            | CUUGA            |             |   |
| snorf_6_1  | Bra035 | 20  |    |   |    |      |      | GAGCUGUGAUGAUAU  | GCCUAGUCUCGUCACG | Cleavage    | 1 |
|            | 613    | 2.5 | .7 | 1 | 20 | 153  | 172  | UAGGC            | GCUC             |             |   |
| snorf_6_7  | Bra037 | 23  |    |   |    |      |      | UGAUUAAAAACUAUCA | UCUGAAGAGCUGAUGU | Translation | 1 |
|            | 647    | 3   | .4 | 1 | 26 | 1570 | 1595 | GCUCUGAGGG       | CUUUUGAUCA       |             |   |
| snorf_6_4  | Bra039 | 20  |    |   |    |      |      | GAUGAUUCUUCUGCAA | UCAACGUUGCAGAAGA | Cleavage    | 1 |
|            | 659    | 3   | .2 | 1 | 22 | 1160 | 1181 | UUCUGA           | GUCAUC           |             |   |
| snorf_6_9  | Bra040 | 17  |    |   |    |      |      | UCAAGUUUGGCUAUUC | GCAUCUCACAGAAUAG | Translation | 1 |
|            | 779    | 3   | .4 | 1 | 26 | 871  | 896  | UGUUACAUUC       | CAGAAUUUGA       |             |   |
| snorf_6_1  | Bra040 | 17  |    |   |    |      |      | GAGCUGUGA-       | UCUGAUUAUCAUCACA | Translation | 1 |
|            | 986    | 3   | .9 | 1 | 19 | 3393 | 3412 | UGAUUUUAGG       | GCUC             |             |   |
